# Supplementary material for: Long-read single-cell sequencing reveals expressions of hypermutation clusters of isoforms in human liver cancer cells
Source: eLife. 2024 Jan 11;12:RP87607. doi: 10.7554/eLife.87607 (PMC10945587; doi:10.7554/eLife.87607)
Supplement: Supplementary file 2. [file elife-87607-supp2.xlsx]

## Sheet: Supplemental table 2
Supplemental table 2: Mutation isoform expressions
Mutation	N.AAAGGATGTGTACAGG	N.AACCTTTCAGAAGCGT	N.AACGTCACAGAGACTG	N.AACTTCTAGGGATCAC	N.AAGACTCAGGGAGAAT	N.AAGCGTTAGGTGCGAT	N.AAGGTAATCACGGGCT	N.AATGGAAGTATAGGGC	N.AATGGCTTCCCGAACG	N.ACACTGAGTATTCCGA	N.ACACTGATCACTGGTA	N.ACCTACCAGCTGACTT	N.ACCTGTCCAAAGAGTT	N.ACGGAAGAGCAAACAT	N.ACGTACACATCAGCAT	N.ACGTACATCGCAACAT	N.ACGTAGTAGGCCCAAA	N.AGAAATGAGGGCGAGA	N.AGAACAATCGCGCTGA	N.AGACAAAGTATTGCCA	N.AGCGTCGCAGTTGGTT	N.AGGAGGTGTTAGCTAC	N.AGGCATTAGTAAGCAT	N.AGGGTCCCACGGCGTT	N.AGTCAACTCCTCTGCA	N.AGTCATGCAATCGCCG	N.ATACCTTTCCGGGACT	N.ATAGACCTCTCGCTCA	N.ATAGAGATCAGTCAGT	N.ATCCGTCAGAAACACT	N.ATCTTCAGTTCCCACT	N.ATGCCTCGTGTGTCGC	N.ATGCCTCTCATGCCAA	N.ATTCAGGTCGCTGTTC	N.CAACAGTCACCCTAAA	N.CAACAGTCACCTCGTT	N.CAACAGTTCGATGCTA	N.CAACGATTCCGGACGT	N.CAAGAGGCAATAGTCC	N.CAATTTCGTGGACTGA	N.CAATTTCTCATCCCGT	N.CACACAACACGAAGAC	N.CACGAATTCATCGCTC	N.CACTGTCCAGTCTTCC	N.CAGATACCAAGTAGTA	N.CAGATACGTTAGCTAC	N.CAGATACTCGGCTGAC	N.CAGATTGGTGAAGCGT	N.CAGGTATAGAGAGCAA
Group	Normal	Normal	Normal	Normal	Normal	Normal	Normal	Normal	Normal	Normal	Normal	Normal	Normal	Normal	Normal	Normal	Normal	Normal	Normal	Normal	Normal	Normal	Normal	Normal	Normal	Normal	Normal	Normal	Normal	Normal	Normal	Normal	Normal	Normal	Normal	Normal	Normal	Normal	Normal	Normal	Normal	Normal	Normal	Normal	Normal	Normal	Normal	Normal	Normal
chr3__133766289__A__G__TF__NM_001063__missense_variant__c.1342A>G__p.Ile448Val	1	1	0	0	1	1	1	1	1	1	0.888889	1	0	1	1	1	1	0	1	1	1	0.863636	1	1	1	0	0.970588	0	1	1	0.833333	1	1	0	1	1	0.875	0	1	1	1	1	1	1	0.8	1	1	0	1
chr3__186619924__T__C__AHSG__NM_001622__missense_variant__c.743T>C__p.Met248Thr	1	1	1	1	1	1	1	1	0.666667	1	1	0	1	1	1	1	1	0	0	1	0.923077	1	1	1	1	1	1	0	1	1	1	1	1	1	1	1	1	1	1	1	1	1	1	1	1	1	1	1	1
chr3__186620593__G__C__AHSG__NM_001622__missense_variant__c.767G>C__p.Ser256Thr	1	1	1	0	1	1	1	1	1	1	1	1	1	1	1	1	1	0	0	1	1	1	1	1	1	1	1	0	1	1	1	1	1	1	0	1	1	1	1	1	1	1	1	1	1	1	1	0	1
chr3__186620593__G__C,T__AHSG__NM_001622__missense_variant__c.767G>C__p.Ser256Thr	1	1	1	1	1	1	1	1	0	1	0	0	0	1	1	0	0	0	0	0	1	1	0	1	1	0	1	0	0	1	1	1	1	0	1	1	1	0	0	1	1	1	0	1	1	1	1	1	1
chr3__186725229__T__C__KNG1__NM_000893__missense_variant__c.533T>C__p.Met178Thr	1	1	1	0	1	1	0	0	0	1	0	1	1	0	1	1	0	1	0	0	1	1	1	1	0	1	1	0	1	0	1	1	0	0	0	1	1	0	0	1	1	0.9	1	1	1	1	1	0	1
chr4__71752579__T__C__GC__NM_001204307__missense_variant__c.1391A>G__p.His464Arg	1	1	1	0	1	1	1	1	1	1	1	1	1	1	1	1	0	0	0	0	1	1	1	1	0	0	1	0	1	1	1	1	1	1	1	1	0.888889	1	1	1	1	1	0	1	1	1	1	1	1
chr5__35860966__T__C__IL7R__NR_120485__missense_variant__c.197T>C__p.Ile66Thr	0	0	0	0	0	0	0	0	0	0	0	0	0	0	0	0	0	0	0	0	0	0	0	0	0	1	0	1	0	0	0	0	0	0	0	0	0	0	0	0	0	1	0	0	0	0	0	0	0
chr5__53646253__A__C__NDUFS4__NM_002495__missense_variant__c.370A>C__p.Ser124Arg	0	0	1	0	1	1	1	0	1	0	0	0	1	0	0	0	0	0	0	0	0	0	0	0	1	1	1	0	0	0	1	0	0	0	1	0	1	0	1	0	0.666667	1	0	0	0	0	1	0	0
chr6__29725234__C__T__HLA-F__NM_018950_6__missense_variant__c.814C>T__p.Pro272Ser	1	1	0	0	0	0	0	0	0	0	0	0	0	0	0	0	0	0	0	0	0	0	0	0	0	1	0	0	0	0	0	0	0	0	0	0	1	0	0	0	0	1	1	0	0	0	0	0	0
chr6__29942594__C__T__HLA-A__NM_002116_3__missense_variant__c.41C>T__p.Ser14Leu	1	0	0	0	0	0	0	0	0	0	0	0	0	0	0	0	0	0	0	0	0	0	0	0	0	1	0	1	1	1	0	0	1	0	0	0	0	0	0	0	0	1	0	0	0	0	0	0	0
chr6__29942594__C__T,G__HLA-A__NM_002116_3__missense_variant__c.41C>T__p.Ser14Leu	0	0	0	0	0	0	0	0	0	0	0	0	0	0	0	0	0	0	0	0	0	0	0	0	0	0	0	0	0	0	0	0	0	0	0	0	0	0	0	0	0	0	0	0	0	0	0	0	0
chr6__29942940__A__G__HLA-A__NM_002116_3__missense_variant__c.257A>G__p.Gln86Arg	1	0	0	1	0	0	0	0	0	0	0	0	0	0	0	0	0	0	0	0	0	0	0	0	0	0.5	0	0	1	1	0	0	1	0	0	0	0	0	0	0	0	0.333333	0	0	0	0	0	0	0
chr6__29942942__G__A,C__HLA-A__NM_002116_3__missense_variant__c.259G>A__p.Glu87Lys	1	0	0	1	0	0	0	0	0	0	0	0	0	0	0	0	0	0	0	0	0	0	0	0	0	0	0	0	0	1	0	0	1	0	0	0	0	0	0	0	0	0.333333	0	0	0	0	0	0	0
chr6__29942944__G__C__HLA-A__NM_002116_3__missense_variant__c.261G>C__p.Glu87Asp	1	0	0	1	0	0	0	0	0	0	0	0	0	0	0	0	0	0	0	0	0	0	0	0	0	0.5	0	0	1	1	0	0	1	0	0	0	0	0	0	0	0	0.333333	0	0	0	0	0	0	0
chr6__29942965__G__C,T__HLA-A__NM_002116_3__missense_variant__c.282G>C__p.Gln94His	0	0	0	0	0	0	0	0	0	0	0	0	0	0	0	0	0	0	0	0	0	0	0	0	0	0	0	0	0	0	0	0	0	0	0	0	0	0	0	0	0	0	0	0	0	0	0	0	0
chr6__29942965__G__C,A__HLA-A__NM_002116_3__missense_variant__c.282G>C__p.Gln94His	0	0	0	0	0	0	0	0	0	0	0	0	0	0	0	0	0	0	0	0	0	0	0	0	0	0	0	0	0	0	0	0	0	0	0	0	0	0	0	0	0	0	0	0	0	0	0	0	0
chr6__29942973__C__T__HLA-A__NM_002116_3__missense_variant__c.290C>T__p.Thr97Ile	1	0	0	1	0	0	0	0	0	0	0	0	0	0	0	0	0	0	0	0	0	0	0	0	0	0.5	0	0	1	1	0	0	1	0	0	0	0	0	0	0	0	0.333333	0	0	0	0	0	0	0
chr6__29943287__A__G__HLA-A__NM_002116_3__missense_variant__c.363A>G__p.Ile121Met	1	0	0	1	0	0	0	0	0	1	0	0	0	0	0	0	0	0	0	0	0	0	0	0	0	1	0	1	1	1	0	0	1	0	0	0	0	0	0	0	0	1	0	0	0	0	0	1	0
chr6__29943337__G__A,C__HLA-A__NM_002116_3__missense_variant__c.413G>A__p.Arg138Gln	0	0	0	0	0	0	0	0	0	0	0	0	0	0	0	0	0	0	0	0	0	0	0	0	0	1	0	0	1	0	0	0	0	0	0	0	0	0	0	0	0	1	0	0	0	0	0	1	0
chr6__29943337__G__A__HLA-A__NM_002116_3__missense_variant__c.413G>A__p.Arg138Gln	1	0	0	1	0	0	0	0	0	1	0	0	0	0	0	0	0	0	0	0	0	0	0	0	0	0	0	1	0	1	0	0	1	0	0	0	0	0	0	0	0	1	0	0	0	0	0	0	0
chr6__29943426__A__C,T__HLA-A__NM_002116_3__missense_variant__c.502A>C__p.Lys168Gln	0	0	0	0	0	0	0	0	0	0	0	0	0	0	0	0	0	0	0	0	0	0	0	0	0	0	0	0	0	0	0	0	0	0	0	0	0	0	0	0	0	0	0	0	0	0	0	0	0
chr6__29943448__A__G__HLA-A__NM_002116_3__missense_variant__c.524A>G__p.His175Arg	1	0	0	1	0	0	0	0	0	1	0	0	0	0	0	0	0	0	0	0	0	0	0	0	0	1	1	1	1	1	0	0	1	0	0	0	0	0	0	0	0	1	0	0	0	0	0	1	0
chr6__29943448__A__G,C__HLA-A__NM_002116_3__missense_variant__c.524A>G__p.His175Arg	0	0	0	0	0	0	0	0	0	0	0	0	0	0	0	0	0	0	0	0	0	0	0	0	0	0	0	0	0	0	0	0	0	0	0	0	0	0	0	0	0	0	0	0	0	0	0	0	0
chr6__29943451__A__T__HLA-A__NM_002116_3__missense_variant__c.527A>T__p.Glu176Val	1	0	0	1	0	0	0	0	0	1	0	0	0	0	0	1	0	0	0	0	0	0	0	0	0	1	1	1	1	1	0	0	1	0	0	0	0	0	0	0	0	1	0	0	0	0	0	1	0
chr6__29943479__T__G__HLA-A__NM_002116_3__missense_variant__c.555T>G__p.Asp185Glu	1	0	0	1	0	0	0	0	0	1	0	0	0	0	0	1	0	0	0	0	0	0	0	0	0	1	1	1	1	1	0	0	1	0	0	0	0	0	0	0	0	1	0	0	0	0	0	1	0
chr6__29943507__T__C__HLA-A__NM_002116_3__missense_variant__c.583T>C__p.Tyr195His	1	0	0	1	0	0	0	0	0	1	0	0	0	0	0	1	0	0	0	0	0	0	0	0	0	1	0	0	1	1	0	0	1	0	0	0	0	0	0	0	0	0.2	0	0	0	0	0	0	0
chr6__29944151__C__G,A__HLA-A__NM_002116_3__missense_variant__c.649C>G__p.Pro217Ala	0	0	0	0	0	0	0	0	0	0	0	0	0	0	0	0	0	0	0	0	0	0	0	0	0	0	0	0	0	0	0	0	0	0	0	0	0	0	0	0	0	0	0	0	0	0	0	0	0
chr6__29944154__A__G__HLA-A__NM_002116_3__missense_variant__c.652A>G__p.Ile218Val	1	0	0	1	0	0	0	0	0	1	0	0	0	0	0	1	0	0	0	0	0	0	0	0	0	0	1	1	0	1	0	0	0	0	0	0	0	0	0	0	0	1	0	0	0	0	0	1	0
chr6__29944193__G__A__HLA-A__NM_002116_3__missense_variant__c.691G>A__p.Gly231Ser	1	0	0	1	0	0	0	0	0	1	0	0	0	0	0	1	0	0	0	0	0	0	0	0	0	0	1	1	0	1	0	0	0	0	0	0	0	0	0	0	0	1	0	0	0	0	0	1	0
chr6__29944193__G__A,C__HLA-A__NM_002116_3__missense_variant__c.691G>A__p.Gly231Ser	0	0	0	0	0	0	0	0	0	0	0	0	0	0	0	0	0	0	0	0	0	0	0	0	0	0	0	0	0	0	0	0	0	0	0	0	0	0	0	0	0	0	0	0	0	0	0	0	0
chr6__29944310__G__T__HLA-A__NM_002116_3__missense_variant__c.808G>T__p.Ala270Ser	0	0	0	1	1	0	0	0	0	1	0	0	0	0	0	1	0	0	0	0	0	0	0	0	0	0	1	1	0	1	0	0	0	0	0	0	0	0	0	0	0	1	0	0	0	0	0	1	0
chr6__29944310__G__T,C__HLA-A__NM_002116_3__missense_variant__c.808G>T__p.Ala270Ser	0	0	0	0	0	0	0	0	0	0	0	0	0	0	0	0	0	0	0	0	0	0	0	0	0	0	0	0	0	0	0	0	0	0	0	0	0	0	0	0	0	0	0	0	0	0	0	0	0
chr6__29944331__G__C__HLA-A__NM_002116_3__missense_variant__c.829G>C__p.Glu277Gln	0	0	0	1	1	0	0	0	0	1	0	0	0	0	0	1	0	0	0	0	0	0	0	0	0	0	1	1	0	1	0	0	0	0	0	0	0	0	0	0	0	1	0	0	0	0	0	1	0
chr6__29944331__G__C,T__HLA-A__NM_002116_3__missense_variant__c.829G>C__p.Glu277Gln	0	0	0	0	0	0	0	0	0	0	0	0	0	0	0	0	0	0	0	0	0	0	0	0	0	0	0	0	0	0	0	0	0	0	0	0	0	0	0	0	0	0	0	0	0	0	0	0	0
chr6__29944503__T__C__HLA-A__NM_002116_3__missense_variant__c.899T>C__p.Leu300Pro	1	0	0	1	1	0	0	0	0	1	0	0	0	0	0	1	0	0	0	0	0	0	0	0	0	0	1	0	0	1	0	0	0	0	0	0	0	0	0	0	0	1	0	0	0	0	0	0	0
chr6__29944556__C__T__HLA-A__NM_002116_3__missense_variant__c.952C>T__p.Leu318Phe	1	0	0	1	1	0	0	0	0	1	0	0	0	0	0	1	0	0	0	0	0	0	0	0	0	0	1	0	0	0	0	0	0	0	0	0	0	0	0	0	0	1	0	0	0	0	0	0	0
chr6__29944571__A__G__HLA-A__NM_002116_3__missense_variant__c.967A>G__p.Thr323Ala	1	0	0	1	1	0	0	0	0	1	0	0	0	0	0	1	0	0	0	0	0	0	0	0	0	0	1	0	0	0	0	0	0	0	0	0	0	0	0	0	0	1	0	0	0	0	0	0	0
chr6__29944596__T__G__HLA-A__NM_002116_3__missense_variant__c.992T>G__p.Met331Arg	1	0	0	1	1	0	0	0	0	1	0	0	0	0	0	1	0	0	0	0	0	0	0	0	0	0	1	0	0	0	0	0	0	0	0	0	0	0	0	0	0	1	0	0	0	0	0	0	0
chr6__29945079__A__T__HLA-A__NM_002116_3__missense_variant__c.1051A>T__p.Thr351Ser	1	0	0	1	1	0	0	0	0	1	0	0	0	0	0	1	0	0	0	0	0	0	0	0	0	0	1	0	0	0	0	0	0	0	0	0	0	0	0	0	0	1	0	0	0	0	0	0	0
chr6__29945260__G__A__HLA-A__NM_002116_3__missense_variant__c.1090G>A__p.Val364Met	1	0	0	0	1	0	0	0	1	1	0	0	0	0	0	1	0	0	0	0	1	0	0	0	0	0	1	0	0	0	0	0	0	0	0	0	0	0	0	0	0	1	0	0	1	0	0	0	0
chr6__30490287__G__A__HLA-E__NM_005516_6__missense_variant__c.382G>A__p.Gly128Arg	0	0	0	1	0	0	0	0	0	0	0	0	0	0	0	1	0	0	0	0	1	0	1	0	0	0	0	0	0	1	0	0	0	0	0	0	0	0	1	0	1	1	0	0	0	1	0	1	0
chr6__30744028__C__G__IER3__NM_003897__missense_variant__c.379G>C__p.Ala127Pro	0	0	0	0	0	0	0	1	0	0	0	0	0	0	0	1	0	0	0	0	0	0	0	0	0	0	1	0	0	0	0	0	0	0	0	0	1	0	0	0	0	1	0	1	1	0	0	0	0
chr6__31269347__T__C__HLA-C__NM_002117__missense_variant__c.1105A>G__p.Thr369Ala	1	0	0	0	1	0	0	0	0	1	0	0	0	0	0	1	0	0	0	0	0	0	0	0	0	1	1	0	1	1	1	0	0	1	1	1	0	0	0	0	1	1	0	0	1	1	0	0	0
chr6__31269347__T__C__HLA-C__NovelIsoform__missense_variant__c.1105A>G__p.Thr369Ala	0	0	0	0	0	0	0	0	0	0	1	0	0	0	0	1	0	0	0	0	0	1	0	0	0	1	1	0	0	0	0	0	0	0	0	1	1	0	1	0	1	0	0	0	0	0	0	0	0
chr6__31269385__C__G__HLA-C__NM_002117__missense_variant&splice_region_variant__c.1067G>C__p.Cys356Ser	1	0	0	0	1	0	0	0	0	0	0	0	0	0	0	1	0	0	0	0	0	0	0	0	0	0	1	0	0	1	1	0	0	1	1	1	0	0	0	0	0	1	0	0	1	1	0	0	0
chr6__31269385__C__G,A__HLA-C__NM_002117__missense_variant&splice_region_variant__c.1067G>C__p.Cys356Ser	0	0	0	0	0	0	0	0	0	0	0	0	0	0	0	0	0	0	0	0	0	0	0	0	0	0	0	0	0	0	0	0	0	0	0	0	0	0	0	0	0	0	0	0	0	0	0	0	0
chr6__31269990__T__C__HLA-C__NovelIsoform__missense_variant__c.991A>G__p.Met331Val	0	0	0	0	0	0	0	0	0	0	1	0	0	0	0	1	0	0	0	0	0	1	0	0	0	1	1	0	0	0	0	0	0	0	0	1	1	0	1	0	1	0	0	0	0	0	0	0	0
chr6__31269990__T__C__HLA-C__NM_002117__missense_variant__c.991A>G__p.Met331Val	1	0	0	0	1	0	0	0	0	0	0	0	0	0	0	1	0	0	0	0	0	1	0	0	0	1	1	1	1	1	1	0	0	1	1	1	0	0	0	0	1	1	0	0	1	1	0	0	0
chr6__31269992__G__A__HLA-C__NovelIsoform__missense_variant__c.989C>T__p.Ala330Val	0	0	0	0	0	0	0	0	0	0	1	0	0	0	0	1	0	0	0	0	0	1	0	0	0	1	1	0	0	0	0	0	0	0	0	1	1	0	1	0	1	0	0	0	0	0	0	0	0
chr6__31269992__G__A__HLA-C__NM_002117__missense_variant__c.989C>T__p.Ala330Val	1	0	0	0	1	0	0	0	0	0	0	0	0	0	0	1	0	0	0	0	0	1	0	0	0	1	1	1	1	1	1	0	0	1	1	1	0	0	0	0	1	1	0	0	1	1	0	0	0
chr6__31269996__T__C__HLA-C__NovelIsoform__missense_variant__c.985A>G__p.Thr329Ala	0	0	0	0	0	0	0	0	0	0	1	0	0	0	0	1	0	0	0	0	0	1	0	0	0	1	1	0	0	0	0	0	0	0	0	1	1	0	1	0	1	0	0	0	0	0	0	0	0
chr6__31269996__T__C__HLA-C__NM_002117__missense_variant__c.985A>G__p.Thr329Ala	1	0	0	0	1	0	0	0	0	0	0	0	0	0	0	1	0	0	0	0	0	1	0	0	0	1	1	1	1	1	1	0	0	1	1	1	0	1	0	0	1	1	0	0	1	1	0	0	0
chr6__31269999__C__T__HLA-C__NovelIsoform__missense_variant__c.982G>A__p.Val328Ile	0	0	0	0	0	0	0	0	0	0	1	0	0	0	0	1	0	0	0	0	0	1	0	0	0	1	1	0	0	0	0	0	0	0	0	1	1	0	1	0	1	0	0	0	0	0	0	0	0
chr6__31270002__C__T__HLA-C__NM_002117__missense_variant__c.979G>A__p.Val327Met	0.333333	0	0	0	0	0	0	0	0	0	0	0	0	0	0	1	0	0	0	0	0	0	0	0	0	1	0.25	0	1	0	1	0	0	1	1	0	0	1	0	0	0	0.888889	0	0	1	1	0	0	0
chr6__31270025__A__G__HLA-C__NovelIsoform__missense_variant__c.956T>C__p.Val319Ala	0	0	0	0	0	0	0	0	0	0	1	0	0	0	0	1	0	0	0	0	0	1	0	0	0	1	1	0	0	0	0	0	0	0	0	1	1	0	1	0	1	0	0	0	0	0	0	0	0
chr6__31270025__A__G__HLA-C__NM_002117__missense_variant__c.956T>C__p.Val319Ala	1	0	0	0	1	0	0	0	0	0	0	0	0	0	0	1	0	0	0	0	0	1	0	0	0	1	1	1	1	1	1	0	0	1	1	0.666667	0	1	0	0	1	1	0	0	1	1	0	0	0
chr6__31270056__T__C__HLA-C__NM_002117__missense_variant__c.925A>G__p.Met309Val	1	0	0	0	1	0	0	0	0	0	0	0	0	0	0	1	0	0	0	0	0	1	0	0	1	1	1	1	1	1	1	0	0	1	0	1	0	1	0	0	1	1	0	0	1	1	0	0	0
chr6__31270210__C__T__HLA-C__NM_002117__missense_variant&splice_region_variant__c.895G>A__p.Glu299Lys	0.333333	0	0	0	0	0	0	0	0	0	0	0	0	0	0	1	0	0	0	0	0	0	0	0	0	1	0.25	0	1	0	0	0	0	1	0	0	0	1	0	0	0	0.5	0	0	1	0	0	0	0
chr6__31270214__G__T__HLA-C__NM_002117__missense_variant__c.891C>A__p.Ser297Arg	1	0	0	0	1	0	0	0	0	0	0	0	0	0	0	1	0	0	0	0	0	1	0	0	1	1	1	1	1	1	0	0	0	1	0	1	0	1	0	0	1	1	0	0	1	0	0	0	0
chr6__31270232__T__C__HLA-C__NM_002117__missense_variant__c.763A>G__p.Arg255Gly	0.333333	0	0	0	0	0	0	0	0	0	0	0	0	0	0	1	0	0	0	0	0	0	0	0	0	1	0.25	0	1	0	0	0	0	1	0	0	0	1	0	0	0	0.5	0	0	1	0	0	0	0
chr6__31270233__T__G__HLA-C__NM_002117__missense_variant__c.872A>C__p.Gln291Pro	1	0	0	0	1	0	0	0	0	0	0	0	0	0	0	1	0	0	0	0	0	1	0	0	1	1	1	1	1	1	0	0	0	1	0	1	0	1	0	0	1	1	0	0	1	0	0	0	0
chr6__31270233__T__G,A,C__HLA-C__NM_002117__missense_variant__c.872A>C__p.Gln291Pro	0	0	0	0	0	0	0	0	0	0	0	0	0	0	0	0	0	0	0	0	0	0	0	0	0	0	0	0	0	0	0	0	0	0	0	0	0	0	0	0	0	0	0	0	0	0	0	0	0
chr6__31270233__T__G,C,A__HLA-C__NM_002117__missense_variant__c.872A>C__p.Gln291Pro	0	0	0	0	0	0	0	0	0	0	0	0	0	0	0	0	0	0	0	0	0	0	0	0	0	0	0	0	0	0	0	0	0	0	0	0	0	0	0	0	0	0	0	0	0	0	0	0	0
chr6__31270250__C__A__HLA-C__NM_002117__missense_variant__c.855G>T__p.Met285Ile	0.333333	0	0	0	0	0	0	0	0	0	0	0	0	0	0	1	0	0	0	0	0	0	0	0	0	1	0.333333	0	1	0	0	0	0	1	0	0	0	1	0	0	0	0.5	0	0	1	0	0	0	0
chr6__31270252__T__C__HLA-C__NM_002117__missense_variant__c.853A>G__p.Met285Val	1	0	0	0	1	1	0	0	0	0	0	0	0	0	0	1	0	0	0	0	0	1	0	0	1	1	1	1	1	1	0	0	0	1	0	1	0	1	0	0	1	1	0	0	1	0	0	0	0
chr6__31270276__G__C__HLA-C__NM_002117__missense_variant__c.829C>G__p.Gln277Glu	1	0	0	0	1	1	0	1	0	0	0	0	0	0	0	1	0	0	0	0	0	1	0	0	0	1	1	1	0	1	0	0	0	1	0	1	0	0	0	0	1	1	0	0	1	0	0	0	0
chr6__31270453__G__C,T__HLA-C__NM_002117__missense_variant__c.652C>G__p.Leu218Val	0	0	0	0	0	0	0	0	0	0	0	0	0	0	0	0	0	0	0	0	0	0	0	0	0	0	0	0	0	0	0	0	0	0	0	0	0	0	0	0	0	0	0	0	0	0	0	0	0
chr6__31270482__G__T__HLA-C__NM_002117__missense_variant__c.623C>A__p.Pro208His	1	1	0	0	1	1	0	1	0	0	0	0	0	0	0	1	0	0	0	0	0	1	0	0	1	1	1	1	0	1	0	0	0	1	0	1	1	1	1	0	1	1	0	0	0	0	1	0	0
chr6__31271153__A__C,T__HLA-C__NM_002117__missense_variant__c.539T>G__p.Leu180Arg	1	1	0	0	1	1	0	1	0	0	0	0	0	0	0	1	0	0	0	0	0	1	0	0	1	1	1	0	0	1	0	0	0	1	0	1	1	1	1	0	1	1	0	0	1	0	1	0	0
chr6__31271153__A__C,T__HLA-C__NovelIsoform__missense_variant__c.539T>G__p.Leu180Arg	0	0	0	0	0	0	0	0	0	1	0	0	1	0	0	0	0	0	0	0	0	1	1	0	0	0	1	0	0	0	0	0	0	0	0	0	0	0	0	0	0	0	0	0	0	0	0	0	0
chr6__31271165__G__T,A__HLA-C__NovelIsoform__missense_variant__c.527C>T__p.Ala176Val	0	0	0	0	0	0	0	0	0	1	0	0	1	0	0	0	0	0	0	0	0	1	1	0	0	0	1	0	0	0	0	0	0	0	0	0	0	0	0	0	0	0	0	0	0	0	0	0	0
chr6__31271165__G__T,A__HLA-C__NM_002117__missense_variant__c.527C>T__p.Ala176Val	1	1	0	0	1	1	0	1	0	0	0	0	0	0	0	1	0	0	0	0	0	1	0	0	1	1	1	1	0	1	0	0	0	1	0	1	1	1	1	0	1	1	0	0	1	0	1	0	0
chr6__31271165__G__T,A,C__HLA-C__NM_002117__missense_variant__c.527C>T__p.Ala176Val	0	0	0	0	0	0	0	0	0	0	0	0	0	0	0	0	0	0	0	0	0	0	0	0	0	0	0	0	0	0	0	0	0	0	0	0	0	0	0	0	0	0	0	0	0	0	0	0	0
chr6__31271180__A__C,T__HLA-C__NM_002117__missense_variant__c.512T>G__p.Leu171Trp	0	1	0	0	1	1	0	1	0	0	0	0	0	0	0	0	0	0	0	0	0	1	0	0	0	1	1	0	0	1	0	0	0	1	0	1	1	0	0	0	1	1	0	0	1	0	0	0	0
chr6__31271180__A__C,T__HLA-C__NovelIsoform__missense_variant__c.512T>G__p.Leu171Trp	0	0	0	0	0	0	0	0	0	0	0	0	1	0	0	0	0	0	0	0	0	0	0	0	0	0	0	0	0	0	0	0	0	0	0	0	0	0	0	0	0	0	0	0	0	0	0	0	0
chr6__31271273__G__A,T__HLA-C__NovelIsoform__missense_variant__c.419C>T__p.Ser140Phe	0	0	0	0	0	0	0	0	0	1	0	0	1	0	0	0	0	0	0	0	0	1	1	0	0	0	1	0	0	1	0	0	0	0	0	0	0	0	0	0	0	0	0	0	0	0	0	0	0
chr6__31271273__G__A,T__HLA-C__NM_002117__missense_variant__c.419C>T__p.Ser140Phe	1	1	0	1	1	1	0	1	0	0	0	0	0	0	0	1	0	0	0	0	0	1	0	0	1	1	1	0	0	1	0	0	0	0	0	1	1	1	1	0	1	1	0	0	1	0	1	0	0
chr6__31271280__C__T__HLA-C__NM_002117__missense_variant__c.412G>A__p.Asp138Asn	1	1	0	1	1	1	0	1	0	0	0	0	0	0	0	1	0	0	0	0	0	1	0	0	1	1	1	1	0	1	0	0	0	0	0	1	1	1	1	0	1	1	0	0	1	0	1	0	0
chr6__31271280__C__T,G__HLA-C__NM_002117__missense_variant__c.412G>A__p.Asp138Asn	0	0	0	0	0	0	0	0	0	0	0	0	0	0	0	0	0	0	0	0	0	0	0	0	0	0	0	0	0	0	0	0	0	0	0	0	0	0	0	0	0	0	0	0	0	0	0	0	0
chr6__31271324__G__T,A__HLA-C__NM_002117__missense_variant__c.368C>T__p.Ser123Phe	1	1	0	1	1	1	0	1	0	0	0	0	0	0	0	1	0	0	0	0	0	1	0	0	1	1	1	0	0	1	0	0	0	0	0	1	1	1	1	0	1	1	0	0	1	0	1	0	0
chr6__31271324__G__A,T__HLA-C__NM_002117__missense_variant__c.368C>T__p.Ser123Phe	0	0	0	0	0	0	0	0	0	0	0	0	0	0	0	1	0	0	0	0	0	0	0	0	0	0	1	1	0	0	0	0	0	0	0	0	0	0	0	0	0	0	0	0	0	0	0	0	0
chr6__31271630__G__T__HLA-C__NovelIsoform__missense_variant__c.312C>A__p.Asn104Lys	0	0	0	0	0	0	0	0	0	1	0	0	1	0	0	0	0	0	0	0	0	1	1	0	0	0	1	0	0	0	0	0	0	0	0	0	0	0	0	0	0	0	0	0	0	0	0	0	0
chr6__31271630__G__T__HLA-C__NM_002117__missense_variant__c.312C>A__p.Asn104Lys	1	1	0	1	1	1	0	1	0	0	0	0	0	0	0	1	0	0	0	0	0	1	0	0	1	1	1	1	0	1	0	0	0	0	0	1	1	1	1	0	1	1	0	0	1	0	1	0	0
chr6__31271640__C__T__HLA-C__NovelIsoform__missense_variant__c.302G>A__p.Ser101Asn	0	0	0	0	0	0	0	0	0	1	0	0	1	0	0	0	0	0	0	0	0	1	1	0	0	0	1	0	0	0	0	0	0	0	0	0	0	0	0	0	0	0	0	0	0	0	0	0	0
chr6__31271640__C__T__HLA-C__NM_002117__missense_variant__c.302G>A__p.Ser101Asn	1	1	0	1	1	1	0	1	0	0	0	0	0	0	0	1	0	0	0	0	0	1	0	0	1	1	1	1	0	1	0	0	0	0	0	1	1	1	1	0	1	1	0	0	1	0	1	0	0
chr6__31271724__G__T__HLA-C__NM_002117__missense_variant__c.218C>A__p.Ala73Glu	0.333333	1	0	1	0	0.5	0	0	0	0	0	0	0	0	0	0.333333	0	0	0	0	0	0	0	0	0.333333	1	0.5	0	0	1	0	0	0	0	0	0.25	0	1	0	0	0	0.666667	0	0	1	1	0	0	0
chr6__31271800__A__C,T__HLA-C__NM_002117__missense_variant__c.142T>G__p.Ser48Ala	0	1	0	1	1	1	0	1	0	0	0	0	0	0	0	0	0	0	0	0	0	1	0	0	1	1	1	0	0	0	0	0	0	0	0	1	1	0	0	0	1	1	0	0	1	1	0	0	0
chr6__31271800__A__C,T__HLA-C__NovelIsoform__missense_variant__c.142T>G__p.Ser48Ala	0	0	0	0	0	0	0	0	0	0	0	0	1	0	0	0	0	0	0	0	0	0	0	0	0	0	0	0	0	0	0	0	0	0	0	0	0	0	0	0	0	0	0	0	0	0	0	0	0
chr6__31271830__G__A__HLA-C__NM_002117__missense_variant__c.112C>T__p.Arg38Trp	0.333333	1	0	1	0	0.5	0	0	0	0	0	0	0	0	0	0.333333	0	0	0	0	0	0	0	0	0.5	1	0.5	0	0	0	0	0	0	0	0	0.25	0	1	0	0	0	0.666667	0	0	1	1	0	0	0
chr6__31271844__T__G__HLA-C__NM_002117__missense_variant__c.98A>C__p.Asp33Ala	0.333333	1	0	1	0	0.5	0	0	0	0	0	0	0	0	0	0.333333	0	0	0	0	0	0	0	0	0.5	1	0.5	0	0	0	0	0	0	0	0	0.25	0	1	0	0	0	0.666667	0	0	1	1	0	0	0
chr6__31271845__C__A__HLA-C__NovelIsoform__missense_variant__c.97G>T__p.Asp33Tyr	0	0	0	0	0	0	0	0	0	0	0	0	1	0	0	0	0	0	0	0	0	1	1	0	0	0	1	0	0	0	0	0	0	0	0	0	0	0	0	0	0	0	0	0	0	0	0	0	0
chr6__31271845__C__A__HLA-C__NM_002117__missense_variant__c.97G>T__p.Asp33Tyr	1	1	0	1	1	1	0	1	0	0	0	0	0	0	0	1	0	0	0	0	0	1	0	0	1	1	1	1	0	0	0	0	0	0	0	1	1	1	1	0	1	1	0	0	1	1	1	0	0
chr6__31272025__C__G,A__HLA-C__NM_002117__missense_variant__c.47G>C__p.Gly16Ala	1	0	0	0	0	1	0	0	0	0	0	0	0	0	0	1	0	0	0	0	0	0	0	0	1	1	0	0	0	0	0	0	0	0	0	1	0	1	1	0	1	1	0	0	0	0	1	0	0
chr6__31272025__C__G__HLA-C__NM_002117__missense_variant__c.47G>C__p.Gly16Ala	0	1	0	1	1	1	0	1	0	0	0	0	0	0	0	1	0	0	0	0	0	1	0	0	1	1	1	1	0	0	0	0	0	0	0	1	1	0	0	0	1	1	0	0	1	1	0	0	0
chr6__31272044__G__T__HLA-C__NM_002117__missense_variant__c.28C>A__p.Leu10Ile	1	1	0	1	1	1	0	1	0	0	0	0	0	0	0	1	0	0	0	0	0	1	0	0	1	1	1	1	0	0	0	0	0	0	0	1	1	1	1	0	1	1	0	0	1	1	1	0	0
chr6__31272044__G__T__HLA-C__NovelIsoform__missense_variant__c.28C>A__p.Leu10Ile	0	0	0	0	0	0	0	0	0	0	0	0	1	0	0	0	0	0	0	0	0	1	0	0	0	0	1	0	0	0	0	0	0	0	0	0	0	0	0	0	0	0	0	0	0	0	0	0	0
chr6__31272050__C__T__HLA-C__NM_002117__missense_variant__c.22G>A__p.Ala8Thr	1	1	0	1	1	1	0	1	0	0	0	0	0	0	0	1	0	0	0	0	0	1	0	0	1	1	1	1	0	0	0	0	0	0	0	1	1	1	1	0	1	1	0	0	1	1	1	0	0
chr6__31272050__C__T__HLA-C__NovelIsoform__missense_variant__c.22G>A__p.Ala8Thr	0	0	0	0	0	0	0	0	0	0	0	0	1	0	0	0	0	0	0	0	0	1	0	0	0	0	1	0	0	0	0	0	0	0	0	0	0	0	0	0	0	0	0	0	0	0	0	0	0
chr6__31355544__G__A__HLA-B__NM_005514_2__missense_variant__c.668C>T__p.Ala223Val	0	0	0	0	0	0	0	0	0	1	0	0	0	0	0	0	0	0	0	0	0	0.666667	1	0	1	0	1	0	1	1	0	0	0	0	0	0	0	0	0	0	0	1	0	0	0	0.5	0	1	0
chr6__31356176__C__G,A__HLA-B__NM_005514_2__missense_variant__c.610G>C__p.Glu204Gln	0	0	0	0	0	0	0	0	0	0	0	0	0	0	0	0	0	0	0	0	0	0	0	0	0	0	0	0	0	0	0	0	0	0	0	0	0	0	0	0	0	0	0	0	0	0	0	0	0
chr6__31356181__T__G,A__HLA-B__NM_005514_2__missense_variant__c.605A>C__p.Lys202Thr	0	0	0	0	0	0	0	0	0	0	0	0	0	0	0	0	0	0	0	0	0	0	0	0	0	0	0	0	0	0	0	0	0	0	0	0	0	0	0	0	0	0	0	0	0	0	0	0	0
chr6__31356183__G__C__HLA-B__NM_005514_2__missense_variant__c.603C>G__p.Asp201Glu	0	0	0	0	0	0	0	0	0	1	0	0	0	0	0	0	0	0	0	0	0	1	1	0	1	0	1	0	1	1	0	0	0	0	1	0	0	0	0	0	1	1	0	0	0	1	0	1	0
chr6__31356183__G__C,T__HLA-B__NM_005514_2__missense_variant__c.603C>G__p.Asp201Glu	0	0	0	0	0	0	0	0	0	0	0	0	0	0	0	0	0	0	0	0	0	0	0	0	0	0	0	0	0	0	0	0	0	0	0	0	0	0	0	0	0	0	0	0	0	0	0	0	0
chr6__31356226__T__A,G__HLA-B__NM_005514_2__missense_variant__c.560A>T__p.Glu187Val	0	0	0	0	0	0	0	0	0	1	0	0	0	0	0	0	0	0	0	0	0	1	0	0	1	0	1	0	0	0	0	0	0	0	0	0	0	0	0	0	0	1	0	0	0	1	0	1	0
chr6__31356227__C__G,T__HLA-B__NM_005514_2__missense_variant__c.559G>C__p.Glu187Gln	0	0	0	0	0	0	0	0	0	1	0	0	0	0	0	0	0	0	0	0	0	1	1	0	1	0	1	0	0	1	0	0	0	0	1	0	0	0	0	0	1	1	0	0	0	1	0	1	0
chr6__31356227__C__G,T,A__HLA-B__NM_005514_2__missense_variant__c.559G>C__p.Glu187Gln	0	0	0	0	0	0	0	0	0	0	0	0	0	0	0	0	0	0	0	0	0	0	0	0	0	0	0	0	0	0	0	0	0	0	0	0	0	0	0	0	0	0	0	0	0	0	0	0	0
chr6__31356247__C__T,A__HLA-B__NM_005514_2__missense_variant__c.539G>T__p.Arg180Leu	0	0	0	0	0	0	0	0	0	1	0	0	0	0	0	0	0	0	0	0	0	1	1	0	1	0	1	0	1	1	0	0	0	0	1	0	0	0	0	0	1	1	0	0	0	1	0	1	0
chr6__31356247__C__T,A,G__HLA-B__NM_005514_2__missense_variant__c.539G>T__p.Arg180Leu	0	0	0	0	0	0	0	0	0	0	0	0	0	0	0	0	0	0	0	0	0	0	0	0	0	0	0	0	0	0	0	0	0	0	0	0	0	0	0	0	0	0	0	0	0	0	0	0	0
chr6__31356248__G__C__HLA-B__NM_005514_2__missense_variant__c.538C>G__p.Arg180Gly	0	0	0	0	0	0	0	0	0	1	0	0	0	0	0	0	0	0	0	0	0	0.666667	1	0	1	0	1	0	1	1	0	0	0	0	0	0	0	0	0	0	0	1	0	0	0	0.5	0	1	0
chr6__31356259__T__A__HLA-B__NM_005514_2__missense_variant__c.527A>T__p.Glu176Val	0	0	0	0	0	0	0	0	0	1	0	0	0	0	0	0	0	0	0	0	0	1	1	0	1	0	1	0	1	1	0	0	0	0	1	0	0	0	0	0	1	1	0	0	0	1	0	1	0
chr6__31356259__T__A,G__HLA-B__NM_005514_2__missense_variant__c.527A>T__p.Glu176Val	0	0	0	0	0	0	0	0	0	0	0	0	0	0	0	0	0	0	0	0	0	0	0	0	0	0	0	0	0	0	0	0	0	0	0	0	0	0	0	0	0	0	0	0	0	0	0	0	0
chr6__31356323__G__T__HLA-B__NM_005514_2__missense_variant__c.463C>T__p.Arg155Cys	0	0	0	0	0	0	0	0	0	1	0	0	0	0	0	0	0	0	0	0	0	1	1	0	1	0	1	0	0	1	0	0	0	0	1	0	0	0	0	0	1	1	0	0	0	1	0	1	0
chr6__31356323__G__T,C__HLA-B__NM_005514_2__missense_variant__c.463C>T__p.Arg155Cys	0	0	0	0	0	0	0	0	0	0	0	0	0	0	0	0	0	0	0	0	0	0	0	0	0	0	0	0	0	0	0	0	0	0	0	0	0	0	0	0	0	0	0	0	0	0	0	0	0
chr6__31356368__A__C,T__HLA-B__NM_005514_2__missense_variant__c.418T>G__p.Tyr140Asp	0	0	0	0	0	0	0	0	0	0	0	0	0	0	0	0	0	0	0	0	0	0	0	0	0	0	0	0	0	0	0	0	0	0	0	0	0	0	0	0	0	0	0	0	0	0	0	0	0
chr6__31356377__G__A__HLA-B__NM_005514_2__missense_variant__c.409C>T__p.His137Tyr	0	0	0	0	0	0	0	0	0	1	0	0	0	0	0	0	0	0	0	0	0	0.666667	0	0	1	0	1	0	0	1	0	0	0	0	0	0	0	0	0	0	0	1	0	0	0	0.5	0	1	0
chr6__31356423__G__C__HLA-B__NM_005514_2__missense_variant__c.363C>G__p.Ser121Arg	0	0	0	0	0	0	0	0	0	1	0	0	0	0	0	0	0	0	0	0	0	1	0	0	1	0	1	0	0	1	0	0	0	0	0	0	0	0	0	0	1	1	0	0	0	1	0	1	0
chr6__31356431__G__T__HLA-B__NM_005514_2__missense_variant__c.355C>A__p.Leu119Ile	0	0	0	0	0	0	0	0	0	1	0	0	0	0	0	0	0	0	0	0	0	1	0	0	1	0	1	0	0	1	0	0	0	0	0	0	0	0	0	0	1	1	0	0	0	1	0	1	0
chr6__31356433__G__A__HLA-B__NM_005514_2__missense_variant__c.353C>T__p.Thr118Ile	0	0	0	0	0	0	0	0	0	1	0	0	0	0	0	0	0	0	0	0	0	1	0	0	1	0	1	0	0	1	0	0	0	0	0	0	0	0	0	0	1	0	0	0	0	1	0	1	0
chr6__31356739__C__A__HLA-B__NM_005514_2__missense_variant__c.292G>T__p.Asp98Tyr	0	0	0	0	0	0	0	0	0	1	0	0	0	0	0	0	0	0	0	0	0	1	0	0	1	0	1	0	0	1	0	0	0	0	0	0	0	0	0	0	0	0	0	0	0	1	0	1	0
chr6__31356739__C__A,G__HLA-B__NM_005514_2__missense_variant__c.292G>T__p.Asp98Tyr	0	0	0	0	0	0	0	0	0	0	0	0	0	0	0	0	0	0	0	0	0	0	0	0	0	0	0	0	0	0	0	0	0	0	0	0	0	0	0	0	0	0	0	0	0	0	0	0	0
chr6__31356748__C__T,G__HLA-B__NM_005514_2__missense_variant__c.283G>A__p.Ala95Thr	0	0	0	0	0	0	0	0	0	0	0	0	0	0	0	0	0	0	0	0	0	0	0	0	0	0	0	0	0	0	0	0	0	0	0	0	0	0	0	0	0	0	0	0	0	0	0	0	0
chr6__31356748__C__T,A,G__HLA-B__NM_005514_2__missense_variant__c.283G>A__p.Ala95Thr	0	0	0	0	0	0	0	0	0	0	0	0	0	0	0	0	0	0	0	0	0	0	0	0	0	0	0	0	0	0	0	0	0	0	0	0	0	0	0	0	0	0	0	0	0	0	0	0	0
chr6__31356749__C__G__HLA-B__NM_005514_2__missense_variant__c.282G>C__p.Gln94His	0	0	0	0	0	0	0	0	0	0	0	0	0	0	0	0	0	0	0	0	0	1	0	0	1	0	0	0	0	1	0	0	0	0	0	0	0	0	0	0	0	0	0	0	0	0	0	1	0
chr6__31356751__G__T__HLA-B__NM_005514_2__missense_variant__c.280C>A__p.Gln94Lys	0	0	0	0	0	0	0	0	0	1	0	0	0	0	0	0	0	0	0	0	0	1	0	0	1	0	1	0	0	1	0	0	0	0	0	0	0	0	0	0	0	0	0	0	0	1	0	1	0
chr6__31356754__C__T,G__HLA-B__NM_005514_2__missense_variant__c.277G>A__p.Ala93Thr	0	0	0	0	0	0	0	0	0	1	0	0	0	0	0	0	0	0	0	0	0	1	0	0	0	0	1	0	0	0	0	0	0	0	0	0	0	0	0	0	0	0	0	0	0	1	0	1	0
chr6__31356759__T__G,A__HLA-B__NM_005514_2__missense_variant__c.272A>T__p.Tyr91Phe	0	0	0	0	0	0	0	0	0	1	0	0	0	0	0	0	0	0	0	0	0	1	0	0	1	0	1	0	0	1	0	0	0	0	0	0	0	0	0	0	0	0	0	0	0	1	0	1	0
chr6__31356770__G__C__HLA-B__NM_005514_2__missense_variant__c.261C>G__p.Asn87Lys	0	0	0	0	0	0	0	0	0	1	0	0	0	0	0	0	0	0	0	0	0	0.666667	0	0	1	0	1	0	0	1	0	0	0	0	0	0	0	0	0	0	0	0	0	0	0	1	0	1	0
chr6__31356772__T__C__HLA-B__NM_005514_2__missense_variant__c.259A>G__p.Asn87Asp	0	0	0	0	0	0	0	0	0	1	0	0	0	0	0	0	0	0	0	0	0	0.666667	0	0	1	0	1	0	0	1	0	0	0	0	0	0	0	0	0	0	0	0	0	0	0	1	0	1	0
chr6__31356826__C__T__HLA-B__NM_005514_2__missense_variant__c.205G>A__p.Glu69Lys	0	0	0	0	0	0	0	0	0	1	0	0	0	0	0	0	0	0	0	0	0	0.666667	0	0	1	0	1	0	0	1	0	0	0	0	0	0	0	0	0	0	0	0	0	0	0	1	0	1	0
chr6__31356838__C__T__HLA-B__NM_005514_2__missense_variant__c.193G>A__p.Ala65Thr	0	0	0	0	0	0	0	0	0	1	0	0	0	0	0	0	0	0	0	0	0	0.666667	0	0	1	0	1	0	0	1	0	0	0	0	0	0	0	0	0	0	0	0	0	0	0	1	0	1	0
chr6__31356864__T__A__HLA-B__NM_005514_2__missense_variant__c.167A>T__p.Gln56Leu	0	0	0	0	0	0	0	0	0	1	0	0	0	0	0	0	0	0	0	0	0	0.666667	0	0	1	0	1	0	0	1	0	0	0	0	0	0	0	0	0	0	0	0	0	0	0	1	0	1	0
chr6__31356889__A__T,C__HLA-B__NM_005514_2__missense_variant__c.142T>G__p.Ser48Ala	0	0	0	0	0	0	0	0	0	1	0	0	0	0	0	0	0	0	0	0	0	0.666667	0	0	1	0	1	0	0	1	0	0	0	0	0	0	0	0	0	0	0	0	0	0	0	1	0	1	0
chr6__31356925__C__T__HLA-B__NM_005514_2__missense_variant__c.106G>A__p.Val36Met	0	0	0	0	0	0	0	0	0	1	0	0	0	0	0	0	0	0	0	0	0	1	0	0	1	0	1	0	0	1	0	0	0	0	0	0	0	0	0	0	0	0	0	0	0	1	0	1	0
chr6__31356928__A__C,T__HLA-B__NM_005514_2__missense_variant__c.103T>G__p.Ser35Ala	0	0	0	0	0	0	0	0	0	1	0	0	0	0	0	0	0	0	0	0	0	0	0	0	0	0	1	0	0	0	0	0	0	0	0	0	0	0	0	0	0	0	0	0	0	1	0	1	0
chr6__31357110__G__C,T__HLA-B__NM_005514_2__missense_variant__c.49C>G__p.Leu17Val	0	0	0	0	0	0	0	0	0	1	0	0	0	0	0	0	0	0	0	0	0	0	0	0	0	0	1	0	0	0	0	0	0	0	0	0	0	0	0	0	0	0	0	0	0	1	0	1	0
chr6__31357115__G__C__HLA-B__NM_005514_2__missense_variant__c.44C>G__p.Ala15Gly	0	0	0	0	0	0	0	0	0	1	0	0	0	0	0	0	0	0	0	0	0	1	0	0	1	0	1	0	0	1	0	0	0	0	0	0	0	0	0	0	0	0	0	0	0	1	0	1	0
chr6__31357115__G__C,T__HLA-B__NM_005514_2__missense_variant__c.44C>G__p.Ala15Gly	0	0	0	0	0	0	0	0	0	0	0	0	0	0	0	0	0	0	0	0	0	0	0	0	0	0	0	0	0	0	0	0	0	0	0	0	0	0	0	0	0	0	0	0	0	0	0	0	0
chr6__31357118__G__C__HLA-B__NM_005514_2__missense_variant__c.41C>G__p.Ser14Trp	0	0	0	0	0	0	0	0	0	1	0	0	0	0	0	0	0	0	0	0	0	1	0	0	1	0	1	0	0	1	0	0	0	0	0	0	0	0	0	0	0	0	0	0	0	1	0	1	0
chr6__31357118__G__C,T__HLA-B__NM_005514_2__missense_variant__c.41C>G__p.Ser14Trp	0	0	0	0	0	0	0	0	0	0	0	0	0	0	0	0	0	0	0	0	0	0	0	0	0	0	0	0	0	0	0	0	0	0	0	0	0	0	0	0	0	0	0	0	0	0	0	0	0
chr6__31357134__C__G__HLA-B__NM_005514_2__missense_variant__c.25G>C__p.Val9Leu	0	0	0	0	0	0	0	0	0	1	0	0	0	0	0	0	0	0	0	0	0	1	0	0	1	0	1	0	0	1	0	0	0	0	0	0	0	0	0	0	0	0	0	0	0	1	0	1	0
chr6__31357148__A__G__HLA-B__NM_005514_2__missense_variant__c.11T>C__p.Met4Thr	0	0	0	0	0	0	0	0	0	1	0	0	0	0	0	0	0	0	0	0	0	1	0	0	1	0	1	0	0	1	0	0	0	0	0	0	0	0	0	0	0	0	0	0	0	1	0	1	0
chr6__31357154__A__C__HLA-B__NM_005514_2__missense_variant__c.5T>G__p.Leu2Arg	0	0	0	0	0	0	0	0	0	0	0	0	0	0	0	0	0	0	0	0	0	1	0	0	1	0	0	0	0	1	0	0	0	0	0	0	0	0	0	0	0	0	0	0	0	0	0	1	0
chr6__31357154__A__C,T__HLA-B__NM_005514_2__missense_variant__c.5T>G__p.Leu2Arg	0	0	0	0	0	0	0	0	0	1	0	0	0	0	0	0	0	0	0	0	0	0	0	0	0	0	1	0	0	0	0	0	0	0	0	0	0	0	0	0	0	0	0	0	0	1	0	1	0
chr6__32443869__T__G__HLA-DRA__NM_019111_5__missense_variant__c.724T>G__p.Leu242Val	0	0	0	1	0	0	0	0	0	0	0	0	0	0	0	0	0	0	0	0	0	0	0	0	1	1	0	0	0	1	0	1	0	0	0	0	1	0	1	0	1	0	0	0	0	0	0	0	0
chr6__32443869__T__G,A__HLA-DRA__NM_019111_5__missense_variant__c.724T>G__p.Leu242Val	0	0	0	1	0	0	0	0	0	0	0	0	0	0	0	0	0	0	0	0	0	0	0	0	0	1	0	0	0	0	0	0	0	0	0	0	0	0	0	0	0	0	0	1	0	0	0	0	0
chr6__32581698__T__C__HLA-DRB1__NM_002124__missense_variant__c.511A>T__p.Met171Leu	0	1	0	1	0	0	0	0	1	0	0	0	0	0	0	0	0	0	0	0	0	0	0	0	0	0.952381	1	0	0	0	0	0	0	0	0	0	1	0	0	0	1	1	0	0	0	0	0	0	1
chr6__32581698__T__C,A__HLA-DRB1__NM_002124__missense_variant__c.511A>T__p.Met171Leu	0	0	0	0	0	0	0	0	0	0	0	0	0	0	0	0	0	0	0	0	0	0	0	0	0	0	0	0	0	0	0	0	0	0	0	0	0	0	0	0	0	0	0	0	0	0	0	0	0
chr6__32581724__A__C,T__HLA-DRB1__NM_002124__missense_variant__c.485T>G__p.Leu162Arg	0	0	0	0	0	0	0	0	0	0	0	0	0	0	0	0	0	0	0	0	0	0	0	0	0	0	0	0	0	0	0	0	0	0	0	0	0	0	0	0	0	0	0	0	0	0	0	0	0
chr6__32584135__A__C,T__HLA-DRB1__NM_002124__missense_variant__c.344T>G__p.Val115Gly	0	1	0	0	0	0	0	0	0	0	0	0	0	0	0	0	0	0	0	0	0	0	0	0	0	1	1	0	0	0	0	0	0	0	0	0	0	0	0	0	1	0	0	0	0	0	0	0	1
chr6__32584193__T__A,G__HLA-DRB1__NM_002124__missense_variant__c.286A>T__p.Ile96Phe	0	1	0	1	0	0	0	0	1	0	0	0	0	0	0	0	0	0	0	0	0	0	0	0	0	1	1	0	0	0	0	0	0	0	0	0	1	0	0	0	1	1	0	0	0	0	0	0	1
chr6__32584193__T__A,G,C__HLA-DRB1__NM_002124__missense_variant__c.286A>T__p.Ile96Phe	0	0	0	0	0	0	0	0	0	0	0	0	0	0	0	0	0	0	0	0	0	0	0	0	0	0	0	0	0	0	0	0	0	0	0	0	0	0	0	0	0	0	0	0	0	0	0	0	0
chr6__32584219__G__T__HLA-DRB1__NM_002124__missense_variant__c.260C>A__p.Ala87Asp	0	0	0	1	0	0	0	0	0	0	0	0	0	0	0	0	0	0	0	0	0	0	0	0	0	0.952381	1	0	0	0	0	0	0	0	0	0	1	0	0	0	0	1	0	0	0	0	0	1	1
chr6__32584282__G__T__HLA-DRB1__NM_002124__missense_variant__c.197C>A__p.Ser66Tyr	0	1	0	1	0	0	0	0	1	0	0	0	0	0	0	0	0	0	0	0	0	0	0	0	0	1	1	0	0	0	0	0	0	0	0	0	1	0	0	0	1	1	0	0	0	0	0	1	1
chr6__32584282__G__T,C__HLA-DRB1__NM_002124__missense_variant__c.197C>A__p.Ser66Tyr	0	0	0	0	0	0	0	0	0	0	0	0	0	0	0	0	0	0	0	0	0	0	0	0	0	0	0	0	0	0	0	0	0	0	0	0	0	0	0	0	0	0	0	0	0	0	0	0	0
chr6__32584353__C__A__HLA-DRB1__NM_002124__missense_variant__c.126G>T__p.Arg42Ser	0	1	0	1	0	0	0	0	1	0	0	0	0	0	0	0	0	0	0	0	0	0	0	0	0	1	1	0	0	0	0	0	0	0	0	0	1	0	0	0	1	1	0	0	0	0	0	1	1
chr6__32584353__C__A,G__HLA-DRB1__NM_002124__missense_variant__c.126G>T__p.Arg42Ser	0	0	0	0	0	0	0	0	0	0	0	0	0	0	0	0	0	0	0	0	0	0	0	0	0	0	0	0	0	0	0	0	0	0	0	0	0	0	0	0	0	0	0	0	0	0	0	0	0
chr6__32584354__C__G__HLA-DRB1__NM_002124__missense_variant__c.125G>C__p.Arg42Thr	0	1	0	1	0	0	0	0	1	0	0	0	0	0	0	0	0	0	0	0	0	0	0	0	0	1	1	0	0	0	0	0	0	0	0	0	1	0	0	0	1	1	0	0	0	0	0	1	1
chr6__32584354__C__G__HLA-DRB1__NovelIsoform__missense_variant__c.125G>C__p.Arg42Thr	0	0	0	0	0	0	0	1	0	0	0	0	0	0	0	0	0	0	0	0	0	1	1	0	0	1	0	0	0	1	0	0	0	0	0	0	1	0	0	0	0	0	0	0	0	0	0	0	0
chr6__32584355__T__A__HLA-DRB1__NM_002124__missense_variant__c.124A>T__p.Arg42Trp	0	1	0	1	0	0	0	0	1	0	0	0	0	0	0	0	0	0	0	0	0	0	0	0	0	1	1	0	0	0	0	0	0	0	0	0	1	0	0	0	1	1	0	0	0	0	0	1	1
chr6__32584355__T__A__HLA-DRB1__NovelIsoform__missense_variant__c.124A>T__p.Arg42Trp	0	0	0	0	0	0	0	1	0	0	0	0	0	0	0	0	0	0	0	0	0	1	1	0	0	1	0	0	0	1	0	0	0	0	0	0	1	0	0	0	0	0	0	0	0	0	0	0	0
chr6__32584366__C__T__HLA-DRB1__NM_002124__stop_gained__c.113G>A__p.Trp38*	0	1	0	0.666667	0	0	0	0	1	0	0	0	0	0	0	0	0	0	0	0	0	0	0	0	0	1	1	0	0	0	0	0	0	0	0	0	1	0	0	0	1	1	0	0	0	0	0	1	1
chr6__32584366__C__T__HLA-DRB1__NovelIsoform__stop_gained__c.113G>A__p.Trp38*	0	0	0	0	0	0	0	1	0	0	0	0	0	0	0	0	0	0	0	0	0	1	1	0	0	1	0	0	0	1	0	0	0	0	0	0	1	0	0	0	0	0	0	0	0	0	0	0	0
chr6__32584367__A__C__HLA-DRB1__NM_002124__missense_variant__c.112T>G__p.Trp38Gly	0	1	0	1	0	0	0	0	0	0	0	0	0	0	0	0	0	0	0	0	0	0	0	0	0	1	1	0	0	0	0	0	0	0	0	0	0	0	0	0	1	1	0	0	0	0	0	1	1
chr6__32589658__A__C,T__HLA-DRB1__NM_002124__missense_variant__c.85T>G__p.Ser29Ala	0	0	0	0	0	0	0	0	0	0	0	0	0	0	0	0	0	0	0	0	0	0	0	0	0	0	0	0	0	0	0	0	0	0	0	0	0	0	0	0	0	0	0	0	0	0	0	0	0
chr6__32589702__G__A,C__HLA-DRB1__NM_002124__missense_variant__c.41C>T__p.Ala14Val	0	0	0	0	0	0	0	0	0	0	0	0	0	0	0	0	0	0	0	0	0	0	0	0	0	0	0	0	0	0	0	0	0	0	0	0	0	0	0	0	0	0	0	0	0	0	0	0	0
chr6__32589706__T__C__HLA-DRB1__NM_002124__missense_variant__c.37A>T__p.Thr13Ser	0	1	0	1	0	0	0	0	1	0	0	0	0	0	0	0	0	0	0	0	0	0	0	0	0	1	1	0	0	0	0	0	0	0	0	0	1	0	0	0	1	1	0	0	0	0	0	1	1
chr6__32589706__T__C__HLA-DRB1__NovelIsoform__missense_variant__c.37A>T__p.Thr13Ser	0	0	0	0	0	0	0	1	0	0	0	0	0	0	0	0	0	0	0	0	0	1	1	0	0	1	0	0	0	1	0	0	0	0	0	0	1	0	0	0	0	0	0	0	0	0	0	0	0
chr6__32589729__T__C__HLA-DRB1__NM_002124__missense_variant__c.14A>G__p.Lys5Arg	0	0	0	1	0	0	0	0	0	0	0	0	0	0	0	0	0	0	0	0	0	0	0	0	0	0.944444	1	0	0	0	0	0	0	0	0	0	1	0	0	0	0	1	0	0	0	0	0	1	1
chr6__32637480__C__A__HLA-DQA1__NM_002122__missense_variant__c.22C>A__p.Leu8Met	0	0	0	0	0	0	0	0	0	0	0	0	0	0	0	0	0	0	0	0	0	0	0	0	0	1	0	0	0	0	0	0	0	0	0	0	0	0	0	0	1	0	0	0	0	0	0	1	0
chr6__32637489__G__A__HLA-DQA1__NM_002122__missense_variant__c.31G>A__p.Ala11Thr	0	0	0	0	0	0	0	0	0	0	0	0	0	0	0	0	0	0	0	0	0	0	0	0	0	1	0	0	0	0	0	0	0	0	0	0	0	0	0	0	1	0	0	0	0	0	0	1	0
chr6__32641328__G__A__HLA-DQA1__NM_002122__missense_variant__c.101G>A__p.Cys34Tyr	0	0	0	0	0	0	0	0	0	0	0	0	0	0	0	0	0	0	0	0	0	0	0	0	0	1	0	0	0	0	0	0	0	0	0	0	0	0	0	0	1	0	0	0	0	0	0	1	0
chr6__32641349__T__C__HLA-DQA1__NM_002122__missense_variant__c.122T>C__p.Phe41Ser	0	0	0	0	0	0	0	0	0	0	0	0	0	0	0	0	0	0	0	0	0	0	0	0	0	1	0	0	0	0	0	0	0	0	0	0	0	0	0	0	1	0	0	0	0	0	0	1	0
chr6__32641415__A__G__HLA-DQA1__NM_002122__missense_variant__c.188A>G__p.Glu63Gly	0	0	0	0	0	0	0	0	0	0	0	0	0	0	0	0	0	0	0	0	0	0	0	0	0	1	0	0	0	0	0	0	0	0	0	0	0	0	0	0	1	0	0	0	0	0	0	1	0
chr6__32641535__A__C,T__HLA-DQA1__NM_002122__missense_variant__c.308A>C__p.Tyr103Ser	0	0	0	0	0	0	0	0	0	0	0	0	0	0	0	0	0	0	0	0	0	0	0	0	0	0	0	0	0	0	0	0	0	0	0	0	0	0	0	0	0	0	0	0	0	0	0	0	0
chr6__32642029__C__T__HLA-DQA1__NM_002122__missense_variant__c.389C>T__p.Thr130Ile	0	0	0	0	0	0	0	0	0	0	0	0	0	0	0	0	0	0	0	0	0	0	0	0	0	1	0	0	0	0	0	0	0	0	0	0	0	0	0	0	1	0	0	0	0	0	0	1	0
chr6__32642096__G__C__HLA-DQA1__NM_002122__missense_variant__c.456G>C__p.Gln152His	0	0	0	0	0	0	0	0	0	0	0	0	0	0	0	0	0	0	0	0	0	0	0	0	0	1	0	0	0	0	0	0	0	0	0	0	0	0	0	0	1	0	0	0	0	0	0	1	0
chr6__32664812__A__G__HLA-DQB1__NM_002123__missense_variant__c.365T>C__p.Ile122Thr	0	0	0	1	0	0	0	0	0	0	0	0	0	0	0	0	0	0	0	0	0	0	0	0	0	1	0	0	0	0	0	0	0	0	0	0	0	0	0	0	0	0	0	0	0	0	0	0	0
chr6__32664816__C__T__HLA-DQB1__NM_002123__missense_variant__c.361G>A__p.Gly121Arg	0	0	0	1	0	0	0	0	0	0	0	0	0	0	0	0	0	0	0	0	0	0	0	0	0	1	0	0	0	0	0	0	0	0	0	0	0	0	0	0	0	0	0	0	0	0	0	0	0
chr6__32664822__A__G__HLA-DQB1__NM_002123__missense_variant__c.355T>C__p.Phe119Leu	0	0	0	1	0	0	0	0	0	0	0	0	0	0	0	0	0	0	0	0	0	0	0	0	0	1	0	0	0	0	0	0	0	0	0	0	0	0	0	0	0	0	0	0	0	0	0	0	0
chr6__32664828__C__A__HLA-DQB1__NM_002123__missense_variant__c.349G>T__p.Val117Leu	0	0	0	1	0	0	0	0	0	0	0	0	0	0	0	0	0	0	0	0	0	0	0	0	0	1	0	0	0	0	0	0	0	0	0	0	0	0	0	0	0	0	0	0	0	0	0	0	0
chr6__32664873__C__T__HLA-DQB1__NM_002123__missense_variant__c.304G>A__p.Gly102Arg	0	0	0	1	0	0	0	0	0	0	0	0	0	0	0	0	0	0	0	0	0	0	0	0	0	1	0	0	0	0	0	0	0	0	0	0	0	0	0	0	0	0	0	0	0	0	0	0	0
chr6__32664910__A__G__HLA-DQB1__NM_002123__missense_variant__c.267T>G__p.Asp89Glu	0	0	0	1	0	0	0	0	0	0	0	0	0	0	0	0	0	0	0	0	0	0	0	0	0	1	0	0	0	0	0	0	0	0	0	0	0	0	0	0	0	0	0	0	0	0	0	0	0
chr6__32664917__C__G__HLA-DQB1__NM_002123__missense_variant__c.260G>C__p.Arg87Pro	0	0	0	1	0	0	0	0	0	0	0	0	0	0	0	0	0	0	0	0	0	0	0	0	0	1	0	0	0	0	0	0	0	0	0	0	0	0	0	0	0	0	0	0	0	0	0	0	0
chr6__32664947__C__T__HLA-DQB1__NM_002123__missense_variant__c.230G>A__p.Gly77Glu	0	0	0	1	0	0	0	0	0	0	0	0	0	0	0	0	0	0	0	0	0	0	0	0	0	1	0	0	0	0	0	0	0	0	0	0	0	0	0	0	0	0	0	0	0	0	0	0	0
chr6__32665004__A__T__HLA-DQB1__NM_002123__missense_variant__c.173T>A__p.Leu58His	0	0	0	1	0	0	0	0	0	0	0	0	0	0	0	0	0	0	0	0	0	0	0	0	0	1	0	0	0	0	0	0	0	0	0	0	0	0	0	0	0	0	0	0	0	0	0	0	0
chr6__32665005__G__A__HLA-DQB1__NM_002123__missense_variant__c.172C>T__p.Leu58Phe	0	0	0	1	0	0	0	0	0	0	0	0	0	0	0	0	0	0	0	0	0	0	0	0	0	1	0	0	0	0	0	0	0	0	0	0	0	0	0	0	0	0	0	0	0	0	0	0	0
chr6__32665055__A__T__HLA-DQB1__NM_002123__missense_variant__c.122T>A__p.Phe41Tyr	0	0	0	1	0	0	0	0	0	0	0	0	0	0	0	0	0	0	0	0	0	0	0	0	0	1	0	0	0	0	0	0	0	0	0	0	0	0	0	0	0	0	0	0	0	0	0	0	0
chr6__32857313__G__A__PSMB9__NM_002800__missense_variant__c.179G>A__p.Arg60His	1	0	0	0	0	0	0	0	0	0	0	1	0	0	0	0	0	0	0	0	0	0	0	0	0	1	0	0	0	0	1	0	0	0	0	0	0	0	0	0	0	1	0	0	1	0	0	0	0
chr6__52752933__C__G__GSTA2__NM_000846__missense_variant__c.335G>C__p.Ser112Thr	0	0	1	0	1	1	0	1	0	0	0	0	0	0	1	1	0	0	0	1	1	1	1	1	1	0	1	0	1	1	0	1	0	0	0	0	1	1	1	1	1	1	1	0	1	1	0	0	1
chr6__160731208__G__A__PLG__NM_000301__missense_variant__c.1414G>A__p.Asp472Asn	1	1	0	0	0	0	0	0	1	0	1	0	0	0	0	0	0	0	0	0	1	1	0	1	0	0	1	0	0	0	1	1	0	0	0	0	1	0	0	1	1	1	0	1	0	1	1	0	0
chr7__150793288__C__T__TMEM176B__NM_001101312__missense_variant__c.400G>A__p.Ala134Thr	1	0	0	0	1	1	1	0	1	1	1	1	0	0	0	0	0	1	0	1	1	1	1	1	1	0	1	1	1	1	1	1	1	1	1	1	1	0	0	0	1	1	0	1	0	1	1	0	1
chr7__150793996__T__G__TMEM176B__NM_001101312__missense_variant__c.280A>C__p.Ser94Arg	1	0	0	0	1	1	1	0	1	1	1	1	0	0	0	0	0	1	0	1	1	1	1	1	1	0	1	0	1	1	1	1	1	1	1	0	1	0	0	1	1	1	0	1	0	1	1	0	1
chr7__150793996__T__G,A__TMEM176B__NM_001101312__missense_variant__c.280A>C__p.Ser94Arg	1	0	0	0	0	1	0	0	0	0	0	1	0	0	0	0	0	0	0	0	0	1	1	1	0	0	1	1	0	1	1	0	1	0	0	1	1	0	0	0	1	1	0	0	0	0	0	0	1
chr8__17882029__T__C__FGL1__NM_004467__missense_variant__c.214A>G__p.Ile72Val	1	1	1	1	1	0.833333	0	1	1	1	1	0	1	1	1	1	1	1	0	1	1	1	1	1	1	1	1	0	1	1	1	1	0	1	0	1	1	0	0	1	1	1	0	1	1	1	1	1	1
chr8__17882029__T__C,A__FGL1__NM_004467__missense_variant__c.214A>G__p.Ile72Val	0	0	0	0	0	0	0	0	0	0	0	0	0	0	0	0	0	0	0	0	0	0	0	0	0	0	0	0	0	0	0	0	0	0	0	0	0	0	0	0	0	0	0	0	0	0	0	0	0
chr8__17885511__G__A__FGL1__NM_004467__missense_variant__c.44C>T__p.Thr15Ile	1	1	1	0	1	1	0	1	1	1	1	1	1	1	1	1	1	1	0	1	1	1	1	1	1	1	1	0	1	1	1	1	0	1	1	1	1	0	1	1	1	1	0	1	1	1	1	1	1
chr9__114323246__G__A,T__ORM1__NM_000607__missense_variant&splice_region_variant__c.113G>A__p.Arg38Gln	0.551282	0.833333	0	0	0.666667	0.777778	1	0.6	0.8	0.818182	1	0.75	1	0.526316	0.444444	0.666667	0	1	0	1	0.8	0.692308	0.571429	0.538462	0.818182	0.5	0.666667	0	0.666667	0.8	0.666667	0.6	1	0.75	0.75	0.571429	0.823529	0	0.5	1	0.837838	0.65	0.875	0.333333	1	0.777778	0.785714	0.666667	0.666667
chr9__136946091__A__G__C8G__NM_000606__missense_variant__c.353A>G__p.Asp118Gly	1	1	0	0	1	0	0	0	0	1	0	1	1	0	0	0	0	1	0	1	0	1	1	0	0	0	1	0	0	0	1	1	0	0	1	1	1	0	1	0	1	1	0	1	1	1	1	0	1
chr15__40038363__C__T__SRP14__NM_003134__missense_variant__c.129G>T__p.Lys43Asn	1	0	1	1	1	1	0	1	1	0	0	0	1	1	0	0	0	1	0	0	1	1	1	1	1	1	1	0	1	1	1	1	0	0	0	1	1	0	1	0	1	1	0	0	0	1	1	1	1
chr18__9117869__T__C__NDUFV2__NM_021074__missense_variant__c.86T>A__p.Val29Asp	1	0	1	0	0	1	0	0	0	1	0	0	1	1	0	1	0	0	0	0	1	1	1	1	0	1	1	0	1	1	1	1	0	0	1	1	1	1	1	0	1	1	1	1	1	1	1	1	1
chr19__1106616__T__C__GPX4__NM_002085__missense_variant__c.338T>C__p.Leu113Ser	0.25	1	1	0	1	1	0	0	1	0	0	0	1	0.666667	1	0	0	0.5	0	0	0	0.666667	0.666667	1	1	0.5	0.333333	0	0	0	0.75	0.75	0	0	1	0	0	0	1	1	0.5	0.4	0	1	0	0	1	0	0.5
chr19__38831447__T__G__ECH1__NM_001398__missense_variant__c.122A>C__p.Glu41Ala	0	1	0	0	1	1	0	0	0	1	0	0	0	0	0	0	1	0	0	0	0	1	1	1	1	0	1	0	0	0	1	1	0	0	0	0	0	0	0	0	0	1	0	0	0	1	1	0	1
chr19__40875742__A__C,T__CYP2A7__NM_030589__missense_variant__c.1436T>G__p.Val479Gly	1	1	0	0	1	0.777778	0	1	0	1	0	1	0	0	0	0	0	0	0	0	0	1	1	1	1	0	1	0	1	0	0.333333	0	1	0	1	0	1	0	0	0	0.777778	0	0	0	0.25	1	0	0	0
chr19__49490278__C__G__RPL13A__NM_012423__missense_variant__c.125C>G__p.Ala42Gly	1	0	0	1	1	1	1	1	1	1	0	1	1	0	0	1	0	0	0	1	1	1	1	1	0	1	1	1	1	1	1	0	1	0	0	1	1	0	1	0	1	1	1	1	1	1	1	0	1
chr19__49490278__C__G,A__RPL13A__NM_012423__missense_variant__c.125C>G__p.Ala42Gly	1	1	0	1	1	1	0	1	1	1	0	1	1	0	0	0	0	1	0	0	0	1	1	1	1	1	1	1	1	1	1	1	0	0	0	1	1	1	0	0	1	1	0	1	1	1	0	0	1
[truncated: 398 more columns]
