# Supplementary material for: Long-read single-cell sequencing reveals expressions of hypermutation clusters of isoforms in human liver cancer cells
Source: eLife. 2024 Jan 11;12:RP87607. doi: 10.7554/eLife.87607 (PMC10945587; doi:10.7554/eLife.87607)
Supplement: Supplementary file 4. [file elife-87607-supp4.xlsx]

## Sheet: in
Supplemental table 4: Genes with SD>=0.5
Cell	N_AAAGGATGTGTACAGG	N_AACCTTTCAGAAGCGT	N_AACGTCACAGAGACTG	N_AAGACTCAGGGAGAAT	N_AAGCGTTAGGTGCGAT	N_AATGGAAGTATAGGGC	N_AATGGCTTCCCGAACG	N_ACACTGAGTATTCCGA	N_ACACTGATCACTGGTA	N_ACCTACCAGCTGACTT	N_ACCTGTCCAAAGAGTT	N_ACGGAAGAGCAAACAT	N_ACGTACACATCAGCAT	N_ACGTACATCGCAACAT	N_ACGTAGTAGGCCCAAA	N_AGAAATGAGGGCGAGA	N_AGAACAATCGCGCTGA	N_AGACAAAGTATTGCCA	N_AGCGTCGCAGTTGGTT	N_AGGAGGTGTTAGCTAC	N_AGGCATTAGTAAGCAT	N_AGGGTCCCACGGCGTT	N_AGTCAACTCCTCTGCA	N_ATACCTTTCCGGGACT	N_ATAGAGATCAGTCAGT	N_ATCTTCAGTTCCCACT	N_ATGCCTCGTGTGTCGC	N_ATGCCTCTCATGCCAA	N_ATTCAGGTCGCTGTTC	N_CAACAGTCACCCTAAA	N_CAACAGTCACCTCGTT	N_CAACAGTTCGATGCTA	N_CAACGATTCCGGACGT	N_CAAGAGGCAATAGTCC	N_CAATTTCGTGGACTGA	N_CAATTTCTCATCCCGT	N_CACGAATTCATCGCTC	N_CACTGTCCAGTCTTCC	N_CAGATACCAAGTAGTA	N_CAGATACGTTAGCTAC	N_CAGATACTCGGCTGAC	N_CAGATTGGTGAAGCGT	N_CAGGTATAGAGAGCAA	N_CATAAGCCACTTACAG	N_CATCCACAGATCACCT	N_CATGAGTCATTGGATC	N_CATTCATAGAACTCCT	N_CATTCATTCCGATGCG	N_CATTCCGTCGAACACT
Group	Normal	Normal	Normal	Normal	Normal	Normal	Normal	Normal	Normal	Normal	Normal	Normal	Normal	Normal	Normal	Normal	Normal	Normal	Normal	Normal	Normal	Normal	Normal	Normal	Normal	Normal	Normal	Normal	Normal	Normal	Normal	Normal	Normal	Normal	Normal	Normal	Normal	Normal	Normal	Normal	Normal	Normal	Normal	Normal	Normal	Normal	Normal	Normal	Normal
Cluster	A	A	A	A	A	A	A	A	A	A	A	A	A	A	A	A	A	A	A	A	A	A	A	A	A	A	A	A	A	A	A	A	A	A	A	A	A	A	A	A	A	A	A	A	A	A	A	A	A
A1BG--chr19---	0.726648	1.41365	1.94891	1.03734	0.463482	1.53079	0.422009	1.664	1.21909	1.93603	0.985315	-0.835561	0.621075	-0.835561	-0.835561	1.67716	-0.835561	2	1.392	2	0.521431	0.127958	0.848346	1.17456	-0.835561	1.89217	1.02242	0.870471	0.982043	1.40619	0.168566	1.70961	-0.835561	-0.835561	0.833544	1.24969	-0.835561	-0.135531	1.54816	1.20079	1.69863	-0.835561	0.683986	-0.835561	1.25223	-0.835561	-0.835561	1.51829	0.805756
A2M--chr12---	1.37281	0.447469	2	0.346323	0.804336	1.7362	0.710661	0.424694	-0.917056	0.666442	1.91616	1.6972	0.820116	0.046059	-1.71249	-0.352233	-1.71249	0.31862	0.824025	0.596057	1.35557	1.13317	1.07924	1.04831	0.881925	1.11953	0.721219	-0.338866	-0.249033	1.66543	0.249191	1.83108	0.036754	1.24497	0.454048	0.853396	-0.0564016	0.497082	0.0724124	0.897971	0.205791	0.554654	1.10611	0.710619	1.34697	0.412668	-0.245738	0.0289635	0.263125
ACAA1--chr3---	1.85969	0.587809	2	0.500339	-0.59154	1.873	-0.59154	1.5899	0.958589	2	-0.59154	-0.59154	-0.59154	-0.59154	-0.59154	-0.59154	-0.59154	-0.59154	1.98839	0.392817	0.323022	0.506179	-0.59154	1.79228	0.529747	1.6721	0.48854	-0.59154	-0.59154	-0.59154	1.96177	0.825392	-0.59154	0.840965	2	1.41003	-0.59154	1.27892	0.281598	1.46481	0.934572	-0.59154	0.0890908	-0.59154	0.317537	-0.59154	-0.59154	0.366545	2
ACAA2--chr18---	1.57091	0.408491	2	0.328549	1.19352	0.333602	1.13404	0.824312	1.63213	-0.669359	0.975201	-0.669359	1.41951	-0.669359	-0.669359	-0.669359	-0.669359	2	-0.669359	0.578807	-0.669359	-0.669359	1.74542	2	-0.669359	1.02515	1.01512	-0.669359	1.93715	-0.669359	1.25876	0.625626	-0.669359	-0.669359	0.413807	-0.250825	-0.669359	1.58469	0.72643	1.21001	0.72541	-0.669359	1.20478	-0.669359	0.777441	-0.669359	-0.669359	-0.669359	-0.669359
ACAT1--chr11--+	0.986206	-0.577647	-0.577647	1.97833	1.00234	-0.577647	-0.577647	0.403579	2	0.717157	1.29604	-0.577647	2	-0.577647	-0.577647	2	-0.577647	-0.577647	-0.577647	-0.577647	1.07956	0.996578	-0.577647	1.90455	-0.577647	2	0.547005	-0.577647	-0.577647	-0.577647	1.6191	2	-0.577647	-0.577647	-0.577647	0.971284	-0.577647	1.99044	1.01261	1.01763	-0.577647	1.44443	1.15949	-0.577647	2	-0.577647	-0.577647	0.419975	-0.577647
ACTA2--chr10---	-0.41967	-0.41967	-0.41967	-0.41967	-0.41967	-0.41967	-0.41967	-0.41967	-0.41967	-0.41967	-0.41967	-0.41967	-0.41967	-0.41967	-0.41967	-0.41967	-0.41967	-0.41967	-0.41967	-0.41967	-0.41967	-0.41967	-0.41967	-0.41967	-0.41967	-0.41967	-0.41967	-0.41967	-0.41967	-0.41967	-0.41967	-0.41967	-0.41967	-0.41967	-0.41967	-0.0475085	-0.41967	-0.41967	-0.41967	-0.41967	-0.41967	1.15849	-0.41967	-0.41967	-0.41967	-0.41967	-0.41967	-0.41967	-0.41967
ACTB--chr7---	-0.571768	-1.4619	-1.4619	-0.641639	-1.4619	-0.978131	0.242537	0.149019	-0.77856	-0.543273	-0.202417	-1.4619	-1.4619	-1.4619	-1.4619	0.276126	-1.4619	-1.4619	-0.324596	-0.582879	-0.52328	-0.499079	0.271452	-0.514156	-1.4619	-0.307882	-0.64941	-0.559195	-1.4619	-1.4619	-0.767353	-0.135262	-1.4619	-0.830412	-0.307395	-0.480978	0.580003	-0.637352	-0.788656	-0.0533785	-0.558622	-0.605841	-0.72647	-1.4619	-1.06115	-0.221171	-1.4619	-0.730795	-0.760295
ACTG1--chr17---	-0.330075	-1.40635	-1.40635	0.160028	-0.944326	-0.821417	-0.0265429	-0.535233	-1.40635	-1.40635	0.116516	-1.40635	-1.40635	-0.213997	0.702131	-1.40635	-1.40635	-1.40635	-0.358532	-0.201991	-0.918876	-0.600522	0.00196377	0.182891	-0.808689	-0.199801	-1.40635	-0.314872	-1.40635	-1.40635	-0.566561	0.197715	-1.40635	-0.642806	-0.340992	-0.339489	-1.40635	-1.40635	-0.940956	-0.589747	-0.314179	0.21716	-0.517128	-1.40635	-0.0399049	0.0938401	-1.40635	0.015156	-1.40635
ADGRE5--chr19--+	-0.344197	-0.344197	-0.344197	-0.344197	-0.344197	-0.344197	-0.344197	-0.344197	-0.344197	-0.344197	-0.344197	-0.344197	-0.344197	-0.344197	-0.344197	-0.344197	-0.344197	-0.344197	-0.344197	-0.344197	-0.344197	-0.344197	-0.344197	0.187831	-0.344197	-0.344197	-0.344197	-0.344197	-0.344197	-0.344197	-0.344197	-0.344197	-0.344197	-0.344197	-0.344197	-0.344197	-0.344197	-0.344197	-0.344197	-0.344197	-0.344197	-0.344197	-0.344197	-0.344197	-0.344197	-0.344197	-0.344197	-0.344197	-0.344197
ADH1A--chr4---	1.60869	-0.561815	2	0.611865	-0.561815	-0.561815	1.55924	1.19495	1.10445	-0.561815	-0.561815	-0.561815	1.89499	0.889209	-0.561815	-0.561815	-0.561815	2	2	0.0165403	1.72692	1.44768	-0.561815	2	0.643476	0.268544	-0.561815	0.748153	2	2	-0.561815	2	1.23146	-0.561815	-0.561815	1.58971	2	-0.561815	1.07983	0.380062	0.375966	1.52561	0.169807	-0.561815	-0.561815	-0.561815	-0.561815	-0.561815	-0.561815
ADH1B--chr4---	1.03405	0.307257	1.88669	1.41086	-0.71329	0.236349	-0.71329	2	-0.71329	0.362759	0.843837	-0.71329	-0.71329	-0.71329	-0.71329	1.58061	-0.71329	-0.71329	0.292918	1.45063	1.12923	1.41987	-0.71329	1.14714	1.87983	0.89113	1.3926	0.341282	-0.71329	-0.71329	1.11232	1.89091	-0.71329	1.32381	1.01632	0.807226	-0.71329	1.42092	0.0422772	1.44417	0.607327	2	0.342985	-0.71329	1.12025	-0.71329	1.7602	2	1.51528
ADH1C--chr4---	-0.616927	-0.616927	2	2	0.278472	1.31368	0.589376	-0.616927	-0.616927	0.667566	-0.616927	-0.616927	-0.616927	-0.616927	-0.616927	-0.616927	-0.616927	-0.616927	2	0.793812	-0.616927	1.63922	2	2	1.35037	0.796795	1.28695	-0.616927	2	-0.616927	-0.616927	0.846729	-0.616927	0.862816	0.60732	0.609307	-0.616927	1.93071	0.285003	0.965644	1.4997	-0.616927	0.643962	-0.616927	2	-0.616927	-0.616927	1.09625	1.02712
ADH4--chr4---	0.290773	-0.608339	2	1.96725	0.301175	-0.608339	2	0.380418	2	1.57818	-0.608339	2	-0.608339	0.80805	-0.608339	2	-0.608339	-0.608339	2	-0.608339	-0.608339	1.35319	-0.608339	1.37805	-0.608339	1.33707	-0.608339	-0.608339	-0.608339	-0.608339	-0.608339	2	-0.608339	-0.608339	0.635207	1.23533	-0.608339	0.544168	0.99412	2	0.307058	1.42926	1.14213	-0.608339	1.05268	-0.608339	-0.608339	0.39694	-0.608339
ADH5--chr4---	-0.592326	-0.592326	-0.592326	1.94542	-0.592326	0.542218	0.614987	0.381901	-0.592326	-0.592326	-0.592326	2	-0.592326	-0.592326	-0.592326	-0.592326	-0.592326	-0.592326	-0.592326	-0.0360724	0.353185	0.033995	2	1.07058	-0.592326	-0.592326	-0.592326	-0.592326	-0.592326	2	-0.592326	1.81872	-0.592326	-0.592326	1.47406	1.22425	-0.592326	1.34143	0.310359	1.53361	-0.592326	1.41533	0.111337	2	0.347514	-0.592326	2	-0.592326	-0.592326
ADI1--chr2---	0.801471	-0.660379	-0.660379	-0.660379	-0.660379	-0.660379	1.26026	-0.660379	-0.660379	-0.660379	2	-0.660379	-0.660379	-0.660379	2	-0.660379	-0.660379	-0.660379	1.25307	0.66893	-0.660379	0.811167	-0.660379	1.1823	1.19336	0.0915213	-0.660379	-0.660379	-0.660379	2	0.873185	1.6096	-0.660379	-0.660379	-0.660379	0.787523	-0.660379	1.16023	-0.660379	0.192502	-0.660379	-0.660379	-0.660379	-0.660379	0.224472	-0.660379	-0.660379	0.272173	-0.660379
ADIRF--chr10--+	-0.360331	-0.360331	1.98418	-0.360331	-0.360331	-0.360331	-0.360331	-0.360331	-0.360331	0.609985	-0.360331	-0.360331	-0.360331	-0.360331	-0.360331	1.70817	-0.360331	-0.360331	-0.360331	-0.360331	0.353319	-0.360331	-0.360331	-0.360331	-0.360331	-0.360331	-0.360331	-0.360331	-0.360331	-0.360331	0.345262	-0.360331	-0.360331	0.757479	-0.360331	-0.360331	-0.360331	-0.360331	0.320994	-0.360331	-0.360331	-0.360331	0.94147	-0.360331	0.349038	-0.360331	-0.360331	-0.360331	-0.360331
AGT--chr1---	1.06113	0.459764	0.678567	0.642171	0.590603	-0.375957	1.33057	0.687022	-0.982751	0.520939	1.01275	2	0.28102	0.620136	-0.982751	0.482992	1.79928	1.20587	0.718772	0.634645	0.651981	-0.146806	1.19141	1.82478	1.09938	2	0.629228	0.149521	-0.982751	1.76463	1.49797	0.30676	-0.0602948	2	0.742557	1.86223	0.801764	-0.375409	1.33769	1.55757	0.597888	-0.982751	1.01491	2	0.645004	-0.982751	-0.982751	0.491884	-0.102721
AGXT--chr2--+	1.44948	1.47984	2	1.76706	0.648932	0.925052	0.883794	0.506625	0.564762	0.679333	0.136514	0.466246	1.10142	0.605142	-1.1899	1.78357	-1.1899	2	1.73601	1.04006	0.906379	0.369816	2	1.57498	1.68645	0.797109	1.01194	0.485536	0.753711	1.11685	1.4042	2	-0.415388	0.855156	1.12943	0.904095	1.69619	0.67972	1.01991	1.58147	1.35898	1.27749	1.21871	1.42736	0.702515	-1.1899	0.137112	1.0505	1.41867
AHNAK--chr11---	-0.586721	-0.586721	-0.586721	-0.586721	-0.586721	-0.586721	-0.586721	0.241626	-0.586721	0.506346	1.92476	-0.586721	-0.586721	-0.586721	-0.586721	-0.586721	-0.586721	-0.586721	0.435401	0.278562	-0.586721	-0.0541848	-0.586721	-0.586721	-0.586721	-0.586721	-0.586721	0.484529	-0.586721	-0.586721	0.208134	-0.586721	-0.586721	-0.586721	-0.586721	-0.184171	-0.586721	-0.586721	-0.586721	-0.586721	0.180167	-0.586721	0.0115761	-0.586721	0.804826	-0.586721	-0.586721	-0.586721	0.812317
AHSG--chr3--+	1.7128	1.44883	1.19304	1.62269	0.917433	0.862146	1.18715	0.676411	0.389241	0.266645	1.67252	1.71161	0.74589	0.364659	0.757851	0.979401	-1.64347	1.7261	1.33694	1.48703	0.500215	0.678218	1.32746	1.76236	0.577228	1.50719	0.532229	0.924282	1.60347	0.947047	1.30745	1.82917	-0.466224	1.71586	1.26075	1.24507	0.790762	-0.167208	1.33454	0.9785	1.5233	0.510733	0.997606	1.8763	0.817195	0.560878	1.46328	0.761072	0.422826
AIF1--chr6--+	-0.346944	-0.346944	-0.346944	-0.346944	-0.346944	-0.346944	-0.346944	-0.346944	-0.346944	-0.346944	0.94128	-0.346944	-0.346944	-0.346944	-0.346944	-0.346944	-0.346944	-0.346944	-0.346944	-0.346944	-0.346944	-0.346944	-0.346944	0.315658	-0.346944	-0.346944	-0.346944	-0.346944	-0.346944	-0.346944	-0.346944	-0.346944	-0.346944	0.678598	0.501526	-0.0190965	-0.346944	-0.346944	-0.346944	-0.346944	-0.346944	-0.346944	-0.346944	-0.346944	-0.346944	-0.346944	-0.346944	-0.346944	-0.346944
AIG1--chr6--+	2	-0.573025	2	2	-0.573025	0.62156	0.69818	-0.573025	-0.573025	0.780576	1.38574	-0.573025	-0.573025	0.896404	-0.573025	-0.573025	-0.573025	-0.573025	-0.573025	0.498498	-0.573025	0.621899	-0.573025	0.434474	1.50012	0.267866	2	-0.573025	-0.573025	-0.573025	0.411284	2	1.243	0.98633	1.60272	0.349795	2	1.46306	-0.573025	0.380799	-0.573025	1.54088	0.167876	-0.573025	0.416552	-0.573025	-0.573025	0.469899	-0.573025
AKAP12--chr6--+	-0.29964	-0.29964	-0.29964	-0.29964	-0.29964	-0.29964	-0.29964	-0.29964	-0.29964	-0.29964	-0.29964	-0.29964	-0.29964	-0.29964	-0.29964	-0.29964	-0.29964	-0.29964	-0.29964	-0.29964	-0.29964	-0.29964	-0.29964	-0.29964	-0.29964	-0.29964	-0.29964	-0.29964	-0.29964	-0.29964	-0.29964	-0.29964	-0.29964	-0.29964	-0.29964	-0.29964	-0.29964	-0.29964	-0.29964	-0.29964	-0.29964	-0.29964	-0.29964	-0.29964	-0.29964	-0.29964	-0.29964	-0.29964	-0.29964
AKAP13--chr15--+	-0.512566	-0.512566	-0.512566	-0.512566	-0.512566	-0.512566	-0.512566	0.344625	-0.512566	-0.512566	-0.512566	-0.512566	-0.512566	-0.512566	-0.512566	-0.512566	-0.512566	-0.512566	-0.512566	-0.512566	-0.512566	0.0385142	-0.512566	-0.512566	-0.512566	-0.512566	-0.512566	-0.512566	-0.512566	-0.512566	-0.512566	0.776336	-0.512566	-0.512566	-0.512566	-0.512566	-0.512566	1.18888	-0.512566	-0.512566	-0.512566	-0.512566	-0.512566	-0.512566	-0.512566	-0.512566	-0.512566	-0.512566	-0.512566
AKAP9--chr7--+	-0.596839	-0.596839	-0.596839	1.26213	-0.596839	-0.596839	-0.596839	-0.596839	-0.596839	-0.596839	-0.596839	-0.596839	-0.596839	-0.596839	-0.596839	-0.596839	-0.596839	-0.596839	-0.596839	-0.059301	-0.596839	0.499844	-0.596839	-0.596839	0.523389	0.174918	-0.596839	0.620679	-0.596839	-0.596839	0.306544	-0.596839	1.06988	-0.596839	0.587207	-0.139325	-0.596839	-0.596839	-0.596839	-0.596839	0.274759	-0.596839	0.0831487	-0.596839	-0.596839	-0.596839	-0.596839	0.360341	-0.596839
AKR1A1--chr1--+	1.54286	-0.59038	-0.59038	0.563148	0.325376	1.38412	-0.59038	-0.59038	1.04727	-0.59038	-0.59038	2	-0.59038	0.83573	-0.59038	-0.59038	-0.59038	-0.59038	0.638051	-0.0219548	0.37582	0.0496457	-0.59038	0.771557	1.42164	0.225722	1.35679	-0.59038	-0.59038	-0.59038	0.364912	-0.59038	-0.59038	-0.59038	1.52122	0.981152	-0.59038	-0.59038	-0.59038	-0.59038	0.3313	-0.59038	0.12868	-0.59038	0.370024	-0.59038	2	0.421799	1.09105
AKR1C1--chr10--+	0.709256	1.67861	2	0.350229	0.722821	-0.605913	1.12201	-0.605913	0.751512	-0.605913	-0.605913	-0.605913	-0.605913	0.576169	-0.605913	-0.605913	-0.605913	2	-0.605913	0.256074	1.25862	-0.605913	-0.605913	-0.165139	1.06182	2	0.339896	0.461257	-0.605913	-0.605913	-0.605913	2	-0.605913	0.64851	0.431919	0.932768	2	-0.605913	-0.605913	-0.605913	0.730481	-0.605913	1.48197	-0.605913	1.97197	-0.605913	-0.605913	-0.605913	-0.605913
AKR1C4--chr10--+	0.774252	1.22949	-0.625839	0.392042	2	-0.625839	0.462813	1.82962	2	0.533377	-0.625839	-0.625839	2	-0.625839	2	-0.625839	-0.625839	-0.625839	1.20678	2	0.226742	1.11691	-0.625839	1.13899	0.419457	0.094295	1.09236	0.510239	-0.625839	2	0.217117	2	-0.625839	1.5687	-0.625839	1.44854	2	0.398121	-0.625839	1.29115	-0.625839	1.18449	0.512074	-0.625839	2	-0.625839	-0.625839	0.267315	-0.625839
AKR7A3--chr1---	0.33773	-0.551417	2	1.99563	-0.551417	0.587286	0.660321	0.426381	-0.551417	-0.551417	-0.551417	2	2	0.849272	-0.551417	-0.551417	-0.551417	-0.551417	1.4884	0.469981	-0.551417	1.38837	-0.551417	0.408951	2	1.37243	1.97373	0.713109	-0.551417	-0.551417	-0.551417	1.86846	-0.551417	0.934992	-0.551417	-0.0762381	2	1.38942	1.03328	-0.551417	2	-0.551417	-0.551417	-0.551417	-0.551417	-0.551417	-0.551417	-0.551417	-0.551417
ALB--chr4--+	1.33555	1.31933	1.59004	1.04388	1.26814	1.32775	1.10412	1.41494	0.291897	0.854966	0.489545	1.34844	0.635935	0.40093	-0.478784	-0.111785	-0.205162	1.57056	1.17019	1.17416	1.30919	2	1.71048	1.88296	1.36969	1.59775	0.902552	0.567455	1.37095	1.56714	1.38042	1.94311	-0.406971	0.693427	1.18575	1.9303	1.2352	0.275473	1.47895	1.10225	1.60547	0.51844	1.66926	1.59656	1.59692	-1.26354	1.48096	0.930982	0.0830514
ALDH1A1--chr9---	0.0215007	0.297347	-0.711558	0.222518	-0.711558	-0.711558	0.287462	0.0945894	-0.711558	0.352216	-0.711558	-0.711558	1.2437	0.443243	-0.711558	-0.711558	-0.711558	-0.711558	0.283172	0.741569	-0.711558	0.58178	2	0.0802195	0.247676	-0.0507148	0.212424	0.330984	-0.711558	-0.711558	1.09323	-0.711558	0.715628	0.513915	-0.711558	1.00074	-0.711558	0.888572	0.594949	0.0380372	-0.711558	-0.711558	0.332668	-0.711558	0.066135	-0.711558	-0.711558	0.10806	-0.711558
ALDH2--chr12--+	1.26455	-0.763005	-0.763005	-0.763005	1.28238	0.144727	0.202948	1.0414	-0.763005	1.48644	1.60027	-0.763005	-0.763005	0.353573	-0.763005	1.42967	-0.763005	-0.763005	0.1988	0.366651	0.998205	0.144984	1.4225	1.01532	-0.763005	0.770613	1.24995	0.930815	1.59602	2	-0.763005	2	-0.763005	2	0.890279	1.40605	-0.763005	-0.763005	1.60294	0.504246	0.499334	-0.763005	1.45402	-0.763005	1.67203	-0.763005	1.60133	0.0294842	1.36722
ALDOA--chr16--+	-0.0103979	-0.672588	-0.672588	-0.672588	-0.672588	-0.672588	-0.672588	-0.672588	-0.672588	-0.672588	0.717957	-0.672588	1.09364	0.370572	-0.672588	-0.672588	-0.672588	-0.672588	-0.672588	-0.2568	0.0341605	-0.204427	-0.672588	-0.283615	-0.672588	-0.0756318	-0.672588	-0.672588	-0.672588	-0.672588	-0.672588	0.422377	0.616623	-0.672588	-0.672588	-0.672588	-0.672588	-0.672588	0.507612	-0.672588	-0.672588	-0.672588	0.616623	-0.672588	-0.672588	-0.672588	-0.672588	-0.672588	-0.672588
ALDOB--chr9---	1.14787	0.886589	1.589	1.77956	1.407	1.00108	1.92236	1.47455	0.331946	1.47019	2	-1.42125	0.0219774	0.470168	0.215247	1.38223	-1.42125	-1.42125	1.23957	0.565874	1.67191	1.74124	0.82946	1.50072	1.62025	1.24126	1.24894	0.925753	0.674993	0.634305	1.21033	1.92348	-0.0109989	2	1.09348	1.45653	1.85128	0.464382	1.53462	1.38785	1.34983	0.607753	1.87652	-0.0541921	0.841861	-0.256879	1.16847	1.05856	1.09772
ALKBH7--chr19--+	0.422503	0.77253	2	0.677578	0.433264	0.68358	2	-0.507692	-0.507692	0.842154	2	-0.507692	-0.507692	-0.507692	-0.507692	2	-0.507692	-0.507692	1.62629	2	1.21996	2	2	0.891722	0.709502	0.330867	2	-0.507692	-0.507692	2	1.78244	1.03043	-0.507692	-0.507692	1.66201	-0.507692	-0.507692	-0.507692	1.71811	-0.507692	1.14895	-0.507692	2	-0.507692	0.47914	-0.507692	2	1.29265	-0.507692
AMBP--chr9---	1.41583	1.03313	1.76088	0.519474	1.3676	0.569568	0.654371	1.09656	0.584984	0.82449	0.669784	2	0.804233	0.671373	-0.132182	1.80793	0.402918	1.95898	1.43235	1.41975	0.717789	0.611718	2	1.06093	1.31296	0.716014	0.778844	0.112496	1.52518	2	0.946873	1.88611	-0.120584	0.756656	0.0755006	1.2705	1.43436	0.435871	0.948344	0.500982	1.39253	0.629201	0.671998	1.88403	0.679346	-0.0381568	1.20001	0.430619	0.687307
ANAPC11--chr17--+	-0.614342	-0.614342	-0.614342	1.84858	-0.614342	-0.614342	1.36551	0.331162	-0.614342	-0.614342	2	-0.614342	-0.614342	0.740086	-0.614342	-0.614342	-0.614342	-0.614342	0.552343	-0.0744882	-0.614342	0.902571	2	0.314308	0.510712	0.758847	0.469366	-0.614342	-0.614342	-0.614342	0.292933	-0.614342	-0.614342	0.822975	-0.614342	0.236256	2	0.487748	0.261729	0.264834	0.916896	1.33412	0.068575	2	0.297788	-0.614342	-0.614342	1.60392	-0.614342
ANAPC16--chr10--+	-0.590719	-0.590719	2	1.79676	0.252367	0.476648	0.545107	0.325823	-0.590719	-0.590719	-0.590719	-0.590719	-0.590719	-0.590719	-0.590719	-0.590719	-0.590719	-0.590719	-0.590719	0.366691	0.298807	0.87973	-0.590719	-0.590719	-0.590719	0.16062	-0.590719	0.594589	2	-0.590719	0.288765	0.787424	-0.590719	0.802571	1.35331	-0.145309	-0.590719	-0.590719	-0.590719	-0.590719	-0.590719	2	0.596503	-0.590719	-0.590719	-0.590719	-0.590719	1.02236	-0.590719
ANG--chr14--+	1.71657	-0.95441	2	1.32462	0.557021	0.612367	0.0937107	0.44468	1.50383	0.490098	-0.95441	-0.95441	1.66719	0.233825	1.14679	1.13982	-0.95441	2	1.26194	2	1.09059	0.830128	2	0.531317	1.3613	1.65017	0.594126	0.133298	1.26936	2	1.32079	2	-0.0682594	-0.193504	0.107268	1.44142	2	0.355622	1.74281	1.16329	1.15771	0.663493	1.15891	0.800841	0.942217	-0.95441	1.27346	0.848235	-0.109016
ANGPTL3--chr1--+	0.00692419	-0.704546	-0.704546	0.840385	1.34856	-0.704546	1.85848	1.48239	2	1.55339	2	-0.704546	-0.704546	-0.704546	-0.704546	-0.704546	-0.704546	-0.704546	0.927657	0.705786	1.43368	1.55289	-0.704546	1.453	1.37693	0.431771	0.825749	1.51803	-0.704546	-0.704546	1.41542	2	0.680609	1.81524	-0.704546	2	1.97507	0.207436	1.67033	0.0229738	0.562558	0.907811	1.27508	2	2	-0.704546	-0.704546	0.0909343	1.43372
ANKRD12--chr18--+	0.202843	-0.573858	-0.573858	1.11272	-0.573858	-0.573858	1.21468	-0.573858	-0.573858	-0.573858	-0.573858	-0.573858	-0.573858	-0.573858	-0.573858	-0.573858	-0.573858	-0.573858	0.480092	-0.573858	0.255107	-0.573858	-0.573858	-0.573858	0.442483	-0.573858	-0.573858	-0.573858	-0.573858	-0.573858	-0.573858	-0.573858	0.938294	-0.573858	0.500383	-0.158773	-0.573858	-0.573858	-0.573858	-0.573858	-0.573858	1.18633	0.938294	-0.573858	0.861021	-0.573858	-0.573858	-0.573858	-0.573858
ANXA1--chr9--+	-0.608337	-0.608337	-0.608337	-0.608337	-0.608337	-0.608337	-0.608337	-0.608337	-0.608337	-0.608337	-0.608337	-0.608337	-0.608337	-0.608337	-0.608337	-0.608337	-0.608337	-0.608337	-0.608337	-0.608337	-0.608337	-0.608337	-0.608337	-0.608337	-0.608337	-0.608337	-0.608337	-0.608337	1.40827	-0.608337	-0.608337	-0.608337	-0.608337	-0.608337	-0.608337	-0.608337	-0.608337	-0.608337	-0.608337	-0.608337	-0.608337	-0.608337	-0.608337	-0.608337	-0.608337	-0.608337	-0.608337	-0.608337	-0.608337
ANXA2--chr15---	-0.609626	-0.609626	1.91145	-0.609626	-0.609626	-0.609626	-0.609626	-0.609626	-0.609626	-0.609626	-0.609626	-0.609626	-0.609626	-0.609626	-0.609626	-0.609626	-0.609626	-0.609626	-0.609626	-0.609626	-0.609626	-0.101291	-0.609626	-0.187274	-0.609626	0.0385561	-0.609626	0.412941	-0.609626	-0.609626	-0.609626	-0.609626	-0.609626	-0.609626	-0.609626	-0.609626	-0.609626	-0.609626	0.671849	-0.609626	0.12241	1.94616	-0.609626	-0.609626	-0.609626	-0.609626	-0.609626	-0.609626	-0.609626
ANXA4--chr2--+	0.313072	-0.722495	-0.722495	-0.722495	-0.124812	0.0341861	-0.722495	-0.722495	0.346345	-0.722495	-0.722495	-0.722495	-0.722495	0.208279	-0.722495	-0.722495	-0.722495	-0.722495	-0.722495	-0.722495	-0.722495	-0.304772	1.09933	-0.722495	-0.722495	-0.189853	-0.722495	0.117797	-0.722495	-0.722495	-0.722495	0.254503	-0.722495	-0.722495	-0.722495	-0.137957	1.50282	-0.722495	0.691307	-0.118318	-0.722495	-0.722495	-0.722495	-0.722495	0.369039	-0.722495	-0.722495	-0.722495	0.374915
ANXA5--chr4---	-0.630361	-0.630361	-0.630361	-0.630361	-0.630361	-0.630361	-0.630361	-0.630361	-0.630361	0.46001	-0.630361	-0.630361	-0.630361	-0.630361	-0.630361	-0.630361	-0.630361	-0.630361	0.38924	-0.630361	0.171587	0.33219	1.68647	-0.630361	0.352856	0.047005	0.316723	-0.630361	-0.630361	-0.630361	-0.630361	0.612097	-0.630361	-0.630361	-0.630361	-0.630361	-0.630361	-0.630361	-0.630361	-0.630361	-0.630361	-0.630361	-0.630361	-0.630361	0.166776	-0.630361	-0.630361	-0.630361	-0.630361
AP2S1--chr19---	0.15193	-0.614798	-0.614798	-0.614798	-0.614798	0.367127	1.15078	-0.614798	-0.614798	-0.614798	0.995268	-0.614798	-0.614798	-0.614798	-0.614798	1.75709	-0.614798	2	-0.614798	0.90507	-0.614798	0.367405	-0.614798	-0.164419	0.388493	0.0763974	1.56268	-0.614798	1.93704	2	-0.614798	2	-0.614798	-0.614798	-0.614798	0.44737	-0.614798	-0.614798	-0.614798	0.169226	-0.614798	-0.614798	-0.614798	-0.614798	-0.614798	-0.614798	-0.614798	0.242465	-0.614798
APCS--chr1--+	1.19053	0.830557	2	1.84973	0.174206	0.070424	0.13432	-0.0734007	0.900906	-1.07513	-1.07513	2	1.06315	0.296002	-1.07513	-1.07513	-1.07513	1.35097	1.0672	1.04293	0.229938	1.64223	1.33495	1.30218	0.461455	-0.236278	1.53754	-0.328171	0.672926	-1.07513	1.26804	2	-0.0525809	-0.197104	-0.348706	0.930336	2	0.436546	-0.139045	0.682495	0.447962	1.93103	-0.0525809	2	1.42334	-1.07513	-1.07513	0.559514	2
APLP2--chr11--+	0.0251742	0.296561	-0.696033	-0.696033	0.58105	-0.696033	0.286836	1.13997	-0.696033	-0.696033	-0.696033	-0.696033	-0.696033	-0.696033	2	-0.696033	-0.696033	-0.696033	0.282615	-0.243189	-0.696033	-0.186147	1.52774	0.388974	0.247693	-0.0458737	-0.696033	0.329654	-0.696033	-0.696033	0.630022	-0.696033	-0.696033	0.509628	0.301456	-0.310605	2	-0.696033	0.589351	-0.696033	0.0382365	-0.696033	-0.696033	-0.696033	1.46163	-0.696033	1.70971	0.110334	-0.696033
APOA1--chr11---	1.45889	0.930692	2	0.272677	0.552234	1.12423	0.74909	1.07883	1.18041	0.314308	1.30675	2	0.116449	0.548216	0.508085	2	0.360538	1.92885	1.34194	1.64944	1.28988	1.08033	2	1.55096	1.45859	1.1053	1.21603	0.111307	1.57081	2	0.407736	2	0.296885	0.533516	0.550584	2	1.98193	0.897029	0.897974	0.982181	0.97796	0.576571	0.548657	1.90921	1.28388	0.578488	1.35071	0.645709	0.970671
APOA1-AS--chr11--+	1.53013	1.32915	2	0.568905	0.821166	2	0.257026	1.36424	2	1.20518	0.676485	-0.807283	0.627012	0.112433	-0.807283	2	-0.807283	1.83349	1.66891	1.3813	0.965442	1.20486	1.82087	1.87391	1.18415	1.15011	0.558605	0.0346239	0.365263	2	0.764448	2	1.6649	0.662513	1.2467	1.99291	2	1.47342	2	1.28426	1.87817	0.763548	0.503322	1.78907	1.04285	-0.807283	0.917133	0.587998	2
APOA2--chr1---	0.806151	0.0877229	2	2	0.54286	0.407827	1.37634	0.602188	0.365496	0.572041	2	1.37846	-0.127628	0.434452	-0.173567	1.85448	-2	1.94373	0.970404	1.15419	0.910722	1.07512	2	1.13117	0.96947	1.60845	0.872489	-0.215262	1.77657	2	0.898282	2	-1.5307	1.94141	0.792686	0.932201	2	-0.143246	0.743121	0.783587	0.327777	0.684057	0.818032	1.29572	0.609325	-0.253576	1.54366	0.554867	0.27652
APOB--chr2---	1.26205	0.437606	0.510645	1.24865	0.75556	1.3171	1.40038	1.05912	1.35333	1.65672	1.13386	-1.48683	0.483875	0.280895	0.321705	1.44139	-1.48683	0.322806	1.33234	1.11434	1.29692	1.6334	1.23771	1.57646	0.914457	1.91935	0.0320484	0.330249	-0.18295	-1.48683	1.65881	1.13305	0.546034	1.32792	0.985836	1.55664	0.63086	1.67967	1.74822	1.61758	0.900284	-0.0942764	0.782385	0.0239411	2	-1.48683	-0.180014	1.30639	1.39151
APOC1--chr19--+	0.794455	0.167817	2	1.97457	0.807338	0.59533	1.64909	0.855097	-0.0653664	0.419393	1.92271	1.13603	0.266525	0.584544	-0.919565	1.53521	-2	1.32547	0.802361	0.951829	0.968856	1.89726	1.76112	1.28752	1.21957	1.25756	0.856839	0.395756	1.39138	2	1.36606	2	-0.733817	1.68401	0.734031	1.01739	1.45841	-0.0943693	1.0326	0.920345	1.15744	0.646337	1.49088	0.828887	0.430417	0.0953775	1.04364	1.41452	0.338643
APOC1P1--chr19--+	1.09525	-0.258533	1.93747	1.78725	0.437123	1.55734	2	0.523816	0.841107	0.569804	2	1.81036	-0.892831	-0.892831	-0.892831	2	-0.892831	-0.892831	0.987028	0.876881	0.876251	2	-0.892831	1.12341	-0.892831	0.832963	0.675137	0.546903	-0.892831	1.77954	2	2	0.00443987	1.95812	-0.255405	1.75591	1.59843	0.11317	0.444491	-0.068837	0.976976	0.151616	2	0.884446	-0.0414117	-0.892831	0.644514	-0.00083672	-0.0368284
APOC2--chr19--+	0.812448	0.24426	2	1.84682	0.825465	0.595687	1.77687	0.301973	0.955116	0.10492	1.78126	1.82996	-0.0261037	0.568569	-1.76107	1.72832	0.264062	1.92227	1.40161	1.28322	0.332395	1.02591	1.85068	1.34827	1.09009	1.35758	0.740552	-0.161353	1.77825	2	0.487965	2	-1.08959	1.47203	0.79839	1.31303	1.28916	0.166065	0.593746	0.683893	0.832779	0.378113	1.11492	1.33039	0.805352	-0.0941354	1.62526	0.826156	0.922039
APOC3--chr11--+	1.05704	0.476934	2	1.99836	1.0571	0.824114	1.32046	1.09275	0.655351	1.07785	1.85001	1.44654	0.061623	0.394074	0.242829	2	-0.208718	1.83884	1.56801	1.17625	1.25294	1.02288	1.74384	1.31066	1.32435	1.49904	0.808253	0.443074	0.887779	2	1.33976	2	-0.0586999	1.75407	1.01137	1.59821	1.44099	0.269995	1.25342	1.11107	1.02922	0.273093	1.15415	1.67124	0.516445	-0.498054	1.5635	1.09718	0.64609
APOC4--chr19--+	1.98427	1.13647	1.88424	2	2	0.753888	1.12329	1.61892	0.211174	0.0291773	1.43311	2	-0.708851	0.618846	1.63896	1.63117	-0.708851	-0.708851	1.11755	0.906367	1.04586	0.904842	2	1.86804	1.06969	1.72333	2	0.0144468	-0.708851	2	1.03174	2	0.281306	0.141362	0.477435	1.0522	2	0.401292	0.766912	1.18754	1.18192	-0.708851	1.18313	2	0.54872	-0.708851	0.987641	0.60331	-0.708851
APOE--chr19--+	0.823446	1.26304	2	1.14918	0.837848	-0.0811287	-0.034099	0.643186	-0.814379	0.0164768	1.09463	2	1.51659	0.0875734	1.82874	1.81997	-0.814379	1.83035	0.499128	1.14008	0.608295	1.00228	2	1.05453	-0.0651735	2	0.417119	0.553859	-0.814379	2	-0.210199	2	0.976493	1.87343	-0.814379	1.71948	2	1.43137	1.3154	1.32053	0.554728	0.483157	1.15421	2	1.1526	1.06621	1.09549	0.293763	1.38343
APOH--chr17---	1.29788	0.784897	1.5329	0.853194	0.68913	1.01561	0.705371	1.13751	1.05465	0.201058	0.743468	1.40744	-0.588643	0.420019	0.36301	0.355906	1.4103	1.15841	0.886282	1.28807	1.05849	0.439746	2	1.11236	1.68415	1.15516	0.837865	0.173734	1.67035	2	0.593965	2	-0.977431	1.19551	0.854287	1.6123	2	0.550944	1.03162	0.921702	0.955168	0.744841	0.587149	1.97352	1.1587	-0.274629	1.56001	0.917753	1.23468
APOM--chr6--+	1.30083	0.541785	2	0.846559	-0.19537	-0.764159	1.98113	-0.764159	1.35132	0.051797	-0.764159	2	0.735597	0.703728	-0.764159	1.82295	2	-0.764159	0.928751	1.50337	0.280173	0.227882	2	0.646584	1.20218	-0.257267	-0.764159	-0.764159	2	1.54395	-0.764159	2	-0.764159	-0.764159	0.0135268	1.47474	2	-0.764159	0.237983	1.52357	-0.764159	0.510109	0.581426	1.40419	0.626198	-0.764159	2	-0.764159	1.39424
APRT--chr16---	-0.207916	0.0275193	-0.833584	-0.0363473	0.971921	-0.0323103	0.0190824	1.37136	-0.833584	0.0743501	-0.833584	1.77111	-0.833584	0.152042	-0.833584	-0.833584	-0.833584	-0.833584	1.05016	0.622357	1.04677	-0.0320831	1.09561	0.548688	-0.0148749	-0.833584	-0.0449629	-0.833584	-0.833584	-0.833584	1.76454	1.75652	-0.833584	0.885249	-0.833584	-0.833584	2	-0.833584	0.281524	0.667863	-0.833584	-0.833584	1.12343	-0.833584	-0.833584	-0.833584	1.25347	0.37736	-0.833584
AREG--chr4--+	-0.326149	-0.326149	-0.326149	-0.326149	-0.326149	-0.326149	-0.326149	-0.326149	-0.326149	-0.326149	-0.326149	-0.326149	-0.326149	-0.326149	-0.326149	-0.326149	-0.326149	-0.326149	-0.326149	-0.326149	-0.326149	-0.326149	-0.326149	-0.326149	-0.326149	-0.326149	-0.326149	-0.326149	-0.326149	-0.326149	-0.326149	-0.326149	-0.326149	-0.326149	-0.326149	-0.326149	-0.326149	-0.326149	-0.326149	-0.326149	-0.326149	-0.326149	-0.326149	-0.326149	-0.326149	-0.326149	-0.326149	-0.326149	-0.326149
ARF1--chr1--+	-0.500085	-0.500085	-0.500085	-0.500085	-0.500085	-0.500085	-0.500085	0.513811	-0.500085	-0.500085	-0.500085	-0.500085	-0.500085	-0.500085	-0.500085	-0.500085	-0.500085	-0.500085	-0.500085	-0.500085	-0.500085	-0.500085	-0.500085	-0.500085	-0.500085	0.331061	-0.500085	0.811126	-0.500085	-0.500085	1.19511	-0.500085	-0.500085	-0.500085	-0.500085	0.412041	-0.500085	-0.500085	-0.500085	-0.500085	-0.500085	-0.500085	-0.500085	-0.500085	1.77967	-0.500085	-0.500085	-0.500085	-0.500085
ARG1--chr6--+	0.627445	1.04314	1.90659	1.43851	1.08407	1.85987	1.02868	2	-0.651018	-0.651018	-0.651018	-0.651018	1.29457	-0.651018	-0.651018	-0.651018	-0.651018	-0.651018	0.338793	0.186911	0.127499	0.940335	-0.651018	1.17909	0.303473	2	1.42055	0.386368	1.7767	-0.651018	1.14484	2	-0.651018	1.35288	0.357849	0.359486	-0.651018	0.28399	0.0922365	1.09944	1.09323	1.00205	2	2	0.69654	-0.651018	1.78217	1.23094	-0.651018
ARGLU1--chr13---	-0.569067	-0.569067	-0.569067	-0.569067	-0.569067	-0.569067	-0.569067	0.0931765	-0.569067	-0.569067	-0.569067	-0.569067	-0.569067	-0.569067	-0.569067	-0.569067	-0.569067	-0.569067	-0.569067	-0.569067	-0.569067	-0.143317	-0.569067	-0.569067	-0.569067	-0.569067	-0.569067	-0.569067	-0.569067	-0.569067	-0.569067	-0.569067	-0.569067	-0.569067	-0.569067	-0.569067	-0.569067	-0.569067	0.0445447	-0.569067	-0.569067	-0.569067	-0.569067	-0.569067	-0.569067	-0.569067	-0.569067	-0.569067	-0.569067
ARHGDIB--chr12---	-0.535077	-0.535077	-0.535077	-0.535077	-0.535077	-0.535077	-0.535077	-0.535077	-0.535077	-0.535077	-0.535077	-0.535077	-0.535077	0.595618	-0.535077	-0.535077	-0.535077	-0.535077	-0.535077	-0.535077	-0.535077	-0.535077	-0.535077	-0.535077	-0.535077	-0.535077	-0.535077	-0.535077	-0.535077	-0.535077	-0.535077	-0.535077	-0.535077	-0.535077	-0.535077	-0.535077	2	-0.535077	-0.535077	-0.535077	-0.535077	-0.535077	-0.535077	-0.535077	-0.535077	-0.535077	-0.535077	-0.535077	-0.535077
ARID4B--chr1---	-0.445344	-0.445344	-0.445344	-0.445344	-0.445344	-0.445344	-0.445344	-0.445344	-0.445344	-0.445344	-0.445344	-0.445344	-0.445344	-0.445344	-0.445344	-0.445344	-0.445344	-0.445344	-0.445344	0.116354	-0.445344	-0.445344	-0.445344	-0.445344	0.725235	-0.445344	-0.445344	-0.445344	-0.445344	-0.445344	0.498643	-0.445344	-0.445344	-0.445344	-0.445344	-0.445344	-0.445344	0.701342	0.466176	-0.445344	-0.445344	-0.445344	-0.445344	-0.445344	-0.445344	-0.445344	-0.445344	-0.445344	-0.445344
ARL6IP1--chr16---	0.386346	-0.528788	-0.528788	0.637291	0.396932	2	-0.528788	0.477588	1.12668	-0.528788	-0.528788	-0.528788	-0.528788	-0.528788	-0.528788	-0.528788	-0.528788	-0.528788	0.71301	0.929724	-0.528788	-0.528788	2	0.00876548	-0.528788	-0.528788	1.43957	-0.528788	-0.528788	-0.528788	-0.528788	-0.528788	-0.528788	-0.528788	-0.528788	0.376572	-0.528788	0.644255	-0.528788	-0.528788	-0.528788	1.54512	-0.528788	-0.528788	0.442066	-0.528788	-0.528788	0.494404	1.17093
ARL6IP4--chr12--+	-0.735581	-0.735581	-0.735581	1.23819	-0.0385862	0.76724	0.851064	0.578561	-0.735581	-0.735581	2	2	-0.735581	-0.735581	-0.735581	-0.735581	-0.735581	-0.735581	1.33891	0.055928	-0.735581	1.02065	2	1.18122	0.166032	1.3694	0.132897	-0.735581	-0.735581	-0.735581	1.62256	1.13965	-0.735581	-0.735581	0.871587	0.218942	-0.735581	0.147629	-0.735581	0.496322	0.491547	0.825907	0.9133	-0.735581	-0.735581	-0.735581	-0.735581	0.0348026	-0.735581
ARPC1B--chr7--+	0.099459	-0.623121	-0.623121	-0.623121	-0.623121	-0.623121	1.0408	-0.623121	-0.623121	-0.623121	-0.623121	-0.623121	-0.623121	-0.623121	-0.623121	-0.623121	-0.623121	-0.623121	-0.623121	-0.169415	-0.623121	-0.623121	-0.623121	-0.198675	-0.623121	-0.623121	-0.623121	-0.623121	-0.623121	-0.623121	-0.623121	-0.623121	-0.623121	-0.623121	-0.623121	-0.623121	-0.623121	-0.623121	0.11315	-0.623121	-0.623121	-0.623121	-0.0491813	-0.623121	-0.623121	-0.623121	-0.623121	-0.623121	-0.623121
ARPC2--chr2--+	-0.778793	-0.778793	-0.778793	-0.778793	-0.778793	-0.778793	-0.778793	-0.778793	-0.778793	-0.778793	-0.778793	-0.778793	-0.778793	0.824645	-0.778793	-0.778793	-0.778793	-0.778793	0.0546623	-0.393133	-0.778793	-0.344554	1.11506	-0.778793	0.0249215	-0.778793	-0.778793	-0.778793	-0.778793	-0.778793	-0.778793	0.236833	-0.778793	0.247995	0.0707081	-0.450547	-0.778793	-0.778793	0.315891	-0.150729	-0.778793	-0.778793	-0.290932	-0.778793	-0.778793	-0.778793	-0.778793	-0.778793	-0.778793
ARPC3--chr12---	0.560297	-0.0016872	1.2196	-0.790818	-0.790818	-0.790818	-0.00941888	-0.790818	-0.790818	-0.790818	-0.790818	-0.790818	-0.790818	0.706016	-0.790818	-0.790818	-0.790818	-0.790818	-0.790818	-0.790818	-0.178862	-0.385449	-0.790818	-0.454016	-0.790818	-0.273929	-0.790818	-0.790818	-0.790818	-0.790818	-0.790818	1.22286	0.325477	0.167705	-0.790818	-0.790818	-0.790818	0.460748	-0.790818	-0.790818	-0.790818	0.508579	-0.790818	-0.790818	-0.790818	-0.790818	-0.790818	-0.790818	0.274135
ARPC5--chr1---	0.0620863	0.321443	-0.627151	-0.627151	-0.627151	-0.627151	-0.627151	-0.627151	-0.627151	-0.627151	0.820192	-0.627151	-0.627151	0.458618	-0.627151	-0.627151	-0.627151	-0.627151	-0.627151	0.471335	-0.627151	-0.627151	-0.627151	-0.22229	-0.627151	-0.0058122	-0.627151	-0.627151	-0.627151	-0.627151	0.10016	-0.627151	-0.627151	-0.627151	-0.627151	-0.627151	-0.627151	0.256332	-0.627151	-0.627151	-0.627151	-0.627151	-0.0796951	2	0.104053	-0.627151	-0.627151	-0.627151	-0.627151
ASGR1--chr17---	1.42938	0.620294	1.32977	1.56948	1.2185	1.29138	0.608413	-0.112635	2	0.0980026	-0.771749	1.72341	-0.771749	1.25586	-0.771749	1.08237	-0.771749	2	1.67296	1.75398	-0.132063	0.755926	2	1.43433	1.32423	1.47261	0.930402	0.080643	2	-0.771749	0.703862	1.70943	-0.771749	0.230209	-0.771749	1.0624	1.48561	-0.00347829	0.296463	0.972087	1.22771	0.58653	0.0820197	1.53956	0.710273	-0.771749	-0.771749	0.774607	0.341463
ASGR2--chr17---	0.314365	1.12696	1.41745	0.577793	1.75321	0.0174556	0.0691246	-0.0963778	-0.788127	-0.788127	2	2	1.77278	0.85401	-0.788127	-0.788127	-0.788127	2	0.654952	0.870545	1.10234	1.02144	2	0.96178	0.60992	1.36265	0.564853	1.17692	-0.788127	-0.788127	0.36845	1.8159	-0.788127	0.263442	0.0818763	1.26757	-0.788127	0.0181838	0.332977	-0.144905	1.95608	-0.788127	-0.288491	2	1.37289	1.27797	-0.788127	-0.0848188	-0.788127
ASL--chr7--+	1.41572	1.38682	-0.595145	0.492208	-0.595145	1.26608	-0.595145	0.343287	-0.595145	0.643188	-0.595145	-0.595145	-0.595145	-0.595145	-0.595145	2	-0.595145	-0.595145	-0.595145	0.385131	0.315626	-0.595145	2	1.54586	0.521494	-0.595145	0.480457	-0.595145	-0.595145	-0.595145	0.305344	1.72731	1.06623	-0.595145	2	1.39813	2	-0.595145	0.925752	1.45268	2	-0.595145	1.77926	-0.595145	-0.595145	-0.595145	-0.595145	2	-0.595145
ASS1--chr9--+	0.979168	0.954953	-0.705749	0.205353	0.0175519	1.75555	0.940778	1.49213	0.587733	1.03311	-0.705749	-0.705749	-0.705749	0.42065	-0.705749	-0.705749	-0.705749	-0.705749	0.264515	-0.256784	1.07095	1.35121	-0.705749	1.28339	2	1.73906	1.32491	-0.705749	2	-0.705749	1.05465	1.24026	1.53077	-0.705749	-0.705749	1.15102	-0.705749	0.210795	2	0.572648	0.567693	0.914672	-0.137807	2	0.615197	-0.705749	-0.705749	0.678148	2
ATF3--chr1--+	-0.394093	-0.394093	-0.394093	-0.394093	0.405858	-0.394093	-0.394093	-0.394093	-0.394093	-0.394093	-0.394093	-0.394093	-0.394093	-0.394093	-0.394093	-0.394093	-0.394093	-0.394093	-0.394093	-0.394093	-0.394093	-0.394093	-0.394093	-0.394093	-0.394093	0.318806	0.602672	0.730571	-0.394093	-0.394093	-0.394093	0.913541	-0.394093	-0.394093	-0.394093	0.388264	-0.394093	-0.394093	-0.394093	0.414549	-0.394093	1.39805	-0.394093	-0.394093	-0.394093	-0.394093	-0.394093	-0.394093	-0.394093
ATF4--chr22--+	-0.595317	-0.595317	-0.595317	1.81773	0.256797	0.483479	-0.595317	0.331039	-0.595317	-0.595317	-0.595317	2	-0.595317	0.731682	-0.595317	-0.595317	-0.595317	-0.595317	0.547742	-0.595317	-0.595317	0.000228246	-0.595317	0.314526	-0.595317	-0.595317	-0.595317	-0.595317	-0.595317	-0.595317	0.293584	-0.595317	2	0.812892	0.569748	0.238055	-0.595317	-0.595317	-0.595317	-0.595317	-0.595317	2	0.0737699	-0.595317	-0.595317	-0.595317	-0.595317	-0.595317	-0.595317
ATF5--chr19--+	2	1.99618	2	2	0.894031	1.73833	1.4852	1.18975	0.704546	2	0.900763	1.312	0.569847	0.0280779	1.53692	-0.753526	-0.753526	-0.753526	0.740284	1.42227	-0.223984	2	-0.753526	1.49222	0.349198	1.38349	0.313652	1.73351	-0.753526	-0.753526	2	2	-0.753526	2	2	0.65419	-0.753526	0.955496	1.2605	0.437124	1.411	0.370878	1.90156	-0.753526	0.163074	1.64443	-0.753526	0.526571	-0.753526
ATOX1--chr5---	-0.73097	-0.73097	1.67638	2	1.25031	-0.73097	2	1.95813	0.511048	0.265356	1.55823	-0.73097	1.10031	-0.73097	-0.73097	2	-0.73097	2	0.844131	1.07945	0.97504	1.01903	-0.73097	0.991623	0.167445	-0.73097	-0.73097	1.41385	-0.73097	-0.73097	1.31483	1.68029	-0.73097	0.416803	-0.73097	0.676894	1.8549	-0.73097	1.56082	0.496563	-0.0319548	1.70952	0.605726	2	-0.73097	-0.73097	1.55927	0.0366812	0.544247
ATP5A1--chr18---	0.296795	-0.588252	-0.588252	-0.588252	0.978951	-0.588252	-0.588252	0.385037	-0.588252	-0.588252	1.27027	-0.588252	-0.588252	-0.588252	-0.588252	-0.588252	-0.588252	-0.588252	0.612719	0.428436	1.05555	0.037466	-0.588252	1.36706	0.569864	0.825291	-0.588252	1.52676	-0.588252	2	1.03905	-0.588252	-0.588252	0.891303	-0.588252	0.287342	-0.588252	-0.588252	-0.588252	0.31676	0.312824	2	0.114734	-0.588252	-0.588252	-0.588252	-0.588252	-0.588252	-0.588252
ATP5B--chr12---	0.0548518	0.340478	-0.704198	0.262996	0.0636328	-0.704198	-0.704198	0.743501	-0.704198	0.397293	0.889746	-0.704198	-0.704198	1.86365	-0.704198	-0.704198	2	2	2	-0.227593	0.105928	0.26817	-0.704198	0.720598	0.289046	1.30095	0.252544	0.375308	-0.704198	-0.704198	0.691437	1.96158	-0.704198	0.564725	0.34563	0.0467453	-0.704198	-0.704198	-0.704198	0.652904	1.11087	1.9939	0.77359	-0.704198	0.101069	1.78895	1.82778	0.14448	-0.704198
ATP5C1--chr10--+	0.183075	1.27722	-0.644213	1.72563	-0.644213	-0.644213	-0.644213	0.265559	-0.644213	-0.644213	1.09302	-0.644213	-0.644213	-0.644213	-0.644213	-0.644213	-0.644213	-0.644213	-0.644213	-0.124761	0.238743	-0.0593293	1.90665	0.249342	0.438324	-0.644213	-0.644213	1.94017	-0.644213	-0.644213	-0.644213	0.723751	-0.644213	-0.644213	-0.644213	-0.202093	-0.644213	-0.644213	0.19875	0.201737	-0.644213	1.23061	-0.644213	2	0.884121	-0.644213	-0.644213	0.956955	0.892348
ATP5E--chr20---	0.591515	-0.422573	1.54649	1.65341	-0.615507	-0.473157	-0.429706	-0.141707	-1.15061	0.135805	-1.15061	-1.15061	-1.15061	-0.317293	-1.15061	1.28327	-1.15061	-1.15061	0.0629429	0.0803428	-0.168129	1.24105	-1.15061	0.796441	-0.458416	-0.00605121	-0.483854	-1.15061	-1.15061	1.0208	-0.17799	2	-1.15061	1.33267	-0.418983	-0.0659065	1.70881	0.371889	0.615122	-0.609693	0.383387	0.729692	0.321257	-1.15061	-1.15061	-1.15061	0.613926	-0.126795	-0.168105
ATP5G1--chr17--+	-0.711905	0.291501	2	1.37656	0.579088	-0.711905	0.28167	0.678601	-0.711905	1.06108	0.819068	2	-0.711905	-0.711905	2	-0.711905	-0.711905	2	-0.711905	1.41567	0.0662164	0.574383	2	0.384921	0.242101	0.452511	0.20704	0.324954	-0.711905	2	1.78327	2	-0.711905	1.29097	0.296449	0.553716	2	-0.711905	0.58748	0.0336046	0.586531	-0.711905	-0.132816	-0.711905	0.0615492	-0.711905	2	0.699154	0.642218
ATP5G2--chr12---	0.19208	-1.03476	-1.03476	0.750745	-0.508099	-0.367997	-0.325232	0.290637	-1.03476	0.231355	1.15795	1.13267	-1.03476	0.324396	-1.03476	-1.03476	-1.03476	1.37015	-0.328278	-0.204987	0.25891	0.101072	0.570568	-0.472419	0.488404	0.74538	-1.03476	-1.03476	1.50888	-1.03476	-0.485362	1.39164	-1.03476	-0.1644	-1.03476	-0.13096	-1.03476	-1.03476	-1.03476	-0.502378	-0.504693	0.145119	0.211154	-1.03476	-1.03476	-1.03476	-1.03476	-0.452646	-1.03476
ATP5G3--chr2---	0.243385	0.62054	0.873664	0.521926	-0.493779	0.528235	0.607655	1.0986	-0.0566841	-0.252833	-1.04825	1.23366	0.413757	0.806068	1.48214	2	2	-1.04825	0.60205	0.0382995	-0.0302048	0.147569	0.641866	0.326985	-0.331001	0.825912	-1.04825	-0.268709	1.62975	1.20177	0.585019	2	-1.04825	1.23853	-1.04825	0.375128	1.01619	-1.04825	-0.489735	-0.487755	0.262462	-1.04825	-0.612876	-1.04825	-0.0356307	-1.04825	0.780165	0.0126267	1.05582
ATP5H--chr17---	-0.653128	-0.653128	-0.653128	1.03733	0.725383	-0.653128	0.407802	-0.653128	-0.653128	-0.653128	-0.653128	-0.653128	1.42329	-0.653128	-0.653128	2	-0.653128	-0.653128	0.403246	0.89005	0.177743	0.344139	-0.653128	0.187716	0.36555	0.590224	-0.653128	0.454021	-0.653128	-0.653128	0.168363	2	-0.653128	-0.653128	0.423583	0.117045	-0.653128	-0.653128	0.734344	0.14292	0.139458	-0.653128	0.455809	-0.653128	0.172759	-0.653128	-0.653128	-0.653128	1.68655
ATP5I--chr4---	0.954379	0.629505	-0.558438	1.91412	0.314693	-0.558438	-0.558438	-0.558438	-0.558438	0.694111	1.2541	-0.558438	1.74379	-0.558438	-0.558438	-0.558438	-0.558438	-0.558438	-0.558438	-0.0164711	1.5863	0.0517966	-0.558438	-0.0514225	-0.558438	0.219677	-0.558438	-0.558438	-0.558438	-0.558438	1.56662	-0.558438	-0.558438	-0.558438	0.635363	0.29549	2	0.547966	-0.558438	-0.558438	-0.558438	-0.558438	1.12201	-0.558438	1.57585	-0.558438	2	0.406628	-0.558438
ATP5J--chr21---	0.968357	-0.292307	0.877108	1.86232	0.775181	0.531119	0.929888	0.886905	-1.04792	0.287224	1.63837	1.23769	0.416456	0.809402	-1.04792	0.650488	-1.04792	2	0.605054	0.695721	0.316282	0.978577	1.47136	0.972887	0.872029	1.16945	0.132963	-0.267115	-1.04792	2	0.303766	1.96833	-1.04792	1.77442	0.232685	0.234493	1.01986	-1.04792	0.265795	-1.04792	-0.0701346	0.196287	1.50119	1.06928	0.309638	-1.04792	1.63936	-0.434073	-0.0281991
ATP5J2--chr7---	0.968777	-0.733601	-0.733601	1.33589	1.66536	0.191605	0.92999	0.0608681	-0.733601	-0.733601	-0.733601	-0.733601	-0.733601	1.15238	-0.733601	-0.733601	-0.733601	-0.733601	0.923765	0.4178	0.0374508	0.541001	1.49397	0.0467063	0.211737	-0.082331	-0.733601	-0.733601	1.67084	2	1.04504	2	-0.733601	0.474119	-0.733601	-0.347514	1.98733	0.843348	0.995077	0.00513521	0.553038	-0.733601	0.295497	-0.733601	-0.733601	-0.733601	1.67625	-0.733601	-0.733601
ATP5L--chr11--+	0.0230563	-1.18157	0.610874	1.79122	0.0344314	-1.18157	0.660019	0.389794	-1.18157	-1.18157	-0.108075	-1.18157	-1.18157	-0.376254	-1.18157	0.399863	-1.18157	2	-0.487881	0.563485	-0.232102	-0.526695	2	0.368676	-0.512635	-0.0754705	-1.18157	-1.18157	0.519842	-1.18157	1.09907	0.613786	-0.186304	0.222818	-0.474526	-0.133314	0.743794	-1.18157	0.0416661	-0.267583	-0.661102	1.09777	0.240839	1.63553	0.34783	-1.18157	-1.18157	-0.609997	-0.232079
ATP5O--chr21---	0.88606	0.862362	-0.762888	-0.762888	-0.762888	0.13328	0.190759	-0.762888	-0.762888	0.252572	-0.762888	-0.762888	-0.762888	0.339465	-0.762888	-0.762888	-0.762888	-0.762888	0.186663	0.624241	-0.0160365	-0.762888	-0.762888	0.28986	-0.762888	-0.132059	-0.762888	-0.762888	1.56609	2	-0.0244681	-0.762888	-0.762888	-0.762888	-0.762888	0.206515	-0.762888	0.13409	-0.0498648	0.916373	-0.762888	0.822941	1.18417	1.93563	0.529859	-0.762888	-0.762888	0.0195047	-0.762888
ATP6V0B--chr1--+	-0.541048	-0.541048	-0.541048	-0.541048	-0.541048	-0.541048	-0.541048	-0.541048	-0.541048	-0.541048	1.25688	-0.541048	-0.541048	0.807725	-0.541048	-0.541048	-0.541048	2	0.620766	-0.00344855	-0.541048	0.0642691	2	-0.541048	-0.541048	-0.541048	-0.541048	-0.541048	-0.541048	2	1.03319	-0.541048	-0.541048	-0.541048	-0.541048	0.645055	2	0.55644	-0.541048	-0.541048	-0.541048	1.39928	-0.541048	2	1.57605	-0.541048	2	1.11606	-0.541048
ATP6V0E1--chr5--+	-0.651582	-0.651582	-0.651582	0.276207	-0.651582	-0.651582	1.54808	-0.651582	-0.651582	-0.651582	0.877421	-0.651582	-0.651582	-0.651582	-0.651582	-0.651582	-0.651582	-0.651582	-0.651582	0.184844	-0.651582	-0.136806	-0.651582	-0.223878	1.47861	-0.651582	0.266181	0.383943	-0.651582	-0.651582	0.116765	-0.651582	-0.651582	0.565643	-0.651582	0.0687668	-0.651582	-0.651582	0.0903388	-0.651582	-0.651582	0.998517	-0.0732378	-0.651582	-0.651582	-0.651582	-0.651582	0.16252	-0.651582
ATP6V1G1--chr9--+	1.54824	-0.703548	-0.703548	1.25508	-0.703548	0.172092	0.228255	-0.703548	-0.703548	0.288652	-0.703548	-0.703548	-0.703548	-0.703548	-0.703548	-0.703548	-0.703548	-0.703548	-0.703548	0.081887	-0.703548	-0.220154	-0.703548	-0.301918	0.191146	0.388475	-0.703548	-0.703548	-0.703548	-0.703548	0.0179582	2	0.627612	0.439472	0.242115	0.698485	-0.703548	-0.703548	-0.703548	-0.703548	-0.00742803	0.845957	0.270419	1.93316	0.559588	2	-0.703548	-0.703548	-0.703548
ATPIF1--chr1--+	-0.495294	-1.0391	2	0.141755	-0.0761512	0.524944	-0.297996	-0.00192488	-1.0391	0.283365	0.774067	1.2248	-1.0391	0.380548	-1.0391	0.643179	-1.0391	-1.0391	1.40779	0.687982	0.312147	-0.342467	1.45626	-0.0183332	0.169529	0.820271	-0.353661	-1.0391	-1.0391	2	1.03237	2	0.0196316	0.886879	0.622939	-0.748479	-1.0391	-0.342035	0.262139	-0.0668313	-0.0706	0.193291	1.12425	-1.0391	-0.462183	-1.0391	2	1.11462	-1.0391
ATRAID--chr2--+	0.386538	-0.50736	-0.50736	-0.50736	-0.50736	-0.50736	-0.50736	-0.50736	-0.50736	-0.50736	-0.50736	-0.50736	-0.50736	-0.50736	-0.50736	-0.50736	-0.50736	-0.50736	-0.50736	0.0539161	-0.50736	0.124616	-0.50736	0.0177195	-0.50736	0.298478	-0.50736	-0.50736	-0.50736	-0.50736	-0.50736	-0.50736	-0.50736	-0.50736	-0.50736	0.376992	-0.50736	0.638463	-0.50736	-0.50736	0.402728	1.51842	0.765978	-0.50736	-0.50736	-0.50736	-0.50736	-0.50736	-0.50736
AURKAIP1--chr1---	0.259408	1.99927	2	0.492766	0.91532	-0.591589	0.568158	-0.591589	-0.591589	-0.591589	1.19544	-0.591589	-0.591589	-0.591589	-0.591589	-0.591589	-0.591589	-0.591589	-0.591589	0.385985	-0.591589	0.498566	2	0.688678	-0.591589	1.65645	0.481048	0.618682	-0.591589	-0.591589	1.50356	0.815579	-0.591589	0.831044	1.39339	0.885704	2	0.499242	0.275532	1.45059	-0.591589	1.33697	1.06521	-0.591589	0.311223	-0.591589	2	1.60401	-0.591589
AZGP1--chr7---	1.47259	1.12179	1.206	0.667425	1.31021	1.53693	1.10831	0.829266	0.895273	0.336513	-0.148444	2	0.741922	0.082205	-1.09692	0.300339	-1.09692	2	1.25147	1.27442	0.9324	0.570253	0.975661	1.49219	1.33449	1.24883	-0.125422	0.581382	0.406346	2	1.91447	2	-1.09692	-1.09692	-0.0433813	1.41567	0.604217	1.02579	1.31996	0.740763	0.873541	0.508579	-0.0160378	1.87465	1.16786	0.386627	0.409731	-0.222734	0.260546
B2M--chr15--+	-0.541497	-0.798322	0.143292	-0.872841	-1.49441	-1.67806	-0.808032	-0.69028	-1.05673	-1.24667	-0.579756	-0.597948	-1.15847	0.373131	-2	-0.0568908	-2	0.956031	-1.64947	-0.719044	-0.865083	-0.397549	-0.0619004	-0.707933	-0.511248	-0.644522	-1.68563	-0.765568	-0.910785	-0.619753	-0.601884	-0.24482	-2	-0.398827	-1.01268	-0.727133	-0.132372	-1.07943	-0.764052	-0.760693	-1.49058	0.457936	-0.578047	-2	-1.03687	-2	-0.323792	-0.9917	-0.719529
BAAT--chr9---	0.33785	1.55539	2	2	1.60705	2	2	1.17305	2	1.65601	2	-0.582736	-0.582736	0.86748	-0.582736	-0.582736	-0.582736	-0.582736	1.5292	-0.582736	1.12707	1.04146	-0.582736	1.14528	0.621884	1.40913	1.39734	0.726503	-0.582736	-0.582736	1.10991	2	-0.582736	0.956231	1.56456	-0.0907557	-0.582736	0.597296	0.355292	-0.582736	0.354523	1.50352	0.148478	-0.582736	1.11796	-0.582736	-0.582736	-0.582736	-0.582736
BAX--chr19--+	0.311941	-0.501449	-0.501449	0.534987	-0.501449	-0.501449	-0.501449	-0.501449	-0.501449	0.678897	-0.501449	-0.501449	-0.501449	0.7799	-0.501449	-0.501449	-0.501449	2	-0.501449	0.00927646	-0.501449	-0.501449	-0.501449	-0.501449	-0.501449	-0.501449	0.523786	-0.501449	-0.501449	-0.501449	-0.501449	0.843533	-0.501449	-0.501449	-0.501449	0.625362	-0.501449	-0.501449	-0.501449	-0.501449	-0.501449	-0.501449	-0.501449	-0.501449	-0.501449	-0.501449	-0.501449	-0.501449	-0.501449
BCAS2--chr1---	0.303486	-0.481201	-0.481201	1.22272	-0.481201	-0.481201	-0.481201	-0.481201	-0.481201	-0.481201	-0.481201	-0.481201	-0.481201	0.754931	-0.481201	-0.481201	-0.481201	-0.481201	0.583586	-0.481201	-0.481201	-0.481201	-0.481201	-0.481201	-0.481201	-0.481201	-0.481201	-0.481201	-0.481201	-0.481201	-0.481201	-0.481201	-0.481201	-0.481201	-0.481201	-0.0618482	-0.481201	-0.481201	-0.481201	-0.481201	-0.481201	-0.481201	-0.481201	-0.481201	-0.481201	-0.481201	-0.481201	-0.481201	-0.481201
BGN--chrX--+	-0.349515	-0.349515	-0.349515	-0.349515	-0.349515	-0.349515	-0.349515	-0.349515	-0.349515	-0.349515	-0.349515	-0.349515	-0.349515	-0.349515	-0.349515	-0.349515	-0.349515	-0.349515	-0.349515	-0.349515	-0.349515	0.224564	-0.349515	-0.349515	-0.349515	-0.349515	-0.349515	-0.349515	-0.349515	-0.349515	-0.349515	-0.349515	-0.349515	-0.349515	-0.349515	-0.349515	-0.349515	-0.349515	-0.349515	-0.349515	-0.349515	-0.349515	-0.349515	-0.349515	-0.349515	-0.349515	-0.349515	-0.349515	-0.349515
BHLHE40--chr3--+	-0.458682	0.624945	-0.458682	-0.458682	-0.458682	0.549654	0.614328	-0.458682	-0.458682	-0.458682	-0.458682	-0.458682	-0.458682	-0.458682	-0.458682	-0.458682	-0.458682	-0.458682	-0.458682	-0.458682	-0.458682	0.54994	-0.458682	0.00381151	-0.458682	-0.458682	-0.458682	-0.458682	-0.458682	-0.458682	-0.458682	0.843244	-0.458682	-0.458682	-0.458682	0.632056	-0.458682	-0.458682	-0.458682	-0.458682	-0.458682	-0.458682	-0.458682	-0.458682	-0.458682	-0.458682	-0.458682	-0.458682	-0.458682
BHMT--chr5--+	-0.568384	-0.568384	-0.568384	0.517944	1.45955	1.29109	-0.568384	2	-0.568384	0.668782	1.22189	-0.568384	-0.568384	-0.568384	-0.568384	-0.568384	-0.568384	-0.568384	1.38746	-0.568384	2	0.523754	-0.568384	2	2	0.200175	1.85282	-0.568384	-0.568384	-0.568384	-0.568384	2	2	-0.568384	1.4202	1.64549	-0.568384	-0.568384	1.90545	0.955877	0.949969	-0.568384	1.09143	-0.568384	1.98221	-0.568384	-0.568384	2	1.01509
BLOC1S1--chr12--+	0.0197586	-0.688381	2	1.74017	0.0279507	0.218512	0.942282	-0.688381	0.592639	0.339231	1.67271	2	1.20041	-0.688381	-0.688381	2	-0.688381	-0.688381	0.272534	0.44023	1.0712	0.560992	-0.688381	0.0764813	-0.688381	-0.050002	0.204191	-0.688381	-0.688381	2	1.05506	2	-0.688381	0.495434	-0.688381	-0.688381	-0.688381	-0.688381	1.00608	-0.688381	1.36515	1.82875	0.320348	2	0.619838	-0.688381	-0.688381	-0.688381	-0.688381
BLVRB--chr19---	0.511141	-0.683728	1.70665	1.26918	0.937913	-0.683728	0.245353	0.0659828	-0.683728	0.305573	1.58933	2	-0.683728	0.390228	-0.683728	2	-0.683728	-0.683728	0.241363	0.402806	1.01025	-0.683728	1.41835	1.02672	0.208352	-0.0691488	-0.683728	-0.683728	-0.683728	-0.683728	-0.683728	1.71053	-0.683728	1.18914	-0.683728	0.908691	-0.683728	-0.683728	1.29448	0.0133898	-0.683728	0.86125	-0.142228	-0.683728	-0.683728	-0.683728	-0.683728	0.0785104	0.582498
BPTF--chr17--+	-0.414963	-0.414963	-0.414963	0.735029	-0.414963	-0.414963	-0.414963	0.577529	-0.414963	-0.414963	-0.414963	-0.414963	-0.414963	-0.414963	-0.414963	-0.414963	-0.414963	-0.414963	-0.414963	-0.414963	0.548275	-0.414963	-0.414963	0.115174	-0.414963	-0.414963	-0.414963	-0.414963	-0.414963	-0.414963	-0.414963	-0.414963	-0.414963	-0.414963	-0.414963	-0.414963	-0.414963	-0.414963	-0.414963	-0.414963	-0.414963	-0.414963	-0.414963	-0.414963	0.542497	-0.414963	-0.414963	1.33179	-0.414963
BRK1--chr3--+	1.67512	-0.516584	-0.516584	0.668557	-0.516584	-0.516584	-0.516584	-0.516584	1.16595	-0.516584	-0.516584	-0.516584	-0.516584	0.94861	-0.516584	-0.516584	-0.516584	-0.516584	-0.516584	-0.516584	0.476095	0.140982	2	0.488011	-0.516584	0.321884	-0.516584	-0.516584	-0.516584	2	0.464888	1.02137	-0.516584	2	-0.516584	0.403577	-0.516584	0.675635	-0.516584	0.434491	-0.516584	-0.516584	0.222182	-0.516584	-0.516584	-0.516584	-0.516584	1.28356	-0.516584
BST2--chr19---	-0.506384	-0.506384	-0.506384	-0.506384	-0.506384	-0.506384	-0.506384	-0.506384	-0.506384	-0.506384	-0.506384	-0.506384	-0.506384	0.61706	-0.506384	1.69977	-0.506384	-0.506384	-0.506384	-0.506384	-0.506384	-0.506384	-0.506384	-0.506384	-0.506384	-0.506384	0.392508	-0.506384	-0.506384	-0.506384	-0.506384	1.43452	-0.506384	-0.506384	-0.506384	-0.506384	-0.506384	-0.506384	-0.506384	-0.506384	-0.506384	-0.506384	-0.506384	-0.506384	-0.506384	-0.506384	1.87249	-0.506384	-0.506384
BTF3--chr5--+	-0.461877	-0.982947	0.844078	-0.982947	-0.455849	-0.982947	0.216943	0.343557	-0.982947	-0.2268	0.111258	-0.982947	-0.982947	0.377345	-0.982947	-0.982947	-0.982947	-0.982947	-0.275877	0.0499586	-0.982947	0.345188	-0.982947	0.168239	-0.982947	-0.150726	-0.982947	-0.982947	-0.982947	-0.982947	-0.433093	1.44549	-0.982947	0.448534	-0.262265	-0.261095	-0.982947	-0.315025	-0.452004	-0.0513287	-0.0549398	-0.982947	0.264008	-0.982947	-0.43015	-0.982947	-0.982947	-0.982947	-0.982947
BTG1--chr12---	-0.666999	-0.666999	1.20119	0.0119162	-0.128026	-0.666999	-0.666999	-0.0810662	-0.666999	-0.666999	-0.666999	-0.666999	-0.666999	-0.666999	-0.666999	-0.666999	-0.666999	-0.666999	-0.666999	-0.0549395	-0.666999	0.0155476	-0.666999	-0.354024	0.517189	0.740501	-0.666999	-0.666999	-0.666999	-0.666999	-0.666999	0.214029	-0.666999	-0.666999	0.0699204	-0.13988	-0.666999	-0.666999	0.607927	-0.666999	-0.124539	-0.666999	0.370323	-0.666999	-0.666999	-0.666999	-0.666999	-0.666999	-0.666999
BTG2--chr1--+	-0.503021	-0.503021	-0.503021	-0.503021	-0.503021	-0.503021	-0.503021	-0.503021	-0.503021	-0.503021	-0.503021	-0.503021	-0.503021	2	-0.503021	-0.503021	-0.503021	-0.503021	-0.503021	-0.503021	-0.503021	-0.503021	-0.503021	-0.503021	-0.503021	-0.503021	-0.503021	-0.503021	-0.503021	-0.503021	-0.503021	-0.503021	-0.503021	-0.503021	0.216103	-0.503021	-0.503021	-0.503021	-0.503021	-0.503021	-0.503021	1.34515	-0.503021	-0.503021	-0.503021	-0.503021	-0.503021	-0.503021	-0.503021
C11orf31--chr11--+	-0.157278	-0.804362	-0.804362	1.04927	-0.149792	0.0243388	1.15048	0.842941	-0.804362	0.76926	0.554462	-0.804362	0.921574	-0.804362	-0.804362	1.19741	-0.804362	2	0.68013	0.701415	-0.113736	-0.804362	-0.804362	0.625224	-0.804362	0.595732	1.03334	-0.804362	1.34928	-0.804362	0.385406	1.46819	-0.804362	1.48739	0.0906082	0.318947	1.63276	-0.804362	-0.145018	0.352556	-0.145558	0.66208	1.60285	-0.804362	-0.117879	-0.804362	-0.804362	1.20955	-0.804362
C11orf58--chr11--+	0.174723	-0.609198	-0.609198	0.389687	0.183791	-0.609198	0.459137	-0.609198	-0.609198	0.528384	-0.609198	-0.609198	-0.609198	0.625727	-0.609198	-0.609198	-0.609198	-0.609198	1.18921	-0.609198	-0.609198	-0.609198	-0.609198	-0.609198	0.416591	1.08697	-0.609198	-0.609198	-0.609198	-0.609198	0.218027	0.687055	-0.609198	-0.609198	0.475028	0.166351	-0.609198	-0.609198	-0.609198	-0.609198	-0.609198	-0.609198	0.0134642	-0.609198	0.222454	-0.609198	-0.609198	0.267288	0.846815
C12orf57--chr12--+	0.0371516	-0.615974	-0.615974	0.802264	0.540553	-0.615974	0.274112	-0.615974	-0.615974	0.331805	-0.615974	2	-0.615974	0.412907	-0.615974	-0.615974	-0.615974	-0.615974	-0.615974	0.134297	0.0811001	0.536338	1.39788	-0.232325	0.238665	-0.615974	-0.615974	-0.615974	-0.615974	-0.615974	-0.615974	0.464003	-0.615974	0.475873	-0.615974	-0.26693	2	-0.615974	0.0495264	-0.615974	-0.615974	-0.615974	0.947	-0.615974	0.076919	-0.615974	-0.615974	-0.615974	-0.615974
C14orf2--chr14---	-0.652634	-0.652634	2	0.999218	0.116875	-0.652634	1.64547	0.183921	-0.652634	-0.652634	1.88373	-0.652634	1.37637	0.545726	-0.652634	1.70064	-0.652634	2	0.379616	0.559761	-0.652634	0.689488	1.69294	0.775277	0.342782	0.0331358	0.98357	-0.652634	-0.652634	2	0.150097	0.605239	-0.652634	1.43718	-0.652634	0.099951	-0.652634	-0.652634	-0.652634	0.125236	-0.652634	1.07131	-0.652634	-0.652634	0.154393	-0.652634	2	-0.652634	-0.652634
C19orf53--chr19--+	-0.775615	-0.775615	2	0.573203	-0.147273	-0.775615	0.0709029	-0.0925273	-0.775615	0.125772	-0.775615	1.8103	0.881166	-0.775615	-0.775615	-0.775615	-0.775615	2	1.45505	0.214365	-0.112662	0.807626	2	-0.104704	0.604927	-0.215651	0.00731948	-0.775615	-0.775615	-0.775615	-0.120146	0.251499	-0.775615	0.262788	-0.775615	-0.161093	1.56385	-0.775615	0.331452	-0.775615	-0.143209	-0.775615	0.433709	-0.775615	-0.116638	-0.775615	1.29639	-0.081113	-0.775615
C19orf70--chr19---	0.228976	0.528744	-0.567654	2	-0.567654	-0.567654	1.83896	0.308403	-0.567654	0.588371	-0.567654	-0.567654	-0.567654	1.51201	-0.567654	-0.567654	-0.567654	-0.567654	1.25992	-0.067452	-0.567654	0.837844	-0.567654	0.292787	1.20289	-0.567654	-0.567654	-0.567654	2	2	-0.567654	2	-0.567654	0.764093	0.534151	0.535939	-0.567654	-0.567654	0.852155	-0.567654	-0.567654	1.2377	0.567128	-0.567654	-0.567654	-0.567654	-0.567654	0.323042	-0.567654
C1QA--chr1--+	-0.3207	-0.3207	2	-0.3207	0.90601	-0.3207	-0.3207	-0.3207	-0.3207	-0.3207	1.13404	-0.3207	-0.3207	-0.3207	-0.3207	-0.3207	-0.3207	-0.3207	-0.3207	-0.3207	1.40067	0.566748	-0.3207	-0.3207	-0.3207	-0.3207	-0.3207	-0.3207	-0.3207	-0.3207	-0.3207	-0.3207	-0.3207	-0.3207	-0.3207	-0.3207	-0.3207	-0.3207	-0.3207	-0.3207	-0.3207	-0.3207	0.229554	2	0.414241	-0.3207	-0.3207	-0.3207	-0.3207
C1QB--chr1--+	-0.363065	-0.363065	-0.363065	0.590767	-0.363065	-0.363065	-0.363065	0.460133	0.991081	-0.363065	-0.363065	-0.363065	1.63354	-0.363065	-0.363065	1.95263	-0.363065	-0.363065	-0.363065	0.106956	-0.363065	0.166161	-0.363065	-0.363065	-0.363065	-0.363065	-0.363065	-0.363065	2	-0.363065	-0.363065	-0.363065	-0.363065	0.888327	-0.363065	-0.363065	-0.363065	-0.363065	-0.363065	-0.363065	-0.363065	-0.363065	-0.363065	-0.363065	-0.363065	-0.363065	-0.363065	-0.363065	-0.363065
C1R--chr12---	1.62768	1.33005	0.502778	0.197156	1.15539	1.06988	0.548565	0.296808	-0.305594	0.866291	0.8387	1.62633	0.103168	0.0761749	-1.16716	1.02418	-1.16716	-1.16716	1.45096	0.661667	0.264198	0.896912	1.49688	1.41306	0.226208	0.0909777	0.185427	-0.0290133	2	0.787864	0.251977	0.804468	-0.239918	0.141243	1.00248	0.940595	-1.16716	1.07115	1.044	1.17016	1.81152	0.956397	0.158033	0.669485	0.257711	0.397175	0.421537	0.531036	0.661051
C1S--chr12--+	1.04388	1.52911	-1.00795	0.592501	0.847296	1.1821	0.679882	0.960989	1.09404	-0.197194	0.165277	-1.00795	0.482246	-0.127817	-1.00795	-1.00795	2	1.57279	-1.00795	0.899228	0.380307	0.210928	-1.00795	1.04849	0.233783	0.69889	-0.303736	-0.213376	-1.00795	-1.00795	1.12025	0.512598	0.739596	-1.00795	0.69961	0.701788	1.09629	0.600083	0.328929	1.26519	1.25875	0.258196	0.07978	1.14658	1.64977	-1.00795	0.855717	1.40013	1.80337
C2--chr6--+	1.27998	1.25214	2	1.69764	1.29827	2	0.463307	0.247057	1.75858	-0.656804	2	-0.656804	1.53545	-0.656804	-0.656804	-0.656804	-0.656804	-0.656804	0.458497	0.28736	0.869736	1.43814	-0.656804	0.230945	-0.656804	0.655906	-0.656804	1.30734	2	-0.656804	1.36674	1.5801	0.943371	1.60115	-0.656804	0.481814	-0.656804	-0.656804	1.72815	1.31558	1.72666	-0.656804	0.513992	2	1.37553	-0.656804	-0.656804	0.26216	0.869774
C3--chr19---	1.49863	1.13521	1.18597	1.47101	1.24853	1.34941	0.170407	1.49625	1.16157	0.861777	0.985181	-0.104834	0.731369	-0.167487	0.0686242	0.96877	0.548937	1.17038	1.47147	1.51965	1.49005	0.884051	0.731604	1.03609	0.465126	1.1761	0.514148	0.347889	1.45668	0.520954	1.05397	1.03641	1.08817	0.669223	0.876466	1.18281	0.370581	0.225	1.55207	1.55664	1.46087	0.492294	0.987279	0.819625	1.79168	0.151542	1.60731	0.610892	0.81126
C4A--chr6--+	1.47134	0.449411	1.48181	1.7181	0.779576	1.44344	-0.395792	0.887753	1.13605	1.06511	1.03599	1.01159	0.259809	0.619524	-1.08073	2	-1.08073	1.24083	1.36657	0.94607	1.02169	0.200306	0.468965	1.11802	0.389648	1.32279	0.000290632	-1.08073	-1.08073	2	1.66125	2	-0.102238	0.299988	0.455343	0.561754	1.63603	1.59263	1.49885	0.793313	1.25148	0.705764	0.317705	1.68889	1.86937	0.570065	1.37929	1.08551	1.67851
C4BPA--chr1--+	1.64159	1.4616	1.7956	2	0.540342	-0.740392	0.925111	1.80851	1.38511	1.0185	-0.740392	2	1.18875	0.398988	-0.740392	2	-0.740392	2	0.918879	0.942669	0.0315456	1.34027	-0.740392	0.857508	1.3756	0.824544	-0.740392	0.288227	-0.740392	2	0.0228307	1.22804	0.667734	0.468716	-0.740392	0.742705	1.98366	0.838369	0.548667	2	1.35702	-0.740392	2	-0.740392	0.0269154	-0.740392	-0.740392	0.0682805	0.60297
C4BPB--chr1--+	2	1.38711	-0.759057	1.99459	0.917755	2	0.201632	0.585426	0.516161	-0.759057	1.59134	2	-0.759057	1.08122	2	1.42167	-0.759057	2	0.197507	0.364443	-0.759057	0.778844	-0.759057	1.202	0.807681	1.39452	0.757177	1.4431	-0.759057	-0.759057	1.92617	2	-0.759057	0.419397	-0.759057	0.887539	1.89594	0.779679	1.28645	-0.0382224	-0.041357	0.838484	1.86336	1.95939	-0.0112026	-0.759057	2	2	0.550248
C4orf3--chr4---	-0.748219	0.190612	-0.748219	-0.748219	-0.058184	-0.748219	2	0.00193698	-0.748219	0.24167	1.52619	-0.748219	-0.748219	0.326375	-0.748219	-0.748219	-0.748219	2	0.177421	0.839143	0.518728	0.45529	-0.748219	0.27802	0.144391	-0.133275	-0.748219	0.221912	-0.748219	-0.748219	1.58637	2	-0.748219	0.392138	-0.748219	0.196773	2	0.126171	-0.0531507	0.471383	-0.748219	0.797677	0.884197	-0.748219	-0.748219	-0.748219	-0.748219	0.572031	-0.748219
C5--chr9---	1.07561	1.6104	-0.56911	0.626622	-0.56911	0.632677	-0.56911	-0.56911	2	0.792651	-0.56911	-0.56911	-0.56911	-0.56911	-0.56911	2	-0.56911	-0.56911	0.704266	0.508873	1.17379	1.08652	-0.56911	0.842656	1.51653	0.929654	0.6137	-0.56911	-0.56911	-0.56911	1.1563	2	-0.56911	-0.56911	0.728781	1.35513	-0.56911	2	1.67634	1.68283	-0.56911	-0.56911	1.25786	-0.56911	1.1645	-0.56911	-0.56911	-0.56911	-0.56911
C7--chr5--+	-0.554236	-0.554236	-0.554236	-0.554236	-0.554236	-0.554236	-0.554236	-0.554236	-0.554236	-0.554236	-0.554236	-0.554236	-0.554236	-0.554236	-0.554236	-0.554236	-0.554236	-0.554236	-0.554236	-0.554236	-0.554236	-0.554236	-0.554236	-0.554236	-0.554236	-0.554236	-0.554236	-0.554236	-0.554236	-0.554236	-0.554236	-0.554236	-0.554236	-0.554236	-0.554236	-0.554236	-0.554236	-0.554236	-0.554236	-0.554236	-0.554236	-0.554236	-0.554236	-0.554236	-0.554236	-0.554236	-0.554236	-0.554236	-0.554236
C8A--chr1--+	1.43207	0.574699	-0.629216	0.485406	-0.629216	0.491051	1.38511	1.59767	0.953202	0.640173	-0.629216	-0.629216	-0.629216	2	-0.629216	2	-0.629216	-0.629216	1.37757	-0.0799624	-0.629216	2	-0.629216	2	-0.629216	-0.629216	-0.629216	-0.629216	2	2	1.97728	1.75149	-0.629216	0.833127	1.41116	1.85267	2	1.88846	0.929824	1.46997	1.46252	-0.629216	2	2	-0.629216	-0.629216	-0.629216	1.62767	1.99978
C8B--chr1---	1.13039	1.65913	-0.680368	1.95496	0.0969553	-0.680368	1.08914	0.164681	1.57786	2	-0.680368	-0.680368	-0.680368	0.53016	-0.680368	-0.680368	-0.680368	2	1.08252	0.544338	0.139773	0.304021	-0.680368	1.45734	1.0275	1.94704	-0.680368	1.72016	1.87715	2	0.732521	2	0.815689	0.604242	1.11203	0.895341	2	-0.680368	-0.680368	0.693511	1.15714	-0.680368	0.815689	2	1.21973	-0.680368	2	2	-0.680368
C8G--chr9--+	1.43412	1.0546	2	1.43696	-0.583778	-0.583778	-0.583778	0.191972	-0.583778	0.439885	2	-0.583778	-0.583778	-0.583778	-0.583778	2	-0.583778	2	-0.583778	1.05774	1.16904	0.319885	1.59131	1.55541	1.8831	1.82817	0.933499	0.419453	1.76401	2	0.160607	2	-0.583778	0.595487	0.391873	1.57494	2	0.320446	1.46314	0.137553	1.10304	-0.583778	0.421074	-0.583778	0.719413	-0.583778	-0.583778	1.23622	1.5363
C8orf4--chr8--+	-0.498195	-0.498195	-0.498195	0.503574	-0.498195	0.508647	-0.498195	0.366374	-0.498195	-0.498195	-0.498195	-0.498195	-0.498195	1.5542	-0.498195	-0.498195	-0.498195	-0.498195	-0.498195	-0.00455241	-0.498195	0.0576283	-0.498195	0.350963	-0.498195	1.20287	-0.498195	-0.498195	-0.498195	-0.498195	0.94733	-0.498195	1.03242	-0.498195	-0.498195	-0.498195	-0.498195	-0.498195	-0.498195	-0.498195	-0.498195	1.28348	0.126265	-0.498195	-0.498195	-0.498195	-0.498195	-0.498195	-0.498195
C8orf59--chr8---	-0.508687	-0.508687	-0.508687	2	-0.508687	-0.508687	0.762033	-0.508687	-0.508687	-0.508687	-0.508687	-0.508687	-0.508687	-0.508687	-0.508687	-0.508687	-0.508687	-0.508687	-0.508687	0.562428	-0.508687	1.86794	-0.508687	0.894084	-0.508687	-0.508687	-0.508687	-0.508687	-0.508687	-0.508687	-0.508687	2	-0.508687	2	-0.508687	-0.0103787	-0.508687	-0.508687	1.72246	-0.508687	-0.508687	-0.508687	0.231932	-0.508687	0.480513	-0.508687	-0.508687	0.53384	-0.508687
C9--chr5---	1.38999	0.760093	-0.746905	1.11179	0.796505	1.48659	1.90749	1.24755	2	1.3123	-0.746905	-0.746905	-0.746905	0.275242	-0.746905	-0.746905	2	-0.746905	1.89969	1.14659	0.458206	0.906925	1.25377	2	1.52215	0.967135	-0.746905	0.175877	-0.746905	-0.746905	0.850562	2	0.516336	1.96007	-0.746905	2	1.69687	1.12059	0.40952	1.14094	0.804649	-0.746905	1.48402	1.75527	1.73363	-0.746905	-0.746905	1.27251	1.20316
CALD1--chr7--+	0.881601	-0.259694	-0.856134	1.01546	0.174708	1.02166	0.916736	0.991987	-0.0721769	-0.227257	0.588803	-0.856134	-0.856134	-0.856134	-0.856134	1.13781	-0.856134	-0.856134	0.700151	0.408528	-0.0512418	0.248457	-0.856134	1.28485	-0.289058	0.766657	0.0759905	0.49767	-0.856134	-0.856134	0.210813	1.16356	0.86787	0.334409	0.468366	0.0325041	1.48643	0.0898237	-0.856134	1.16016	0.400587	-0.856134	-0.238813	-0.856134	1.08367	-0.856134	-0.856134	0.492629	0.446315
CALM1--chr14--+	-0.611725	-1.05381	0.496258	0.212574	-0.606611	-0.487647	-0.451334	0.831474	-1.05381	-1.05381	-1.05381	-1.05381	-1.05381	0.100278	-1.05381	-1.05381	-1.05381	-1.05381	0.277195	-0.0250768	0.0446723	-0.487487	0.97476	0.176018	-0.0712669	0.457744	-1.05381	-0.425088	0.417535	-1.05381	-0.587305	1.0065	-1.05381	0.790532	-0.442373	-0.616447	0.611204	-0.0888279	-0.603349	-0.601753	-0.603719	-1.05381	-0.193124	-1.05381	0.464943	-1.05381	0.420849	-1.05381	-0.232709
CALM2--chr2---	0.598447	-0.00320223	-0.84803	0.484906	-0.84803	-0.84803	-0.0114796	-0.84803	-0.84803	-0.84803	0.440989	-0.84803	-0.84803	0.754452	-0.84803	-0.84803	-0.84803	-0.84803	-0.84803	0.130293	-0.192883	-0.84803	-0.84803	-0.487456	-0.84803	0.132362	-0.84803	0.618879	1.19497	-0.84803	-0.84803	-0.84803	-0.84803	-0.84803	0.000964134	-0.240743	-0.84803	-0.84803	-0.84803	0.249456	0.245201	-0.84803	-0.84803	-0.84803	0.285984	-0.84803	1.19957	0.340026	-0.84803
CALR--chr19--+	-0.0869107	-0.765437	-0.765437	1.17827	0.436068	-0.765437	0.159266	-0.765437	0.462013	0.219203	-0.765437	-0.765437	-0.765437	0.303459	-0.765437	-0.765437	-0.765437	-0.765437	-0.765437	-0.339392	0.494791	-0.285726	1.32674	0.25536	0.122439	0.318265	-0.765437	0.19955	-0.765437	2	-0.765437	-0.765437	-0.765437	0.368873	-0.765437	0.625913	-0.765437	-0.765437	-0.765437	-0.0716042	-0.0746214	2	-0.226489	-0.765437	-0.0455966	-0.765437	-0.765437	-0.00679051	0.494822
CAMTA1--chr1--+	0.417717	-0.502435	-0.502435	2	-0.502435	0.675976	1.61644	-0.502435	-0.502435	-0.502435	-0.502435	-0.502435	-0.502435	-0.502435	-0.502435	-0.502435	-0.502435	2	-0.502435	-0.502435	-0.502435	1.12099	2	0.0380666	0.701618	0.327071	0.657368	-0.502435	-0.502435	-0.502435	-0.502435	1.01908	-0.502435	-0.502435	-0.502435	-0.502435	-0.502435	-0.502435	-0.502435	0.438475	0.434383	-0.502435	-0.502435	-0.502435	-0.502435	-0.502435	-0.502435	-0.502435	-0.502435
CANX--chr5--+	-0.540733	0.672826	-0.540733	-0.540733	-0.540733	-0.540733	1.48973	0.42894	1.05436	-0.540733	-0.540733	-0.540733	-0.540733	0.848318	-0.540733	-0.540733	-0.540733	-0.540733	-0.540733	0.472178	0.400358	-0.540733	-0.540733	-0.0227843	0.61308	0.254161	-0.540733	-0.540733	-0.540733	-0.540733	0.389734	-0.540733	-0.540733	-0.540733	-0.540733	-0.540733	2	-0.540733	-0.540733	0.360916	-0.540733	-0.540733	-0.540733	-0.540733	1.08823	-0.540733	-0.540733	0.445143	-0.540733
CAPZB--chr1---	-0.485326	-0.485326	-0.485326	-0.485326	-0.485326	-0.485326	-0.485326	-0.485326	-0.485326	-0.485326	-0.485326	-0.485326	-0.485326	-0.485326	-0.485326	-0.485326	-0.485326	-0.485326	-0.485326	0.076601	-0.485326	-0.485326	-0.485326	0.481294	-0.485326	-0.485326	-0.485326	-0.485326	-0.485326	-0.485326	0.459045	0.994495	-0.485326	-0.485326	1.60213	-0.485326	-0.485326	-0.485326	-0.485326	0.429797	-0.485326	-0.485326	0.225514	-0.485326	-0.485326	-0.485326	-0.485326	-0.485326	-0.485326
CARD16--chr11---	-0.483464	-0.483464	-0.483464	-0.483464	-0.483464	-0.483464	-0.483464	-0.483464	-0.483464	-0.483464	-0.483464	-0.483464	-0.483464	-0.483464	-0.483464	-0.483464	-0.483464	-0.483464	-0.483464	-0.483464	-0.483464	-0.483464	-0.483464	-0.483464	-0.483464	-0.483464	-0.483464	-0.483464	-0.483464	-0.483464	-0.483464	-0.483464	-0.483464	-0.483464	-0.483464	-0.483464	-0.483464	-0.483464	-0.483464	-0.483464	-0.483464	1.46935	-0.483464	-0.483464	-0.483464	-0.483464	-0.483464	-0.483464	-0.483464
CARHSP1--chr16---	-0.594151	-0.594151	-0.594151	-0.594151	-0.594151	-0.594151	-0.594151	0.319598	-0.594151	0.611611	2	-0.594151	-0.594151	0.714789	-0.594151	-0.594151	-0.594151	2	-0.594151	1.33938	-0.594151	0.871817	1.96787	1.24154	-0.594151	-0.594151	0.45316	-0.594151	2	2	-0.594151	2	-0.594151	-0.594151	1.94535	0.22788	-0.594151	-0.594151	0.252497	-0.594151	0.885661	1.28887	0.06583	-0.594151	-0.594151	-0.594151	-0.594151	0.334866	-0.594151
CAST--chr5--+	-0.562125	0.673045	-0.562125	-0.562125	-0.562125	1.39531	0.660943	0.424816	-0.562125	0.740219	1.32247	-0.562125	-0.562125	-0.562125	-0.562125	-0.562125	-0.562125	-0.562125	-0.562125	0.00138792	1.10473	0.0723697	2	0.788043	0.612235	-0.562125	-0.562125	-0.562125	-0.562125	-0.562125	0.384911	-0.562125	-0.562125	1.90338	0.679137	0.681151	-0.562125	-0.562125	0.35234	-0.562125	-0.562125	-0.562125	0.150721	-0.562125	-0.562125	-0.562125	-0.562125	0.441307	2
CBWD5--chr9--+	-0.501538	-0.501538	-0.501538	-0.501538	-0.501538	-0.501538	1.49581	-0.501538	-0.501538	-0.501538	-0.501538	-0.501538	-0.501538	0.864862	-0.501538	-0.501538	-0.501538	-0.501538	-0.501538	0.494856	1.10945	-0.501538	-0.501538	0.00796485	0.633461	-0.501538	-0.501538	-0.501538	-0.501538	2	1.09328	-0.501538	-0.501538	0.948484	-0.501538	-0.0379916	-0.501538	-0.501538	-0.501538	0.385409	0.381552	1.46415	-0.501538	-0.501538	0.418655	-0.501538	-0.501538	0.468262	-0.501538
CCDC152--chr5--+	2	0.252133	-0.727423	0.818081	0.532885	-0.727423	1.42272	1.46033	-0.727423	0.305406	0.767161	2	-0.727423	-0.727423	-0.727423	1.47434	2	-0.727423	-0.727423	0.0901739	1.04109	0.184331	-0.727423	1.25255	1.35482	1.70612	0.80344	0.97342	-0.727423	-0.727423	0.581214	0.449466	-0.727423	1.7933	0.932717	1.59855	1.95319	1.32107	-0.00220383	-0.727423	0.54015	-0.727423	1.49879	-0.727423	1.03248	-0.727423	-0.727423	-0.727423	0.594514
CCL14--chr17---	-0.405477	-0.405477	-0.405477	-0.405477	-0.405477	-0.405477	-0.405477	-0.405477	-0.405477	-0.405477	-0.405477	-0.405477	-0.405477	-0.405477	-0.405477	-0.405477	-0.405477	-0.405477	-0.405477	-0.405477	0.099631	-0.405477	-0.405477	-0.405477	-0.405477	-0.405477	-0.405477	0.267588	-0.405477	-0.405477	-0.405477	0.377087	-0.405477	-0.405477	-0.405477	-0.152556	-0.405477	-0.405477	-0.405477	-0.405477	-0.405477	-0.405477	-0.405477	-0.405477	-0.405477	-0.405477	-0.405477	0.123668	-0.405477
CCL20--chr2--+	-0.42937	-0.42937	-0.42937	-0.42937	-0.42937	-0.42937	-0.42937	-0.42937	-0.42937	-0.42937	-0.42937	-0.42937	-0.42937	-0.42937	-0.42937	2	-0.42937	-0.42937	-0.42937	-0.42937	-0.42937	-0.42937	-0.42937	-0.42937	-0.42937	-0.42937	-0.42937	-0.42937	-0.42937	-0.42937	-0.42937	-0.42937	-0.42937	-0.42937	-0.42937	-0.42937	-0.42937	-0.42937	-0.42937	0.39953	-0.42937	-0.42937	-0.42937	-0.42937	-0.42937	-0.42937	-0.42937	-0.42937	-0.42937
CCL21--chr9---	-0.175854	-0.175854	-0.175854	-0.175854	-0.175854	-0.175854	-0.175854	-0.175854	-0.175854	-0.175854	-0.175854	-0.175854	-0.175854	-0.175854	-0.175854	-0.175854	-0.175854	-0.175854	1.05695	-0.175854	-0.175854	-0.175854	-0.175854	-0.175854	-0.175854	-0.175854	-0.175854	-0.175854	-0.175854	-0.175854	-0.175854	-0.175854	-0.175854	-0.175854	-0.175854	-0.175854	-0.175854	-0.175854	-0.175854	-0.175854	-0.175854	-0.175854	-0.175854	-0.175854	-0.175854	-0.175854	-0.175854	-0.175854	-0.175854
CCL3--chr17---	-0.322382	-0.322382	-0.322382	-0.322382	-0.322382	-0.322382	-0.322382	-0.322382	-0.322382	-0.322382	-0.322382	-0.322382	-0.322382	-0.322382	-0.322382	-0.322382	-0.322382	-0.322382	-0.322382	-0.322382	-0.322382	-0.322382	-0.322382	-0.322382	-0.322382	-0.322382	-0.322382	-0.322382	-0.322382	-0.322382	0.365804	-0.322382	-0.322382	-0.322382	-0.322382	-0.322382	-0.322382	-0.322382	-0.322382	-0.322382	-0.322382	-0.322382	-0.322382	-0.322382	-0.322382	-0.322382	-0.322382	-0.322382	-0.322382
CCL4--chr17--+	-0.389035	-0.389035	-0.389035	-0.389035	-0.389035	-0.389035	-0.389035	-0.389035	-0.389035	-0.389035	-0.389035	-0.389035	-0.389035	-0.389035	-0.389035	-0.389035	-0.389035	-0.389035	-0.389035	-0.389035	-0.389035	-0.389035	-0.389035	-0.389035	-0.389035	-0.389035	-0.389035	-0.389035	-0.389035	-0.389035	-0.389035	-0.389035	-0.389035	-0.389035	-0.389035	-0.389035	-0.389035	-0.389035	-0.389035	-0.389035	-0.389035	-0.389035	-0.389035	-0.389035	-0.389035	-0.389035	-0.389035	-0.389035	-0.389035
CCL4L1--chr17--+	-0.297967	-0.297967	-0.297967	-0.297967	-0.297967	-0.297967	-0.297967	-0.297967	-0.297967	-0.297967	-0.297967	-0.297967	-0.297967	-0.297967	-0.297967	-0.297967	-0.297967	-0.297967	-0.297967	-0.297967	-0.297967	-0.297967	-0.297967	-0.297967	-0.297967	-0.297967	-0.297967	-0.297967	-0.297967	-0.297967	-0.297967	-0.297967	-0.297967	-0.297967	-0.297967	-0.297967	-0.297967	-0.297967	-0.297967	0.471303	-0.297967	-0.297967	-0.297967	-0.297967	-0.297967	-0.297967	-0.297967	-0.297967	-0.297967
CCL5--chr17---	-0.43432	-0.43432	-0.43432	-0.43432	-0.43432	-0.43432	-0.43432	-0.43432	-0.43432	-0.43432	-0.43432	-0.43432	-0.43432	-0.43432	-0.43432	-0.43432	-0.43432	-0.43432	-0.43432	-0.43432	-0.43432	-0.43432	-0.43432	-0.43432	-0.43432	-0.43432	-0.43432	-0.43432	-0.43432	-0.43432	-0.43432	-0.43432	-0.43432	-0.43432	-0.43432	-0.43432	-0.43432	-0.43432	-0.43432	-0.43432	-0.43432	-0.43432	-0.43432	-0.43432	-0.43432	-0.43432	-0.43432	-0.43432	-0.43432
CCND1--chr11--+	-0.47871	-0.47871	-0.47871	-0.47871	-0.47871	-0.47871	0.625302	-0.47871	-0.47871	0.696862	-0.47871	-0.47871	-0.47871	-0.47871	-0.47871	-0.47871	-0.47871	-0.47871	-0.47871	0.451884	-0.47871	-0.47871	2	1.31102	-0.47871	-0.47871	-0.47871	-0.47871	-0.47871	-0.47871	-0.47871	-0.47871	-0.47871	0.875555	-0.47871	0.643543	-0.47871	0.559698	-0.47871	0.349664	-0.47871	-0.47871	-0.47871	-0.47871	-0.47871	-0.47871	-0.47871	-0.47871	-0.47871
CCNL1--chr3---	-0.526898	-0.526898	-0.526898	-0.526898	-0.526898	-0.526898	1.35224	-0.526898	-0.526898	-0.526898	-0.526898	-0.526898	-0.526898	1.60345	-0.526898	-0.526898	-0.526898	-0.526898	-0.526898	-0.526898	-0.526898	-0.526898	-0.526898	-0.0475494	0.540927	-0.526898	-0.526898	-0.526898	-0.526898	-0.526898	0.973532	-0.526898	-0.526898	-0.526898	0.60176	-0.526898	-0.526898	-0.526898	-0.526898	-0.526898	-0.526898	-0.526898	-0.526898	-0.526898	0.338835	-0.526898	-0.526898	-0.526898	-0.526898
CCT4--chr2---	-0.419896	1.67492	-0.419896	0.729371	-0.419896	-0.419896	0.809276	-0.419896	-0.419896	-0.419896	-0.419896	-0.419896	-0.419896	-0.419896	-0.419896	-0.419896	-0.419896	-0.419896	-0.419896	-0.419896	-0.419896	-0.419896	-0.419896	0.109907	-0.419896	-0.419896	-0.419896	-0.419896	-0.419896	-0.419896	-0.419896	-0.419896	-0.419896	-0.419896	0.82756	-0.419896	-0.419896	-0.419896	-0.419896	-0.419896	-0.419896	-0.419896	-0.419896	-0.419896	-0.419896	-0.419896	-0.419896	-0.419896	-0.419896
CD14--chr5---	0.0998446	0.356692	-0.582726	0.899451	0.625941	-0.582726	-0.582726	-0.582726	-0.582726	-0.582726	-0.582726	-0.582726	-0.582726	1.72639	-0.582726	-0.582726	-0.582726	-0.582726	0.343494	1.58506	-0.582726	0.291669	1.52192	1.48718	0.310443	0.0326028	-0.582726	0.388013	-0.582726	2	0.13755	1.27494	-0.582726	1.29243	-0.582726	1.78078	-0.582726	-0.582726	1.3979	0.637639	-0.582726	-0.582726	-0.582726	2	0.141405	-0.582726	-0.582726	-0.582726	0.685045
CD2--chr1--+	-0.315451	-0.315451	-0.315451	-0.315451	-0.315451	-0.315451	-0.315451	-0.315451	-0.315451	-0.315451	-0.315451	-0.315451	-0.315451	-0.315451	-0.315451	-0.315451	-0.315451	-0.315451	-0.315451	-0.315451	-0.315451	-0.315451	-0.315451	-0.315451	-0.315451	-0.315451	-0.315451	-0.315451	-0.315451	-0.315451	-0.315451	-0.315451	-0.315451	-0.315451	-0.315451	-0.315451	-0.315451	-0.315451	-0.315451	-0.315451	-0.315451	-0.315451	0.419535	-0.315451	-0.315451	-0.315451	-0.315451	-0.315451	-0.315451
CD37--chr19--+	0.364259	-0.392244	-0.392244	-0.392244	-0.392244	-0.392244	-0.392244	-0.392244	-0.392244	-0.392244	-0.392244	-0.392244	-0.392244	-0.392244	-0.392244	-0.392244	-0.392244	-0.392244	-0.392244	-0.392244	-0.392244	-0.392244	-0.392244	-0.392244	-0.392244	-0.392244	-0.392244	-0.392244	-0.392244	-0.392244	-0.392244	-0.392244	-0.392244	-0.392244	-0.392244	-0.392244	-0.392244	-0.392244	-0.392244	-0.392244	-0.392244	-0.392244	-0.392244	-0.392244	-0.392244	-0.392244	-0.392244	-0.392244	-0.392244
CD3D--chr11---	-0.377427	-0.377427	-0.377427	-0.377427	-0.377427	-0.377427	-0.377427	-0.377427	-0.377427	-0.377427	-0.377427	-0.377427	-0.377427	-0.377427	-0.377427	-0.377427	-0.377427	-0.377427	-0.377427	-0.377427	-0.377427	-0.377427	-0.377427	-0.377427	-0.377427	-0.377427	-0.377427	-0.377427	-0.377427	-0.377427	-0.377427	-0.377427	-0.377427	-0.377427	-0.377427	-0.377427	-0.377427	-0.377427	-0.377427	-0.377427	-0.377427	-0.377427	-0.377427	-0.377427	-0.377427	-0.377427	-0.377427	-0.377427	-0.377427
CD44--chr11--+	-0.418708	-0.418708	-0.418708	-0.418708	-0.418708	-0.418708	-0.418708	-0.418708	-0.418708	-0.418708	-0.418708	-0.418708	-0.418708	-0.418708	-0.418708	-0.418708	-0.418708	-0.418708	-0.418708	-0.418708	-0.418708	-0.418708	-0.418708	-0.418708	-0.418708	0.265257	-0.418708	-0.418708	-0.418708	-0.418708	-0.418708	-0.418708	-0.418708	-0.418708	-0.418708	-0.418708	-0.418708	-0.418708	-0.418708	-0.418708	-0.418708	-0.418708	-0.418708	-0.418708	-0.418708	-0.418708	-0.418708	-0.418708	-0.418708
CD52--chr1--+	-0.447127	-0.447127	-0.447127	-0.447127	-0.447127	-0.447127	-0.447127	-0.447127	-0.447127	-0.447127	-0.447127	-0.447127	-0.447127	-0.447127	-0.447127	-0.447127	-0.447127	-0.447127	-0.447127	-0.447127	-0.447127	-0.447127	-0.447127	-0.447127	-0.447127	-0.447127	-0.447127	-0.447127	-0.447127	-0.447127	-0.447127	-0.447127	-0.447127	-0.447127	-0.447127	-0.447127	-0.447127	-0.447127	-0.447127	-0.447127	-0.447127	-0.447127	-0.447127	-0.447127	-0.447127	-0.447127	-0.447127	-0.447127	-0.447127
CD59--chr11---	0.14723	-0.625345	2	0.359083	-0.625345	0.364068	0.427527	0.848148	-0.625345	-0.625345	-0.625345	-0.625345	-0.625345	-0.625345	-0.625345	-0.625345	-0.625345	-0.625345	-0.625345	1.17245	0.809558	-0.625345	1.75682	-0.625345	0.385597	0.0711214	-0.625345	-0.625345	-0.625345	-0.625345	-0.625345	0.652147	-0.625345	0.666187	0.443189	0.138979	-0.625345	-0.625345	1.2233	-0.625345	-0.625345	1.12549	-0.625345	-0.625345	-0.625345	-0.625345	1.95174	0.869928	-0.625345
CD63--chr12---	-1.20938	0.0383676	0.880235	-0.319436	-1.20938	-1.20938	-0.650851	-1.20938	-0.00497796	-1.20938	0.157102	-1.20938	-0.116243	0.639887	-1.20938	-1.20938	1.19703	-1.20938	-0.269164	-0.39697	-0.191021	-0.31527	0.054313	0.128397	-1.20938	-1.20938	-0.327866	-0.626519	0.792945	-1.20938	-0.200365	0.487235	-1.20938	-1.20938	-0.253425	-0.145125	-1.20938	-1.20938	-0.791779	-1.20938	-0.229365	0.903729	-0.411473	-1.20938	-1.20938	-1.20938	0.157718	-1.20938	0.0223512
CD69--chr12---	-0.498448	-0.498448	-0.498448	-0.498448	-0.498448	-0.498448	-0.498448	-0.498448	-0.498448	-0.498448	-0.498448	-0.498448	-0.498448	-0.498448	-0.498448	-0.498448	-0.498448	-0.498448	-0.498448	-0.498448	-0.498448	-0.498448	-0.498448	-0.498448	-0.498448	-0.498448	-0.498448	-0.498448	-0.498448	-0.498448	-0.498448	-0.498448	-0.498448	-0.498448	-0.498448	-0.498448	-0.498448	-0.498448	-0.498448	-0.498448	-0.498448	-0.498448	0.014808	-0.498448	-0.498448	-0.498448	-0.498448	-0.498448	-0.498448
CD74--chr5---	-0.383086	-0.74568	-0.74568	-0.283657	-0.74568	-0.74568	-0.251533	-0.74568	-0.74568	-0.74568	0.0157383	-0.74568	-0.74568	0.200899	-0.74568	-0.74568	-0.74568	-0.74568	-0.74568	-0.329154	-0.74568	-0.281185	-0.74568	-0.354042	-0.74568	-0.74568	-0.74568	-0.74568	-0.74568	-0.74568	-0.363056	-0.74568	-0.74568	-0.74568	-0.74568	-0.74568	-0.74568	-0.74568	-0.376216	-0.74568	-0.74568	0.543185	-0.74568	-0.74568	-0.74568	-0.74568	-0.74568	-0.74568	-0.74568
CD81--chr11--+	-0.010576	0.246557	1.70205	1.26356	-0.693906	-0.693906	0.879627	0.609376	-0.693906	-0.693906	0.741032	2	-0.693906	-0.693906	-0.693906	-0.693906	-0.693906	2	-0.693906	0.660645	0.0354049	0.796866	-0.693906	0.815757	-0.693906	0.397468	0.167395	0.277912	1.58037	2	-0.693906	0.436016	-0.693906	0.448434	-0.693906	-0.0178738	1.87973	0.182005	0.94119	0.00483873	0.523081	-0.693906	0.279482	1.94123	1.65365	-0.693906	1.58549	0.628639	-0.693906
CD9--chr12--+	1.03965	-0.498903	-0.498903	-0.498903	-0.498903	-0.498903	0.697414	-0.498903	-0.498903	-0.498903	-0.498903	-0.498903	-0.498903	-0.498903	-0.498903	-0.498903	-0.498903	-0.498903	-0.498903	-0.498903	-0.498903	-0.498903	-0.498903	0.016739	-0.498903	-0.498903	-0.498903	-0.498903	-0.498903	-0.498903	-0.498903	-0.498903	-0.498903	-0.498903	-0.498903	-0.0297712	-0.498903	-0.498903	-0.498903	-0.498903	-0.498903	1.49047	-0.498903	-0.498903	-0.498903	-0.498903	-0.498903	-0.498903	-0.498903
CD99--chrX--+	-0.522598	-0.522598	-0.522598	-0.522598	-0.522598	-0.522598	-0.522598	-0.522598	-0.522598	-0.522598	2	-0.522598	1.64641	-0.522598	-0.522598	2	-0.522598	-0.522598	-0.522598	0.411557	-0.522598	0.0523254	-0.522598	0.35574	-0.522598	1.6256	-0.522598	-0.522598	-0.522598	-0.522598	-0.522598	-0.522598	-0.522598	-0.522598	-0.522598	-0.522598	-0.522598	-0.522598	-0.522598	-0.522598	0.30533	-0.522598	-0.522598	-0.522598	0.340116	-0.522598	-0.522598	-0.522598	-0.522598
CDC37--chr19---	-0.42407	-0.42407	-0.42407	-0.42407	-0.42407	-0.42407	0.830138	-0.42407	-0.42407	-0.42407	-0.42407	-0.42407	-0.42407	-0.42407	-0.42407	-0.42407	-0.42407	-0.42407	-0.42407	-0.42407	-0.42407	-0.42407	-0.42407	-0.42407	-0.42407	-0.42407	-0.42407	-0.42407	-0.42407	-0.42407	0.547078	-0.42407	1.36767	-0.42407	-0.42407	-0.42407	-0.42407	-0.42407	-0.42407	-0.42407	-0.42407	-0.42407	-0.42407	-0.42407	-0.42407	-0.42407	-0.42407	-0.42407	-0.42407
CDC42--chr1--+	-0.564823	-0.564823	1.94162	0.346038	-0.564823	-0.564823	-0.564823	-0.564823	-0.564823	-0.564823	-0.564823	-0.564823	-0.564823	-0.564823	-0.564823	1.64655	-0.564823	-0.564823	-0.564823	-0.564823	-0.564823	-0.564823	-0.564823	0.207276	-0.564823	-0.564823	-0.564823	-0.564823	-0.564823	-0.564823	0.189505	-0.564823	-0.564823	-0.564823	-0.564823	-0.182797	-0.564823	-0.564823	-0.564823	-0.564823	-0.564823	-0.564823	-0.564823	2	0.193542	-0.564823	-0.564823	-0.564823	-0.564823
CES1--chr16---	2	1.05827	2	-0.0622168	1.23305	1.31001	-0.00614267	1.07683	0.991328	1.13999	0.460404	1.76626	-0.868722	0.128363	2	-0.868722	-0.868722	-0.868722	1.71298	1.14145	1.77897	-0.421239	1.0829	0.89206	1.3447	0.500773	1.28465	0.0314351	1.23785	1.72942	-0.868722	2	1.11104	0.870093	2	0.429154	-0.868722	-0.0574001	0.645803	0.972833	0.966747	0.56567	0.363546	1.5721	0.696347	1.21022	-0.868722	0.764286	1.03353
CFB--chr6--+	1.82093	1.9367	1.54738	1.1771	0.874724	1.08732	0.143292	0.785988	0.712167	1.15335	-1.38248	1.90181	0.34183	0.714642	-1.38248	0.566251	-1.38248	2	1.35481	1.73001	0.74869	1.03651	1.96077	1.74597	-0.828264	1.34539	0.25959	0.581976	0.686796	1.53268	0.625836	1.55055	0.584019	1.23753	1.19278	1.74084	1.69022	1.35939	1.4529	1.39876	1.66379	1.24444	0.815264	0.250825	0.841753	-1.38248	1.71162	1.00277	1.82408
CFH--chr1--+	0.759295	1.03476	-1.32025	0.705568	0.176313	-0.189118	-0.613483	0.71097	0.967182	-0.567673	0.863932	0.838754	0.063012	0.033619	1.07385	-1.32025	-1.32025	1.0753	0.241163	0.865209	0.849175	0.927318	-1.32025	1.10198	0.196989	0.774298	-0.204777	-0.0809202	0.405797	1.6869	1.13886	1.09672	-0.310574	0.516488	0.822843	1.23759	1.4831	1.11705	1.34155	0.188653	0.40984	0.523181	-0.310574	0.679674	1.51746	-1.32025	2	0.528917	0.23839
CFHR1--chr1--+	1.27223	0.180867	2	1.47419	1.12225	0.794567	1.15012	1.0546	0.518595	-0.296765	0.0588329	-1.09215	0.369792	0.762084	-1.09215	-1.09215	-1.09215	1.43966	1.14353	1.01253	-0.507158	-0.390004	-1.09215	0.81501	0.824607	0.582328	0.464459	0.217673	2	1.15776	0.541046	0.399568	-0.025043	-0.175863	0.583034	1.54595	0.972192	1.05772	0.219382	0.74206	1.45127	1.73388	0.946862	1.02153	0.547645	0.708145	1.59066	-0.47932	0.555145
CFHR2--chr1--+	-0.046159	0.210625	-0.728561	0.140967	1.7973	0.145371	1.33297	1.00865	-0.728561	0.261703	0.704428	-0.728561	2	-0.728561	-0.728561	2	2	2	0.19743	1.07084	0.538865	1.23454	-0.728561	0.298066	0.788102	1.60469	0.131571	0.241938	1.54262	-0.728561	-0.00846288	2	-0.728561	1.14613	-0.728561	1.20758	1.84158	-0.728561	0.487662	1.55506	0.903222	0.81792	0.904473	-0.728561	1.6158	-0.728561	1.54774	1.03206	0.538897
CFI--chr4---	2	1.89777	-0.65498	-0.65498	0.193199	1.17381	-0.65498	-0.65498	-0.65498	0.561773	-0.65498	-0.65498	2	2	-0.65498	-0.65498	-0.65498	-0.65498	-0.65498	1.29618	0.902327	0.419139	-0.65498	0.91891	0.4422	1.15923	1.1485	-0.65498	-0.65498	-0.65498	-0.65498	2	-0.65498	-0.65498	0.504705	0.506587	2	1.17526	0.199386	0.202413	0.198685	1.24521	0.0110173	-0.65498	1.41832	-0.65498	-0.65498	-0.65498	-0.65498
CFL1--chr11---	-0.796957	-0.796957	-0.796957	-0.117381	-0.796957	-0.796957	-0.0701318	-0.210454	-0.796957	-0.0230208	0.322989	-0.796957	-0.796957	-0.796957	-0.796957	-0.796957	-0.796957	-0.796957	-0.796957	-0.796957	-0.227741	-0.4199	-0.796957	-0.796957	-0.796957	-0.796957	-0.796957	-0.796957	-0.796957	-0.796957	-0.796957	-0.796957	-0.796957	-0.796957	-0.796957	-0.796957	1.21172	-0.796957	-0.796957	-0.251598	-0.796957	-0.796957	-0.037243	1.25973	-0.796957	-0.796957	-0.796957	-0.796957	-0.796957
CHCHD2--chr7---	-0.0300059	-0.539736	0.567992	0.528044	0.471442	-0.589466	1.28364	-0.263607	-0.314707	0.394977	0.478499	-1.25549	-1.25549	-1.25549	-1.25549	0.353326	-1.25549	1.14676	0.865781	-0.0453021	0.0367501	-1.25549	0.348065	-0.106537	0.265992	-0.130239	-0.599983	0.369135	1.28535	-1.25549	0.52438	1.60166	-1.25549	0.173215	-1.25549	0.0949895	-1.25549	-0.588864	-0.0110738	-0.7237	-0.329283	0.593095	0.371191	0.750026	-0.703766	0.452679	-1.25549	-0.248946	-0.28956
CHD2--chr15--+	-0.457125	-0.457125	-0.457125	-0.457125	-0.457125	-0.457125	-0.457125	-0.457125	-0.457125	0.875198	-0.457125	-0.457125	-0.457125	-0.457125	-0.457125	-0.457125	-0.457125	2	-0.457125	-0.457125	0.522774	-0.457125	-0.457125	0.0821821	-0.457125	-0.457125	1.51765	0.848606	-0.457125	-0.457125	-0.457125	-0.457125	-0.457125	1.07772	-0.457125	-0.457125	-0.457125	-0.457125	1.17921	-0.457125	0.477623	1.62355	0.850715	-0.457125	-0.457125	-0.457125	-0.457125	0.569405	-0.457125
CHMP2A--chr19---	0.224373	-0.61354	-0.61354	-0.61354	1.37959	0.45955	0.528377	-0.61354	1.84887	-0.61354	-0.61354	-0.61354	-0.61354	1.5739	-0.61354	1.97857	-0.61354	-0.61354	0.523473	-0.61354	-0.61354	-0.61354	1.97009	-0.121346	-0.61354	-0.61354	0.442606	0.578124	-0.61354	-0.61354	-0.61354	0.771994	-0.61354	1.68837	-0.61354	0.215425	2	-0.61354	-0.61354	-0.61354	0.239549	-0.61354	-0.61354	-0.61354	-0.61354	-0.61354	-0.61354	1.00819	-0.61354
CHMP4A--chr14---	-0.442302	-0.442302	-0.442302	-0.442302	0.47471	-0.442302	-0.442302	0.554607	1.19759	-0.442302	-0.442302	-0.442302	-0.442302	0.985763	-0.442302	-0.442302	-0.442302	-0.442302	-0.442302	-0.442302	0.525222	-0.442302	-0.442302	1.25932	-0.442302	0.374919	-0.442302	-0.442302	-0.442302	-0.442302	-0.442302	-0.442302	-0.442302	-0.442302	-0.442302	-0.442302	-0.442302	-0.442302	-0.442302	1.17847	-0.442302	-0.442302	-0.442302	-0.442302	-0.442302	-0.442302	-0.442302	-0.442302	-0.442302
CHURC1--chr14--+	0.429308	-0.49367	-0.49367	-0.49367	-0.49367	-0.49367	1.63171	-0.49367	-0.49367	-0.49367	1.44451	-0.49367	-0.49367	-0.49367	2	-0.49367	-0.49367	-0.49367	-0.49367	-0.49367	0.491415	0.688695	-0.49367	-0.49367	0.71408	-0.49367	0.669695	-0.49367	2	-0.49367	-0.49367	1.03252	-0.49367	-0.49367	-0.49367	0.419451	2	-0.49367	0.446796	-0.49367	0.446025	1.59801	0.239444	-0.49367	-0.49367	-0.49367	-0.49367	-0.49367	-0.49367
CIB1--chr15---	-0.00274651	-0.698492	2	-0.698492	0.00530219	-0.698492	-0.698492	-0.698492	-0.698492	-0.698492	-0.698492	-0.698492	-0.698492	-0.698492	-0.698492	-0.698492	-0.698492	2	-0.698492	0.100738	-0.698492	-0.698492	1.44678	-0.698492	-0.698492	-0.0712862	-0.698492	-0.698492	-0.698492	-0.698492	-0.698492	0.45196	-0.698492	0.464604	0.263781	0.265343	1.9219	0.82019	0.0104359	-0.698492	0.00985459	0.878229	0.292582	-0.698492	-0.698492	-0.698492	-0.698492	0.648083	-0.698492
CIRBP--chr19--+	0.453741	-0.665401	-0.665401	-0.665401	-0.665401	-0.665401	0.204797	-0.665401	-0.665401	0.261202	-0.665401	-0.665401	-0.665401	-0.665401	-0.665401	-0.665401	-0.665401	-0.665401	0.201061	0.352272	-0.665401	-0.213966	-0.665401	-0.665401	-0.665401	-0.665401	0.139435	-0.665401	-0.665401	-0.665401	-0.665401	-0.665401	-0.665401	0.40205	-0.665401	0.219175	-0.665401	-0.665401	-0.665401	-0.665401	-0.665401	-0.665401	-0.665401	-0.665401	0.913493	-0.665401	-0.665401	0.0485291	-0.665401
CKLF--chr16--+	-0.394228	-0.394228	-0.394228	-0.394228	-0.394228	-0.394228	-0.394228	-0.394228	-0.394228	-0.394228	1.52716	-0.394228	-0.394228	-0.394228	-0.394228	-0.394228	-0.394228	-0.394228	-0.394228	-0.394228	-0.394228	-0.394228	-0.394228	-0.394228	0.803061	-0.394228	-0.394228	-0.394228	-0.394228	-0.394228	-0.394228	-0.394228	-0.394228	-0.394228	-0.394228	-0.394228	-0.394228	-0.394228	-0.394228	-0.394228	-0.394228	1.67934	-0.394228	-0.394228	-0.394228	-0.394228	-0.394228	0.628796	-0.394228
CLEC2B--chr12---	-0.468007	-0.468007	-0.468007	-0.468007	-0.468007	-0.468007	-0.468007	-0.468007	-0.468007	0.614527	-0.468007	-0.468007	-0.468007	-0.468007	-0.468007	-0.468007	-0.468007	-0.468007	-0.468007	-0.468007	-0.468007	-0.468007	-0.468007	-0.468007	-0.468007	-0.468007	-0.468007	-0.468007	-0.468007	-0.468007	-0.468007	-0.468007	-0.468007	-0.468007	-0.468007	-0.468007	-0.468007	-0.468007	-0.468007	-0.468007	-0.468007	-0.468007	-0.468007	-0.468007	-0.468007	-0.468007	-0.468007	-0.468007	-0.468007
CLEC3B--chr3--+	-0.363714	-0.363714	-0.363714	-0.363714	-0.363714	-0.363714	-0.363714	-0.363714	-0.363714	-0.363714	1.09034	-0.363714	-0.363714	0.727086	-0.363714	-0.363714	-0.363714	-0.363714	-0.363714	-0.363714	-0.363714	-0.363714	-0.363714	-0.363714	0.542358	-0.363714	-0.363714	-0.363714	-0.363714	-0.363714	-0.363714	-0.363714	-0.363714	-0.363714	-0.363714	-0.363714	-0.363714	-0.363714	-0.363714	-0.363714	-0.363714	-0.363714	-0.363714	-0.363714	-0.363714	-0.363714	-0.363714	-0.363714	-0.363714
CLIC1--chr6---	-0.817246	-0.817246	1.05872	-0.135505	-0.817246	-0.817246	-0.0881051	-0.228874	-0.817246	-0.817246	-0.817246	-0.817246	-0.817246	-0.817246	-0.817246	-0.817246	-0.817246	-0.817246	-0.817246	-0.202639	-0.817246	-0.817246	0.832462	-0.817246	-0.117143	-0.817246	-0.817246	-0.817246	-0.817246	-0.817246	-0.252663	-0.817246	-0.817246	-0.817246	-0.817246	-0.287932	-0.817246	-0.817246	-0.817246	-0.817246	-0.817246	1.5683	-0.817246	-0.817246	-0.817246	-0.817246	-0.817246	-0.817246	-0.817246
CLK1--chr2---	-0.487451	-0.487451	-0.487451	-0.487451	-0.487451	-0.487451	-0.487451	-0.487451	-0.487451	-0.487451	-0.487451	-0.487451	-0.487451	-0.487451	-0.487451	-0.487451	-0.487451	-0.487451	-0.487451	0.0558347	-0.487451	-0.487451	-0.487451	-0.487451	-0.487451	-0.487451	-0.487451	-0.487451	-0.487451	-0.487451	-0.487451	-0.487451	-0.487451	-0.487451	-0.487451	-0.487451	2	-0.487451	-0.487451	-0.487451	-0.487451	-0.487451	-0.487451	-0.487451	-0.487451	-0.487451	-0.487451	-0.487451	-0.487451
CLU--chr8---	1.78551	0.43576	1.09589	0.560532	0.882011	1.31409	0.163077	0.98893	1.40945	0.499505	1.64839	-1.19327	1.39268	1.35543	-1.19327	0.872482	-1.19327	-1.19327	1.39667	0.848428	0.355771	0.990909	0.866926	0.838916	0.944115	0.953835	0.894638	0.209288	0.301013	1.4101	0.935645	1.09893	-1.19327	0.396842	1.73702	1.70802	2	-0.213245	0.766424	0.770771	1.00447	-1.19327	0.350423	1.28088	0.677568	-1.19327	1.46597	0.882777	0.156085
CNBP--chr3---	-0.55216	-0.55216	-0.55216	-0.55216	-0.55216	-0.55216	1.30849	-0.55216	-0.55216	-0.55216	1.14461	-0.55216	-0.55216	-0.55216	-0.55216	-0.55216	-0.55216	-0.55216	-0.55216	0.73563	-0.55216	-0.55216	-0.55216	0.663444	-0.55216	-0.55216	0.4663	0.596983	-0.55216	-0.55216	-0.55216	-0.55216	-0.55216	-0.55216	-0.55216	-0.12034	-0.55216	-0.55216	-0.55216	-0.55216	0.886887	-0.55216	0.0896401	-0.55216	0.940569	-0.55216	-0.55216	-0.55216	0.948605
COL18A1--chr21--+	0.698977	0.398127	-0.701969	2	-0.701969	1.59695	1.13865	0.177043	1.64702	1.83475	0.976532	-0.701969	-0.701969	0.55721	-0.701969	1.77074	-0.701969	2	0.38267	0.8825	0.151134	1.8342	-0.701969	0.798411	-0.701969	0.574652	0.305528	1.79504	-0.701969	2	1.26595	-0.701969	-0.701969	0.63427	1.74099	0.937067	2	0.322617	0.722628	0.727126	1.20939	-0.701969	0.854214	-0.701969	1.2745	-0.701969	1.96433	0.845063	0.78264
COL6A1--chr21--+	-0.339559	-0.339559	-0.339559	-0.339559	-0.339559	-0.339559	-0.339559	-0.339559	-0.339559	-0.339559	-0.339559	-0.339559	-0.339559	-0.339559	-0.339559	-0.339559	-0.339559	-0.339559	-0.339559	-0.339559	-0.339559	-0.339559	-0.339559	-0.339559	-0.339559	-0.339559	-0.339559	-0.339559	-0.339559	-0.339559	-0.339559	-0.339559	-0.339559	-0.339559	-0.339559	-0.339559	-0.339559	-0.339559	-0.339559	-0.339559	-0.339559	-0.339559	-0.339559	-0.339559	-0.339559	-0.339559	-0.339559	-0.339559	-0.339559
COLEC11--chr2--+	-0.43074	-0.43074	1.80465	-0.43074	-0.43074	-0.43074	-0.43074	-0.43074	-0.43074	-0.43074	-0.43074	-0.43074	-0.43074	-0.43074	-0.43074	-0.43074	-0.43074	-0.43074	-0.43074	-0.43074	-0.43074	-0.43074	-0.43074	-0.0562486	-0.43074	-0.43074	-0.43074	-0.43074	-0.43074	-0.43074	-0.43074	-0.43074	-0.43074	-0.43074	-0.43074	-0.43074	-0.43074	-0.43074	-0.43074	0.221177	-0.43074	-0.43074	-0.43074	-0.43074	-0.43074	-0.43074	1.6959	-0.43074	-0.43074
COMMD6--chr13---	-0.34741	-0.134344	-0.913631	0.708363	-0.913631	-0.913631	0.390231	0.166295	-0.913631	-0.913631	0.974272	-0.913631	-0.913631	-0.913631	-0.913631	-0.913631	-0.913631	-0.913631	-0.145293	-0.558102	0.138013	0.321653	0.832261	-0.58103	-0.913631	-0.00929631	-0.913631	-0.913631	-0.913631	-0.913631	0.127458	0.627385	-0.913631	0.0329357	-0.913631	-0.353457	1.21893	-0.187833	-0.913631	0.0987135	-0.337154	-0.913631	-0.463886	1.2699	-0.913631	-0.913631	-0.913631	0.182257	0.788103
COMT--chr22--+	0.290337	-0.583412	-0.583412	-0.583412	-0.583412	-0.583412	-0.583412	-0.583412	-0.583412	0.684523	-0.583412	-0.583412	-0.583412	0.79302	-0.583412	-0.583412	-0.583412	-0.583412	0.602228	0.420297	-0.583412	0.0343187	2	0.360325	-0.583412	-0.583412	-0.583412	-0.583412	-0.583412	-0.583412	1.02311	0.861376	-0.583412	0.877255	-0.583412	-0.116462	-0.583412	0.536583	0.973841	0.978759	-0.583412	-0.583412	-0.583412	-0.583412	0.343537	-0.583412	2	0.393508	1.03944
COPE--chr19---	0.0771068	-0.663772	-0.663772	-0.663772	0.0856776	-0.663772	0.345905	0.150975	-0.663772	0.41135	-0.663772	-0.663772	-0.663772	0.503349	-0.663772	-0.663772	-0.663772	-0.663772	0.341569	-0.663772	-0.663772	-0.663772	-0.663772	0.726915	-0.663772	0.519515	-0.663772	-0.663772	1.80204	-0.663772	0.118033	0.56131	-0.663772	0.574774	0.360924	-0.267831	2	0.285907	-0.663772	-0.663772	-0.663772	1.01523	-0.0752977	-0.663772	-0.663772	1.76969	-0.663772	0.164589	-0.663772
COX14--chr12--+	0.353335	-0.554208	2	2	-0.554208	-0.554208	0.682601	-0.554208	-0.554208	0.762768	-0.554208	-0.554208	-0.554208	-0.554208	-0.554208	-0.554208	-0.554208	-0.554208	-0.554208	0.488323	0.414403	0.608384	-0.554208	1.14932	0.633345	1.40944	2	-0.554208	-0.554208	-0.554208	-0.554208	1.91574	1.21268	1.93899	0.700999	-0.0691976	-0.554208	-0.554208	-0.554208	0.373808	0.369772	-0.554208	1.6176	-0.554208	-0.554208	-0.554208	-0.554208	1.20229	1.13141
COX17--chr3---	0.188412	-0.625174	-0.625174	1.1415	0.197824	-0.625174	1.2483	-0.625174	0.846597	-0.625174	1.08329	-0.625174	-0.625174	1.49875	-0.625174	-0.625174	-0.625174	-0.625174	-0.625174	0.987579	0.243157	2	-0.625174	0.253581	-0.625174	0.674236	0.400308	0.531891	2	2	0.233354	2	-0.625174	1.60991	-0.625174	0.787174	2	-0.625174	0.203827	0.206765	0.203147	-0.625174	0.53376	2	0.237949	-0.625174	-0.625174	0.284479	-0.625174
COX4I1--chr16--+	0.408615	-0.0508571	0.926849	1.15062	-0.367764	-0.131009	0.214698	-0.976514	-0.638916	0.0105957	1.09401	0.481541	-0.230415	0.403606	0.697302	1.5286	-1.49993	-1.49993	0.209329	0.587322	-0.317259	-0.660187	0.68412	0.341842	-0.442085	-0.0458527	-0.148208	-1.49993	-1.49993	0.453844	0.129026	2	-0.573282	0.485771	-0.389732	-0.388165	-1.49993	-0.460992	-0.118821	0.092856	-0.36179	-0.421287	0.709977	1.12296	-0.994989	-1.49993	1.31918	-0.967767	-0.615901
COX5B--chr2--+	0.444044	-0.323985	1.60213	0.446127	-0.512711	0.09245	1.08069	-0.467106	-0.100088	-1.03614	0.689129	1.11801	-1.03614	0.714361	-1.03614	-1.03614	-1.03614	1.35403	0.150942	0.328289	0.249602	0.605666	-1.03614	0.764326	0.773386	0.33077	-0.38393	-0.300242	1.49192	2	0.237805	2	-1.03614	1.82538	0.545327	0.547344	-1.03614	-1.03614	0.691078	0.205596	0.887573	0.136508	-0.625139	-1.03614	-0.080213	-1.03614	-1.03614	0.808873	-1.03614
COX6A1--chr12--+	0.721643	-0.989689	-0.989689	0.309386	-0.989689	0.730936	-0.17439	-0.331793	-0.989689	0.908922	1.005	-0.989689	-0.989689	0.572085	-0.989689	-0.989689	-0.989689	1.77374	0.8115	-0.302457	-0.989689	0.908504	0.854957	0.963098	0.33994	0.837971	-0.235628	0.439957	-0.989689	2	0.110287	1.4869	0.175036	1.50618	-0.162262	0.0488444	1.2635	-0.989689	-0.989689	0.750927	0.0757711	1.13683	0.44196	1.31735	0.489596	-0.989689	1.93855	-0.320799	-0.989689
COX6B1--chr19--+	1.5941	-0.925328	2	0.646984	0.0466013	-0.222397	-0.177312	-0.321725	-0.925328	-0.925328	2	-0.925328	-0.925328	0.931512	-0.925328	0.77264	-0.925328	-0.925328	-0.180524	0.351922	0.0941036	0.653657	0.767087	0.104958	0.680465	0.262278	-0.233497	0.386335	0.90146	2	0.953172	1.87693	-0.925328	1.65135	0.354945	-0.164953	-0.925328	-0.221761	0.0529192	0.0560082	-0.366509	1.02569	-0.143464	2	0.431878	-0.925328	0.905574	-0.311639	0.0941289
COX6C--chr8---	-0.0816442	0.638849	1.78452	1.55224	-0.494987	-0.3449	2	-0.445831	-1.05917	-1.05917	0.800431	-1.05917	-1.05917	-0.180564	-1.05917	1.50699	-1.05917	2	0.220339	0.238685	-0.463909	0.157595	2	0.340152	0.572529	1.02933	-0.356179	-1.05917	0.79709	1.23026	1.06535	1.2497	-1.05917	0.473032	-0.287781	0.523255	1.04143	-1.05917	-0.490871	0.563564	1.01433	-1.05917	0.492693	-1.05917	0.609422	-1.05917	-1.05917	0.379797	-0.0232671
COX7A2--chr6---	-1.01542	-1.01542	1.7595	1.70965	-0.464876	0.171627	0.945184	-1.01542	-1.01542	-0.22564	2	1.25031	-1.01542	1.44032	-1.01542	0.668215	-1.01542	-1.01542	1.43344	0.713055	-0.00459119	0.993449	1.48195	0.635013	0.576819	1.32873	0.530219	0.684759	0.795948	1.21864	1.41261	1.97459	-1.01542	0.912111	0.254048	0.528737	1.03437	-1.01542	1.19381	-0.458895	0.285999	0.919134	0.498914	1.08336	-0.00997857	0.772188	-1.01542	-0.406908	-0.00456608
COX7A2L--chr2---	-0.489785	0.687867	2	1.96136	1.0254	0.606044	-0.489785	1.14219	-0.489785	-0.489785	2	-0.489785	1.7925	-0.489785	-0.489785	-0.489785	-0.489785	2	-0.489785	0.047487	0.423461	-0.489785	2	0.0128384	1.41197	-0.489785	-0.489785	-0.489785	-0.489785	2	0.413151	2	-0.489785	0.940658	-0.489785	-0.489785	-0.489785	-0.489785	-0.489785	-0.489785	0.381381	-0.489785	0.189866	-0.489785	-0.489785	-0.489785	-0.489785	-0.489785	-0.489785
COX7B--chrX--+	0.606239	0.300307	1.87891	0.608528	-0.0134754	-1.02041	0.697465	-1.02041	-1.02041	-0.195221	2	-1.02041	0.496311	0.464083	-1.02041	-1.02041	-1.02041	2	-1.02041	1.16313	0.392557	0.615441	0.732956	-0.16492	-0.276314	0.481757	0.202686	-0.211692	1.7578	1.31381	-0.42035	2	-1.02041	0.541771	0.305972	0.145625	-1.02041	-1.02041	0.340266	0.882528	-0.441463	1.00088	0.561817	-1.02041	-0.417138	-1.02041	2	0.0801716	0.688609
COX7C--chr5--+	-0.380289	-0.568455	0.496398	1.24669	0.403585	-0.616261	0.788673	0.505319	-1.25651	-0.531036	0.849009	0.824738	-1.25651	-0.468957	-1.25651	0.290041	-1.25651	1.05277	0.53882	0.202405	0.662497	0.910113	1.53989	0.134252	0.491773	-0.805826	0.681733	-0.545516	-1.25651	-1.25651	0.647828	1.29586	-1.25651	1.31347	0.271434	0.041703	-1.25651	-0.165252	1.06451	-0.745299	-0.0610554	-0.123548	0.7323	-1.25651	-0.726137	-1.25651	-1.25651	-0.28892	-1.25651
COX8A--chr11--+	0.227974	-0.847234	1.30376	1.80215	-0.226672	-0.0615878	1.36273	-0.847234	-0.847234	-0.847234	2	-0.847234	-0.847234	0.754263	-0.847234	-0.847234	-0.847234	-0.847234	1.65503	0.130488	0.292156	-0.061365	1.04433	-0.18463	-0.0444925	-0.294203	-0.847234	-0.847234	-0.847234	-0.847234	-0.199881	1.69235	-0.847234	0.838076	0.00123868	0.00261559	-0.847234	-0.0608776	-0.847234	-0.21993	0.245326	-0.847234	0.859701	1.51849	0.286083	-0.847234	-0.847234	-0.161331	-0.847234
CP--chr3---	2	1.5662	-1.01236	1.06416	1.35118	1.21501	0.585295	1.46273	0.656189	0.395117	1.40462	-1.01236	-1.01236	0.988774	-1.01236	0.359599	-1.01236	1.03622	1.54597	2	0.842843	1.46479	1.02269	2	0.538557	1.52545	0.247148	0.855437	0.463685	1.55923	2	1.71441	0.374833	0.206005	1.17281	2	-1.01236	1.34665	1.36075	0.792047	1.68995	-1.01236	1.2129	-1.01236	1.74705	-1.01236	-1.01236	0.131867	0.980248
CPB2--chr13---	0.7063	-0.675001	2	0.32922	0.720547	1.04393	0.399041	1.74751	1.64104	-0.675001	1.95272	-0.675001	1.42708	1.38242	2	-0.675001	-0.675001	-0.675001	0.394429	-0.675001	0.166139	-0.675001	-0.675001	1.06615	-0.675001	0.0354689	0.318368	0.445831	1.948	-0.675001	1.67332	1.4699	-0.675001	0.6425	1.16328	1.56106	-0.675001	-0.675001	0.729619	0.734054	0.728592	1.11103	2	2	1.68281	-0.675001	-0.675001	0.850337	0.78879
CPS1--chr2--+	1.48623	0.0733555	-0.773491	0.0105463	0.690135	0.996202	2	2	-0.773491	1.54642	-0.773491	-0.773491	-0.773491	-0.773491	-0.773491	-0.773491	-0.773491	2	0.0614573	-0.0666613	0.755426	0.9966	1.12376	2	1.02665	1.71161	0.549972	1.14869	-0.773491	-0.773491	0.741398	1.38747	0.424449	1.79355	0.661735	0.0789129	1.54395	0.997471	1.51533	-0.144302	1.27919	1.41367	0.424449	2	1.79046	-0.773491	-0.773491	1.42047	0.369352
CREM--chr10--+	-0.443055	-0.443055	-0.443055	-0.443055	-0.443055	-0.443055	0.574478	-0.443055	-0.443055	-0.443055	-0.443055	-0.443055	-0.443055	-0.443055	-0.443055	-0.443055	-0.443055	-0.443055	-0.443055	-0.443055	-0.443055	-0.443055	-0.443055	-0.443055	-0.443055	-0.443055	0.49805	-0.443055	-0.443055	-0.443055	-0.443055	-0.443055	-0.443055	-0.443055	-0.443055	-0.443055	-0.443055	-0.443055	0.317735	-0.443055	-0.443055	-0.443055	-0.443055	-0.443055	-0.443055	-0.443055	-0.443055	-0.443055	0.943722
CRIP1--chr14--+	-0.475245	-0.475245	-0.475245	0.204123	-0.475245	-0.475245	-0.475245	0.111079	-0.475245	-0.475245	-0.475245	-0.475245	-0.475245	-0.475245	-0.475245	-0.475245	-0.475245	-0.475245	-0.475245	0.137223	-0.475245	-0.475245	-0.475245	-0.475245	-0.475245	-0.475245	-0.475245	-0.475245	-0.475245	-0.475245	-0.475245	-0.475245	-0.475245	-0.475245	-0.475245	-0.475245	-0.475245	-0.475245	-0.475245	-0.475245	-0.475245	-0.475245	-0.475245	-0.475245	-0.475245	-0.475245	-0.475245	-0.475245	-0.475245
CRP--chr1---	0.912523	-0.460946	-0.460946	2	0.92669	1.24824	-0.460946	2	0.956653	-0.460946	2	2	-0.460946	0.773537	-0.460946	1.96326	-0.460946	-0.460946	0.60242	0.439252	0.375424	0.921633	1.95534	2	-0.460946	-0.460946	0.52679	-0.460946	-0.460946	2	1.87406	2	-0.460946	-0.460946	-0.460946	0.624651	-0.460946	1.24959	0.337541	1.41959	-0.460946	-0.460946	0.655331	-0.460946	0.370408	-0.460946	-0.460946	-0.460946	2
CRYAB--chr11---	-0.368585	-0.368585	2	-0.368585	-0.368585	-0.368585	-0.368585	-0.368585	-0.368585	-0.368585	-0.368585	-0.368585	-0.368585	-0.368585	-0.368585	-0.368585	-0.368585	-0.368585	-0.368585	-0.368585	-0.368585	0.124097	1.78016	0.0407611	-0.368585	-0.368585	-0.368585	-0.368585	-0.368585	-0.368585	-0.368585	0.783731	-0.368585	-0.368585	-0.368585	-0.368585	-0.368585	-0.368585	-0.368585	-0.368585	-0.368585	-0.368585	-0.368585	-0.368585	-0.368585	-0.368585	-0.368585	-0.368585	-0.368585
CST3--chr20---	0.871478	-0.631832	-0.631832	1.19567	0.0135082	0.185184	0.837226	0.584918	-0.631832	0.29394	-0.631832	-0.631832	-0.631832	0.373159	-0.631832	1.34171	-0.631832	-0.631832	0.233853	0.101018	0.049056	0.185416	-0.631832	-0.631832	0.786057	-0.0567191	-0.631832	0.275462	-0.631832	1.98692	0.0413691	1.60868	-0.631832	0.434662	1.6912	-0.290893	1.77092	-0.631832	1.21934	0.508774	-0.631832	0.813934	-0.125105	-0.631832	-0.631832	-0.631832	-0.631832	-0.631832	-0.631832
CST7--chr20--+	-0.336021	-0.336021	-0.336021	-0.336021	-0.336021	-0.336021	-0.336021	-0.336021	-0.336021	-0.336021	-0.336021	-0.336021	-0.336021	-0.336021	-0.336021	-0.336021	-0.336021	-0.336021	-0.336021	-0.336021	-0.336021	-0.336021	-0.336021	-0.336021	-0.336021	-0.336021	-0.336021	-0.336021	-0.336021	-0.336021	-0.336021	-0.336021	-0.336021	-0.336021	-0.336021	-0.336021	-0.336021	-0.336021	-0.336021	-0.336021	-0.336021	-0.336021	-0.336021	-0.336021	-0.336021	-0.336021	-0.336021	-0.336021	-0.336021
CSTB--chr21---	-0.698477	0.289346	-0.698477	1.35756	-0.698477	-0.698477	0.279668	0.0908255	-0.698477	-0.698477	-0.698477	-0.698477	-0.698477	-0.698477	-0.698477	1.52187	-0.698477	2	-0.698477	0.724286	-0.698477	-0.698477	1.51461	0.0767559	-0.698477	0.447856	-0.698477	0.32228	1.69032	-0.698477	2	1.25491	-0.698477	0.501389	0.294218	0.0115988	2	0.221543	0.580729	1.02392	-0.698477	-0.698477	-0.128381	-0.698477	-0.698477	-0.698477	1.6957	-0.698477	0.634617
CTSB--chr8---	-0.500215	2	-0.500215	-0.500215	-0.500215	-0.500215	0.652427	-0.500215	-0.500215	0.727139	2	-0.500215	-0.500215	-0.500215	-0.500215	-0.500215	-0.500215	-0.500215	-0.500215	0.0308501	-0.500215	1.65557	-0.500215	-0.0033982	-0.500215	-0.500215	-0.500215	-0.500215	-0.500215	-0.500215	-0.500215	0.898332	-0.500215	-0.500215	-0.500215	-0.0482104	-0.500215	-0.500215	0.361594	-0.500215	-0.500215	-0.500215	0.171584	-0.500215	2	-0.500215	-0.500215	0.445438	-0.500215
CTSC--chr11---	-0.427271	-0.427271	-0.427271	-0.427271	-0.427271	-0.427271	-0.427271	-0.427271	-0.427271	-0.427271	-0.427271	-0.427271	-0.427271	1.02959	-0.427271	-0.427271	-0.427271	-0.427271	-0.427271	-0.427271	-0.427271	-0.427271	-0.427271	-0.427271	-0.427271	-0.427271	-0.427271	-0.427271	-0.427271	-0.427271	-0.427271	-0.427271	-0.427271	-0.427271	-0.427271	-0.427271	-0.427271	-0.427271	-0.427271	-0.427271	-0.427271	-0.427271	-0.427271	-0.427271	-0.427271	-0.427271	-0.427271	-0.427271	-0.427271
CTSD--chr11---	0.502856	0.898851	-0.71502	0.17039	-0.71502	-0.71502	-0.71502	-0.71502	0.541987	0.29333	0.744142	-0.71502	-0.71502	-0.71502	-0.71502	-0.71502	-0.71502	-0.71502	-0.71502	0.392436	-0.71502	-0.71502	1.42753	0.820128	-0.71502	0.394778	0.160821	0.273204	-0.71502	-0.71502	-0.71502	1.72534	-0.71502	0.446605	0.246036	-0.343669	-0.71502	-0.71502	-0.00698885	-0.71502	-0.0075694	-0.71502	-0.163094	-0.71502	0.568676	-0.71502	-0.71502	-0.71502	-0.71502
CTSL--chr9--+	0.418763	0.759438	-0.486577	0.667023	0.429237	-0.486577	0.74723	-0.486577	-0.486577	0.827202	-0.486577	-0.486577	-0.486577	0.939623	-0.486577	-0.486577	-0.486577	-0.486577	0.741932	0.553423	-0.486577	0.153489	-0.486577	0.0452236	0.698094	-0.486577	-0.486577	0.80098	-0.486577	-0.486577	-0.486577	-0.486577	-0.486577	-0.486577	-0.486577	0.409095	-0.486577	-0.486577	-0.486577	0.439186	0.435161	-0.486577	-0.486577	2	-0.486577	-0.486577	-0.486577	-0.486577	-0.486577
CUTA--chr6---	0.133892	-0.601485	2	1.50507	0.142399	-0.601485	-0.601485	0.801063	-0.601485	-0.601485	0.942747	-0.601485	-0.601485	2	-0.601485	-0.601485	-0.601485	-0.601485	-0.601485	-0.139744	0.183375	-0.601485	-0.601485	-0.169522	-0.601485	0.0614477	-0.601485	-0.601485	-0.601485	-0.601485	-0.601485	0.614499	-0.601485	0.627863	-0.601485	0.417252	-0.601485	0.341141	-0.601485	-0.601485	0.14721	2	-0.0173811	-0.601485	-0.601485	-0.601485	-0.601485	-0.601485	-0.601485
CWC15--chr11---	-0.508331	-0.508331	-0.508331	0.635626	0.399827	0.641418	2	-0.508331	1.11573	-0.508331	-0.508331	-0.508331	1.88625	0.905946	-0.508331	2	-0.508331	-0.508331	-0.508331	0.922511	0.449852	1.45027	-0.508331	0.0190242	0.666436	1.43418	0.623263	0.768462	-0.508331	-0.508331	0.439034	0.976182	-0.508331	-0.508331	-0.508331	-0.508331	-0.508331	-0.508331	-0.508331	-0.508331	0.405701	-0.508331	0.204763	-0.508331	0.444104	-0.508331	-0.508331	-0.508331	1.15914
CXCR4--chr2---	-0.628637	-0.628637	-0.628637	0.216885	-0.628637	0.221167	-0.628637	-0.628637	-0.628637	-0.628637	-0.628637	-0.628637	-0.628637	-0.628637	-0.628637	-0.628637	-0.628637	-0.628637	-0.628637	-0.628637	-0.628637	-0.159506	-0.628637	-0.628637	-0.628637	-0.628637	-0.628637	-0.628637	-0.628637	-0.628637	-0.628637	-0.628637	-0.628637	-0.628637	-0.628637	-0.628637	-0.628637	-0.628637	-0.628637	-0.628637	-0.628637	-0.628637	-0.628637	-0.628637	-0.628637	-0.628637	-0.628637	-0.628637	-0.628637
CYB5A--chr18---	0.969873	-0.410055	2	1.68318	0.984867	0.283994	0.702195	0.692656	-0.633205	-0.040271	1.15348	0.389651	-0.260287	0.899072	-1.41922	1.3455	-1.41922	0.587838	0.96932	1.28	0.966186	1.2141	2	1.15541	1.03686	0.751026	0.443957	0.758779	0.0269072	2	1.12407	2	-0.573288	0.393513	0.37632	1.18975	1.39099	0.285056	0.905796	0.602366	0.707699	0.518121	1.09756	0.975195	0.391328	-1.41922	2	1.20238	-0.612195
CYCS--chr7---	-0.521339	0.622471	-0.521339	0.537636	-0.521339	-0.521339	-0.521339	-0.521339	-0.521339	-0.521339	-0.521339	-0.521339	-0.521339	0.787876	-0.521339	-0.521339	2	-0.521339	-0.521339	0.433354	-0.521339	0.543301	-0.521339	0.728963	-0.521339	-0.521339	0.526192	-0.521339	-0.521339	-0.521339	0.355649	0.852893	-0.521339	1.7618	-0.521339	-0.0771925	-0.521339	-0.521339	-0.521339	-0.521339	-0.521339	1.36208	0.138781	-0.521339	-0.521339	-0.521339	-0.521339	0.407874	-0.521339
CYP2A6--chr19---	1.39019	1.23864	0.720531	0.920799	1.8309	0.927633	0.477529	1.52849	-1.03516	1.9628	1.0737	1.90178	0.300401	0.658781	-1.03516	-1.03516	-1.03516	-1.03516	1.71741	1.07494	1.3554	1.31718	0.508781	0.807885	0.429758	0.839864	0.0418453	0.825411	0.631365	2	0.197623	2	1.28971	1.05384	1.24589	0.87677	1.67152	-1.03516	1.28955	1.0021	1.28839	0.744701	1.28971	2	-0.11012	0.609505	-1.03516	1.88868	0.469731
CYP2A7--chr19---	0.485366	1.30047	2	0.76132	1.78161	1.67656	-0.241127	0.588809	-0.902164	1.72208	0.71511	-0.902164	0.391598	-0.902164	-0.902164	0.598363	-0.902164	-0.902164	0.839738	1.05391	0.959736	1.29089	1.3236	0.785599	1.83965	1.87347	0.475374	0.900177	-0.902164	2	-0.390315	2	1.34995	1.59134	0.864087	1.43246	-0.902164	-0.280408	1.58741	0.721041	-0.902164	0.197081	0.615025	0.968361	-0.902164	0.691028	-0.902164	0.607466	-0.902164
CYP2B6--chr19--+	0.131559	0.399934	-0.581648	0.327132	0.681268	1.87338	0.390317	0.202668	-0.581648	1.68179	-0.581648	-0.581648	-0.581648	-0.581648	-0.581648	-0.581648	-0.581648	-0.581648	1.56565	0.832126	0.17955	0.331993	-0.581648	0.757096	1.00348	-0.581648	0.952382	-0.581648	-0.581648	-0.581648	0.170956	-0.581648	0.806887	0.610638	0.404775	1.60091	-0.581648	0.33256	1.48787	0.147647	0.144476	-0.581648	2	-0.581648	2	-0.581648	-0.581648	1.25845	-0.581648
CYP2B7P--chr19--+	2	1.53179	-0.5071	2	1.58106	2	-0.5071	2	-0.5071	0.766804	2	-0.5071	-0.5071	0.875813	2	-0.5071	-0.5071	-0.5071	-0.5071	0.501335	1.12335	1.04172	-0.5071	0.813583	-0.5071	0.284282	-0.5071	1.59074	-0.5071	-0.5071	0.419255	0.94449	1.202	0.960444	-0.5071	1.01683	-0.5071	-0.5071	2	1.59955	-0.5071	-0.5071	0.190179	-0.5071	0.424213	-0.5071	2	2	-0.5071
CYP2C9--chr10--+	1.65413	0.764625	1.54462	-0.765778	1.1357	1.12937	0.751563	0.490962	1.17064	0.190421	-0.765778	-0.765778	-0.765778	0.272243	-0.765778	-0.765778	-0.765778	-0.765778	0.745885	1.48353	0.871521	2	1.26596	1.65957	0.698712	-0.171763	1.476	-0.765778	1.42728	-0.765778	0.445766	1.96201	-0.765778	1.98324	-0.765778	1.25067	1.71595	0.0788536	1.14624	0.412316	1.43242	-0.765778	1.6855	2	0.451527	-0.765778	2	1.58371	-0.765778
CYP2E1--chr10--+	-0.426165	-0.426165	-0.426165	2	0.883334	-0.426165	-0.426165	0.387081	2	0.646975	-0.426165	-0.426165	-0.426165	0.738804	-0.426165	1.86154	-0.426165	-0.426165	-0.426165	1.2947	0.36311	0.521176	1.85406	0.686382	-0.426165	0.240497	0.505952	-0.426165	2	-0.426165	2	1.58648	-0.426165	0.810098	-0.426165	-0.426165	-0.426165	2	-0.426165	-0.426165	-0.426165	-0.426165	0.161225	-0.426165	1.78627	-0.426165	2	-0.426165	2
CYP3A5--chr7---	-0.555689	1.22505	2	-0.555689	0.219891	0.426214	-0.555689	0.90662	-0.555689	0.556918	-0.555689	-0.555689	-0.555689	-0.555689	-0.555689	-0.555689	2	-0.555689	1.7527	1.22846	0.262613	-0.555689	-0.555689	0.272436	1.14835	-0.555689	0.410709	2	-0.555689	-0.555689	0.253375	0.712107	-0.555689	-0.555689	-0.555689	1.94994	-0.555689	0.427101	2	0.228317	1.6677	-0.555689	0.536473	2	2	-0.555689	-0.555689	0.301554	1.7486
CYTIP--chr2---	-0.420854	-0.420854	-0.420854	-0.420854	-0.420854	-0.420854	-0.420854	-0.420854	-0.420854	-0.420854	-0.420854	-0.420854	-0.420854	0.951534	-0.420854	-0.420854	-0.420854	-0.420854	-0.420854	-0.420854	0.508949	-0.420854	-0.420854	-0.420854	-0.420854	-0.420854	-0.420854	-0.420854	-0.420854	-0.420854	-0.420854	-0.420854	-0.420854	-0.420854	-0.420854	-0.420854	-0.420854	-0.420854	-0.420854	-0.420854	-0.420854	-0.420854	-0.420854	-0.420854	-0.420854	-0.420854	-0.420854	-0.420854	-0.420854
DAD1--chr14---	1.21528	-0.761502	1.6615	0.119038	-0.761502	0.123497	-0.761502	-0.00155811	-0.761502	-0.761502	2	-0.761502	-0.761502	1.57628	-0.761502	-0.761502	2	-0.761502	-0.761502	0.339863	-0.761502	0.45771	2	-0.35558	-0.761502	0.342192	-0.761502	-0.761502	1.53845	2	-0.0322843	-0.761502	0.583886	0.393734	0.850378	0.19582	-0.761502	-0.761502	-0.761502	-0.054869	0.469224	2	-0.212611	-0.761502	0.515135	-0.761502	-0.761502	0.0111404	-0.761502
DBI--chr2--+	0.522412	-0.281625	0.872206	1.98947	-0.479198	-1.02717	0.924282	0.0059965	-0.0472302	0.691991	0.778988	-1.02717	-1.02717	0.386991	-1.02717	1.46524	-1.02717	1.47506	1.18239	-0.163818	0.600846	0.972322	-1.02717	0.615558	1.35331	0.403827	0.511253	-0.256768	1.61942	1.19646	1.22229	2	-1.02717	2	-0.277948	1.21384	1.01306	-0.332798	-0.0617075	0.992717	0.779966	0.200458	0.988022	1.06182	0.833834	0.752094	-1.02717	1.11822	-0.0210365
DCDC2--chr6---	-0.37064	-0.37064	-0.37064	-0.37064	-0.37064	-0.37064	-0.37064	-0.37064	-0.37064	-0.37064	-0.37064	-0.37064	-0.37064	-0.37064	-0.37064	-0.37064	-0.37064	-0.37064	-0.37064	-0.37064	-0.37064	-0.37064	-0.37064	-0.37064	-0.37064	-0.37064	-0.37064	-0.37064	2	-0.37064	0.545409	-0.37064	-0.37064	-0.37064	-0.37064	-0.37064	-0.37064	-0.37064	-0.37064	-0.37064	0.513178	1.59667	-0.37064	-0.37064	-0.37064	-0.37064	-0.37064	-0.37064	-0.37064
DCN--chr12---	-0.729108	-0.729108	-0.729108	-0.729108	-0.729108	-0.729108	-0.729108	-0.729108	-0.729108	-0.729108	-0.729108	-0.729108	-0.729108	-0.729108	-0.729108	-0.729108	-0.729108	-0.729108	-0.729108	-0.45863	-0.729108	-0.729108	-0.729108	-0.476073	-0.165431	-0.729108	-0.729108	-0.729108	-0.729108	-0.729108	-0.729108	-0.729108	-0.729108	-0.729108	-0.729108	-0.729108	-0.729108	-0.176937	-0.290177	-0.288622	-0.729108	-0.729108	-0.729108	-0.729108	-0.729108	-0.729108	-0.729108	-0.247474	-0.729108
DCTN3--chr9---	0.421245	-0.477929	-0.477929	-0.477929	-0.477929	-0.477929	-0.477929	0.510896	-0.477929	-0.477929	-0.477929	-0.477929	-0.477929	0.938557	-0.477929	2	-0.477929	2	0.742212	0.0866598	-0.477929	0.157777	-0.477929	0.49327	-0.477929	0.958178	-0.477929	-0.477929	-0.477929	-0.477929	-0.477929	-0.477929	1.27266	-0.477929	-0.477929	-0.477929	-0.477929	-0.477929	-0.477929	-0.477929	-0.477929	2	-0.477929	2	-0.477929	-0.477929	-0.477929	-0.477929	-0.477929
DCXR--chr17---	1.12982	-0.214157	2	0.19164	0.972425	0.551238	0.258635	0.88195	1.00348	-0.17596	0.785024	1.20801	-0.91652	-0.91652	-0.91652	2	-0.91652	1.44078	0.619962	0.572735	1.21827	0.196827	2	1.39338	2	0.187677	1.45672	-0.190741	0.781967	2	0.830047	2	0.0770341	-0.0633906	0.273836	1.47656	1.84207	0.55229	-0.91652	-0.394679	1.30984	0.240003	0.0770341	1.05147	1.36778	-0.91652	0.785792	-0.345932	1.8852
DDIT4--chr10--+	-0.571393	-0.571393	-0.571393	-0.571393	-0.571393	-0.571393	-0.571393	-0.571393	-0.571393	-0.571393	-0.571393	-0.571393	-0.571393	-0.571393	-0.571393	1.5463	-0.571393	-0.571393	0.357523	-0.571393	-0.571393	-0.571393	-0.571393	-0.571393	-0.571393	-0.571393	-0.571393	-0.571393	-0.571393	-0.571393	0.15098	-0.571393	-0.571393	-0.571393	-0.571393	-0.205551	-0.571393	-0.571393	-0.571393	-0.571393	-0.571393	-0.571393	-0.571393	-0.571393	0.693261	-0.571393	-0.571393	-0.571393	-0.571393
DDT--chr22---	1.47198	1.09488	2	2	1.16212	0.245927	1.67158	0.0892399	0.183525	0.955561	0.851664	1.44686	0.305824	0.80638	-1.30602	1.97544	-1.30602	1.22124	1.25274	0.494397	0.867533	1.33007	1.20765	1.03995	1.35811	1.38723	0.391684	1.13771	0.0116727	1.41901	1.33363	2	-1.30602	1.83628	0.330054	0.818735	0.185118	-0.166512	0.422084	0.89744	1.17012	0.960038	1.23184	-1.30602	0.343729	-0.00561169	1.34323	1.08275	0.686181
DDX17--chr22---	-0.493191	-0.493191	-0.493191	-0.493191	-0.493191	-0.493191	-0.493191	-0.493191	-0.493191	-0.493191	-0.493191	-0.493191	-0.493191	-0.493191	-0.493191	-0.493191	-0.493191	-0.493191	-0.493191	-0.493191	1.05092	0.0945815	-0.493191	-0.00483823	-0.493191	0.256283	-0.493191	-0.493191	-0.493191	-0.493191	0.384109	-0.493191	-0.493191	-0.493191	-0.493191	-0.493191	-0.493191	-0.493191	-0.493191	-0.493191	0.353241	-0.493191	1.1254	-0.493191	-0.493191	-0.493191	-0.493191	-0.493191	1.05096
DDX18--chr2--+	0.48023	-0.449491	-0.449491	-0.449491	-0.449491	-0.449491	-0.449491	0.572927	-0.449491	-0.449491	-0.449491	-0.449491	-0.449491	-0.449491	-0.449491	-0.449491	-0.449491	-0.449491	-0.449491	-0.449491	1.27728	-0.449491	-0.449491	0.554702	-0.449491	0.388641	-0.449491	-0.449491	-0.449491	-0.449491	-0.449491	-0.449491	-0.449491	-0.449491	-0.449491	-0.449491	-0.449491	-0.449491	-0.449491	0.501203	-0.449491	-0.449491	0.28898	-0.449491	-0.449491	-0.449491	-0.449491	-0.449491	-0.449491
DDX21--chr10--+	-0.394072	-0.394072	-0.394072	0.774228	-0.394072	-0.394072	-0.394072	-0.394072	1.26455	-0.394072	-0.394072	-0.394072	-0.394072	-0.394072	-0.394072	-0.394072	-0.394072	-0.394072	-0.394072	-0.394072	-0.394072	-0.394072	-0.394072	-0.394072	-0.394072	-0.394072	-0.394072	-0.394072	-0.394072	-0.394072	-0.394072	-0.394072	-0.394072	-0.394072	-0.394072	-0.394072	-0.394072	-0.394072	-0.394072	-0.394072	-0.394072	-0.394072	-0.394072	-0.394072	-0.394072	-0.394072	-0.394072	-0.394072	-0.394072
DDX24--chr14---	0.0549539	0.314087	-0.633691	-0.633691	-0.633691	-0.633691	-0.633691	-0.633691	-0.633691	-0.633691	-0.633691	-0.633691	-0.633691	0.451144	-0.633691	-0.633691	-0.633691	-0.633691	-0.633691	-0.201293	-0.633691	-0.146827	-0.633691	0.402328	-0.633691	-0.633691	-0.633691	-0.633691	-0.633691	-0.633691	0.632493	-0.633691	-0.633691	-0.633691	0.318761	-0.265665	-0.633691	-0.633691	0.0680017	0.597534	-0.633691	0.926938	-0.633691	-0.633691	0.096884	-0.633691	-0.633691	-0.633691	-0.633691
DDX3X--chrX--+	-0.510639	-0.510639	-0.510639	0.523855	-0.510639	-0.510639	-0.510639	-0.510639	0.958021	-0.510639	-0.510639	-0.510639	-0.510639	0.768309	-0.510639	-0.510639	-0.510639	-0.510639	-0.510639	-0.510639	0.997241	-0.510639	-0.510639	-0.0337456	-0.510639	-0.510639	-0.510639	-0.510639	-0.510639	-0.510639	-0.510639	-0.510639	-0.510639	-0.510639	1.38306	0.292557	-0.510639	0.530033	-0.510639	-0.510639	-0.510639	-0.510639	-0.510639	-0.510639	-0.510639	-0.510639	-0.510639	-0.510639	-0.510639
DDX46--chr5--+	-0.575472	-0.575472	-0.575472	-0.575472	0.185418	-0.575472	-0.575472	-0.575472	-0.575472	-0.575472	-0.575472	-0.575472	-0.575472	-0.575472	-0.575472	-0.575472	-0.575472	-0.575472	1.15014	0.623343	-0.575472	-0.0436829	-0.575472	0.556144	1.09629	-0.575472	-0.575472	-0.575472	-0.575472	-0.575472	-0.575472	-0.575472	-0.575472	-0.575472	-0.575472	-0.173486	-0.575472	-0.575472	-0.575472	-0.575472	-0.575472	-0.575472	0.496004	-0.575472	-0.575472	-0.575472	-0.575472	0.880345	0.821603
DDX5--chr17---	-0.295083	-0.855428	-0.855428	-0.855428	-0.288601	-0.855428	-0.855428	-0.855428	0.79128	-0.855428	-0.855428	-0.855428	-0.855428	-0.855428	-0.855428	-0.855428	-0.855428	-0.855428	-0.855428	-0.503589	-0.257378	-0.855428	-0.855428	-0.250199	-0.122196	-0.350284	-0.149143	-0.855428	-0.855428	-0.855428	0.174856	0.0711317	-0.855428	0.0813152	-0.0804248	-0.855428	1.255	0.3677	-0.855428	-0.855428	0.142527	-0.855428	-0.41035	-0.855428	0.530132	-0.855428	-0.855428	-0.228918	-0.855428
DECR1--chr8--+	1.0335	1.00819	1.89283	0.895265	1.75409	0.229542	0.290929	0.0942997	-0.72755	1.08987	1.76423	2	-0.72755	1.80067	2	-0.72755	-0.72755	-0.72755	-0.72755	0.463533	-0.72755	0.229814	2	0.67526	1.88592	0.889462	0.879891	-0.72755	1.75975	2	0.0610706	1.30639	0.727434	1.32553	-0.72755	0.804899	2	0.230407	0.0339473	0.608611	1.05951	1.92891	-0.133945	-0.72755	1.12038	-0.72755	-0.72755	0.718878	0.660515
DEFB1--chr8---	-0.538005	-0.538005	-0.538005	1.07352	-0.538005	-0.538005	-0.538005	-0.538005	0.804518	-0.538005	-0.538005	-0.538005	-0.538005	-0.538005	-0.538005	1.75782	-0.538005	-0.538005	-0.538005	0.314519	-0.538005	-0.0133214	-0.538005	-0.10207	-0.538005	-0.538005	-0.538005	0.51745	1.932	2	1.28914	1.48178	-0.538005	-0.538005	-0.538005	-0.141391	-0.538005	-0.538005	-0.538005	0.220875	-0.538005	-0.538005	-0.538005	-0.538005	1.29707	-0.538005	1.93756	-0.538005	-0.538005
DHRS3--chr1---	0.0260465	-0.682454	2	0.22033	0.0342428	0.224901	0.283098	1.8144	0.599219	1.04053	-0.682454	2	1.2073	-0.682454	-0.682454	1.50931	-0.682454	-0.682454	0.278951	0.721992	0.0737212	1.12342	1.50214	-0.266278	0.244645	0.449121	0.210574	-0.682454	1.67559	2	0.0651843	0.489089	-0.682454	0.501965	0.297461	0.299051	1.98598	0.225721	0.0394706	-0.682454	0.579361	-0.682454	0.326789	-0.682454	2	-0.682454	-0.682454	0.109706	-0.682454
DNAJA1--chr9--+	-0.260944	-0.798137	-0.798137	-0.113637	0.153101	-0.798137	-0.798137	-0.207384	-0.798137	-0.798137	-0.798137	-0.798137	-0.798137	2	-0.798137	-0.798137	-0.798137	1.68326	-0.798137	-0.181042	-0.224797	-0.109975	-0.798137	0.0100329	-0.0952007	0.059835	0.727474	-0.0341521	-0.798137	-0.798137	-0.798137	0.0901392	-0.798137	-0.798137	1.15797	-0.51105	-0.798137	0.747993	-0.798137	-0.248826	-0.798137	0.419266	-0.798137	2	-0.228236	-0.798137	0.993786	-0.197513	-0.798137
DNAJB1--chr19---	-0.714205	-0.714205	-0.714205	-0.714205	-0.714205	-0.714205	-0.164434	-0.714205	-0.714205	-0.714205	-0.714205	-0.714205	-0.714205	1.43818	-0.714205	-0.714205	-0.714205	-0.714205	-0.714205	-0.250792	-0.714205	-0.714205	-0.714205	-0.714205	-0.714205	-0.714205	-0.714205	-0.714205	-0.714205	-0.714205	-0.714205	-0.714205	-0.714205	-0.714205	-0.714205	-0.498614	-0.714205	-0.714205	-0.714205	-0.714205	-0.714205	0.71974	-0.39378	-0.714205	-0.714205	-0.714205	-0.714205	-0.714205	-0.714205
DNAJB6--chr7--+	-0.39672	-0.39672	-0.39672	-0.39672	-0.39672	-0.39672	0.757114	-0.39672	-0.39672	-0.39672	-0.39672	-0.39672	-0.39672	0.937036	-0.39672	-0.39672	-0.39672	-0.39672	-0.39672	-0.39672	-0.39672	-0.39672	-0.39672	-0.39672	-0.39672	-0.39672	-0.39672	-0.39672	-0.39672	-0.39672	-0.39672	-0.39672	-0.39672	-0.39672	-0.39672	-0.39672	-0.39672	-0.39672	-0.39672	-0.39672	-0.39672	-0.39672	-0.39672	-0.39672	0.501489	-0.39672	-0.39672	-0.39672	-0.39672
DNAJC15--chr13--+	0.275505	-0.621267	-0.621267	0.521415	-0.621267	-0.621267	0.600863	-0.621267	1.00099	0.680078	1.26188	2	-0.621267	0.791435	-0.621267	-0.621267	-0.621267	-0.621267	0.595615	-0.621267	-0.621267	0.0127409	-0.621267	1.62869	1.37184	0.811003	0.509067	-0.621267	-0.621267	-0.621267	0.325043	2	-0.621267	-0.621267	0.619042	0.265928	-0.621267	0.52824	0.292496	0.295735	0.975853	-0.621267	-0.621267	-0.621267	1.03543	-0.621267	-0.621267	0.381395	-0.621267
DNASE1L3--chr3---	-0.419086	-0.419086	-0.419086	0.444589	-0.419086	-0.419086	-0.419086	-0.419086	-0.419086	-0.419086	1.00426	-0.419086	-0.419086	-0.419086	-0.419086	-0.419086	-0.419086	-0.419086	-0.419086	-0.419086	-0.419086	-0.419086	-0.419086	-0.419086	-0.419086	-0.419086	-0.419086	-0.419086	-0.419086	-0.419086	0.827173	-0.419086	-0.419086	-0.419086	-0.419086	-0.419086	-0.419086	-0.419086	-0.419086	-0.419086	-0.419086	-0.419086	-0.419086	-0.419086	-0.419086	-0.419086	-0.419086	-0.419086	-0.419086
DOK2--chr8---	-0.352405	-0.352405	-0.352405	-0.352405	-0.352405	-0.352405	-0.352405	-0.352405	-0.352405	-0.352405	-0.352405	-0.352405	-0.352405	-0.352405	-0.352405	-0.352405	-0.352405	-0.352405	-0.352405	-0.352405	-0.352405	-0.352405	-0.352405	-0.352405	-0.352405	-0.352405	-0.352405	-0.352405	-0.352405	-0.352405	-0.352405	-0.352405	-0.352405	-0.352405	-0.352405	-0.352405	-0.352405	-0.352405	-0.352405	-0.352405	-0.352405	-0.352405	-0.352405	-0.352405	-0.352405	-0.352405	-0.352405	-0.352405	-0.352405
DRAP1--chr11--+	-0.618163	-0.618163	-0.618163	0.312866	0.120957	-0.618163	-0.618163	-0.618163	-0.618163	-0.618163	-0.618163	-0.618163	-0.618163	0.532871	-0.618163	1.64217	-0.618163	-0.618163	-0.618163	-0.618163	-0.618163	-0.618163	1.63478	0.171032	-0.618163	-0.618163	-0.618163	-0.618163	1.81366	2	-0.618163	0.590034	-0.618163	-0.618163	0.39241	0.104701	-0.618163	-0.618163	-0.618163	0.128987	0.125738	-0.618163	-0.0377992	-0.618163	0.156993	-0.618163	-0.618163	-0.618163	-0.618163
DST--chr6---	-0.569896	0.629922	-0.569896	1.92738	-0.569896	0.546559	-0.569896	-0.569896	1.99202	2	1.26076	-0.569896	-0.569896	-0.569896	-0.569896	-0.569896	-0.569896	-0.569896	0.613065	-0.569896	1.04925	0.546875	-0.569896	0.371708	-0.569896	0.822449	-0.569896	-0.569896	-0.569896	-0.569896	0.350035	0.871628	-0.569896	-0.569896	-0.569896	1.46641	-0.569896	1.33302	1.51612	0.988745	-0.569896	-0.569896	0.122548	-0.569896	0.354959	-0.569896	-0.569896	0.404817	-0.569896
DSTN--chr20--+	0.157042	-0.596902	-0.596902	0.363786	-0.596902	-0.596902	1.13924	0.232213	-0.596902	-0.596902	-0.596902	2	-0.596902	-0.596902	-0.596902	-0.596902	-0.596902	-0.596902	1.13274	0.269183	0.207774	-0.596902	-0.596902	-0.596902	-0.596902	0.607251	-0.596902	-0.596902	-0.596902	-0.596902	-0.596902	0.649783	-0.596902	-0.596902	-0.596902	-0.193979	-0.596902	-0.596902	-0.596902	0.174049	-0.596902	2	-0.596902	-0.596902	-0.596902	-0.596902	-0.596902	-0.596902	-0.596902
DUSP1--chr5---	-0.0828781	0.167514	-0.748294	-0.748294	-0.748294	-0.748294	-0.748294	-0.0165336	0.455439	-0.748294	-0.748294	-0.748294	-0.748294	0.988825	-0.748294	-0.748294	-0.748294	-0.748294	-0.748294	-0.748294	-0.0381026	0.425702	-0.748294	-0.748294	0.122427	0.314469	0.0904276	0.198047	1.46636	-0.748294	-0.0461203	-0.748294	-0.748294	-0.748294	0.172031	0.173524	1.75787	0.104654	-0.0702704	-0.748294	-0.0708264	0.759693	-0.219759	-0.748294	-0.748294	-0.748294	-0.748294	-0.00430604	-0.748294
DUSP2--chr2---	-0.355976	-0.355976	-0.355976	-0.355976	-0.355976	-0.355976	-0.355976	-0.355976	-0.355976	-0.355976	-0.355976	-0.355976	-0.355976	-0.355976	-0.355976	-0.355976	-0.355976	-0.355976	-0.355976	-0.355976	-0.355976	-0.355976	-0.355976	-0.355976	-0.355976	-0.355976	-0.355976	-0.355976	-0.355976	-0.355976	-0.355976	-0.355976	-0.355976	-0.355976	-0.355976	-0.355976	-0.355976	-0.355976	-0.355976	-0.355976	-0.355976	-0.355976	-0.355976	-0.355976	-0.355976	-0.355976	-0.355976	-0.355976	-0.355976
DYNLL1--chr12--+	0.129718	-0.0829014	1.12033	1.34627	-0.860369	-0.860369	-0.860369	0.217035	-0.860369	-0.860369	0.325874	-0.860369	-0.860369	-0.860369	-0.860369	-0.860369	-0.860369	-0.860369	0.435581	0.0399499	0.188819	-0.460992	-0.860369	0.387648	-0.860369	0.361902	-0.860369	-0.0569807	1.01974	2	-0.264265	2	-0.860369	0.0839872	-0.0790672	-0.0777993	-0.860369	-0.860369	1.02525	0.149611	-0.860369	1.65837	0.239428	-0.860369	-0.261074	-0.860369	1.02397	-0.228767	-0.860369
DYNLRB1--chr20--+	0.196147	-0.596273	2	0.413442	0.205314	-0.596273	-0.596273	-0.596273	-0.596273	0.553642	-0.596273	-0.596273	-0.596273	0.652041	-0.596273	-0.596273	-0.596273	-0.596273	0.479007	0.974524	-0.596273	-0.596273	-0.596273	0.595868	2	-0.596273	-0.596273	-0.596273	2	-0.596273	0.23992	1.56036	-0.596273	-0.596273	-0.596273	0.187684	-0.596273	-0.596273	-0.596273	0.214022	0.210499	1.19953	0.03314	-0.596273	-0.596273	-0.596273	2	-0.596273	-0.596273
DYNLT1--chr6---	-0.523708	-0.523708	2	-0.523708	-0.523708	-0.523708	0.679068	-0.523708	1.07286	-0.523708	-0.523708	-0.523708	-0.523708	-0.523708	-0.523708	-0.523708	-0.523708	-0.523708	0.673903	-0.523708	0.41825	-0.523708	-0.523708	0.429557	-0.523708	0.885881	-0.523708	-0.523708	-0.523708	-0.523708	-0.523708	0.935668	-0.523708	-0.523708	-0.523708	-0.0520438	-0.523708	-0.523708	0.375585	0.378772	0.374847	-0.523708	-0.523708	-0.523708	0.4126	-0.523708	-0.523708	-0.523708	-0.523708
ECH1--chr19---	-0.00164396	0.955841	-0.725604	1.34825	1.36354	0.20155	0.261016	0.65517	-0.725604	-0.725604	-0.725604	2	-0.725604	-0.725604	2	-0.725604	-0.725604	-0.725604	0.256779	0.959065	0.619008	-0.213772	2	-0.300347	-0.725604	-0.0729631	0.186909	-0.725604	-0.725604	-0.725604	-0.725604	0.471502	0.683867	-0.725604	-0.725604	-0.725604	-0.725604	-0.725604	0.012073	0.0146874	0.563744	-0.725604	-0.150568	-0.725604	0.0424364	-0.725604	1.68932	0.083841	2
ECHDC2--chr1---	-0.61918	1.42881	2	2	0.272799	0.510087	0.582517	-0.61918	-0.61918	1.52519	-0.61918	-0.61918	-0.61918	-0.61918	-0.61918	-0.61918	-0.61918	-0.61918	1.40373	-0.0655138	-0.61918	0.510407	-0.61918	0.707396	1.3406	0.789144	1.27743	0.634868	-0.61918	2	1.55176	1.78065	-0.61918	0.854912	0.600392	0.253181	-0.61918	0.511108	0.952386	-0.61918	0.278569	-0.61918	0.08121	-0.61918	1.00982	-0.61918	-0.61918	1.08745	-0.61918
ECHS1--chr10---	0.831826	0.69578	1.81878	0.597425	1.05492	0.223753	1.49813	0.711813	0.02033	1.36551	0.179379	-0.968643	-0.968643	0.880823	-0.968643	2	-0.968643	1.55666	0.677339	0.626747	1.12988	1.04928	1.53998	1.50587	1.43379	1.23935	0.207245	-0.968643	2	1.27548	0.902396	1.82249	0.741361	0.533244	0.306546	1.29302	1.09039	-0.267871	1.06496	0.343296	0.33864	1.85012	0.552516	-0.968643	1.77262	-0.968643	0.854987	-0.357391	1.12992
ECI2--chr6---	0.791253	1.2487	2	1.12741	-0.615608	-0.615608	2	1.42783	1.74329	-0.615608	-0.615608	-0.615608	-0.615608	0.648888	-0.615608	1.86754	-0.615608	-0.615608	0.473611	0.663698	0.875232	0.412666	-0.615608	0.891107	1.1684	0.666403	1.1109	0.525964	-0.615608	2	1.36062	0.711685	-0.615608	1.58954	-0.615608	0.496382	2	-0.615608	-0.615608	-0.615608	1.30382	-0.615608	0.527808	-0.615608	1.3692	-0.615608	2	-0.615608	0.875269
EDF1--chr9---	-0.365819	0.280365	0.511359	0.711422	0.418494	0.479318	-0.560835	0.520286	0.227461	-0.51665	0.864168	-1.24253	0.091661	-1.24253	1.06664	0.304887	-1.24253	2	0.553805	0.46499	0.260785	0.603807	1.93331	0.274371	0.220885	0.911959	0.178055	0.864138	-1.24253	1.65794	0.98906	1.97369	-1.24253	0.84433	-0.0757717	0.392177	0.641421	0.480462	0.208939	-0.0421465	-0.35167	0.987781	0.747394	0.686446	-1.24253	-1.24253	0.426035	0.541038	0.260817
EEF1A1--chr6---	-0.129634	-1.32993	-2	0.627692	-1.30549	-0.842158	0.0589784	0.343457	-1.0615	-0.699231	-0.506988	-2	-2	-1.65546	-0.330656	-0.994072	-2	0.923696	-0.381546	-0.293574	-0.519384	0.345549	-0.342721	-0.578524	-0.818282	-1.01085	0.0694383	-0.158045	-2	-0.553487	-0.276043	-0.311445	-0.608688	0.353124	-1.01029	-0.607113	0.475815	-0.841162	0.0781636	-0.883891	0.382845	-0.399331	0.632762	-2	-0.0539583	-0.236255	-0.209416	0.202055	-0.149644
EEF1B2--chr2--+	0.122239	-0.748946	-1.37439	0.753382	-0.293422	-0.0673748	0.676103	-1.37439	-0.552311	-0.269253	0.140808	-1.37439	-0.162285	0.443062	-1.37439	-1.37439	-1.37439	-1.37439	-1.37439	-0.176095	-0.245201	0.908339	0.710889	-0.234225	-0.364381	-0.648585	-0.0837958	-0.728094	0.138086	0.491027	-0.020297	-0.137597	-1.37439	0.235081	-0.745862	-0.0850331	0.337169	-0.791876	-0.28699	0.474552	-0.565048	-0.344524	0.0470407	0.378075	-0.892279	-1.37439	-1.37439	-0.201922	-1.37439
EEF1D--chr8---	-0.0294823	-0.275189	-1.33591	0.63646	-0.0179939	-0.0223875	1.04472	0.0679144	-1.33591	-0.67317	0.587544	-1.33591	-1.33591	-0.143654	-1.33591	0.0769096	-1.33591	0.773684	-0.288178	-0.811278	0.0366438	0.236496	0.0722894	-0.190068	-1.33591	-0.347745	-0.353593	-1.33591	-1.33591	-1.33591	0.701573	0.268025	-1.33591	0.281575	-0.270639	-0.0401337	1.1328	-0.339015	-0.0106927	-0.239939	-0.243828	-0.300917	0.589626	-1.33591	-0.492197	-1.33591	-1.33591	0.29252	1.1714
EEF1G--chr11---	-0.495686	-0.671227	0.322176	0.70108	-0.84133	-0.295883	-0.239144	0.12048	-1.31311	-1.31311	0.651127	-1.31311	-1.31311	-0.0955749	0.839904	0.129666	-1.31311	-1.31311	0.361752	-0.0833153	-0.815342	-0.715655	-1.31311	0.574542	-1.31311	-0.0810792	-0.725256	1.18029	0.965497	-1.31311	-0.820962	0.617605	-1.31311	-0.0318569	-0.668061	-0.667014	-1.31311	-0.295078	-0.197126	-0.836204	-0.197873	-1.31311	0.653254	0.485424	-0.159882	-1.31311	-1.31311	-0.410448	-1.31311
EEF2--chr19---	-0.789958	0.092579	-0.789958	0.602474	-0.141299	0.0312602	0.686656	-0.789958	-0.789958	0.140575	1.34808	-0.789958	-0.789958	-0.789958	-0.789958	-0.789958	-0.789958	-0.789958	-0.789958	-0.789958	-0.105568	0.341386	-0.789958	-0.0973526	0.0491296	-0.211887	0.589283	-0.789958	-0.789958	-0.789958	0.389067	0.270368	-0.789958	-0.789958	-0.789958	0.0983706	-0.789958	-0.789958	0.352906	-0.134251	-0.137103	-0.789958	0.123476	-0.789958	-0.109673	-0.789958	-0.789958	-0.0729992	-0.789958
EGFL7--chr9--+	-0.344622	-0.344622	-0.344622	0.787887	-0.344622	-0.344622	-0.344622	-0.344622	-0.344622	-0.344622	-0.344622	-0.344622	-0.344622	-0.344622	-0.344622	-0.344622	-0.344622	-0.344622	0.861426	-0.344622	-0.344622	-0.344622	-0.344622	-0.344622	-0.344622	0.456609	-0.344622	-0.344622	-0.344622	-0.344622	-0.344622	-0.344622	-0.344622	-0.344622	-0.344622	-0.344622	-0.344622	-0.344622	-0.344622	-0.344622	-0.344622	-0.344622	-0.344622	-0.344622	-0.344622	-0.344622	-0.344622	-0.344622	-0.344622
EID1--chr15--+	-0.698997	-0.698997	-0.698997	0.174913	-0.698997	-0.698997	0.235673	0.0552244	1.31651	0.968876	-0.698997	-0.698997	-0.698997	1.09144	-0.698997	-0.698997	-0.698997	-0.698997	-0.698997	-0.26836	-0.698997	-0.214115	-0.698997	1.02174	-0.698997	-0.698997	-0.698997	-0.698997	-0.698997	-0.698997	0.0247296	0.435076	-0.698997	-0.698997	-0.698997	0.903003	-0.698997	-0.698997	-0.000161771	-0.698997	-0.698997	-0.698997	-0.154239	-0.698997	0.0286029	-0.698997	-0.698997	-0.698997	-0.698997
EIF1--chr17--+	-0.0180461	-0.666766	-1.94458	0.280224	-1.20137	-1.02915	0.368356	-0.465456	-1.94458	-1.33552	0.711878	-0.197292	-1.94458	0.683974	-0.00703185	-0.0134621	-1.94458	0.734576	-0.680924	-0.104013	-1.16505	0.644448	-0.0186557	-0.108411	0.717479	0.0625884	-0.752611	-1.34767	-0.547685	0.944232	-0.0721231	0.361266	-1.94458	0.21302	0.123416	0.125489	-0.363815	-1.02843	-0.940277	-0.236931	0.00303786	-0.073196	0.59658	0.368316	-0.502676	-1.94458	0.109776	0.419111	-0.683168
EIF3A--chr10---	0.349009	-0.578158	-0.578158	0.603254	-0.578158	0.609237	1.55687	-0.578158	1.09908	0.767295	-0.578158	-0.578158	-0.578158	-0.578158	-0.578158	-0.578158	-0.578158	-0.578158	1.54888	-0.578158	0.411398	0.0773391	-0.578158	0.423276	0.635074	0.902658	-0.578158	0.740441	-0.578158	-0.578158	1.70452	-0.578158	-0.578158	-0.578158	-0.578158	0.339107	-0.578158	-0.578158	-0.578158	0.369925	1.07309	-0.578158	0.158284	-0.578158	1.13469	-0.578158	-0.578158	0.458489	-0.578158
EIF3E--chr8---	-0.663235	-0.663235	-0.663235	0.261716	-0.663235	0.920011	-0.663235	0.135037	-0.663235	-0.663235	2	-0.663235	-0.663235	-0.663235	-0.663235	-0.663235	-0.663235	2	-0.663235	-0.663235	-0.663235	-0.150033	-0.663235	-0.663235	0.286629	-0.663235	-0.663235	0.369122	-0.663235	-0.663235	-0.663235	1.31235	-0.663235	-0.663235	-0.663235	-0.2753	-0.663235	0.267241	-0.663235	-0.663235	0.0758099	-0.663235	-0.08666	-0.663235	0.106861	1.72102	-0.663235	-0.663235	-0.663235
EIF3G--chr19---	0.0290312	-0.673267	-0.673267	-0.673267	0.0371557	-0.673267	0.283832	-0.673267	-0.673267	-0.673267	0.801503	-0.673267	-0.673267	-0.673267	-0.673267	-0.673267	-0.673267	2	-0.673267	0.446035	0.0762885	-0.17675	1.49221	-0.260734	-0.673267	-0.673267	0.211943	0.325528	-0.673267	-0.673267	0.0678264	-0.673267	-0.673267	-0.673267	0.298069	-0.297944	-0.673267	-0.673267	-0.673267	-0.673267	0.041751	-0.673267	-0.673267	-0.673267	1.0633	-0.673267	-0.673267	-0.673267	-0.673267
EIF3H--chr8---	-0.60662	-0.60662	-0.60662	-0.60662	-0.60662	-0.60662	-0.60662	-0.60662	-0.60662	-0.60662	-0.60662	-0.60662	-0.60662	-0.60662	-0.60662	-0.60662	-0.60662	-0.60662	-0.60662	-0.0770261	-0.60662	-0.60662	-0.60662	0.304381	-0.60662	0.153731	0.456492	-0.60662	-0.60662	-0.60662	0.283412	-0.60662	-0.60662	-0.60662	-0.60662	0.227813	-0.60662	-0.60662	-0.60662	0.255847	0.252096	-0.60662	0.0633182	-0.60662	0.288175	-0.60662	-0.60662	0.336413	-0.60662
EIF3K--chr19--+	-0.912723	0.42041	-0.912723	1.05577	-0.912723	-0.912723	0.409031	-0.281503	0.125623	-0.912723	-0.912723	-0.912723	-0.912723	-0.912723	-0.912723	-0.912723	-0.912723	-0.912723	-0.912723	0.0020869	0.153352	-0.506918	2	-0.0491922	-0.161634	-0.912723	-0.189237	-0.912723	0.997648	-0.912723	-0.912723	0.0364016	-0.912723	0.664144	-0.118846	0.0837006	1.24911	-0.176965	-0.912723	-0.912723	-0.328336	0.388075	0.204776	-0.912723	-0.912723	-0.912723	1.00195	-0.270955	-0.912723
EIF4A1--chr17--+	-0.277939	-0.849543	1.15467	-0.849543	-0.849543	-0.849543	-0.0705549	-0.849543	-0.849543	-0.849543	-0.849543	-0.849543	-0.849543	0.642673	-0.849543	-0.849543	-0.849543	-0.849543	-0.849543	-0.490634	-0.849543	-0.849543	0.912946	-0.51378	-0.849543	0.0633889	-0.129066	-0.849543	-0.849543	1.49682	-0.849543	1.15793	-0.849543	0.106022	-0.849543	-0.544066	1.3033	-0.849543	-0.267108	-0.265044	-0.267586	-0.849543	-0.395522	-0.849543	-0.243135	1.02793	-0.849543	0.256764	-0.849543
EIF4A2--chr3--+	0.128845	-0.637555	-0.637555	0.339005	0.137711	-0.637555	-0.637555	-0.637555	-0.637555	0.474602	-0.637555	-0.637555	-0.637555	-0.637555	-0.637555	-0.637555	-0.637555	-0.637555	-0.637555	-0.637555	-0.637555	-0.0957183	1.72557	-0.637555	-0.637555	-0.637555	-0.637555	-0.637555	-0.637555	-0.637555	0.171182	0.629728	-0.637555	-0.637555	-0.637555	-0.227974	-0.637555	0.344838	-0.637555	-0.637555	-0.637555	1.09929	-0.637555	-0.637555	-0.637555	-0.637555	-0.637555	0.219342	-0.637555
EIF4B--chr12--+	1.59956	0.706976	-0.546373	0.614018	-0.546373	0.619894	-0.546373	1.1905	-0.546373	0.775139	-0.546373	-0.546373	-0.546373	-0.546373	-0.546373	2	2	-0.546373	-0.546373	0.499749	-0.546373	-0.546373	-0.546373	0.437242	-0.546373	-0.546373	-0.546373	0.748763	-0.546373	-0.546373	0.414602	0.959466	1.2266	0.976016	-0.546373	0.715201	-0.546373	0.620948	0.381551	-0.546373	-0.546373	-0.546373	0.176965	-0.546373	-0.546373	-0.546373	-0.546373	2	-0.546373
EIF4G2--chr11---	-0.562567	-0.562567	-0.562567	-0.562567	-0.562567	0.52015	-0.562567	-0.562567	-0.562567	1.49341	-0.562567	-0.562567	-0.562567	0.769255	-0.562567	-0.562567	-0.562567	-0.562567	-0.562567	-0.562567	-0.562567	-0.562567	-0.562567	-0.562567	0.543709	-0.562567	-0.562567	-0.562567	-0.562567	-0.562567	0.991892	-0.562567	-0.562567	-0.562567	-0.562567	-0.110751	-0.562567	-0.562567	-0.562567	-0.562567	-0.562567	-0.562567	0.108952	-0.562567	0.33434	-0.562567	-0.562567	0.382691	-0.562567
EIF5--chr14--+	0.631549	0.339025	-0.730621	0.957025	0.645599	0.264706	0.328545	-0.730621	1.55335	0.397198	1.86071	-0.730621	-0.730621	-0.730621	-0.730621	-0.730621	-0.730621	-0.730621	1.05236	-0.242624	0.0988687	0.640583	-0.730621	-0.274095	1.54313	1.32246	0.248989	-0.730621	-0.730621	-0.730621	-0.730621	1.38457	-0.730621	-0.730621	1.0822	0.0382716	2	-0.730621	0.0612973	-0.730621	0.653532	-0.730621	0.376472	-0.730621	0.0938934	-0.730621	-0.730621	-0.730621	-0.730621
EIF5B--chr2--+	0.395047	-0.493497	-0.493497	0.638702	1.0799	-0.493497	-0.493497	-0.493497	-0.493497	0.795909	1.37237	-0.493497	-0.493497	-0.493497	-0.493497	-0.493497	-0.493497	-0.493497	0.71222	0.527209	0.454837	-0.493497	-0.493497	0.843257	1.48132	-0.493497	0.626466	0.770173	-0.493497	-0.493497	-0.493497	-0.493497	-0.493497	-0.493497	1.57906	-0.0186403	-0.493497	-0.493497	-0.493497	-0.493497	0.41114	1.52015	0.212267	-0.493497	-0.493497	-0.493497	-0.493497	-0.493497	-0.493497
ELF1--chr13---	-0.432114	-0.432114	-0.432114	-0.432114	-0.432114	-0.432114	-0.432114	-0.432114	-0.432114	-0.432114	-0.432114	-0.432114	-0.432114	-0.432114	-0.432114	2	-0.432114	-0.432114	-0.432114	-0.432114	0.516043	-0.432114	-0.432114	0.904391	-0.432114	-0.432114	-0.432114	-0.432114	-0.432114	-0.432114	-0.432114	-0.432114	-0.432114	-0.432114	-0.432114	-0.432114	-0.432114	-0.432114	-0.432114	-0.432114	-0.432114	-0.432114	-0.432114	-0.432114	0.510356	-0.432114	-0.432114	-0.432114	-0.432114
EML4--chr2--+	-0.497934	0.669323	-0.497934	0.58275	-0.497934	-0.497934	0.657887	-0.497934	-0.497934	-0.497934	-0.497934	-0.497934	-0.497934	-0.497934	-0.497934	-0.497934	-0.497934	-0.497934	-0.497934	-0.497934	-0.497934	-0.497934	-0.497934	0.000252511	-0.497934	0.856625	-0.497934	-0.497934	-0.497934	-0.497934	0.397032	-0.497934	-0.497934	-0.497934	-0.497934	-0.497934	-0.497934	-0.497934	-0.497934	-0.497934	0.365542	-0.497934	-0.497934	-0.497934	0.401822	-0.497934	2	0.450327	-0.497934
EMP3--chr19--+	-0.410267	-0.410267	-0.410267	-0.410267	-0.410267	-0.410267	-0.410267	-0.410267	-0.410267	-0.410267	-0.410267	-0.410267	-0.410267	-0.410267	-0.410267	-0.410267	-0.410267	-0.410267	-0.410267	-0.410267	-0.410267	-0.410267	-0.410267	-0.410267	-0.410267	-0.410267	-0.410267	-0.410267	-0.410267	-0.410267	-0.410267	-0.410267	-0.410267	-0.410267	-0.410267	-0.410267	-0.410267	-0.410267	-0.410267	-0.410267	-0.410267	-0.410267	-0.410267	-0.410267	-0.410267	-0.410267	-0.410267	-0.410267	-0.410267
ENG--chr9---	0.391011	-0.37713	-0.37713	-0.37713	-0.37713	-0.37713	-0.37713	-0.37713	-0.37713	-0.37713	-0.37713	-0.37713	-0.37713	0.832937	-0.37713	-0.37713	-0.37713	-0.37713	-0.37713	0.105184	-0.37713	-0.37713	-0.37713	-0.37713	-0.37713	0.31534	-0.37713	-0.37713	-0.37713	-0.37713	-0.37713	-0.37713	-0.37713	-0.37713	-0.37713	-0.37713	-0.37713	-0.37713	0.405565	-0.37713	-0.37713	-0.37713	-0.37713	-0.37713	-0.37713	-0.37713	-0.37713	-0.37713	-0.37713
ENO1--chr1---	0.68553	0.397205	-0.657092	-0.657092	-0.657092	0.323952	1.1069	0.185325	0.728669	0.454542	-0.657092	-0.657092	-0.657092	1.34271	-0.657092	-0.657092	-0.657092	-0.657092	0.382392	-0.176097	0.160494	-0.11551	1.70492	0.495363	-0.657092	1.00039	-0.657092	1.73596	-0.657092	-0.657092	-0.657092	0.609595	-0.657092	0.623516	-0.657092	0.404123	-0.657092	-0.657092	-0.657092	0.712507	-0.657092	-0.657092	-0.657092	-0.657092	1.23709	-0.657092	-0.657092	-0.657092	-0.657092
ENSA--chr1---	-0.419328	-0.419328	2	0.738469	-0.419328	-0.419328	0.818967	-0.419328	-0.419328	1.79035	-0.419328	-0.419328	-0.419328	1.01206	-0.419328	-0.419328	-0.419328	-0.419328	-0.419328	-0.419328	-0.419328	-0.419328	-0.419328	-0.419328	-0.419328	-0.419328	-0.419328	-0.419328	-0.419328	-0.419328	-0.419328	-0.419328	-0.419328	-0.419328	-0.419328	0.0662652	-0.419328	-0.419328	-0.419328	-0.419328	-0.419328	-0.419328	0.302393	-0.419328	-0.419328	-0.419328	-0.419328	-0.419328	-0.419328
ENY2--chr8--+	1.01952	-0.70521	-0.70521	1.80491	0.035182	-0.70521	1.9315	0.690754	0.618836	-0.70521	-0.70521	-0.70521	-0.70521	1.77087	-0.70521	-0.70521	-0.70521	2	0.287981	0.461309	1.11347	1.40035	-0.70521	-0.70521	0.25254	-0.0453889	-0.70521	-0.70521	-0.70521	-0.70521	0.0671465	1.28678	-0.70521	1.88702	0.307102	0.565379	-0.70521	-0.70521	0.0405826	1.05123	-0.70521	-0.70521	0.719767	-0.70521	-0.70521	-0.70521	-0.70521	-0.70521	-0.70521
EPHX1--chr1--+	-0.63804	-0.63804	2	2	1.52468	0.99659	0.383327	-0.63804	1.56442	0.449529	0.935758	2	1.36095	-0.63804	-0.63804	-0.63804	-0.63804	2	0.378941	0.22289	1.22421	0.996995	1.67284	1.24231	-0.63804	0.983558	1.49039	-0.63804	-0.63804	2	0.739956	2	-0.63804	0.614846	0.39852	1.11256	2	1.51902	-0.63804	1.54252	-0.63804	-0.63804	1.15546	-0.63804	0.746508	-0.63804	-0.63804	-0.63804	-0.63804
ERH--chr14---	0.410195	-0.526573	2	-0.526573	-0.526573	-0.526573	0.750064	-0.526573	-0.526573	-0.526573	-0.526573	-0.526573	-0.526573	0.949136	-0.526573	-0.526573	-0.526573	-0.526573	-0.526573	0.54953	-0.526573	0.135712	2	0.485231	0.699222	-0.526573	-0.526573	-0.526573	-0.526573	-0.526573	0.461943	2	-0.526573	1.03945	0.769054	-0.526573	-0.526573	-0.526573	-0.526573	-0.526573	1.14178	1.59636	-0.526573	-0.526573	-0.526573	-0.526573	-0.526573	-0.526573	-0.526573
ERP29--chr12--+	0.889979	1.38202	-0.795118	1.65732	-0.795118	-0.795118	0.851585	-0.00871406	-0.795118	0.242603	1.5892	-0.795118	-0.795118	1.62406	-0.795118	-0.795118	-0.795118	-0.795118	-0.795118	0.344595	0.533048	-0.289546	-0.795118	0.280709	-0.795118	-0.150459	0.742996	0.221891	-0.795118	-0.795118	-0.0405101	0.387346	-0.795118	1.16942	0.193931	0.671238	-0.795118	-0.795118	0.479391	-0.0638811	-0.067061	-0.795118	0.223533	1.96256	1.34429	-0.795118	-0.795118	0.00442662	-0.795118
ETFB--chr19---	1.23475	1.21027	1.48812	0.0296768	0.602242	0.380755	-0.373225	1.36942	0.411963	0.15942	-0.00596899	-1.05223	0.276698	0.633298	-1.05223	2	-1.05223	1.24923	0.447851	1.4997	0.860278	0.786824	1.7347	0.964342	0.690132	0.651335	0.0194273	0.504229	0.606018	1.8368	-0.526468	2	-0.0822136	0.316529	0.76203	1.57034	2	-0.413574	-0.164235	-1.05223	0.609903	0.0768942	0.140088	2	1.02389	-1.05223	0.609753	0.724302	-0.126828
EZR--chr6---	-0.466152	0.654162	-0.466152	0.57107	-0.466152	-0.466152	-0.466152	-0.466152	-0.466152	-0.466152	-0.466152	-0.466152	-0.466152	-0.466152	-0.466152	-0.466152	-0.466152	-0.466152	0.638421	0.0449609	-0.466152	-0.466152	-0.466152	-0.466152	-0.466152	-0.466152	0.559861	0.691513	-0.466152	-0.466152	-0.466152	-0.466152	-0.466152	0.894644	-0.466152	-0.466152	-0.466152	-0.466152	-0.466152	0.366218	-0.466152	-0.466152	-0.466152	-0.466152	-0.466152	-0.466152	-0.466152	-0.466152	1.04574
F10--chr13--+	1.05845	-0.548726	-0.548726	-0.548726	-0.548726	0.625624	-0.548726	1.20019	1.11009	-0.548726	1.37686	2	-0.548726	-0.548726	-0.548726	2	-0.548726	-0.548726	-0.548726	2	1.72978	1.06911	-0.548726	1.75193	-0.548726	0.277921	0.60708	0.755387	2	-0.548726	1.13729	2	-0.548726	-0.548726	1.59016	1.04311	-0.548726	-0.548726	0.385629	1.09074	1.08439	1.52937	0.179625	-0.548726	1.14531	-0.548726	2	1.22604	-0.548726
F12--chr5---	-0.621561	2	2	-0.621561	0.211166	1.74606	1.27406	-0.621561	-0.621561	0.573026	-0.621561	2	1.57413	-0.621561	-0.621561	-0.621561	-0.621561	2	1.85691	1.78073	-0.621561	1.17436	-0.621561	0.616892	-0.621561	0.69321	0.416043	0.549182	2	-0.621561	1.40516	0.739648	-0.621561	-0.621561	-0.621561	0.192851	2	1.17534	0.845608	0.220212	1.34691	1.24401	-0.621561	2	0.251765	-0.621561	-0.621561	0.298846	0.907413
F2--chr11--+	1.75574	0.689449	0.931618	0.595103	2	0.601139	0.300462	0.940976	-0.90712	0.368177	-0.90712	2	-0.90712	-0.0810062	-0.90712	-0.90712	2	2	2	1.70868	0.395932	0.42953	1.49923	1.46652	0.258401	0.478193	0.22083	1.04146	1.65498	-0.90712	1.5795	1.97393	-0.90712	-0.0304496	1.00244	1.00469	1.06797	0.899226	1.38184	1.78989	0.842323	0.956932	1.04374	2	1.27806	-0.90712	0.842165	0.724998	1.44905
FABP1--chr2---	1.54865	0.46141	2	2	0.603656	0.676233	1.21699	0.52276	0.115877	-0.127393	1.66185	1.49212	0.304346	1.05133	-0.532614	1.18213	0.449336	1.93114	1.46447	2	1.36205	1.04161	1.66471	1.23328	0.811693	2	0.476173	0.0216017	1.37715	2	0.805614	2	-0.992932	1.80111	1.32884	1.82425	1.67525	0.125293	0.395366	0.723711	0.833435	0.0429825	0.879689	1.16884	0.977192	-0.202234	1.05054	0.737619	0.284671
FABP4--chr8---	-0.680764	-0.680764	-0.680764	-0.680764	-0.680764	-0.138234	-0.103437	-0.680764	0.0855799	-0.680764	-0.680764	-0.680764	0.449164	-0.680764	1.27487	-0.680764	-0.680764	-0.680764	-0.680764	-0.680764	-0.680764	-0.13808	-0.680764	0.114423	0.260769	-0.680764	-0.680764	-0.680764	-0.680764	1.05818	-0.680764	-0.680764	-0.680764	-0.680764	-0.0948487	-0.261658	-0.680764	-0.680764	-0.680764	-0.680764	-0.680764	-0.680764	-0.344278	-0.680764	-0.680764	-0.680764	-0.680764	-0.680764	-0.680764
FABP5--chr8--+	-0.333158	-0.333158	-0.333158	-0.333158	-0.333158	-0.333158	0.732598	-0.333158	-0.333158	-0.333158	-0.333158	-0.333158	-0.333158	-0.333158	-0.333158	-0.333158	-0.333158	-0.333158	-0.333158	-0.333158	-0.333158	-0.333158	-0.333158	-0.333158	-0.333158	-0.333158	-0.333158	-0.333158	-0.333158	-0.333158	-0.333158	-0.333158	-0.333158	-0.333158	-0.333158	-0.333158	-0.333158	0.669267	-0.333158	-0.333158	-0.333158	-0.333158	-0.333158	-0.333158	-0.333158	-0.333158	-0.333158	-0.333158	-0.333158
FAM162A--chr3--+	0.94078	0.607118	2	-0.612959	0.956806	-0.612959	0.595164	-0.612959	-0.612959	-0.612959	1.24861	-0.612959	-0.612959	-0.612959	-0.612959	-0.612959	-0.612959	-0.612959	1.42077	0.405391	1.03353	1.64659	2	-0.612959	-0.612959	0.802896	1.90466	0.647795	2	-0.612959	-0.612959	2	-0.612959	0.869015	0.613135	1.20484	-0.612959	-0.612959	0.96701	0.293532	0.289591	1.39604	-0.612959	-0.612959	1.02475	-0.612959	-0.612959	1.67422	-0.612959
FAM177A1--chr14--+	2	-0.460104	-0.460104	-0.460104	-0.460104	0.743843	0.821063	0.573719	-0.460104	-0.460104	-0.460104	-0.460104	-0.460104	1.02084	-0.460104	-0.460104	-0.460104	-0.460104	1.69659	-0.460104	-0.460104	0.744185	-0.460104	-0.460104	-0.460104	1.57397	1.56193	-0.460104	-0.460104	-0.460104	1.26841	2	-0.460104	-0.460104	-0.460104	-0.460104	-0.460104	0.744932	-0.460104	-0.460104	-0.460104	-0.460104	1.7896	-0.460104	-0.460104	-0.460104	-0.460104	0.590994	-0.460104
FAM96B--chr16---	-0.689086	-0.689086	-0.689086	0.871274	0.0378023	0.231172	0.290196	0.101134	-0.689086	-0.689086	-0.689086	-0.689086	-0.689086	-0.689086	-0.689086	-0.689086	-0.689086	-0.689086	-0.689086	-0.689086	0.0778422	-0.181061	1.52658	-0.689086	0.251196	0.45858	-0.689086	-0.689086	-0.689086	-0.689086	0.0691839	1.26657	-0.689086	-0.689086	0.304763	0.784387	-0.689086	-0.689086	1.03035	0.0456994	0.0425041	0.939373	0.709902	2	-0.689086	-0.689086	1.70788	-0.689086	-0.689086
FAU--chr11---	-0.172	-1.34554	0.0136878	0.576702	-0.261516	-1.8481	0.263373	-0.0733036	-0.775013	-1.31821	-0.630604	-0.327946	-1.8481	-0.894842	-1.8481	-0.168012	-1.8481	0.88898	-0.0700354	-0.0266877	-1.1699	0.647382	0.875901	-0.0922805	-0.395348	0.116452	-0.0316837	-0.707392	-1.8481	1.18831	0.144058	0.972873	-1.8481	0.513644	-0.996372	-0.182907	0.801008	-1.38004	-0.489807	-0.626139	-0.789194	0.241886	0.105945	0.164139	-0.593633	-1.8481	0.595301	-0.401933	-1.16989
FBP1--chr9---	1.58349	1.18481	-0.747978	0.630563	1.36011	0.0650476	-0.747978	1.20342	1.64049	0.795879	1.92574	-0.747978	-0.747978	0.252104	-0.747978	-0.747978	-0.747978	-0.747978	1.53184	-0.0187075	0.431119	0.37208	-0.747978	1.46099	1.10932	0.265957	1.97427	-0.747978	-0.747978	-0.747978	1.42474	2	-0.747978	0.313307	0.130064	1.56644	2	1.07921	0.383484	0.77549	0.770084	-0.747978	0.156343	-0.747978	1.89737	-0.747978	1.36968	-0.747978	1.68894
FCER1G--chr1--+	-0.369367	-0.369367	-0.369367	-0.369367	-0.369367	-0.369367	0.56697	-0.369367	-0.369367	-0.369367	-0.369367	-0.369367	-0.369367	-0.369367	-0.369367	-0.369367	-0.369367	-0.369367	-0.369367	-0.369367	-0.369367	-0.369367	-0.369367	-0.369367	-0.369367	-0.369367	-0.369367	-0.369367	-0.369367	-0.369367	-0.369367	-0.369367	-0.369367	0.779214	-0.369367	-0.369367	-0.369367	-0.369367	-0.369367	-0.369367	-0.369367	-0.369367	-0.369367	-0.369367	-0.369367	-0.369367	-0.369367	-0.369367	-0.369367
FCGRT--chr19--+	0.889251	-0.00545487	-0.835072	0.473865	-0.225308	-0.0630968	-0.0135832	-0.835072	-0.835072	-0.835072	0.430739	-0.835072	0.772722	0.114515	-0.835072	1.9384	-0.835072	-0.835072	-0.017111	-0.456582	0.284491	-0.0628779	1.02358	-0.183998	0.928447	-0.291664	-0.835072	0.605427	1.17115	1.63931	1.22794	1.97422	-0.835072	-0.835072	-0.00136352	-1.05639e-05	-0.835072	0.899859	0.607306	-0.835072	0.606341	0.530991	0.0235891	1.48948	1.23579	-0.835072	-0.835072	-0.835072	-0.835072
FGA--chr4---	1.518	0.922477	1.36108	1.25226	0.695177	0.991518	1.04185	0.827678	1.05668	0.919439	1.12902	0.751849	0.70957	-0.0223292	-0.621825	-0.261134	0.523273	1.31525	1.33515	1.43521	1.19938	1.13355	1.04444	1.78543	0.784613	1.63724	0.338297	0.181438	0.962483	1.34749	1.14405	1.74025	-0.0981496	0.806922	1.02963	1.37062	1.39886	1.45579	0.642971	1.29567	1.27249	0.735919	1.10031	1.34083	1.55024	-1.10678	1.35813	1.23807	1.46673
FGB--chr4--+	1.22928	1.26669	0.661691	1.25546	0.867925	1.13906	0.827665	1.24514	1.38048	1.11798	0.56836	0.82657	0.576331	0.224093	-0.850015	0.582385	1.15674	1.04872	1.55933	1.51403	1.22397	1.1904	1.36417	1.95784	1.14296	1.82742	0.644693	0.689342	1.2669	0.972271	1.42179	1.86995	-0.15029	0.445271	0.848378	1.90432	1.41516	1.33225	0.601849	1.27721	1.49646	0.687513	0.908144	1.64164	1.92762	-0.0673061	1.07963	0.843863	1.16414
FGG--chr4---	1.18416	0.599717	1.04078	0.7224	1.06382	0.959308	0.735634	1.26546	1.40086	1.43122	0.466715	0.833521	-0.689533	0.489009	-1.63737	0.62376	-1.63737	1.54407	1.22146	1.59234	1.78045	0.392221	1.30267	2	0.459347	1.86482	0.643475	0.977481	1.13659	1.3176	1.21596	1.71549	-1.63737	0.189419	0.681938	1.79028	1.50535	1.48648	0.0124508	1.24165	1.14045	0.713768	0.600012	1.54783	1.50735	-1.63737	1.55306	0.506706	1.38144
FGL1--chr8---	1.62274	1.43674	0.94481	1.45693	0.582947	0.13881	0.530918	1.03158	0.947804	0.618981	0.846673	0.82187	0.449639	0.585669	0.265116	0.706676	-1.79272	2	0.52497	1.09396	0.91298	1.29126	1.30739	1.64709	0.16618	1.42883	-0.0644682	-0.136355	1.45919	1.63173	0.639251	1.65104	0.276986	0.0670059	0.0493676	1.6495	-0.113818	0.698007	0.152985	0.773452	0.847711	1.15658	-0.260045	0.663766	1.24927	-1.79272	0.847538	0.810211	0.450336
FILIP1L--chr3---	-0.355242	-0.355242	-0.355242	-0.355242	-0.355242	-0.355242	-0.355242	-0.355242	-0.355242	-0.355242	-0.355242	-0.355242	-0.355242	-0.355242	-0.355242	-0.355242	-0.355242	-0.355242	-0.355242	-0.355242	-0.355242	-0.355242	-0.355242	-0.355242	-0.355242	-0.355242	-0.355242	-0.355242	-0.355242	-0.355242	-0.355242	-0.355242	-0.355242	-0.355242	-0.355242	-0.355242	-0.355242	-0.355242	-0.355242	-0.355242	-0.355242	-0.355242	-0.355242	-0.355242	-0.355242	-0.355242	-0.355242	-0.355242	-0.355242
FIS1--chr7---	0.212128	-0.856282	-0.856282	1.99792	-0.239643	-0.0756025	-0.0255308	1.01748	0.246456	0.626152	0.423801	-0.856282	-0.856282	-0.856282	-0.856282	-0.856282	-0.856282	1.95951	0.979043	1.07971	-0.205676	-0.0753812	1.02332	0.673139	0.927121	0.46268	-0.856282	-0.856282	-0.856282	1.646	1.22999	2	-0.856282	2	0.565597	0.567603	-0.856282	-0.0748968	0.230165	-0.232944	-0.856282	1.31053	0.6025	-0.856282	0.651038	-0.856282	-0.856282	-0.174715	-0.856282
FKBP11--chr12---	-0.41908	-0.41908	-0.41908	-0.41908	-0.41908	-0.41908	-0.41908	-0.41908	-0.41908	-0.41908	-0.41908	-0.41908	-0.41908	2	-0.41908	-0.41908	-0.41908	-0.41908	-0.41908	0.146678	-0.41908	-0.41908	-0.41908	0.110192	-0.41908	0.393192	-0.41908	0.862355	-0.41908	-0.41908	0.531729	-0.41908	-0.41908	-0.41908	-0.41908	0.0624524	-0.41908	0.735892	0.499028	0.502282	0.498275	2	-0.41908	-0.41908	0.536818	-0.41908	-0.41908	-0.41908	-0.41908
FKBP2--chr11--+	0.939189	-0.853745	-0.853745	-0.0550971	0.256122	0.948926	1.03974	-0.853745	-0.853745	0.0557962	-0.853745	1.75556	-0.853745	2	-0.853745	2	-0.853745	2	1.3971	1.13684	1.55216	0.513646	2	0.530973	0.539286	1.49329	-0.0637279	0.0376424	-0.853745	-0.853745	0.689373	2	-0.853745	2	0.608226	0.431487	1.50688	-0.0503274	0.964975	-0.853745	0.645022	1.94088	1.47792	2	-0.188807	-0.853745	1.237	0.763354	-0.853745
FLNA--chrX---	-0.420472	-0.420472	-0.420472	-0.420472	-0.420472	-0.420472	-0.420472	-0.420472	-0.420472	-0.420472	-0.420472	-0.420472	-0.420472	-0.420472	-0.420472	-0.420472	-0.420472	-0.420472	-0.420472	-0.420472	-0.420472	0.205066	-0.420472	-0.420472	-0.420472	-0.420472	-0.420472	-0.420472	-0.420472	-0.420472	-0.420472	-0.420472	-0.420472	-0.420472	-0.420472	-0.420472	-0.420472	-0.420472	-0.420472	-0.420472	-0.420472	-0.420472	-0.420472	-0.420472	-0.420472	-0.420472	-0.420472	-0.420472	-0.420472
FMO5--chr1---	2	1.61098	-0.535556	0.64209	-0.535556	1.48023	-0.535556	0.480802	1.13634	-0.535556	1.40521	-0.535556	-0.535556	0.920371	2	-0.535556	-0.535556	-0.535556	-0.535556	-0.535556	1.18098	1.48073	-0.535556	2	-0.535556	-0.535556	-0.535556	0.778839	2	-0.535556	2	0.992675	1.26378	-0.535556	0.742704	2	2	0.649123	0.406166	0.409504	0.405394	-0.535556	1.67614	-0.535556	1.74973	-0.535556	-0.535556	0.497785	-0.535556
FN1--chr2---	0.570873	0.0557091	-1.1768	2	1.12894	0.903361	1.21764	1.08626	1.16382	0.823987	1.05816	1.93575	0.238623	-1.1768	1.27296	2	-1.1768	-1.1768	0.420916	0.860911	0.141798	1.01709	1.25826	0.971024	0.934448	1.57921	0.628616	-0.422096	-1.1768	-1.1768	0.404428	0.267452	-1.1768	0.281047	-0.442844	0.328833	-1.1768	0.350548	0.977315	0.0966684	0.976165	1.1893	1.17778	-1.1768	1.48408	-1.1768	1.42065	0.715361	-1.1768
FOS--chr14--+	-0.866734	-0.866734	-0.866734	-0.866734	-0.492881	-0.866734	-0.36307	-0.866734	-0.866734	-0.866734	-0.866734	-0.866734	0.119022	1.44784	-0.866734	-0.866734	-0.866734	-0.866734	-0.866734	-0.442186	-0.866734	-0.866734	-0.866734	-0.866734	-0.866734	-0.866734	-0.866734	-0.866734	-0.866734	-0.866734	-0.476741	-0.866734	-0.866734	-0.866734	-0.866734	-0.866734	0.525208	-0.866734	-0.866734	-0.866734	-0.490463	1.0388	-0.866734	-0.866734	-0.866734	-0.866734	-0.866734	-0.866734	-0.866734
FTCD--chr21---	-0.644326	0.444552	-0.644326	2	0.756637	0.368897	0.433884	-0.644326	1.6807	0.50377	1.01706	-0.644326	-0.644326	-0.644326	2	1.80317	-0.644326	-0.644326	1.17071	0.923986	0.825108	1.0817	1.79516	1.7549	1.6703	-0.644326	0.352897	0.480855	-0.644326	2	-0.644326	1.5089	-0.644326	-0.644326	-0.644326	-0.22151	-0.644326	0.369813	0.765744	0.164688	0.764713	-0.644326	1.55705	-0.644326	-0.644326	-0.644326	-0.644326	0.88693	-0.644326
FTH1--chr11---	0.430638	-1.41066	1.226	1.73678	0.150878	0.0295851	2	0.162599	-0.793466	0.602472	2	-0.309836	-1.95432	-0.171918	-1.95432	0.559151	-1.95432	1.32829	0.422865	0.499604	0.371703	1.40524	0.553649	1.00851	-0.0737959	0.77696	0.329161	0.483866	1.45347	0.336188	0.67934	1.22907	-1.95432	1.30588	0.122929	-0.261805	0.600502	-0.817394	0.453621	0.390805	0.452613	0.803226	0.621198	0.644516	-0.444179	-0.0451701	0.931414	0.695057	0.214339
FTL--chr19--+	-0.0292712	-0.776564	0.685737	2	-0.489071	-0.128265	2	-0.00447439	-0.494864	0.267174	2	0.169615	-2	-0.423361	-1.16281	1.07412	-0.545841	1.34761	-1.03632	-0.0525121	-0.408932	1.05135	0.665184	0.350793	0.0995484	-0.469559	0.360009	-0.522079	-0.330161	1.52952	0.741166	1.35149	-1.30828	2	-0.0481459	0.215348	0.847869	-1.30472	0.236594	-0.793584	-0.254211	-0.387034	0.254815	0.457239	-0.904712	-1.39661	0.576232	-0.111637	-0.368511
FUOM--chr10---	1.72925	0.847384	2	1.5705	1.21528	0.754959	1.30365	0.993172	-0.669879	-0.669879	0.701935	-0.669879	1.07256	-0.669879	-0.669879	1.35103	-0.669879	-0.669879	0.216581	0.850293	0.0273494	0.755313	2	0.0357188	-0.669879	2	0.153533	0.891252	-0.669879	2	0.938469	2	0.601966	1.64378	-0.669879	1.46503	1.79054	0.1675	1.22572	-0.00187219	-0.00477707	-0.669879	1.14781	1.84934	-0.669879	-0.669879	-0.669879	1.01558	0.54347
FUS--chr16--+	-0.493222	-0.493222	2	0.594037	-0.493222	-0.493222	-0.493222	-0.493222	-0.493222	1.58183	-0.493222	-0.493222	-0.493222	-0.493222	-0.493222	-0.493222	-0.493222	-0.493222	-0.493222	0.48697	-0.493222	-0.493222	-0.493222	-0.493222	0.623321	-0.493222	-0.493222	-0.493222	-0.493222	-0.493222	-0.493222	-0.493222	1.16801	0.933222	-0.493222	-0.493222	-0.493222	-0.493222	-0.493222	-0.493222	0.375509	-0.493222	1.54872	-0.493222	-0.493222	-0.493222	-0.493222	0.460809	-0.493222
FXYD1--chr19--+	1.46936	0.013977	2	2	0.848135	0.45873	0.525961	0.660245	0.877433	0.055341	1.58086	-0.746607	-0.746607	0.123964	-0.746607	1.79608	-0.746607	-0.746607	0.5212	0.866098	1.16007	1.00685	2	0.474307	1.45203	1.77003	-0.0500441	-0.746607	-0.746607	2	0.900069	2	0.329306	0.771581	0.542422	0.821345	-0.746607	-0.0382287	0.23833	0.861284	0.574865	-0.746607	2	2	-0.746607	-0.746607	1.09682	1.63532	0.279822
FXYD2--chr11---	-0.464713	-0.464713	-0.464713	0.247663	-0.464713	0.251271	-0.464713	0.150098	-0.464713	-0.464713	2	-0.464713	-0.464713	0.416	-0.464713	-0.464713	-0.464713	-0.464713	-0.464713	-0.464713	0.573648	-0.0694568	-0.464713	-0.136313	-0.464713	-0.464713	0.239965	0.871306	-0.464713	1.8302	1.44867	-0.464713	-0.464713	2	-0.464713	-0.165934	1.64092	-0.464713	-0.464713	-0.464713	-0.464713	-0.464713	-0.0206481	-0.464713	0.568114	-0.464713	-0.464713	0.160372	-0.464713
FXYD5--chr19--+	-0.413644	-0.413644	-0.413644	-0.413644	-0.413644	-0.413644	-0.413644	-0.413644	-0.413644	-0.413644	-0.413644	-0.413644	-0.413644	0.890649	-0.413644	-0.413644	-0.413644	-0.413644	-0.413644	-0.413644	-0.413644	-0.413644	-0.413644	-0.413644	-0.413644	-0.413644	-0.413644	-0.413644	-0.413644	-0.413644	-0.413644	-0.413644	-0.413644	-0.413644	-0.413644	-0.413644	-0.413644	-0.413644	-0.413644	-0.413644	-0.413644	-0.413644	-0.413644	-0.413644	-0.413644	-0.413644	-0.413644	-0.413644	-0.413644
FYB--chr5---	-0.340599	-0.340599	-0.340599	-0.340599	-0.340599	-0.340599	-0.340599	-0.340599	-0.340599	-0.340599	-0.340599	-0.340599	-0.340599	-0.340599	-0.340599	-0.340599	-0.340599	-0.340599	-0.340599	-0.340599	-0.340599	-0.340599	-0.340599	-0.340599	-0.340599	-0.340599	-0.340599	-0.340599	-0.340599	-0.340599	-0.340599	-0.340599	-0.340599	-0.340599	-0.340599	-0.340599	-0.340599	-0.340599	-0.340599	-0.340599	-0.340599	-0.340599	-0.340599	-0.340599	-0.340599	-0.340599	-0.340599	-0.340599	-0.340599
G0S2--chr1--+	1.43587	0.396723	-0.566827	2	-0.566827	1.8431	0.387282	-0.566827	1.4906	0.449125	1.76747	-0.566827	1.30053	1.26085	-0.566827	-0.566827	-0.566827	-0.566827	-0.566827	1.47624	-0.566827	-0.566827	1.59188	0.189356	-0.566827	1.28261	-0.566827	0.428847	2	-0.566827	1.15683	1.89193	-0.566827	1.91271	0.401475	-0.192676	-0.566827	0.330586	1.46467	0.14907	1.10729	-0.566827	0.430455	2	1.16431	-0.566827	-0.566827	-0.566827	2
GABARAP--chr17---	0.793707	-0.854388	-0.854388	1.12148	-0.854388	-0.854388	1.50257	-0.854388	-0.854388	0.546714	0.355465	-0.854388	-0.854388	-0.854388	-0.854388	0.927923	-0.854388	-0.854388	1.49564	0.287687	-0.854388	0.40254	-0.854388	0.892774	-0.854388	-0.335003	-0.128191	-0.854388	1.06314	1.5106	-0.246419	1.53069	0.267299	0.108764	-0.0575356	-0.546485	1.31554	-0.854388	-0.267329	0.175694	-0.854388	0.451284	0.267299	2	-0.854388	-0.854388	-0.854388	-0.210215	-0.854388
GABARAPL2--chr16--+	0.365737	-0.567363	-0.567363	-0.567363	1.08493	-0.567363	0.704275	0.458771	-0.567363	-0.567363	-0.567363	-0.567363	-0.567363	0.902567	-0.567363	-0.567363	-0.567363	-0.567363	-0.567363	0.0185277	0.428525	-0.567363	-0.567363	-0.0192563	-0.567363	-0.567363	-0.567363	-0.567363	-0.567363	-0.567363	-0.567363	-0.567363	-0.567363	-0.567363	0.723191	-0.567363	-0.567363	-0.567363	-0.567363	0.386786	-0.567363	1.54726	0.761817	-0.567363	0.422551	-0.567363	-0.567363	-0.567363	-0.567363
GADD45B--chr19--+	-0.754529	-0.112586	-0.754529	-0.160198	-0.754529	-0.754529	-0.754529	-0.241596	-0.754529	0.725735	-0.754529	-0.754529	-0.754529	-0.754529	-0.754529	-0.754529	-0.754529	-0.754529	-0.754529	-0.46166	-0.754529	-0.754529	-0.754529	0.120993	0.282125	-0.33405	-0.166621	-0.754529	-0.754529	-0.754529	0.103074	-0.754529	-0.754529	0.0252113	-0.754529	-0.50526	-0.754529	-0.754529	-0.279263	-0.754529	-0.754529	-0.754529	-0.0901124	-0.754529	-0.259701	-0.754529	-0.754529	-0.754529	-0.754529
GAMT--chr19---	1.79592	1.35063	2	1.22557	0.26557	2	1.9287	1.97243	0.925568	0.62939	1.16636	-0.571668	-0.571668	-0.571668	-0.571668	1.98873	-0.571668	-0.571668	1.32709	-0.0519809	1.91576	1.53793	2	0.322291	-0.571668	0.750225	0.471557	1.40621	-0.571668	-0.571668	0.301715	2	1.0397	0.811957	1.35888	0.574915	2	0.489253	-0.571668	-0.571668	0.270985	-0.571668	0.607319	2	0.306389	-0.571668	-0.571668	2	-0.571668
GAPDH--chr12--+	0.0786437	0.289846	0.753939	0.189327	-0.2939	-0.298455	1.19587	-0.454888	-0.803739	-0.157582	1.50719	1.11698	-0.397347	0.233399	0.525578	1.87888	1.11994	0.526908	0.645372	0.157912	-0.0266229	0.196153	1.34599	0.616526	-0.275021	0.112791	-0.0493617	1.0136	1.13967	1.08532	-0.249402	1.1043	-0.738443	0.31514	0.0638944	-0.0207203	0.123064	-1.05336	0.769996	0.411054	-1.17823	0.781083	1.08238	0.165685	-0.0335955	0.628185	1.79881	-0.438648	-0.237222
GATM--chr15---	0.815261	-0.620562	2	1.15834	1.32809	1.16622	-0.620562	0.941889	0.861395	0.568239	2	-0.620562	-0.620562	-0.620562	-0.620562	1.9137	-0.620562	2	-0.620562	0.68508	2	-0.0413848	-0.620562	2	0.451412	2	-0.620562	-0.620562	-0.620562	-0.620562	0.243908	-0.620562	0.974363	0.748943	-0.620562	1.50676	2	0.429532	0.839501	1.34535	0.838434	-0.620562	0.0301355	-0.620562	0.248535	-0.620562	2	0.295387	2
GC--chr4---	1.94601	1.21281	2	0.984304	0.997026	1.58803	0.44583	1.01023	1.20517	0.303141	0.499545	1.71974	0.863927	0.130744	-1.37491	-1.37491	-1.37491	-1.37491	1.30347	0.961761	1.32654	0.860746	0.667367	1.45615	-0.385731	0.848099	0.350626	0.499519	0.799546	2	0.849833	1.70721	0.0172077	0.481894	1.09864	1.10094	0.301354	0.554727	1.09736	1.34303	0.690371	1.17248	0.395644	1.55321	1.0604	-1.37491	0.803558	0.387759	0.333534
GCC2--chr2--+	0.360983	-0.495844	-0.495844	-0.495844	0.370895	-0.495844	-0.495844	-0.495844	-0.495844	-0.495844	-0.495844	-0.495844	-0.495844	-0.495844	-0.495844	-0.495844	-0.495844	-0.495844	-0.495844	-0.495844	-0.495844	0.109923	-0.495844	-0.495844	0.625345	0.276574	-0.495844	-0.495844	-0.495844	-0.495844	-0.495844	-0.495844	-0.495844	0.936535	0.689218	-0.037938	-0.495844	-0.495844	-0.495844	0.380311	-0.495844	1.44592	-0.495844	-0.495844	0.413153	2	-0.495844	-0.495844	-0.495844
GCHFR--chr15--+	0.320678	-0.54593	-0.54593	0.558317	-0.54593	-0.54593	2	1.10691	1.02176	1.56155	1.27388	-0.54593	-0.54593	-0.54593	-0.54593	-0.54593	-0.54593	-0.54593	2	1.17193	2	1.66294	2	1.08076	1.98941	2	-0.54593	1.52502	-0.54593	-0.54593	0.36855	1.81261	-0.54593	-0.54593	-0.54593	1.47831	-0.54593	0.564912	0.998598	1.53371	0.997469	-0.54593	2	-0.54593	2	-0.54593	-0.54593	-0.54593	-0.54593
GIMAP7--chr7--+	-0.395476	-0.395476	-0.395476	-0.395476	-0.395476	-0.395476	-0.395476	-0.395476	-0.395476	-0.395476	-0.395476	-0.395476	-0.395476	-0.395476	-0.395476	-0.395476	-0.395476	-0.395476	-0.395476	-0.395476	-0.395476	-0.395476	-0.395476	-0.395476	-0.395476	-0.395476	-0.395476	-0.395476	-0.395476	-0.395476	-0.395476	-0.395476	-0.395476	-0.395476	-0.395476	-0.395476	-0.395476	-0.395476	-0.395476	-0.395476	-0.395476	-0.395476	0.203785	-0.395476	-0.395476	-0.395476	-0.395476	-0.395476	-0.395476
GMFG--chr19---	-0.636799	-0.636799	-0.636799	-0.636799	-0.636799	-0.636799	-0.636799	-0.636799	-0.636799	-0.636799	-0.636799	-0.636799	-0.636799	-0.636799	-0.636799	-0.636799	-0.636799	-0.636799	-0.636799	-0.636799	-0.636799	-0.636799	-0.636799	-0.636799	-0.636799	-0.636799	-0.636799	-0.636799	-0.636799	-0.636799	-0.636799	-0.636799	-0.636799	-0.636799	-0.636799	-0.636799	-0.636799	-0.636799	-0.636799	-0.636799	-0.636799	-0.636799	-0.636799	-0.636799	-0.636799	-0.636799	-0.636799	-0.636799	-0.636799
GNAS--chr20--+	1.49056	-0.721388	-0.721388	-0.721388	-0.0419788	0.13876	-0.721388	-0.721388	-0.721388	0.253258	-0.721388	-0.721388	1.07004	1.03198	-0.721388	-0.721388	-0.721388	-0.721388	0.189998	-0.721388	-0.0045543	-0.246546	-0.721388	0.00405045	-0.721388	-0.115914	-0.721388	0.233804	-0.721388	-0.721388	-0.012647	0.389203	-0.721388	0.401409	-0.721388	-0.721388	-0.721388	-0.721388	-0.037023	0.89038	0.474779	-0.721388	-0.18791	-0.721388	-0.721388	-0.721388	-0.721388	0.0295583	-0.721388
GNB2L1--chr5---	-0.110932	-0.38298	0.958486	-0.00967081	-0.671411	-0.45593	0.911185	-0.175201	-0.9182	-0.648372	-0.792171	1.31027	-1.70185	0.252829	-1.70185	-1.70185	0.841726	-1.70185	-1.11402	-0.326052	-0.039003	-0.00342611	0.285958	-0.496737	-0.434491	-0.378425	-0.77009	0.122586	0.414612	-1.70185	0.0970308	0.678089	-1.70185	0.525079	-0.124426	-0.122566	0.639806	-0.756262	-0.444837	-0.662285	-0.0913422	0.531711	0.54601	-1.70185	-0.901562	0.391828	-1.70185	-0.584188	-0.897253
GNG11--chr7--+	-0.4082	-0.4082	-0.4082	-0.4082	-0.4082	-0.4082	-0.4082	-0.4082	-0.4082	-0.4082	-0.4082	-0.4082	-0.4082	-0.4082	-0.4082	-0.4082	-0.4082	-0.4082	-0.4082	-0.4082	-0.4082	-0.4082	-0.4082	-0.4082	-0.4082	-0.4082	-0.4082	-0.4082	-0.4082	-0.4082	-0.4082	-0.4082	-0.4082	-0.4082	-0.4082	0.0440565	-0.4082	-0.4082	0.454089	-0.4082	-0.4082	-0.4082	-0.4082	-0.4082	-0.4082	-0.4082	-0.4082	-0.4082	-0.4082
GNG5--chr1---	0.611882	-0.724192	-0.724192	1.89011	0.0469306	0.252067	1.0312	0.729713	-0.724192	-0.724192	-0.724192	-0.724192	-0.724192	0.47668	-0.724192	-0.724192	-0.724192	-0.724192	-0.724192	0.151497	-0.724192	1.21881	1.6263	-0.276411	0.27331	0.925203	0.236652	-0.724192	-0.724192	2	0.677426	1.95301	-0.724192	0.550171	-0.724192	-0.316801	-0.724192	-0.724192	-0.724192	0.0553082	0.633444	1.00337	0.361692	-0.724192	0.0845269	-0.724192	1.81864	0.128124	-0.724192
GNLY--chr2--+	-0.214372	-0.214372	-0.214372	-0.214372	-0.214372	-0.214372	-0.214372	-0.214372	-0.214372	-0.214372	-0.214372	-0.214372	-0.214372	-0.214372	-0.214372	-0.214372	-0.214372	-0.214372	-0.214372	-0.214372	-0.214372	-0.214372	-0.214372	-0.214372	-0.214372	-0.214372	-0.214372	-0.214372	-0.214372	-0.214372	-0.214372	-0.214372	-0.214372	-0.214372	-0.214372	-0.214372	-0.214372	-0.214372	-0.214372	-0.214372	-0.214372	-0.214372	-0.214372	-0.214372	-0.214372	-0.214372	-0.214372	-0.214372	-0.214372
GOLGA4--chr3--+	1.0356	0.68594	-0.592634	1.42465	-0.592634	-0.592634	-0.592634	0.428988	1.08792	-0.592634	-0.592634	-0.592634	-0.592634	-0.592634	-0.592634	-0.592634	-0.592634	-0.592634	0.667976	-0.592634	0.398875	0.0641569	-0.592634	1.15117	0.622992	0.891104	-0.592634	0.728567	-0.592634	-0.592634	1.69455	-0.592634	-0.592634	2	0.692245	0.69433	-0.592634	0.59818	-0.592634	0.35732	0.353189	1.51269	0.145261	-0.592634	1.1236	-0.592634	-0.592634	1.80421	2
GOLGB1--chr3---	-0.578223	-0.578223	-0.578223	0.484998	-0.578223	0.490382	1.34321	-0.578223	0.931221	-0.578223	-0.578223	-0.578223	-0.578223	1.60007	-0.578223	-0.578223	-0.578223	-0.578223	-0.578223	-0.578223	-0.578223	0.490685	-0.578223	0.677092	0.513635	0.754449	0.473508	0.60846	-0.578223	-0.578223	0.302281	-0.578223	-0.578223	-0.578223	-0.578223	-0.132296	-0.578223	-0.578223	-0.578223	0.275011	0.271301	-0.578223	-0.578223	-0.578223	-0.578223	-0.578223	-0.578223	-0.578223	-0.578223
GOT1--chr10---	-0.575762	0.679591	-0.575762	-0.575762	2	0.592369	1.52463	-0.575762	1.07427	-0.575762	2	-0.575762	1.85711	-0.575762	-0.575762	-0.575762	-0.575762	-0.575762	0.661954	-0.00304123	2	0.592701	-0.575762	0.409426	0.617787	-0.575762	0.573924	-0.575762	-0.575762	-0.575762	1.10133	0.932485	-0.575762	-0.575762	-0.575762	-0.0883032	2	1.41524	0.353645	0.356939	-0.575762	1.49133	0.72354	-0.575762	-0.575762	-0.575762	-0.575762	-0.575762	-0.575762
GPX1--chr3---	1.19734	-0.696233	-0.696233	1.7869	-0.114613	-0.696233	0.627772	-0.696233	-0.696233	-0.696233	1.22084	-0.696233	-0.696233	-0.696233	-0.696233	-0.696233	-0.696233	-0.696233	0.0839753	-0.335212	-0.0825748	0.957808	1.07663	-0.0752086	0.0561346	0.222073	0.540463	0.121476	1.21739	-0.696233	-0.696233	0.86859	-0.696233	1.70251	-0.696233	0.100287	-0.696233	-0.696233	0.328515	-0.696233	-0.696233	0.606779	0.122797	-0.696233	-0.0862556	-0.696233	-0.696233	-0.0533721	-0.696233
GPX4--chr19--+	1.09451	-0.512759	0.552474	0.514058	0.24212	-0.560582	1.0555	-0.247223	-1.20106	-0.475326	0.466414	2	0.132861	-0.413225	-1.20106	1.60303	-1.20106	2	-0.0537428	0.506114	0.524413	1.06006	1.59634	0.190199	-0.0895459	0.67166	0.219238	-0.489811	1.24231	2	0.289118	1.12969	-1.20106	1.36984	0.865588	0.217876	0.682509	-0.560003	-0.691471	-0.306913	-0.00517794	0.576615	1.7627	-1.20106	0.0355593	0.441585	0.467166	0.0892403	-1.20106
GRHPR--chr9--+	1.27475	-0.715144	1.72394	-0.715144	1.5948	1.28556	1.38635	1.4231	-0.715144	-0.715144	0.745623	-0.715144	-0.715144	-0.715144	-0.715144	-0.715144	2	2	1.37924	0.39353	1.37547	0.175981	2	0.331384	1.31999	1.66334	1.26042	0.947215	-0.715144	2	0.997494	1.17807	0.639172	-0.715144	0.907433	0.492439	2	-0.715144	2	0.52857	-0.715144	0.861315	0.275765	1.96743	-0.715144	-0.715144	-0.715144	-0.715144	-0.715144
GSN--chr9--+	0.102589	0.379943	2	0.304706	-0.634476	0.309461	0.370004	1.2419	-0.634476	-0.634476	0.913302	-0.634476	-0.634476	-0.634476	-0.634476	-0.634476	-0.634476	-0.634476	-0.634476	0.540236	0.734477	-0.113379	-0.634476	0.474389	2	0.0299793	0.950872	-0.634476	-0.634476	-0.634476	-0.634476	0.5843	-0.634476	0.597695	-0.634476	-0.240573	2	0.310315	0.679172	-0.634476	0.678212	-0.634476	-0.634476	-0.634476	1.57063	-0.634476	-0.634476	0.189622	-0.634476
GSTA1--chr6---	0.787167	0.379482	2	1.2877	0.801405	1.1074	1.19267	1.17124	-0.121919	-0.0220998	0.945281	1.12186	1.07696	0.733447	-1.37085	1.59082	1.12452	0.592253	1.46097	1.18885	2	1.41978	2	1.39974	0.652355	1.25268	0.981372	-0.355247	0.705505	1.55429	-0.104512	1.98515	-1.37085	2	0.723147	1.46278	1.97828	-0.443179	0.484156	0.213832	0.809413	-0.407727	0.420977	0.268043	0.400047	-1.37085	1.95107	0.825957	-0.581498
GSTA2--chr6---	0.0330656	-0.646664	1.73667	1.30048	2	0.223845	-0.646664	0.100837	-0.646664	-0.646664	-0.646664	-0.646664	2	1.12782	2	-0.646664	-0.646664	2	2	0.935079	1.9625	1.08587	1.44922	1.24428	2	-0.646664	2	-0.646664	-0.646664	-0.646664	0.603127	1.20327	0.676695	2	0.293458	0.533316	2	0.224632	0.564796	0.984517	-0.646664	-0.646664	0.676695	-0.646664	0.60907	-0.646664	1.62072	1.10706	-0.646664
GSTK1--chr7--+	0.118299	-0.661448	-0.661448	-0.661448	-0.661448	-0.661448	-0.661448	-0.661448	0.749109	1.23479	0.975958	-0.661448	-0.661448	-0.661448	-0.661448	-0.661448	-0.661448	-0.661448	-0.661448	1.15304	0.170768	0.714263	-0.661448	0.180758	-0.661448	0.0414844	-0.661448	-0.661448	-0.661448	-0.661448	1.66196	1.4607	-0.661448	0.642075	0.417006	0.418756	-0.661448	0.338053	0.133073	0.135889	-0.661448	-0.661448	0.856635	2	0.165776	-0.661448	1.93957	0.210371	-0.661448
GSTO1--chr10--+	0.493277	-1.03924	1.69231	0.798066	0.506754	1.0608	0.194429	0.848778	0.535156	-1.03924	0.0857686	-1.03924	-1.03924	1.37812	-1.03924	0.618081	2	-1.03924	-1.03924	1.01795	0.570847	-0.35294	2	0.144354	-0.338206	0.375998	0.482241	-1.03924	-1.03924	2	-0.0541979	2	-1.03924	-1.03924	-0.298269	0.60023	2	-0.352515	-0.49335	0.2464	-0.493797	0.174869	-0.276092	1.02674	1.50926	-1.03924	0.747833	0.342982	0.570881
GSTP1--chr11--+	-0.620438	-0.620438	-0.620438	-0.620438	-0.620438	0.0583718	-0.620438	-0.620438	-0.620438	-0.620438	-0.620438	-0.620438	-0.620438	0.763279	-0.620438	-0.620438	-0.620438	-0.620438	-0.620438	-0.620438	-0.620438	-0.245704	-0.620438	-0.620438	-0.620438	-0.142611	-0.620438	-0.620438	-0.620438	-0.620438	-0.620438	-0.620438	-0.620438	-0.620438	-0.620438	-0.337172	-0.620438	-0.620438	-0.620438	-0.620438	-0.620438	1.74288	-0.620438	-0.620438	-0.058122	-0.620438	-0.620438	-0.620438	-0.620438
GTF2H5--chr6--+	1.04182	-0.552423	-0.552423	0.606609	-0.552423	-0.552423	-0.552423	1.18242	-0.552423	-0.552423	-0.552423	-0.552423	1.87372	-0.552423	-0.552423	-0.552423	-0.552423	-0.552423	0.68187	0.0187143	-0.552423	1.05239	-0.552423	-0.0181183	0.637826	-0.552423	-0.552423	-0.552423	-0.552423	2	1.12003	-0.552423	1.21848	1.94644	-0.552423	1.02661	-0.552423	-0.552423	0.374415	1.07385	0.373655	1.50895	0.170068	-0.552423	-0.552423	-0.552423	-0.552423	0.464586	1.13703
GUK1--chr1--+	0.464187	0.867558	-0.917237	0.355752	-0.32422	-0.917237	1.48101	0.200861	-0.917237	-0.0665249	0.31381	-0.917237	-0.917237	-0.917237	1.78905	0.896297	-0.917237	-0.917237	-0.12174	0.628585	-0.291554	0.769216	0.890366	-0.57288	-0.150127	-0.388753	-0.917237	-0.917237	-0.917237	2	0.526072	1.50962	-0.917237	0.0627878	-0.917237	0.100442	-0.917237	0.362405	0.127591	0.788425	-0.917237	-0.917237	1.0984	1.34348	-0.917237	-0.917237	-0.917237	0.595268	-0.917237
GZMA--chr5--+	-0.362893	-0.362893	-0.362893	-0.362893	-0.362893	-0.362893	-0.362893	-0.362893	-0.362893	-0.362893	-0.362893	-0.362893	-0.362893	-0.362893	-0.362893	-0.362893	-0.362893	-0.362893	-0.362893	-0.362893	-0.362893	-0.362893	-0.362893	-0.362893	-0.362893	-0.362893	-0.362893	-0.362893	-0.362893	-0.362893	-0.362893	-0.362893	-0.362893	-0.362893	-0.362893	-0.362893	-0.362893	-0.362893	-0.362893	-0.362893	-0.362893	-0.362893	-0.362893	-0.362893	-0.362893	-0.362893	-0.362893	-0.362893	-0.362893
H19--chr11---	-0.409221	-0.409221	2	-0.409221	-0.409221	-0.409221	-0.409221	1.87367	-0.409221	-0.409221	-0.409221	-0.409221	-0.409221	-0.409221	-0.409221	-0.409221	-0.409221	2	0.807633	0.620913	-0.409221	0.224773	-0.409221	1.84068	-0.409221	-0.409221	-0.409221	-0.409221	-0.409221	-0.409221	-0.409221	-0.409221	-0.409221	1.0899	0.83106	-0.409221	-0.409221	0.74026	-0.409221	2	0.503772	-0.409221	1.73677	-0.409221	1.80817	-0.409221	-0.409221	0.593419	-0.409221
H2AFJ--chr12--+	-0.632343	-0.632343	-0.632343	1.73246	0.0651862	-0.632343	0.307386	-0.632343	1.39407	-0.632343	-0.632343	-0.632343	-0.632343	-0.632343	-0.632343	1.5008	-0.632343	2	-0.632343	-0.199375	-0.632343	-0.144837	-0.632343	-0.632343	-0.632343	-0.632343	-0.632343	0.348324	1.66264	-0.632343	0.0953002	1.24433	-0.632343	-0.632343	0.321364	0.322912	-0.632343	-0.632343	0.0702742	-0.632343	-0.632343	-0.632343	-0.632343	-0.632343	-0.632343	-0.632343	2	0.138631	0.648395
H2AFZ--chr4---	-0.580566	-0.580566	-0.580566	-0.580566	-0.580566	-0.580566	-0.580566	-0.580566	-0.580566	0.498403	-0.580566	-0.580566	-0.580566	-0.580566	-0.580566	-0.580566	-0.580566	-0.580566	-0.580566	-0.113706	-0.580566	-0.580566	-0.580566	-0.143813	-0.580566	-0.580566	-0.580566	-0.580566	-0.580566	-0.580566	0.204037	-0.580566	-0.580566	-0.580566	-0.580566	-0.183208	-0.580566	-0.580566	-0.580566	-0.580566	-0.580566	-0.580566	-0.580566	-0.580566	-0.580566	-0.580566	-0.580566	-0.580566	-0.580566
H3F3AP4--chr1--+	0.0460011	-0.195157	-1.23624	0.0478057	0.0572768	-1.23624	-0.204043	-0.0951233	-0.425365	-0.146163	0.258312	-1.23624	-1.23624	-0.530109	-1.23624	-1.23624	-1.23624	-1.23624	0.373483	0.293895	-0.122439	-0.919337	-1.23624	0.0107397	-0.649694	0.133162	0.28877	-1.23624	-1.23624	0.603759	-0.412067	0.852807	-1.23624	-0.00481745	0.13374	-0.458104	-1.23624	-0.661666	-0.163659	-0.434822	-0.164377	-0.220409	0.0109842	-1.23624	-0.408148	-1.23624	-1.23624	-0.735066	-1.23624
H3F3B--chr17---	-1.26114	-0.695977	0.178691	-0.369447	-1.26114	-0.735244	-0.315539	-0.477944	-1.26114	-0.262514	-1.26114	-1.26114	-0.165855	1.19603	-1.26114	-1.26114	-1.26114	0.635691	-0.703917	-0.0627944	-0.822867	0.254585	0.623165	0.0792649	-0.0597702	-0.890953	-0.743549	-0.279823	-1.26114	-1.26114	-0.50611	0.18103	-1.26114	0.193214	-1.26114	-0.692268	0.285463	-0.734769	-0.529267	-1.26114	-0.529802	0.198513	-0.461666	-1.26114	-0.825496	-1.26114	-1.26114	-0.201673	-0.498436
HADHA--chr2---	1.09071	-0.541697	2	-0.541697	0.400457	0.651093	-0.541697	0.482545	-0.541697	0.809869	-0.541697	2	-0.541697	-0.541697	-0.541697	-0.541697	-0.541697	-0.541697	-0.541697	0.0431139	0.452355	0.116778	-0.541697	0.464287	-0.541697	0.29793	-0.541697	0.782893	-0.541697	-0.541697	-0.541697	-0.541697	-0.541697	-0.541697	0.746478	-0.0439478	2	-0.541697	1.11827	0.410693	-0.541697	-0.541697	-0.541697	-0.541697	1.17894	-0.541697	-0.541697	-0.541697	-0.541697
HBA1--chr16--+	-0.383879	-0.383879	-0.383879	-0.383879	-0.383879	-0.383879	-0.383879	-0.383879	-0.383879	-0.383879	-0.383879	-0.383879	-0.383879	-0.383879	-0.383879	-0.383879	1.73787	-0.383879	-0.383879	-0.383879	-0.383879	-0.383879	-0.383879	-0.383879	0.0889683	-0.383879	-0.383879	-0.383879	-0.383879	-0.383879	-0.383879	-0.383879	-0.383879	-0.383879	-0.383879	-0.383879	-0.383879	-0.383879	-0.383879	-0.383879	-0.383879	-0.383879	-0.383879	-0.383879	-0.383879	-0.383879	-0.383879	-0.383879	-0.383879
HBA1-HBA2--chr16--+	-0.203951	-0.203951	-0.203951	-0.203951	-0.203951	-0.203951	-0.203951	-0.203951	-0.203951	-0.203951	-0.203951	-0.203951	-0.203951	-0.203951	-0.203951	-0.203951	-0.203951	-0.203951	-0.203951	-0.203951	-0.203951	-0.203951	-0.203951	0.110588	-0.203951	-0.203951	-0.203951	-0.203951	-0.203951	-0.203951	-0.203951	-0.203951	-0.203951	-0.203951	-0.203951	-0.203951	-0.203951	-0.203951	-0.203951	-0.203951	-0.203951	-0.203951	-0.203951	-0.203951	-0.203951	-0.203951	-0.203951	-0.203951	-0.203951
HBA2--chr16--+	-0.199981	-0.517622	-0.517622	-0.517622	-0.517622	-0.517622	-0.0847377	-0.517622	-0.517622	-0.517622	-0.517622	-0.517622	-0.517622	-0.517622	-0.517622	-0.517622	-0.517622	-0.517622	-0.517622	-0.517622	-0.517622	-0.517622	-0.517622	-0.517622	-0.517622	-0.517622	-0.517622	-0.517622	-0.517622	-0.517622	-0.517622	-0.517622	-0.517622	-0.517622	-0.517622	-0.517622	-0.517622	-0.517622	-0.517622	-0.517622	-0.517622	-0.517622	-0.517622	-0.517622	-0.517622	-0.517622	-0.517622	-0.517622	-0.517622
HBB--chr11---	-0.788152	-0.788152	-0.788152	-0.788152	-0.788152	-0.788152	-0.788152	-0.788152	-0.788152	-0.788152	-0.788152	0.392606	-0.788152	-0.341349	-0.788152	-0.788152	-0.788152	-0.788152	-0.788152	-0.610063	-0.788152	-0.788152	-0.788152	-0.788152	-0.788152	-0.788152	-0.788152	-0.788152	-0.788152	-0.788152	-0.488857	-0.788152	-0.788152	-0.788152	-0.788152	-0.788152	-0.788152	-0.788152	-0.499151	-0.788152	-0.788152	-0.788152	-0.384132	-0.788152	-0.487255	-0.788152	-0.788152	-0.788152	-0.788152
HCST--chr19--+	-0.44888	-0.44888	-0.44888	-0.44888	-0.44888	-0.44888	-0.44888	-0.44888	-0.44888	-0.44888	-0.44888	-0.44888	-0.44888	-0.44888	-0.44888	-0.44888	-0.44888	-0.44888	-0.44888	-0.44888	-0.44888	-0.44888	-0.44888	-0.44888	-0.44888	-0.44888	-0.44888	-0.44888	-0.44888	-0.44888	-0.44888	-0.44888	-0.44888	-0.44888	-0.44888	-0.44888	-0.44888	-0.44888	-0.44888	-0.44888	-0.44888	-0.44888	-0.44888	-0.44888	-0.44888	-0.44888	-0.44888	-0.44888	-0.44888
HDLBP--chr2---	1.02644	1.55816	-0.608877	1.41718	0.334953	-0.608877	0.662675	1.17066	2	-0.608877	1.35042	-0.608877	1.87977	1.82689	-0.608877	2	-0.608877	-0.608877	0.657214	-0.023026	1.12405	0.0507696	-0.608877	1.73206	1.46483	1.85589	0.567166	-0.608877	-0.608877	-0.608877	1.68826	0.933948	-0.608877	-0.608877	-0.608877	0.683683	-0.608877	0.587115	1.05404	0.345207	1.05283	-0.608877	1.20764	-0.608877	-0.608877	-0.608877	-0.608877	-0.608877	2
HERPUD1--chr16--+	-0.556748	0.510839	-0.556748	-0.556748	-0.556748	-0.556748	-0.556748	0.296288	-0.556748	-0.556748	-0.556748	-0.556748	-0.556748	1.46827	-0.556748	-0.556748	-0.556748	-0.556748	-0.556748	-0.0696906	-0.556748	-0.00833934	-0.556748	-0.101101	-0.556748	1.12163	-0.556748	-0.556748	-0.556748	2	0.261798	-0.556748	-0.556748	-0.556748	-0.556748	-0.1422	-0.556748	-0.556748	-0.556748	-0.556748	-0.556748	2	-0.556748	-0.556748	-0.556748	-0.556748	-0.556748	-0.556748	0.88399
HGD--chr3---	0.791688	0.482023	-0.650305	1.13624	0.181949	0.403349	-0.650305	0.254461	-0.650305	-0.650305	1.07738	-0.650305	-0.650305	0.645767	2	-0.650305	-0.650305	-0.650305	1.23716	-0.133711	0.227793	0.403647	-0.650305	1.63847	-0.650305	1.52308	0.386711	0.519774	-0.650305	2	1.37527	0.710133	-0.650305	0.725085	-0.650305	0.163645	-0.650305	0.404301	1.31837	-0.650305	-0.650305	1.21421	0.0031883	2	0.222526	-0.650305	2	0.26958	1.82237
HIGD2A--chr5--+	-0.596719	-0.596719	-0.596719	1.10249	-0.596719	-0.596719	1.20522	0.895739	-0.596719	0.538827	2	2	-0.596719	0.635996	-0.596719	-0.596719	-0.596719	-0.596719	1.19848	-0.596719	0.238454	0.78388	2	0.580525	0.427234	-0.596719	-0.596719	-0.596719	-0.596719	2	1.32984	1.53296	-0.596719	-0.596719	-0.596719	0.177442	-0.596719	-0.596719	0.200625	-0.596719	-0.596719	-0.596719	0.0248287	-0.596719	-0.596719	-0.596719	-0.596719	0.917798	-0.596719
HINT1--chr5---	0.909611	-1.52544	1.94018	0.912119	-0.198446	0.634476	1.35444	-0.111946	1.14032	0.80832	0.980669	0.388938	-1.52544	-0.324972	-1.52544	-0.102889	-1.52544	-1.52544	0.350235	0.945423	0.239705	1.04306	1.67259	0.413045	0.304056	1.31328	0.613041	-0.871454	1.19377	1.14099	0.655041	1.76044	-0.630167	1.01756	-0.452832	-0.220739	2	0.278242	1.02893	0.0134144	0.608426	0.845528	0.781886	1.00864	0.232546	-1.52544	1.8339	0.600893	0.239738
HINT2--chr9---	1.92583	-0.545609	2	0.555276	-0.545609	-0.545609	0.631817	-0.545609	-0.545609	1.55545	1.26866	2	-0.545609	-0.545609	-0.545609	-0.545609	-0.545609	-0.545609	0.626761	0.831359	-0.545609	0.561164	2	0.754174	-0.545609	1.32376	1.3127	-0.545609	-0.545609	2	0.366086	2	-0.545609	0.898711	-0.545609	0.651271	2	-0.545609	-0.545609	-0.545609	1.52034	1.41235	-0.545609	2	-0.545609	-0.545609	-0.545609	-0.545609	-0.545609
HIST1H1C--chr6---	-0.590372	-0.590372	1.77618	1.72434	1.01511	-0.590372	1.84107	0.151867	0.630599	-0.590372	1.66004	2	-0.590372	2	-0.590372	-0.590372	-0.590372	-0.590372	-0.590372	-0.166576	-0.590372	-0.113193	-0.590372	0.138637	0.292818	1.1926	0.26036	-0.590372	-0.590372	2	0.650622	2	-0.590372	-0.590372	0.343132	0.0773646	1.95168	-0.590372	0.61256	0.616359	0.0967972	0.93921	-0.0542685	-0.590372	0.656523	-0.590372	-0.590372	-0.590372	-0.590372
HIST1H4C--chr6--+	1.65577	-0.486498	-0.486498	1.1397	-0.486498	-0.486498	0.534106	0.337066	-0.486498	-0.486498	1.08612	-0.486498	-0.486498	-0.486498	-0.486498	1.83023	-0.486498	-0.486498	-0.486498	0.373789	-0.486498	-0.486498	-0.486498	-0.0465932	-0.486498	-0.486498	-0.486498	1.30315	-0.486498	-0.486498	0.303768	0.751841	-0.486498	-0.486498	-0.486498	-0.486498	-0.486498	-0.486498	-0.486498	-0.486498	-0.486498	-0.486498	0.108345	-0.486498	-0.486498	-0.486498	-0.486498	-0.486498	-0.486498
HIST2H2AA3--chr1---	-0.203049	-0.651877	1.63654	0.322736	-0.651877	-0.651877	-0.651877	0.20415	-0.651877	-0.651877	-0.651877	2	-0.651877	1.896	-0.651877	-0.651877	-0.651877	-0.651877	0.377791	0.0634512	-0.651877	0.327298	1.40765	-0.167098	0.345659	-0.651877	-0.651877	-0.0135629	0.841922	1.19051	-0.651877	1.96864	-0.651877	-0.651877	-0.651877	0.268465	-0.651877	-0.651877	-0.194545	-0.192924	-0.19492	-0.651877	-0.295377	-0.651877	0.177289	-0.651877	0.845286	-0.150052	-0.651877
HLA-A--chr6--+	-0.384129	-1.10996	0.342086	-0.210701	-1.10996	-1.10996	-0.545584	-0.654542	-0.360808	-1.10996	-1.10996	-1.10996	-1.10996	-0.0288534	-1.10996	-1.10996	-1.10996	-1.10996	-0.548007	-1.10996	-1.10996	-0.817175	-1.10996	-0.866698	-0.56806	-1.10996	-1.10996	-0.520997	-1.10996	-1.10996	-0.672956	-1.10996	-1.10996	-1.10996	-1.10996	-1.10996	-1.10996	-1.10996	-0.687986	-1.10996	-1.10996	-0.171455	-1.10996	-1.10996	-1.10996	-1.10996	-1.10996	-0.308443	-0.340784
HLA-A-HLA-H--chr6--+	-0.635984	-0.635984	-0.635984	-0.635984	-0.635984	-0.635984	-0.635984	0.0840893	1.28827	-0.635984	-0.635984	-0.635984	-0.635984	0.395517	-0.635984	-0.635984	-0.635984	-0.635984	-0.635984	0.116197	-0.635984	-0.635984	1.383	-0.251359	-0.635984	-0.635984	0.189342	-0.635984	-0.635984	-0.635984	0.0549752	0.446743	-0.635984	-0.635984	-0.635984	-0.286051	-0.635984	-0.635984	0.0312108	-0.635984	-0.635984	-0.635984	-0.635984	-0.635984	-0.635984	-0.635984	-0.635984	-0.635984	-0.635984
HLA-B--chr6---	-0.814031	-0.673238	-1.18819	-0.375721	-1.18819	-1.18819	-0.678284	-0.474577	-0.088639	-1.18819	0.0593305	-1.18819	-1.18819	0.0775749	-1.18819	-1.18819	-1.18819	-1.18819	-1.18819	-0.317518	-0.493266	-0.923664	-0.0345099	-0.485867	-0.69859	-1.18819	-1.18819	-1.18819	-1.18819	0.347679	-0.500241	-0.169891	-1.18819	-0.562701	-1.18819	-0.669859	-1.18819	-1.18819	-1.18819	-0.519235	-1.18819	0.141777	-0.890998	-1.18819	-0.49697	-1.18819	-1.18819	-0.46403	-1.18819
HLA-C--chr6---	-0.139657	-0.751726	-1.31927	-0.137997	-0.589062	-0.791159	-1.31927	-0.865784	-1.31927	-1.31927	-1.31927	-1.31927	-1.31927	0.329932	-1.31927	-1.31927	-1.31927	-1.31927	-1.31927	-0.845563	-1.31927	-1.31927	0.98735	-0.284655	-0.779668	-0.427025	-1.31927	-1.31927	0.0531893	0.373457	0.0920401	-0.637394	-0.51643	-0.6299	-1.31927	-0.603413	-1.31927	-1.31927	-0.584315	-0.581995	-0.584853	-1.31927	-1.31927	0.270961	-0.557456	-1.31927	0.69915	-0.255343	-1.31927
HLA-C-HLA-B--chr6---	-0.530645	-0.530645	-0.530645	-0.530645	-0.530645	-0.530645	-0.530645	-0.530645	-0.530645	-0.530645	-0.530645	-0.530645	-0.530645	-0.530645	-0.530645	-0.530645	-0.530645	-0.530645	-0.530645	-0.0456416	-0.530645	-0.530645	-0.530645	-0.530645	-0.530645	-0.530645	-0.530645	-0.530645	-0.530645	-0.530645	-0.530645	-0.530645	-0.530645	-0.530645	-0.530645	-0.530645	-0.530645	-0.530645	-0.530645	-0.530645	-0.530645	-0.530645	-0.530645	-0.530645	-0.530645	-0.530645	-0.530645	-0.530645	-0.530645
HLA-DMA--chr6---	-0.394563	-0.394563	-0.394563	-0.394563	-0.394563	-0.394563	-0.394563	-0.394563	-0.394563	-0.394563	-0.394563	-0.394563	-0.394563	-0.394563	-0.394563	-0.394563	-0.394563	-0.394563	-0.394563	0.121369	-0.394563	0.186357	-0.394563	0.0880961	-0.394563	-0.394563	-0.394563	-0.394563	-0.394563	-0.394563	-0.394563	-0.394563	-0.394563	-0.394563	-0.394563	-0.394563	-0.394563	-0.394563	-0.394563	-0.394563	-0.394563	-0.394563	-0.394563	-0.394563	-0.394563	-0.394563	-0.394563	-0.394563	-0.394563
HLA-DPA1--chr6---	-0.404963	-0.813696	0.619445	-0.813696	-0.813696	-0.290244	-0.813696	-0.813696	-0.813696	-0.220565	-0.813696	-0.813696	-0.813696	-0.16981	1.07317	-0.813696	-0.813696	-0.813696	-0.259062	-0.813696	-0.813696	-0.524726	-0.813696	-0.573605	-0.813696	-0.813696	-0.813696	-0.813696	-0.813696	-0.813696	-0.813696	-0.813696	-0.813696	-0.813696	-0.248384	-0.813696	0.725721	-0.813696	-0.813696	-0.395742	-0.813696	-0.813696	-0.813696	-0.813696	-0.813696	-0.813696	-0.813696	-0.813696	-0.0545359
HLA-DPB1--chr6--+	-0.806754	-0.806754	-0.806754	-0.806754	-0.806754	-0.806754	0.0905568	-0.806754	-0.806754	-0.806754	-0.806754	-0.806754	-0.806754	0.21051	-0.806754	-0.806754	-0.806754	-0.806754	-0.806754	-0.806754	-0.390863	-0.307573	-0.806754	-0.806754	-0.806754	-0.806754	-0.806754	-0.806754	-0.806754	-0.806754	-0.806754	-0.806754	-0.806754	-0.806754	-0.806754	-0.266933	-0.806754	-0.307264	-0.806754	-0.806754	-0.806754	-0.806754	-0.251677	-0.806754	-0.806754	-0.806754	-0.806754	-0.806754	-0.806754
HLA-DQA1--chr6--+	-0.553592	-0.553592	-0.553592	-0.553592	-0.553592	-0.553592	-0.553592	-0.553592	-0.553592	-0.553592	-0.553592	-0.553592	-0.553592	-0.553592	-0.553592	-0.553592	-0.553592	-0.553592	-0.553592	-0.553592	-0.553592	-0.553592	-0.553592	-0.553592	-0.553592	-0.553592	-0.553592	-0.553592	-0.553592	-0.553592	-0.553592	-0.553592	-0.553592	-0.553592	-0.553592	-0.212679	-0.553592	-0.553592	-0.553592	-0.553592	-0.553592	0.892062	-0.553592	-0.553592	-0.553592	-0.553592	-0.553592	-0.553592	-0.553592
HLA-DQB1--chr6---	-0.442194	-0.442194	-0.442194	-0.442194	-0.442194	-0.442194	-0.442194	-0.442194	-0.442194	-0.442194	-0.442194	-0.442194	-0.442194	-0.442194	-0.442194	-0.442194	-0.442194	-0.442194	-0.442194	-0.442194	-0.442194	-0.442194	-0.442194	-0.442194	-0.442194	-0.442194	-0.442194	-0.442194	-0.442194	-0.442194	-0.442194	-0.442194	-0.442194	-0.442194	-0.442194	-0.442194	-0.442194	-0.442194	-0.442194	-0.442194	-0.442194	-0.442194	-0.442194	-0.442194	-0.442194	-0.442194	-0.442194	-0.442194	-0.442194
HLA-DRA--chr6--+	-0.954831	-0.954831	-0.954831	-0.954831	-0.954831	-0.954831	-0.485583	-0.576177	-0.954831	-0.954831	-0.954831	-0.954831	-0.954831	-0.954831	-0.954831	-0.954831	-0.954831	-0.954831	-0.487598	-0.954831	-0.954831	-0.954831	0.106861	-0.752574	-0.954831	-0.954831	-0.214227	-0.954831	-0.954831	-0.954831	-0.591486	-0.0177257	-0.954831	-0.379216	-0.478603	-0.770817	-0.954831	-0.513467	-0.603983	-0.60274	-0.954831	-0.954831	-0.681337	-0.954831	-0.954831	-0.954831	-0.954831	-0.954831	-0.315302
HLA-DRB1--chr6---	-0.851231	-0.373421	-0.851231	-0.851231	-0.851231	-0.851231	0.197573	-0.851231	-0.851231	-0.851231	-0.851231	-0.851231	-0.851231	-0.851231	-0.851231	-0.851231	-0.851231	-0.851231	-0.851231	-0.851231	-0.851231	-0.851231	-0.851231	-0.476251	-0.851231	-0.851231	-0.851231	-0.851231	-0.851231	-0.851231	-0.851231	-0.277165	-0.851231	-0.851231	-0.851231	-0.665695	-0.851231	-0.851231	-0.851231	-0.851231	-0.851231	-0.0644595	-0.175326	-0.851231	-0.482921	-0.851231	-0.851231	-0.463066	-0.851231
HLA-DRB1-HLA-DRB5--chr6---	-0.541211	-0.541211	-0.541211	-0.541211	-0.541211	-0.541211	-0.541211	-0.541211	-0.541211	-0.541211	-0.541211	-0.541211	-0.541211	-0.541211	-0.541211	-0.541211	-0.541211	-0.541211	-0.541211	-0.541211	-0.541211	-0.541211	-0.541211	-0.213286	-0.541211	-0.541211	-0.541211	-0.541211	-0.541211	-0.541211	-0.541211	-0.541211	-0.541211	-0.541211	-0.541211	-0.541211	-0.541211	0.174382	-0.541211	-0.541211	-0.541211	-0.541211	-0.541211	-0.541211	-0.541211	-0.541211	-0.541211	-0.541211	-0.541211
HLA-DRB5--chr6---	-0.495212	-0.495212	-0.495212	-0.495212	-0.495212	0.319446	-0.495212	-0.495212	-0.495212	-0.495212	-0.495212	-0.495212	-0.495212	0.506878	-0.495212	-0.495212	-0.495212	-0.495212	-0.495212	-0.0957949	0.183711	-0.495212	-0.495212	-0.495212	-0.495212	-0.495212	-0.495212	-0.495212	-0.495212	-0.495212	-0.495212	0.556643	-0.495212	-0.495212	-0.495212	-0.495212	-0.495212	-0.495212	-0.495212	-0.495212	-0.495212	-0.495212	0.0100521	-0.495212	-0.495212	-0.495212	-0.495212	0.216019	-0.495212
HLA-E--chr6--+	-0.888577	-0.888577	-0.888577	-0.888577	-0.0511029	-0.888577	-0.888577	-0.888577	-0.888577	-0.888577	-0.888577	-0.888577	-0.888577	0.346087	-0.888577	-0.888577	-0.888577	-0.888577	-0.246808	-0.888577	-0.010172	-0.888577	-0.888577	-0.888577	-0.888577	-0.888577	-0.888577	-0.215961	-0.888577	-0.888577	-0.888577	-0.888577	-0.888577	-0.0979395	-0.888577	-0.233391	-0.888577	-0.888577	-0.888577	-0.404961	-0.888577	0.18323	-0.888577	-0.888577	-0.386833	-0.888577	0.689041	-0.888577	-0.0101502
HLA-F--chr6--+	0.0696705	0.322925	-0.603351	0.254225	-0.603351	-0.603351	-0.603351	-0.603351	-0.603351	-0.603351	-0.603351	-0.603351	-0.603351	-0.603351	-0.603351	-0.603351	-0.603351	-0.603351	-0.603351	-0.180763	-0.603351	-0.603351	-0.603351	-0.208015	-0.603351	0.00336947	-0.603351	-0.603351	-0.603351	-0.603351	-0.603351	0.509525	-0.603351	-0.603351	-0.603351	-0.603351	1.93146	-0.603351	-0.603351	-0.603351	-0.603351	-0.603351	-0.603351	-0.603351	-0.603351	-0.603351	-0.603351	0.149141	-0.603351
HMGB1--chr13---	-0.632383	-0.444462	-1.13178	0.298794	-0.626606	-1.13178	-0.451196	-0.179303	-0.228372	-1.13178	-0.0830839	-1.13178	-1.13178	-0.345069	-1.13178	-1.13178	-1.13178	-1.13178	0.0139029	0.185065	-0.598779	-0.778713	-1.13178	-0.0284724	-0.4783	0.575753	-1.13178	-0.421547	-1.13178	2	-0.213557	0.622105	-1.13178	0.95169	-0.441072	-0.107741	0.749111	-1.13178	0.0631984	-0.621118	-0.24237	-2.75294e-05	0.0633139	-1.13178	-0.601976	-1.13178	-1.13178	-1.13178	-1.13178
HMGB2--chr4---	0.37277	-0.462723	-0.462723	-0.462723	0.382436	-0.462723	0.675896	-0.462723	-0.462723	-0.462723	-0.462723	-0.462723	-0.462723	-0.462723	-0.462723	-0.462723	-0.462723	-0.462723	-0.462723	-0.462723	-0.462723	-0.462723	-0.462723	-0.462723	-0.462723	0.290464	-0.462723	-0.462723	-0.462723	-0.462723	-0.462723	-0.462723	-0.462723	-0.462723	-0.462723	-0.462723	-0.462723	-0.462723	-0.462723	-0.462723	-0.462723	-0.462723	-0.462723	-0.462723	-0.462723	-0.462723	-0.462723	-0.462723	-0.462723
HMGCS2--chr1---	1.47747	-0.577893	-0.577893	0.533525	0.304433	-0.577893	0.610799	1.08568	0.999976	1.54327	1.25373	-0.577893	-0.577893	-0.577893	-0.577893	-0.577893	-0.577893	-0.577893	0.605694	0.81225	1.04211	2	-0.577893	1.34912	-0.577893	0.208417	-0.577893	-0.577893	-0.577893	-0.577893	2	1.79597	1.12026	2	2	1.89686	2	0.540163	0.976665	0.981574	1.50783	-0.577893	1.50943	-0.577893	1.57888	-0.577893	-0.577893	1.11027	1.04215
HMGN2--chr1--+	-0.541012	-0.541012	-0.541012	-0.541012	-0.541012	-0.541012	0.627371	-0.541012	-0.541012	0.703102	-0.541012	-0.541012	-0.541012	0.809562	-0.541012	-0.541012	-0.541012	-0.541012	-0.541012	-0.00269472	-0.541012	-0.541012	-0.541012	-0.541012	0.58084	0.231863	0.539612	-0.541012	-0.541012	-0.541012	1.03533	-0.541012	-0.541012	-0.541012	1.45874	-0.0828349	2	-0.541012	0.332566	-0.541012	0.331849	1.4019	0.139961	-0.541012	-0.541012	-0.541012	-0.541012	-0.541012	-0.541012
HMGN3--chr6---	0.0790481	-0.667356	-0.667356	0.953433	-0.667356	0.288541	-0.667356	-0.667356	-0.667356	-0.667356	0.900032	-0.667356	-0.667356	-0.667356	-0.667356	-0.667356	-0.667356	-0.667356	-0.667356	0.52224	-0.667356	-0.667356	1.63411	-0.667356	0.309341	-0.667356	-0.667356	-0.667356	-0.667356	-0.667356	0.12028	0.566862	-0.667356	-0.667356	-0.667356	-0.268462	-0.667356	-0.667356	0.662936	-0.667356	0.661963	-0.667356	0.39588	-0.667356	-0.667356	-0.667356	-0.667356	0.777265	0.718976
HNRNPA1--chr12--+	-0.575152	-0.575152	-0.575152	-0.575152	-0.575152	-0.575152	-0.575152	0.318347	-0.575152	0.603889	1.13101	-0.575152	-0.575152	-0.575152	-0.575152	-0.575152	-0.575152	-0.575152	-0.575152	0.719771	-0.575152	-0.575152	-0.575152	-0.575152	0.488021	0.157298	-0.575152	0.580356	-0.575152	-0.575152	0.282221	-0.575152	-0.575152	-0.575152	-0.575152	0.550413	-0.575152	-0.575152	-0.575152	0.255667	-0.575152	-0.575152	-0.575152	-0.575152	0.286809	-0.575152	-0.575152	-0.575152	0.933925
HNRNPA2B1--chr7---	-0.984922	-0.984922	-0.984922	0.194594	-0.0230652	-0.984922	-0.984922	-0.984922	-0.00229574	0.336043	0.155732	-0.984922	-0.984922	-0.129225	-0.984922	-0.984922	-0.984922	1.52417	-0.984922	-0.643855	-0.405181	-0.289078	-0.984922	-0.16773	-0.984922	0.674531	-0.984922	-0.984922	-0.984922	-0.984922	0.0138192	-0.0867297	-0.984922	-0.076858	-0.984922	-0.232427	-0.984922	-0.984922	-0.984922	-0.0137558	-0.431894	-0.984922	-0.211161	-0.984922	0.0185678	-0.984922	-0.984922	-0.377593	-0.984922
HNRNPA3--chr2--+	0.665075	-0.620213	-0.620213	-0.620213	0.678332	-0.620213	0.379173	-0.620213	-0.620213	-0.620213	-0.620213	-0.620213	-0.620213	-0.620213	-0.620213	-0.620213	-0.620213	-0.620213	-0.620213	-0.620213	-0.620213	0.6736	-0.620213	-0.620213	-0.620213	0.0408726	-0.620213	0.422711	-0.620213	-0.620213	-0.620213	-0.620213	-0.620213	0.60571	-0.620213	-0.620213	-0.620213	-0.620213	0.127009	1.13959	-0.620213	-0.620213	-0.620213	-0.620213	0.157765	-0.620213	-0.620213	-0.620213	-0.620213
HNRNPC--chr14---	-0.51715	-0.51715	-0.51715	-0.51715	-0.51715	0.660833	1.60095	0.494377	1.14679	-0.51715	-0.51715	-0.51715	-0.51715	0.931857	-0.51715	-0.51715	-0.51715	-0.51715	-0.51715	0.0604012	-0.51715	-0.51715	-0.51715	0.023155	0.686466	-0.51715	0.642232	-0.51715	-0.51715	-0.51715	0.453479	-0.51715	-0.51715	-0.51715	-0.51715	-0.0255799	-0.51715	-0.51715	0.420096	-0.51715	-0.51715	-0.51715	-0.51715	-0.51715	0.458674	-0.51715	-0.51715	-0.51715	-0.51715
HNRNPDL--chr4---	-0.597646	-0.597646	-0.597646	-0.597646	-0.597646	0.322767	1.57353	0.192708	-0.597646	-0.597646	-0.597646	-0.597646	1.3193	-0.597646	-0.597646	-0.597646	-0.597646	-0.597646	-0.597646	-0.146378	-0.597646	-0.597646	-0.597646	-0.597646	0.342795	-0.597646	-0.597646	-0.597646	-0.597646	-0.597646	0.160752	-0.597646	-0.597646	1.37675	-0.597646	-0.213559	-0.597646	-0.597646	-0.597646	-0.597646	-0.597646	-0.597646	-0.597646	-0.597646	0.730076	-0.597646	-0.597646	-0.597646	0.737223
HNRNPK--chr9---	-0.589379	-0.589379	-0.589379	0.524364	-0.589379	-0.589379	0.601799	0.371828	1.97926	-0.589379	1.24608	-0.589379	-0.589379	-0.589379	-0.589379	-0.589379	-0.589379	-0.589379	-0.589379	-0.589379	-0.589379	0.0285721	-0.589379	0.725585	0.554361	0.806617	0.512328	-0.589379	-0.589379	-0.589379	-0.589379	0.855925	1.11232	-0.589379	-0.589379	-0.122263	-0.589379	0.531015	-0.589379	-0.589379	-0.589379	-0.589379	-0.589379	-0.589379	-0.589379	-0.589379	-0.589379	1.10231	-0.589379
HNRNPU--chr1---	0.388772	-0.506665	-0.506665	-0.506665	-0.506665	-0.506665	-0.506665	-0.506665	-0.506665	-0.506665	-0.506665	-0.506665	-0.506665	-0.506665	-0.506665	-0.506665	-0.506665	-0.506665	-0.506665	-0.506665	-0.506665	-0.506665	-0.506665	0.460498	-0.506665	0.300561	-0.506665	-0.506665	2	-0.506665	-0.506665	-0.506665	-0.506665	-0.506665	0.731799	-0.506665	-0.506665	0.641131	-0.506665	0.408972	-0.506665	-0.506665	0.204574	-0.506665	-0.506665	-0.506665	-0.506665	-0.506665	-0.506665
HP--chr16--+	1.99811	1.19178	2	1.13765	0.991094	1.16162	0.713265	0.933021	1.19756	0.905513	1.1147	2	1.12652	0.466579	-0.0184531	1.50978	0.840848	2	1.78933	1.61371	1.16294	0.921902	2	1.79374	1.007	1.30727	0.673346	0.130945	2	1.83444	0.969619	2	-0.673511	0.956715	0.821838	1.47285	1.92446	0.801774	1.09069	1.30244	1.68539	0.796507	0.785447	1.86736	1.35464	-0.71805	1.84839	0.66916	1.16298
HPD--chr12---	1.11922	0.247958	0.859197	2	1.43546	-0.290042	1.16108	0.868412	0.991382	1.66926	2	1.19833	0.425943	-0.137895	-0.951338	2	-0.951338	2	1.15487	0.0722453	0.60053	0.534121	2	1.66499	-0.275653	0.814212	0.159311	-0.216971	1.57146	1.16828	1.49714	1.68494	0.0539722	1.20292	0.253103	0.836661	2	1.07403	1.30252	1.14956	1.14361	-0.951338	1.54582	-0.951338	1.35999	-0.951338	-0.951338	1.43634	1.36869
HPX--chr11---	2	1.39142	1.74553	0.495981	0.996029	0.824114	0.747396	1.86437	1.11615	0.824812	0.258613	2	1.26508	0.534603	-1.12493	1.20169	-1.12493	1.98544	1.64002	1.59665	1.2385	0.501963	1.76087	1.91576	0.850499	1.31503	0.65441	0.622668	1.3288	1.73113	0.726298	2	-1.12493	0.0150284	1.05715	1.55652	2	-0.219165	1.33402	1.33855	1.40347	0.725237	0.525822	2	0.955737	0.238011	2	0.166526	0.12218
HRG--chr3--+	0.916746	-0.18166	1.03876	2	1.67818	1.00205	1.09384	1.27388	0.0662607	1.93761	1.83322	-0.970229	-0.970229	-0.0676264	-0.970229	-0.970229	-0.970229	1.6764	0.754836	0.363072	0.0939396	0.0406552	1.65893	1.13871	0.303206	0.98884	0.656974	1.44284	1.82909	2	-0.365613	1.70006	-0.970229	2	-0.177771	1.71658	-0.970229	1.00336	0.942316	0.696823	0.691314	0.328243	1.30912	1.23931	1.2202	-0.970229	1.83425	2	0.093966
HRSP12--chr8---	0.851115	0.154821	-0.822904	0.719712	0.435049	0.0868889	1.73628	-0.04167	-0.822904	0.207995	1.54573	-0.822904	-0.822904	-0.822904	-0.822904	-0.822904	-0.822904	2	0.806853	-0.00683474	-0.0646972	0.987817	1.36756	0.24585	0.755994	2	1.93134	0.187419	-0.822904	2	1.60841	1.11052	0.560175	1.12872	0.834134	0.410326	2	-0.822904	0.443226	-0.0964744	0.875839	2	1.61966	-0.822904	0.933706	-0.822904	-0.822904	1.38808	1.31216
HSBP1--chr16--+	-0.55322	-0.55322	2	1.93598	-0.55322	-0.55322	0.631001	0.402373	-0.55322	-0.55322	-0.55322	-0.55322	-0.55322	-0.55322	-0.55322	-0.55322	-0.55322	-0.55322	-0.55322	-0.55322	1.06069	-0.55322	-0.55322	0.38534	-0.55322	-0.55322	-0.55322	-0.55322	-0.55322	-0.55322	-0.55322	0.883643	-0.55322	0.899435	-0.55322	-0.0888321	-0.55322	0.560631	-0.55322	-0.55322	-0.55322	1.41603	0.136985	-0.55322	0.368644	-0.55322	-0.55322	-0.55322	-0.55322
HSD17B6--chr12--+	-0.662839	-0.662839	2	1.09165	0.154485	0.371913	0.438281	1.39406	-0.662839	-0.662839	-0.662839	2	-0.662839	0.609983	-0.662839	-0.662839	2	2	1.76979	0.265316	1.34482	1.09987	1.82848	1.36433	0.394429	1.47156	-0.662839	0.48625	-0.662839	-0.662839	-0.662839	2	-0.662839	-0.662839	-0.662839	1.4353	-0.662839	0.372848	1.27052	0.78174	0.159772	-0.662839	1.58532	2	1.33504	-0.662839	-0.662839	-0.662839	-0.662839
HSP90AA1--chr14---	-0.810145	-0.915848	-1.30236	-0.944515	-0.805068	-0.942703	-0.655667	-0.993525	-0.245772	-0.619403	-0.365991	-1.30236	-1.30236	1.51882	-1.30236	-1.30236	-1.30236	-0.00512165	-0.293833	-0.482815	-0.780763	-1.10381	-0.436426	-1.30236	-0.678192	-0.853826	-1.30236	-1.30236	-1.30236	-1.30236	-0.785998	-0.316064	-1.30236	-1.30236	-1.30236	-0.814842	-1.30236	-0.942378	-1.0162	-1.01519	-1.01644	1.10098	-0.755603	-0.219363	-1.00443	-1.30236	-1.30236	-0.428315	-1.30236
HSP90AB1--chr6--+	-1.00082	-1.00082	-1.00082	-1.00082	-0.601897	0.133396	-1.00082	-1.00082	-1.00082	-1.00082	-1.00082	-1.00082	0.0510342	-1.00082	-1.00082	-1.00082	-1.00082	-1.00082	-0.46569	-0.7532	-0.579923	-0.495632	-1.00082	-0.407533	-1.00082	-0.645308	-0.50375	-0.0584138	-1.00082	-1.00082	-0.275727	-1.00082	-1.00082	-1.00082	-0.455388	0.118072	0.484455	-0.495318	-0.598987	-0.597563	-1.00082	-0.107111	-0.233046	-1.00082	-1.00082	-1.00082	-1.00082	-1.00082	0.184394
HSP90B1--chr12--+	1.33985	0.774369	1.04488	-0.262635	0.384343	0.675724	-0.210739	0.108186	0.0506277	-0.158995	1.45805	-1.00905	-1.00905	-1.00905	-1.00905	-1.00905	-1.00905	-1.00905	-0.214167	0.152136	0.75144	0.484031	-1.00905	-0.127779	-0.242532	0.993848	0.250906	-0.175961	-1.00905	-1.00905	-1.00905	0.585206	-1.00905	-0.0297814	0.357306	1.01931	-1.00905	0.269605	0.392633	-0.410053	-0.412658	1.60281	0.620863	1.24992	0.439412	-1.00905	-1.00905	-0.354098	0.0789529
HSPA1A--chr6--+	-1.0774	-1.35268	-0.387484	-0.754929	-0.865234	-1.00014	-0.977531	-0.82766	-0.317016	-1.35268	-0.434854	-1.35268	-1.35268	0.566986	-1.35268	-1.35268	-1.35268	-1.35268	-0.979142	-1.17983	-0.668677	-1.35268	-1.35268	-0.835966	-1.35268	-1.10452	-1.35268	-0.961188	-1.35268	-1.35268	-0.846542	-1.35268	-1.35268	-1.35268	-0.971951	-0.510281	-1.35268	-0.751805	-1.07219	-1.07119	-1.07242	0.0666333	-1.35268	-1.35268	-0.844135	-0.44852	-1.35268	-1.35268	-0.841397
HSPA1B--chr6--+	-0.934049	-0.934049	-0.934049	-0.934049	-0.934049	-0.934049	-0.934049	-0.934049	-0.934049	-0.934049	-0.934049	-0.934049	-0.934049	0.752579	-0.934049	-0.934049	1.26072	-0.934049	-0.934049	-0.934049	-0.934049	-0.934049	-0.934049	-0.934049	-0.934049	-0.934049	-0.934049	-0.934049	-0.934049	0.600321	-0.934049	-0.934049	-0.934049	-0.934049	-0.934049	-0.416225	-0.934049	-0.934049	-0.934049	-0.934049	-0.934049	0.39462	-0.934049	-0.934049	-0.934049	-0.934049	-0.934049	-0.934049	0.189354
HSPA5--chr9---	-0.767772	0.0377133	-0.767772	-0.767772	0.268575	-0.0182518	0.0298214	-0.767772	0.952144	-0.767772	-0.767772	-0.767772	-0.767772	-0.767772	-0.767772	-0.767772	-0.767772	1.93564	0.0263962	-0.767772	0.319225	-0.767772	-0.767772	0.700606	0.532981	0.778274	-0.767772	0.0645681	-0.767772	1.63463	-0.767772	-0.767772	0.371658	-0.767772	-0.767772	0.0429993	-0.767772	-0.0175743	-0.767772	-0.169313	-0.767772	0.558555	-0.302907	-0.767772	0.313432	-0.767772	-0.767772	-0.767772	0.319252
HSPA6--chr1--+	-0.531049	-0.531049	-0.531049	-0.531049	-0.531049	-0.531049	-0.531049	-0.531049	-0.531049	-0.531049	-0.531049	1.92659	-0.531049	-0.531049	-0.531049	-0.531049	-0.531049	-0.531049	-0.531049	-0.531049	-0.531049	-0.531049	-0.531049	-0.531049	0.241437	-0.531049	-0.531049	-0.531049	-0.531049	-0.531049	-0.531049	-0.531049	-0.531049	-0.531049	-0.531049	-0.531049	-0.531049	0.225669	-0.531049	-0.531049	-0.531049	-0.531049	-0.531049	-0.531049	-0.531049	-0.531049	-0.531049	-0.531049	-0.531049
HSPA8--chr11---	-0.54844	-1.04594	-1.04594	-0.412016	-1.04594	-0.408806	0.457013	-1.04594	-1.04594	-0.323994	1.04935	-1.04594	-1.04594	0.943737	-1.04594	-1.04594	-1.04594	-1.04594	0.095393	-0.733562	-0.514963	0.790399	-1.04594	-0.753708	-0.394942	-0.59745	-1.04594	-1.04594	-1.04594	-1.04594	-0.520958	0.308052	-0.0773579	-0.214254	-0.357855	-0.780067	-1.04594	-0.40823	-0.159259	-1.04594	-0.159907	1.1723	-0.65078	-1.04594	-1.04594	-1.04594	-1.04594	-1.04594	-1.04594
HSPB1--chr7--+	0.068268	-0.587563	-0.587563	-0.587563	0.0758549	-0.587563	-0.587563	-0.587563	-0.587563	-0.587563	-0.587563	-0.587563	-0.587563	-0.587563	-0.587563	-0.587563	-0.587563	-0.587563	-0.587563	-0.587563	-0.587563	-0.587563	-0.587563	0.120801	-0.587563	-0.587563	-0.587563	-0.587563	-0.587563	-0.587563	-0.587563	0.496887	-0.587563	-0.587563	-0.587563	-0.237073	-0.587563	-0.587563	-0.587563	-0.587563	-0.587563	0.898702	-0.587563	-0.587563	-0.587563	-0.587563	-0.587563	-0.587563	-0.587563
HSPD1--chr2---	-0.0208612	-0.197926	-0.845383	-0.245946	-0.0123568	0.180677	-0.204269	-0.845383	0.00563083	-0.845383	-0.845383	-0.845383	-0.845383	0.382723	1.32632	0.609919	-0.845383	-0.845383	-0.845383	-0.304975	-0.845383	-0.24274	-0.845383	0.334914	-0.845383	0.763117	-0.845383	-0.845383	-0.845383	-0.845383	-0.348961	0.434943	-0.845383	0.820739	-0.194733	-0.379972	0.926421	0.508607	-0.845383	-0.0042943	-0.366427	-0.845383	-0.47172	-0.845383	0.0236999	-0.845383	-0.845383	-0.845383	-0.845383
HSPE1--chr2--+	-0.0672086	-0.519813	-1.15535	1.00677	0.177206	-0.56397	0.733739	-0.647536	-1.15535	-0.485249	0.384308	-1.15535	-1.15535	-0.427908	0.976381	-1.15535	-1.15535	1.79232	0.234949	0.617824	-0.007934	0.309824	0.268492	0.00321955	0.195616	-0.156209	-0.573308	-0.498624	1.57526	1.52225	-1.15535	1.38159	-1.15535	0.113237	-0.0782467	-0.35373	0.583839	-1.15535	-1.15535	-0.329745	0.385141	-1.15535	0.289026	0.625405	-0.302266	-1.15535	-1.15535	-0.63905	-0.297674
HSPE1-MOB4--chr2--+	-0.379734	-0.379734	2	-0.379734	-0.379734	-0.379734	-0.379734	-0.379734	-0.379734	-0.379734	-0.379734	-0.379734	-0.379734	-0.379734	-0.379734	-0.379734	-0.379734	-0.379734	-0.379734	-0.379734	-0.379734	-0.379734	-0.379734	-0.379734	-0.379734	-0.379734	-0.379734	-0.379734	-0.379734	-0.379734	-0.379734	-0.379734	-0.379734	-0.379734	-0.379734	0.0396567	-0.379734	-0.379734	-0.379734	-0.379734	-0.379734	-0.379734	-0.379734	-0.379734	-0.379734	-0.379734	-0.379734	-0.379734	1.07783
HSPH1--chr13---	-0.59947	-0.59947	-0.59947	-0.59947	-0.59947	-0.59947	-0.59947	-0.59947	-0.59947	-0.59947	-0.59947	-0.59947	-0.59947	2	-0.59947	-0.59947	-0.59947	-0.59947	-0.59947	-0.59947	-0.59947	-0.59947	-0.59947	-0.59947	-0.59947	-0.59947	-0.59947	-0.59947	-0.59947	-0.59947	-0.59947	-0.59947	-0.59947	-0.59947	-0.59947	-0.59947	-0.59947	-0.59947	-0.59947	-0.59947	-0.59947	0.537116	-0.201108	-0.59947	-0.0674015	-0.59947	-0.59947	-0.59947	-0.59947
HYPK--chr15--+	0.168235	0.453399	-0.589585	1.05599	0.752331	-0.589585	1.15548	-0.589585	0.781307	0.510122	-0.589585	2	1.43171	1.38876	-0.589585	-0.589585	-0.589585	2	0.438745	0.280953	-0.589585	-0.0538145	1.74709	-0.589585	0.402051	0.0935805	-0.589585	-0.589585	-0.589585	2	1.66849	1.47288	-0.589585	-0.589585	-0.589585	0.160142	-0.589585	-0.589585	-0.589585	-0.589585	-0.589585	1.12781	-0.589585	-0.589585	0.214377	-0.589585	1.93829	0.257718	-0.589585
ID2--chr2--+	-0.103203	-0.666498	-0.666498	-0.666498	-0.0966869	-0.666498	-0.666498	-0.666498	-0.666498	0.150923	-0.666498	-0.666498	-0.666498	-0.666498	-0.666498	-0.666498	-0.666498	-0.666498	-0.666498	-0.312807	-0.666498	-0.666498	-0.666498	-0.335616	0.0705934	0.552301	0.043505	-0.666498	-0.666498	-0.666498	-0.666498	-0.666498	-0.666498	0.275176	-0.666498	-0.666498	-0.666498	-0.666498	-0.666498	-0.0904964	-0.666498	-0.666498	0.135902	-0.666498	0.726355	-0.666498	-0.666498	-0.666498	-0.666498
ID3--chr1---	-0.524794	-0.524794	-0.524794	-0.524794	-0.524794	-0.524794	-0.524794	-0.524794	-0.524794	0.327998	-0.524794	-0.524794	-0.524794	-0.524794	-0.524794	-0.524794	-0.524794	-0.524794	-0.524794	-0.524794	-0.524794	-0.524794	-0.524794	-0.179594	-0.524794	-0.524794	-0.524794	-0.524794	-0.524794	-0.524794	0.0953382	-0.524794	-0.524794	-0.524794	-0.524794	-0.524794	-0.524794	0.228496	-0.524794	-0.524794	-0.524794	-0.524794	-0.524794	-0.524794	-0.524794	-0.524794	-0.524794	0.132267	-0.524794
IER3--chr6---	-0.562495	-0.562495	-0.562495	-0.562495	-0.562495	0.177532	-0.562495	-0.562495	-0.562495	-0.562495	-0.562495	-0.562495	-0.562495	0.347794	-0.562495	-0.562495	-0.562495	-0.562495	-0.562495	-0.562495	-0.562495	-0.562495	-0.562495	-0.223067	0.193635	-0.562495	-0.562495	-0.562495	-0.562495	-0.562495	-0.562495	1.01015	-0.562495	-0.562495	-0.562495	-0.562495	-0.562495	0.178201	0.0262974	-0.562495	-0.562495	-0.562495	-0.562495	-0.562495	-0.562495	-0.562495	-0.562495	-0.562495	-0.562495
IFI16--chr1--+	-0.478559	-0.478559	-0.478559	-0.478559	-0.478559	-0.478559	-0.478559	-0.478559	-0.478559	-0.478559	-0.478559	-0.478559	-0.478559	-0.478559	-0.478559	-0.478559	-0.478559	-0.478559	-0.478559	-0.478559	0.479639	-0.478559	-0.478559	-0.478559	-0.478559	0.330785	-0.478559	-0.478559	-0.478559	-0.478559	-0.478559	1.00598	-0.478559	-0.478559	-0.478559	-0.478559	-0.478559	-0.478559	-0.478559	-0.478559	-0.478559	-0.478559	-0.478559	-0.478559	-0.478559	-0.478559	-0.478559	0.525238	1.18894
IFI27--chr14--+	-0.420715	0.378062	-0.420715	-0.420715	-0.420715	-0.420715	-0.420715	-0.420715	-0.420715	-0.420715	0.798041	-0.420715	-0.420715	0.493572	-0.420715	-0.420715	-0.420715	2	-0.420715	-0.420715	-0.420715	-0.0103911	-0.420715	-0.420715	0.869206	0.102492	-0.420715	-0.420715	2	-0.420715	-0.420715	-0.420715	-0.420715	-0.420715	-0.420715	-0.110546	-0.420715	-0.420715	-0.420715	-0.420715	-0.420715	-0.420715	-0.420715	1.81743	-0.420715	-0.420715	2	-0.420715	-0.420715
IFI30--chr19--+	-0.340877	-0.340877	-0.340877	-0.340877	-0.340877	-0.340877	-0.340877	-0.340877	-0.340877	-0.340877	-0.340877	-0.340877	-0.340877	-0.340877	-0.340877	-0.340877	-0.340877	-0.340877	-0.340877	-0.340877	-0.340877	0.26972	-0.340877	-0.340877	-0.340877	-0.340877	-0.340877	-0.340877	2	-0.340877	-0.340877	-0.340877	-0.340877	-0.340877	-0.340877	-0.340877	-0.340877	-0.340877	-0.340877	-0.340877	-0.340877	-0.340877	-0.340877	-0.340877	0.575368	-0.340877	-0.340877	-0.340877	-0.340877
IFITM1--chr11--+	-0.75545	-0.75545	-0.75545	-0.257688	-0.75545	-0.75545	-0.22308	-0.75545	0.392542	-0.75545	-0.75545	-0.75545	-0.75545	-0.140065	-0.75545	-0.75545	-0.75545	-0.75545	-0.75545	-0.132858	-0.75545	-0.479271	0.449056	-0.333518	-0.244282	-0.75545	-0.75545	-0.75545	-0.75545	-0.75545	-0.34323	-0.75545	-0.75545	-0.75545	-0.215161	0.0455777	0.715825	-0.75545	-0.75545	-0.355996	-0.75545	-0.75545	-0.75545	-0.75545	-0.75545	-0.75545	-0.75545	-0.75545	-0.75545
IFITM2--chr11--+	0.539666	-1.06376	1.41861	0.838067	-0.571263	-0.00186097	0.690147	0.843139	-1.06376	0.120236	-1.06376	-1.06376	-1.06376	-0.29679	-1.06376	0.442377	-1.06376	-1.06376	0.0531745	0.35703	-0.159502	-0.719553	-1.06376	0.988627	0.360616	0.222376	-0.450091	-0.371349	0.556643	-1.06376	-0.55	2	-1.06376	-0.249853	-1.06376	-0.218581	1.56801	-1.06376	0.101233	0.1046	-0.196668	-1.06376	-0.37023	0.813758	0.140112	-1.06376	0.560293	0.192372	0.399482
IFITM3--chr11---	0.786618	-0.00515125	1.744	-0.34511	0.102378	0.149727	1.248	0.469939	-0.486255	-0.24371	0.107662	-1.19067	-1.19067	-0.577247	-1.19067	0.600968	-1.19067	-1.19067	0.561446	0.450278	0.668385	-0.503657	1.28161	1.2213	0.358538	0.267471	-0.084796	-0.260123	-1.19067	2	0.755792	1.67191	-1.19067	0.188442	-1.19067	0.635328	-1.19067	-0.340691	-1.19067	0.621048	0.108365	0.193466	-0.258818	1.37119	0.147087	-1.19067	-1.19067	0.197774	-0.0203689
IGFBP1--chr7--+	1.5572	0.37521	-0.720792	1.56041	1.17345	0.29906	1.11298	0.798033	-0.720792	0.434816	0.951463	-0.720792	1.40325	-0.720792	-0.720792	-0.720792	-0.720792	2	1.67681	0.193998	2	1.30897	1.73466	0.477251	1.60898	-0.00289913	-0.720792	-0.720792	-0.720792	-0.720792	1.2398	0.596002	-0.720792	0.610474	-0.720792	0.912145	-0.720792	0.299982	0.0906389	2	0.0899736	1.0839	1.77007	2	-0.720792	-0.720792	1.93558	1.75766	2
IGFBP2--chr2--+	0.952781	1.44862	-0.572162	0.536489	0.307967	-0.572162	2	0.384651	-0.572162	1.54372	1.2549	2	1.74852	-0.572162	-0.572162	-0.572162	-0.572162	-0.572162	2	1.45249	1.58977	2	2	1.84827	1.36159	2	-0.572162	0.665226	-0.572162	-0.572162	2	2	-0.572162	0.882346	-0.572162	1.6872	-0.572162	-0.572162	0.978525	-0.572162	0.31366	-0.572162	1.84875	2	1.0352	2	-0.572162	2	-0.572162
IGFBP7--chr4---	-0.636696	-0.636696	-0.636696	-0.636696	-0.636696	-0.636696	-0.636696	-0.149686	-0.636696	-0.636696	-0.636696	-0.636696	-0.636696	-0.636696	-0.636696	-0.636696	-0.636696	-0.636696	-0.636696	-0.636696	-0.636696	-0.069383	0.72881	-0.636696	-0.636696	-0.636696	-0.636696	-0.636696	-0.636696	-0.636696	-0.636696	-0.636696	-0.636696	-0.636696	-0.636696	-0.636696	-0.636696	-0.636696	-0.636696	-0.636696	-0.636696	-0.636696	-0.636696	-0.636696	-0.636696	-0.636696	-0.636696	-0.636696	-0.636696
IL32--chr16--+	0.432848	0.519462	-0.914186	0.700747	0.444693	0.112882	1.80875	0.533272	-0.914186	-0.914186	0.0746604	-0.914186	-0.914186	-0.914186	-0.914186	1.25244	-0.914186	-0.914186	0.166112	1.36879	-0.0395877	-0.914186	-0.914186	0.267271	0.732563	1.11404	-0.914186	-0.244485	-0.914186	-0.914186	-0.0483657	1.28042	-0.914186	0.379462	-0.262896	-0.448318	-0.914186	0.113694	0.997308	-0.432666	-0.43476	-0.914186	-0.243403	-0.914186	-0.0442491	-0.914186	0.656594	-0.387685	-0.039566
IL7R--chr5--+	-0.548982	-0.548982	-0.548982	-0.548982	-0.548982	-0.548982	-0.548982	-0.548982	-0.548982	-0.548982	-0.548982	-0.548982	-0.548982	-0.548982	-0.548982	-0.548982	-0.548982	-0.548982	-0.548982	-0.548982	-0.548982	-0.20923	-0.548982	-0.548982	-0.548982	-0.548982	-0.548982	-0.548982	-0.548982	-0.548982	-0.548982	-0.548982	-0.548982	-0.548982	-0.548982	-0.548982	-0.548982	-0.548982	-0.548982	-0.548982	-0.548982	-0.548982	-0.548982	-0.548982	-0.548982	-0.548982	-0.548982	-0.548982	-0.548982
ISCU--chr12--+	0.439386	-0.483808	-0.483808	0.692541	0.450066	-0.483808	-0.483808	-0.483808	-0.483808	-0.483808	1.45482	2	-0.483808	-0.483808	-0.483808	-0.483808	-0.483808	-0.483808	-0.483808	-0.483808	-0.483808	0.16888	2	-0.483808	-0.483808	0.990662	-0.483808	-0.483808	-0.483808	-0.483808	0.490383	-0.483808	-0.483808	-0.483808	0.793045	0.00956625	-0.483808	-0.483808	-0.483808	-0.483808	0.456106	-0.483808	0.83126	-0.483808	0.495597	-0.483808	-0.483808	0.548396	-0.483808
ISG15--chr1--+	0.247394	-0.471451	-0.471451	-0.471451	0.801448	0.449151	-0.471451	-0.471451	-0.471451	-0.471451	-0.471451	2	-0.471451	-0.471451	-0.471451	1.75231	2	-0.471451	-0.471451	-0.0200907	-0.471451	-0.471451	-0.471451	-0.0491989	-0.471451	-0.471451	-0.471451	-0.471451	-0.471451	-0.471451	-0.471451	-0.471451	-0.471451	-0.471451	-0.471451	-0.471451	-0.471451	-0.471451	0.809723	0.813768	-0.471451	-0.471451	-0.471451	-0.471451	0.291162	-0.471451	-0.471451	-0.471451	-0.471451
ISG20--chr15--+	-0.478093	-0.478093	2	-0.478093	-0.478093	-0.478093	-0.478093	-0.478093	-0.478093	-0.478093	-0.478093	-0.478093	-0.478093	-0.478093	-0.478093	-0.478093	-0.478093	-0.478093	-0.478093	-0.0268732	-0.478093	0.0299638	-0.478093	-0.478093	-0.478093	-0.478093	-0.478093	-0.478093	-0.478093	-0.478093	-0.478093	1.47769	-0.478093	-0.478093	-0.478093	-0.0940471	-0.478093	-0.478093	-0.478093	-0.478093	-0.478093	-0.478093	-0.478093	-0.478093	-0.478093	-0.478093	-0.478093	-0.478093	-0.478093
ITGB1--chr10---	-0.551422	-0.551422	2	1.0365	0.188304	-0.551422	-0.551422	-0.551422	-0.551422	-0.551422	-0.551422	-0.551422	-0.551422	-0.551422	-0.551422	-0.551422	-0.551422	-0.551422	-0.551422	-0.0922621	0.229051	-0.551422	-0.551422	0.23842	-0.551422	0.107805	-0.551422	-0.551422	-0.551422	-0.551422	-0.551422	-0.551422	-0.551422	-0.551422	1.68355	0.172035	-0.551422	-0.551422	0.1937	0.19634	-0.551422	1.1058	-0.551422	-0.551422	-0.551422	-0.551422	-0.551422	-0.551422	-0.551422
ITIH1--chr3--+	2	-0.172218	1.00281	1.65151	0.660471	1.65969	0.735094	1.2292	1.14403	-0.130927	-0.931462	2	2	0.508683	1.6152	1.60675	-0.931462	-0.931462	1.75477	0.678402	0.439295	1.10477	1.59992	1.48195	1.49276	1.44462	0.255095	-0.146905	-0.931462	-0.931462	1.52965	0.569919	0.794056	-0.00924108	1.07732	1.17494	1.14625	0.272704	0.909961	1.48178	2	-0.931462	1.26312	2	0.718955	-0.931462	0.908714	-0.314664	0.0931587
ITIH2--chr10--+	0.245463	0.0143154	-0.830902	1.82133	1.44224	1.28306	1.02437	1.05681	2	1.79113	-0.830902	1.72574	-0.830902	0.772319	-0.830902	-0.830902	-0.830902	-0.830902	1.37451	0.961256	1.28794	0.935783	1.0627	1.03144	1.86783	1.64941	-0.0568296	0.0424948	-0.830902	1.69001	-0.182852	1.3259	0.364733	0.856221	-0.830902	0.42839	2	1.57791	1.45352	0.642845	1.66066	1.35205	0.87787	-0.830902	2	1.18623	-0.830902	1.08044	-0.830902
ITIH3--chr3--+	1.6149	2	1.02122	0.66972	1.1281	0.295324	-0.152893	0.78433	0.0915067	1.43929	-0.899382	-0.899382	1.33064	-0.0364899	-0.899382	-0.899382	-0.899382	2	1.33487	0.970439	-0.314767	1.12245	1.6141	1.73448	0.703132	1.72013	-0.208963	1.64122	2	-0.899382	1.37521	1.36819	-0.899382	0.0163175	-0.141789	1.66921	1.16364	0.296269	1.32411	1.49679	2	-0.899382	1.27969	2	1.55245	-0.899382	1.78172	1.46153	0.117993
ITIH4--chr3---	1.74392	2	-0.0852696	0.759724	1.58328	0.849158	0.923478	1.17171	0.00841432	0.72205	1.3043	0.77807	0.472475	0.443597	-1.36846	0.315377	0.780363	1.90795	1.32319	1.09025	0.378738	1.22269	1.36162	1.3558	0.700205	0.890717	0.74709	0.46599	1.64854	2	0.902439	1.52147	-0.223759	0.781802	1.16263	1.4746	1.28656	0.676381	1.03061	1.22583	1.42115	1.05286	0.467812	1.91182	0.96787	0.400288	-0.147695	0.768498	0.915557
ITM2B--chr13--+	0.147422	-0.612445	-0.612445	-0.612445	-0.612445	-0.612445	-0.612445	-0.612445	0.76215	-0.612445	0.983215	-0.612445	-0.612445	1.37125	-0.612445	-0.612445	-0.612445	-0.612445	-0.612445	-0.135326	-0.612445	-0.612445	-0.612445	-0.612445	-0.612445	-0.612445	-0.612445	-0.612445	-0.612445	-0.612445	0.189398	-0.612445	-0.612445	-0.612445	-0.612445	0.139307	2	-0.612445	0.16182	-0.612445	0.161185	1.10959	-0.00888809	-0.612445	0.193689	-0.612445	-0.612445	-0.612445	-0.612445
JMJD1C--chr10---	-0.440526	-0.440526	-0.440526	-0.440526	-0.440526	-0.440526	-0.440526	-0.440526	-0.440526	-0.440526	-0.440526	-0.440526	-0.440526	-0.440526	-0.440526	-0.440526	-0.440526	-0.440526	0.8366	-0.440526	-0.440526	-0.440526	-0.440526	-0.440526	-0.440526	-0.440526	-0.440526	-0.440526	-0.440526	-0.440526	-0.440526	-0.440526	-0.440526	-0.440526	-0.440526	0.490591	-0.440526	-0.440526	0.518475	0.521874	-0.440526	-0.440526	-0.440526	-0.440526	-0.440526	-0.440526	-0.440526	0.611776	-0.440526
JUN--chr1---	0.228898	-0.6961	-0.6961	-0.6961	-0.6961	-0.6961	-0.6961	-0.6961	-0.6961	0.978813	-0.6961	-0.6961	-0.6961	1.08931	-0.6961	-0.6961	-0.6961	-0.6961	-0.6961	-0.364719	-0.6961	-0.6961	-0.6961	-0.38609	-0.6961	-0.6961	-0.0308835	0.0544731	-0.6961	-0.6961	-0.6961	0.176582	-0.6961	-0.6961	-0.6961	-0.6961	-0.6961	-0.6961	-0.6961	-0.6961	-0.158779	0.499931	-0.6961	-0.6961	-0.6961	-0.6961	-0.6961	-0.6961	-0.6961
JUNB--chr19--+	-0.625466	-0.625466	-0.625466	0.776032	-0.625466	-0.625466	-0.625466	-0.625466	-0.625466	0.311126	-0.625466	-0.625466	-0.625466	-0.625466	-0.625466	-0.625466	-0.625466	-0.625466	0.8552	-0.625466	-0.625466	-0.625466	-0.625466	-0.625466	-0.625466	-0.0436315	-0.625466	-0.625466	-0.625466	-0.625466	0.0556031	-0.625466	-0.625466	-0.625466	-0.625466	-0.625466	-0.625466	-0.625466	-0.625466	0.0345096	-0.625466	-0.625466	-0.625466	-0.625466	-0.625466	-0.625466	-0.625466	-0.625466	-0.625466
KHK--chr2--+	0.544421	0.949267	1.79018	1.33432	-0.700675	0.209108	-0.700675	1.1078	-0.700675	0.330212	-0.700675	-0.700675	-0.700675	-0.700675	-0.700675	-0.700675	-0.700675	2	0.263303	0.115385	1.06451	0.552679	2	1.45361	0.228904	0.433927	1.71621	0.309636	2	2	0.605502	2	-0.700675	1.25092	0.281861	0.756025	2	0.849986	0.0231813	0.0257466	1.3594	-0.700675	1.74186	-0.700675	1.05592	-0.700675	-0.700675	0.0936046	-0.700675
KLF6--chr10---	-0.166253	-0.761748	-0.761748	-0.761748	0.292728	0.537077	-0.761748	-0.761748	0.315498	0.1024	-0.761748	-0.761748	-0.761748	0.176346	-0.761748	-0.761748	-0.761748	-0.761748	1.03115	-0.387838	1.02793	-0.34074	-0.761748	-0.411952	-0.761748	0.526722	-0.761748	-0.761748	1.22019	-0.761748	0.333164	0.858937	-0.761748	-0.761748	-0.761748	-0.172613	-0.761748	-0.761748	-0.15497	-0.761748	-0.761748	-0.761748	0.397615	-0.761748	0.33837	-0.761748	-0.761748	0.774646	-0.761748
KLRB1--chr12---	-0.475772	-0.475772	-0.475772	-0.475772	-0.475772	-0.475772	-0.475772	-0.475772	-0.475772	-0.475772	-0.475772	-0.475772	-0.475772	-0.475772	-0.475772	-0.475772	-0.475772	-0.475772	-0.475772	-0.475772	-0.475772	-0.475772	-0.475772	-0.475772	-0.475772	-0.475772	-0.475772	-0.475772	-0.475772	-0.475772	-0.475772	-0.475772	-0.475772	-0.475772	-0.475772	-0.475772	-0.475772	-0.475772	-0.475772	-0.475772	-0.475772	-0.475772	-0.475772	-0.475772	0.160317	-0.475772	-0.475772	-0.475772	-0.475772
KMT2E--chr7--+	0.968186	-0.508049	-0.508049	-0.508049	-0.508049	-0.508049	-0.508049	-0.508049	1.01562	-0.508049	-0.508049	-0.508049	-0.508049	-0.508049	-0.508049	-0.508049	-0.508049	-0.508049	-0.508049	0.0208121	-0.508049	0.087429	-0.508049	-0.508049	-0.508049	0.25125	-0.508049	1.50475	-0.508049	-0.508049	-0.508049	-0.508049	-0.508049	-0.508049	-0.508049	-0.0579204	-0.508049	-0.508049	-0.508049	-0.508049	-0.508049	-0.508049	-0.508049	-0.508049	-0.508049	-0.508049	-0.508049	-0.508049	-0.508049
KNG1--chr3--+	1.18718	1.76667	2	1.42087	0.838358	1.16076	-0.581119	0.948772	1.12423	0.564825	0.357242	2	0.708032	0.673827	-1.2298	2	1.56502	0.968873	0.911932	0.597945	0.761329	0.280467	0.237863	2	0.663905	0.692606	0.615609	0.774845	-1.2298	-1.2298	0.893717	2	-0.303104	-1.2298	0.938552	1.91198	1.34315	1.00719	1.1013	0.852413	0.846736	-1.2298	1.31735	1.39321	1.26986	-1.2298	1.10001	0.821774	1.16531
KRT18--chr12--+	1.06268	-0.170512	-0.909659	-0.909659	0.0413369	-0.909659	1.02505	0.114642	-0.909659	-0.909659	0.218116	-0.909659	0.522806	-0.909659	-0.909659	0.751738	-0.909659	1.57111	-0.909659	0.340081	-0.909659	-0.529966	0.746305	0.584379	-0.206902	-0.42551	-0.232728	0.373753	1.71422	1.29489	-0.342936	1.31361	-0.909659	-0.0118485	0.34304	0.0226467	1.9934	-0.909659	0.0475187	-0.360488	-0.909659	-0.909659	-0.48308	-0.909659	1.14349	-0.909659	-0.909659	0.761817	0.0878408
KRT8--chr12---	-0.103136	0.136273	1.49143	0.0713283	-0.0957757	-0.739362	-0.739362	-0.0397018	-0.739362	0.183894	0.596661	-0.739362	-0.739362	-0.739362	-0.739362	-0.739362	-0.739362	-0.739362	0.12397	-0.339877	0.442301	0.383134	1.22238	-0.0521735	0.093163	-0.739362	-0.739362	0.781038	-0.739362	-0.739362	-0.0679906	0.992177	-0.739362	0.324233	-0.739362	0.746748	-0.739362	-0.739362	-0.0910812	0.398144	-0.0916128	0.702474	0.499301	-0.739362	1.16406	-0.739362	-0.739362	-0.739362	1.17277
KRTCAP2--chr1---	1.26234	-0.813836	-0.813836	-0.010553	0.302472	-0.813836	0.637842	-0.813836	-0.813836	-0.813836	-0.813836	1.81061	0.867634	2	-0.813836	-0.813836	-0.813836	2	0.0416076	0.653147	-0.813836	-0.368141	2	-0.443529	0.587279	-0.245527	-0.813836	0.0827247	-0.813836	1.77393	-0.148599	2	-0.813836	0.240041	-0.813836	-0.190156	-0.813836	0.562237	-0.813836	-0.813836	-0.172005	2	0.413509	1.61724	-0.813836	-0.813836	2	-0.108984	0.35706
KTN1--chr14--+	0.35508	-0.547475	-0.547475	0.602576	0.365521	0.6084	0.682536	-0.547475	2	2	-0.547475	-0.547475	-0.547475	-0.547475	-0.547475	-0.547475	-0.547475	-0.547475	-0.547475	0.0192368	-0.547475	0.608727	-0.547475	-0.0173103	-0.547475	-0.547475	-0.547475	-0.547475	-0.547475	-0.547475	2	-0.547475	-0.547475	0.961349	-0.547475	-0.547475	-0.547475	-0.547475	1.06112	0.37544	-0.547475	-0.547475	0.169418	-0.547475	-0.547475	-0.547475	-0.547475	0.461653	1.12888
LAMTOR2--chr1--+	0.319799	-0.551563	2	0.558741	0.991407	-0.551563	0.635938	-0.551563	-0.551563	0.712908	2	-0.551563	1.77258	0.82111	-0.551563	2	-0.551563	-0.551563	0.630838	-0.00443741	1.06682	0.985784	2	-0.0397215	1.38507	1.75028	-0.551563	-0.551563	2	-0.551563	-0.551563	1.81992	-0.551563	0.905115	0.653602	0.310493	-0.551563	0.565372	0.336309	-0.551563	-0.551563	-0.551563	1.14488	-0.551563	0.372854	-0.551563	2	1.13491	-0.551563
LAMTOR4--chr7--+	-0.628303	-0.628303	-0.628303	0.341356	-0.628303	-0.628303	1.12405	-0.628303	-0.628303	-0.628303	1.90898	-0.628303	-0.628303	0.570489	-0.628303	-0.628303	-0.628303	-0.628303	-0.628303	-0.628303	-0.628303	-0.628303	-0.628303	0.193636	-0.628303	-0.628303	-0.628303	-0.628303	1.90442	-0.628303	0.174718	-0.628303	-0.628303	-0.628303	-0.628303	-0.628303	-0.628303	-0.628303	0.147099	-0.628303	-0.628303	-0.628303	1.19278	-0.628303	0.77754	-0.628303	-0.628303	0.222537	-0.628303
LAMTOR5--chr1---	-0.589464	-0.589464	-0.589464	0.417785	-0.589464	0.422885	1.23082	-0.589464	-0.589464	0.557642	2	-0.589464	-0.589464	-0.589464	-0.589464	-0.589464	-0.589464	-0.589464	-0.589464	-0.093121	-0.589464	-0.0306002	-0.589464	-0.589464	0.444913	-0.589464	-0.589464	-0.589464	2	2	0.244687	2	-0.589464	0.732009	-0.589464	0.192578	-0.589464	-0.589464	-0.589464	0.218852	-0.589464	-0.589464	0.0384117	-0.589464	0.249151	-0.589464	-0.589464	-0.589464	-0.589464
LAPTM4A--chr2---	0.689919	-0.622629	2	-0.622629	-0.622629	0.33644	-0.622629	-0.622629	-0.622629	-0.622629	-0.622629	2	-0.622629	1.33238	-0.622629	-0.622629	-0.622629	-0.622629	-0.622629	-0.622629	-0.622629	-0.0931781	1.68648	-0.622629	-0.622629	-0.622629	0.321296	-0.622629	-0.622629	-0.622629	0.167621	0.615685	-0.622629	-0.622629	-0.622629	0.118254	-0.622629	0.337307	-0.622629	-0.622629	-0.622629	-0.622629	-0.622629	-0.622629	0.17185	-0.622629	-0.622629	-0.622629	0.768304
LCP1--chr13---	-0.397708	-0.397708	-0.397708	-0.397708	-0.397708	-0.397708	-0.397708	-0.397708	-0.397708	-0.397708	-0.397708	-0.397708	-0.397708	-0.397708	-0.397708	-0.397708	-0.397708	-0.397708	-0.397708	-0.397708	-0.397708	-0.397708	-0.397708	-0.397708	-0.397708	-0.397708	-0.397708	-0.397708	-0.397708	-0.397708	-0.397708	-0.397708	-0.397708	-0.397708	-0.397708	-0.397708	-0.397708	-0.397708	-0.397708	-0.397708	-0.397708	-0.397708	-0.397708	-0.397708	-0.397708	-0.397708	-0.397708	-0.397708	-0.397708
LDHA--chr11--+	0.392591	-0.765288	1.55109	0.669254	-0.0970116	-0.765288	0.755982	1.56288	0.429794	0.841286	1.43741	-0.765288	0.99679	-0.765288	-0.765288	-0.765288	-0.765288	2	-0.765288	-0.350478	0.461708	0.918576	-0.765288	0.892208	1.86303	1.25296	-0.765288	-0.765288	1.43345	-0.765288	-0.765288	1.03268	-0.765288	0.339111	0.775659	0.149906	-0.765288	-0.765288	-0.765288	0.415856	0.411278	-0.765288	0.815653	1.78233	1.7603	-0.765288	-0.765288	-0.765288	0.461739
LDHB--chr12---	-0.457191	-0.457191	-0.457191	-0.457191	0.441973	-0.457191	-0.457191	-0.457191	-0.457191	-0.457191	-0.457191	-0.457191	-0.457191	-0.457191	-0.457191	-0.457191	-0.457191	-0.457191	-0.457191	-0.457191	-0.457191	-0.457191	-0.457191	0.0649415	-0.457191	-0.457191	-0.457191	-0.457191	-0.457191	-0.457191	0.480792	-0.457191	-0.457191	-0.457191	-0.457191	0.0178458	-0.457191	-0.457191	-0.457191	-0.457191	-0.457191	-0.457191	-0.457191	-0.457191	-0.457191	-0.457191	-0.457191	-0.457191	-0.457191
LEAP2--chr5--+	0.458912	0.830894	-0.815016	1.8919	0.142286	0.739855	1.13252	0.216077	0.162957	1.49317	0.987517	1.43561	1.38594	1.01388	-0.815016	1.6724	-0.815016	2	1.12642	1.36513	0.189073	0.740205	1.66571	1.27693	0.76661	1.51351	-0.133596	1.19378	2	1.40415	1.42993	1.94507	-0.815016	0.670166	1.15356	0.839383	1.22112	0.74097	0.148509	2	0.752721	0.410148	1.19613	-0.815016	1.04225	-0.815016	0.98833	0.579793	-0.815016
LEPROTL1--chr8--+	-0.44074	-0.44074	-0.44074	0.540795	-0.44074	-0.44074	-0.44074	-0.44074	-0.44074	-0.44074	-0.44074	-0.44074	-0.44074	-0.44074	-0.44074	-0.44074	-0.44074	-0.44074	-0.44074	-0.44074	0.381398	-0.44074	-0.44074	-0.44074	-0.44074	-0.44074	-0.44074	-0.44074	-0.44074	-0.44074	-0.44074	-0.44074	-0.44074	-0.44074	0.624654	-0.0290731	-0.44074	-0.44074	-0.44074	-0.44074	-0.44074	-0.44074	-0.44074	-0.44074	0.376467	-0.44074	-0.44074	-0.44074	-0.44074
LGALS1--chr22--+	-0.211725	-0.638886	-0.638886	-0.638886	-0.206783	-0.638886	0.344756	0.175817	-0.638886	-0.638886	-0.638886	-0.638886	-0.638886	0.0340288	-0.638886	-0.638886	-0.638886	1.33425	-0.638886	-0.638886	-0.638886	-0.638886	-0.638886	-0.638886	-0.638886	-0.638886	-0.638886	-0.638886	0.782801	-0.638886	-0.638886	0.8613	0.19275	-0.638886	-0.0480873	-0.638886	-0.638886	-0.638886	-0.203632	-0.202089	-0.638886	-0.638886	-0.638886	-0.638886	-0.638886	-0.638886	-0.638886	-0.638886	-0.638886
LGALS3--chr14--+	-0.647256	-0.647256	-0.647256	-0.647256	-0.647256	-0.647256	-0.647256	-0.647256	-0.647256	0.180788	1.25529	-0.647256	-0.647256	-0.647256	-0.647256	-0.647256	-0.647256	-0.647256	-0.647256	-0.288968	-0.647256	-0.647256	-0.647256	-0.0309344	-0.647256	-0.647256	-0.647256	-0.647256	1.25188	-0.647256	-0.647256	-0.647256	-0.647256	0.306655	-0.647256	-0.342307	-0.647256	-0.647256	-0.647256	-0.647256	-0.647256	-0.647256	-0.647256	-0.647256	-0.647256	-0.647256	-0.647256	-0.647256	-0.647256
LGALS4--chr19---	-0.18434	0.592773	1.28831	-0.0232159	0.923673	-0.771921	1.3448	0.348742	-0.771921	-0.771921	-0.771921	2	-0.771921	0.153706	-0.771921	1.93157	-0.771921	1.94222	-0.771921	-0.402981	-0.144802	1.3969	1.9243	0.526205	-0.771921	1.23712	-0.0313069	0.0637242	1.18368	1.64002	-0.151882	2	-0.771921	1.98644	0.0407509	0.248092	-0.771921	-0.771921	0.634062	-0.771921	0.633121	0.559672	0.372034	-0.771921	0.985966	-0.771921	2	0.365307	0.994006
LIME1--chr20--+	0.667727	0.398562	2	2	1.1154	0.974095	0.388919	1.61252	-0.58567	1.68388	1.79873	2	-0.58567	-0.58567	2	1.62661	-0.58567	-0.58567	-0.58567	1.07846	-0.58567	0.330437	1.61937	0.490197	1.00374	0.556496	0.952502	-0.58567	2	2	1.54521	2	2	-0.58567	0.403416	0.121824	-0.58567	0.331006	1.12552	0.692911	-0.58567	-0.58567	1.40415	2	-0.58567	1.76323	1.79981	0.213904	-0.58567
LINC00493--chr20--+	0.340062	-0.526171	2	0.577598	0.350083	-0.526171	-0.526171	1.12595	-0.526171	-0.526171	-0.526171	-0.526171	1.78429	-0.526171	-0.526171	-0.526171	-0.526171	-0.526171	-0.526171	-0.526171	-0.526171	0.0862463	-0.526171	-0.017342	-0.526171	-0.526171	-0.526171	0.705769	-0.526171	2	0.387913	0.906191	-0.526171	-0.526171	-0.526171	0.330811	-0.526171	-0.526171	0.356475	-0.526171	-0.526171	-0.526171	0.161871	-0.526171	-0.526171	-0.526171	-0.526171	0.442347	-0.526171
LMNA--chr1--+	-0.506057	-0.506057	-0.506057	-0.506057	0.256967	0.459949	-0.506057	-0.506057	-0.506057	-0.506057	-0.506057	-0.506057	-0.506057	1.46309	-0.506057	-0.506057	-0.506057	-0.506057	-0.506057	-0.506057	-0.506057	0.0272231	-0.506057	-0.506057	-0.506057	-0.506057	-0.506057	-0.506057	-0.506057	-0.506057	-0.506057	-0.506057	-0.506057	-0.506057	-0.506057	-0.506057	2	0.460822	-0.506057	-0.506057	-0.506057	-0.506057	-0.506057	-0.506057	0.294168	-0.506057	-0.506057	0.337308	-0.506057
LOC101243545--chr3--+	-0.238341	-0.83059	-0.83059	0.865964	-0.23149	-0.83059	0.958592	-0.83059	-0.83059	-0.83059	-0.83059	-0.83059	-0.83059	-0.83059	-0.83059	-0.83059	-0.83059	-0.83059	-0.83059	-0.458719	-0.83059	0.461477	0.995556	-0.83059	-0.0556106	-0.83059	-0.0840915	-0.83059	-0.83059	2	0.258355	1.24938	-0.83059	0.796435	0.550848	-0.51408	-0.83059	-0.83059	0.586565	-0.83059	-0.227614	0.511584	0.0130553	-0.83059	-0.20228	-0.83059	-0.83059	-0.83059	-0.83059
LPIN2--chr18---	0.158351	0.446224	-0.606668	1.05454	-0.606668	0.373069	-0.606668	1.34087	-0.606668	1.25376	2	-0.606668	-0.606668	0.598481	-0.606668	-0.606668	-0.606668	-0.606668	-0.606668	0.612596	0.209829	-0.0658081	-0.606668	-0.157293	0.394387	0.082987	-0.606668	-0.606668	-0.606668	-0.606668	1.67286	-0.606668	0.882741	0.672234	0.451416	-0.197826	2	0.373954	1.2239	0.175608	-0.606668	-0.606668	0.882741	-0.606668	1.28499	-0.606668	-0.606668	2	-0.606668
LRG1--chr19---	0.389736	0.734446	-0.526329	0.640937	1.0958	0.646848	1.58313	0.481071	-0.526329	0.803013	2	-0.526329	-0.526329	-0.526329	-0.526329	-0.526329	-0.526329	-0.526329	1.57524	1.60537	1.7499	2	-0.526329	2	0.672375	0.299492	1.44403	2	-0.526329	-0.526329	0.44034	-0.526329	-0.526329	-0.526329	2	-0.0367649	-0.526329	-0.526329	1.10634	1.1115	-0.526329	1.54969	0.778585	-0.526329	2	-0.526329	-0.526329	0.497904	-0.526329
LRPAP1--chr4---	-0.585376	-0.585376	-0.585376	2	-0.585376	-0.585376	-0.585376	1.03797	-0.585376	1.48449	-0.585376	-0.585376	-0.585376	-0.585376	-0.585376	-0.585376	-0.585376	2	-0.585376	-0.585376	-0.585376	-0.585376	-0.585376	-0.0854099	0.528378	-0.585376	0.487447	-0.585376	-0.585376	-0.585376	-0.585376	-0.585376	-0.585376	2	-0.585376	-0.585376	-0.585376	-0.585376	-0.585376	-0.585376	0.281184	-0.585376	0.62706	-0.585376	0.317593	-0.585376	-0.585376	-0.585376	-0.585376
LSM3--chr3--+	-0.574936	-0.574936	-0.574936	1.68977	-0.574936	0.437544	-0.574936	-0.574936	-0.574936	-0.574936	2	-0.574936	-0.574936	0.67049	-0.574936	-0.574936	-0.574936	-0.574936	0.497856	-0.574936	0.893421	-0.0160002	-0.574936	-0.110542	-0.574936	0.687741	-0.574936	-0.574936	2	2	-0.574936	0.73234	-0.574936	-0.574936	-0.574936	-0.15243	-0.574936	-0.574936	-0.574936	-0.574936	0.229969	-0.574936	0.551236	-0.574936	0.263787	-0.574936	-0.574936	-0.574936	-0.574936
LSM7--chr19---	0.309549	-0.529741	-0.529741	-0.529741	0.319258	-0.529741	-0.529741	-0.529741	-0.529741	-0.529741	-0.529741	-0.529741	-0.529741	-0.529741	-0.529741	-0.529741	-0.529741	2	0.60914	-0.00275311	-0.529741	0.0636279	-0.529741	-0.529741	-0.529741	-0.529741	0.52814	-0.529741	2	-0.529741	-0.529741	0.858069	-0.529741	1.77595	-0.529741	-0.529741	2	-0.529741	0.325451	-0.529741	-0.529741	-0.529741	-0.529741	-0.529741	0.360652	-0.529741	2	-0.529741	-0.529741
LST1--chr6--+	-0.328065	-0.328065	-0.328065	-0.328065	-0.328065	-0.328065	-0.328065	-0.328065	-0.328065	-0.328065	-0.328065	-0.328065	-0.328065	-0.328065	-0.328065	-0.328065	-0.328065	-0.328065	-0.328065	-0.328065	-0.328065	-0.328065	-0.328065	-0.328065	-0.328065	-0.328065	-0.328065	-0.328065	-0.328065	-0.328065	-0.328065	-0.328065	-0.328065	-0.328065	-0.328065	-0.328065	-0.328065	-0.328065	-0.328065	-0.328065	-0.328065	-0.328065	-0.328065	-0.328065	-0.328065	-0.328065	-0.328065	-0.328065	-0.328065
LTB--chr6---	-0.41086	-0.41086	-0.41086	-0.41086	-0.41086	-0.41086	-0.41086	-0.41086	-0.41086	-0.41086	-0.41086	-0.41086	-0.41086	-0.41086	-0.41086	-0.41086	-0.41086	-0.41086	-0.41086	-0.41086	-0.41086	-0.41086	-0.41086	-0.41086	-0.41086	-0.41086	-0.41086	-0.41086	-0.41086	-0.41086	-0.41086	-0.41086	-0.41086	-0.41086	-0.41086	-0.41086	-0.41086	-0.41086	-0.41086	-0.41086	-0.41086	-0.41086	-0.41086	-0.41086	-0.41086	-0.41086	-0.41086	-0.41086	-0.41086
LUC7L3--chr17--+	-0.532626	-0.532626	-0.532626	-0.532626	-0.532626	-0.532626	-0.532626	0.353338	-0.532626	-0.532626	-0.532626	-0.532626	-0.532626	-0.532626	-0.532626	-0.532626	-0.532626	-0.532626	-0.532626	-0.532626	-0.532626	-0.532626	-0.532626	0.337546	-0.532626	-0.532626	-0.532626	-0.532626	-0.532626	-0.532626	-0.532626	0.799541	-0.532626	-0.532626	-0.532626	-0.532626	-0.532626	-0.532626	-0.532626	-0.532626	-0.532626	-0.532626	-0.532626	-0.532626	0.322067	-0.532626	-0.532626	-0.532626	-0.532626
LUM--chr12---	-0.510305	-0.510305	2	-0.510305	-0.510305	-0.510305	-0.510305	-0.510305	-0.510305	-0.510305	-0.510305	-0.510305	-0.510305	0.762064	-0.510305	-0.510305	-0.510305	-0.510305	-0.510305	-0.510305	-0.510305	-0.510305	-0.510305	-0.510305	-0.510305	-0.510305	-0.510305	-0.510305	-0.510305	-0.510305	-0.510305	-0.510305	-0.510305	-0.510305	-0.510305	-0.510305	2	-0.510305	-0.510305	-0.510305	-0.510305	-0.510305	-0.510305	-0.510305	-0.510305	-0.510305	-0.510305	-0.510305	-0.510305
LY6E--chr8--+	0.366983	-0.551714	-0.551714	0.618906	0.377611	-0.551714	0.700296	-0.551714	-0.551714	-0.551714	-0.551714	-0.551714	1.89868	-0.551714	-0.551714	-0.551714	-0.551714	-0.551714	1.55589	0.50363	-0.551714	0.0977948	-0.551714	-0.0120674	0.650435	0.915574	-0.551714	-0.551714	-0.551714	-0.551714	1.13746	-0.551714	-0.551714	0.984096	-0.551714	-0.0607428	-0.551714	-0.551714	-0.551714	1.09082	-0.551714	-0.551714	0.178	-0.551714	-0.551714	-0.551714	-0.551714	1.81855	2
LYZ--chr12--+	-0.494725	-0.494725	-0.494725	-0.494725	-0.494725	-0.494725	-0.494725	-0.494725	-0.494725	-0.494725	-0.494725	-0.494725	-0.494725	0.558711	-0.494725	-0.494725	-0.494725	-0.494725	-0.494725	-0.0748421	-0.494725	-0.494725	-0.494725	-0.494725	-0.494725	-0.494725	-0.494725	-0.494725	-0.494725	-0.494725	-0.494725	0.611026	-0.494725	-0.494725	-0.494725	-0.494725	-0.494725	-0.494725	-0.494725	-0.494725	-0.494725	-0.494725	-0.494725	-0.494725	-0.494725	-0.494725	-0.494725	0.252949	-0.494725
MALAT1--chr11--+	-1.1745	-0.326006	0.160921	-0.519163	-1.40002	-0.278531	-0.462967	-0.149857	-0.562972	-0.408612	-0.426241	-1.70784	-1.70784	1.13799	-0.30307	-1.70784	0.0789029	-1.70784	-1.00974	-0.601961	-0.0372426	-1.17096	-1.70784	-0.330483	-0.643685	-0.778195	-0.292715	-1.27507	-0.695058	-1.70784	-0.350263	-1.20466	-0.756024	-0.438309	-0.99805	-0.844463	-1.70784	0.318892	-1.16549	-0.376669	-1.16589	-1.01822	-0.57581	-1.70784	0.683442	-0.708343	-1.70784	-0.760766	-0.539746
MAP1LC3B--chr16--+	-0.489136	-0.489136	-0.489136	-0.489136	0.462414	-0.489136	-0.489136	-0.489136	-0.489136	-0.489136	-0.489136	-0.489136	-0.489136	-0.489136	-0.489136	-0.489136	-0.489136	-0.489136	0.78731	-0.489136	-0.489136	-0.489136	-0.489136	0.52688	-0.489136	1.01324	0.696526	0.848663	-0.489136	-0.489136	0.503494	-0.489136	-0.489136	-0.489136	-0.489136	0.0135769	-0.489136	-0.489136	-0.489136	1.19268	-0.489136	-0.489136	-0.489136	-0.489136	-0.489136	-0.489136	-0.489136	-0.489136	-0.489136
MASP2--chr1---	0.459219	0.808673	2	0.713876	1.175	-0.46945	0.79615	-0.46945	1.21051	-0.46945	-0.46945	2	2	-0.46945	-0.46945	-0.46945	-0.46945	-0.46945	-0.46945	1.01063	0.521709	0.187109	2	0.533607	0.745747	1.01376	-0.46945	-0.46945	-0.46945	2	0.510519	2	-0.46945	-0.46945	0.814976	2	-0.46945	-0.46945	-0.46945	-0.46945	0.476039	1.63513	0.853418	-0.46945	1.24618	-0.46945	2	1.32794	1.25541
MDH2--chr7--+	0.35001	0.67909	2	-0.524518	1.55571	-0.524518	-0.524518	0.437204	-0.524518	-0.524518	1.31192	-0.524518	-0.524518	-0.524518	-0.524518	2	-0.524518	-0.524518	-0.524518	0.480087	-0.524518	-0.524518	-0.524518	1.40755	-0.524518	-0.524518	-0.524518	-0.524518	2	-0.524518	-0.524518	0.92156	-0.524518	-0.524518	-0.524518	0.686989	-0.524518	-0.524518	-0.524518	-0.524518	1.03299	-0.524518	0.170113	-0.524518	-0.524518	-0.524518	2	0.453274	-0.524518
MGMT--chr10--+	1.37433	-0.595068	-0.595068	-0.595068	0.884847	0.475255	0.543904	1.97389	-0.595068	-0.595068	1.15995	-0.595068	-0.595068	-0.595068	-0.595068	1.99035	-0.595068	-0.595068	0.539013	0.736929	1.48161	-0.00420024	2	0.307629	1.26242	0.739746	0.458354	-0.595068	-0.595068	-0.595068	0.941597	2	-0.595068	-0.595068	-0.595068	1.3571	-0.595068	0.476223	0.25652	1.41053	0.255821	-0.595068	0.0687638	-0.595068	1.47149	-0.595068	-0.595068	-0.595068	-0.595068
MGP--chr12---	-0.506725	-0.506725	-0.506725	-0.506725	-0.506725	-0.506725	-0.506725	-0.506725	-0.506725	-0.506725	-0.506725	-0.506725	-0.506725	-0.506725	-0.506725	-0.506725	-0.506725	-0.506725	-0.506725	-0.506725	-0.506725	-0.136753	-0.506725	-0.506725	-0.506725	-0.506725	-0.506725	-0.506725	-0.506725	-0.506725	-0.506725	-0.506725	-0.506725	-0.506725	-0.506725	-0.227058	-0.506725	-0.506725	-0.506725	-0.506725	-0.506725	-0.506725	-0.506725	-0.506725	-0.506725	-0.506725	-0.506725	-0.506725	-0.506725
MGST1--chr12--+	1.19802	-0.291643	1.81389	1.13942	0.80817	0.163584	0.638675	0.00869014	0.592147	-0.249305	0.117672	-1.07014	0.438582	-1.07014	-1.07014	-1.07014	-1.07014	1.54269	-1.07014	0.860748	-0.0195637	1.01772	-1.07014	1.11866	-0.32997	0.657919	0.146504	0.281595	0.812457	2	0.615316	0.916405	0.0311123	-0.124534	0.658647	0.778409	1.06026	-0.345078	0.571202	0.575618	0.282453	1.45193	-0.264389	-1.07014	1.28687	0.787762	0.816696	0.389245	1.10116
MGST2--chr4--+	0.829681	-0.615816	-0.615816	1.74672	0.844591	0.440398	0.508142	0.291149	-0.615816	-0.615816	1.11606	2	-0.615816	-0.615816	-0.615816	-0.615816	-0.615816	2	-0.615816	1.79095	0.264416	0.839268	-0.615816	0.624943	0.463381	0.127673	-0.615816	-0.615816	-0.615816	-0.615816	1.84165	-0.615816	-0.615816	0.762916	-0.615816	0.815889	-0.615816	-0.615816	-0.615816	0.227525	0.853009	-0.615816	0.0392655	-0.615816	1.4235	-0.615816	2	0.306304	-0.615816
MGST3--chr1--+	-0.186811	0.0337198	-0.77287	0.905951	0.621179	-0.0223221	0.0258171	0.71908	-0.77287	-0.77287	-0.77287	-0.77287	-0.77287	-0.77287	-0.77287	-0.77287	-0.77287	-0.77287	0.571623	0.590901	0.988448	-0.358533	2	0.108816	-0.00599055	-0.244545	-0.77287	-0.77287	1.17767	-0.77287	-0.154437	1.95845	-0.77287	0.20686	0.594129	-0.459668	1.43441	-0.77287	-0.77287	-0.77287	-0.77287	1.31032	-0.307368	1.48716	0.980466	-0.77287	-0.77287	-0.11761	-0.77287
MIF--chr22--+	0.71621	-1.16718	1.71727	1.1846	0.188218	-1.16718	0.754291	-1.16718	-0.317514	-0.0249548	1.13096	-1.16718	0.74502	0.711268	-1.16718	1.46635	-1.16718	1.00241	0.748644	1.23854	-0.665886	0.774623	0.281069	0.365972	0.206944	0.0735816	-1.16718	1.1872	1.61023	0.760843	1.58207	1.72066	-1.16718	0.496306	0.543129	0.367784	1.8706	-1.16718	0.400638	-0.686896	0.194877	0.927049	0.13971	-1.16718	-0.668893	-1.16718	1.61477	0.044636	0.244439
MINOS1--chr1--+	0.485004	-0.75205	-0.75205	0.147302	-0.0380773	0.151856	1.38019	-0.75205	-0.75205	-0.75205	0.730089	-0.75205	-0.75205	-0.75205	-0.75205	1.43138	-0.75205	-0.75205	1.78261	0.372845	0.00125103	0.493209	-0.75205	0.572806	-0.75205	-0.75205	-0.75205	-0.75205	1.59704	-0.75205	0.54569	0.41504	-0.75205	1.18694	-0.75205	0.225724	-0.75205	0.152673	-0.75205	-0.75205	-0.0334591	0.847474	0.253357	1.96977	-0.75205	-0.75205	-0.75205	0.614	-0.75205
MMP7--chr11---	-0.361866	-0.361866	-0.361866	-0.361866	-0.361866	-0.361866	-0.361866	-0.361866	-0.361866	-0.361866	-0.361866	-0.361866	-0.361866	-0.361866	-0.361866	-0.361866	-0.361866	-0.361866	-0.361866	-0.361866	-0.361866	-0.361866	-0.361866	-0.361866	-0.361866	-0.361866	-0.361866	-0.361866	-0.361866	-0.361866	-0.361866	-0.361866	-0.361866	-0.361866	-0.361866	-0.361866	-0.361866	-0.361866	-0.361866	-0.361866	-0.361866	-0.361866	-0.361866	-0.361866	-0.361866	-0.361866	-0.361866	-0.361866	-0.361866
MORF4L1--chr15--+	-0.609339	-0.609339	-0.609339	0.340839	-0.609339	-0.609339	1.10781	0.210705	-0.609339	1.75721	-0.609339	-0.609339	-0.609339	0.565369	-0.609339	-0.609339	-0.609339	-0.609339	-0.609339	0.247271	-0.609339	-0.0821407	-0.609339	-0.609339	-0.609339	-0.609339	-0.609339	-0.609339	-0.609339	-0.609339	0.177549	-0.609339	-0.609339	-0.609339	-0.609339	0.128392	-0.609339	-0.609339	-0.609339	0.723886	-0.609339	1.08058	-0.609339	-0.609339	-0.609339	-0.609339	-0.609339	0.224408	-0.609339
MPC1--chr6---	-0.628407	-0.628407	2	0.343089	-0.628407	-0.628407	-0.628407	0.210035	-0.628407	-0.628407	0.972625	-0.628407	1.40517	1.36196	-0.628407	-0.628407	-0.628407	-0.628407	-0.628407	-0.149682	0.185322	0.716743	-0.628407	1.056	-0.628407	1.02125	-0.628407	0.455899	-0.628407	-0.628407	0.773434	2	-0.628407	0.646159	0.42609	0.427801	-0.628407	0.348891	0.148464	-0.628407	0.147827	-0.628407	-0.628407	-0.628407	0.180441	-0.628407	-0.628407	0.224045	0.787682
MPC2--chr1---	0.571444	-0.0339544	1.28168	2	0.585188	1.24211	1.34106	1.01456	0.233309	1.07619	0.413005	1.68734	-0.884047	0.728421	-0.884047	1.02672	-0.884047	1.96907	0.975607	0.100373	-0.224817	1.24256	1.02047	0.665648	1.57333	0.747618	0.444489	-0.00561247	1.17169	1.6514	-0.884047	0.796984	-0.884047	0.148524	1.00373	-0.0283758	1.44228	-0.0923039	-0.254676	-0.252446	-0.255192	-0.884047	0.594072	-0.884047	0.257033	-0.884047	2	-0.884047	-0.884047
MPHOSPH8--chr13--+	-0.608111	-0.608111	1.91784	0.956221	0.120628	0.31449	-0.608111	-0.608111	-0.608111	-0.608111	0.904681	-0.608111	-0.608111	-0.608111	-0.608111	-0.608111	-0.608111	-0.608111	-0.608111	-0.608111	0.16077	0.662902	-0.608111	0.169999	-0.608111	0.041325	0.299921	-0.608111	-0.608111	-0.608111	-0.608111	0.583116	-0.608111	-0.608111	-0.608111	-0.223111	2	-0.608111	-0.608111	-0.608111	0.125342	-0.608111	-0.0358988	-0.608111	0.156158	-0.608111	-0.608111	-0.608111	-0.608111
MRFAP1--chr4--+	-0.479225	-0.479225	-0.479225	0.70192	-0.479225	-0.479225	-0.479225	-0.479225	-0.479225	-0.479225	-0.479225	-0.479225	-0.479225	-0.479225	-0.479225	2	-0.479225	-0.479225	-0.479225	-0.479225	-0.479225	-0.479225	-0.479225	0.0652732	-0.479225	-0.479225	0.689155	-0.479225	-0.479225	-0.479225	-0.479225	-0.479225	-0.479225	-0.479225	-0.479225	0.437832	-0.479225	-0.479225	-0.479225	-0.479225	-0.479225	-0.479225	0.25705	2	0.504172	-0.479225	-0.479225	-0.479225	-0.479225
MRPL20--chr1---	1.57756	-0.591662	-0.591662	0.581324	1.03842	-0.591662	-0.591662	0.420675	1.07361	-0.591662	-0.591662	-0.591662	-0.591662	0.858504	-0.591662	-0.591662	-0.591662	-0.591662	0.657491	-0.013649	-0.591662	0.0591593	-0.591662	-0.050925	-0.591662	0.878592	0.568648	-0.591662	-0.591662	-0.591662	-0.591662	0.930522	-0.591662	0.947252	0.68154	0.319061	-0.591662	-0.591662	-0.591662	1.05419	-0.591662	1.49453	0.719646	-0.591662	1.10897	-0.591662	2	-0.591662	-0.591662
MRPL40--chr22--+	0.371072	-0.519974	2	0.615412	1.05785	0.621161	-0.519974	-0.519974	-0.519974	-0.519974	1.35115	2	-0.519974	-0.519974	-0.519974	-0.519974	-0.519974	-0.519974	0.689137	0.0395109	-0.519974	-0.519974	2	0.00342975	0.645992	0.283292	-0.519974	-0.519974	-0.519974	-0.519974	0.420293	0.953416	-0.519974	-0.519974	0.712415	0.361555	-0.519974	-0.519974	1.61215	-0.519974	-0.519974	2	-0.519974	-0.519974	0.425325	-0.519974	-0.519974	1.20459	-0.519974
MRPL51--chr12---	1.35458	0.268659	1.82701	1.77081	0.00181832	-0.738264	-0.738264	1.51061	2	-0.738264	-0.738264	-0.738264	1.21315	0.414269	-0.738264	-0.738264	-0.738264	2	0.940162	0.102175	0.0425849	-0.221018	1.51762	0.635041	0.219086	-0.078719	-0.738264	1.0101	-0.738264	2	-0.738264	-0.738264	-0.738264	1.27164	0.968258	-0.347272	2	-0.738264	0.0072167	-0.738264	0.00660544	0.919754	0.30391	2	0.0379013	-0.738264	-0.738264	0.0797439	-0.738264
MRPL54--chr19--+	0.152827	-0.657627	-0.657627	-0.657627	-0.657627	1.67332	1.20864	0.233633	-0.657627	1.31329	2	2	1.50406	-0.657627	-0.657627	-0.657627	-0.657627	-0.657627	-0.657627	0.634051	0.207362	-0.0846448	-0.657627	-0.181563	-0.657627	1.81832	0.363908	1.87417	-0.657627	2	1.33771	-0.657627	-0.657627	1.56885	0.463298	0.749286	-0.657627	-0.657627	0.168183	0.17111	0.167506	1.17905	1.28185	-0.657627	0.202174	-0.657627	-0.657627	-0.657627	-0.657627
MRPL57--chr13--+	0.658911	-0.670365	1.9889	2	-0.670365	-0.670365	0.363224	-0.670365	-0.670365	-0.670365	0.922266	-0.670365	-0.670365	0.524396	-0.670365	-0.670365	-0.670365	-0.670365	1.06956	1.91859	0.738259	0.984236	-0.670365	0.148811	0.322062	0.540946	-0.670365	0.408252	-0.670365	-0.670365	0.129956	1.99322	-0.670365	0.597513	0.378599	0.380301	2	-0.670365	0.10243	-0.670365	-0.670365	1.0484	0.806206	-0.670365	0.134239	-0.670365	1.85953	0.177615	-0.670365
MRPS24--chr7---	0.60886	-0.674031	1.89244	-0.674031	0.0663965	0.263368	1.01148	0.130908	-0.674031	0.388148	-0.674031	2	-0.674031	-0.674031	-0.674031	-0.674031	-0.674031	-0.674031	0.319208	-0.214436	-0.674031	-0.156544	1.5829	0.699915	-0.674031	-0.0141784	1.40471	0.366948	-0.674031	2	1.12805	1.89661	-0.674031	-0.674031	-0.674031	0.339973	-0.674031	0.264215	-0.674031	0.0744407	0.0711859	2	0.368629	-0.674031	-0.674031	-0.674031	-0.674031	0.144358	0.685473
MT1A--chr16--+	1.6225	-0.434834	-0.434834	-0.434834	0.448339	-0.434834	-0.434834	-0.434834	1.14455	0.832121	1.39855	-0.434834	-0.434834	0.940535	-0.434834	-0.434834	-0.434834	-0.434834	0.749889	0.5681	-0.434834	0.683601	-0.434834	0.508173	-0.434834	0.959586	-0.434834	-0.434834	-0.434834	2	1.17045	1.00884	-0.434834	-0.434834	-0.434834	-0.434834	-0.434834	-0.434834	-0.434834	-0.434834	1.12008	-0.434834	0.258641	2	0.491399	-0.434834	-0.434834	1.25495	-0.434834
MT1E--chr16--+	1.32564	0.0938501	2	1.24674	0.933008	0.364303	1.90622	0.872712	0.394906	0.147254	-0.0149328	0.9931	0.262261	0.234569	2	-1.04093	-1.04093	-1.04093	0.430099	0.510787	-0.133474	0.364619	-1.04093	0.659134	0.0449763	0.249755	1.05417	0.12666	-1.04093	-1.04093	1.13881	2	-1.04093	-0.224144	0.738194	0.82466	2	0.0255678	0.376814	0.946955	-0.170771	0.0663258	1.01905	-1.04093	-0.522593	-1.04093	1.85296	-0.0952949	-1.04093
MT1F--chr16--+	2	0.421032	-0.614213	1.54053	1.55642	1.54918	1.65817	0.820416	0.746507	0.477334	2	-0.614213	-0.614213	0.570738	-0.614213	-0.614213	-0.614213	-0.614213	1.11142	0.584616	0.782844	1.30303	1.70512	1.27301	-0.614213	0.0638835	0.333892	-0.614213	-0.614213	2	0.179536	0.629585	-0.614213	-0.614213	1.14031	0.129951	-0.614213	-0.614213	0.152236	0.154953	0.725425	1.09044	0.457275	-0.614213	-0.614213	-0.614213	-0.614213	0.841622	-0.614213
MT1G--chr16---	1.64968	0.329727	2	1.73597	1.85667	0.933684	1.97945	0.744758	0.540095	-0.0401767	1.47282	1.28365	0.749541	0.611015	0.0915794	-0.486927	-1.6621	0.762813	1.44003	0.588253	0.5748	1.19471	0.979802	0.926071	1.39158	0.628639	0.700856	0.368829	-1.6621	2	1.06981	1.99629	-1.6621	1.06728	-0.0922811	0.587219	1.09387	-0.832891	0.370634	0.524784	1.15474	1.11355	1.8037	1.13749	0.332863	-0.414354	0.587919	-0.157598	0.249424
MT1H--chr16--+	1.48709	0.117282	-0.703751	2	2	1.34973	2	1.12995	-0.703751	-0.703751	0.548963	1.77974	0.887407	0.853597	-0.703751	-0.703751	-0.703751	2	1.43856	-0.0184664	1.08911	2	2	-0.0594129	1.91776	0.58701	0.579371	0.144656	1.28171	-0.703751	0.764961	2	-0.703751	-0.703751	0.687727	0.519509	2	1.01323	-0.0958944	0.362824	1.71652	0.648177	1.81142	2	-0.703751	-0.703751	-0.703751	1.42334	-0.703751
MT1M--chr16--+	1.00183	-0.628606	-0.628606	1.74428	1.36805	0.880504	1.86394	0.132287	-0.628606	1.56724	1.67836	-0.628606	1.21689	-0.628606	-0.628606	-0.628606	-0.628606	-0.628606	1.45457	-0.194159	-0.628606	1.13497	2	0.900007	0.27678	-0.00486009	-0.628606	-0.628606	-0.628606	-0.628606	0.643576	1.80137	-0.628606	-0.628606	0.328359	0.055912	-0.628606	0.2583	0.076411	1.0318	0.603657	-0.628606	1.53559	-0.628606	-0.628606	-0.628606	1.6794	0.145002	-0.628606
MT1X--chr16--+	1.28945	-0.995908	2	1.49704	1.43206	0.717933	1.74783	-0.995908	0.467247	0.584188	1.10099	-0.995908	-0.995908	0.30386	-0.995908	-0.995908	-0.995908	-0.995908	0.50311	0.316947	-0.0711846	1.71972	1.28873	0.629276	0.460702	0.868481	0.418071	-0.287825	-0.995908	1.04785	1.61086	1.73942	-0.995908	0.767434	-0.307291	0.527723	-0.995908	0.0908825	0.19545	0.198893	0.855091	0.132416	2	0.924099	0.235209	-0.995908	1.44108	0.779366	-0.0711616
MT2A--chr16--+	1.49996	-0.873279	2	1.73041	0.585165	0.331832	1.30287	-0.199401	0.339964	0.324084	0.374982	0.152066	0.265566	0.233421	-2	0.967501	-0.23916	1.37359	0.501321	0.662137	0.160831	0.996376	1.48613	0.3898	0.586648	1.00257	0.260557	0.104738	-0.595795	2	1.14097	2	-0.683569	0.726077	-0.163674	-0.000259465	1.57271	-0.438995	0.531579	0.503278	0.151752	0.655545	1.03294	1.25644	0.200094	-0.614819	0.622744	0.167279	0.20724
MTHFS--chr15---	0.37971	0.721312	-0.528096	0.628645	0.390211	-0.528096	0.70907	-0.528096	1.11412	-0.528096	1.37822	-0.528096	1.89325	-0.528096	-0.528096	2	-0.528096	-0.528096	1.55452	0.0419127	0.440795	1.4524	-0.528096	-0.528096	-0.528096	1.43612	-0.528096	0.762967	2	2	-0.528096	-0.528096	-0.528096	0.989506	-0.528096	-0.0429454	-0.528096	-0.528096	-0.528096	-0.528096	-0.528096	1.5292	0.765052	-0.528096	1.71663	-0.528096	2	1.22891	-0.528096
MYDGF--chr19---	0.372412	0.717743	-0.545302	-0.545302	-0.545302	-0.545302	-0.545302	0.463912	-0.545302	-0.545302	1.38182	-0.545302	2	-0.545302	-0.545302	-0.545302	-0.545302	2	-0.545302	0.508913	1.73503	0.63032	-0.545302	0.445922	-0.545302	0.282006	-0.545302	0.759853	2	-0.545302	-0.545302	-0.545302	-0.545302	-0.545302	0.723972	0.362611	-0.545302	-0.545302	-0.545302	1.09547	-0.545302	-0.545302	-0.545302	2	-0.545302	-0.545302	2	0.480776	-0.545302
MYEOV2--chr2---	-0.51475	-0.51475	-0.51475	1.49474	-0.51475	-0.51475	1.61623	-0.51475	1.15931	0.828153	-0.51475	-0.51475	-0.51475	-0.51475	-0.51475	-0.51475	-0.51475	-0.51475	-0.51475	0.0663122	-0.51475	1.11795	-0.51475	0.0288396	-0.51475	0.319495	-0.51475	-0.51475	-0.51475	2	-0.51475	-0.51475	-0.51475	1.03228	-0.51475	0.400777	-0.51475	-0.51475	-0.51475	-0.51475	-0.51475	-0.51475	0.220296	-0.51475	-0.51475	-0.51475	-0.51475	0.519932	-0.51475
MYH9--chr22---	-0.547562	-0.547562	-0.547562	-0.547562	-0.547562	-0.547562	-0.547562	-0.547562	-0.547562	-0.547562	1.11144	-0.547562	-0.547562	-0.547562	-0.547562	-0.547562	-0.547562	-0.547562	-0.547562	-0.0515051	-0.547562	-0.547562	-0.547562	0.640983	-0.547562	-0.547562	0.448228	-0.547562	-0.547562	-0.547562	-0.547562	-0.547562	-0.547562	-0.547562	-0.547562	-0.125354	-0.547562	-0.547562	0.257436	0.260289	-0.547562	-0.547562	0.079952	-0.547562	-0.547562	-0.547562	-0.547562	-0.547562	-0.547562
MYL12A--chr18--+	-0.224765	-1.11416	-1.11416	0.339472	0.0928986	-1.11416	-1.11416	-0.556115	-1.11416	0.496283	-1.11416	-1.11416	-1.11416	-0.314766	-1.11416	0.455642	-1.11416	1.22983	0.0499904	0.49745	0.146744	-0.218866	-1.11416	-1.11416	-1.11416	-0.656699	-0.0226934	0.0984978	-1.11416	-1.11416	0.397882	-1.11416	-1.11416	-1.11416	-0.412315	-0.233251	-1.11416	-0.463697	-0.597094	-0.595262	-1.11416	0.689596	-0.39131	-1.11416	-0.176698	-1.11416	-1.11416	-0.54679	-0.171651
MYL12B--chr18--+	-0.231795	-0.416798	-1.09329	0.314743	-0.596072	-1.09329	0.0385769	0.158014	-1.09329	1.00532	-1.09329	-1.09329	-1.09329	0.189886	-1.09329	0.427269	-1.09329	1.17718	-0.426303	-0.11894	-0.568683	-0.463622	-1.09329	-0.562386	-1.09329	-0.308247	-1.09329	-1.09329	-1.09329	-1.09329	-0.574606	0.632958	-0.136334	-0.271586	-1.09329	-0.412359	1.56368	-1.09329	-0.592445	-0.214485	-1.09329	0.0206309	-1.09329	-1.09329	-0.185236	-1.09329	0.546314	-1.09329	-1.09329
MYL6--chr12--+	0.117809	-0.417252	-1.70072	-0.254956	-0.484188	-0.781242	0.357542	-0.0495728	-1.70072	-0.111267	0.074768	0.0543016	-0.576289	-0.0147261	-1.70072	-1.70072	-1.70072	0.990299	-0.431473	-0.000657007	-0.91774	-0.626199	0.975829	-0.324645	-0.226473	0.00190566	-1.70072	-0.693289	0.35893	0.74375	-0.444571	0.760647	-1.70072	-0.207664	0.041368	-0.323019	0.578079	-0.780515	-0.477449	-0.474157	-0.69265	-0.745347	-1.10021	-1.70072	-0.439495	-1.70072	-1.70072	-1.70072	-1.70072
MYL9--chr20--+	-0.307613	-0.307613	-0.307613	-0.307613	-0.307613	-0.307613	-0.307613	-0.307613	-0.307613	-0.307613	-0.307613	-0.307613	-0.307613	-0.307613	-0.307613	-0.307613	-0.307613	-0.307613	-0.307613	-0.307613	-0.307613	-0.307613	-0.307613	-0.307613	-0.307613	-0.307613	-0.307613	-0.307613	-0.307613	-0.307613	-0.307613	-0.307613	-0.307613	-0.307613	-0.307613	-0.307613	-0.307613	-0.307613	-0.307613	-0.307613	-0.307613	-0.307613	-0.307613	-0.307613	-0.307613	-0.307613	-0.307613	-0.307613	-0.307613
N4BP2L2--chr13---	-0.58585	0.485354	-0.58585	-0.58585	0.201478	-0.58585	-0.58585	-0.58585	-0.58585	-0.58585	1.04857	-0.58585	-0.58585	0.64026	-0.58585	-0.58585	-0.58585	-0.58585	-0.58585	-0.58585	-0.58585	-0.58585	-0.58585	-0.58585	-0.58585	-0.58585	0.395187	-0.58585	-0.58585	-0.58585	-0.58585	-0.58585	-0.58585	-0.58585	1.22961	-0.58585	-0.58585	-0.58585	-0.58585	-0.58585	-0.58585	-0.58585	-0.58585	-0.58585	0.239865	-0.58585	-0.58585	0.920552	-0.58585
NA--NA--NA	-0.768848	-0.768848	-0.768848	-0.768848	-0.768848	-0.768848	-0.768848	-0.768848	-0.768848	-0.768848	-0.768848	-0.768848	-0.768848	-0.768848	-0.768848	-0.768848	-0.768848	-0.768848	-0.768848	-0.768848	-0.768848	-0.768848	-0.768848	-0.768848	-0.768848	-0.768848	-0.768848	-0.768848	-0.768848	-0.768848	-0.768848	-0.768848	-0.768848	-0.768848	-0.768848	-0.768848	-0.768848	-0.768848	-0.768848	-0.768848	-0.768848	-0.768848	-0.768848	-0.768848	-0.768848	-0.768848	-0.768848	-0.768848	-0.768848
NACA--chr12---	-0.2281	-1.36978	0.69585	-0.479697	-0.715424	-0.719594	0.540342	-0.438661	-1.96642	0.0705284	0.777392	0.576289	-0.810134	-0.232661	-1.96642	0.0281976	-1.96642	0.0360572	0.287551	-1.2755	-0.302364	0.996242	0.458466	-0.00421303	-1.00292	-0.0992131	-0.285685	-1.34989	0.15158	1.36389	-0.899115	0.698984	-1.96642	0.94935	-0.955241	-0.840685	-0.333678	-0.473175	-0.708493	-0.349955	-0.520214	-0.0335007	0.42027	-0.294656	-0.669464	-1.96642	-0.520345	-0.0979162	-1.16124
NAMPT--chr7---	-0.49141	-0.49141	-0.49141	-0.49141	-0.49141	-0.49141	0.733342	-0.49141	-0.49141	-0.49141	1.39578	-0.49141	-0.49141	-0.49141	-0.49141	-0.49141	-0.49141	-0.49141	-0.49141	0.0728786	-0.49141	0.659849	-0.49141	0.860617	0.684566	-0.49141	-0.49141	-0.49141	-0.49141	-0.49141	-0.49141	-0.49141	-0.49141	-0.49141	-0.49141	0.397688	-0.49141	-0.49141	-0.49141	-0.49141	-0.49141	-0.49141	-0.49141	-0.49141	-0.49141	-0.49141	-0.49141	1.24796	-0.49141
NAP1L1--chr12---	-0.642196	0.304932	-0.642196	-0.642196	-0.642196	-0.642196	0.942487	-0.642196	-0.642196	-0.642196	-0.642196	-0.642196	-0.642196	0.441894	-0.642196	-0.642196	-0.642196	-0.642196	-0.642196	-0.642196	-0.642196	-0.155666	-0.642196	-0.237961	-0.642196	-0.642196	-0.642196	-0.642196	-0.642196	-0.642196	-0.642196	-0.642196	-0.642196	-0.642196	0.962985	-0.274422	-0.642196	-0.642196	-0.642196	0.0615	-0.642196	0.917361	-0.642196	-0.642196	-0.642196	-0.642196	-0.642196	-0.642196	-0.642196
NCL--chr2---	-0.158307	-0.762206	-0.762206	0.00729278	-0.151321	0.0111894	1.06217	0.389581	-0.762206	0.114139	-0.762206	1.75187	-0.762206	0.814319	-0.762206	-0.762206	-0.762206	-0.762206	0.0572597	0.43489	0.359417	-0.762206	2	0.146319	-0.762206	0.544449	-0.762206	-0.762206	-0.762206	-0.762206	-0.124947	0.236373	-0.762206	-0.762206	-0.762206	-0.164756	-0.762206	0.555992	-0.146865	-0.762206	0.681859	-0.762206	0.0980346	-0.762206	0.353439	1.22134	-0.762206	-0.0869986	-0.762206
NCOA7--chr6--+	-0.408627	-0.408627	-0.408627	0.717273	0.485196	-0.408627	-0.408627	-0.408627	-0.408627	-0.408627	-0.408627	-0.408627	-0.408627	-0.408627	-0.408627	-0.408627	-0.408627	-0.408627	-0.408627	-0.408627	-0.408627	-0.408627	-0.408627	-0.408627	-0.408627	-0.408627	-0.408627	-0.408627	-0.408627	-0.408627	-0.408627	-0.408627	-0.408627	-0.408627	-0.408627	-0.408627	-0.408627	-0.408627	-0.408627	-0.408627	-0.408627	-0.408627	-0.408627	2	0.528775	-0.408627	-0.408627	-0.408627	-0.408627
NDUFA1--chrX--+	0.615243	-0.876575	1.3432	0.936952	-0.236168	0.504234	-0.0138029	-0.876575	-0.876575	-0.876575	1.23426	-0.876575	-0.876575	0.120733	-0.876575	-0.876575	-0.876575	2	-0.876575	0.596622	-0.200892	-0.0655748	-0.876575	0.311771	0.975569	-0.305859	-0.0786072	0.0237833	-0.876575	2	0.28745	1.34681	0.355969	0.181766	-0.876575	0.421591	-0.876575	-0.876575	-0.231497	0.255311	-0.232026	1.37376	0.884947	-0.876575	0.688845	-0.876575	-0.876575	-0.876575	-0.876575
NDUFA11--chr19---	0.714246	-0.760235	1.43375	1.38568	1.04544	0.0411134	0.680651	-0.0721217	-0.760235	0.147784	-0.760235	-0.760235	0.908735	0.225483	-0.760235	-0.760235	2	-0.760235	-0.760235	-0.0414387	-0.760235	-0.760235	-0.760235	-0.0843876	-0.760235	0.239137	-0.760235	-0.760235	-0.760235	-0.760235	0.7803	2	-0.760235	1.45588	0.699289	-0.141192	1.59644	0.0418378	0.737025	-0.120394	0.354161	0.657806	-0.263226	1.65277	-0.760235	-0.760235	-0.760235	0.854158	-0.760235
NDUFA12--chr12---	0.157196	0.45123	2	0.371468	0.75946	0.376509	0.440693	0.235104	1.67211	-0.624197	1.01667	-0.624197	-0.624197	-0.624197	-0.624197	-0.624197	-0.624197	-0.624197	-0.624197	0.27342	-0.624197	-0.0717609	1.78516	0.219786	0.398284	0.080219	-0.624197	-0.624197	-0.624197	-0.624197	1.29959	1.50243	-0.624197	-0.624197	-0.624197	0.148851	-0.624197	-0.624197	-0.624197	-0.624197	0.171348	-0.624197	-0.624197	-0.624197	-0.624197	-0.624197	-0.624197	-0.624197	0.827122
NDUFA13--chr19--+	0.436492	0.145476	1.64712	1.00212	0.450099	0.0689474	1.32986	0.266192	-0.132325	-1.11084	0.0250426	1.14104	1.09134	1.05247	-1.11084	-1.11084	-1.11084	1.38776	0.831678	-0.0385915	-0.533527	0.267884	1.91483	0.654809	0.471665	0.541673	-0.429044	-1.11084	-1.11084	1.10956	0.740417	2	-1.11084	-0.206576	-0.362708	0.293804	0.926424	-1.11084	1.25018	0.46297	1.08371	1.30097	-0.340317	-1.11084	-0.111549	-1.11084	0.693509	-0.506053	-1.11084
NDUFA2--chr5---	0.656694	-0.681168	-0.681168	0.976362	1.13454	0.296398	0.359098	0.774683	-0.681168	0.426525	-0.681168	2	-0.681168	-0.681168	2	1.68019	-0.681168	-0.681168	-0.681168	0.535395	-0.681168	1.26444	-0.681168	0.751651	0.317669	0.00695905	-0.681168	-0.681168	-0.681168	-0.681168	2	1.39628	-0.681168	0.594901	1.09931	0.884064	2	-0.681168	-0.681168	0.0993753	0.678286	1.0487	-0.681168	-0.681168	0.128633	-0.681168	-0.681168	1.28823	0.73659
NDUFA4--chr7---	0.236672	-0.230004	1.10452	1.06049	-0.860227	0.308245	1.00055	-0.429655	0.0662023	-0.177461	1.00559	1.47309	-1.34651	-1.34651	-1.34651	0.865313	-1.34651	0.874028	0.37983	0.913596	0.66442	0.538235	0.859364	-0.140407	0.0598827	1.05457	0.0187214	-0.197723	-1.34651	2	0.649711	2	-1.34651	0.910204	0.640013	0.845703	0.464032	0.0370838	0.258125	-0.1929	-0.196994	1.40494	0.565875	1.81617	-0.157836	-1.34651	-1.34651	-0.106236	-0.453644
NDUFA6--chr22---	-0.535923	-0.535923	-0.535923	-0.535923	0.372385	-0.535923	0.687772	-0.535923	-0.535923	-0.535923	2	-0.535923	-0.535923	-0.535923	-0.535923	2	-0.535923	-0.535923	0.682517	0.895155	1.13179	-0.535923	-0.535923	0.814937	-0.535923	1.40691	-0.535923	0.741082	-0.535923	-0.535923	0.411599	1.90784	-0.535923	2	0.705975	0.352408	2	-0.535923	-0.535923	-0.535923	-0.535923	1.49897	0.743144	-0.535923	1.68436	-0.535923	-0.535923	1.20195	-0.535923
NDUFA7--chr19---	-0.525898	-0.525898	2	1.30281	-0.525898	-0.525898	2	0.400223	-0.525898	1.52211	2	-0.525898	-0.525898	0.800764	-0.525898	2	-0.525898	-0.525898	-0.525898	0.816303	0.372925	-0.525898	-0.525898	1.58702	-0.525898	0.819141	-0.525898	0.671798	-0.525898	-0.525898	-0.525898	0.866649	-0.525898	-0.525898	-0.525898	-0.0758329	2	-0.525898	1.48924	0.335254	-0.525898	-0.525898	0.673732	-0.525898	-0.525898	-0.525898	-0.525898	-0.525898	-0.525898
NDUFAB1--chr16---	0.0397802	0.316857	-0.696549	0.241694	0.0482984	0.246445	0.999028	-0.696549	-0.696549	-0.696549	2	2	-0.696549	1.22569	-0.696549	-0.696549	-0.696549	-0.696549	-0.696549	-0.23421	0.0893275	0.246713	-0.696549	0.098761	0.266965	0.896645	-0.696549	-0.696549	2	2	0.0804553	1.88943	-0.696549	-0.696549	-0.696549	0.323507	-0.696549	-0.696549	1.44006	-0.696549	-0.696549	-0.696549	-0.696549	-0.696549	-0.696549	-0.696549	-0.696549	-0.696549	-0.696549
NDUFB10--chr16--+	-0.804774	0.074294	1.43477	0.582185	-0.804774	0.0132163	1.1248	0.821239	-0.804774	-0.804774	-0.804774	-0.804774	-0.804774	1.74968	-0.804774	2	2	2	1.11827	-0.804774	-0.123074	0.322123	1.16466	0.156138	0.0310154	0.577225	0.000299721	-0.804774	-0.804774	-0.804774	1.09842	1.43841	-0.804774	0.262992	0.0786292	0.0800628	1.60085	-0.804774	0.333597	-0.804774	0.332765	-0.804774	0.105069	1.65834	0.3752	-0.804774	2	-0.804774	-0.804774
NDUFB11--chrX---	0.369068	0.119461	2	0.646793	0.784215	-0.793256	-0.793256	0.894997	-0.793256	-0.793256	-0.793256	-0.793256	-0.793256	1.85898	-0.793256	2	-0.793256	-0.793256	0.106637	-0.0314465	-0.0854617	0.376777	1.25157	0.204438	-0.793256	0.958611	0.0426346	0.149891	-0.793256	-0.793256	0.839465	1.95209	-0.793256	0.315382	-0.793256	0.125451	-0.793256	-0.793256	-0.793256	-0.115126	-0.118075	1.56402	0.151414	-0.793256	-0.0897071	-0.793256	-0.793256	-0.0517792	-0.793256
NDUFB2--chr7--+	1.22998	-0.958058	-0.958058	2	-0.958058	-0.195049	1.18823	-0.302867	-0.958058	0.490822	1.02843	-0.958058	1.46751	1.4247	-0.958058	1.7832	-0.958058	1.794	-0.149598	1.07573	0.148502	-0.194833	2	0.358203	-0.958058	1.07905	-0.958058	-0.958058	-0.958058	2	-0.329358	1.13435	-0.958058	1.15203	-0.958058	0.0762052	1.28587	-0.958058	0.770749	0.471687	0.769672	0.392138	0.905496	2	-0.958058	-0.958058	-0.958058	0.195057	-0.958058
NDUFB3--chr2--+	-0.610217	-0.610217	-0.610217	1.18754	-0.610217	-0.610217	-0.610217	-0.610217	-0.610217	-0.610217	1.12831	-0.610217	-0.610217	-0.610217	-0.610217	-0.610217	-0.610217	-0.610217	1.2891	1.03092	0.927447	0.450353	1.94254	0.284001	-0.610217	0.712059	0.43331	-0.610217	-0.610217	-0.610217	-0.610217	0.758762	-0.610217	2	1.32089	0.536698	-0.610217	-0.610217	-0.610217	0.236361	-0.610217	1.266	0.0473793	2	-0.610217	-0.610217	-0.610217	-0.610217	-0.610217
NDUFB4--chr3--+	-0.804419	-0.804419	-0.804419	1.03796	-0.153824	0.0192495	0.6766	0.83288	0.359043	0.128891	-0.804419	-0.804419	0.911036	1.76777	-0.804419	-0.804419	-0.804419	-0.804419	0.0683145	-0.400584	0.390113	0.0194831	1.17869	0.163163	-0.804419	-0.224623	-0.804419	0.110263	-0.804419	-0.804419	0.378124	2	-0.804419	-0.804419	-0.804419	0.312069	1.6179	0.0199941	0.734544	-0.146756	-0.804419	1.48172	-0.804419	-0.804419	-0.122104	-0.804419	1.34096	-0.0853209	-0.804419
NDUFB7--chr19---	-0.870763	0.00335338	-0.870763	2	0.639993	-0.870763	0.591762	-0.172316	0.995697	-0.870763	0.462944	-0.870763	0.82327	1.6693	-0.870763	-0.870763	-0.870763	2	0.586289	0.388228	0.308852	0.249787	1.08758	0.532397	1.35029	0.503451	0.932966	1.11331	1.24307	2	0.297012	2	-0.870763	2	0.00766419	0.431586	1.52131	-0.056645	0.648982	0.653374	0.647965	0.568573	0.0339552	-0.870763	-0.870763	1.21534	2	-0.160645	-0.870763
NDUFB8--chr10---	-0.222379	-0.849452	1.34925	0.512213	0.642155	-0.849452	0.594535	-0.159858	-0.849452	-0.849452	-0.849452	1.76109	-0.849452	0.787569	-0.849452	2	-0.849452	2	0.00145895	0.393581	-0.180184	-0.849452	2	-0.17215	0.544239	-0.849452	-0.849452	0.0423582	2	1.7246	-0.18774	2	-0.849452	-0.849452	-0.849452	0.436389	1.5123	-0.849452	-0.210498	-0.208234	0.267342	-0.849452	-0.351373	1.56874	-0.849452	1.21021	-0.849452	-0.849452	0.31524
NDUFB9--chr8--+	0.397131	-0.52278	-0.52278	1.47477	-0.52278	0.655321	-0.52278	0.488849	1.14133	1.71432	-0.52278	-0.52278	-0.52278	-0.52278	-0.52278	-0.52278	-0.52278	-0.52278	2	0.0548294	-0.52278	1.82194	-0.52278	-0.52278	-0.52278	0.946446	-0.52278	-0.52278	2	-0.52278	0.447947	-0.52278	-0.52278	2	-0.52278	0.387306	-0.52278	-0.52278	1.11675	-0.52278	-0.52278	1.56195	-0.52278	-0.52278	0.453142	-0.52278	-0.52278	0.505753	-0.52278
NDUFC1--chr4---	0.0354848	0.315277	1.89903	1.4219	-0.708062	-0.708062	0.305251	-0.708062	0.637009	-0.708062	0.853326	-0.708062	-0.708062	-0.708062	-0.708062	2	-0.708062	-0.708062	0.3009	0.14608	0.0855177	1.18714	-0.708062	0.0950437	0.944497	1.25613	0.229139	0.349395	-0.708062	-0.708062	0.0765586	2	-0.708062	1.92533	-0.708062	0.321993	-0.708062	0.245037	0.0495729	-0.708062	-0.708062	-0.708062	0.739542	-0.708062	-0.708062	-0.708062	-0.708062	0.731029	0.672963
NDUFC2--chr11---	0.30582	0.682927	1.46623	0.582939	0.317783	-0.853967	-0.853967	1.18006	-0.853967	-0.853967	-0.853967	1.90083	-0.853967	0.87351	-0.853967	1.19309	-0.853967	-0.853967	-0.853967	1.40489	0.790278	-0.00627881	2	0.141549	-0.853967	0.202897	-0.853967	-0.853967	-0.853967	-0.853967	1.11777	2	-0.853967	0.963915	-0.853967	-0.199312	1.63829	0.590449	0.729427	-0.177317	1.8307	-0.853967	0.987242	-0.853967	-0.151954	-0.853967	2	-0.114109	0.375082
NDUFC2-KCTD14--chr11---	1.09209	-0.530378	-0.530378	0.649172	0.406037	-0.530378	-0.530378	0.487624	-0.530378	-0.530378	-0.530378	-0.530378	-0.530378	-0.530378	-0.530378	-0.530378	-0.530378	2	-0.530378	0.533017	-0.530378	0.124086	-0.530378	0.469478	1.52704	-0.530378	-0.530378	-0.530378	-0.530378	2	1.17168	-0.530378	-0.530378	-0.530378	-0.530378	-0.530378	-0.530378	0.656217	-0.530378	1.12469	0.412094	-0.530378	0.788269	-0.530378	-0.530378	-0.530378	-0.530378	-0.530378	1.18898
NDUFS2--chr1--+	0.395116	-0.518268	-0.518268	-0.518268	-0.518268	-0.518268	-0.518268	-0.518268	-0.518268	-0.518268	-0.518268	-0.518268	-0.518268	-0.518268	-0.518268	-0.518268	-0.518268	-0.518268	1.57715	0.937456	0.456577	0.127485	2	0.855856	0.676928	0.940534	-0.518268	-0.518268	-0.518268	-0.518268	-0.518268	1.96758	-0.518268	-0.518268	-0.518268	0.385362	-0.518268	-0.518268	1.10963	-0.518268	0.411659	-0.518268	0.782827	2	-0.518268	-0.518268	-0.518268	1.24953	-0.518268
NDUFS4--chr5--+	-0.545067	-0.545067	2	0.598457	0.362747	-0.545067	2	1.16656	-0.545067	-0.545067	1.33947	-0.545067	-0.545067	-0.545067	-0.545067	-0.545067	-0.545067	-0.545067	-0.545067	-0.545067	-0.545067	-0.545067	2	0.805059	-0.545067	0.888258	-0.545067	-0.545067	-0.545067	2	-0.545067	0.938884	-0.545067	0.955193	-0.545067	0.69817	-0.545067	-0.545067	-0.545067	-0.545067	0.368619	-0.545067	-0.545067	-0.545067	0.407008	-0.545067	-0.545067	-0.545067	-0.545067
NDUFS5--chr1--+	-0.416511	-0.950462	-0.950462	0.208992	-0.950462	0.585235	0.973058	-0.363275	-0.950462	-0.175623	0.170791	-0.950462	-0.950462	0.443457	-0.950462	2	-0.950462	1.51596	-0.225914	-0.615196	-0.380582	-0.00841093	0.695926	-0.373741	0.236262	0.460053	-0.950462	0.325529	-0.950462	-0.950462	0.0312919	2	-0.950462	-0.057843	-0.211964	0.296751	2	-0.950462	0.327194	0.603077	-0.406841	-0.950462	-0.526349	-0.950462	0.369833	-0.950462	0.830647	0.427147	-0.950462
NDUFS6--chr5--+	0.405802	0.147266	-0.798102	1.16957	1.74439	-0.798102	0.138003	1.31329	0.444483	0.198679	1.49215	-0.798102	-0.798102	-0.798102	-0.798102	-0.798102	-0.798102	-0.798102	-0.798102	0.563512	1.26626	0.952694	2	-0.394618	0.100723	1.01643	-0.798102	0.178784	1.48803	2	-0.0732644	2	-0.798102	1.08893	0.151928	0.985609	-0.798102	-0.798102	0.426126	0.429991	0.844421	1.64351	0.180362	1.85078	0.470867	-0.798102	-0.798102	0.974104	-0.798102
NDUFS7--chr19--+	-0.554951	-0.554951	2	0.563405	0.332884	-0.554951	-0.554951	-0.554951	-0.554951	-0.554951	-0.554951	-0.554951	-0.554951	0.827677	-0.554951	2	-0.554951	2	-0.554951	0.453276	-0.554951	0.0655599	-0.554951	-0.0393974	0.593527	0.236268	-0.554951	-0.554951	-0.554951	2	0.371214	1.83373	-0.554951	-0.554951	-0.554951	0.660924	-0.554951	-0.554951	-0.554951	-0.554951	0.338626	-0.554951	-0.554951	2	-0.554951	-0.554951	-0.554951	-0.554951	-0.554951
NDUFS8--chr11--+	-0.518117	-0.518117	-0.518117	-0.518117	0.365421	-0.518117	-0.518117	-0.518117	-0.518117	-0.518117	2	-0.518117	-0.518117	-0.518117	-0.518117	-0.518117	-0.518117	-0.518117	-0.518117	-0.518117	-0.518117	0.60078	2	-0.00505813	-0.518117	1.7892	-0.518117	-0.518117	-0.518117	2	-0.518117	2	-0.518117	-0.518117	-0.518117	-0.518117	-0.518117	-0.518117	-0.518117	0.37502	0.371136	-0.518117	0.175645	2	-0.518117	-0.518117	-0.518117	-0.518117	1.10415
NDUFV2--chr18--+	0.656248	-0.902029	1.41664	0.533931	0.268949	-0.902029	-0.902029	0.78143	1.04132	-0.902029	0.48662	2	-0.902029	1.33509	-0.902029	-0.902029	-0.902029	-0.902029	-0.00469077	0.408826	-0.196244	0.540653	1.13699	-0.513586	-0.0367111	1.11821	0.520327	-0.902029	-0.902029	1.81247	0.313853	1.4204	0.385424	0.914656	-0.902029	0.974204	1.58858	-0.0543735	1.01683	0.280283	1.01564	0.5966	0.039959	-0.902029	-0.902029	-0.902029	-0.902029	-0.162658	0.32621
NEAT1--chr11--+	-0.852915	-0.0863964	-0.852915	1.32265	0.996496	-0.139654	-0.852915	-0.240442	-0.852915	0.914609	0.316622	1.46568	-0.852915	-0.852915	-0.852915	-0.852915	-0.852915	-0.852915	0.424784	1.04827	0.530975	0.129703	-0.852915	0.544427	-0.124134	0.352143	-0.852915	0.886934	-0.852915	-0.852915	0.806609	-0.852915	-0.852915	0.0781419	0.446172	0.289124	-0.852915	0.362788	1.57805	-0.852915	0.138982	-0.852915	-0.410539	1.29484	1.64004	-0.852915	1.00489	-0.230208	-0.852915
NEDD8--chr14---	0.424601	-0.75711	-0.75711	-0.75711	-0.0750788	-0.75711	0.795471	-0.75711	-0.75711	-0.75711	-0.75711	-0.75711	-0.75711	0.30502	-0.75711	-0.75711	-0.75711	-0.75711	-0.75711	0.579405	0.918216	0.432439	1.32182	0.508475	0.741393	0.319732	1.15769	-0.75711	-0.75711	-0.75711	0.902845	0.357767	-0.75711	0.37002	0.175407	-0.396787	-0.75711	-0.75711	-0.0701038	0.448345	-0.0706671	-0.75711	0.856371	-0.75711	-0.0418261	-0.75711	-0.75711	0.547826	-0.75711
NFKBIA--chr14---	-0.571575	-0.571575	-0.571575	-0.571575	-0.571575	-0.571575	-0.571575	-0.571575	-0.571575	-0.571575	-0.571575	-0.571575	-0.571575	-0.571575	-0.571575	-0.571575	-0.571575	-0.571575	-0.571575	-0.130679	0.177854	-0.075142	-0.571575	0.18685	-0.571575	-0.571575	-0.571575	0.42705	-0.571575	-0.571575	-0.571575	-0.571575	-0.571575	-0.571575	0.399596	-0.571575	-0.571575	-0.571575	0.143908	-0.571575	0.143322	-0.571575	-0.0138394	-0.571575	-0.571575	-0.571575	-0.571575	-0.571575	-0.571575
NKG7--chr19---	-0.313253	-0.313253	-0.313253	-0.313253	-0.313253	-0.313253	-0.313253	-0.313253	-0.313253	-0.313253	-0.313253	-0.313253	-0.313253	-0.313253	-0.313253	-0.313253	-0.313253	-0.313253	-0.313253	-0.313253	-0.313253	-0.313253	-0.313253	0.0304205	-0.313253	-0.313253	-0.313253	-0.313253	-0.313253	-0.313253	-0.313253	-0.313253	-0.313253	-0.313253	-0.313253	-0.313253	-0.313253	-0.313253	-0.313253	-0.313253	-0.313253	-0.313253	-0.313253	-0.313253	-0.313253	-0.313253	-0.313253	-0.313253	-0.313253
NME2--chr17--+	0.402592	-1.01602	0.72282	-0.384109	-1.01602	-1.01602	0.125956	-0.470653	-0.118904	-0.296368	1.68667	1.04852	0.306723	0.967323	-1.01602	1.76457	-1.01602	1.27472	-0.343076	0.291652	-0.486728	0.0658926	1.75794	0.602746	0.434838	1.11998	0.05065	0.169088	-1.01602	-1.01602	0.681232	1.03696	-1.01602	1.31204	-1.01602	0.14236	1.66467	-1.01602	0.422995	-0.508911	0.422098	-1.01602	-0.309592	-1.01602	-1.01602	-1.01602	0.638227	-0.0561955	-0.0949239
NME3--chr16---	-0.429987	-0.429987	-0.429987	-0.429987	-0.429987	0.741071	-0.429987	-0.429987	1.22418	-0.429987	-0.429987	-0.429987	-0.429987	-0.429987	-0.429987	-0.429987	-0.429987	-0.429987	-0.429987	0.144169	-0.429987	0.216491	-0.429987	0.107142	-0.429987	-0.429987	-0.429987	-0.429987	-0.429987	-0.429987	-0.429987	-0.429987	-0.429987	-0.429987	-0.429987	0.474658	-0.429987	-0.429987	-0.429987	-0.429987	-0.429987	-0.429987	-0.429987	2	-0.429987	-0.429987	-0.429987	-0.429987	-0.429987
NNMT--chr11--+	1.3308	1.30722	2	0.81284	0.384517	0.819316	1.29334	0.890678	0.694275	0.820051	0.224145	1.32956	0.964878	0.245441	-1.23199	1.2167	-1.23199	0.785325	1.2873	0.608403	0.444397	1.02751	2	1.1814	0.505512	1.03613	0.798959	0.390772	0.901704	0.560712	0.262674	2	-0.381732	-0.0322191	0.102776	1.70851	1.59258	-0.672181	0.540791	0.91127	1.00848	0.320378	0.705767	1.98651	1.33149	-1.23199	0.224802	0.127227	1.16564
NOP10--chr15---	0.255794	-0.587939	-0.587939	-0.587939	-0.587939	-0.587939	-0.587939	-0.587939	-0.587939	-0.587939	2	-0.587939	-0.587939	0.74121	-0.587939	-0.587939	-0.587939	-0.587939	-0.587939	0.756777	-0.587939	0.00857122	2	0.323378	-0.587939	0.172676	-0.587939	-0.587939	-0.587939	-0.587939	0.302402	1.70835	-0.587939	0.822551	-0.587939	0.580907	-0.587939	-0.587939	-0.587939	0.274827	-0.587939	1.32416	0.0822319	2	0.307167	-0.587939	2	1.04506	-0.587939
NPC2--chr14---	0.743033	-0.544769	-0.544769	-0.544769	-0.544769	-0.544769	-0.544769	-0.544769	-0.544769	-0.544769	-0.544769	-0.544769	-0.544769	0.612715	-0.544769	-0.544769	-0.544769	-0.544769	-0.544769	-0.0834139	-0.544769	-0.544769	1.7208	-0.544769	-0.544769	-0.544769	-0.544769	0.500195	-0.544769	-0.544769	-0.544769	-0.544769	-0.544769	-0.544769	-0.544769	-0.152097	-0.544769	-0.544769	-0.544769	-0.544769	-0.544769	-0.544769	-0.544769	-0.544769	-0.544769	-0.544769	-0.544769	-0.544769	-0.544769
NPM1--chr5--+	-1.06765	-0.378156	0.688924	-0.429294	-0.560875	-0.426062	-0.384911	0.472268	-0.161384	0.522258	-1.06765	-1.06765	-1.06765	0.24019	-1.06765	-1.06765	1.8739	-1.06765	-1.06765	0.0981344	-0.53296	-0.42588	-1.06765	0.0391467	0.0457906	0.25576	-1.06765	0.497364	-1.06765	0.988798	-1.06765	-1.06765	-1.06765	-1.06765	-0.374756	-0.799915	-1.06765	-0.425482	-1.06765	-0.555369	0.385135	-1.06765	-1.06765	1.69307	-0.536167	-1.06765	0.603468	-0.0980366	-0.13716
NR4A1--chr12--+	-0.463803	-0.463803	-0.463803	-0.463803	-0.463803	-0.463803	-0.463803	-0.463803	-0.463803	-0.463803	-0.463803	-0.463803	-0.463803	-0.463803	-0.463803	-0.463803	-0.463803	-0.463803	-0.463803	-0.463803	-0.463803	-0.463803	-0.463803	-0.463803	-0.463803	-0.463803	-0.463803	-0.463803	-0.463803	-0.463803	-0.463803	-0.463803	-0.463803	-0.463803	-0.463803	-0.463803	-0.463803	-0.463803	-0.463803	-0.463803	-0.463803	2	-0.463803	-0.463803	-0.463803	-0.463803	-0.463803	-0.463803	-0.463803
NSA2--chr5--+	-0.507473	-0.507473	-0.507473	0.679467	1.142	-0.507473	0.761992	0.516907	-0.507473	-0.507473	-0.507473	-0.507473	-0.507473	1.92429	-0.507473	-0.507473	-0.507473	-0.507473	-0.507473	-0.507473	-0.507473	-0.507473	-0.507473	-0.507473	-0.507473	-0.507473	0.66664	-0.507473	-0.507473	-0.507473	1.20525	-0.507473	-0.507473	1.04975	-0.507473	0.782966	-0.507473	-0.507473	-0.507473	0.445046	0.440904	1.60353	0.232415	-0.507473	-0.507473	-0.507473	-0.507473	0.534024	-0.507473
NUCKS1--chr1---	-0.246873	-0.842978	-0.842978	0.864621	-0.239977	-0.842978	-0.0305999	0.674546	-0.842978	-0.842978	1.66759	-0.842978	-0.842978	-0.842978	-0.842978	-0.842978	-0.842978	-0.842978	0.524562	0.54417	0.264169	0.676411	-0.842978	0.473981	-0.0629528	0.109085	0.849941	0.00479083	-0.842978	-0.842978	1.19715	0.142713	-0.842978	-0.842978	-0.0185157	1.10511	1.40214	0.458207	0.219441	-0.233426	-0.842978	-0.842978	0.317573	-0.842978	0.631006	-0.842978	1.14546	-0.176485	-0.842978
NUDC--chr1--+	-0.579357	-0.579357	-0.579357	-0.579357	0.269782	0.495674	0.564625	-0.579357	-0.579357	0.638775	-0.579357	-0.579357	-0.579357	0.743011	-0.579357	-0.579357	-0.579357	-0.579357	-0.579357	-0.0522824	0.316556	-0.579357	-0.579357	0.327311	1.2863	-0.579357	-0.579357	0.614462	2	-0.579357	0.306442	-0.579357	-0.579357	1.72672	-0.579357	0.251107	-0.579357	-0.579357	0.275976	0.921453	-0.579357	-0.579357	0.0873945	-0.579357	-0.579357	-0.579357	-0.579357	1.04531	-0.579357
NUPR1--chr16---	0.576116	0.975949	1.80646	2	-0.653565	-0.653565	1.8739	0.684564	-0.653565	0.364559	2	2	-0.653565	0.45168	-0.653565	1.51685	-0.653565	-0.653565	0.955996	0.152392	0.649519	1.13472	-0.653565	0.401946	0.264505	1.19982	1.33896	0.344238	-0.653565	2	1.43699	1.81045	-0.653565	1.83127	0.316807	-0.278615	-0.653565	-0.653565	0.596876	-0.653565	0.060743	-0.653565	0.345849	2	-0.653565	-0.653565	1.68678	0.130881	-0.653565
OAZ1--chr19--+	-0.214624	-0.404162	-1.09723	0.869867	-1.09723	0.00111281	1.36142	-0.543447	-1.09723	-0.36647	-0.0397612	0.999193	-1.09723	1.5896	2	1.21976	-1.09723	-1.09723	0.418922	-0.0990024	-0.55977	-0.452134	0.455502	0.0153073	-0.438284	-1.09723	-1.09723	0.106175	-1.09723	0.96989	-0.565838	0.273293	-1.09723	0.286193	-1.09723	0.0790334	1.62486	0.00198177	-1.09723	-0.582296	-0.200379	0.692766	0.776124	0.844724	-1.09723	-1.09723	-1.09723	-0.534194	-1.09723
OCIAD2--chr4---	0.176687	-0.598009	-0.598009	0.389122	0.185649	-0.598009	0.457755	-0.598009	-0.598009	-0.598009	1.02879	-0.598009	-0.598009	0.622384	-0.598009	-0.598009	-0.598009	-0.598009	0.453221	0.636678	-0.598009	0.394402	1.79069	1.55712	-0.598009	1.0782	0.378454	0.503748	1.98035	-0.598009	0.219482	1.51039	0.91024	0.69707	-0.598009	0.475198	-0.598009	-0.598009	-0.598009	-0.598009	0.190718	1.15763	-0.598009	-0.598009	-0.598009	-0.598009	-0.598009	-0.598009	-0.598009
ORM1--chr9--+	2	0.907198	1.05819	0.567581	0.630245	1.11772	0.639664	1.17095	0.705355	0.458816	0.527395	2	2	0.208815	0.0987308	1.41628	-1.41809	2	1.90675	1.92228	1.37314	0.958831	2	1.75573	0.665919	1.07896	1.05683	0.22892	1.52834	1.87576	0.564622	1.91723	-0.778392	0.791867	0.792418	1.61942	1.61512	0.573896	0.52899	1.24392	1.3465	0.619823	0.390861	1.96219	1.55685	0.169931	1.63253	-0.0018888	0.736426
ORM1-ORM2--chr9--+	2	0.969867	1.64792	0.459524	0.767653	1.22459	0.694363	0.959886	1.14928	0.526479	0.141888	2	2	0.548391	-1.312	1.91115	0.758481	1.94443	2	1.98528	1.32445	0.873482	1.98595	1.61398	0.893319	0.864718	0.797782	0.508038	1.74738	1.81892	0.943965	1.75257	-1.312	0.482306	0.852122	1.57856	1.69692	0.844253	0.722232	1.40981	1.37025	0.453043	0.233238	1.77821	1.33228	-0.0226566	1.92116	0.657453	1.23896
ORM2--chr9--+	2	0.804647	2	-0.14677	0.933093	1.32253	0.570244	0.739627	1.23319	0.638716	1.08439	2	1.6684	0.961609	-1.1647	1.49132	-1.1647	2	1.85686	2	1.36028	0.0587497	2	1.79506	0.931948	1.07748	0.602945	-0.0546182	1.20953	2	0.520269	2	-0.472873	0.093824	0.303737	1.65968	0.756138	0.820805	0.736753	1.3108	1.34929	0.667468	-0.314326	2	1.30776	0.00246571	2	-0.0587513	1.05304
OST4--chr2---	-0.841207	-0.841207	1.37674	1.89064	-0.841207	-0.0311069	1.06975	-0.145579	-0.841207	0.697095	1.26788	-0.841207	-0.841207	1.29873	-0.841207	-0.841207	-0.841207	2	-0.841207	-0.114561	-0.166083	0.274821	-0.841207	0.346157	-0.841207	0.16908	-0.841207	-0.841207	-0.841207	-0.841207	0.321856	0.880355	0.390318	0.21626	0.0336751	-0.215403	2	-0.841207	-0.841207	-0.841207	-0.841207	-0.841207	0.672551	-0.841207	-0.841207	-0.841207	-0.841207	-0.133955	-0.841207
OSTC--chr4--+	-0.473027	-0.473027	-0.473027	-0.473027	0.3871	-0.473027	-0.473027	0.462041	-0.473027	-0.473027	-0.473027	-0.473027	-0.473027	1.74672	-0.473027	-0.473027	-0.473027	-0.473027	0.680781	-0.473027	1.10622	0.128119	-0.473027	0.445373	-0.473027	0.2935	-0.473027	-0.473027	-0.473027	-0.473027	-0.473027	0.932973	-0.473027	-0.473027	-0.473027	-0.0186136	-0.473027	-0.473027	-0.473027	-0.473027	1.04131	-0.473027	0.202352	-0.473027	-0.473027	-0.473027	-0.473027	-0.473027	-0.473027
P4HB--chr17---	0.213566	-0.616946	-0.616946	1.76213	-0.616946	-0.616946	1.89203	-0.616946	-0.616946	0.588246	1.12706	-0.616946	-0.616946	-0.616946	-0.616946	-0.616946	-0.616946	-0.616946	2	-0.616946	0.925565	2	1.94386	2	-0.616946	0.13175	-0.616946	-0.616946	-0.616946	-0.616946	1.85773	-0.616946	-0.616946	-0.616946	-0.616946	1.32298	-0.616946	1.77341	1.79296	0.867922	0.862167	1.26519	0.99997	-0.616946	1.86773	-0.616946	-0.616946	1.5258	-0.616946
PABPC1--chr8---	1.00819	-0.799588	-0.799588	0.00567179	0.319467	0.00974946	-0.799588	-0.104614	-0.799588	-0.799588	2	-0.799588	-0.799588	0.195957	-0.799588	-0.799588	-0.799588	-0.799588	0.0579608	-0.799588	-0.799588	0.579123	-0.799588	-0.799588	0.0273602	1.13107	-0.799588	1.17462	-0.799588	-0.799588	-0.799588	0.920352	-0.799588	0.936542	0.674486	0.297474	-0.799588	-0.799588	0.326741	-0.799588	-0.799588	-0.799588	0.100631	-0.799588	-0.129145	-0.799588	-0.799588	0.423542	0.374189
PARK7--chr1--+	0.0761412	-0.974104	-0.974104	-0.974104	0.0869739	0.332853	0.405752	0.551357	-0.974104	-0.974104	-0.974104	-0.974104	-0.974104	-0.0301371	-0.974104	0.879607	-0.974104	1.79382	1.47007	0.605964	-0.33456	0.74971	0.873545	-0.0726143	-0.974104	-0.433912	-0.218816	-0.974104	-0.974104	1.48563	-0.34178	2	-0.974104	-0.974104	-0.14533	0.581946	1.28275	-0.974104	0.0938713	-0.361364	0.458778	0.383874	0.693203	2	-0.974104	-0.974104	1.02473	0.185657	-0.974104
PCBD1--chr10---	0.918586	0.246397	2	2	1.57985	0.798332	0.881765	1.41058	0.543146	0.29773	2	-0.697481	1.13175	0.38289	2	-0.697481	-0.697481	-0.697481	1.76537	1.30387	0.576277	0.798703	1.41715	0.334275	2	-0.697481	-0.697481	-0.697481	2	2	1.34603	2	-0.697481	1.73143	0.251052	1.40124	-0.697481	-0.697481	0.943552	0.00380086	0.523925	-0.697481	1.44765	-0.697481	-0.697481	-0.697481	-0.697481	1.07193	0.576308
PCBP2--chr12--+	1.39396	-0.584778	-0.584778	1.82067	-0.584778	-0.584778	0.559595	1.01677	0.934262	0.633771	-0.584778	-0.584778	-0.584778	-0.584778	-0.584778	-0.584778	-0.584778	-0.584778	1.34164	-0.584778	-0.584778	0.490925	-0.584778	-0.0915254	-0.584778	0.172215	-0.584778	-0.584778	-0.584778	-0.584778	1.4826	0.803736	1.05006	0.818996	-0.584778	0.578503	-0.584778	-0.584778	0.91182	0.27388	-0.584778	-0.584778	0.0822019	-0.584778	-0.584778	-0.584778	-0.584778	-0.584778	-0.584778
PCK1--chr20--+	1.26368	1.98201	1.16738	1.84873	1.28045	1.13027	-0.0746068	0.610808	0.838525	2	0.352493	2	0.68122	0.0485261	-0.864253	-0.864253	-0.864253	-0.864253	1.7429	1.57749	0.575499	0.802608	0.922351	1.57831	2	1.1169	0.382027	0.520409	-0.864253	-0.864253	1.72073	-0.864253	-0.864253	0.727541	0.487272	1.44289	-0.864253	1.13159	0.81707	2	0.167682	0.448858	1.5787	-0.864253	1.55017	-0.864253	1.06854	0.630681	-0.864253
PDCD5--chr19--+	1.06066	-0.521147	-0.521147	0.628848	-0.521147	-0.521147	0.708804	0.471347	-0.521147	-0.521147	1.37405	2	-0.521147	0.900595	-0.521147	2	-0.521147	-0.521147	-0.521147	0.917247	-0.521147	1.4478	-0.521147	-0.521147	0.659821	0.920289	-0.521147	-0.521147	-0.521147	2	-0.521147	-0.521147	-0.521147	-0.521147	-0.521147	1.32949	-0.521147	-0.521147	1.08737	-0.521147	0.39771	-0.521147	-0.521147	2	1.14615	-0.521147	-0.521147	0.487932	1.15513
PDIA3--chr15--+	2	-0.566675	-0.566675	-0.566675	0.349562	0.593302	0.667702	-0.566675	-0.566675	-0.566675	1.33534	-0.566675	-0.566675	-0.566675	-0.566675	-0.566675	-0.566675	-0.566675	0.662401	-0.566675	0.400032	-0.566675	-0.566675	1.1335	0.618543	0.879948	-0.566675	0.721477	-0.566675	-0.566675	0.389118	-0.566675	-0.566675	-0.566675	-0.566675	0.688096	-0.566675	-0.566675	-0.566675	0.359516	0.355488	1.48598	0.152762	-0.566675	-0.566675	-0.566675	-0.566675	0.446035	-0.566675
PDIA6--chr2---	1.08815	-0.521766	-0.521766	-0.521766	-0.521766	-0.521766	0.730038	-0.521766	-0.521766	-0.521766	-0.521766	2	-0.521766	1.87617	-0.521766	-0.521766	-0.521766	-0.521766	-0.521766	0.0549864	1.18425	-0.521766	-0.521766	0.0177917	0.680185	0.306292	-0.521766	-0.521766	-0.521766	-0.521766	1.16713	-0.521766	-0.521766	-0.521766	-0.521766	0.38697	-0.521766	-0.521766	-0.521766	-0.521766	0.413416	1.55987	-0.521766	-0.521766	-0.521766	-0.521766	-0.521766	-0.521766	-0.521766
PDLIM1--chr10---	0.348963	-0.529923	-0.529923	-0.529923	-0.529923	0.595639	-0.529923	-0.529923	-0.529923	-0.529923	-0.529923	-0.529923	-0.529923	-0.529923	-0.529923	-0.529923	-0.529923	-0.529923	-0.529923	-0.529923	0.408102	0.0914394	-0.529923	-0.529923	-0.529923	0.262381	-0.529923	0.720011	-0.529923	-0.529923	-0.529923	0.92336	-0.529923	0.939333	-0.529923	-0.529923	-0.529923	-0.529923	-0.529923	-0.529923	0.364881	1.46184	-0.529923	-0.529923	-0.529923	-0.529923	-0.529923	-0.529923	-0.529923
PEBP1--chr12--+	1.56269	0.0288731	0.253474	0.447999	0.91992	0.454637	0.0174402	0.774208	-0.0225665	0.624693	1.4279	0.572905	-0.154608	0.493268	0.793381	0.78593	-1.45187	1.65277	1.22176	0.509499	0.415067	0.991234	1.26865	1.56074	0.685435	0.977413	1.11001	-0.760169	0.924355	1.89572	0.854353	1.91624	-0.504968	1.04838	0.557983	0.484734	1.17719	0.223432	0.930061	0.526971	1.04327	-0.349651	1.07188	-1.45187	0.407494	0.145632	0.170511	0.474358	-1.45187
PFDN2--chr1---	-0.611058	-0.611058	-0.611058	-0.611058	0.181807	-0.611058	0.457109	-0.611058	-0.611058	-0.611058	1.03485	-0.611058	-0.611058	0.623673	-0.611058	-0.611058	-0.611058	2	-0.611058	-0.611058	-0.611058	-0.0569219	1.80571	-0.611058	-0.611058	0.0955254	-0.611058	-0.611058	-0.611058	-0.611058	-0.611058	2	-0.611058	-0.611058	-0.611058	-0.611058	-0.611058	-0.611058	-0.611058	-0.611058	0.186935	-0.611058	0.0115062	-0.611058	0.220463	-0.611058	2	0.26529	-0.611058
PFDN5--chr12--+	0.146717	-1.36237	0.973951	0.427562	-0.272406	-0.362949	0.0219168	0.0461266	0.361594	-0.697426	0.165441	-1.36237	-0.140176	-0.640526	-1.36237	0.0551517	1.32814	0.754247	-1.36237	-0.296079	-0.223783	0.790294	1.20073	0.324232	-0.343956	-0.630527	-0.376785	-0.710698	-1.36237	-1.36237	-0.23423	0.246903	-1.36237	-0.103544	-0.293555	-0.422766	1.60124	-1.36237	-0.545697	-1.36237	-0.266654	-0.323934	0.670772	0.404683	-0.229329	0.142691	-1.36237	0.0637512	-1.36237
PFN1--chr17---	1.18572	-0.613511	-0.613511	1.04449	0.738535	-0.613511	1.14473	-0.613511	0.76773	-0.613511	1.9323	-0.613511	-0.613511	-0.613511	-0.613511	1.74852	-0.613511	-0.613511	-0.613511	-0.134085	0.201409	0.36461	-0.613511	-0.165003	-0.613511	0.0748121	-0.613511	-0.613511	-0.613511	2	0.192209	2	-0.613511	-0.613511	-0.613511	-0.613511	-0.613511	-0.613511	-0.613511	-0.613511	-0.613511	-0.613511	0.474136	-0.613511	0.797057	-0.613511	1.93345	0.240189	-0.613511
PGK1--chrX--+	-0.510829	-0.510829	-0.510829	0.674993	-0.510829	-0.510829	0.75744	0.512586	-0.510829	-0.510829	1.44342	-0.510829	-0.510829	0.955207	-0.510829	-0.510829	-0.510829	-0.510829	-0.510829	-0.510829	-0.510829	0.147115	-0.510829	0.0358258	-0.510829	0.328121	1.49085	-0.510829	-0.510829	-0.510829	-0.510829	-0.510829	-0.510829	-0.510829	-0.510829	-0.0134818	-0.510829	-0.510829	-0.510829	-0.510829	-0.510829	-0.510829	0.81483	-0.510829	-0.510829	-0.510829	-0.510829	-0.510829	-0.510829
PHB2--chr12---	1.06751	-0.579407	-0.579407	0.61792	0.37112	-0.579407	1.58438	1.21275	1.12043	-0.579407	-0.579407	-0.579407	-0.579407	-0.579407	-0.579407	-0.579407	-0.579407	-0.579407	1.57629	0.500014	0.423479	1.47058	-0.579407	0.834243	-0.579407	0.267682	-0.579407	0.756955	-0.579407	-0.579407	0.412157	2	-0.579407	-0.579407	-0.579407	-0.0772345	-0.579407	-0.579407	0.378054	-0.579407	-0.579407	-0.579407	-0.579407	-0.579407	0.417464	-0.579407	2	-0.579407	-0.579407
PHYH--chr10---	0.883603	-0.583312	2	-0.583312	-0.583312	-0.583312	-0.583312	2	0.930736	-0.583312	-0.583312	-0.583312	-0.583312	-0.583312	2	-0.583312	-0.583312	-0.583312	0.552402	1.3643	-0.583312	0.893332	1.99736	1.74502	0.511875	0.171194	-0.583312	-0.583312	-0.583312	2	1.91056	2	-0.583312	0.815849	0.574267	0.869607	2	0.489521	0.269502	0.913078	0.907277	-0.583312	0.0814759	-0.583312	0.304605	-0.583312	-0.583312	0.352472	-0.583312
PLA2G16--chr11---	-0.590109	0.592116	-0.590109	-0.590109	-0.590109	0.509975	0.580533	0.354527	0.9638	-0.590109	1.2137	-0.590109	1.70104	0.763076	-0.590109	-0.590109	-0.590109	-0.590109	-0.590109	0.778925	1.0053	0.510287	-0.590109	1.02228	-0.590109	0.184261	1.25749	1.46264	-0.590109	2	1.96943	-0.590109	1.08225	-0.590109	-0.590109	1.17129	-0.590109	-0.590109	0.285158	-0.590109	1.90088	-0.590109	0.0921811	2	0.321184	-0.590109	2	-0.590109	-0.590109
PLA2G2A--chr1---	2	2	1.7241	2	-0.229959	0.661486	0.387359	-0.713596	-0.713596	1.08902	0.290388	2	1.69143	0.0395731	-0.713596	0.765436	2	-0.713596	0.72587	1.38305	1.2864	0.505029	0.7606	2	-0.713596	2	-0.110969	-0.0336435	0.877647	1.24897	2	2	-0.713596	0.0856657	0.401599	2	-0.713596	1.1617	-0.226432	1.63274	0.137894	0.369903	0.930263	2	0.928918	2	-0.713596	0.519931	1.69218
PLG--chr6--+	1.22194	1.19829	0.409522	1.22441	0.790377	1.09796	1.44313	1.02444	1.88161	0.951001	0.729811	0.707765	1.10159	0.00277053	-1.18271	1.36344	-1.18271	2	1.65476	1.46079	1.21017	1.16672	-1.18271	1.11816	1.38417	1.26042	0.362235	0.235884	1.0359	0.68134	0.702995	1.96199	0.6238	1.1517	1.34107	1.29959	1.27197	0.951443	1.24719	1.51321	1.42542	-0.153598	1.09581	0.568471	1.9769	-1.18271	1.50693	0.917073	1.65139
PLGLB1--chr2--+	0.672808	0.386806	2	2	0.109662	0.998341	1.63656	0.790262	-0.658996	-0.658996	2	-0.658996	-0.658996	1.3247	-0.658996	-0.658996	-0.658996	-0.658996	0.372112	0.552058	1.22912	0.314419	-0.658996	1.01976	1.02984	0.0260153	-0.658996	-0.658996	-0.658996	2	0.142847	2	-0.658996	0.611294	1.11342	1.11592	2	0.999652	0.115269	1.88386	1.54455	2	1.15942	2	1.21992	-0.658996	1.87571	0.190597	2
PLIN2--chr9---	1.97152	0.0938031	-0.710311	0.963358	-0.119292	1.57993	0.0859247	-0.067798	2	0.137535	1.23774	-0.710311	1.66832	-0.710311	-0.710311	-0.710311	-0.710311	-0.710311	1.38786	2	-0.0867364	-0.297246	-0.710311	2	0.0542147	1.28738	-0.710311	0.685906	-0.710311	-0.710311	0.363945	1.34161	-0.710311	0.894767	1.70408	-0.132291	-0.710311	1.30219	0.330997	0.989605	-0.710311	-0.710311	0.42718	1.54278	0.369053	-0.710311	-0.710311	-0.710311	-0.710311
PNISR--chr6---	-0.6364	-0.6364	-0.6364	-0.6364	-0.6364	-0.6364	-0.6364	-0.6364	0.701755	0.437045	0.91696	-0.6364	-0.6364	0.528901	-0.6364	-0.6364	-0.6364	-0.6364	-0.6364	-0.6364	-0.6364	-0.113423	-0.6364	-0.6364	-0.6364	-0.6364	-0.6364	-0.6364	-0.6364	-0.6364	0.144186	-0.6364	-0.6364	-0.6364	0.386698	-0.6364	-0.6364	-0.6364	-0.6364	-0.6364	-0.6364	1.03998	-0.6364	-0.6364	-0.6364	-0.6364	-0.6364	-0.6364	-0.6364
PNN--chr14--+	-0.62502	-0.62502	-0.62502	1.03082	-0.62502	-0.62502	-0.62502	-0.62502	0.754421	-0.62502	-0.62502	-0.62502	1.40888	0.576234	-0.62502	-0.62502	-0.62502	-0.62502	-0.62502	-0.146219	0.791258	-0.62502	-0.62502	-0.177097	-0.62502	0.592873	-0.62502	0.459458	-0.62502	2	0.17965	0.63589	-0.62502	-0.62502	0.429644	-0.217499	-0.62502	0.352433	0.734041	-0.62502	-0.62502	-0.62502	-0.62502	-0.62502	0.183956	-0.62502	-0.62502	-0.62502	-0.62502
POLD4--chr11---	0.193109	-0.632521	-0.632521	1.73258	0.202661	-0.632521	0.492657	0.275428	-0.632521	0.565588	2	2	-0.632521	1.52285	-0.632521	1.92159	-0.632521	-0.632521	-0.632521	-0.632521	0.248666	-0.0488095	-0.632521	-0.632521	-0.632521	0.111774	0.408142	-0.632521	-0.632521	2	0.885533	2	-0.632521	0.747707	0.509394	-0.191287	2	-0.632521	0.208753	0.211734	0.837898	1.23855	0.974891	2	1.40901	-0.632521	-0.632521	0.2906	-0.632521
POLR2F--chr22--+	-0.55577	-0.55577	2	0.61126	0.370705	-0.55577	2	-0.55577	-0.55577	0.773303	-0.55577	-0.55577	-0.55577	-0.55577	-0.55577	-0.55577	-0.55577	-0.55577	0.68704	0.496337	0.421739	0.0917469	-0.55577	-0.55577	0.642692	2	0.598648	0.746776	-0.55577	-0.55577	2	2	1.22735	-0.55577	0.710967	-0.0663046	-0.55577	0.61823	0.377463	1.64211	0.376698	-0.55577	0.171706	-0.55577	1.13623	-0.55577	-0.55577	0.468256	-0.55577
POLR2J--chr7---	0.224823	-0.5657	-0.5657	2	-0.5657	-0.5657	1.82247	-0.5657	-0.5657	0.581463	2	-0.5657	-0.5657	-0.5657	-0.5657	1.8798	-0.5657	2	-0.5657	0.694212	-0.5657	-0.00680873	-0.5657	-0.101343	-0.5657	-0.5657	-0.5657	-0.5657	-0.5657	2	0.887804	0.741472	-0.5657	-0.5657	-0.5657	-0.143228	-0.5657	0.447614	-0.5657	-0.5657	-0.5657	1.22581	-0.5657	-0.5657	-0.5657	-0.5657	-0.5657	0.964312	1.81016
POLR2L--chr11---	0.447477	-0.748122	1.64371	-0.748122	0.459809	1.60002	0.181526	-0.748122	0.485892	0.910788	-0.748122	-0.748122	1.07136	1.0327	-0.748122	1.36214	-0.748122	-0.748122	1.30569	0.839266	1.302	-0.265846	-0.748122	0.532336	0.144503	-0.133168	-0.748122	-0.748122	-0.748122	-0.748122	0.93134	1.10842	0.579959	2	0.195354	0.650668	-0.748122	0.126283	-0.0530421	-0.0505787	-0.053612	2	0.88432	-0.748122	-0.748122	-0.748122	2	-0.748122	-0.748122
POMP--chr13--+	-0.0735326	0.182732	1.6333	1.90568	-0.754552	-0.754552	-0.754552	-0.754552	-0.754552	-0.754552	-0.754552	-0.754552	-0.754552	0.318271	-0.754552	1.3522	-0.754552	-0.754552	-0.754552	0.830194	-0.0277071	0.731179	1.34531	0.269995	-0.754552	1.04447	-0.754552	-0.754552	-0.754552	2	-0.0359129	2	-0.754552	-0.754552	-0.754552	0.64191	-0.754552	0.731986	0.875016	-0.754552	-0.0611982	1.66618	-0.754552	-0.754552	0.503565	-0.754552	-0.754552	-0.754552	0.510338
PON3--chr7---	2	1.15084	-0.630679	1.5666	0.727573	1.04231	0.414659	-0.630679	0.756902	0.482415	0.980056	-0.630679	-0.630679	-0.630679	-0.630679	1.7422	-0.630679	-0.630679	-0.630679	0.591816	-0.630679	1.57592	-0.630679	1.50317	1.07411	0.0608036	-0.630679	0.460199	2	-0.630679	0.178739	2	-0.630679	-0.630679	0.430209	1.71664	2	0.352542	0.736402	0.153671	1.20351	1.10763	-0.630679	2	1.66412	-0.630679	1.92797	1.34832	1.67462
PPA1--chr10---	0.388907	-0.503165	-0.503165	-0.503165	1.07648	-0.503165	0.71256	-0.503165	1.11059	-0.503165	-0.503165	-0.503165	-0.503165	-0.503165	-0.503165	-0.503165	-0.503165	-0.503165	-0.503165	0.0569647	-0.503165	0.639608	-0.503165	0.020842	-0.503165	0.301027	-0.503165	-0.503165	-0.503165	-0.503165	0.438185	0.971922	-0.503165	-0.503165	-0.503165	-0.503165	-0.503165	-0.503165	-0.503165	-0.503165	-0.503165	-0.503165	-0.503165	-0.503165	0.443223	-0.503165	-0.503165	-0.503165	-0.503165
PPDPF--chr20--+	0.329126	-1.02827	0.635537	2	0.100461	0.336498	0.912957	-1.02827	-1.02827	0.125698	2	-1.02827	-1.02827	-1.02827	-1.02827	-1.02827	-1.02827	1.16363	0.675803	0.356487	1.1037	-0.191075	-1.02827	0.0200731	-1.02827	-0.00155361	-0.430165	-0.35342	-1.02827	1.72324	1.22178	1.18322	-0.104433	-1.02827	0.07856	0.0801222	0.758919	-1.02827	0.897931	0.110458	-0.545159	-1.02827	-0.35233	1.58666	-0.52486	-1.02827	-1.02827	0.851042	-1.02827
PPIA--chr7--+	-0.513959	0.151903	-1.01742	0.0758281	-0.125912	-0.372653	0.503536	-0.463762	-1.01742	-0.286825	-1.01742	-1.01742	-1.01742	-0.224308	-1.01742	-1.01742	-1.01742	-1.01742	-1.01742	0.310139	-1.01742	-0.37247	-1.01742	0.383162	-1.01742	0.0719188	-0.382834	-1.01742	-1.01742	1.04923	-0.486148	0.750734	-1.01742	-1.01742	0.156919	0.0149511	-1.01742	-0.37207	-1.01742	-1.01742	-0.504841	-1.01742	-0.617525	-1.01742	0.227485	-1.01742	-1.01742	-0.454511	-1.01742
PPIB--chr15---	-0.334626	-0.900151	-0.900151	-0.900151	0.101256	-0.1759	0.808297	0.178447	-0.900151	-0.900151	-0.900151	-0.900151	-0.900151	1.01301	-0.900151	-0.900151	-0.900151	-0.900151	0.397235	0.75018	-0.900151	-0.900151	1.69486	0.94582	-0.900151	1.21752	-0.187337	-0.900151	0.982042	-0.900151	0.139657	0.63897	-0.900151	-0.900151	-0.900151	0.704382	1.22979	-0.900151	-0.323911	-0.321869	-0.900151	1.62138	-0.0945735	-0.900151	0.498218	-0.900151	-0.900151	0.859928	0.150225
PPIG--chr2--+	0.216207	0.520353	-0.592057	-0.592057	0.839183	-0.592057	-0.592057	0.296794	-0.592057	0.580851	-0.592057	-0.592057	-0.592057	0.681217	-0.592057	1.90833	-0.592057	-0.592057	-0.592057	-0.592057	-0.592057	-0.592057	1.90015	-0.117279	-0.592057	0.136583	-0.592057	0.557441	-0.592057	-0.592057	-0.592057	-0.592057	-0.592057	-0.592057	-0.592057	-0.592057	-0.592057	0.443998	0.848486	-0.592057	-0.592057	1.23966	-0.592057	-0.592057	0.901133	-0.592057	2	-0.592057	-0.592057
PPP1R12A--chr12---	-0.40651	-0.40651	-0.40651	-0.40651	-0.40651	-0.40651	-0.40651	-0.40651	-0.40651	-0.40651	-0.40651	-0.40651	-0.40651	-0.40651	-0.40651	-0.40651	-0.40651	-0.40651	0.857299	-0.40651	0.587515	-0.40651	-0.40651	0.140571	-0.40651	-0.40651	-0.40651	-0.40651	-0.40651	-0.40651	0.576293	-0.40651	-0.40651	-0.40651	-0.40651	0.0912254	-0.40651	-0.40651	-0.40651	-0.40651	-0.40651	-0.40651	-0.40651	-0.40651	-0.40651	-0.40651	-0.40651	-0.40651	-0.40651
PPP1R15A--chr19--+	-0.700973	-0.700973	-0.700973	-0.700973	-0.700973	-0.700973	-0.700973	-0.700973	-0.700973	-0.0990542	-0.700973	-0.700973	-0.700973	2	-0.700973	-0.700973	-0.700973	-0.700973	-0.700973	-0.700973	-0.700973	-0.700973	-0.700973	-0.700973	-0.700973	-0.700973	-0.700973	-0.700973	-0.700973	-0.700973	-0.700973	-0.700973	-0.700973	-0.700973	-0.700973	-0.126355	-0.700973	-0.700973	-0.700973	-0.700973	-0.700973	1.14846	-0.700973	0.898587	-0.700973	-0.700973	-0.700973	-0.700973	-0.700973
PRAP1--chr10--+	2	-0.698848	1.11279	1.0731	1.21361	-0.0371488	1.41486	1.50458	1.58009	1.24921	-0.698848	-0.698848	1.40466	0.115091	-0.698848	1.67844	-0.698848	1.6878	1.15664	1.8061	1.0838	0.787518	2	1.20293	0.449497	1.88186	1.30434	-0.698848	1.02079	2	1.06946	2	-0.698848	-0.698848	1.43628	1.51496	2	0.428972	1.95306	0.804448	1.55523	0.472074	0.738794	-0.698848	1.45413	-0.698848	1.83015	-0.121156	0.854
PRDX1--chr1---	0.49249	-0.102469	-0.937903	-0.164432	0.813779	-0.160515	0.895891	-0.270365	-0.937903	0.988533	0.336783	-0.937903	-0.937903	0.0183417	1.86432	-0.937903	-0.937903	-0.937903	-0.937903	0.0295415	0.570408	0.133058	-0.937903	0.201514	0.83798	0.375497	0.786005	-0.0746161	-0.937903	-0.937903	0.178194	1.89108	-0.937903	0.0768621	-0.937903	0.638385	-0.937903	0.3871	0.143963	-0.317193	-0.319892	-0.937903	0.243892	-0.937903	-0.937903	-0.937903	1.08693	0.236942	0.189538
PRDX2--chr19---	0.0845875	0.367468	-0.667164	-0.667164	0.0932841	-0.667164	1.06393	1.2466	-0.667164	-0.667164	-0.667164	-0.667164	-0.667164	-0.667164	-0.667164	1.6584	-0.667164	-0.667164	0.352931	1.52662	0.729065	-0.135684	1.65079	0.743933	1.53216	0.533489	0.280379	-0.667164	-0.667164	2	-0.667164	1.37879	-0.667164	0.589559	0.37257	1.08879	-0.667164	0.296452	1.13165	0.101546	-0.667164	1.03648	-0.667164	-0.667164	0.13036	-0.667164	1.84047	0.173354	1.59217
PRDX4--chrX--+	1.65358	0.446849	2	-0.672096	1.2618	0.369104	0.435886	-0.672096	1.71713	0.507702	1.03516	-0.672096	-0.672096	2	-0.672096	-0.672096	-0.672096	2	1.19306	0.939521	-0.672096	-0.672096	1.83475	1.12407	0.39176	1.08702	0.352663	-0.672096	-0.672096	2	0.185828	2	-0.672096	0.687038	-0.672096	1.22696	-0.672096	-0.672096	0.156321	0.159257	0.775851	1.17038	0.486022	-0.672096	0.190419	-0.672096	-0.672096	-0.672096	0.837951
PRDX5--chr11--+	0.978301	-0.811525	2	-0.811525	0.296418	-0.811525	-0.811525	-0.123453	-0.811525	-0.811525	-0.811525	1.79326	-0.811525	-0.811525	-0.811525	1.12406	-0.811525	-0.811525	1.07228	0.644465	0.350568	0.783269	-0.811525	0.362942	0.00721167	-0.811525	0.534264	0.0783173	-0.811525	1.75685	-0.811525	-0.811525	0.406623	0.907366	-0.811525	0.274643	-0.811525	-0.811525	-0.173981	0.689972	0.302805	0.606431	-0.811525	-0.811525	-0.811525	-0.811525	-0.811525	-0.811525	-0.811525
PRDX6--chr1--+	0.99549	1.11813	-0.911792	-0.0622085	1.01226	-0.0579064	-0.00313924	0.785574	0.294353	-0.911792	1.31129	2	-0.911792	0.138551	-0.911792	1.15081	-0.911792	-0.911792	-0.00704134	0.150853	0.744943	-0.0576643	-0.911792	1.11014	0.570082	0.1531	-0.0713897	0.0364457	-0.911792	1.82513	-0.911792	0.190713	-0.911792	0.9199	0.64342	0.645615	-0.911792	-0.911792	0.276534	-0.230002	1.3125	2	-0.382198	1.65941	-0.204446	-0.911792	1.3123	-0.166313	0.326593
PROC--chr2--+	0.871476	1.35415	-0.61298	0.466236	1.83112	2	1.33736	1.99044	0.919172	1.44672	-0.61298	-0.61298	1.64609	-0.61298	-0.61298	2	-0.61298	-0.61298	-0.61298	1.06594	-0.61298	0.472009	1.99856	1.74319	-0.61298	1.21959	0.454573	-0.61298	-0.61298	-0.61298	0.28077	2	-0.61298	1.7138	1.9756	0.224939	-0.61298	-0.61298	0.250031	0.25309	0.895433	-0.61298	0.0597569	2	0.285554	2	2	-0.61298	-0.61298
PRRC2C--chr1--+	-0.708482	-0.708482	-0.708482	0.159849	-0.708482	1.25147	0.220221	-0.708482	-0.708482	-0.708482	0.722533	-0.708482	-0.708482	-0.708482	-0.708482	-0.708482	-0.708482	-0.708482	-0.708482	-0.708482	-0.708482	-0.226696	-0.708482	0.0275659	0.183236	0.379908	-0.708482	-0.708482	-0.708482	2	0.544495	0.418351	-0.708482	0.430735	1.37427	-0.708482	-0.708482	-0.708482	-0.0141082	-0.0116473	0.505178	-0.708482	0.262245	-0.708482	0.0144728	-0.708482	-0.708482	0.0534468	-0.708482
PSAP--chr10---	-0.55854	-0.55854	-0.55854	-0.55854	0.229305	0.43889	0.502864	-0.55854	-0.55854	-0.55854	1.07695	-0.55854	-0.55854	-0.55854	-0.55854	-0.55854	-0.55854	2	-0.55854	-0.55854	-0.55854	-0.00791213	-0.55854	-0.101049	-0.55854	-0.55854	-0.55854	-0.55854	-0.55854	-0.55854	0.263318	-0.55854	-0.55854	-0.55854	-0.55854	1.0385	-0.55854	-0.55854	1.30508	-0.55854	-0.55854	-0.55854	-0.55854	-0.55854	1.36728	1.99959	-0.55854	-0.55854	-0.55854
PSMA2--chr7---	0.161852	-0.645723	-0.645723	1.1079	0.784295	-0.645723	-0.645723	-0.645723	-0.645723	-0.645723	1.05012	-0.645723	-0.645723	0.626464	-0.645723	-0.645723	-0.645723	-0.645723	0.450121	1.71096	1.36093	0.779084	1.84436	-0.17135	0.411018	1.82143	-0.645723	-0.645723	-0.645723	2	0.839132	0.689643	-0.645723	-0.645723	-0.645723	-0.214138	-0.645723	-0.645723	-0.645723	0.180069	0.792539	1.18443	0.504648	-0.645723	0.211023	-0.645723	-0.645723	0.25721	-0.645723
PSMA6--chr14--+	-0.524192	-0.524192	-0.524192	-0.524192	-0.524192	-0.524192	-0.524192	-0.524192	-0.524192	-0.524192	-0.524192	-0.524192	-0.524192	0.852448	-0.524192	-0.524192	-0.524192	-0.524192	0.661627	0.868572	-0.524192	-0.524192	-0.524192	-0.0108713	-0.524192	-0.524192	0.577288	-0.524192	-0.524192	-0.524192	-0.524192	-0.524192	-0.524192	-0.524192	-0.524192	-0.524192	2	-0.524192	-0.524192	-0.524192	-0.524192	-0.524192	0.720631	-0.524192	-0.524192	-0.524192	2	0.452876	-0.524192
PSMA7--chr20---	0.649842	-0.819628	2	-0.819628	0.979908	-0.819628	-0.819628	1.09721	1.01297	-0.819628	0.489881	-0.819628	-0.819628	-0.819628	-0.819628	-0.819628	-0.819628	-0.819628	0.610988	-0.428071	0.338584	-0.0207765	-0.819628	0.350917	-0.819628	-0.819628	-0.819628	-0.819628	1.25585	1.74017	0.715671	2	-0.819628	-0.819628	-0.819628	0.0442611	-0.819628	-0.020281	0.291793	-0.181961	-0.184734	0.593593	-0.324308	-0.819628	-0.158059	-0.819628	-0.819628	-0.122394	0.338613
PSMB1--chr6---	-0.780762	0.132627	1.54622	0.0648828	-0.780762	0.0691649	0.123678	0.485001	-0.780762	-0.780762	-0.780762	-0.780762	-0.780762	0.264711	-0.780762	1.27228	-0.780762	-0.780762	-0.780762	0.969214	0.451851	0.0694059	1.26557	0.217667	0.0876589	-0.780762	0.0557441	0.805194	-0.780762	1.94347	-0.0804431	1.55	-0.780762	0.328692	0.137132	-0.124192	1.71878	-0.780762	-0.104529	-0.102133	-0.780762	1.57826	-0.253623	2	0.445282	-0.780762	1.43301	-0.780762	-0.780762
PSMB10--chr16---	-0.382229	-0.382229	-0.382229	-0.382229	-0.382229	-0.382229	-0.382229	-0.382229	-0.382229	-0.382229	-0.382229	-0.382229	-0.382229	-0.382229	-0.382229	-0.382229	-0.382229	-0.382229	-0.382229	-0.382229	-0.382229	0.263823	-0.382229	-0.382229	-0.382229	-0.382229	-0.382229	-0.382229	-0.382229	-0.382229	-0.382229	-0.382229	-0.382229	-0.382229	-0.382229	-0.382229	-0.382229	1.61244	-0.382229	-0.382229	-0.382229	-0.382229	-0.382229	-0.382229	-0.382229	-0.382229	-0.382229	-0.382229	-0.382229
PSMB3--chr17--+	1.44201	-0.636476	-0.636476	-0.636476	0.650155	-0.636476	-0.636476	0.162568	-0.636476	-0.636476	0.889324	-0.636476	-0.636476	-0.636476	-0.636476	1.61128	2	2	-0.636476	0.803846	-0.636476	-0.122778	1.60393	-0.636476	0.978417	0.0185441	-0.636476	-0.636476	-0.636476	-0.636476	-0.636476	-0.636476	-0.636476	-0.636476	-0.636476	0.0823633	2	-0.636476	-0.636476	-0.636476	-0.636476	-0.636476	-0.636476	-0.636476	0.134364	-0.636476	-0.636476	-0.636476	-0.636476
PSMB6--chr17--+	-0.562014	-0.562014	-0.562014	-0.562014	-0.562014	-0.562014	0.591273	-0.562014	0.968858	-0.562014	-0.562014	-0.562014	-0.562014	0.77111	-0.562014	-0.562014	-0.562014	-0.562014	0.58632	-0.562014	1.00974	0.931039	-0.562014	-0.562014	-0.562014	0.789576	0.504648	0.641515	-0.562014	-0.562014	0.33099	2	-0.562014	-0.562014	-0.562014	-0.109757	-0.562014	0.522741	-0.562014	1.46879	-0.562014	-0.562014	0.643459	-0.562014	-0.562014	-0.562014	2	-0.562014	-0.562014
PSMB7--chr9---	0.427579	-0.493383	-0.493383	-0.493383	1.69729	-0.493383	-0.493383	0.519403	-0.493383	-0.493383	-0.493383	-0.493383	-0.493383	-0.493383	-0.493383	2	-0.493383	2	-0.493383	1.33222	-0.493383	-0.493383	-0.493383	-0.493383	0.71173	0.336853	-0.493383	-0.493383	-0.493383	-0.493383	-0.493383	2	-0.493383	-0.493383	0.780383	-0.493383	-0.493383	-0.493383	-0.493383	-0.493383	-0.493383	-0.493383	0.23813	2	-0.493383	-0.493383	-0.493383	-0.493383	-0.493383
PSMB8--chr6---	0.352311	-0.504843	2	0.587358	-0.504843	-0.504843	-0.504843	-0.504843	-0.504843	-0.504843	-0.504843	-0.504843	-0.504843	-0.504843	-0.504843	-0.504843	-0.504843	-0.504843	-0.504843	-0.504843	-0.504843	-0.504843	-0.504843	-0.504843	-0.504843	-0.504843	0.575555	-0.504843	-0.504843	-0.504843	1.07117	0.912506	-0.504843	-0.504843	0.680672	-0.504843	-0.504843	-0.504843	-0.504843	0.371647	0.367836	-0.504843	-0.504843	-0.504843	-0.504843	-0.504843	2	-0.504843	-0.504843
PSMB9--chr6--+	0.590987	-0.572743	-0.572743	-0.572743	-0.572743	-0.572743	-0.572743	-0.572743	-0.572743	1.04195	-0.572743	-0.572743	-0.572743	-0.572743	-0.572743	-0.572743	-0.572743	-0.572743	-0.572743	-0.572743	-0.572743	-0.572743	-0.572743	-0.572743	-0.572743	0.0258198	-0.572743	-0.572743	-0.572743	-0.572743	-0.572743	-0.572743	-0.572743	-0.572743	-0.572743	-0.572743	-0.572743	-0.572743	0.10381	-0.572743	-0.572743	-0.572743	-0.572743	-0.572743	-0.572743	-0.572743	-0.572743	-0.572743	-0.572743
PSMD8--chr19--+	0.116685	-0.636808	-0.636808	0.323306	-0.636808	-0.636808	0.39006	-0.636808	0.726256	0.456619	0.945466	-0.636808	-0.636808	0.550184	-0.636808	-0.636808	-0.636808	2	0.38565	-0.163692	0.167387	0.328441	1.68652	0.177041	0.349165	0.0424566	0.31293	0.434795	-0.636808	2	-0.636808	2	-0.636808	-0.636808	-0.636808	-0.234125	2	-0.636808	-0.636808	-0.636808	-0.636808	2	-0.636808	-0.636808	0.755197	-0.636808	-0.636808	-0.636808	-0.636808
PSME1--chr14--+	-0.612496	-0.612496	-0.612496	0.303751	-0.612496	0.30839	0.367455	-0.612496	1.50065	-0.612496	-0.612496	-0.612496	-0.612496	-0.612496	-0.612496	-0.612496	-0.612496	-0.612496	-0.612496	-0.160996	-0.612496	-0.612496	2	-0.612496	-0.612496	-0.612496	-0.612496	-0.612496	-0.612496	-0.612496	-0.612496	-0.612496	-0.612496	-0.612496	0.382032	-0.612496	2	-0.612496	-0.612496	0.122791	0.668136	1.01708	-0.0413472	-0.612496	-0.612496	-0.612496	-0.612496	-0.612496	-0.612496
PSME2--chr14---	-0.57007	-0.57007	-0.57007	-0.57007	-0.57007	-0.57007	-0.57007	-0.57007	-0.57007	-0.57007	-0.57007	2	-0.57007	-0.57007	-0.57007	-0.57007	-0.57007	-0.57007	0.43178	-0.57007	-0.57007	-0.048096	-0.57007	0.540661	-0.57007	-0.57007	0.360526	0.479934	-0.57007	-0.57007	-0.57007	0.650757	-0.57007	-0.57007	-0.57007	0.160351	-0.57007	0.376311	-0.57007	-0.57007	-0.57007	1.1031	-0.57007	-0.57007	-0.57007	-0.57007	-0.57007	-0.57007	-0.57007
PTGDS--chr9--+	0.23627	-0.29265	-0.29265	-0.29265	-0.29265	-0.29265	-0.29265	-0.29265	-0.29265	-0.29265	-0.29265	-0.29265	-0.29265	-0.29265	-0.29265	-0.29265	-0.29265	-0.29265	-0.29265	-0.29265	-0.29265	-0.29265	-0.29265	-0.29265	-0.29265	-0.29265	-0.29265	-0.29265	-0.29265	-0.29265	-0.29265	-0.29265	-0.29265	-0.29265	-0.29265	-0.29265	1.69943	-0.29265	-0.29265	-0.29265	-0.29265	-0.29265	-0.29265	-0.29265	-0.29265	-0.29265	-0.29265	-0.29265	-0.29265
PTGES3--chr12---	0.422115	-0.723014	-0.723014	-0.723014	-0.723014	0.113723	1.25078	-0.723014	-0.723014	-0.723014	-0.723014	-0.723014	1.01966	-0.723014	2	1.29817	-0.723014	-0.723014	0.163567	-0.723014	-0.723014	-0.261096	-0.723014	-0.339228	-0.723014	-0.134019	-0.723014	-0.723014	-0.723014	-0.723014	-0.0335631	-0.723014	-0.723014	-0.723014	-0.723014	0.182102	-0.723014	-0.723014	-0.723014	-0.0549162	0.440595	0.757649	-0.204056	-0.723014	-0.723014	-0.723014	-0.723014	-0.723014	-0.723014
PTGR1--chr9---	0.101109	0.401528	2	1.03636	-0.697251	0.325185	0.390763	0.180709	0.746977	-0.697251	0.979241	-0.697251	1.43218	2	2	-0.697251	-0.697251	-0.697251	2	1.16055	0.785545	1.04447	1.76442	1.72379	0.347433	-0.697251	-0.697251	1.2106	-0.697251	-0.697251	0.770663	1.47555	-0.697251	0.637388	1.16495	1.37592	-0.697251	0.326109	0.116236	1.21861	0.724601	-0.697251	0.85707	-0.697251	1.27685	-0.697251	-0.697251	-0.697251	0.785582
PTMA--chr2--+	-0.947913	-1.0671	-0.39261	-0.26596	-1.18259	-1.09738	-0.0740993	-0.898966	-1.50292	-0.73284	-0.447102	-1.50292	-1.50292	-1.00408	-1.50292	-0.523319	-1.50292	-0.0402004	-0.776458	-0.0141358	-0.287401	-0.334086	-0.526522	-0.621997	-0.576497	-0.420198	-0.821814	-0.169282	0.0441839	-1.50292	-0.920686	-0.6411	-1.50292	-0.381411	-1.06495	-0.763255	-0.310274	-1.50292	-0.7452	-0.74301	-0.938956	0.129781	-0.745127	-1.50292	-0.55555	-1.50292	-1.50292	-0.685923	-1.50292
PTPRC--chr1--+	-0.485019	-0.485019	-0.485019	-0.485019	-0.485019	-0.485019	-0.485019	-0.485019	-0.485019	-0.485019	-0.485019	-0.485019	-0.485019	-0.485019	-0.485019	-0.485019	-0.485019	-0.485019	-0.485019	-0.485019	-0.485019	-0.485019	-0.485019	-0.485019	-0.485019	-0.485019	-0.485019	-0.485019	-0.485019	-0.485019	-0.485019	-0.485019	-0.485019	-0.485019	-0.485019	-0.485019	-0.485019	-0.485019	-0.485019	-0.485019	-0.485019	-0.485019	-0.485019	-0.485019	-0.485019	-0.485019	-0.485019	-0.485019	-0.485019
RAB13--chr1---	-0.548311	-0.548311	-0.548311	1.25428	0.921644	0.514809	1.36326	-0.548311	-0.548311	0.656324	-0.548311	-0.548311	-0.548311	-0.548311	-0.548311	-0.548311	-0.548311	-0.548311	1.95101	1.64062	0.337676	-0.548311	-0.548311	-0.0606902	-0.548311	-0.548311	-0.548311	-0.548311	-0.548311	-0.548311	-0.548311	-0.548311	-0.548311	0.839435	-0.548311	0.272952	-0.548311	-0.548311	0.931199	-0.548311	-0.548311	1.33295	0.111053	-0.548311	0.332362	-0.548311	-0.548311	1.05835	-0.548311
RAB8B--chr15--+	0.383347	-0.437658	-0.437658	-0.437658	-0.437658	-0.437658	-0.437658	-0.437658	-0.437658	-0.437658	-0.437658	-0.437658	-0.437658	0.855686	-0.437658	-0.437658	-0.437658	-0.437658	-0.437658	-0.437658	-0.437658	-0.437658	-0.437658	-0.437658	-0.437658	-0.437658	-0.437658	0.729959	-0.437658	-0.437658	-0.437658	-0.437658	-0.437658	-0.437658	-0.437658	-0.437658	-0.437658	-0.437658	-0.437658	-0.437658	-0.437658	-0.437658	-0.437658	-0.437658	0.433336	-0.437658	-0.437658	-0.437658	-0.437658
RABAC1--chr19---	-0.558424	-0.558424	-0.558424	0.39482	-0.558424	1.07325	-0.558424	-0.558424	-0.558424	-0.558424	-0.558424	-0.558424	-0.558424	1.97238	-0.558424	-0.558424	-0.558424	-0.558424	0.456718	-0.558424	-0.558424	-0.0295244	-0.558424	-0.118986	-0.558424	0.11598	-0.558424	-0.558424	1.93142	-0.558424	-0.558424	1.47759	-0.558424	-0.558424	0.476262	-0.558424	2	-0.558424	-0.558424	0.206554	-0.558424	2	-0.558424	-0.558424	0.235228	-0.558424	-0.558424	-0.558424	-0.558424
RAN--chr12--+	0.78111	-0.583526	-0.583526	-0.583526	-0.583526	-0.583526	1.20939	-0.583526	-0.583526	-0.583526	-0.583526	-0.583526	-0.583526	-0.583526	-0.583526	-0.583526	-0.583526	-0.583526	-0.583526	-0.583526	-0.583526	0.413886	-0.583526	0.587825	-0.583526	-0.583526	-0.583526	-0.583526	-0.583526	-0.583526	-0.583526	0.70393	-0.583526	-0.583526	-0.583526	-0.583526	-0.583526	-0.583526	-0.583526	0.212638	0.209176	1.18096	0.0349099	-0.583526	0.854862	-0.583526	-0.583526	0.287011	-0.583526
RARRES2--chr7---	1.51922	0.455124	2	1.24868	0.753107	0.849595	0.70899	0.350636	0.929874	0.656984	0.330621	2	0.915757	0.250382	-1.26126	1.14376	-1.26126	1.15147	0.579237	1.3901	0.640632	0.849932	1.36737	1.23162	0.242502	0.838755	0.923698	0.491854	2	2	1.31158	2	-0.0790037	0.681781	0.839401	0.728279	1.18333	0.0406819	0.678717	0.392194	0.67781	0.687568	0.761397	1.95844	1.02584	-1.26126	1.69317	1.15351	0.189636
RARRES3--chr11--+	-0.570164	-0.570164	-0.570164	-0.570164	-0.570164	-0.570164	0.334979	-0.570164	-0.570164	-0.570164	1.64433	-0.570164	-0.570164	-0.570164	-0.570164	-0.570164	-0.570164	-0.570164	0.953535	0.192799	-0.570164	-0.570164	-0.570164	0.147211	-0.570164	0.0285807	-0.570164	-0.570164	-0.570164	-0.570164	0.130699	0.528082	-0.570164	-0.570164	-0.570164	-0.570164	-0.570164	-0.570164	-0.570164	-0.570164	-0.570164	-0.570164	-0.570164	-0.570164	1.07213	-0.570164	2	0.172436	-0.570164
RBM25--chr14--+	0.326797	0.641407	-0.509279	-0.509279	-0.509279	-0.509279	-0.509279	1.08533	1.00318	-0.509279	-0.509279	-0.509279	-0.509279	-0.509279	-0.509279	-0.509279	-0.509279	-0.509279	-0.509279	-0.509279	-0.509279	-0.509279	-0.509279	-0.0181646	-0.509279	-0.509279	-0.509279	0.679771	-0.509279	-0.509279	-0.509279	-0.509279	-0.509279	1.78758	-0.509279	-0.509279	-0.509279	-0.509279	-0.509279	-0.509279	0.341939	-0.509279	0.154809	-0.509279	-0.509279	-0.509279	-0.509279	-0.509279	-0.509279
RBM3--chrX--+	-0.51787	-0.51787	-0.51787	-0.51787	-0.51787	-0.51787	-0.51787	-0.51787	-0.51787	-0.51787	1.22552	-0.51787	-0.51787	-0.51787	-0.51787	-0.51787	-0.51787	-0.51787	-0.51787	-0.51787	-0.51787	-0.51787	2	-0.51787	-0.51787	-0.51787	0.528576	0.66285	-0.51787	-0.51787	0.35821	0.854939	-0.51787	-0.51787	-0.51787	-0.0741841	-0.51787	-0.51787	-0.51787	0.331076	-0.51787	-0.51787	-0.51787	-0.51787	-0.51787	-0.51787	-0.51787	0.41038	-0.51787
RBM39--chr20---	-0.662721	-0.662721	-0.662721	-0.662721	0.0371984	-0.662721	0.930581	-0.662721	-0.662721	-0.662721	-0.662721	-0.662721	-0.662721	-0.662721	-0.662721	-0.662721	-0.662721	-0.662721	-0.662721	-0.662721	-0.662721	-0.662721	-0.662721	-0.256287	-0.662721	-0.662721	-0.662721	-0.662721	-0.662721	-0.662721	-0.662721	-0.662721	-0.662721	-0.662721	-0.662721	-0.292947	-0.662721	-0.662721	-0.662721	-0.662721	-0.662721	-0.662721	-0.662721	-0.662721	0.615524	-0.662721	-0.662721	-0.662721	-0.662721
RBM8A--chr1---	0.672667	-0.611152	-0.611152	-0.611152	-0.611152	-0.611152	0.387092	-0.611152	-0.611152	-0.611152	-0.611152	-0.611152	-0.611152	0.542753	-0.611152	-0.611152	2	-0.611152	-0.611152	-0.151224	-0.611152	0.327191	-0.611152	-0.180884	-0.611152	-0.611152	-0.611152	0.43058	-0.611152	2	-0.611152	0.600057	-0.611152	-0.611152	-0.611152	-0.219694	-0.611152	0.327773	0.135216	0.698463	-0.611152	-0.611152	-0.611152	-0.611152	-0.611152	-0.611152	-0.611152	-0.611152	-0.611152
RBP1--chr3---	-0.622735	-0.622735	1.17487	0.0305305	-0.104124	-0.622735	0.926068	-0.622735	-0.622735	-0.622735	-0.622735	-0.622735	-0.622735	0.184899	-0.622735	0.963253	-0.622735	-0.622735	-0.622735	-0.300825	-0.622735	-0.622735	1.72979	-0.321585	0.0481253	-0.16056	-0.622735	-0.622735	-0.622735	-0.622735	-0.622735	1.49963	-0.622735	-0.622735	-0.622735	-0.622735	2	-0.622735	-0.622735	-0.0984899	-0.10077	-0.622735	-0.622735	1.35432	-0.622735	-0.622735	-0.622735	-0.0495181	0.32949
RBP4--chr10---	1.52488	0.0706865	2	1.01439	0.895017	0.357977	0.652239	1.75196	0.635839	1.40831	0.75229	1.12708	0.565749	0.775319	-1.91061	1.96977	-1.91061	2	0.830831	1.18649	0.984213	0.917769	2	1.35233	1.07861	1.26007	0.933931	0.192728	1.34446	2	0.886217	2	-0.844731	0.293418	0.934875	1.23963	2	0.295417	1.40232	1.31646	0.415086	0.77112	0.846295	1.49925	1.05575	0.0852086	1.72484	0.892231	1.22588
RBP5--chr12---	1.12481	-0.484148	2	0.685584	0.444472	2	0.766912	0.525381	-0.484148	-0.484148	1.44358	2	-0.484148	-0.484148	-0.484148	2	-0.484148	-0.484148	2	0.978933	0.495624	0.164868	2	1.54397	1.55614	-0.484148	-0.484148	0.821414	-0.484148	2	1.20374	2	1.3031	1.0505	-0.484148	1.10946	-0.484148	0.69257	-0.484148	-0.484148	-0.484148	-0.484148	0.245013	2	0.489747	-0.484148	-0.484148	1.29259	1.2209
RBP7--chr1--+	0.424986	-0.314188	-0.314188	-0.314188	-0.314188	-0.314188	-0.314188	-0.314188	-0.314188	-0.314188	-0.314188	-0.314188	-0.314188	0.850247	-0.314188	-0.314188	-0.314188	-0.314188	-0.314188	-0.314188	-0.314188	-0.314188	-0.314188	-0.314188	-0.314188	-0.314188	-0.314188	-0.314188	-0.314188	-0.314188	-0.314188	-0.314188	-0.314188	-0.314188	-0.314188	0.0808426	-0.314188	-0.314188	-0.314188	-0.314188	-0.314188	-0.314188	-0.314188	-0.314188	-0.314188	-0.314188	-0.314188	-0.314188	-0.314188
RBX1--chr22--+	-0.650241	-0.650241	-0.650241	1.46389	0.0963167	-0.650241	0.35554	-0.650241	-0.650241	-0.650241	0.899541	-0.650241	1.31824	-0.650241	2	-0.650241	-0.650241	-0.650241	-0.650241	-0.650241	0.13744	-0.128469	1.62538	0.146895	-0.650241	0.0150748	-0.650241	1.11342	1.80605	-0.650241	-0.650241	1.94168	-0.650241	-0.650241	0.370501	-0.650241	-0.650241	-0.650241	-0.650241	-0.650241	0.101146	-0.650241	-0.650241	-0.650241	0.132715	-0.650241	-0.650241	-0.650241	-0.650241
REEP5--chr5---	0.973942	0.643767	-0.563559	0.554222	-0.563559	-0.563559	-0.563559	-0.563559	2	-0.563559	-0.563559	-0.563559	-0.563559	-0.563559	-0.563559	-0.563559	-0.563559	-0.563559	0.626804	-0.0127491	-0.563559	-0.563559	-0.563559	-0.563559	-0.563559	0.227252	-0.563559	0.684019	-0.563559	-0.563559	-0.563559	-0.563559	-0.563559	-0.563559	-0.563559	0.65169	2	-0.563559	0.330291	-0.563559	-0.563559	1.42445	-0.563559	-0.563559	-0.563559	-0.563559	-0.563559	0.417253	-0.563559
REL--chr2--+	-0.453017	-0.453017	-0.453017	-0.453017	-0.453017	0.37674	-0.453017	-0.453017	-0.453017	-0.453017	-0.453017	-0.453017	-0.453017	-0.453017	-0.453017	-0.453017	-0.453017	-0.453017	-0.453017	-0.453017	-0.453017	0.00504732	-0.453017	-0.0724327	-0.453017	-0.453017	-0.453017	-0.453017	-0.453017	-0.453017	-0.453017	-0.453017	-0.453017	-0.453017	-0.453017	-0.106761	-0.453017	-0.453017	-0.453017	-0.453017	-0.453017	-0.453017	-0.453017	-0.453017	-0.453017	-0.453017	-0.453017	-0.453017	-0.453017
RGN--chrX--+	0.6012	-0.695351	1.89844	1.84162	2	-0.695351	-0.695351	1.18786	-0.695351	0.378138	-0.695351	2	-0.695351	0.469997	-0.695351	1.5931	-0.695351	-0.695351	1.00174	-0.230862	0.678595	0.918516	1.58561	0.103658	0.948778	0.905253	0.895779	0.356712	-0.695351	2	2	1.90266	-0.695351	0.541314	0.327789	0.588829	-0.695351	-0.695351	0.623088	0.0610902	0.622125	0.981103	1.36298	-0.695351	1.84604	-0.695351	-0.695351	0.131752	-0.695351
RGS2--chr1--+	-0.442778	-0.442778	-0.442778	-0.442778	-0.442778	-0.442778	-0.442778	-0.442778	-0.442778	-0.442778	-0.442778	-0.442778	-0.442778	-0.442778	-0.442778	-0.442778	-0.442778	-0.442778	-0.442778	-0.442778	-0.442778	-0.442778	-0.442778	-0.442778	-0.442778	-0.442778	-0.442778	-0.442778	-0.442778	-0.442778	-0.442778	-0.442778	-0.442778	-0.442778	-0.442778	-0.442778	-0.442778	-0.442778	-0.442778	-0.442778	-0.442778	-0.442778	-0.442778	-0.442778	-0.442778	-0.442778	-0.442778	-0.442778	-0.442778
RHOA--chr3---	0.249978	-0.554401	-0.554401	-0.554401	0.259283	-0.554401	-0.554401	-0.554401	-0.554401	-0.554401	-0.554401	-0.554401	-0.554401	1.54549	-0.554401	1.93396	-0.554401	-0.554401	-0.554401	-0.554401	0.304104	0.476035	-0.554401	-0.0819055	-0.554401	-0.554401	0.459476	-0.554401	-0.554401	-0.554401	0.294412	-0.554401	-0.554401	-0.554401	-0.554401	-0.554401	-0.554401	-0.554401	-0.554401	-0.554401	-0.554401	-0.554401	-0.554401	-0.554401	0.298955	-0.554401	-0.554401	-0.554401	-0.554401
RHOC--chr1---	-0.454013	-0.454013	-0.454013	-0.454013	-0.454013	-0.454013	-0.454013	-0.454013	-0.454013	-0.454013	1.5184	-0.454013	-0.454013	-0.454013	-0.454013	-0.454013	-0.454013	-0.454013	-0.454013	0.624977	-0.454013	-0.454013	-0.454013	0.0977249	-0.454013	-0.454013	-0.454013	-0.454013	-0.454013	-0.454013	-0.454013	-0.454013	-0.454013	-0.454013	-0.454013	-0.454013	-0.454013	-0.454013	-0.454013	0.506457	-0.454013	-0.454013	0.292051	-0.454013	-0.454013	-0.454013	-0.454013	-0.454013	-0.454013
RNA18S5--chr21--+	-1.32995	-1.31408	-1.57819	-1.04387	-1.26397	-1.32232	-1.10308	-1.40754	-0.299488	-0.857751	-0.496029	-1.34255	-0.6412	-0.407986	0.472615	0.103808	0.197449	-1.55924	-1.16795	-1.17185	-1.30416	-2	-1.6952	-1.86219	-1.36333	-1.58569	-0.904692	-0.573334	-1.36456	-1.55591	-1.37381	-1.92026	0.400285	-0.698119	-1.18321	-1.9079	-1.2317	-0.283128	-1.46999	-1.10124	-1.5932	-0.524711	-1.6552	-1.58453	-1.58488	1.26852	-1.47195	-0.932717	-0.0911532
RNA18S5--chr22-KI270733v1-random--+	-0.208461	-0.850579	-0.850579	-0.850579	0.286456	0.549936	0.628053	-0.14444	1.03644	0.0812263	1.29038	-0.850579	1.7636	0.825718	-0.850579	-0.850579	-0.850579	-0.850579	0.0207476	0.422277	0.342027	-0.0280052	-0.850579	-0.157027	-0.850579	-0.271718	-0.0412236	-0.850579	1.28653	-0.850579	-0.850579	-0.850579	0.399554	-0.850579	0.0375225	-0.507418	-0.850579	0.551044	-0.196295	-0.193976	1.0115	0.604609	-0.850579	-0.850579	-0.169364	2	-0.850579	1.6925	0.342057
RNA28S5--chr21--+	0.362497	-1.03436	-1.03436	0.0259971	0.127186	-1.03436	-1.03436	-1.03436	-1.03436	-1.03436	-0.00893864	-1.03436	-1.03436	-0.265109	-1.03436	-1.03436	-1.03436	-1.03436	-1.03436	-0.727748	-0.513187	-1.03436	0.471313	-0.117755	-1.03436	-1.03436	-0.418865	-0.339888	-1.03436	-1.03436	-1.03436	-1.03436	-0.0836646	-0.218032	-1.03436	-0.186667	0.804783	0.0315391	-1.03436	-1.03436	-0.537201	-1.03436	-1.03436	-1.03436	-0.516313	1.3257	-1.03436	-0.0892554	-1.03436
RNA28S5--chr22-KI270733v1-random--+	-0.521122	0.509196	-0.521122	-0.521122	-0.521122	-0.521122	0.499102	0.302135	-0.521122	-0.521122	-0.521122	-0.521122	-0.521122	-0.521122	-0.521122	-0.521122	-0.521122	-0.521122	-0.521122	-0.0510674	-0.521122	0.00814216	-0.521122	-0.521122	-0.521122	-0.521122	0.422471	-0.521122	-0.521122	-0.521122	-0.521122	0.716756	-0.521122	-0.521122	-0.521122	-0.521122	-0.521122	-0.521122	-0.521122	0.244383	-0.521122	-0.521122	-0.521122	-0.521122	-0.521122	-0.521122	-0.521122	0.315892	-0.521122
RNASEH2C--chr11---	-0.526302	-0.526302	2	-0.526302	0.354149	-0.526302	-0.526302	-0.526302	-0.526302	-0.526302	-0.526302	-0.526302	-0.526302	2	-0.526302	-0.526302	-0.526302	-0.526302	-0.526302	-0.526302	0.402647	-0.526302	-0.526302	-0.526302	0.612624	0.258336	-0.526302	-0.526302	-0.526302	2	-0.526302	-0.526302	-0.526302	-0.526302	-0.526302	0.334784	-0.526302	-0.526302	0.360571	-0.526302	-0.526302	1.44618	-0.526302	-0.526302	-0.526302	-0.526302	-0.526302	-0.526302	-0.526302
RNASEK--chr17--+	-0.322848	-0.888942	1.99738	0.732687	-0.888942	-0.888942	1.42691	-0.266407	-0.888942	-0.888942	0.29981	-0.888942	-0.888942	0.00283643	-0.888942	-0.888942	2	2	1.14399	0.60377	-0.284756	-0.163757	0.856557	0.361714	-0.148188	0.335914	-0.888942	-0.888942	0.995145	2	-0.291577	0.0471237	-0.888942	-0.888942	-0.888942	-0.58641	-0.888942	-0.888942	-0.312122	-0.888942	-0.888942	1.12328	-0.439298	-0.888942	-0.888942	-0.888942	-0.888942	-0.888942	-0.888942
RNF181--chr2--+	-0.511777	-0.511777	2	-0.511777	-0.511777	-0.511777	0.671242	-0.511777	-0.511777	-0.511777	-0.511777	-0.511777	-0.511777	0.855715	-0.511777	-0.511777	-0.511777	-0.511777	0.666162	0.0332837	1.1005	-0.511777	2	0.42583	-0.511777	0.874657	-0.511777	0.72278	2	-0.511777	-0.511777	2	-0.511777	-0.511777	0.688839	-0.0478604	-0.511777	-0.511777	-0.511777	-0.511777	-0.511777	1.45548	0.177727	-0.511777	-0.511777	-0.511777	-0.511777	-0.511777	-0.511777
RNF213--chr17--+	-0.461119	-0.461119	-0.461119	-0.461119	-0.461119	-0.461119	-0.461119	-0.461119	-0.461119	-0.461119	-0.461119	-0.461119	-0.461119	-0.461119	-0.461119	2	-0.461119	-0.461119	0.663078	0.0590741	0.423097	-0.461119	-0.461119	0.433711	-0.461119	-0.461119	0.583122	1.51869	-0.461119	-0.461119	-0.461119	-0.461119	-0.461119	-0.461119	0.684722	0.686581	-0.461119	-0.461119	-0.461119	-0.461119	-0.461119	-0.461119	0.196927	-0.461119	0.417794	-0.461119	-0.461119	-0.461119	-0.461119
RNH1--chr11---	-0.484326	0.772309	2	-0.484326	0.439293	0.684998	0.759997	-0.484326	-0.484326	-0.484326	-0.484326	-0.484326	-0.484326	0.954029	-0.484326	-0.484326	-0.484326	-0.484326	-0.484326	0.0889799	-0.484326	-0.484326	-0.484326	-0.484326	-0.484326	-0.484326	-0.484326	-0.484326	2	-0.484326	-0.484326	-0.484326	-0.484326	1.04205	0.778506	-0.484326	-0.484326	-0.484326	-0.484326	-0.484326	-0.484326	-0.484326	-0.484326	-0.484326	-0.484326	-0.484326	-0.484326	-0.484326	-0.484326
RPL10--chrX--+	0.0331753	-1.33621	-0.312271	0.318898	-0.947644	-0.579355	0.152359	-0.603656	-1.09266	-1.29202	0.10325	-0.301172	-1.63541	-0.231156	-2	0.114442	-0.637874	0.486586	-0.669949	-0.0153697	-0.0759239	0.270155	0.215005	-0.344793	-0.123473	-0.0468164	-0.742733	-1.02185	-0.944805	0.122897	-0.190218	0.37235	-1.85966	0.349686	-0.155597	-0.76404	0.408049	-1.39344	-0.620992	-0.733177	-0.226708	-0.534933	0.201603	0.0239163	-0.984868	-1.44323	0.103908	-0.426075	-2
RPL10A--chr6--+	-0.222568	-1.08349	0.312144	0.0197218	-0.517555	-0.781746	0.0922397	-0.884416	-0.497678	-1.05542	-0.0204361	-1.59951	-1.59951	0.25694	-1.59951	-0.439644	-1.59951	0.793809	-1.09074	-0.610861	-0.667876	0.0253899	-1.59951	-0.148683	-1.10889	-0.195529	-0.53471	-0.206351	0.232289	1.28077	0.178326	0.314684	-1.59951	0.160592	-0.453599	-0.232636	0.427194	-1.11891	-0.511561	-0.508634	0.03617	-0.266785	0.761107	-0.153647	-0.477806	-1.59951	0.235669	0.0165072	-1.59951
RPL11--chr1--+	-0.0871119	-0.61367	-0.977723	0.497865	-0.585075	-0.340868	0.580067	-0.601022	-1.17741	-0.709182	1.00194	-2	-1.27293	-0.469273	-2	0.571075	-2	0.425909	-0.947867	-0.36417	-0.531629	0.864752	0.235499	-0.267076	0.0201968	-0.52879	-0.57518	-0.729585	-0.130855	0.714324	0.134404	0.729818	-2	1.04942	-0.75744	-0.476062	-0.88624	-1.19872	-0.405538	-1.58232	-0.0109023	-0.197591	0.489137	-0.85457	-0.866304	-2	0.142938	-0.392686	-0.8608
RPL12--chr9---	0.142725	-1.2608	0.445636	0.410594	-0.720228	-0.972578	0.566	-0.841988	-1.75369	-1.23399	0.366792	-0.262774	-0.295679	-0.321414	-1.75369	0.254319	-1.75369	0.532366	-0.292916	-0.183181	-0.677383	0.863571	0.520074	0.0608802	-0.0487774	-0.307285	-0.535276	-0.245409	-0.561756	0.32292	0.036475	0.94807	-1.75369	0.350518	0.129577	-0.513613	0.844463	-0.0705982	-0.190515	-0.711706	-0.558964	0.615771	0.270538	-1.75369	-1.75369	-0.577391	1.20247	-0.0977043	-0.37897
RPL13--chr16--+	-0.329251	-0.544972	-0.347981	0.573932	-0.686584	-0.942482	0.856167	-0.605133	-0.741082	-0.822251	0.276743	-2	-1.02858	-0.399739	-2	-0.0758492	-2	0.576459	-0.242194	-0.324625	-0.712729	0.289668	-0.0805469	-0.330569	-0.154686	0.0721638	-0.731603	-0.719042	-0.760778	1.2091	-0.17502	1.04618	-1.72704	0.394739	-0.747129	-0.636487	0.540628	-0.941639	-0.259674	-0.604332	-0.363738	-0.327875	0.450046	-0.204006	-0.71851	-0.778071	-0.167045	-0.32328	-0.431055
RPL13A--chr19--+	-0.103029	-0.710421	-2	-0.00339108	-0.25562	-0.202507	0.249438	-0.748389	-2	-0.0611729	0.404931	-0.515588	-2	-1.08126	-0.350417	0.0105078	-2	-0.349394	-0.0294936	-0.265971	-0.0321212	-0.25989	-0.360508	-0.0189467	-0.071042	0.164702	-0.619814	-0.497921	-0.819775	-2	0.22849	0.20779	-0.582959	0.324183	-0.705683	-0.704118	0.324106	-0.777398	-0.248022	-0.0789275	-0.341675	-2	0.708883	-2	-0.780701	-0.835682	0.125646	-0.347644	-0.937392
RPL13AP5--chr10--+	-0.272365	-0.893113	-0.893113	1.53169	-0.265184	0.460793	1.34309	-0.893113	-0.893113	-0.893113	0.410408	-0.893113	-0.893113	-0.893113	-0.893113	1.02719	-0.893113	-0.893113	-0.050784	-0.180035	0.259803	0.892625	-0.893113	0.47829	-0.0808415	0.746691	-0.110693	-0.0102973	-0.893113	-0.893113	1.47144	-0.893113	-0.893113	-0.893113	0.5548	-0.561372	1.44482	-0.893113	0.592236	0.596528	0.212418	-0.893113	1.24119	-0.893113	0.253659	-0.893113	1.17753	-0.893113	0.259832
RPL14--chr3--+	-0.0985049	-0.999863	-0.529331	0.716519	0.108666	-1.41402	0.375434	-0.103743	-1.92308	-1.34625	0.735966	1.15928	-1.92308	-0.885379	-1.92308	-0.0941635	-1.92308	-0.0869568	-0.495601	-0.566179	-0.397264	0.68704	0.841339	-0.123882	0.216708	-0.317669	-0.38197	-0.248991	-1.92308	0.381817	0.327139	0.39775	-1.14919	0.275129	-0.995903	-0.47394	-1.92308	-0.779012	-0.0776206	-0.184213	0.0226963	-1.02226	0.204062	-1.92308	-1.18874	-1.92308	0.431283	-0.2098	-1.92308
RPL15--chr3--+	-0.62465	-1.14916	0.636191	0.456113	-0.613409	-0.100188	0.616137	-0.682293	-1.3487	-0.392672	0.984654	-2	-0.469743	0.154075	-2	0.126961	-2	-2	-0.303302	-0.11349	-0.883862	0.0144031	0.650555	-0.03572	-0.692821	0.038818	-0.948123	-0.607844	0.544441	-0.456654	-0.209205	1.30281	-1.29512	0.461451	-0.864067	-0.949181	0.461369	-1.20346	-0.247696	-0.751337	0.249891	-0.319164	0.144558	0.0895601	-0.716749	-2	-2	-0.0431605	-1.32991
RPL17--chr18---	-0.462908	-0.59086	-0.631794	0.356858	-0.452771	-0.653278	0.131596	-0.377479	-1.80776	-1.80776	0.959969	-1.80776	-1.80776	0.0961405	-1.80776	-0.770232	-1.80776	-0.258544	-1.03834	-0.519906	-0.120157	0.425322	-0.773625	-0.15083	-0.826555	0.164346	-0.248073	-0.395259	-1.80776	0.136982	-0.3115	-0.0954639	-1.80776	0.162827	-1.02546	-0.646432	-0.544589	-1.80776	-1.00523	-1.46481	-0.166025	-0.615605	0.51446	0.0404516	-0.80437	-1.80776	-1.80776	-0.362192	-0.520339
RPL18--chr19---	-0.944724	-0.22713	0.690732	0.604534	-0.532174	-0.93929	-0.514389	-0.71263	-1.94525	-1.94525	0.394476	-1.94525	-1.94525	0.147647	-1.94525	-0.863244	-1.94525	0.287411	-0.518594	-0.300833	-0.602664	0.558408	0.815643	-0.362112	-0.408233	0.0562119	-0.445442	-1.10941	-0.781155	0.462126	-0.0370454	0.873445	-1.26429	0.490486	-1.94525	-0.498288	0.992713	-1.49691	-0.644197	-0.641061	-0.322213	-0.141871	-0.0196348	-0.596445	-0.898844	-0.796425	0.39518	0.228982	-1.29561
RPL18A--chr19--+	-0.278381	-1.77506	0.51713	0.395479	-0.887215	-0.701553	0.170569	-0.824864	-1.77506	-1.23342	0.721778	0.41419	-1.77506	-0.0908749	-1.77506	-0.6204	-1.77506	0.607523	-0.0955952	-0.341812	-0.213693	-0.157451	0.594712	-0.401217	-1.28665	-0.634773	-0.5052	-0.388153	-1.77506	-0.242912	-0.497633	1.04078	-1.04838	0.639061	-0.415924	-0.482623	1.16634	-1.77506	-0.691995	-1.10773	-0.387418	-0.448316	0.436906	-0.335685	-0.658391	-1.77506	-0.530001	-0.812062	-1.0818
RPL19--chr17--+	-0.520361	-0.856144	-0.342826	0.519799	-0.963569	-0.483045	0.13847	-0.755484	-1.49132	-1.61625	0.0868009	-0.669461	-1.19168	-0.260144	-2	-1.04286	-2	-0.510219	-1.07175	0.0134154	-0.918343	0.571854	0.481534	-0.709841	-1.34694	-0.379098	-1.13138	-0.372868	-0.0584255	-0.0984964	-0.218179	0.634027	-1.44318	0.308384	-1.30854	-0.627011	0.80969	-2	-0.599019	-0.821086	-0.502823	-0.322812	0.260885	-0.776552	-0.923484	-0.976165	-0.414037	-0.234435	-0.782735
RPL21--chr10---	-0.15989	-0.303222	0.249178	-0.0438459	-1.00112	-1.18525	0.506077	-0.342372	-0.56231	-0.474066	-0.0840863	-1.6664	-0.664308	-0.685601	-1.6664	-0.504156	-1.6664	-1.6664	-0.535248	-0.473202	-0.732858	-0.27964	-1.6664	-0.527077	-0.567249	-0.518624	-0.209796	-1.13209	-0.415979	0.51211	-0.235275	-0.346936	-0.93495	0.264964	-0.790065	-0.365474	-1.6664	-1.6664	-0.576221	-0.994685	-0.0273638	-0.814973	0.509777	0.805362	-0.972328	-1.6664	-0.413163	-0.939251	-0.537257
RPL21--chr13--+	-0.096254	-0.747582	1.53617	-0.747582	-0.0887192	-0.747582	-0.747582	-0.0313142	-0.747582	0.836361	0.620154	-0.747582	0.989675	-0.747582	-0.747582	-0.747582	-0.747582	-0.747582	-0.747582	0.000624217	-0.0524265	-0.2871	2	-0.364989	0.104704	0.29268	1.10217	-0.747582	-0.747582	-0.747582	-0.747582	-0.747582	-0.747582	0.34126	-0.747582	-0.747582	-0.747582	-0.747582	-0.0839132	-0.0815612	-0.747582	1.56761	0.18022	-0.747582	-0.747582	-0.747582	-0.747582	-0.747582	-0.747582
RPL22--chr1---	-0.537673	-0.976554	-1.59283	1.01109	-0.105922	-0.304977	0.593384	-1.10041	-0.782803	-0.503895	0.598084	1.03354	-1.59283	-0.423873	-1.59283	-0.207621	-1.59283	-1.59283	-0.244677	-0.170729	-1.11492	0.849491	0.461875	0.0553243	-0.597628	0.335814	-0.629709	0.0709973	-1.59283	0.245237	0.11284	1.40162	-1.59283	1.03811	-0.224287	-0.815507	0.82763	-1.59283	-0.521372	0.076823	0.0718787	-0.578062	0.1885	-1.59283	-0.0545104	-1.59283	0.598894	-0.726182	-0.761151
RPL22L1--chr3---	0.219407	-0.58614	-0.58614	-0.58614	-0.58614	-0.58614	-0.58614	-0.58614	-0.58614	0.582825	-0.58614	-0.58614	-0.58614	0.682854	-0.58614	-0.58614	-0.58614	-0.58614	-0.58614	0.339224	-0.58614	-0.58614	1.89769	-0.58614	-0.58614	-0.58614	-0.58614	0.559493	-0.58614	-0.58614	-0.58614	0.745874	-0.58614	-0.58614	-0.58614	-0.58614	-0.58614	-0.58614	-0.58614	0.237579	0.848512	-0.58614	0.0537001	-0.58614	-0.58614	-0.58614	-0.58614	0.314526	0.910041
RPL23--chr17---	-0.147538	-1.19373	-1.19373	0.328866	-0.407561	0.0831816	0.622528	0.170966	-1.19373	-0.114046	0.978571	-1.19373	-1.19373	-1.19373	0.855815	0.179711	-1.19373	-1.19373	0.400643	-0.160596	0.140567	0.445023	-1.19373	-0.360357	-0.206984	0.162614	0.316738	0.193207	-1.19373	-1.19373	0.129175	0.365498	-1.19373	0.378671	0.422929	-0.04083	-1.19373	-0.624632	-0.131375	0.0980168	-0.132086	1.09538	0.678135	-1.19373	-0.373532	0.264527	-1.19373	-1.19373	-1.19373
RPL23A--chr17--+	-0.256041	-1.33857	-0.0847547	-0.0166687	-1.00093	-0.64269	0.510526	-1.15972	-0.812286	-0.983017	0.329749	-1.80215	-1.80215	-0.28229	-1.80215	-0.252362	-1.80215	-0.246255	-0.592532	-0.169136	-0.393124	-0.163515	-0.763556	-0.382234	-1.05353	0.0100393	-1.07766	-0.239856	-0.681095	0.150974	-0.649361	0.450379	-1.80215	0.376426	-0.410226	-1.33553	0.376355	-1.06691	-0.152544	-0.822129	-0.996703	-0.300301	0.318586	-0.503214	-0.969266	-0.6958	-0.67857	0.0198203	-0.789825
RPL24--chr3---	-0.290851	-0.440934	1.0965	0.813176	-0.733079	-0.514147	0.504642	-0.86683	-0.712223	-0.911624	0.46099	-1.86831	-0.266721	-0.294991	-1.86831	-0.0582712	0.441565	-0.0511389	0.294251	-0.0793475	-0.511021	0.947673	-0.0631392	-0.209952	0.3554	-0.395194	-0.181407	-1.30883	-0.559001	0.412797	-0.696109	-0.0348961	-1.86831	-0.021534	-0.0761991	-0.506117	0.258198	-0.736052	-0.041899	-0.551833	-0.405774	-0.469958	0.855565	-1.86831	-1.45096	-1.86831	0.0572401	-0.04925	-1.86831
RPL26--chr17---	0.040308	-0.899932	-0.392109	0.906521	-1.15642	-0.316913	0.712824	-0.154101	-1.52831	-0.850895	1.05285	0.248427	-1.23188	-0.594659	-0.55868	0.253816	-2	0.0515979	-1.36075	-0.142508	-0.333126	1.17947	0.248881	-0.281961	0.344131	-0.294908	-0.156539	-0.869743	-0.465671	-0.150395	-0.131465	0.574288	-1.48068	0.697455	-1.34749	-0.533495	-0.286126	-1.15903	0.00788747	-0.997297	-0.381226	-0.613127	0.301758	0.119193	-0.713914	-2	-0.462558	-0.208002	-2
RPL27--chr17--+	-1.06945	-1.4905	-0.0141558	0.154248	-0.744914	-1.4905	0.704318	-0.687442	-0.253129	-0.154233	-0.606318	-1.4905	-1.4905	-0.0660807	-1.4905	1.18865	-1.4905	0.454434	-0.919146	0.355959	-0.444265	-0.417289	0.44159	-0.319165	0.18466	-0.378217	-0.294716	-0.891684	-0.0891344	0.950988	-0.0494653	0.252559	-0.670752	-0.786612	-0.203627	-0.506991	-1.4905	-0.95078	-0.740067	-0.737698	0.0748657	0.680453	-0.0427968	-1.4905	-0.44936	-1.4905	-0.0859786	-0.180053	-0.708454
RPL27A--chr11--+	-0.536057	-0.5501	-0.0592451	0.898196	-0.316577	0.112263	0.771949	-0.45756	-0.294593	-0.911452	0.746691	0.918984	-1.5132	-0.110382	0.401071	1.58622	-1.5132	0.402236	-0.264724	-0.548254	-0.743031	0.434857	0.806283	-0.255706	0.136555	0.0395782	-0.990528	-0.923462	-1.5132	-1.5132	0.0663589	0.203424	-0.705881	0.433442	-0.545969	-0.793349	-1.5132	-1.5132	-0.520962	-0.771811	-0.310697	-0.57346	0.944221	-1.5132	-0.747136	-0.151189	-0.129978	-0.710629	-1.5132
RPL28--chr19--+	-0.574225	-0.69859	0.12055	0.49506	-0.564372	-0.603548	0.295474	-0.732559	-0.923392	-0.652307	0.499383	0.0306449	-0.55423	0.160194	-1.88138	-0.381499	-1.88138	0.199496	-1.13353	-0.50765	-0.325061	-0.0195537	0.385698	-0.405871	-0.584451	-0.253158	-0.95559	-0.863025	0.296669	0.00884841	-0.427061	0.795894	-1.24672	0.388765	-0.53428	-0.692951	0.226971	-0.943138	-0.208235	-0.665856	-1.30081	0.275415	-0.0866759	-0.0849756	-1.07532	-1.88138	-0.793983	-0.590329	-1.88138
RPL29--chr3---	-0.583856	-1.9554	-0.0512373	-0.206772	-0.573051	0.0300712	0.383486	-0.639262	-0.857888	-0.547321	1.20032	-0.400647	-0.959279	-0.106226	-1.9554	0.138589	-1.9554	1.1481	-0.274978	-0.199561	-0.277464	-0.669581	0.8306	-0.443842	-0.177486	-0.447063	-0.507476	-1.9554	-0.13078	0.615096	-0.532804	0.542093	-1.9554	0.556483	-0.813982	-0.410396	0.754002	-0.88051	-0.22153	-0.435918	0.0420778	-0.0298285	0.207809	-1.9554	-0.672381	-1.9554	-0.127414	-0.0249316	-1.9554
RPL3--chr22---	-0.313758	-0.852773	0.553806	0.689584	0.0139649	-0.362705	0.475521	-0.26733	-1.21844	-1.21467	1.15201	-0.230894	-0.623004	-0.319472	-0.817381	-1.53247	-0.227952	0.534675	-0.403792	-0.708552	-0.407178	0.302084	0.28055	-0.493999	-0.330802	-0.223979	-0.801402	-1.5182	-0.208395	-0.262291	-0.0713161	0.266703	-0.548499	1.14825	-0.247436	-0.513421	0.421547	-0.949228	-0.574994	-1.41371	-0.576121	-0.0726749	0.583866	-0.397442	-1.02843	-2	0.445276	-0.680139	-0.875325
RPL30--chr8---	-0.505997	-1.8598	0.445956	0.783816	-0.650664	-0.406055	0.607389	-0.407352	-1.71033	-0.860349	0.765421	0.0667019	-2	-0.776523	-0.740538	0.246753	-2	0.757425	-0.653143	-0.324297	-0.238484	0.684969	0.0671562	-0.463773	-0.382586	-0.304001	-0.259694	0.0215025	-1.18552	0.318502	-0.191694	0.333468	-2	-0.198332	-0.234833	-0.553749	1.17645	-1.14534	-0.0707162	-0.639947	-0.289063	-1.10733	0.545267	0.210551	-0.895798	-2	-0.6444	-0.318123	-2
RPL31--chr2--+	1.04294	-0.555795	0.426302	0.968481	-1.19037	-1.19037	1.35052	-1.19037	-0.356287	0.272909	0.751508	-1.19037	-1.19037	-0.464029	-1.19037	-1.19037	-1.19037	0.939432	-0.564711	0.485257	-0.69827	-0.376893	-1.19037	0.207853	-1.19037	-0.192741	-0.198645	-1.19037	1.0623	0.702294	0.724281	1.34273	-1.19037	0.0762978	-0.114897	-0.244912	-1.19037	-1.19037	-0.36861	-0.366015	-0.36921	0.448558	0.753611	0.587691	-0.701222	-1.19037	1.06646	0.453658	-0.333992
RPL32--chr3---	-0.73484	-1.41457	0.154053	0.689516	-0.724163	0.00151085	0.736266	-0.377987	-0.519137	-0.077415	0.537635	-0.205144	-0.817633	0.0178203	-2	0.171551	-2	0.629415	-0.981506	-0.552398	-0.333301	0.62599	0.166673	-0.39642	-0.58228	-0.253976	-0.317994	-1.14101	0.0734406	-0.227969	-0.209259	0.543662	-1.54282	0.169885	-1.16409	-0.696658	0.000452244	-1.03156	-0.0193086	-0.377155	-0.185355	0.175648	0.532077	-0.326223	-1.36332	-2	-0.185487	-0.284908	-1.18146
RPL34--chr4--+	-0.232873	-0.952063	0.427188	0.468517	-1.15137	0.0230722	0.199499	-0.376283	-1.79096	-0.912584	0.741625	-0.287285	-0.827564	-0.848035	-1.79096	-0.673597	-1.79096	-0.122537	0.382677	0.0590449	-0.893467	1.10693	0.502263	-0.461495	-0.203716	-0.687506	-0.242141	-0.448853	-0.0262852	0.303422	0.179601	0.531416	-1.79096	0.724372	-1.2914	-0.766164	0.545104	-1.00254	-1.14722	-0.582245	-0.743533	-0.97241	0.301179	-1.79096	-1.40777	-1.79096	-0.0230294	-0.0179852	-0.404476
RPL35--chr9---	-0.428974	-0.810115	1.61191	0.243853	-0.589014	-0.592791	0.44161	-0.515161	-1.01175	-0.24171	0.762951	-0.0875152	-1.72198	0.372789	-1.72198	-0.507428	-1.72198	1.22092	-0.539919	0.123879	-0.0796262	0.613466	0.474117	0.0550927	-0.349002	0.0659329	-0.0384447	-0.263135	0.196187	-0.110361	-0.0916391	1.23991	-0.957609	0.584827	-1.17897	-0.916913	-1.72198	-1.21872	-0.411453	-0.258028	0.199868	0.713111	-0.26143	1.17142	-1.30546	-1.72198	-1.72198	0.205209	-0.542019
RPL35A--chr3--+	-0.527759	-1.23545	0.523517	0.487397	-0.678236	-0.938355	0.977053	-0.297659	-1.74351	-0.167393	0.725918	-1.74351	-1.74351	-0.267146	-1.74351	-1.74351	-1.74351	-0.0383214	-0.417825	-0.666237	-0.469863	0.779313	0.321376	-0.459028	-0.452564	-0.48131	-0.949502	-0.861338	-1.74351	-0.228182	-0.337332	-1.1331	-1.02481	0.297943	-0.88245	-0.986545	-0.353165	-0.681026	-0.672334	-1.74351	-0.0305017	0.54609	0.491544	0.290776	-1.35188	-1.74351	-0.512119	-0.0365489	-1.74351
RPL36--chr19--+	-0.031977	-0.538717	1.00763	0.567514	-1.04727	-0.605952	0.047246	-0.527008	-1.75425	-0.248928	1.16162	-0.0921231	-1.75425	0.222631	-1.75425	0.786189	0.59003	-1.75425	-0.552185	0.061358	-0.554345	0.368691	0.780628	-0.643561	-0.16582	-0.389126	-0.20633	-0.800144	0.606658	1.56574	0.138917	0.812853	-1.75425	0.5916	-0.104372	-1.54088	0.403931	-1.24248	-0.595728	-0.796139	-1.34777	-0.335071	0.443838	-1.75425	-0.767016	-1.75425	-0.422447	-1.30785	-1.0127
RPL36A--chrX--+	-0.61928	-0.61928	1.99692	-0.61928	0.135495	-0.61928	0.397571	0.201256	-0.61928	-0.61928	-0.61928	-0.61928	-0.61928	1.32858	-0.61928	-0.61928	-0.61928	-0.61928	0.393204	-0.150779	0.17707	-0.61928	-0.61928	-0.180993	-0.61928	0.0533585	0.321194	-0.61928	-0.61928	-0.61928	0.752624	1.41141	-0.61928	-0.61928	-0.61928	-0.220526	-0.61928	-0.61928	0.141	-0.61928	-0.61928	1.07165	-0.0266245	-0.61928	-0.61928	-0.61928	-0.61928	-0.61928	-0.61928
RPL36AL--chr14---	-0.438151	-0.175811	-1.24498	0.743095	-0.429829	-0.240939	-0.184936	-0.73874	-0.412228	0.215959	0.289889	-1.24498	-0.0171385	0.596065	-1.24498	-1.24498	-1.24498	0.881411	-0.188903	0.0983949	-0.38999	0.215637	1.32996	-0.380886	-0.642607	-0.0289212	0.321169	-1.24498	1.47713	1.42429	0.330501	0.371727	-1.24498	1.12147	0.657318	-0.44585	-1.24498	-1.24498	-1.24498	-0.14028	-0.42513	0.391325	0.467525	-1.24498	-0.394546	0.267034	-1.24498	-0.354019	-0.389968
RPL37--chr5---	-0.292326	-0.681071	0.430596	0.808874	-0.658599	-1.09829	0.476247	-0.847381	-0.434328	-0.340274	0.571234	-1.61113	-0.543043	-0.256437	-1.61113	-1.61113	1.49677	-1.61113	-0.692459	-0.0734623	-0.616107	0.12433	0.226381	0.00962939	-0.0179712	-0.744688	-0.47388	-1.04162	-1.61113	0.0326431	0.0517388	-0.204773	-1.61113	0.268731	-0.38725	-0.789999	-1.61113	-1.61113	-0.121559	-0.650162	0.349061	-0.187725	0.398131	-0.0668886	-0.871346	-0.295844	-0.275361	-0.577971	-1.61113
RPL37A--chr2--+	-0.506604	-1.66991	-1.66991	0.594747	-0.949796	-1.1491	0.449918	0.0643586	-0.934246	-0.136634	0.319872	-1.66991	-1.66991	-0.608267	-1.66991	-1.66991	-1.66991	0.208572	0.159924	0.113462	-0.659419	-0.269764	0.196167	-0.173061	-0.247768	0.182024	0.0739089	0.216298	-0.316423	-0.000582774	0.459282	0.406312	-0.052112	0.239176	0.0106051	-0.613878	0.960269	-0.782226	-0.696816	-1.25406	-0.945644	-0.224376	0.890522	-1.66991	-0.664341	-1.66991	-1.66991	-0.219878	-0.914582
RPL38--chr17--+	-0.5251	-1.05383	-1.05383	0.46076	-0.518983	-1.05383	1.33186	-0.0454126	-0.097364	0.231966	-1.05383	2	0.35642	0.326454	1.38697	-1.05383	-1.05383	-1.05383	-0.336367	-0.72184	-0.489522	-1.05383	-1.05383	-0.258394	-0.361969	-0.577186	-0.387395	-0.301882	-1.05383	1.11653	-0.0816782	1.41029	-1.05383	-0.169941	-1.05383	-0.771263	-1.05383	-1.05383	-0.111495	-0.108519	-0.515524	-1.05383	-0.0244539	-1.05383	-1.05383	-1.05383	-1.05383	-1.05383	-0.0717978
RPL39--chrX---	-0.872445	-1.32691	0.266592	0.231683	-0.867187	-1.32691	1.6168	-1.32691	0.382932	-1.32691	0.896752	0.565075	-1.32691	-0.140486	-1.32691	-1.32691	-1.32691	-1.32691	0.0413903	0.224463	-0.841864	0.454912	-1.32691	-0.322865	-1.32691	-0.343578	0.219268	-0.240859	0.185664	-1.32691	0.0272698	-0.0900381	-1.32691	0.569115	-1.32691	-0.537975	-1.32691	0.455675	-1.32691	-1.32691	-0.864213	0.28853	0.363759	1.17753	-0.487325	-1.32691	-1.32691	0.293557	-0.482806
RPL4--chr15---	-0.0310652	-0.539819	0.565788	0.525916	-0.729136	-1.2542	0.869248	-0.264219	0.27119	0.393105	0.476466	-1.2542	-1.2542	0.100852	-1.2542	-1.2542	1.79355	-1.2542	-1.2542	0.114496	-0.290146	0.239013	-1.2542	-0.473308	0.264366	-0.786275	-1.2542	-0.516002	-1.2542	0.876489	0.29245	-1.2542	-1.2542	0.171767	-0.536296	-0.535131	-1.2542	-1.2542	0.852812	-0.723431	-0.329769	-0.0778848	0.369364	0.747474	-1.2542	-1.2542	0.477247	0.0849966	-1.2542
RPL41--chr12--+	0.245075	0.2258	-1.0961	0.855807	-0.0882647	-0.367201	0.214518	-1.0961	-0.0665024	-0.270174	0.801585	-1.0961	-1.0961	0.389723	-1.0961	1.52262	-1.0961	-1.0961	0.209614	-0.188998	0.318133	1.13537	0.658838	-0.0277516	0.569016	0.407413	0.840259	-1.0961	0.798175	2	-1.0961	-0.154973	-1.0961	0.467481	0.643412	-0.108072	-1.0961	-1.0961	-0.0817134	-0.514106	0.554394	1.44161	1.65634	-1.0961	-1.0961	-1.0961	-1.0961	0.00546653	-1.0961
RPL5--chr1--+	0.0261898	-0.853816	0.373104	0.189043	-1.09769	-0.358965	0.555244	-1.03737	-1.08079	-1.8803	0.528323	-1.8803	-0.0809959	-0.112756	-1.8803	-0.513083	0.714724	-1.8803	-0.866385	-0.590557	-0.0315088	0.469712	-0.517554	-0.0172196	-0.121969	-0.924029	-0.376677	-0.824138	-1.8803	-0.0661071	-1.41392	-0.328137	-1.8803	-0.666146	-0.849413	-0.435959	0.508721	-0.915582	-0.82276	-0.819704	-0.237214	0.398439	-0.236164	-1.8803	-0.361962	-1.8803	-1.8803	0.0246148	-1.05942
RPL6--chr12---	-0.116653	-1.0709	0.909258	-0.0195114	-1.22247	-1.64285	-0.145771	-0.178307	-1.64285	-0.323977	-0.770178	-1.64285	0.447625	-0.557961	-1.64285	-0.35726	-1.64285	1.0099	-0.68947	-0.132586	-0.209041	0.158183	-1.64285	-0.113224	-1.09906	-0.0866835	-0.748995	-0.649745	-0.259726	0.766858	-0.619708	0.293926	-1.64285	0.308041	-1.06808	-0.371108	1.04493	-1.64285	-0.648449	-0.645575	-0.437725	-0.165663	-0.0968726	-1.64285	-1.64285	-1.64285	-0.256611	0.39706	-0.393873
RPL7--chr8---	0.1467	-1.21847	-1.21847	0.418207	-0.735714	-0.607288	0.500746	-0.0035514	0.184006	-0.0578924	0.791471	0.768302	-1.21847	-0.46667	-1.21847	-1.21847	-1.21847	-1.21847	-0.570881	-0.457865	-0.0326337	0.295764	0.253048	-0.322659	-0.157794	0.41329	-0.191985	-0.078008	-1.21847	-1.21847	0.763289	1.21804	-1.21847	1.4207	-0.558413	-0.963427	0.578955	-0.606736	0.166335	-0.365221	-0.732591	-0.13694	0.5569	0.621912	-0.712177	-1.21847	-1.21847	0.0128165	-1.21847
RPL7A--chr9--+	-0.295553	-0.945334	0.123751	0.487541	-0.923723	-0.732164	-0.10212	-1.10527	-1.83976	-0.617591	0.972758	-1.83976	-0.812593	-0.102093	-1.83976	-0.0678759	-1.83976	-1.83976	-0.956286	-0.824297	-0.682387	-0.0305991	1.03308	-0.768441	-0.983856	-0.82245	-0.74608	-1.29208	-1.83976	-1.83976	-0.692269	-1.20297	-1.09001	0.927132	-0.662768	-0.581231	-0.389342	-0.999154	-0.407254	-0.719296	-0.918889	0.145828	0.390872	-0.354677	-1.12832	-1.83976	-1.83976	-1.09442	-0.361497
RPL8--chr8---	0.304751	-1.65989	0.716161	0.27738	-0.974773	-0.816014	0.472264	-0.921963	-1.65989	-0.718985	0.233194	-1.65989	-1.65989	0.0859117	-1.65989	-0.462986	-1.65989	0.80986	-0.772278	-0.431109	-1.65989	0.726777	0.796581	-0.583554	-0.120591	-0.822742	-0.827697	-1.10964	0.230406	1.31238	-0.507026	0.718959	-0.906626	0.842552	-0.75742	-0.395468	1.14704	-0.815346	-0.220677	-1.26426	0.028024	0.0652234	0.347763	0.472227	-0.502367	-1.65989	0.233894	0.599335	-1.65989
RPL9--chr4---	-0.0211758	-1.55229	0.0778244	0.455531	-0.446416	-0.956896	-0.147798	-0.368753	-0.711272	-0.0768433	0.722462	0.383165	-1.55229	0.307041	0.593916	-0.114078	-1.55229	0.595222	-0.485728	-0.326386	-1.55229	-0.214859	-0.118781	-0.258954	-0.519011	0.188622	0.250177	-1.55229	-0.00496384	-1.55229	-0.407683	0.821282	-1.55229	0.630209	-0.131382	-0.745228	0.960792	-1.55229	-0.203255	-0.721081	-1.07896	-0.498696	0.606296	-1.55229	-0.402711	-1.55229	0.723303	-0.352808	-0.688792
RPLP0--chr12---	0.190321	-0.0928985	0.115365	1.04553	-1.00973	-0.888367	0.884916	-0.0796723	-1.46593	-0.811485	0.0377581	0.411561	-1.46593	-0.288594	-1.46593	-0.0707897	-1.46593	0.617267	-0.853962	-0.149847	0.0900603	-0.316427	0.60351	0.00617042	0.328315	0.587826	-0.185141	-0.0570805	-1.46593	-1.46593	0.0775455	1.01174	-1.46593	-0.22698	-0.41399	-0.541161	0.232628	-0.887845	-0.157296	0.368968	-0.158111	-1.46593	0.715054	-1.46593	-0.350779	-1.46593	-1.46593	-0.062326	-0.110523
RPLP1--chr15--+	-0.110125	-0.97396	-0.215349	0.0745062	-0.866853	-0.726459	0.561718	-0.40105	-0.84482	-0.163098	0.584949	0.254307	-2	0.530183	-2	-0.0375911	-2	0.603789	-1.46242	-0.162073	-0.155308	0.13754	-0.0422314	-0.446279	-0.33526	-0.649976	-0.37468	-0.823424	-0.290726	0.0287091	-0.127915	0.0971948	-0.941401	0.302586	-0.850691	-0.967813	0.257806	-0.725569	-0.785131	-0.646941	-0.532714	0.487476	0.0727274	-2	-0.905022	-1.37503	-0.532838	-0.147588	-0.817268
RPLP2--chr11--+	-0.667312	-1.49668	0.297845	0.0233377	-0.481022	-1.04594	0.538509	-0.600685	0.243965	-0.379696	-0.0143599	-0.0314469	-1.49668	0.0914375	-1.49668	-0.407884	-1.49668	-1.49668	-0.437011	-0.217601	-0.0243748	-0.379942	-0.411444	-0.517563	-0.714438	-0.421438	-0.497126	-0.397185	-1.49668	-0.0519277	-0.0351439	0.558268	-0.811455	0.155577	-0.420984	-1.14848	-1.49668	-1.04553	-0.869396	-0.652066	-0.188191	-0.699059	0.205406	-1.49668	-0.846471	-1.49668	-1.49668	-0.401279	-0.84297
RPS10--chr6---	-0.652153	-0.531377	-0.00127997	0.840307	0.00328649	0.0772135	0.147303	0.00636778	-1.18731	-0.300202	0.688437	-0.338592	-0.877883	0.0841042	-1.83952	0.454535	-1.83952	0.862939	0.240254	-0.0411447	-0.118261	0.458496	0.449513	-0.444411	-0.123158	0.163599	-1.38508	-0.977943	0.7906	0.251036	0.456022	-0.159258	-1.83952	0.390737	-0.349653	-0.591115	-0.481636	-0.42538	-0.793353	-0.262356	-0.499154	0.0193876	0.430441	-1.83952	-0.461207	-1.83952	0.794299	0.0241149	0.283482
RPS11--chr19--+	-0.0337348	-0.691592	-1.59714	0.670167	-0.669713	-1.09782	1.00646	-0.604582	-0.89183	-0.648977	1.13666	0.0260031	-1.59714	0.333374	-1.59714	-0.391002	-1.59714	0.203841	-0.00681166	-0.0999944	-0.628341	0.092586	-1.59714	-0.0884328	-0.233673	-0.264033	0.216013	-0.37915	-1.59714	0.00331511	0.351793	-0.227845	-1.59714	0.233182	-1.05789	-0.175735	-1.59714	-0.746081	-0.664195	-0.661499	-0.296456	0.141283	0.763473	-1.59714	-0.257684	-1.59714	-1.59714	0.0833489	-0.425353
RPS12--chr6--+	-0.378748	-0.934471	-0.397851	1.10172	-1.21603	-0.77306	0.898415	-0.129624	-0.978169	-0.449471	0.792646	-0.490341	-2	-0.118675	-2	0.630491	-0.48824	-0.316636	-0.100255	-0.178516	-0.690189	0.577008	0.0443972	-0.196281	0.0178351	-0.0337139	-0.442389	-0.776318	-0.21667	0.507228	0.13879	0.346081	-1.80443	0.81745	-0.34069	-0.928013	-0.288371	-1.30218	-0.594484	-0.590906	-0.0847709	-0.377345	0.4161	-0.609285	-1.17527	-2	-0.471031	0.237307	-0.482584
RPS13--chr11---	0.0349804	-0.770534	-0.0354066	0.221035	-0.67171	-0.830799	0.529711	-0.598884	-0.808384	-0.178539	0.848837	0.238976	-0.905541	-0.428828	-1.86008	-1.86008	0.241218	0.424344	-1.37446	-0.416884	-0.252189	-0.0624188	0.14171	-0.351468	-0.813088	-0.00147341	-0.325501	-1.00486	-0.111629	0.215047	0.0923646	1.13156	-1.86008	0.353717	-0.76631	-0.844705	0.960142	-1.86008	-0.10743	-1.00127	-0.298825	-1.86008	0.0550117	-1.86008	-1.19894	-1.86008	-1.86008	-0.936756	-1.19538
RPS14--chr5---	-0.309198	-1.27242	0.259873	0.43913	-0.567384	-0.321778	0.665042	-0.336637	-1.02757	-1.22837	0.354689	0.334213	-1.4011	-0.00686397	-0.736219	-1.25569	-2	0.742998	-0.776068	-0.191859	-0.513451	0.277388	0.381698	-0.462917	-0.382746	-0.158554	-0.724611	-0.384646	-1.17563	0.857273	0.100269	0.677748	-2	0.210187	-0.756991	-0.589436	0.554391	-0.972967	-0.289532	0.147358	0.0171375	-0.0540352	0.533495	-0.431156	-1.13905	-1.19053	0.355402	-0.389873	-1.67738
RPS15--chr19--+	-0.303882	-1.32185	0.812968	0.727561	-0.798755	-0.440358	0.205109	0.0583825	-1.1719	-0.956039	-1.07108	0.233846	-0.874466	-0.235092	-1.79881	0.14429	-1.79881	-0.198018	-0.239475	-0.33841	-0.603139	0.476777	0.6113	-0.23021	-1.02858	-0.306153	-0.619781	-0.511106	-0.645405	0.586461	-0.478722	0.518719	-1.79881	-0.0172959	-0.739639	-0.598819	0.932199	-1.35459	-0.793214	-0.506597	-0.510424	-0.0119908	0.497485	-0.462391	-0.762014	-1.79881	0.732871	-0.426306	-0.468528
RPS15A--chr16---	-0.266725	-1.20175	0.357607	0.379625	-1.1827	-0.519475	0.745318	-1.12601	-0.713163	-0.395381	0.157959	0.369707	-0.0353227	0.446033	-1.98993	-0.428518	-1.98993	-1.98993	0.130549	-0.344668	-0.369765	0.732775	0.370153	-0.189611	0.0901404	0.151366	-0.30182	-0.288856	-0.860467	-0.0221568	0.222964	0.570228	-1.98993	0.583707	-0.952744	-0.814847	1.01129	-1.55493	-1.1779	-0.24463	-0.728287	-1.22086	0.563286	-0.681251	-1.1508	-1.98993	0.0200741	-0.527241	-1.98993
RPS16--chr19---	0.0763863	-0.767733	0.393588	0.929252	-0.280018	-0.439437	0.731893	-0.587857	-0.255373	-0.997486	0.599208	-0.348244	-1.9095	-0.217307	-1.9095	0.193245	-1.9095	-1.9095	-1.4006	-0.397134	0.149369	-0.147685	-0.188626	0.122227	-0.00150129	0.174132	-1.10286	-1.37614	-0.661331	-0.370067	0.535966	0.598436	-0.736466	0.702152	-0.359749	-0.683904	0.117704	-1.42878	-0.168378	-0.511119	-0.387987	0.0241241	0.49445	0.157145	-0.78752	-0.677703	-0.65852	-0.424231	-1.21295
RPS17--chr15---	0.134735	-0.600048	-1.28138	1.19736	0.147188	0.142426	0.743818	0.463234	-0.385842	-0.562994	0.369211	-1.28138	0.734047	0.698472	-1.28138	1.49431	1.62534	-1.28138	0.496407	0.408509	0.618876	0.545893	0.990231	0.219858	-0.633591	-0.490719	0.124537	-0.577332	-1.28138	0.750724	0.927167	1.02577	-0.317577	1.04259	0.764343	0.336448	2	-1.28138	0.560092	0.158968	-0.0976062	0.478296	1.11267	-1.28138	-0.366828	0.344633	-1.28138	0.852343	-0.361905
RPS18--chr6--+	-0.236398	-2	0.311213	0.137954	-0.693088	-0.697219	0.134082	-0.428083	-1.81114	-0.261216	0.412461	0.278592	-0.788065	0.117606	-2	-0.172412	-2	0.253554	-0.474411	-0.329012	-0.403577	0.474688	0.614416	-0.391597	-0.192552	-0.155481	-0.232373	-1.0481	-0.834007	0.255272	-0.0641716	-0.116271	-2	0.486643	-0.189137	-0.560387	-0.668909	-1.97857	-0.449683	-0.82705	-0.138774	-0.1686	0.540744	-0.296203	-1.43551	-2	-0.831144	-0.080332	-1.43116
RPS19--chr19--+	-0.637968	-0.532949	0.634141	0.664128	-0.627486	-0.603117	0.268349	-0.247469	-2	-0.7425	0.0465308	-0.777219	-2	0.268377	-0.629411	-0.0599289	-2	0.574945	-1.15294	-0.139451	-0.577956	-0.158534	0.673183	-0.70817	-0.00157343	-0.649781	-1.43331	-1.11604	-0.541606	0.576709	-0.288821	0.195262	-0.837508	0.556441	-0.420001	-0.889627	0.604225	-1.19617	-0.461103	-0.918828	-0.922428	0.141538	0.43794	-0.337815	-1.01446	-1.06366	-0.538667	-0.167332	-2
RPS19BP1--chr22---	0.399219	-0.521018	2	0.651564	-0.521018	0.657502	0.73309	-0.521018	-0.521018	-0.521018	-0.521018	-0.521018	-0.521018	-0.521018	-0.521018	-0.521018	-0.521018	-0.521018	0.727705	0.0567966	-0.521018	-0.521018	-0.521018	0.472931	-0.521018	-0.521018	1.45831	-0.521018	-0.521018	-0.521018	-0.521018	1.00064	-0.521018	-0.521018	0.751745	-0.521018	-0.521018	-0.521018	0.416655	1.12427	0.415886	-0.521018	0.789839	-0.521018	0.45525	-0.521018	-0.521018	0.50788	1.18818
RPS2--chr16---	-0.185346	-0.284829	0.536363	0.369872	-0.551004	-0.35215	0.133501	-0.0930833	-0.77875	0.204908	0.181749	0.842868	-0.435642	0.301917	-1.50193	-1.50193	-1.50193	1.04994	-0.584807	-0.0491008	0.2942	0.150806	-0.269275	-0.0304755	-0.978818	-0.00494428	-0.998042	-0.546593	0.451217	0.139078	0.158141	0.956013	-0.251498	0.55316	-0.280111	-0.367684	-1.50193	-1.50193	0.120842	-1.50193	0.242105	0.280541	0.431367	0.701078	0.0263806	-1.50193	-0.168409	-0.470511	-0.759419
RPS20--chr8---	0.123479	-0.722602	-1.33002	0.393978	-0.280204	-0.367412	1.52867	0.225336	-0.531633	-0.256731	0.528748	-1.33002	-1.33002	-0.634764	-1.33002	-1.33002	-1.33002	0.708628	-0.317523	-0.0420794	-1.33002	0.743347	-1.33002	0.294455	-0.0388291	0.679817	-1.33002	-0.275334	-1.33002	-1.33002	0.351144	0.497026	-1.33002	-0.117563	0.277066	-0.718615	1.05567	-1.33002	-0.0493695	-0.270906	-0.0501674	-0.329834	1.03175	-1.33002	-0.00963543	0.119601	0.142177	0.0435695	-0.510292
RPS21--chr20--+	-0.553475	-1.30054	1.31708	0.161251	-0.286645	-0.754665	0.780538	-0.487589	-1.30054	-0.682002	0.120644	-1.30054	-1.30054	-0.629073	-1.30054	0.0180518	-1.30054	-1.30054	-0.722148	-0.8109	-0.241416	0.461638	0.0137397	-0.840156	-0.0535282	-0.916289	-0.763285	0.283272	0.781941	0.449133	-0.516826	-0.140488	-1.30054	0.477725	-0.711013	-0.426511	1.00352	-0.754172	-1.30054	-0.864684	-0.541418	-1.30054	0.164999	-1.30054	-0.848346	-1.30054	-1.30054	-0.200822	-0.50886
RPS23--chr5---	0.0757015	-1.46707	0.0834702	0.347574	-0.887509	-0.788653	0.726158	-0.61069	-1.25914	-0.978534	0.722187	-2	-0.553359	-0.579986	-0.693041	-0.358785	-2	-0.692093	-0.395831	-0.479184	-0.472675	0.683867	0.266477	-0.58372	-0.182484	-0.56536	-0.681559	-0.167995	-1.12772	-0.294147	-0.10229	0.468586	-2	0.369563	-0.476321	-0.668435	-0.0683592	-0.455894	-0.376375	-0.441612	-0.140373	-0.510957	0.457135	-0.391268	-0.335063	-2	-2	-0.0398885	-1.62405
RPS24--chr10--+	-0.517666	-1.35956	0.576226	0.243587	-0.50573	-0.477982	0.623865	-0.638541	-1.55023	-1.04358	0.381399	-0.0442081	-1.23158	0.198283	-2	-1.07332	-2	-0.506879	-0.291492	0.182408	-1.10605	0.735169	0.547802	-0.340691	-0.454374	-0.831586	-0.629822	-1.33462	-0.0264192	0.333562	0.199141	-0.684887	-2	0.363665	-0.269473	-0.743533	-0.214938	-1.74596	-1.14454	-0.494465	-0.499015	-0.096842	-0.071338	-0.790112	-1.82799	-1.00239	-0.404595	-0.302714	-0.796687
RPS25--chr11---	-0.555537	-0.751762	0.260758	0.522113	-0.125336	-0.803364	0.302338	-0.670367	-1.59887	-0.711897	-0.0627716	-1.59887	-1.59887	0.471596	-1.59887	-1.59887	-1.59887	0.0858825	-0.289072	-0.128027	-0.502728	0.689067	0.0747567	-0.256393	0.137462	-0.351796	0.0972689	-0.243627	-1.59887	0.911507	-0.209545	0.746235	-1.59887	0.11333	-0.270764	-0.850976	0.760057	-0.549119	-0.726133	-1.59887	-0.541191	0.0273612	0.352909	-0.192357	-1.21193	-1.59887	-1.59887	-0.463726	-0.502705
RPS27--chr1--+	-0.453844	-1.03296	0.419381	-0.452273	-0.444029	-0.447782	0.334996	-0.825795	-1.56994	-1.56994	0.55641	0.718522	0.0184982	-0.551382	-1.56994	-1.56994	-1.56994	-1.56994	-0.67485	-0.541126	-0.397351	0.0430884	0.220408	0.0748005	-0.702782	-0.377977	-0.730735	-0.637553	-0.271381	-1.56994	-0.234622	0.422024	-0.810329	-0.188104	-0.659866	-1.02943	-0.100455	-1.06981	-0.874559	-0.633639	-1.17271	-0.685733	0.075067	0.996975	-1.15602	-1.56994	0.339798	-0.35563	-1.56994
RPS27A--chr2--+	-0.578047	-0.999071	0.491005	0.456667	-0.241129	-0.450895	0.579181	-1.37632	-1.40892	-0.7583	0.501963	-0.62802	-2	-0.512202	-0.477646	-0.482728	-2	-2	-0.393722	0.0517178	-0.735672	0.365507	0.297968	-0.507529	-0.689251	-0.49837	-0.722908	-0.972726	-0.0474388	0.539331	-0.272209	0.664293	-2	0.506715	-0.638197	-0.860362	0.136448	-1.28491	0.0131029	-0.38105	-0.663174	-0.298648	0.255957	-0.729773	-0.740836	-2	-0.385326	-0.380694	-1.39288
RPS27L--chr15---	0.38506	0.366355	-0.916452	1.46888	-0.916452	-0.916452	0.752113	0.136967	-0.916452	0.426724	0.243382	-0.916452	-0.916452	0.952043	1.63328	-0.916452	-0.916452	-0.916452	0.350647	1.3109	0.989165	0.491343	1.61798	-0.319887	0.311106	-0.418539	0.271535	-0.130949	0.921802	2	0.973838	0.586739	-0.916452	1.03969	-0.916452	-0.370027	-0.916452	-0.916452	0.0679356	-0.916452	0.0672162	-0.916452	0.158861	-0.916452	0.103911	-0.916452	0.925942	1.05293	0.109404
RPS28--chr19--+	0.0561066	-1.12121	0.630597	1.0365	-1.12121	-0.481362	-1.12121	-0.168312	-0.217403	-1.12121	-1.12121	-1.12121	-1.12121	-1.12121	-1.12121	-1.12121	-1.12121	-1.12121	0.0249776	0.0414116	0.380321	-0.48118	-1.12121	-0.017416	0.625976	0.587071	-0.491465	0.439558	-1.12121	-1.12121	0.367501	0.947076	-1.12121	-1.12121	-1.12121	-0.8542	0.760504	-1.12121	-0.612123	-0.610318	0.736228	0.654714	0.441533	-1.12121	-0.591168	-1.12121	-1.12121	-1.12121	-1.12121
RPS29--chr14---	0.580993	-0.960789	-0.960789	0.209581	-0.00639091	-0.960789	-0.226265	-0.368074	-0.960789	-0.178655	-0.960789	-0.960789	-0.960789	0.446253	-0.960789	0.706551	-0.960789	-0.960789	0.661948	-0.622367	-0.385544	0.215059	-0.960789	-0.378639	-0.960789	-0.960789	-0.960789	-0.194266	-0.960789	-0.960789	0.0302075	1.5511	-0.960789	0.519888	0.296391	-0.025148	-0.960789	-0.960789	-0.4116	-0.409653	-0.41205	0.260659	0.0885413	-0.960789	-0.960789	-0.960789	0.837088	0.716666	-0.960789
RPS3--chr11--+	-0.801756	-0.116083	0.760948	-0.314434	-0.520736	-1.02884	-0.0156754	-0.906975	-0.775631	-1.27279	0.0635995	-0.366455	-1.75777	-0.102984	-1.75777	-1.75777	-1.75777	-1.75777	-0.557591	-0.696366	-0.359739	-0.0286829	0.111628	-0.919269	-0.589042	-0.318299	-0.80864	-1.28247	-0.645463	-0.385902	-0.761942	0.0783107	-1.75777	0.0904136	-0.736339	-0.80955	-1.75777	-1.02826	-1.16213	-1.16025	-0.958609	-1.00039	0.0821813	0.0839245	-1.40322	-1.75777	-0.642958	-0.117277	-1.13704
RPS3A--chr4--+	-0.241326	-1.44734	0.8643	-0.676871	-0.717713	-1.14534	0.612687	-0.641349	-1.28497	-1.05123	-0.38337	-1.96381	-0.962902	0.166423	-1.96381	-1.96381	-1.96381	-1.96381	-0.0127271	-0.522856	-1.26684	-0.267177	-0.806737	-0.0168826	-0.651517	-0.0149192	-0.354686	-1.06705	-0.130426	-1.96381	-0.679514	-0.214931	-1.96381	0.357525	-1.96381	-0.469617	-0.550474	-1.48279	-0.440542	-1.58009	-0.0386767	-1.11339	0.102157	-1.96381	-1.03591	-1.96381	-0.127043	-0.477622	-1.26683
RPS4X--chrX---	0.18422	-2	-0.693196	0.13594	-0.614751	-1.22594	-0.458171	-0.86705	-1.37552	-0.386365	0.277528	-0.429171	-2	0.179328	-2	-0.859132	0.257679	0.463387	-1.18049	-0.0975084	-0.715752	0.377061	0.145901	-0.623064	-0.336159	-0.0948251	-0.735057	-0.846912	-2	0.228281	0.250314	0.244394	-2	-0.0361671	-0.638903	-1.05883	-0.588669	-0.359811	-0.236365	-0.757458	-0.34896	0.390613	-0.236231	0.112578	-0.427619	-2	0.278308	-0.024742	-0.89455
RPS4Y1--chrY--+	-0.898993	-0.898993	-0.898993	-0.221715	-0.361319	-0.898993	-0.898993	-0.898993	-0.898993	-0.127674	0.217166	-0.898993	-0.898993	-0.061672	-0.898993	-0.898993	-0.898993	-0.898993	-0.898993	-0.0518651	0.0882087	-0.218092	-0.898993	-0.0993503	-0.898993	-0.898993	0.244259	0.371201	-0.898993	-0.898993	0.409619	-0.0200892	-0.898993	0.56121	-0.163851	-0.373145	-0.898993	-0.898993	-0.357398	-0.898993	-0.357842	0.990347	-0.898993	-0.898993	0.415304	-0.898993	0.874024	-0.898993	-0.898993
RPS5--chr19--+	-0.32385	-1.05899	0.368439	-0.271648	0.0794264	-1.58677	0.526477	-0.610544	-1.58677	-1.03029	0.840341	0.00966345	-1.58677	-0.289482	-1.58677	0.177623	-1.58677	-1.58677	0.280515	-0.694415	-0.633912	0.452263	1.08012	-0.102889	0.238806	-0.974306	-0.497712	-0.388822	-1.58677	-0.0126511	-0.27435	0.770984	-1.58677	0.384552	-0.692302	-0.800436	1.19526	-1.58677	-0.474035	-0.901156	0.380522	-0.717726	0.465326	0.52644	-0.638553	-1.58677	-1.58677	-0.0680356	-1.58677
RPS6--chr9---	-0.288022	-1.27416	-0.811139	0.181217	-0.60235	-0.649357	-0.272883	-0.804159	-0.457378	-0.707863	0.433952	-0.554242	-0.215013	-0.0956492	-2	-0.382921	-2	-2	-1.28528	-0.761124	-0.315201	0.490528	-2	-0.412164	-0.320513	-0.312045	-0.363618	-1.24789	0.430815	0.509607	-0.327892	-0.0336914	-0.959158	0.237024	-0.987153	-0.82821	-0.0682584	-1.32882	-0.727627	-1.04457	-0.367543	-1.29619	0.488104	-0.027121	-0.552732	-2	-0.268069	-0.373951	-0.681152
RPS7--chr2--+	-0.653675	-1.79756	-0.395461	0.527835	-0.317431	-0.647463	0.514722	-0.231362	-1.07418	-0.289882	0.381733	-0.132832	-0.169572	-0.444775	-1.79756	-0.56052	-1.79756	0.0495621	-0.166487	-0.43253	0.21456	0.534633	0.439199	-0.584916	-0.0403123	-0.575919	-0.082853	-0.548364	-0.466669	-0.156101	-0.013577	0.87659	-1.79756	0.676091	-0.864827	-1.24359	1.56137	-0.924696	-0.174342	-1.38866	-0.310917	-0.891338	0.623531	-0.255493	-0.601222	-1.79756	0.159727	-0.553015	-1.79756
RPS8--chr1--+	-0.508182	-0.813013	-0.164365	0.200959	-0.863151	-0.687418	0.270956	-0.0120858	-1.20315	-0.29066	0.0953086	-1.77439	-1.77439	0.115119	-1.77439	0.426181	-1.77439	0.592561	-0.486377	-0.157021	-0.110439	0.62164	-0.325401	-0.0991912	-0.271112	-0.0754982	-0.700073	-0.60105	-1.77439	-1.77439	0.28471	-0.914983	-1.77439	0.178982	-0.335884	-1.0368	-1.77439	-1.77439	-0.0846951	-1.01661	-0.858674	0.314841	0.213757	-1.77439	-1.43939	-0.737207	-0.721055	0.0694799	-1.18788
RPS9--chr19--+	0.403283	-0.671261	1.10276	0.42312	-0.579396	-0.436586	0.647656	-0.612021	-1.60818	-0.610001	1.0057	0.0373741	-2	0.30233	-2	0.239226	-2	0.247499	-0.885206	-0.0680597	-0.405282	0.622672	-0.480536	-0.700117	0.230974	0.0433485	-0.455496	-1.76509	-0.360057	0.0102496	0.0324835	1.04917	-0.728206	0.57263	-0.0874406	-0.663787	0.854859	-2	-0.0110675	-0.829381	0.0608902	-0.2504	0.504636	0.326893	-1.12837	-1.00958	0.0607326	0.026764	-1.58856
RPSA--chr3--+	-1.24062	-0.167172	0.379927	0.564779	0.0931096	-1.24062	-0.176334	0.180049	-0.404536	-1.24062	-1.24062	-1.24062	-1.24062	-0.0340586	-1.24062	-1.24062	-1.24062	-1.24062	-0.613458	-0.165113	-1.24062	-0.42519	-1.24062	-0.545298	-1.24062	-0.0196935	-0.658064	-0.136135	-1.24062	0.65658	-1.24062	-0.476378	-1.24062	0.0290851	-0.601384	-0.99362	1.74859	-0.231763	-0.416888	-0.414287	-1.24062	-0.193208	-0.134587	-1.24062	-0.386784	0.277447	0.301089	-0.346093	-1.24062
RRBP1--chr20---	0.797698	1.85263	-0.633585	2	0.192488	0.412243	1.24689	0.264461	0.843686	-0.633585	1.08126	-0.633585	-0.633585	-0.633585	-0.633585	1.89267	-0.633585	-0.633585	0.474542	0.304505	-0.633585	0.807191	-0.633585	0.899285	-0.633585	1.13335	-0.633585	1.31792	-0.633585	-0.633585	0.867913	1.58893	-0.633585	0.731589	0.495876	1.48701	-0.633585	1.7168	0.198514	0.826457	0.197831	1.21708	0.52968	-0.633585	0.875052	-0.633585	-0.633585	-0.633585	-0.633585
RSRC2--chr12---	-0.525642	-0.525642	-0.525642	-0.525642	-0.525642	-0.525642	-0.525642	-0.525642	-0.525642	-0.525642	-0.525642	-0.525642	-0.525642	-0.525642	-0.525642	-0.525642	-0.525642	-0.525642	-0.525642	-0.525642	0.321903	-0.525642	-0.525642	-0.0591783	0.51348	0.190238	-0.525642	-0.525642	-0.525642	-0.525642	-0.525642	-0.525642	-0.525642	-0.525642	-0.525642	0.574459	2	-0.525642	-0.525642	-0.525642	-0.525642	-0.525642	-0.525642	-0.525642	0.316819	-0.525642	-0.525642	0.362236	-0.525642
RSRP1--chr1---	-0.463463	-0.463463	-0.463463	-0.463463	-0.463463	-0.463463	-0.463463	-0.463463	-0.463463	-0.463463	-0.463463	-0.463463	-0.463463	1.01008	-0.463463	-0.463463	-0.463463	-0.463463	-0.463463	-0.463463	0.53487	-0.463463	-0.463463	-0.463463	0.76053	-0.463463	-0.463463	-0.463463	-0.463463	-0.463463	-0.463463	-0.463463	-0.463463	-0.463463	-0.463463	-0.463463	-0.463463	0.735547	-0.463463	-0.463463	0.488869	-0.463463	-0.463463	-0.463463	0.528882	-0.463463	-0.463463	-0.463463	-0.463463
RTF1--chr15--+	0.481879	-0.459095	-0.459095	-0.459095	0.492765	-0.459095	-0.459095	-0.459095	-0.459095	-0.459095	1.51687	-0.459095	-0.459095	-0.459095	-0.459095	-0.459095	-0.459095	-0.459095	-0.459095	0.13174	-0.459095	0.206163	-0.459095	-0.459095	-0.459095	-0.459095	-0.459095	-0.459095	-0.459095	-0.459095	-0.459095	1.09685	-0.459095	-0.459095	-0.459095	-0.459095	-0.459095	-0.459095	-0.459095	-0.459095	-0.459095	-0.459095	-0.459095	-0.459095	-0.459095	-0.459095	-0.459095	-0.459095	-0.459095
RTN4--chr2---	-0.602284	0.626227	-0.602284	0.53511	-0.602284	0.54087	0.61419	0.379336	-0.602284	1.56845	-0.602284	-0.602284	-0.602284	1.72797	-0.602284	-0.602284	-0.602284	-0.602284	0.608966	0.82035	-0.602284	0.541194	-0.602284	0.361838	0.565744	0.202404	0.522819	1.53083	-0.602284	-0.602284	-0.602284	0.873713	-0.602284	-0.602284	-0.602284	0.947268	2	-0.602284	0.307251	-0.602284	0.306505	-0.602284	0.106719	-0.602284	-0.602284	-0.602284	-0.602284	1.12533	-0.602284
S100A10--chr1---	-0.975575	-0.975575	-0.975575	-0.35147	-0.108267	-0.34831	0.152297	-0.436946	-0.0895395	-0.975575	-0.975575	-0.975575	-0.975575	-0.975575	-0.975575	-0.975575	-0.975575	-0.975575	-0.975575	-0.00466507	-0.452822	-0.975575	-0.975575	-0.687868	-0.334661	-0.193304	-0.975575	-0.278998	-0.975575	-0.975575	-0.0750086	1.52504	-0.975575	-0.156772	-0.298149	0.296315	-0.975575	-0.975575	-0.102629	0.199811	-0.103267	-0.975575	0.196537	0.913232	-0.0707268	-0.975575	-0.975575	-0.975575	-0.975575
S100A11--chr1---	-0.84308	-0.84308	-0.84308	-0.84308	-0.84308	-0.84308	-0.84308	-0.84308	-0.84308	-0.84308	0.0421437	-0.84308	-0.84308	-0.179002	-0.84308	-0.84308	-0.84308	-0.84308	-0.271053	-0.84308	-0.84308	-0.84308	-0.84308	-0.84308	-0.84308	-0.463057	-0.84308	-0.84308	0.559937	-0.84308	-0.84308	-0.146023	-0.84308	-0.84308	-0.84308	-0.84308	-0.84308	-0.84308	-0.413542	-0.84308	-0.84308	0.112253	-0.84308	-0.84308	-0.84308	-0.84308	-0.84308	-0.84308	-0.84308
S100A13--chr1---	-0.467109	-0.467109	2	-0.467109	-0.467109	-0.467109	-0.467109	0.472636	-0.467109	-0.467109	-0.467109	-0.467109	-0.467109	-0.467109	-0.467109	-0.467109	-0.467109	2	-0.467109	0.514539	-0.467109	0.137044	-0.467109	0.0348538	-0.467109	-0.467109	-0.467109	0.748206	-0.467109	2	-0.467109	0.945923	-0.467109	-0.467109	-0.467109	-0.0104225	2	-0.467109	0.403626	-0.467109	0.402912	-0.467109	0.211649	-0.467109	1.64591	-0.467109	-0.467109	-0.467109	-0.467109
S100A16--chr1---	-0.53278	-0.53278	2	0.542118	-0.53278	0.547561	-0.53278	0.394903	-0.53278	0.691369	-0.53278	-0.53278	-0.53278	0.79612	-0.53278	-0.53278	-0.53278	-0.53278	1.40249	-0.00310171	-0.53278	0.547867	-0.53278	-0.0372606	-0.53278	-0.53278	-0.53278	-0.53278	-0.53278	-0.53278	0.357394	-0.53278	-0.53278	2	0.633954	-0.0819559	-0.53278	0.548538	0.326778	-0.53278	0.326074	-0.53278	-0.53278	-0.53278	-0.53278	-0.53278	-0.53278	-0.53278	-0.53278
S100A4--chr1---	-0.545498	-0.545498	-0.545498	-0.545498	-0.545498	-0.545498	-0.545498	-0.545498	-0.545498	-0.545498	-0.545498	-0.545498	-0.545498	-0.545498	-0.545498	-0.545498	-0.545498	-0.545498	-0.545498	-0.545498	-0.545498	-0.545498	-0.545498	-0.545498	-0.545498	-0.545498	-0.545498	-0.545498	-0.545498	-0.545498	-0.545498	-0.545498	-0.545498	-0.545498	-0.545498	-0.545498	-0.545498	-0.545498	-0.545498	-0.545498	-0.545498	-0.545498	-0.545498	-0.545498	-0.545498	-0.545498	-0.545498	-0.545498	-0.545498
S100A6--chr1---	-0.79435	-0.79435	-0.79435	-0.79435	-0.79435	-0.79435	-0.291104	-0.79435	-0.79435	-0.79435	-0.79435	0.742948	-0.79435	-0.79435	-0.79435	-0.79435	-0.79435	-0.79435	-0.79435	-0.562486	-0.79435	-0.79435	-0.79435	-0.79435	-0.79435	-0.79435	-0.79435	-0.79435	-0.79435	-0.79435	-0.79435	-0.79435	-0.79435	-0.79435	-0.79435	-0.79435	-0.79435	-0.79435	-0.79435	-0.79435	-0.79435	-0.79435	-0.79435	-0.79435	-0.402595	-0.79435	-0.79435	-0.79435	-0.79435
SAA1--chr11--+	1.65801	2	2	2	1.09437	0.564008	0.620241	-0.0977439	2	0.67897	-0.0343952	2	0.929112	0.590123	-0.724841	0.292299	-0.724841	1.37397	0.876192	2	-0.114167	1.06852	1.99543	0.27224	2	1.51183	2	-0.724841	0.88155	2	2	2	-0.0847104	0.818675	0.280061	0.970797	1.66051	2	0.498215	0.888752	2	0.443887	-0.256478	0.543104	0.258832	-0.724841	0.371931	1.25896	2
SAA2--chr11---	1.18479	2	-0.569541	2	0.604048	0.31748	1.67162	0.465778	2	0.0206216	0.284471	2	-0.569541	0.492149	-0.569541	1.30165	-0.569541	1.30903	-0.569541	2	-0.135487	-0.282017	0.684444	0.193844	2	1.75766	1.87398	-0.569541	2	2	2	1.80494	-0.569541	-0.569541	-0.00705836	1.28506	0.962171	2	0.403596	-0.153679	2	1.24377	0.40369	-0.569541	1.56619	0.766252	-0.569541	1.04113	2
SAA4--chr11---	1.61142	1.49956	2	1.52478	0.466023	0.709997	0.525326	1.33172	-0.00600949	0.853828	1.79667	1.77228	0.985725	-0.799062	-0.799062	1.65899	-0.799062	2	1.48029	2	0.713481	1.01335	2	1.57597	2	0.54024	1.38169	-0.799062	2	2	0.701315	2	-0.799062	1.25896	1.36099	1.36315	2	-0.237116	0.66429	1.72466	1.3469	0.75924	0.572182	1.61679	0.876908	-0.799062	2	1.46704	0.518499
SAMSN1--chr21---	-0.394181	-0.394181	-0.394181	-0.394181	-0.394181	-0.394181	-0.394181	-0.394181	-0.394181	-0.394181	-0.394181	-0.394181	-0.394181	0.801832	-0.394181	-0.394181	-0.394181	-0.394181	-0.394181	-0.394181	-0.394181	-0.394181	-0.394181	-0.394181	-0.394181	-0.394181	-0.394181	-0.394181	-0.394181	-0.394181	-0.394181	-0.394181	-0.394181	-0.394181	-0.394181	-0.394181	-0.394181	-0.394181	-0.394181	-0.394181	-0.394181	-0.394181	-0.394181	-0.394181	-0.394181	-0.394181	-0.394181	-0.394181	-0.394181
SAP18--chr13--+	-0.839628	-0.839628	2	0.505717	0.257457	0.942281	1.03205	-0.158299	0.281146	-0.839628	1.22611	-0.839628	-0.839628	-0.839628	-0.839628	-0.839628	-0.839628	-0.839628	-0.839628	0.602093	-0.839628	-0.839628	2	-0.170444	-0.0289152	0.149891	-0.0587092	-0.839628	-0.839628	-0.839628	-0.185846	0.846545	-0.839628	-0.839628	-0.839628	-0.508523	-0.839628	-0.839628	-0.839628	-0.206095	-0.839628	0.564431	-0.839628	2	-0.182347	-0.839628	-0.839628	0.359488	0.311104
SARAF--chr8---	-0.57222	-0.57222	-0.57222	0.400498	-0.57222	-0.57222	0.468128	-0.57222	-0.57222	-0.57222	-0.57222	-0.57222	-0.57222	-0.57222	-0.57222	-0.57222	-0.57222	-0.57222	0.46366	-0.0928929	-0.57222	-0.57222	-0.57222	-0.123805	-0.57222	-0.57222	1.06974	-0.57222	-0.57222	-0.57222	-0.57222	0.690076	-0.57222	-0.57222	-0.57222	-0.164251	2	0.406307	-0.57222	-0.57222	-0.57222	-0.57222	0.515204	-0.57222	0.838058	-0.57222	2	-0.57222	-0.57222
SAT1--chrX--+	0.409238	0.434119	1.16201	0.993778	-0.301448	-0.884043	-0.513056	0.0727584	-0.282205	-0.196951	1.48754	-1.34889	-1.34889	0.448347	-1.34889	-0.226022	-1.34889	-1.34889	-0.25606	-0.109844	-0.446976	-0.0991865	-1.34889	0.239061	-0.0795539	-0.390038	-0.568174	-0.214988	-1.34889	-1.34889	0.0337497	0.882816	-1.34889	0.998764	0.304634	-0.406328	0.0181821	-0.556588	-0.295646	-0.134219	-0.138002	0.269516	0.0950805	0.0508545	0.163596	-1.34889	0.427754	0.215582	0.0444266
SAT2--chr17---	-0.647203	0.482089	-0.647203	1.70328	0.18282	-0.647203	0.471024	-0.647203	1.76412	-0.647203	-0.647203	2	-0.647203	1.49485	-0.647203	-0.647203	-0.647203	-0.647203	-0.647203	-0.647203	0.228541	1.44421	1.88283	0.239053	-0.647203	-0.647203	0.387032	-0.647203	-0.647203	-0.647203	1.37294	0.709587	-0.647203	-0.647203	1.26671	-0.208694	2	1.14386	2	-0.647203	0.188189	-0.647203	1.31638	-0.647203	0.868647	-0.647203	-0.647203	0.270215	-0.647203
SBDS--chr7---	-0.542319	-0.542319	-0.542319	0.500482	-0.542319	-0.542319	0.572985	-0.542319	0.938135	-0.542319	-0.542319	-0.542319	-0.542319	-0.542319	-0.542319	-0.542319	-0.542319	-0.542319	-0.542319	-0.542319	-0.542319	-0.542319	-0.542319	0.688886	-0.542319	-0.542319	-0.542319	0.621573	-0.542319	-0.542319	0.321274	-0.542319	-0.542319	-0.542319	0.589576	0.267326	-0.542319	-0.542319	-0.542319	0.920869	0.290889	-0.542319	-0.542319	-0.542319	-0.542319	-0.542319	-0.542319	0.372701	-0.542319
SCAF11--chr12---	0.283894	-0.570757	-0.570757	-0.570757	0.293781	0.523768	-0.570757	-0.570757	-0.570757	-0.570757	1.22394	2	-0.570757	-0.570757	-0.570757	-0.570757	-0.570757	-0.570757	-0.570757	-0.570757	-0.570757	0.0334717	-0.570757	0.352352	-0.570757	-0.570757	-0.570757	-0.570757	-0.570757	-0.570757	-0.570757	-0.570757	-0.570757	-0.570757	-0.570757	-0.114014	-0.570757	0.524758	-0.570757	0.303173	-0.570757	-0.570757	1.09315	-0.570757	0.335932	-0.570757	-0.570757	-0.570757	-0.570757
SCP2--chr1--+	0.130991	-0.675887	-0.675887	1.07622	-0.675887	-0.675887	1.18215	1.37821	2	0.495009	2	-0.675887	-0.675887	-0.675887	-0.675887	1.82021	-0.675887	-0.675887	0.419013	0.251006	0.185286	0.35775	-0.675887	1.10673	2	2	0.34114	-0.675887	-0.675887	-0.675887	2	-0.675887	-0.675887	-0.675887	0.440092	0.441903	-0.675887	0.358392	-0.675887	0.766727	0.145605	-0.675887	-0.0349896	-0.675887	2	-0.675887	-0.675887	0.226267	-0.675887
SDHD--chr11--+	-0.438408	-0.438408	-0.438408	0.715738	0.477839	-0.438408	-0.438408	-0.438408	-0.438408	0.875993	1.46363	-0.438408	-0.438408	-0.438408	-0.438408	-0.438408	-0.438408	-0.438408	0.790682	1.35708	-0.438408	0.201961	-0.438408	0.0936443	-0.438408	-0.438408	-0.438408	-0.438408	-0.438408	-0.438408	0.517396	-0.438408	-0.438408	-0.438408	-0.438408	0.457688	-0.438408	-0.438408	-0.438408	1.18101	-0.438408	1.61427	1.72916	-0.438408	-0.438408	-0.438408	-0.438408	-0.438408	-0.438408
SDS--chr12---	0.679479	-0.664388	2	1.00058	1.88172	-0.664388	1.65196	1.28755	1.58889	-0.664388	2	-0.664388	-0.664388	1.33727	-0.664388	2	-0.664388	-0.664388	-0.664388	-0.182948	2	0.317844	-0.664388	1.83842	-0.664388	0.560219	0.984808	1.16793	-0.664388	2	1.6203	0.603473	-0.664388	-0.664388	1.12408	0.397811	2	1.54245	0.116889	0.706481	1.8935	-0.664388	2	-0.664388	-0.664388	-0.664388	1.89327	0.819612	-0.664388
SEC11A--chr15---	0.263119	-0.576541	-0.576541	-0.576541	-0.576541	-0.576541	1.96007	-0.576541	-0.576541	-0.576541	2	-0.576541	-0.576541	-0.576541	-0.576541	-0.576541	-0.576541	-0.576541	-0.576541	0.38801	-0.576541	0.499091	-0.576541	0.686671	-0.576541	-0.576541	-0.576541	-0.576541	-0.576541	-0.576541	-0.576541	0.811881	-0.576541	-0.576541	-0.576541	-0.127809	-0.576541	-0.576541	-0.576541	0.924684	0.278327	1.32632	0.090395	-0.576541	0.97465	-0.576541	-0.576541	-0.576541	2
SEC11C--chr18--+	0.829906	-0.605541	-0.605541	1.17289	0.222935	-0.605541	1.28041	-0.605541	-0.605541	-0.605541	1.1143	-0.605541	-0.605541	2	-0.605541	-0.605541	-0.605541	-0.605541	0.505809	0.699759	0.268571	-0.0265161	1.91978	0.931789	-0.605541	1.89652	-0.605541	-0.605541	-0.605541	2	0.900325	1.62344	-0.605541	0.763605	-0.605541	1.07386	-0.605541	1.75168	0.228978	-0.605541	0.228294	2	0.561108	-0.605541	-0.605541	-0.605541	-0.605541	1.50751	0.915629
SEC61B--chr9--+	-0.106395	0.58897	1.69468	0.796197	-0.505322	-0.360469	1.57826	-0.45788	-0.0760824	-1.04983	1.21721	-1.04983	-1.04983	2	-1.04983	-1.04983	-1.04983	-1.04983	0.883221	0.520999	-0.050079	1.283	0.609913	0.139382	0.14652	0.965828	0.478873	-0.284297	-1.04983	1.15975	0.275417	1.90743	-1.04983	0.428936	-1.04983	-0.304135	0.977506	-0.359846	0.23819	0.751499	0.237328	0.863528	1.21966	1.91647	0.281175	-1.04983	-1.04983	0.869482	0.567934
SEC61G--chr7---	-0.663848	0.435004	-0.663848	1.62328	0.143802	-0.663848	0.424238	0.21417	0.780476	0.494765	1.01276	-0.663848	-0.663848	0.593908	-0.663848	-0.663848	-0.663848	-0.663848	-0.663848	0.253321	0.18829	-0.663848	1.79799	-0.194856	0.380905	0.0559119	-0.663848	-0.663848	-0.663848	-0.663848	0.17867	-0.663848	-0.663848	1.52955	-0.663848	0.442215	-0.663848	-0.663848	0.759138	0.152576	-0.663848	-0.663848	1.24681	2	0.183179	-0.663848	-0.663848	-0.663848	0.819083
SEC62--chr3--+	0.463213	-0.755396	-0.755396	0.754387	-0.755396	0.135033	1.34505	0.00921012	-0.755396	0.935441	0.704643	-0.755396	-0.755396	1.05969	-0.755396	-0.755396	-0.755396	-0.755396	-0.755396	0.0433039	-0.013327	1.24476	-0.755396	-0.0044193	0.789896	-0.128606	-0.755396	-0.755396	-0.755396	-0.755396	-0.0217046	2	-0.755396	1.15468	0.866373	-0.0675377	-0.755396	-0.755396	0.483785	-0.0444278	0.90719	0.820278	0.908464	-0.755396	-0.0177779	-0.755396	-0.755396	1.03846	-0.755396
SELK--chr3---	-0.608362	-0.608362	-0.608362	-0.608362	-0.608362	-0.608362	-0.608362	-0.608362	-0.608362	0.463383	-0.608362	-0.608362	-0.608362	1.89014	-0.608362	-0.608362	-0.608362	-0.608362	-0.608362	-0.608362	-0.608362	-0.086214	-0.608362	-0.174534	-0.608362	0.0574333	-0.608362	-0.608362	-0.608362	-0.608362	-0.608362	1.40167	-0.608362	-0.608362	-0.608362	-0.608362	-0.608362	1.00376	0.144183	0.14685	0.143566	1.06537	-0.608362	-0.608362	-0.608362	-0.608362	-0.608362	0.217398	-0.608362
SELM--chr22---	-0.466215	-0.466215	-0.466215	-0.466215	-0.466215	-0.466215	-0.466215	-0.466215	-0.466215	0.467398	-0.466215	-0.466215	-0.466215	0.547288	-0.466215	-0.466215	-0.466215	-0.466215	-0.466215	-0.466215	-0.466215	-0.466215	-0.466215	-0.466215	-0.466215	-0.466215	-0.466215	0.448764	-0.466215	-0.466215	-0.466215	-0.466215	-0.466215	0.609312	-0.466215	-0.466215	-0.466215	-0.466215	-0.466215	-0.466215	-0.466215	2	-0.466215	-0.466215	-0.466215	1.64695	-0.466215	-0.466215	-0.466215
SEPP1--chr5---	0.261209	-0.0177566	1.42171	1.20576	0.499769	-0.0911168	1.6354	0.989214	1.06499	0.732938	1.60382	0.936583	0.160971	0.532089	-1.22206	1.16369	1.82251	-1.22206	0.339092	0.145213	0.947002	0.563191	1.15728	1.19976	0.840871	0.55086	1.00139	0.397765	-1.22206	0.90641	0.753095	1.80537	-1.22206	1.64542	0.362703	1.33536	-1.22206	0.270334	0.282542	0.0222653	-0.298589	0.621063	1.46855	0.77753	1.09892	-1.22206	1.31594	0.115744	-0.258983
SEPT7--chr7--+	0.0582679	-0.647734	-0.647734	-0.647734	-0.647734	0.256421	0.978007	0.128659	-0.647734	-0.647734	-0.647734	2	-0.647734	0.464444	-0.647734	-0.647734	-0.647734	-0.647734	0.971923	-0.204437	0.105774	-0.647734	-0.647734	-0.233025	-0.647734	-0.0112821	-0.647734	-0.647734	-0.647734	-0.647734	-0.647734	0.519677	-0.647734	-0.647734	-0.647734	-0.647734	-0.647734	-0.647734	0.0716446	-0.647734	-0.647734	0.95223	-0.647734	-0.647734	1.09799	-0.647734	-0.647734	0.718692	-0.647734
SEPW1--chr19--+	0.164506	-0.547925	1.95007	0.359866	-0.547925	-0.547925	2	-0.547925	0.740857	-0.547925	0.948122	-0.547925	-0.547925	-0.547925	-0.547925	-0.547925	-0.547925	-0.547925	-0.547925	-0.100592	-0.547925	-0.0442444	-0.547925	-0.12944	-0.547925	-0.547925	0.350056	-0.547925	-0.547925	2	-0.547925	-0.547925	-0.547925	-0.547925	-0.547925	-0.547925	-0.547925	-0.547925	-0.547925	-0.547925	0.177409	-0.547925	0.466916	-0.547925	-0.547925	-0.547925	-0.547925	0.248629	-0.547925
SERBP1--chr1---	-0.694759	-0.694759	-0.694759	1.31191	0.0138506	-0.694759	0.259897	0.0755898	-0.694759	0.321776	0.776247	-0.694759	-0.694759	1.13396	-0.694759	-0.694759	-0.694759	-0.694759	-0.694759	1.34948	-0.694759	-0.199509	1.46519	0.85285	-0.694759	-0.0632618	0.811953	0.301486	-0.694759	-0.694759	1.02988	-0.694759	0.669049	-0.694759	-0.694759	-0.694759	-0.694759	0.203168	0.0190194	0.98628	-0.694759	-0.694759	-0.694759	-0.694759	1.03738	-0.694759	-0.694759	-0.694759	-0.694759
SERF2--chr15--+	0.854501	-0.0718539	2	1.20388	0.370385	0.0236948	1.44369	0.258622	-0.597398	-0.226966	1.6755	0.706273	-1.90647	0.622245	0.149911	0.92792	-1.90647	0.151163	-0.0895092	0.432223	-0.196579	1.21187	0.585205	0.601842	-0.134243	0.406981	0.439906	-0.0304187	-1.90647	1.15952	0.781528	1.81729	-1.03922	1.19564	0.436001	0.571521	0.974549	-0.62438	0.653081	-0.24548	0.566839	-0.323076	0.94893	-0.188658	-1.08354	-0.443349	2	0.280104	-0.567694
SERPINA1--chr14---	2	0.856232	1.26964	1.07147	0.263266	0.795642	1.29283	1.46998	-0.0322336	0.550318	1.16801	2	0.680429	0.463373	0.660862	1.14266	0.590797	2	1.25297	1.43632	1.18445	1.05193	2	1.75841	0.849972	1.38791	0.242946	0.309897	1.49905	1.89237	1.29501	2	-0.419239	1.20164	0.0163153	1.50112	1.75472	0.119897	0.946671	0.51657	1.45384	0.181853	1.19263	2	1.31471	-1.41625	2	0.747537	0.256498
SERPINA11--chr14---	1.96881	0.840261	1.632	0.139068	0.471181	1.58916	0.198324	0.989527	-0.713198	-0.713198	-0.713198	2	-0.713198	1.54952	-0.713198	2	-0.713198	-0.713198	0.821239	1.71753	0.000663412	0.466865	-0.713198	2	0.773355	1.05369	1.18633	1.37625	-0.713198	2	0.516598	1.63581	-0.713198	-0.713198	0.846924	1.47264	1.80592	0.746786	0.887261	0.482644	1.22641	0.802582	1.77501	-0.713198	1.84381	1.4837	2	0.581331	1.29699
SERPINA3--chr14--+	1.77918	1.16534	1.10154	0.917807	0.12525	0.92435	0.184929	1.1109	1.034	0.515514	1.46434	2	1.07139	-0.452868	-1.14786	1.32578	1.44255	2	0.837235	1.42037	0.834298	0.121291	0.876554	1.9762	1.34592	1.69359	0.743922	1.46431	1.79982	2	0.532664	1.56465	-0.288939	1.12008	0.458613	1.46438	1.70549	-1.14786	0.900374	1.68488	1.11544	0.420327	0.809643	1.75465	1.16899	-1.14786	0.323776	0.89213	0.545641
SERPINA6--chr14---	1.20937	-0.758711	1.65363	0.73526	-0.0627496	1.22005	-0.758711	-0.00211234	0.48588	0.914419	0.686038	-0.758711	-0.758711	0.325112	-0.758711	-0.758711	2	-0.758711	0.819653	1.42632	0.950833	0.994911	2	0.532723	1.64726	1.34315	0.721107	0.88542	2	2	1.29133	0.378936	-0.758711	0.39144	0.192852	1.02788	-0.758711	-0.758711	1.53783	0.471365	0.466597	0.800461	0.887724	1.89445	0.942506	-0.758711	1.53627	0.572877	1.88226
SERPINC1--chr1---	2	1.59413	-1.0418	0.682287	1.63741	1.76575	1.01481	1.86786	0.435578	0.18076	-1.0418	1.90687	1.00489	-0.249849	-1.0418	-1.0418	-1.0418	2	1.57203	0.888618	1.2169	0.553304	2	1.44184	0.958282	1.24756	0.907274	-0.326836	1.41435	1.02182	0.87318	2	-0.0630499	-1.0418	1.03566	0.790957	1.67569	0.405126	0.828236	1.42536	1.41906	-1.0418	0.357007	-1.0418	1.34965	-1.0418	-1.0418	0.255245	1.48786
SERPINF1--chr17--+	2	1.25408	-0.819699	0.0482406	0.386461	-0.819699	0.748826	0.91434	-0.819699	0.83678	0.610672	2	1.95341	-0.819699	-0.819699	-0.819699	-0.819699	-0.819699	0.742957	0.765362	1.22742	0.052883	-0.819699	1.24592	0.694192	0.979679	0.038861	0.808069	1.44734	-0.819699	-0.100917	2	-0.819699	0.319005	-0.819699	0.771357	-0.819699	-0.819699	0.394302	-0.123178	0.809103	-0.819699	-0.278663	1.80705	-0.0970698	-0.819699	-0.819699	0.498637	0.445443
SERPING1--chr11--+	1.65979	0.704938	1.15497	0.963744	1.05298	1.11992	0.885662	0.771989	0.163227	0.971326	-0.221922	1.507	0.683198	-0.462795	-1.18611	0.234298	-1.18611	2	1.20119	1.53384	0.576376	-0.0157875	1.38221	1.77136	0.64063	1.36495	1.09791	-0.53311	1.05717	1.97419	0.720561	1.15808	0.640486	0.440063	0.485835	0.907761	0.543211	0.135415	0.818027	1.17529	1.75576	-0.145558	0.945753	0.584541	1.1162	-1.18611	0.345502	0.792918	1.6795
SF3B1--chr2---	-0.521356	-0.521356	2	-0.521356	-0.521356	-0.521356	-0.521356	-0.521356	-0.521356	0.611817	-0.521356	-0.521356	-0.521356	-0.521356	-0.521356	-0.521356	-0.521356	-0.521356	-0.521356	-0.0310422	-0.521356	-0.521356	-0.521356	-0.0626625	-0.521356	-0.521356	-0.521356	-0.521356	-0.521356	-0.521356	-0.521356	-0.521356	-0.521356	0.784065	0.558669	0.251187	-0.521356	-0.521356	0.274322	-0.521356	-0.521356	-0.521356	-0.521356	-0.521356	-0.521356	-0.521356	-0.521356	-0.521356	-0.521356
SF3B5--chr6---	-0.539688	-0.539688	-0.539688	2	0.395077	-0.539688	-0.539688	-0.539688	-0.539688	0.801278	1.4008	-0.539688	-0.539688	0.916025	-0.539688	-0.539688	-0.539688	-0.539688	-0.539688	-0.539688	-0.539688	-0.539688	-0.539688	0.00311754	-0.539688	0.293354	2	-0.539688	-0.539688	-0.539688	-0.539688	0.988318	-0.539688	-0.539688	-0.539688	-0.539688	-0.539688	-0.539688	0.401896	0.405233	-0.539688	1.55448	-0.539688	-0.539688	1.16745	-0.539688	-0.539688	-0.539688	-0.539688
SF3B6--chr2---	1.4741	-0.591476	-0.591476	1.31197	-0.591476	0.531123	-0.591476	-0.591476	-0.591476	-0.591476	-0.591476	-0.591476	-0.591476	0.789404	-0.591476	-0.591476	-0.591476	-0.591476	-0.591476	-0.041079	-0.591476	0.531441	-0.591476	-0.591476	-0.591476	0.198742	0.513396	-0.591476	-0.591476	-0.591476	-0.591476	0.85798	-0.591476	-0.591476	-0.591476	-0.591476	-0.591476	-0.591476	-0.591476	-0.591476	-0.591476	-0.591476	-0.591476	2	0.338468	-0.591476	-0.591476	-0.591476	1.03662
SH3BGRL3--chr1--+	-0.740609	-0.740609	-0.740609	-0.136264	-0.740609	-0.740609	-0.740609	-0.219033	-0.740609	-0.740609	-0.740609	-0.740609	-0.740609	0.497555	-0.740609	-0.740609	-0.740609	-0.740609	-0.740609	-0.442805	-0.234407	-0.133031	-0.740609	-0.740609	-0.740609	-0.740609	-0.740609	-0.740609	-0.740609	-0.740609	-0.740609	0.0436501	-0.740609	0.0522696	-0.740609	-0.48714	-0.740609	-0.740609	-0.740609	-0.740609	-0.740609	-0.740609	-0.740609	-0.740609	-0.740609	-0.740609	-0.740609	-0.740609	-0.740609
SHFM1--chr7---	-0.0677911	-0.752157	1.64743	0.119874	-0.752157	0.12429	-0.752157	0.000442716	0.485856	0.240956	-0.752157	-0.752157	-0.752157	1.03443	-0.752157	1.36495	2	-0.752157	0.176499	0.840376	-0.0217405	0.740875	-0.752157	-0.350158	-0.752157	1.33859	0.11045	-0.752157	1.52557	-0.752157	0.506159	2	-0.752157	1.12793	0.194377	0.195913	1.82538	-0.752157	0.467566	-0.752157	-0.752157	0.798775	-0.20857	-0.752157	-0.752157	1.49569	-0.752157	0.572393	0.518948
SIVA1--chr14--+	0.699015	-0.651244	2	-0.651244	0.128065	1.02906	0.398661	-0.651244	0.742399	-0.651244	0.966528	-0.651244	-0.651244	-0.651244	-0.651244	-0.651244	-0.651244	-0.651244	0.394152	1.14148	-0.651244	1.565	-0.651244	1.05077	-0.651244	0.0432594	1.0058	-0.651244	1.91281	-0.651244	0.765255	2	-0.651244	-0.651244	-0.651244	0.110925	-0.651244	-0.651244	-0.651244	-0.651244	-0.651244	1.09465	0.848635	-0.651244	-0.651244	-0.651244	-0.651244	0.210121	-0.651244
SKP1--chr5---	0.865177	-0.786163	-0.786163	0.735555	-0.0772761	-0.786163	0.168867	-0.786163	-0.786163	0.23077	0.685419	-0.786163	-0.786163	1.58456	-0.786163	-0.786163	-0.786163	-0.786163	-0.786163	0.0188507	0.515397	-0.290719	-0.786163	-0.0292498	-0.786163	0.730113	-0.786163	0.210472	-0.786163	2	-0.0466718	1.67497	-0.786163	-0.786163	-0.786163	-0.0928672	-0.786163	0.112116	-0.786163	-0.786163	-0.0726908	1.70481	-0.229539	-0.786163	0.50846	-0.786163	-0.786163	-0.786163	0.515429
SLC22A1--chr6--+	0.965604	0.942111	-0.669076	2	1.63449	0.843965	1.42662	0.0937992	-0.669076	0.337597	0.787659	-0.669076	-0.669076	1.67773	-0.669076	-0.669076	2	-0.669076	0.922382	0.436538	1.05465	1.71934	2	1.07141	2	1.16347	1.69104	-0.669076	-0.669076	-0.669076	1.7051	2	0.681501	2	1.85696	1.13234	-0.669076	1.32754	1.91138	0.571205	-0.669076	0.903031	2	-0.669076	1.04625	-0.669076	-0.669076	1.12072	1.41582
SLC25A3--chr12--+	0.370081	0.124783	-0.77218	-0.77218	-0.112918	0.0624619	0.72857	0.470819	0.406782	-0.77218	-0.77218	-0.77218	-0.77218	1.43258	-0.77218	-0.77218	-0.77218	2	-0.77218	0.266516	0.438266	-0.311419	1.23735	0.208293	0.0806233	0.268713	-0.77218	-0.77218	-0.77218	1.90306	-0.0844556	1.00154	-0.77218	-0.77218	0.129206	0.750128	-0.77218	-0.77218	0.389365	-0.77218	0.388516	-0.77218	0.496653	-0.77218	0.431815	-0.77218	-0.77218	-0.0435018	-0.77218
SLC25A5--chrX--+	0.524668	0.255464	-0.728913	0.182454	-0.728913	-0.728913	0.245819	-0.728913	0.564946	-0.728913	0.773027	-0.728913	-0.728913	0.397813	-0.728913	-0.728913	-0.728913	-0.728913	0.241633	0.0927081	0.0344521	0.187329	-0.728913	-0.30878	0.207001	-0.728913	0.172605	0.980301	-0.728913	-0.728913	1.032	0.453769	-0.728913	-0.728913	-0.728913	0.261924	1.96489	0.832315	-0.728913	0.00245868	-0.000721745	1.81344	-0.728913	-0.728913	-0.728913	-0.728913	-0.728913	0.070779	-0.728913
SLC25A6--chrX---	-0.181699	0.0395863	-0.769764	-0.0204418	-0.769764	-0.0166474	0.0316565	-0.769764	-0.769764	0.0836026	1.19097	-0.769764	-0.769764	-0.769764	-0.769764	-0.769764	-0.769764	1.94662	-0.769764	-0.0942308	-0.769764	-0.354009	-0.769764	0.114939	-0.769764	-0.239631	-0.769764	-0.769764	1.18745	-0.769764	-0.149214	-0.769764	-0.769764	-0.769764	0.0435777	0.0448976	-0.769764	-0.769764	-0.170557	-0.168434	-0.769764	0.562927	-0.302669	-0.769764	-0.145893	-0.769764	-0.769764	-0.769764	-0.769764
SLC27A5--chr19---	1.10871	1.62867	-0.671986	1.91959	1.83734	0.976208	0.357856	-0.671986	-0.671986	0.424608	0.914871	2	-0.671986	-0.671986	-0.671986	-0.671986	-0.671986	-0.671986	1.06163	1.32063	1.20571	0.976617	2	1.22396	1.00753	0.534933	-0.671986	0.402721	-0.671986	-0.671986	1.5797	-0.671986	-0.671986	-0.671986	1.09065	0.639833	-0.671986	0.296659	0.0980071	1.14145	2	-0.671986	0.799232	2	1.19657	-0.671986	-0.671986	1.6799	0.731566
SLC2A3--chr12---	-0.500074	-0.500074	-0.500074	-0.500074	-0.500074	-0.500074	-0.500074	-0.500074	-0.500074	-0.500074	-0.500074	-0.500074	-0.500074	-0.500074	-0.500074	-0.500074	-0.500074	-0.500074	-0.500074	-0.500074	-0.500074	-0.500074	-0.500074	-0.500074	-0.500074	-0.500074	-0.500074	-0.500074	-0.500074	-0.500074	-0.500074	0.513783	-0.500074	-0.500074	-0.500074	-0.500074	-0.500074	-0.500074	-0.500074	-0.500074	-0.500074	-0.500074	-0.500074	-0.500074	0.150398	-0.500074	-0.500074	-0.500074	-0.500074
SLPI--chr20---	0.315565	-0.492926	2	1.26268	-0.492926	-0.492926	-0.492926	-0.492926	-0.492926	-0.492926	-0.492926	-0.492926	-0.492926	-0.492926	-0.492926	2	-0.492926	-0.492926	-0.492926	0.435819	-0.492926	-0.492926	1.99998	1.29325	-0.492926	0.798346	-0.492926	0.656893	-0.492926	-0.492926	0.360226	2	-0.492926	-0.492926	-0.492926	1.60655	2	-0.492926	1.85308	1.44725	0.946967	1.3393	0.65875	2	-0.492926	-0.492926	-0.492926	1.07186	-0.492926
SMDT1--chr22--+	-0.68423	0.957929	-0.68423	1.34117	0.567775	0.857897	-0.68423	-0.68423	-0.68423	-0.68423	1.67321	-0.68423	-0.68423	1.16157	-0.68423	-0.68423	-0.68423	-0.68423	0.937821	-0.68423	-0.68423	-0.184357	-0.68423	0.07945	-0.68423	-0.0468379	-0.68423	-0.68423	-0.68423	-0.68423	1.05651	2	-0.68423	0.497755	-0.68423	0.295258	-0.68423	-0.68423	0.0362114	0.0387646	-0.68423	2	1.94605	2	0.0658653	-0.68423	-0.68423	-0.68423	-0.68423
SNRPB--chr20---	0.319826	0.638774	2	0.552253	-0.527777	-0.527777	-0.527777	-0.527777	-0.527777	-0.527777	1.25212	2	-0.527777	-0.527777	-0.527777	-0.527777	-0.527777	-0.527777	-0.527777	-0.527777	-0.527777	0.0714686	-0.527777	-0.0298918	-0.527777	0.236326	-0.527777	-0.527777	-0.527777	2	-0.527777	0.873778	-0.527777	-0.527777	1.44928	-0.527777	2	-0.527777	0.982878	-0.527777	-0.527777	-0.527777	-0.527777	-0.527777	-0.527777	-0.527777	-0.527777	-0.527777	-0.527777
SNRPD2--chr19---	-0.605115	0.344867	-0.605115	-0.605115	-0.605115	-0.605115	0.984345	-0.605115	-0.605115	-0.605115	-0.605115	-0.605115	-0.605115	-0.605115	-0.605115	-0.605115	-0.605115	-0.605115	0.33152	0.187798	-0.605115	-0.117119	-0.605115	0.140421	0.298098	0.0171334	0.264904	-0.605115	-0.605115	-0.605115	-0.605115	2	-0.605115	-0.605115	1.0049	-0.236233	-0.605115	-0.605115	-0.605115	-0.605115	0.0976328	-0.605115	-0.605115	-0.605115	-0.605115	-0.605115	-0.605115	-0.605115	-0.605115
SNRPD3--chr22--+	1.08742	-0.526086	-0.526086	-0.526086	0.40516	1.48181	-0.526086	-0.526086	-0.526086	-0.526086	-0.526086	-0.526086	-0.526086	-0.526086	-0.526086	-0.526086	-0.526086	-0.526086	-0.526086	0.53144	-0.526086	0.124766	-0.526086	0.0146762	-0.526086	-0.526086	-0.526086	-0.526086	2	-0.526086	-0.526086	0.996168	-0.526086	-0.526086	-0.526086	-0.526086	-0.526086	-0.526086	0.411953	-0.526086	0.411184	-0.526086	0.205137	-0.526086	-0.526086	-0.526086	-0.526086	0.503214	-0.526086
SNRPE--chr1--+	-0.493309	-0.493309	2	-0.493309	0.41589	-0.493309	-0.493309	-0.493309	-0.493309	-0.493309	-0.493309	-0.493309	-0.493309	-0.493309	-0.493309	-0.493309	-0.493309	-0.493309	0.726326	0.939172	-0.493309	-0.493309	-0.493309	-0.493309	0.682805	-0.493309	0.639582	-0.493309	-0.493309	-0.493309	-0.493309	0.992905	-0.493309	-0.493309	0.749806	-0.493309	-0.493309	-0.493309	0.422522	-0.493309	-0.493309	-0.493309	-0.493309	-0.493309	-0.493309	-0.493309	-0.493309	0.511622	-0.493309
SNRPF--chr12--+	-0.476535	-0.476535	2	-0.476535	0.450161	0.696685	0.771934	-0.476535	-0.476535	0.852856	-0.476535	-0.476535	-0.476535	-0.476535	-0.476535	-0.476535	-0.476535	-0.476535	1.62511	0.0986806	-0.476535	-0.476535	-0.476535	-0.476535	-0.476535	1.50563	0.678159	-0.476535	-0.476535	-0.476535	-0.476535	1.03828	-0.476535	-0.476535	0.790505	0.42978	2	-0.476535	-0.476535	0.460229	-0.476535	-0.476535	0.251115	-0.476535	-0.476535	-0.476535	-0.476535	0.547736	-0.476535
SNRPG--chr2---	1.82738	-0.500877	-0.500877	0.536225	0.322452	-0.500877	-0.500877	-0.500877	-0.500877	0.680228	-0.500877	-0.500877	-0.500877	-0.500877	-0.500877	-0.500877	-0.500877	-0.500877	-0.500877	1.11253	0.367804	-0.500877	2	0.378231	-0.500877	0.799056	0.525017	-0.500877	-0.500877	-0.500877	-0.500877	1.71425	-0.500877	-0.500877	0.624831	-0.065905	-0.500877	-0.500877	-0.500877	-0.500877	-0.500877	-0.500877	0.145608	-0.500877	-0.500877	-0.500877	2	1.0744	-0.500877
SNU13--chr22---	1.73007	-0.551241	-0.551241	-0.551241	-0.551241	-0.551241	-0.551241	0.325775	-0.551241	-0.551241	-0.551241	-0.551241	-0.551241	1.5307	-0.551241	-0.551241	-0.551241	-0.551241	-0.551241	-0.0504916	0.299925	0.0125842	-0.551241	-0.0827849	-0.551241	-0.551241	1.1641	-0.551241	2	-0.551241	-0.551241	1.61922	-0.551241	1.63965	0.55177	-0.551241	2	-0.551241	-0.551241	-0.551241	-0.551241	-0.551241	-0.551241	-0.551241	-0.551241	-0.551241	-0.551241	-0.551241	-0.551241
SNX6--chr14---	-0.474955	-0.474955	-0.474955	-0.474955	-0.474955	-0.474955	-0.474955	-0.474955	-0.474955	-0.474955	-0.474955	-0.474955	-0.474955	-0.474955	-0.474955	-0.474955	-0.474955	-0.474955	-0.474955	-0.474955	-0.474955	-0.474955	-0.474955	0.0664306	0.731068	0.997062	-0.474955	-0.474955	-0.474955	-0.474955	-0.474955	-0.474955	-0.474955	-0.474955	-0.474955	-0.474955	-0.474955	-0.474955	-0.474955	0.467494	-0.474955	-0.474955	-0.474955	-0.474955	-0.474955	-0.474955	-0.474955	-0.474955	-0.474955
SOD1--chr21--+	0.374957	-1.36466	1.54433	1.49798	1.05651	0.687846	-0.719115	0.304682	0.0273841	0.421296	0.214716	-1.36466	-1.36466	0.529772	-1.36466	0.100704	-1.36466	2	0.567466	0.862383	0.26965	0.939752	1.64279	0.847757	0.71693	0.54846	0.666537	-0.232681	0.949622	1.89566	1.21963	1.68102	-0.442443	-0.0633471	0.969287	0.444031	1.19586	-0.330689	0.00984404	-0.227928	0.701846	-0.291175	0.264008	-1.36466	0.75563	0.191198	0.953892	-0.447866	-0.484858
SOD2--chr6---	0.46727	0.221747	1.61119	0.74045	0.479062	0.746728	1.6739	-0.676034	-0.676034	0.910316	0.693781	2	-0.676034	0.351574	-0.676034	-0.676034	-0.676034	-0.676034	-0.676034	-0.266446	-0.676034	-0.214853	-0.676034	1.13865	0.177547	-0.0879778	-0.676034	0.251679	-0.676034	-0.676034	0.0123179	1.6149	-0.676034	0.414462	-0.676034	0.456361	-0.676034	0.747853	1.2168	0.889366	0.485721	-0.676034	-0.157903	1.83951	-0.676034	-0.676034	2	1.00697	-0.676034
SON--chr21--+	-0.677396	0.267476	-0.677396	0.197397	0.0170794	-0.677396	-0.677396	0.0775873	-0.677396	-0.677396	-0.677396	-0.677396	-0.677396	-0.677396	-0.677396	-0.677396	-0.677396	-0.677396	-0.677396	-0.677396	0.0553338	-0.677396	-0.677396	-0.677396	-0.677396	-0.677396	0.187943	-0.677396	-0.677396	-0.677396	0.0470616	-0.677396	-0.677396	-0.677396	-0.677396	-0.677396	1.9083	-0.677396	0.0221451	0.0246243	0.0215715	-0.677396	0.300555	-0.677396	0.590908	-0.677396	-0.677396	-0.677396	0.597735
SPARCL1--chr4---	-0.42375	-0.42375	-0.42375	-0.42375	-0.42375	-0.42375	-0.42375	-0.42375	-0.42375	-0.42375	-0.42375	-0.42375	-0.42375	-0.42375	-0.42375	-0.42375	-0.42375	-0.42375	-0.42375	-0.00989907	-0.42375	-0.42375	-0.42375	-0.42375	-0.42375	-0.42375	-0.42375	-0.42375	-0.42375	-0.42375	-0.42375	-0.42375	-0.42375	-0.42375	-0.42375	-0.42375	-0.42375	-0.42375	-0.42375	-0.42375	-0.42375	-0.42375	-0.42375	-0.42375	-0.42375	-0.42375	-0.42375	-0.42375	-0.42375
SPCS1--chr3--+	1.19258	0.414502	-0.678065	0.333468	0.124966	0.338591	1.14996	0.194932	-0.678065	-0.678065	-0.678065	-0.678065	-0.678065	-0.678065	-0.678065	-0.678065	-0.678065	2	1.71202	0.233858	0.1692	0.338879	-0.678065	0.516223	1.08629	0.0375782	-0.678065	0.450928	-0.678065	-0.678065	-0.678065	-0.678065	-0.678065	0.649029	0.41989	0.421672	-0.678065	-0.678065	0.130823	0.13369	-0.678065	2	-0.0475183	2	-0.678065	-0.678065	-0.678065	-0.678065	-0.678065
[truncated: 126 more rows]
[truncated: 398 more columns]
