# Supplementary material for: Long-read single-cell sequencing reveals expressions of hypermutation clusters of isoforms in human liver cancer cells
Source: eLife. 2024 Jan 11;12:RP87607. doi: 10.7554/eLife.87607 (PMC10945587; doi:10.7554/eLife.87607)
Supplement: Supplementary file 6. [file elife-87607-supp6.xlsx]

## Sheet: in
Supplemental table 6: Genes with SD>=1.0
Cell	N_AAAGGATGTGTACAGG	N_AACCTTTCAGAAGCGT	N_AACGTCACAGAGACTG	N_AAGACTCAGGGAGAAT	N_AAGCGTTAGGTGCGAT	N_AATGGAAGTATAGGGC	N_AATGGCTTCCCGAACG	N_ACACTGAGTATTCCGA	N_ACACTGATCACTGGTA	N_ACCTACCAGCTGACTT	N_ACCTGTCCAAAGAGTT	N_ACGGAAGAGCAAACAT	N_ACGTACACATCAGCAT	N_ACGTACATCGCAACAT	N_ACGTAGTAGGCCCAAA	N_AGAAATGAGGGCGAGA	N_AGAACAATCGCGCTGA	N_AGACAAAGTATTGCCA	N_AGCGTCGCAGTTGGTT	N_AGGAGGTGTTAGCTAC	N_AGGCATTAGTAAGCAT	N_AGGGTCCCACGGCGTT	N_AGTCAACTCCTCTGCA	N_ATACCTTTCCGGGACT	N_ATAGAGATCAGTCAGT	N_ATCTTCAGTTCCCACT	N_ATGCCTCGTGTGTCGC	N_ATGCCTCTCATGCCAA	N_ATTCAGGTCGCTGTTC	N_CAACAGTCACCCTAAA	N_CAACAGTCACCTCGTT	N_CAACAGTTCGATGCTA	N_CAACGATTCCGGACGT	N_CAAGAGGCAATAGTCC	N_CAATTTCGTGGACTGA	N_CAATTTCTCATCCCGT	N_CACGAATTCATCGCTC	N_CACTGTCCAGTCTTCC	N_CAGATACCAAGTAGTA	N_CAGATACGTTAGCTAC	N_CAGATACTCGGCTGAC	N_CAGATTGGTGAAGCGT	N_CAGGTATAGAGAGCAA	N_CATAAGCCACTTACAG	N_CATCCACAGATCACCT	N_CATGAGTCATTGGATC	N_CATTCATAGAACTCCT	N_CATTCATTCCGATGCG	N_CATTCCGTCGAACACT
Group	Normal	Normal	Normal	Normal	Normal	Normal	Normal	Normal	Normal	Normal	Normal	Normal	Normal	Normal	Normal	Normal	Normal	Normal	Normal	Normal	Normal	Normal	Normal	Normal	Normal	Normal	Normal	Normal	Normal	Normal	Normal	Normal	Normal	Normal	Normal	Normal	Normal	Normal	Normal	Normal	Normal	Normal	Normal	Normal	Normal	Normal	Normal	Normal	Normal
Cluster	A	A	A	A	A	A	A	A	A	A	A	A	A	A	A	A	A	A	A	A	A	A	A	A	A	A	A	A	A	A	A	A	A	A	A	A	A	A	A	A	A	A	A	A	A	A	A	A	A
A2M--chr12---	1.37281	0.447469	2	0.346323	0.804336	1.7362	0.710661	0.424694	-0.917056	0.666442	1.91616	1.6972	0.820116	0.046059	-1.71249	-0.352233	-1.71249	0.31862	0.824025	0.596057	1.35557	1.13317	1.07924	1.04831	0.881925	1.11953	0.721219	-0.338866	-0.249033	1.66543	0.249191	1.83108	0.036754	1.24497	0.454048	0.853396	-0.0564016	0.497082	0.0724124	0.897971	0.205791	0.554654	1.10611	0.710619	1.34697	0.412668	-0.245738	0.0289635	0.263125
ACTB--chr7---	-0.571768	-1.4619	-1.4619	-0.641639	-1.4619	-0.978131	0.242537	0.149019	-0.77856	-0.543273	-0.202417	-1.4619	-1.4619	-1.4619	-1.4619	0.276126	-1.4619	-1.4619	-0.324596	-0.582879	-0.52328	-0.499079	0.271452	-0.514156	-1.4619	-0.307882	-0.64941	-0.559195	-1.4619	-1.4619	-0.767353	-0.135262	-1.4619	-0.830412	-0.307395	-0.480978	0.580003	-0.637352	-0.788656	-0.0533785	-0.558622	-0.605841	-0.72647	-1.4619	-1.06115	-0.221171	-1.4619	-0.730795	-0.760295
ACTG1--chr17---	-0.330075	-1.40635	-1.40635	0.160028	-0.944326	-0.821417	-0.0265429	-0.535233	-1.40635	-1.40635	0.116516	-1.40635	-1.40635	-0.213997	0.702131	-1.40635	-1.40635	-1.40635	-0.358532	-0.201991	-0.918876	-0.600522	0.00196377	0.182891	-0.808689	-0.199801	-1.40635	-0.314872	-1.40635	-1.40635	-0.566561	0.197715	-1.40635	-0.642806	-0.340992	-0.339489	-1.40635	-1.40635	-0.940956	-0.589747	-0.314179	0.21716	-0.517128	-1.40635	-0.0399049	0.0938401	-1.40635	0.015156	-1.40635
AGXT--chr2--+	1.44948	1.47984	2	1.76706	0.648932	0.925052	0.883794	0.506625	0.564762	0.679333	0.136514	0.466246	1.10142	0.605142	-1.1899	1.78357	-1.1899	2	1.73601	1.04006	0.906379	0.369816	2	1.57498	1.68645	0.797109	1.01194	0.485536	0.753711	1.11685	1.4042	2	-0.415388	0.855156	1.12943	0.904095	1.69619	0.67972	1.01991	1.58147	1.35898	1.27749	1.21871	1.42736	0.702515	-1.1899	0.137112	1.0505	1.41867
AHSG--chr3--+	1.7128	1.44883	1.19304	1.62269	0.917433	0.862146	1.18715	0.676411	0.389241	0.266645	1.67252	1.71161	0.74589	0.364659	0.757851	0.979401	-1.64347	1.7261	1.33694	1.48703	0.500215	0.678218	1.32746	1.76236	0.577228	1.50719	0.532229	0.924282	1.60347	0.947047	1.30745	1.82917	-0.466224	1.71586	1.26075	1.24507	0.790762	-0.167208	1.33454	0.9785	1.5233	0.510733	0.997606	1.8763	0.817195	0.560878	1.46328	0.761072	0.422826
ALDOB--chr9---	1.14787	0.886589	1.589	1.77956	1.407	1.00108	1.92236	1.47455	0.331946	1.47019	2	-1.42125	0.0219774	0.470168	0.215247	1.38223	-1.42125	-1.42125	1.23957	0.565874	1.67191	1.74124	0.82946	1.50072	1.62025	1.24126	1.24894	0.925753	0.674993	0.634305	1.21033	1.92348	-0.0109989	2	1.09348	1.45653	1.85128	0.464382	1.53462	1.38785	1.34983	0.607753	1.87652	-0.0541921	0.841861	-0.256879	1.16847	1.05856	1.09772
AMBP--chr9---	1.41583	1.03313	1.76088	0.519474	1.3676	0.569568	0.654371	1.09656	0.584984	0.82449	0.669784	2	0.804233	0.671373	-0.132182	1.80793	0.402918	1.95898	1.43235	1.41975	0.717789	0.611718	2	1.06093	1.31296	0.716014	0.778844	0.112496	1.52518	2	0.946873	1.88611	-0.120584	0.756656	0.0755006	1.2705	1.43436	0.435871	0.948344	0.500982	1.39253	0.629201	0.671998	1.88403	0.679346	-0.0381568	1.20001	0.430619	0.687307
ANG--chr14--+	1.71657	-0.95441	2	1.32462	0.557021	0.612367	0.0937107	0.44468	1.50383	0.490098	-0.95441	-0.95441	1.66719	0.233825	1.14679	1.13982	-0.95441	2	1.26194	2	1.09059	0.830128	2	0.531317	1.3613	1.65017	0.594126	0.133298	1.26936	2	1.32079	2	-0.0682594	-0.193504	0.107268	1.44142	2	0.355622	1.74281	1.16329	1.15771	0.663493	1.15891	0.800841	0.942217	-0.95441	1.27346	0.848235	-0.109016
APOA1--chr11---	1.45889	0.930692	2	0.272677	0.552234	1.12423	0.74909	1.07883	1.18041	0.314308	1.30675	2	0.116449	0.548216	0.508085	2	0.360538	1.92885	1.34194	1.64944	1.28988	1.08033	2	1.55096	1.45859	1.1053	1.21603	0.111307	1.57081	2	0.407736	2	0.296885	0.533516	0.550584	2	1.98193	0.897029	0.897974	0.982181	0.97796	0.576571	0.548657	1.90921	1.28388	0.578488	1.35071	0.645709	0.970671
APOA1-AS--chr11--+	1.53013	1.32915	2	0.568905	0.821166	2	0.257026	1.36424	2	1.20518	0.676485	-0.807283	0.627012	0.112433	-0.807283	2	-0.807283	1.83349	1.66891	1.3813	0.965442	1.20486	1.82087	1.87391	1.18415	1.15011	0.558605	0.0346239	0.365263	2	0.764448	2	1.6649	0.662513	1.2467	1.99291	2	1.47342	2	1.28426	1.87817	0.763548	0.503322	1.78907	1.04285	-0.807283	0.917133	0.587998	2
APOA2--chr1---	0.806151	0.0877229	2	2	0.54286	0.407827	1.37634	0.602188	0.365496	0.572041	2	1.37846	-0.127628	0.434452	-0.173567	1.85448	-2	1.94373	0.970404	1.15419	0.910722	1.07512	2	1.13117	0.96947	1.60845	0.872489	-0.215262	1.77657	2	0.898282	2	-1.5307	1.94141	0.792686	0.932201	2	-0.143246	0.743121	0.783587	0.327777	0.684057	0.818032	1.29572	0.609325	-0.253576	1.54366	0.554867	0.27652
APOB--chr2---	1.26205	0.437606	0.510645	1.24865	0.75556	1.3171	1.40038	1.05912	1.35333	1.65672	1.13386	-1.48683	0.483875	0.280895	0.321705	1.44139	-1.48683	0.322806	1.33234	1.11434	1.29692	1.6334	1.23771	1.57646	0.914457	1.91935	0.0320484	0.330249	-0.18295	-1.48683	1.65881	1.13305	0.546034	1.32792	0.985836	1.55664	0.63086	1.67967	1.74822	1.61758	0.900284	-0.0942764	0.782385	0.0239411	2	-1.48683	-0.180014	1.30639	1.39151
APOC1--chr19--+	0.794455	0.167817	2	1.97457	0.807338	0.59533	1.64909	0.855097	-0.0653664	0.419393	1.92271	1.13603	0.266525	0.584544	-0.919565	1.53521	-2	1.32547	0.802361	0.951829	0.968856	1.89726	1.76112	1.28752	1.21957	1.25756	0.856839	0.395756	1.39138	2	1.36606	2	-0.733817	1.68401	0.734031	1.01739	1.45841	-0.0943693	1.0326	0.920345	1.15744	0.646337	1.49088	0.828887	0.430417	0.0953775	1.04364	1.41452	0.338643
APOC1P1--chr19--+	1.09525	-0.258533	1.93747	1.78725	0.437123	1.55734	2	0.523816	0.841107	0.569804	2	1.81036	-0.892831	-0.892831	-0.892831	2	-0.892831	-0.892831	0.987028	0.876881	0.876251	2	-0.892831	1.12341	-0.892831	0.832963	0.675137	0.546903	-0.892831	1.77954	2	2	0.00443987	1.95812	-0.255405	1.75591	1.59843	0.11317	0.444491	-0.068837	0.976976	0.151616	2	0.884446	-0.0414117	-0.892831	0.644514	-0.00083672	-0.0368284
APOC2--chr19--+	0.812448	0.24426	2	1.84682	0.825465	0.595687	1.77687	0.301973	0.955116	0.10492	1.78126	1.82996	-0.0261037	0.568569	-1.76107	1.72832	0.264062	1.92227	1.40161	1.28322	0.332395	1.02591	1.85068	1.34827	1.09009	1.35758	0.740552	-0.161353	1.77825	2	0.487965	2	-1.08959	1.47203	0.79839	1.31303	1.28916	0.166065	0.593746	0.683893	0.832779	0.378113	1.11492	1.33039	0.805352	-0.0941354	1.62526	0.826156	0.922039
APOC3--chr11--+	1.05704	0.476934	2	1.99836	1.0571	0.824114	1.32046	1.09275	0.655351	1.07785	1.85001	1.44654	0.061623	0.394074	0.242829	2	-0.208718	1.83884	1.56801	1.17625	1.25294	1.02288	1.74384	1.31066	1.32435	1.49904	0.808253	0.443074	0.887779	2	1.33976	2	-0.0586999	1.75407	1.01137	1.59821	1.44099	0.269995	1.25342	1.11107	1.02922	0.273093	1.15415	1.67124	0.516445	-0.498054	1.5635	1.09718	0.64609
APOH--chr17---	1.29788	0.784897	1.5329	0.853194	0.68913	1.01561	0.705371	1.13751	1.05465	0.201058	0.743468	1.40744	-0.588643	0.420019	0.36301	0.355906	1.4103	1.15841	0.886282	1.28807	1.05849	0.439746	2	1.11236	1.68415	1.15516	0.837865	0.173734	1.67035	2	0.593965	2	-0.977431	1.19551	0.854287	1.6123	2	0.550944	1.03162	0.921702	0.955168	0.744841	0.587149	1.97352	1.1587	-0.274629	1.56001	0.917753	1.23468
AZGP1--chr7---	1.47259	1.12179	1.206	0.667425	1.31021	1.53693	1.10831	0.829266	0.895273	0.336513	-0.148444	2	0.741922	0.082205	-1.09692	0.300339	-1.09692	2	1.25147	1.27442	0.9324	0.570253	0.975661	1.49219	1.33449	1.24883	-0.125422	0.581382	0.406346	2	1.91447	2	-1.09692	-1.09692	-0.0433813	1.41567	0.604217	1.02579	1.31996	0.740763	0.873541	0.508579	-0.0160378	1.87465	1.16786	0.386627	0.409731	-0.222734	0.260546
B2M--chr15--+	-0.541497	-0.798322	0.143292	-0.872841	-1.49441	-1.67806	-0.808032	-0.69028	-1.05673	-1.24667	-0.579756	-0.597948	-1.15847	0.373131	-2	-0.0568908	-2	0.956031	-1.64947	-0.719044	-0.865083	-0.397549	-0.0619004	-0.707933	-0.511248	-0.644522	-1.68563	-0.765568	-0.910785	-0.619753	-0.601884	-0.24482	-2	-0.398827	-1.01268	-0.727133	-0.132372	-1.07943	-0.764052	-0.760693	-1.49058	0.457936	-0.578047	-2	-1.03687	-2	-0.323792	-0.9917	-0.719529
C3--chr19---	1.49863	1.13521	1.18597	1.47101	1.24853	1.34941	0.170407	1.49625	1.16157	0.861777	0.985181	-0.104834	0.731369	-0.167487	0.0686242	0.96877	0.548937	1.17038	1.47147	1.51965	1.49005	0.884051	0.731604	1.03609	0.465126	1.1761	0.514148	0.347889	1.45668	0.520954	1.05397	1.03641	1.08817	0.669223	0.876466	1.18281	0.370581	0.225	1.55207	1.55664	1.46087	0.492294	0.987279	0.819625	1.79168	0.151542	1.60731	0.610892	0.81126
CALD1--chr7--+	0.881601	-0.259694	-0.856134	1.01546	0.174708	1.02166	0.916736	0.991987	-0.0721769	-0.227257	0.588803	-0.856134	-0.856134	-0.856134	-0.856134	1.13781	-0.856134	-0.856134	0.700151	0.408528	-0.0512418	0.248457	-0.856134	1.28485	-0.289058	0.766657	0.0759905	0.49767	-0.856134	-0.856134	0.210813	1.16356	0.86787	0.334409	0.468366	0.0325041	1.48643	0.0898237	-0.856134	1.16016	0.400587	-0.856134	-0.238813	-0.856134	1.08367	-0.856134	-0.856134	0.492629	0.446315
CALM1--chr14--+	-0.611725	-1.05381	0.496258	0.212574	-0.606611	-0.487647	-0.451334	0.831474	-1.05381	-1.05381	-1.05381	-1.05381	-1.05381	0.100278	-1.05381	-1.05381	-1.05381	-1.05381	0.277195	-0.0250768	0.0446723	-0.487487	0.97476	0.176018	-0.0712669	0.457744	-1.05381	-0.425088	0.417535	-1.05381	-0.587305	1.0065	-1.05381	0.790532	-0.442373	-0.616447	0.611204	-0.0888279	-0.603349	-0.601753	-0.603719	-1.05381	-0.193124	-1.05381	0.464943	-1.05381	0.420849	-1.05381	-0.232709
CCL5--chr17---	-0.43432	-0.43432	-0.43432	-0.43432	-0.43432	-0.43432	-0.43432	-0.43432	-0.43432	-0.43432	-0.43432	-0.43432	-0.43432	-0.43432	-0.43432	-0.43432	-0.43432	-0.43432	-0.43432	-0.43432	-0.43432	-0.43432	-0.43432	-0.43432	-0.43432	-0.43432	-0.43432	-0.43432	-0.43432	-0.43432	-0.43432	-0.43432	-0.43432	-0.43432	-0.43432	-0.43432	-0.43432	-0.43432	-0.43432	-0.43432	-0.43432	-0.43432	-0.43432	-0.43432	-0.43432	-0.43432	-0.43432	-0.43432	-0.43432
CD63--chr12---	-1.20938	0.0383676	0.880235	-0.319436	-1.20938	-1.20938	-0.650851	-1.20938	-0.00497796	-1.20938	0.157102	-1.20938	-0.116243	0.639887	-1.20938	-1.20938	1.19703	-1.20938	-0.269164	-0.39697	-0.191021	-0.31527	0.054313	0.128397	-1.20938	-1.20938	-0.327866	-0.626519	0.792945	-1.20938	-0.200365	0.487235	-1.20938	-1.20938	-0.253425	-0.145125	-1.20938	-1.20938	-0.791779	-1.20938	-0.229365	0.903729	-0.411473	-1.20938	-1.20938	-1.20938	0.157718	-1.20938	0.0223512
CD74--chr5---	-0.383086	-0.74568	-0.74568	-0.283657	-0.74568	-0.74568	-0.251533	-0.74568	-0.74568	-0.74568	0.0157383	-0.74568	-0.74568	0.200899	-0.74568	-0.74568	-0.74568	-0.74568	-0.74568	-0.329154	-0.74568	-0.281185	-0.74568	-0.354042	-0.74568	-0.74568	-0.74568	-0.74568	-0.74568	-0.74568	-0.363056	-0.74568	-0.74568	-0.74568	-0.74568	-0.74568	-0.74568	-0.74568	-0.376216	-0.74568	-0.74568	0.543185	-0.74568	-0.74568	-0.74568	-0.74568	-0.74568	-0.74568	-0.74568
CFB--chr6--+	1.82093	1.9367	1.54738	1.1771	0.874724	1.08732	0.143292	0.785988	0.712167	1.15335	-1.38248	1.90181	0.34183	0.714642	-1.38248	0.566251	-1.38248	2	1.35481	1.73001	0.74869	1.03651	1.96077	1.74597	-0.828264	1.34539	0.25959	0.581976	0.686796	1.53268	0.625836	1.55055	0.584019	1.23753	1.19278	1.74084	1.69022	1.35939	1.4529	1.39876	1.66379	1.24444	0.815264	0.250825	0.841753	-1.38248	1.71162	1.00277	1.82408
CLU--chr8---	1.78551	0.43576	1.09589	0.560532	0.882011	1.31409	0.163077	0.98893	1.40945	0.499505	1.64839	-1.19327	1.39268	1.35543	-1.19327	0.872482	-1.19327	-1.19327	1.39667	0.848428	0.355771	0.990909	0.866926	0.838916	0.944115	0.953835	0.894638	0.209288	0.301013	1.4101	0.935645	1.09893	-1.19327	0.396842	1.73702	1.70802	2	-0.213245	0.766424	0.770771	1.00447	-1.19327	0.350423	1.28088	0.677568	-1.19327	1.46597	0.882777	0.156085
CP--chr3---	2	1.5662	-1.01236	1.06416	1.35118	1.21501	0.585295	1.46273	0.656189	0.395117	1.40462	-1.01236	-1.01236	0.988774	-1.01236	0.359599	-1.01236	1.03622	1.54597	2	0.842843	1.46479	1.02269	2	0.538557	1.52545	0.247148	0.855437	0.463685	1.55923	2	1.71441	0.374833	0.206005	1.17281	2	-1.01236	1.34665	1.36075	0.792047	1.68995	-1.01236	1.2129	-1.01236	1.74705	-1.01236	-1.01236	0.131867	0.980248
CYB5A--chr18---	0.969873	-0.410055	2	1.68318	0.984867	0.283994	0.702195	0.692656	-0.633205	-0.040271	1.15348	0.389651	-0.260287	0.899072	-1.41922	1.3455	-1.41922	0.587838	0.96932	1.28	0.966186	1.2141	2	1.15541	1.03686	0.751026	0.443957	0.758779	0.0269072	2	1.12407	2	-0.573288	0.393513	0.37632	1.18975	1.39099	0.285056	0.905796	0.602366	0.707699	0.518121	1.09756	0.975195	0.391328	-1.41922	2	1.20238	-0.612195
DCN--chr12---	-0.729108	-0.729108	-0.729108	-0.729108	-0.729108	-0.729108	-0.729108	-0.729108	-0.729108	-0.729108	-0.729108	-0.729108	-0.729108	-0.729108	-0.729108	-0.729108	-0.729108	-0.729108	-0.729108	-0.45863	-0.729108	-0.729108	-0.729108	-0.476073	-0.165431	-0.729108	-0.729108	-0.729108	-0.729108	-0.729108	-0.729108	-0.729108	-0.729108	-0.729108	-0.729108	-0.729108	-0.729108	-0.176937	-0.290177	-0.288622	-0.729108	-0.729108	-0.729108	-0.729108	-0.729108	-0.729108	-0.729108	-0.247474	-0.729108
DDT--chr22---	1.47198	1.09488	2	2	1.16212	0.245927	1.67158	0.0892399	0.183525	0.955561	0.851664	1.44686	0.305824	0.80638	-1.30602	1.97544	-1.30602	1.22124	1.25274	0.494397	0.867533	1.33007	1.20765	1.03995	1.35811	1.38723	0.391684	1.13771	0.0116727	1.41901	1.33363	2	-1.30602	1.83628	0.330054	0.818735	0.185118	-0.166512	0.422084	0.89744	1.17012	0.960038	1.23184	-1.30602	0.343729	-0.00561169	1.34323	1.08275	0.686181
DNAJB1--chr19---	-0.714205	-0.714205	-0.714205	-0.714205	-0.714205	-0.714205	-0.164434	-0.714205	-0.714205	-0.714205	-0.714205	-0.714205	-0.714205	1.43818	-0.714205	-0.714205	-0.714205	-0.714205	-0.714205	-0.250792	-0.714205	-0.714205	-0.714205	-0.714205	-0.714205	-0.714205	-0.714205	-0.714205	-0.714205	-0.714205	-0.714205	-0.714205	-0.714205	-0.714205	-0.714205	-0.498614	-0.714205	-0.714205	-0.714205	-0.714205	-0.714205	0.71974	-0.39378	-0.714205	-0.714205	-0.714205	-0.714205	-0.714205	-0.714205
EEF1A1--chr6---	-0.129634	-1.32993	-2	0.627692	-1.30549	-0.842158	0.0589784	0.343457	-1.0615	-0.699231	-0.506988	-2	-2	-1.65546	-0.330656	-0.994072	-2	0.923696	-0.381546	-0.293574	-0.519384	0.345549	-0.342721	-0.578524	-0.818282	-1.01085	0.0694383	-0.158045	-2	-0.553487	-0.276043	-0.311445	-0.608688	0.353124	-1.01029	-0.607113	0.475815	-0.841162	0.0781636	-0.883891	0.382845	-0.399331	0.632762	-2	-0.0539583	-0.236255	-0.209416	0.202055	-0.149644
EEF1B2--chr2--+	0.122239	-0.748946	-1.37439	0.753382	-0.293422	-0.0673748	0.676103	-1.37439	-0.552311	-0.269253	0.140808	-1.37439	-0.162285	0.443062	-1.37439	-1.37439	-1.37439	-1.37439	-1.37439	-0.176095	-0.245201	0.908339	0.710889	-0.234225	-0.364381	-0.648585	-0.0837958	-0.728094	0.138086	0.491027	-0.020297	-0.137597	-1.37439	0.235081	-0.745862	-0.0850331	0.337169	-0.791876	-0.28699	0.474552	-0.565048	-0.344524	0.0470407	0.378075	-0.892279	-1.37439	-1.37439	-0.201922	-1.37439
EEF1D--chr8---	-0.0294823	-0.275189	-1.33591	0.63646	-0.0179939	-0.0223875	1.04472	0.0679144	-1.33591	-0.67317	0.587544	-1.33591	-1.33591	-0.143654	-1.33591	0.0769096	-1.33591	0.773684	-0.288178	-0.811278	0.0366438	0.236496	0.0722894	-0.190068	-1.33591	-0.347745	-0.353593	-1.33591	-1.33591	-1.33591	0.701573	0.268025	-1.33591	0.281575	-0.270639	-0.0401337	1.1328	-0.339015	-0.0106927	-0.239939	-0.243828	-0.300917	0.589626	-1.33591	-0.492197	-1.33591	-1.33591	0.29252	1.1714
EEF1G--chr11---	-0.495686	-0.671227	0.322176	0.70108	-0.84133	-0.295883	-0.239144	0.12048	-1.31311	-1.31311	0.651127	-1.31311	-1.31311	-0.0955749	0.839904	0.129666	-1.31311	-1.31311	0.361752	-0.0833153	-0.815342	-0.715655	-1.31311	0.574542	-1.31311	-0.0810792	-0.725256	1.18029	0.965497	-1.31311	-0.820962	0.617605	-1.31311	-0.0318569	-0.668061	-0.667014	-1.31311	-0.295078	-0.197126	-0.836204	-0.197873	-1.31311	0.653254	0.485424	-0.159882	-1.31311	-1.31311	-0.410448	-1.31311
EIF1--chr17--+	-0.0180461	-0.666766	-1.94458	0.280224	-1.20137	-1.02915	0.368356	-0.465456	-1.94458	-1.33552	0.711878	-0.197292	-1.94458	0.683974	-0.00703185	-0.0134621	-1.94458	0.734576	-0.680924	-0.104013	-1.16505	0.644448	-0.0186557	-0.108411	0.717479	0.0625884	-0.752611	-1.34767	-0.547685	0.944232	-0.0721231	0.361266	-1.94458	0.21302	0.123416	0.125489	-0.363815	-1.02843	-0.940277	-0.236931	0.00303786	-0.073196	0.59658	0.368316	-0.502676	-1.94458	0.109776	0.419111	-0.683168
FABP1--chr2---	1.54865	0.46141	2	2	0.603656	0.676233	1.21699	0.52276	0.115877	-0.127393	1.66185	1.49212	0.304346	1.05133	-0.532614	1.18213	0.449336	1.93114	1.46447	2	1.36205	1.04161	1.66471	1.23328	0.811693	2	0.476173	0.0216017	1.37715	2	0.805614	2	-0.992932	1.80111	1.32884	1.82425	1.67525	0.125293	0.395366	0.723711	0.833435	0.0429825	0.879689	1.16884	0.977192	-0.202234	1.05054	0.737619	0.284671
FABP4--chr8---	-0.680764	-0.680764	-0.680764	-0.680764	-0.680764	-0.138234	-0.103437	-0.680764	0.0855799	-0.680764	-0.680764	-0.680764	0.449164	-0.680764	1.27487	-0.680764	-0.680764	-0.680764	-0.680764	-0.680764	-0.680764	-0.13808	-0.680764	0.114423	0.260769	-0.680764	-0.680764	-0.680764	-0.680764	1.05818	-0.680764	-0.680764	-0.680764	-0.680764	-0.0948487	-0.261658	-0.680764	-0.680764	-0.680764	-0.680764	-0.680764	-0.680764	-0.344278	-0.680764	-0.680764	-0.680764	-0.680764	-0.680764	-0.680764
FAU--chr11---	-0.172	-1.34554	0.0136878	0.576702	-0.261516	-1.8481	0.263373	-0.0733036	-0.775013	-1.31821	-0.630604	-0.327946	-1.8481	-0.894842	-1.8481	-0.168012	-1.8481	0.88898	-0.0700354	-0.0266877	-1.1699	0.647382	0.875901	-0.0922805	-0.395348	0.116452	-0.0316837	-0.707392	-1.8481	1.18831	0.144058	0.972873	-1.8481	0.513644	-0.996372	-0.182907	0.801008	-1.38004	-0.489807	-0.626139	-0.789194	0.241886	0.105945	0.164139	-0.593633	-1.8481	0.595301	-0.401933	-1.16989
FGA--chr4---	1.518	0.922477	1.36108	1.25226	0.695177	0.991518	1.04185	0.827678	1.05668	0.919439	1.12902	0.751849	0.70957	-0.0223292	-0.621825	-0.261134	0.523273	1.31525	1.33515	1.43521	1.19938	1.13355	1.04444	1.78543	0.784613	1.63724	0.338297	0.181438	0.962483	1.34749	1.14405	1.74025	-0.0981496	0.806922	1.02963	1.37062	1.39886	1.45579	0.642971	1.29567	1.27249	0.735919	1.10031	1.34083	1.55024	-1.10678	1.35813	1.23807	1.46673
FGB--chr4--+	1.22928	1.26669	0.661691	1.25546	0.867925	1.13906	0.827665	1.24514	1.38048	1.11798	0.56836	0.82657	0.576331	0.224093	-0.850015	0.582385	1.15674	1.04872	1.55933	1.51403	1.22397	1.1904	1.36417	1.95784	1.14296	1.82742	0.644693	0.689342	1.2669	0.972271	1.42179	1.86995	-0.15029	0.445271	0.848378	1.90432	1.41516	1.33225	0.601849	1.27721	1.49646	0.687513	0.908144	1.64164	1.92762	-0.0673061	1.07963	0.843863	1.16414
FGG--chr4---	1.18416	0.599717	1.04078	0.7224	1.06382	0.959308	0.735634	1.26546	1.40086	1.43122	0.466715	0.833521	-0.689533	0.489009	-1.63737	0.62376	-1.63737	1.54407	1.22146	1.59234	1.78045	0.392221	1.30267	2	0.459347	1.86482	0.643475	0.977481	1.13659	1.3176	1.21596	1.71549	-1.63737	0.189419	0.681938	1.79028	1.50535	1.48648	0.0124508	1.24165	1.14045	0.713768	0.600012	1.54783	1.50735	-1.63737	1.55306	0.506706	1.38144
FGL1--chr8---	1.62274	1.43674	0.94481	1.45693	0.582947	0.13881	0.530918	1.03158	0.947804	0.618981	0.846673	0.82187	0.449639	0.585669	0.265116	0.706676	-1.79272	2	0.52497	1.09396	0.91298	1.29126	1.30739	1.64709	0.16618	1.42883	-0.0644682	-0.136355	1.45919	1.63173	0.639251	1.65104	0.276986	0.0670059	0.0493676	1.6495	-0.113818	0.698007	0.152985	0.773452	0.847711	1.15658	-0.260045	0.663766	1.24927	-1.79272	0.847538	0.810211	0.450336
FOS--chr14--+	-0.866734	-0.866734	-0.866734	-0.866734	-0.492881	-0.866734	-0.36307	-0.866734	-0.866734	-0.866734	-0.866734	-0.866734	0.119022	1.44784	-0.866734	-0.866734	-0.866734	-0.866734	-0.866734	-0.442186	-0.866734	-0.866734	-0.866734	-0.866734	-0.866734	-0.866734	-0.866734	-0.866734	-0.866734	-0.866734	-0.476741	-0.866734	-0.866734	-0.866734	-0.866734	-0.866734	0.525208	-0.866734	-0.866734	-0.866734	-0.490463	1.0388	-0.866734	-0.866734	-0.866734	-0.866734	-0.866734	-0.866734	-0.866734
FTH1--chr11---	0.430638	-1.41066	1.226	1.73678	0.150878	0.0295851	2	0.162599	-0.793466	0.602472	2	-0.309836	-1.95432	-0.171918	-1.95432	0.559151	-1.95432	1.32829	0.422865	0.499604	0.371703	1.40524	0.553649	1.00851	-0.0737959	0.77696	0.329161	0.483866	1.45347	0.336188	0.67934	1.22907	-1.95432	1.30588	0.122929	-0.261805	0.600502	-0.817394	0.453621	0.390805	0.452613	0.803226	0.621198	0.644516	-0.444179	-0.0451701	0.931414	0.695057	0.214339
FTL--chr19--+	-0.0292712	-0.776564	0.685737	2	-0.489071	-0.128265	2	-0.00447439	-0.494864	0.267174	2	0.169615	-2	-0.423361	-1.16281	1.07412	-0.545841	1.34761	-1.03632	-0.0525121	-0.408932	1.05135	0.665184	0.350793	0.0995484	-0.469559	0.360009	-0.522079	-0.330161	1.52952	0.741166	1.35149	-1.30828	2	-0.0481459	0.215348	0.847869	-1.30472	0.236594	-0.793584	-0.254211	-0.387034	0.254815	0.457239	-0.904712	-1.39661	0.576232	-0.111637	-0.368511
GADD45B--chr19--+	-0.754529	-0.112586	-0.754529	-0.160198	-0.754529	-0.754529	-0.754529	-0.241596	-0.754529	0.725735	-0.754529	-0.754529	-0.754529	-0.754529	-0.754529	-0.754529	-0.754529	-0.754529	-0.754529	-0.46166	-0.754529	-0.754529	-0.754529	0.120993	0.282125	-0.33405	-0.166621	-0.754529	-0.754529	-0.754529	0.103074	-0.754529	-0.754529	0.0252113	-0.754529	-0.50526	-0.754529	-0.754529	-0.279263	-0.754529	-0.754529	-0.754529	-0.0901124	-0.754529	-0.259701	-0.754529	-0.754529	-0.754529	-0.754529
GC--chr4---	1.94601	1.21281	2	0.984304	0.997026	1.58803	0.44583	1.01023	1.20517	0.303141	0.499545	1.71974	0.863927	0.130744	-1.37491	-1.37491	-1.37491	-1.37491	1.30347	0.961761	1.32654	0.860746	0.667367	1.45615	-0.385731	0.848099	0.350626	0.499519	0.799546	2	0.849833	1.70721	0.0172077	0.481894	1.09864	1.10094	0.301354	0.554727	1.09736	1.34303	0.690371	1.17248	0.395644	1.55321	1.0604	-1.37491	0.803558	0.387759	0.333534
GNB2L1--chr5---	-0.110932	-0.38298	0.958486	-0.00967081	-0.671411	-0.45593	0.911185	-0.175201	-0.9182	-0.648372	-0.792171	1.31027	-1.70185	0.252829	-1.70185	-1.70185	0.841726	-1.70185	-1.11402	-0.326052	-0.039003	-0.00342611	0.285958	-0.496737	-0.434491	-0.378425	-0.77009	0.122586	0.414612	-1.70185	0.0970308	0.678089	-1.70185	0.525079	-0.124426	-0.122566	0.639806	-0.756262	-0.444837	-0.662285	-0.0913422	0.531711	0.54601	-1.70185	-0.901562	0.391828	-1.70185	-0.584188	-0.897253
GSTA1--chr6---	0.787167	0.379482	2	1.2877	0.801405	1.1074	1.19267	1.17124	-0.121919	-0.0220998	0.945281	1.12186	1.07696	0.733447	-1.37085	1.59082	1.12452	0.592253	1.46097	1.18885	2	1.41978	2	1.39974	0.652355	1.25268	0.981372	-0.355247	0.705505	1.55429	-0.104512	1.98515	-1.37085	2	0.723147	1.46278	1.97828	-0.443179	0.484156	0.213832	0.809413	-0.407727	0.420977	0.268043	0.400047	-1.37085	1.95107	0.825957	-0.581498
H3F3AP4--chr1--+	0.0460011	-0.195157	-1.23624	0.0478057	0.0572768	-1.23624	-0.204043	-0.0951233	-0.425365	-0.146163	0.258312	-1.23624	-1.23624	-0.530109	-1.23624	-1.23624	-1.23624	-1.23624	0.373483	0.293895	-0.122439	-0.919337	-1.23624	0.0107397	-0.649694	0.133162	0.28877	-1.23624	-1.23624	0.603759	-0.412067	0.852807	-1.23624	-0.00481745	0.13374	-0.458104	-1.23624	-0.661666	-0.163659	-0.434822	-0.164377	-0.220409	0.0109842	-1.23624	-0.408148	-1.23624	-1.23624	-0.735066	-1.23624
H3F3B--chr17---	-1.26114	-0.695977	0.178691	-0.369447	-1.26114	-0.735244	-0.315539	-0.477944	-1.26114	-0.262514	-1.26114	-1.26114	-0.165855	1.19603	-1.26114	-1.26114	-1.26114	0.635691	-0.703917	-0.0627944	-0.822867	0.254585	0.623165	0.0792649	-0.0597702	-0.890953	-0.743549	-0.279823	-1.26114	-1.26114	-0.50611	0.18103	-1.26114	0.193214	-1.26114	-0.692268	0.285463	-0.734769	-0.529267	-1.26114	-0.529802	0.198513	-0.461666	-1.26114	-0.825496	-1.26114	-1.26114	-0.201673	-0.498436
HBA1--chr16--+	-0.383879	-0.383879	-0.383879	-0.383879	-0.383879	-0.383879	-0.383879	-0.383879	-0.383879	-0.383879	-0.383879	-0.383879	-0.383879	-0.383879	-0.383879	-0.383879	1.73787	-0.383879	-0.383879	-0.383879	-0.383879	-0.383879	-0.383879	-0.383879	0.0889683	-0.383879	-0.383879	-0.383879	-0.383879	-0.383879	-0.383879	-0.383879	-0.383879	-0.383879	-0.383879	-0.383879	-0.383879	-0.383879	-0.383879	-0.383879	-0.383879	-0.383879	-0.383879	-0.383879	-0.383879	-0.383879	-0.383879	-0.383879	-0.383879
HBA2--chr16--+	-0.199981	-0.517622	-0.517622	-0.517622	-0.517622	-0.517622	-0.0847377	-0.517622	-0.517622	-0.517622	-0.517622	-0.517622	-0.517622	-0.517622	-0.517622	-0.517622	-0.517622	-0.517622	-0.517622	-0.517622	-0.517622	-0.517622	-0.517622	-0.517622	-0.517622	-0.517622	-0.517622	-0.517622	-0.517622	-0.517622	-0.517622	-0.517622	-0.517622	-0.517622	-0.517622	-0.517622	-0.517622	-0.517622	-0.517622	-0.517622	-0.517622	-0.517622	-0.517622	-0.517622	-0.517622	-0.517622	-0.517622	-0.517622	-0.517622
HBB--chr11---	-0.788152	-0.788152	-0.788152	-0.788152	-0.788152	-0.788152	-0.788152	-0.788152	-0.788152	-0.788152	-0.788152	0.392606	-0.788152	-0.341349	-0.788152	-0.788152	-0.788152	-0.788152	-0.788152	-0.610063	-0.788152	-0.788152	-0.788152	-0.788152	-0.788152	-0.788152	-0.788152	-0.788152	-0.788152	-0.788152	-0.488857	-0.788152	-0.788152	-0.788152	-0.788152	-0.788152	-0.788152	-0.788152	-0.499151	-0.788152	-0.788152	-0.788152	-0.384132	-0.788152	-0.487255	-0.788152	-0.788152	-0.788152	-0.788152
HINT1--chr5---	0.909611	-1.52544	1.94018	0.912119	-0.198446	0.634476	1.35444	-0.111946	1.14032	0.80832	0.980669	0.388938	-1.52544	-0.324972	-1.52544	-0.102889	-1.52544	-1.52544	0.350235	0.945423	0.239705	1.04306	1.67259	0.413045	0.304056	1.31328	0.613041	-0.871454	1.19377	1.14099	0.655041	1.76044	-0.630167	1.01756	-0.452832	-0.220739	2	0.278242	1.02893	0.0134144	0.608426	0.845528	0.781886	1.00864	0.232546	-1.52544	1.8339	0.600893	0.239738
HIST2H2AA3--chr1---	-0.203049	-0.651877	1.63654	0.322736	-0.651877	-0.651877	-0.651877	0.20415	-0.651877	-0.651877	-0.651877	2	-0.651877	1.896	-0.651877	-0.651877	-0.651877	-0.651877	0.377791	0.0634512	-0.651877	0.327298	1.40765	-0.167098	0.345659	-0.651877	-0.651877	-0.0135629	0.841922	1.19051	-0.651877	1.96864	-0.651877	-0.651877	-0.651877	0.268465	-0.651877	-0.651877	-0.194545	-0.192924	-0.19492	-0.651877	-0.295377	-0.651877	0.177289	-0.651877	0.845286	-0.150052	-0.651877
HLA-A--chr6--+	-0.384129	-1.10996	0.342086	-0.210701	-1.10996	-1.10996	-0.545584	-0.654542	-0.360808	-1.10996	-1.10996	-1.10996	-1.10996	-0.0288534	-1.10996	-1.10996	-1.10996	-1.10996	-0.548007	-1.10996	-1.10996	-0.817175	-1.10996	-0.866698	-0.56806	-1.10996	-1.10996	-0.520997	-1.10996	-1.10996	-0.672956	-1.10996	-1.10996	-1.10996	-1.10996	-1.10996	-1.10996	-1.10996	-0.687986	-1.10996	-1.10996	-0.171455	-1.10996	-1.10996	-1.10996	-1.10996	-1.10996	-0.308443	-0.340784
HLA-B--chr6---	-0.814031	-0.673238	-1.18819	-0.375721	-1.18819	-1.18819	-0.678284	-0.474577	-0.088639	-1.18819	0.0593305	-1.18819	-1.18819	0.0775749	-1.18819	-1.18819	-1.18819	-1.18819	-1.18819	-0.317518	-0.493266	-0.923664	-0.0345099	-0.485867	-0.69859	-1.18819	-1.18819	-1.18819	-1.18819	0.347679	-0.500241	-0.169891	-1.18819	-0.562701	-1.18819	-0.669859	-1.18819	-1.18819	-1.18819	-0.519235	-1.18819	0.141777	-0.890998	-1.18819	-0.49697	-1.18819	-1.18819	-0.46403	-1.18819
HLA-C--chr6---	-0.139657	-0.751726	-1.31927	-0.137997	-0.589062	-0.791159	-1.31927	-0.865784	-1.31927	-1.31927	-1.31927	-1.31927	-1.31927	0.329932	-1.31927	-1.31927	-1.31927	-1.31927	-1.31927	-0.845563	-1.31927	-1.31927	0.98735	-0.284655	-0.779668	-0.427025	-1.31927	-1.31927	0.0531893	0.373457	0.0920401	-0.637394	-0.51643	-0.6299	-1.31927	-0.603413	-1.31927	-1.31927	-0.584315	-0.581995	-0.584853	-1.31927	-1.31927	0.270961	-0.557456	-1.31927	0.69915	-0.255343	-1.31927
HLA-DPA1--chr6---	-0.404963	-0.813696	0.619445	-0.813696	-0.813696	-0.290244	-0.813696	-0.813696	-0.813696	-0.220565	-0.813696	-0.813696	-0.813696	-0.16981	1.07317	-0.813696	-0.813696	-0.813696	-0.259062	-0.813696	-0.813696	-0.524726	-0.813696	-0.573605	-0.813696	-0.813696	-0.813696	-0.813696	-0.813696	-0.813696	-0.813696	-0.813696	-0.813696	-0.813696	-0.248384	-0.813696	0.725721	-0.813696	-0.813696	-0.395742	-0.813696	-0.813696	-0.813696	-0.813696	-0.813696	-0.813696	-0.813696	-0.813696	-0.0545359
HLA-DPB1--chr6--+	-0.806754	-0.806754	-0.806754	-0.806754	-0.806754	-0.806754	0.0905568	-0.806754	-0.806754	-0.806754	-0.806754	-0.806754	-0.806754	0.21051	-0.806754	-0.806754	-0.806754	-0.806754	-0.806754	-0.806754	-0.390863	-0.307573	-0.806754	-0.806754	-0.806754	-0.806754	-0.806754	-0.806754	-0.806754	-0.806754	-0.806754	-0.806754	-0.806754	-0.806754	-0.806754	-0.266933	-0.806754	-0.307264	-0.806754	-0.806754	-0.806754	-0.806754	-0.251677	-0.806754	-0.806754	-0.806754	-0.806754	-0.806754	-0.806754
HLA-DRA--chr6--+	-0.954831	-0.954831	-0.954831	-0.954831	-0.954831	-0.954831	-0.485583	-0.576177	-0.954831	-0.954831	-0.954831	-0.954831	-0.954831	-0.954831	-0.954831	-0.954831	-0.954831	-0.954831	-0.487598	-0.954831	-0.954831	-0.954831	0.106861	-0.752574	-0.954831	-0.954831	-0.214227	-0.954831	-0.954831	-0.954831	-0.591486	-0.0177257	-0.954831	-0.379216	-0.478603	-0.770817	-0.954831	-0.513467	-0.603983	-0.60274	-0.954831	-0.954831	-0.681337	-0.954831	-0.954831	-0.954831	-0.954831	-0.954831	-0.315302
HLA-DRB1--chr6---	-0.851231	-0.373421	-0.851231	-0.851231	-0.851231	-0.851231	0.197573	-0.851231	-0.851231	-0.851231	-0.851231	-0.851231	-0.851231	-0.851231	-0.851231	-0.851231	-0.851231	-0.851231	-0.851231	-0.851231	-0.851231	-0.851231	-0.851231	-0.476251	-0.851231	-0.851231	-0.851231	-0.851231	-0.851231	-0.851231	-0.851231	-0.277165	-0.851231	-0.851231	-0.851231	-0.665695	-0.851231	-0.851231	-0.851231	-0.851231	-0.851231	-0.0644595	-0.175326	-0.851231	-0.482921	-0.851231	-0.851231	-0.463066	-0.851231
HP--chr16--+	1.99811	1.19178	2	1.13765	0.991094	1.16162	0.713265	0.933021	1.19756	0.905513	1.1147	2	1.12652	0.466579	-0.0184531	1.50978	0.840848	2	1.78933	1.61371	1.16294	0.921902	2	1.79374	1.007	1.30727	0.673346	0.130945	2	1.83444	0.969619	2	-0.673511	0.956715	0.821838	1.47285	1.92446	0.801774	1.09069	1.30244	1.68539	0.796507	0.785447	1.86736	1.35464	-0.71805	1.84839	0.66916	1.16298
HPX--chr11---	2	1.39142	1.74553	0.495981	0.996029	0.824114	0.747396	1.86437	1.11615	0.824812	0.258613	2	1.26508	0.534603	-1.12493	1.20169	-1.12493	1.98544	1.64002	1.59665	1.2385	0.501963	1.76087	1.91576	0.850499	1.31503	0.65441	0.622668	1.3288	1.73113	0.726298	2	-1.12493	0.0150284	1.05715	1.55652	2	-0.219165	1.33402	1.33855	1.40347	0.725237	0.525822	2	0.955737	0.238011	2	0.166526	0.12218
HSP90AA1--chr14---	-0.810145	-0.915848	-1.30236	-0.944515	-0.805068	-0.942703	-0.655667	-0.993525	-0.245772	-0.619403	-0.365991	-1.30236	-1.30236	1.51882	-1.30236	-1.30236	-1.30236	-0.00512165	-0.293833	-0.482815	-0.780763	-1.10381	-0.436426	-1.30236	-0.678192	-0.853826	-1.30236	-1.30236	-1.30236	-1.30236	-0.785998	-0.316064	-1.30236	-1.30236	-1.30236	-0.814842	-1.30236	-0.942378	-1.0162	-1.01519	-1.01644	1.10098	-0.755603	-0.219363	-1.00443	-1.30236	-1.30236	-0.428315	-1.30236
HSP90AB1--chr6--+	-1.00082	-1.00082	-1.00082	-1.00082	-0.601897	0.133396	-1.00082	-1.00082	-1.00082	-1.00082	-1.00082	-1.00082	0.0510342	-1.00082	-1.00082	-1.00082	-1.00082	-1.00082	-0.46569	-0.7532	-0.579923	-0.495632	-1.00082	-0.407533	-1.00082	-0.645308	-0.50375	-0.0584138	-1.00082	-1.00082	-0.275727	-1.00082	-1.00082	-1.00082	-0.455388	0.118072	0.484455	-0.495318	-0.598987	-0.597563	-1.00082	-0.107111	-0.233046	-1.00082	-1.00082	-1.00082	-1.00082	-1.00082	0.184394
HSPA1A--chr6--+	-1.0774	-1.35268	-0.387484	-0.754929	-0.865234	-1.00014	-0.977531	-0.82766	-0.317016	-1.35268	-0.434854	-1.35268	-1.35268	0.566986	-1.35268	-1.35268	-1.35268	-1.35268	-0.979142	-1.17983	-0.668677	-1.35268	-1.35268	-0.835966	-1.35268	-1.10452	-1.35268	-0.961188	-1.35268	-1.35268	-0.846542	-1.35268	-1.35268	-1.35268	-0.971951	-0.510281	-1.35268	-0.751805	-1.07219	-1.07119	-1.07242	0.0666333	-1.35268	-1.35268	-0.844135	-0.44852	-1.35268	-1.35268	-0.841397
HSPA1B--chr6--+	-0.934049	-0.934049	-0.934049	-0.934049	-0.934049	-0.934049	-0.934049	-0.934049	-0.934049	-0.934049	-0.934049	-0.934049	-0.934049	0.752579	-0.934049	-0.934049	1.26072	-0.934049	-0.934049	-0.934049	-0.934049	-0.934049	-0.934049	-0.934049	-0.934049	-0.934049	-0.934049	-0.934049	-0.934049	0.600321	-0.934049	-0.934049	-0.934049	-0.934049	-0.934049	-0.416225	-0.934049	-0.934049	-0.934049	-0.934049	-0.934049	0.39462	-0.934049	-0.934049	-0.934049	-0.934049	-0.934049	-0.934049	0.189354
HSPD1--chr2---	-0.0208612	-0.197926	-0.845383	-0.245946	-0.0123568	0.180677	-0.204269	-0.845383	0.00563083	-0.845383	-0.845383	-0.845383	-0.845383	0.382723	1.32632	0.609919	-0.845383	-0.845383	-0.845383	-0.304975	-0.845383	-0.24274	-0.845383	0.334914	-0.845383	0.763117	-0.845383	-0.845383	-0.845383	-0.845383	-0.348961	0.434943	-0.845383	0.820739	-0.194733	-0.379972	0.926421	0.508607	-0.845383	-0.0042943	-0.366427	-0.845383	-0.47172	-0.845383	0.0236999	-0.845383	-0.845383	-0.845383	-0.845383
HSPE1--chr2--+	-0.0672086	-0.519813	-1.15535	1.00677	0.177206	-0.56397	0.733739	-0.647536	-1.15535	-0.485249	0.384308	-1.15535	-1.15535	-0.427908	0.976381	-1.15535	-1.15535	1.79232	0.234949	0.617824	-0.007934	0.309824	0.268492	0.00321955	0.195616	-0.156209	-0.573308	-0.498624	1.57526	1.52225	-1.15535	1.38159	-1.15535	0.113237	-0.0782467	-0.35373	0.583839	-1.15535	-1.15535	-0.329745	0.385141	-1.15535	0.289026	0.625405	-0.302266	-1.15535	-1.15535	-0.63905	-0.297674
IFITM1--chr11--+	-0.75545	-0.75545	-0.75545	-0.257688	-0.75545	-0.75545	-0.22308	-0.75545	0.392542	-0.75545	-0.75545	-0.75545	-0.75545	-0.140065	-0.75545	-0.75545	-0.75545	-0.75545	-0.75545	-0.132858	-0.75545	-0.479271	0.449056	-0.333518	-0.244282	-0.75545	-0.75545	-0.75545	-0.75545	-0.75545	-0.34323	-0.75545	-0.75545	-0.75545	-0.215161	0.0455777	0.715825	-0.75545	-0.75545	-0.355996	-0.75545	-0.75545	-0.75545	-0.75545	-0.75545	-0.75545	-0.75545	-0.75545	-0.75545
IFITM3--chr11---	0.786618	-0.00515125	1.744	-0.34511	0.102378	0.149727	1.248	0.469939	-0.486255	-0.24371	0.107662	-1.19067	-1.19067	-0.577247	-1.19067	0.600968	-1.19067	-1.19067	0.561446	0.450278	0.668385	-0.503657	1.28161	1.2213	0.358538	0.267471	-0.084796	-0.260123	-1.19067	2	0.755792	1.67191	-1.19067	0.188442	-1.19067	0.635328	-1.19067	-0.340691	-1.19067	0.621048	0.108365	0.193466	-0.258818	1.37119	0.147087	-1.19067	-1.19067	0.197774	-0.0203689
IGFBP7--chr4---	-0.636696	-0.636696	-0.636696	-0.636696	-0.636696	-0.636696	-0.636696	-0.149686	-0.636696	-0.636696	-0.636696	-0.636696	-0.636696	-0.636696	-0.636696	-0.636696	-0.636696	-0.636696	-0.636696	-0.636696	-0.636696	-0.069383	0.72881	-0.636696	-0.636696	-0.636696	-0.636696	-0.636696	-0.636696	-0.636696	-0.636696	-0.636696	-0.636696	-0.636696	-0.636696	-0.636696	-0.636696	-0.636696	-0.636696	-0.636696	-0.636696	-0.636696	-0.636696	-0.636696	-0.636696	-0.636696	-0.636696	-0.636696	-0.636696
ITIH4--chr3---	1.74392	2	-0.0852696	0.759724	1.58328	0.849158	0.923478	1.17171	0.00841432	0.72205	1.3043	0.77807	0.472475	0.443597	-1.36846	0.315377	0.780363	1.90795	1.32319	1.09025	0.378738	1.22269	1.36162	1.3558	0.700205	0.890717	0.74709	0.46599	1.64854	2	0.902439	1.52147	-0.223759	0.781802	1.16263	1.4746	1.28656	0.676381	1.03061	1.22583	1.42115	1.05286	0.467812	1.91182	0.96787	0.400288	-0.147695	0.768498	0.915557
LGALS1--chr22--+	-0.211725	-0.638886	-0.638886	-0.638886	-0.206783	-0.638886	0.344756	0.175817	-0.638886	-0.638886	-0.638886	-0.638886	-0.638886	0.0340288	-0.638886	-0.638886	-0.638886	1.33425	-0.638886	-0.638886	-0.638886	-0.638886	-0.638886	-0.638886	-0.638886	-0.638886	-0.638886	-0.638886	0.782801	-0.638886	-0.638886	0.8613	0.19275	-0.638886	-0.0480873	-0.638886	-0.638886	-0.638886	-0.203632	-0.202089	-0.638886	-0.638886	-0.638886	-0.638886	-0.638886	-0.638886	-0.638886	-0.638886	-0.638886
MALAT1--chr11--+	-1.1745	-0.326006	0.160921	-0.519163	-1.40002	-0.278531	-0.462967	-0.149857	-0.562972	-0.408612	-0.426241	-1.70784	-1.70784	1.13799	-0.30307	-1.70784	0.0789029	-1.70784	-1.00974	-0.601961	-0.0372426	-1.17096	-1.70784	-0.330483	-0.643685	-0.778195	-0.292715	-1.27507	-0.695058	-1.70784	-0.350263	-1.20466	-0.756024	-0.438309	-0.99805	-0.844463	-1.70784	0.318892	-1.16549	-0.376669	-1.16589	-1.01822	-0.57581	-1.70784	0.683442	-0.708343	-1.70784	-0.760766	-0.539746
MIF--chr22--+	0.71621	-1.16718	1.71727	1.1846	0.188218	-1.16718	0.754291	-1.16718	-0.317514	-0.0249548	1.13096	-1.16718	0.74502	0.711268	-1.16718	1.46635	-1.16718	1.00241	0.748644	1.23854	-0.665886	0.774623	0.281069	0.365972	0.206944	0.0735816	-1.16718	1.1872	1.61023	0.760843	1.58207	1.72066	-1.16718	0.496306	0.543129	0.367784	1.8706	-1.16718	0.400638	-0.686896	0.194877	0.927049	0.13971	-1.16718	-0.668893	-1.16718	1.61477	0.044636	0.244439
MT1G--chr16---	1.64968	0.329727	2	1.73597	1.85667	0.933684	1.97945	0.744758	0.540095	-0.0401767	1.47282	1.28365	0.749541	0.611015	0.0915794	-0.486927	-1.6621	0.762813	1.44003	0.588253	0.5748	1.19471	0.979802	0.926071	1.39158	0.628639	0.700856	0.368829	-1.6621	2	1.06981	1.99629	-1.6621	1.06728	-0.0922811	0.587219	1.09387	-0.832891	0.370634	0.524784	1.15474	1.11355	1.8037	1.13749	0.332863	-0.414354	0.587919	-0.157598	0.249424
MT2A--chr16--+	1.49996	-0.873279	2	1.73041	0.585165	0.331832	1.30287	-0.199401	0.339964	0.324084	0.374982	0.152066	0.265566	0.233421	-2	0.967501	-0.23916	1.37359	0.501321	0.662137	0.160831	0.996376	1.48613	0.3898	0.586648	1.00257	0.260557	0.104738	-0.595795	2	1.14097	2	-0.683569	0.726077	-0.163674	-0.000259465	1.57271	-0.438995	0.531579	0.503278	0.151752	0.655545	1.03294	1.25644	0.200094	-0.614819	0.622744	0.167279	0.20724
MYL6--chr12--+	0.117809	-0.417252	-1.70072	-0.254956	-0.484188	-0.781242	0.357542	-0.0495728	-1.70072	-0.111267	0.074768	0.0543016	-0.576289	-0.0147261	-1.70072	-1.70072	-1.70072	0.990299	-0.431473	-0.000657007	-0.91774	-0.626199	0.975829	-0.324645	-0.226473	0.00190566	-1.70072	-0.693289	0.35893	0.74375	-0.444571	0.760647	-1.70072	-0.207664	0.041368	-0.323019	0.578079	-0.780515	-0.477449	-0.474157	-0.69265	-0.745347	-1.10021	-1.70072	-0.439495	-1.70072	-1.70072	-1.70072	-1.70072
NACA--chr12---	-0.2281	-1.36978	0.69585	-0.479697	-0.715424	-0.719594	0.540342	-0.438661	-1.96642	0.0705284	0.777392	0.576289	-0.810134	-0.232661	-1.96642	0.0281976	-1.96642	0.0360572	0.287551	-1.2755	-0.302364	0.996242	0.458466	-0.00421303	-1.00292	-0.0992131	-0.285685	-1.34989	0.15158	1.36389	-0.899115	0.698984	-1.96642	0.94935	-0.955241	-0.840685	-0.333678	-0.473175	-0.708493	-0.349955	-0.520214	-0.0335007	0.42027	-0.294656	-0.669464	-1.96642	-0.520345	-0.0979162	-1.16124
NNMT--chr11--+	1.3308	1.30722	2	0.81284	0.384517	0.819316	1.29334	0.890678	0.694275	0.820051	0.224145	1.32956	0.964878	0.245441	-1.23199	1.2167	-1.23199	0.785325	1.2873	0.608403	0.444397	1.02751	2	1.1814	0.505512	1.03613	0.798959	0.390772	0.901704	0.560712	0.262674	2	-0.381732	-0.0322191	0.102776	1.70851	1.59258	-0.672181	0.540791	0.91127	1.00848	0.320378	0.705767	1.98651	1.33149	-1.23199	0.224802	0.127227	1.16564
ORM1--chr9--+	2	0.907198	1.05819	0.567581	0.630245	1.11772	0.639664	1.17095	0.705355	0.458816	0.527395	2	2	0.208815	0.0987308	1.41628	-1.41809	2	1.90675	1.92228	1.37314	0.958831	2	1.75573	0.665919	1.07896	1.05683	0.22892	1.52834	1.87576	0.564622	1.91723	-0.778392	0.791867	0.792418	1.61942	1.61512	0.573896	0.52899	1.24392	1.3465	0.619823	0.390861	1.96219	1.55685	0.169931	1.63253	-0.0018888	0.736426
ORM1-ORM2--chr9--+	2	0.969867	1.64792	0.459524	0.767653	1.22459	0.694363	0.959886	1.14928	0.526479	0.141888	2	2	0.548391	-1.312	1.91115	0.758481	1.94443	2	1.98528	1.32445	0.873482	1.98595	1.61398	0.893319	0.864718	0.797782	0.508038	1.74738	1.81892	0.943965	1.75257	-1.312	0.482306	0.852122	1.57856	1.69692	0.844253	0.722232	1.40981	1.37025	0.453043	0.233238	1.77821	1.33228	-0.0226566	1.92116	0.657453	1.23896
ORM2--chr9--+	2	0.804647	2	-0.14677	0.933093	1.32253	0.570244	0.739627	1.23319	0.638716	1.08439	2	1.6684	0.961609	-1.1647	1.49132	-1.1647	2	1.85686	2	1.36028	0.0587497	2	1.79506	0.931948	1.07748	0.602945	-0.0546182	1.20953	2	0.520269	2	-0.472873	0.093824	0.303737	1.65968	0.756138	0.820805	0.736753	1.3108	1.34929	0.667468	-0.314326	2	1.30776	0.00246571	2	-0.0587513	1.05304
PFDN5--chr12--+	0.146717	-1.36237	0.973951	0.427562	-0.272406	-0.362949	0.0219168	0.0461266	0.361594	-0.697426	0.165441	-1.36237	-0.140176	-0.640526	-1.36237	0.0551517	1.32814	0.754247	-1.36237	-0.296079	-0.223783	0.790294	1.20073	0.324232	-0.343956	-0.630527	-0.376785	-0.710698	-1.36237	-1.36237	-0.23423	0.246903	-1.36237	-0.103544	-0.293555	-0.422766	1.60124	-1.36237	-0.545697	-1.36237	-0.266654	-0.323934	0.670772	0.404683	-0.229329	0.142691	-1.36237	0.0637512	-1.36237
PLG--chr6--+	1.22194	1.19829	0.409522	1.22441	0.790377	1.09796	1.44313	1.02444	1.88161	0.951001	0.729811	0.707765	1.10159	0.00277053	-1.18271	1.36344	-1.18271	2	1.65476	1.46079	1.21017	1.16672	-1.18271	1.11816	1.38417	1.26042	0.362235	0.235884	1.0359	0.68134	0.702995	1.96199	0.6238	1.1517	1.34107	1.29959	1.27197	0.951443	1.24719	1.51321	1.42542	-0.153598	1.09581	0.568471	1.9769	-1.18271	1.50693	0.917073	1.65139
PPP1R15A--chr19--+	-0.700973	-0.700973	-0.700973	-0.700973	-0.700973	-0.700973	-0.700973	-0.700973	-0.700973	-0.0990542	-0.700973	-0.700973	-0.700973	2	-0.700973	-0.700973	-0.700973	-0.700973	-0.700973	-0.700973	-0.700973	-0.700973	-0.700973	-0.700973	-0.700973	-0.700973	-0.700973	-0.700973	-0.700973	-0.700973	-0.700973	-0.700973	-0.700973	-0.700973	-0.700973	-0.126355	-0.700973	-0.700973	-0.700973	-0.700973	-0.700973	1.14846	-0.700973	0.898587	-0.700973	-0.700973	-0.700973	-0.700973	-0.700973
PTMA--chr2--+	-0.947913	-1.0671	-0.39261	-0.26596	-1.18259	-1.09738	-0.0740993	-0.898966	-1.50292	-0.73284	-0.447102	-1.50292	-1.50292	-1.00408	-1.50292	-0.523319	-1.50292	-0.0402004	-0.776458	-0.0141358	-0.287401	-0.334086	-0.526522	-0.621997	-0.576497	-0.420198	-0.821814	-0.169282	0.0441839	-1.50292	-0.920686	-0.6411	-1.50292	-0.381411	-1.06495	-0.763255	-0.310274	-1.50292	-0.7452	-0.74301	-0.938956	0.129781	-0.745127	-1.50292	-0.55555	-1.50292	-1.50292	-0.685923	-1.50292
RARRES2--chr7---	1.51922	0.455124	2	1.24868	0.753107	0.849595	0.70899	0.350636	0.929874	0.656984	0.330621	2	0.915757	0.250382	-1.26126	1.14376	-1.26126	1.15147	0.579237	1.3901	0.640632	0.849932	1.36737	1.23162	0.242502	0.838755	0.923698	0.491854	2	2	1.31158	2	-0.0790037	0.681781	0.839401	0.728279	1.18333	0.0406819	0.678717	0.392194	0.67781	0.687568	0.761397	1.95844	1.02584	-1.26126	1.69317	1.15351	0.189636
RBP4--chr10---	1.52488	0.0706865	2	1.01439	0.895017	0.357977	0.652239	1.75196	0.635839	1.40831	0.75229	1.12708	0.565749	0.775319	-1.91061	1.96977	-1.91061	2	0.830831	1.18649	0.984213	0.917769	2	1.35233	1.07861	1.26007	0.933931	0.192728	1.34446	2	0.886217	2	-0.844731	0.293418	0.934875	1.23963	2	0.295417	1.40232	1.31646	0.415086	0.77112	0.846295	1.49925	1.05575	0.0852086	1.72484	0.892231	1.22588
RPL10--chrX--+	0.0331753	-1.33621	-0.312271	0.318898	-0.947644	-0.579355	0.152359	-0.603656	-1.09266	-1.29202	0.10325	-0.301172	-1.63541	-0.231156	-2	0.114442	-0.637874	0.486586	-0.669949	-0.0153697	-0.0759239	0.270155	0.215005	-0.344793	-0.123473	-0.0468164	-0.742733	-1.02185	-0.944805	0.122897	-0.190218	0.37235	-1.85966	0.349686	-0.155597	-0.76404	0.408049	-1.39344	-0.620992	-0.733177	-0.226708	-0.534933	0.201603	0.0239163	-0.984868	-1.44323	0.103908	-0.426075	-2
RPL10A--chr6--+	-0.222568	-1.08349	0.312144	0.0197218	-0.517555	-0.781746	0.0922397	-0.884416	-0.497678	-1.05542	-0.0204361	-1.59951	-1.59951	0.25694	-1.59951	-0.439644	-1.59951	0.793809	-1.09074	-0.610861	-0.667876	0.0253899	-1.59951	-0.148683	-1.10889	-0.195529	-0.53471	-0.206351	0.232289	1.28077	0.178326	0.314684	-1.59951	0.160592	-0.453599	-0.232636	0.427194	-1.11891	-0.511561	-0.508634	0.03617	-0.266785	0.761107	-0.153647	-0.477806	-1.59951	0.235669	0.0165072	-1.59951
RPL11--chr1--+	-0.0871119	-0.61367	-0.977723	0.497865	-0.585075	-0.340868	0.580067	-0.601022	-1.17741	-0.709182	1.00194	-2	-1.27293	-0.469273	-2	0.571075	-2	0.425909	-0.947867	-0.36417	-0.531629	0.864752	0.235499	-0.267076	0.0201968	-0.52879	-0.57518	-0.729585	-0.130855	0.714324	0.134404	0.729818	-2	1.04942	-0.75744	-0.476062	-0.88624	-1.19872	-0.405538	-1.58232	-0.0109023	-0.197591	0.489137	-0.85457	-0.866304	-2	0.142938	-0.392686	-0.8608
RPL12--chr9---	0.142725	-1.2608	0.445636	0.410594	-0.720228	-0.972578	0.566	-0.841988	-1.75369	-1.23399	0.366792	-0.262774	-0.295679	-0.321414	-1.75369	0.254319	-1.75369	0.532366	-0.292916	-0.183181	-0.677383	0.863571	0.520074	0.0608802	-0.0487774	-0.307285	-0.535276	-0.245409	-0.561756	0.32292	0.036475	0.94807	-1.75369	0.350518	0.129577	-0.513613	0.844463	-0.0705982	-0.190515	-0.711706	-0.558964	0.615771	0.270538	-1.75369	-1.75369	-0.577391	1.20247	-0.0977043	-0.37897
RPL13--chr16--+	-0.329251	-0.544972	-0.347981	0.573932	-0.686584	-0.942482	0.856167	-0.605133	-0.741082	-0.822251	0.276743	-2	-1.02858	-0.399739	-2	-0.0758492	-2	0.576459	-0.242194	-0.324625	-0.712729	0.289668	-0.0805469	-0.330569	-0.154686	0.0721638	-0.731603	-0.719042	-0.760778	1.2091	-0.17502	1.04618	-1.72704	0.394739	-0.747129	-0.636487	0.540628	-0.941639	-0.259674	-0.604332	-0.363738	-0.327875	0.450046	-0.204006	-0.71851	-0.778071	-0.167045	-0.32328	-0.431055
RPL13A--chr19--+	-0.103029	-0.710421	-2	-0.00339108	-0.25562	-0.202507	0.249438	-0.748389	-2	-0.0611729	0.404931	-0.515588	-2	-1.08126	-0.350417	0.0105078	-2	-0.349394	-0.0294936	-0.265971	-0.0321212	-0.25989	-0.360508	-0.0189467	-0.071042	0.164702	-0.619814	-0.497921	-0.819775	-2	0.22849	0.20779	-0.582959	0.324183	-0.705683	-0.704118	0.324106	-0.777398	-0.248022	-0.0789275	-0.341675	-2	0.708883	-2	-0.780701	-0.835682	0.125646	-0.347644	-0.937392
RPL14--chr3--+	-0.0985049	-0.999863	-0.529331	0.716519	0.108666	-1.41402	0.375434	-0.103743	-1.92308	-1.34625	0.735966	1.15928	-1.92308	-0.885379	-1.92308	-0.0941635	-1.92308	-0.0869568	-0.495601	-0.566179	-0.397264	0.68704	0.841339	-0.123882	0.216708	-0.317669	-0.38197	-0.248991	-1.92308	0.381817	0.327139	0.39775	-1.14919	0.275129	-0.995903	-0.47394	-1.92308	-0.779012	-0.0776206	-0.184213	0.0226963	-1.02226	0.204062	-1.92308	-1.18874	-1.92308	0.431283	-0.2098	-1.92308
RPL15--chr3--+	-0.62465	-1.14916	0.636191	0.456113	-0.613409	-0.100188	0.616137	-0.682293	-1.3487	-0.392672	0.984654	-2	-0.469743	0.154075	-2	0.126961	-2	-2	-0.303302	-0.11349	-0.883862	0.0144031	0.650555	-0.03572	-0.692821	0.038818	-0.948123	-0.607844	0.544441	-0.456654	-0.209205	1.30281	-1.29512	0.461451	-0.864067	-0.949181	0.461369	-1.20346	-0.247696	-0.751337	0.249891	-0.319164	0.144558	0.0895601	-0.716749	-2	-2	-0.0431605	-1.32991
RPL17--chr18---	-0.462908	-0.59086	-0.631794	0.356858	-0.452771	-0.653278	0.131596	-0.377479	-1.80776	-1.80776	0.959969	-1.80776	-1.80776	0.0961405	-1.80776	-0.770232	-1.80776	-0.258544	-1.03834	-0.519906	-0.120157	0.425322	-0.773625	-0.15083	-0.826555	0.164346	-0.248073	-0.395259	-1.80776	0.136982	-0.3115	-0.0954639	-1.80776	0.162827	-1.02546	-0.646432	-0.544589	-1.80776	-1.00523	-1.46481	-0.166025	-0.615605	0.51446	0.0404516	-0.80437	-1.80776	-1.80776	-0.362192	-0.520339
RPL18--chr19---	-0.944724	-0.22713	0.690732	0.604534	-0.532174	-0.93929	-0.514389	-0.71263	-1.94525	-1.94525	0.394476	-1.94525	-1.94525	0.147647	-1.94525	-0.863244	-1.94525	0.287411	-0.518594	-0.300833	-0.602664	0.558408	0.815643	-0.362112	-0.408233	0.0562119	-0.445442	-1.10941	-0.781155	0.462126	-0.0370454	0.873445	-1.26429	0.490486	-1.94525	-0.498288	0.992713	-1.49691	-0.644197	-0.641061	-0.322213	-0.141871	-0.0196348	-0.596445	-0.898844	-0.796425	0.39518	0.228982	-1.29561
RPL18A--chr19--+	-0.278381	-1.77506	0.51713	0.395479	-0.887215	-0.701553	0.170569	-0.824864	-1.77506	-1.23342	0.721778	0.41419	-1.77506	-0.0908749	-1.77506	-0.6204	-1.77506	0.607523	-0.0955952	-0.341812	-0.213693	-0.157451	0.594712	-0.401217	-1.28665	-0.634773	-0.5052	-0.388153	-1.77506	-0.242912	-0.497633	1.04078	-1.04838	0.639061	-0.415924	-0.482623	1.16634	-1.77506	-0.691995	-1.10773	-0.387418	-0.448316	0.436906	-0.335685	-0.658391	-1.77506	-0.530001	-0.812062	-1.0818
RPL19--chr17--+	-0.520361	-0.856144	-0.342826	0.519799	-0.963569	-0.483045	0.13847	-0.755484	-1.49132	-1.61625	0.0868009	-0.669461	-1.19168	-0.260144	-2	-1.04286	-2	-0.510219	-1.07175	0.0134154	-0.918343	0.571854	0.481534	-0.709841	-1.34694	-0.379098	-1.13138	-0.372868	-0.0584255	-0.0984964	-0.218179	0.634027	-1.44318	0.308384	-1.30854	-0.627011	0.80969	-2	-0.599019	-0.821086	-0.502823	-0.322812	0.260885	-0.776552	-0.923484	-0.976165	-0.414037	-0.234435	-0.782735
RPL21--chr10---	-0.15989	-0.303222	0.249178	-0.0438459	-1.00112	-1.18525	0.506077	-0.342372	-0.56231	-0.474066	-0.0840863	-1.6664	-0.664308	-0.685601	-1.6664	-0.504156	-1.6664	-1.6664	-0.535248	-0.473202	-0.732858	-0.27964	-1.6664	-0.527077	-0.567249	-0.518624	-0.209796	-1.13209	-0.415979	0.51211	-0.235275	-0.346936	-0.93495	0.264964	-0.790065	-0.365474	-1.6664	-1.6664	-0.576221	-0.994685	-0.0273638	-0.814973	0.509777	0.805362	-0.972328	-1.6664	-0.413163	-0.939251	-0.537257
RPL22--chr1---	-0.537673	-0.976554	-1.59283	1.01109	-0.105922	-0.304977	0.593384	-1.10041	-0.782803	-0.503895	0.598084	1.03354	-1.59283	-0.423873	-1.59283	-0.207621	-1.59283	-1.59283	-0.244677	-0.170729	-1.11492	0.849491	0.461875	0.0553243	-0.597628	0.335814	-0.629709	0.0709973	-1.59283	0.245237	0.11284	1.40162	-1.59283	1.03811	-0.224287	-0.815507	0.82763	-1.59283	-0.521372	0.076823	0.0718787	-0.578062	0.1885	-1.59283	-0.0545104	-1.59283	0.598894	-0.726182	-0.761151
RPL23--chr17---	-0.147538	-1.19373	-1.19373	0.328866	-0.407561	0.0831816	0.622528	0.170966	-1.19373	-0.114046	0.978571	-1.19373	-1.19373	-1.19373	0.855815	0.179711	-1.19373	-1.19373	0.400643	-0.160596	0.140567	0.445023	-1.19373	-0.360357	-0.206984	0.162614	0.316738	0.193207	-1.19373	-1.19373	0.129175	0.365498	-1.19373	0.378671	0.422929	-0.04083	-1.19373	-0.624632	-0.131375	0.0980168	-0.132086	1.09538	0.678135	-1.19373	-0.373532	0.264527	-1.19373	-1.19373	-1.19373
RPL23A--chr17--+	-0.256041	-1.33857	-0.0847547	-0.0166687	-1.00093	-0.64269	0.510526	-1.15972	-0.812286	-0.983017	0.329749	-1.80215	-1.80215	-0.28229	-1.80215	-0.252362	-1.80215	-0.246255	-0.592532	-0.169136	-0.393124	-0.163515	-0.763556	-0.382234	-1.05353	0.0100393	-1.07766	-0.239856	-0.681095	0.150974	-0.649361	0.450379	-1.80215	0.376426	-0.410226	-1.33553	0.376355	-1.06691	-0.152544	-0.822129	-0.996703	-0.300301	0.318586	-0.503214	-0.969266	-0.6958	-0.67857	0.0198203	-0.789825
RPL24--chr3---	-0.290851	-0.440934	1.0965	0.813176	-0.733079	-0.514147	0.504642	-0.86683	-0.712223	-0.911624	0.46099	-1.86831	-0.266721	-0.294991	-1.86831	-0.0582712	0.441565	-0.0511389	0.294251	-0.0793475	-0.511021	0.947673	-0.0631392	-0.209952	0.3554	-0.395194	-0.181407	-1.30883	-0.559001	0.412797	-0.696109	-0.0348961	-1.86831	-0.021534	-0.0761991	-0.506117	0.258198	-0.736052	-0.041899	-0.551833	-0.405774	-0.469958	0.855565	-1.86831	-1.45096	-1.86831	0.0572401	-0.04925	-1.86831
RPL26--chr17---	0.040308	-0.899932	-0.392109	0.906521	-1.15642	-0.316913	0.712824	-0.154101	-1.52831	-0.850895	1.05285	0.248427	-1.23188	-0.594659	-0.55868	0.253816	-2	0.0515979	-1.36075	-0.142508	-0.333126	1.17947	0.248881	-0.281961	0.344131	-0.294908	-0.156539	-0.869743	-0.465671	-0.150395	-0.131465	0.574288	-1.48068	0.697455	-1.34749	-0.533495	-0.286126	-1.15903	0.00788747	-0.997297	-0.381226	-0.613127	0.301758	0.119193	-0.713914	-2	-0.462558	-0.208002	-2
RPL27--chr17--+	-1.06945	-1.4905	-0.0141558	0.154248	-0.744914	-1.4905	0.704318	-0.687442	-0.253129	-0.154233	-0.606318	-1.4905	-1.4905	-0.0660807	-1.4905	1.18865	-1.4905	0.454434	-0.919146	0.355959	-0.444265	-0.417289	0.44159	-0.319165	0.18466	-0.378217	-0.294716	-0.891684	-0.0891344	0.950988	-0.0494653	0.252559	-0.670752	-0.786612	-0.203627	-0.506991	-1.4905	-0.95078	-0.740067	-0.737698	0.0748657	0.680453	-0.0427968	-1.4905	-0.44936	-1.4905	-0.0859786	-0.180053	-0.708454
RPL27A--chr11--+	-0.536057	-0.5501	-0.0592451	0.898196	-0.316577	0.112263	0.771949	-0.45756	-0.294593	-0.911452	0.746691	0.918984	-1.5132	-0.110382	0.401071	1.58622	-1.5132	0.402236	-0.264724	-0.548254	-0.743031	0.434857	0.806283	-0.255706	0.136555	0.0395782	-0.990528	-0.923462	-1.5132	-1.5132	0.0663589	0.203424	-0.705881	0.433442	-0.545969	-0.793349	-1.5132	-1.5132	-0.520962	-0.771811	-0.310697	-0.57346	0.944221	-1.5132	-0.747136	-0.151189	-0.129978	-0.710629	-1.5132
RPL28--chr19--+	-0.574225	-0.69859	0.12055	0.49506	-0.564372	-0.603548	0.295474	-0.732559	-0.923392	-0.652307	0.499383	0.0306449	-0.55423	0.160194	-1.88138	-0.381499	-1.88138	0.199496	-1.13353	-0.50765	-0.325061	-0.0195537	0.385698	-0.405871	-0.584451	-0.253158	-0.95559	-0.863025	0.296669	0.00884841	-0.427061	0.795894	-1.24672	0.388765	-0.53428	-0.692951	0.226971	-0.943138	-0.208235	-0.665856	-1.30081	0.275415	-0.0866759	-0.0849756	-1.07532	-1.88138	-0.793983	-0.590329	-1.88138
RPL29--chr3---	-0.583856	-1.9554	-0.0512373	-0.206772	-0.573051	0.0300712	0.383486	-0.639262	-0.857888	-0.547321	1.20032	-0.400647	-0.959279	-0.106226	-1.9554	0.138589	-1.9554	1.1481	-0.274978	-0.199561	-0.277464	-0.669581	0.8306	-0.443842	-0.177486	-0.447063	-0.507476	-1.9554	-0.13078	0.615096	-0.532804	0.542093	-1.9554	0.556483	-0.813982	-0.410396	0.754002	-0.88051	-0.22153	-0.435918	0.0420778	-0.0298285	0.207809	-1.9554	-0.672381	-1.9554	-0.127414	-0.0249316	-1.9554
RPL3--chr22---	-0.313758	-0.852773	0.553806	0.689584	0.0139649	-0.362705	0.475521	-0.26733	-1.21844	-1.21467	1.15201	-0.230894	-0.623004	-0.319472	-0.817381	-1.53247	-0.227952	0.534675	-0.403792	-0.708552	-0.407178	0.302084	0.28055	-0.493999	-0.330802	-0.223979	-0.801402	-1.5182	-0.208395	-0.262291	-0.0713161	0.266703	-0.548499	1.14825	-0.247436	-0.513421	0.421547	-0.949228	-0.574994	-1.41371	-0.576121	-0.0726749	0.583866	-0.397442	-1.02843	-2	0.445276	-0.680139	-0.875325
RPL30--chr8---	-0.505997	-1.8598	0.445956	0.783816	-0.650664	-0.406055	0.607389	-0.407352	-1.71033	-0.860349	0.765421	0.0667019	-2	-0.776523	-0.740538	0.246753	-2	0.757425	-0.653143	-0.324297	-0.238484	0.684969	0.0671562	-0.463773	-0.382586	-0.304001	-0.259694	0.0215025	-1.18552	0.318502	-0.191694	0.333468	-2	-0.198332	-0.234833	-0.553749	1.17645	-1.14534	-0.0707162	-0.639947	-0.289063	-1.10733	0.545267	0.210551	-0.895798	-2	-0.6444	-0.318123	-2
RPL31--chr2--+	1.04294	-0.555795	0.426302	0.968481	-1.19037	-1.19037	1.35052	-1.19037	-0.356287	0.272909	0.751508	-1.19037	-1.19037	-0.464029	-1.19037	-1.19037	-1.19037	0.939432	-0.564711	0.485257	-0.69827	-0.376893	-1.19037	0.207853	-1.19037	-0.192741	-0.198645	-1.19037	1.0623	0.702294	0.724281	1.34273	-1.19037	0.0762978	-0.114897	-0.244912	-1.19037	-1.19037	-0.36861	-0.366015	-0.36921	0.448558	0.753611	0.587691	-0.701222	-1.19037	1.06646	0.453658	-0.333992
RPL32--chr3---	-0.73484	-1.41457	0.154053	0.689516	-0.724163	0.00151085	0.736266	-0.377987	-0.519137	-0.077415	0.537635	-0.205144	-0.817633	0.0178203	-2	0.171551	-2	0.629415	-0.981506	-0.552398	-0.333301	0.62599	0.166673	-0.39642	-0.58228	-0.253976	-0.317994	-1.14101	0.0734406	-0.227969	-0.209259	0.543662	-1.54282	0.169885	-1.16409	-0.696658	0.000452244	-1.03156	-0.0193086	-0.377155	-0.185355	0.175648	0.532077	-0.326223	-1.36332	-2	-0.185487	-0.284908	-1.18146
RPL34--chr4--+	-0.232873	-0.952063	0.427188	0.468517	-1.15137	0.0230722	0.199499	-0.376283	-1.79096	-0.912584	0.741625	-0.287285	-0.827564	-0.848035	-1.79096	-0.673597	-1.79096	-0.122537	0.382677	0.0590449	-0.893467	1.10693	0.502263	-0.461495	-0.203716	-0.687506	-0.242141	-0.448853	-0.0262852	0.303422	0.179601	0.531416	-1.79096	0.724372	-1.2914	-0.766164	0.545104	-1.00254	-1.14722	-0.582245	-0.743533	-0.97241	0.301179	-1.79096	-1.40777	-1.79096	-0.0230294	-0.0179852	-0.404476
RPL35--chr9---	-0.428974	-0.810115	1.61191	0.243853	-0.589014	-0.592791	0.44161	-0.515161	-1.01175	-0.24171	0.762951	-0.0875152	-1.72198	0.372789	-1.72198	-0.507428	-1.72198	1.22092	-0.539919	0.123879	-0.0796262	0.613466	0.474117	0.0550927	-0.349002	0.0659329	-0.0384447	-0.263135	0.196187	-0.110361	-0.0916391	1.23991	-0.957609	0.584827	-1.17897	-0.916913	-1.72198	-1.21872	-0.411453	-0.258028	0.199868	0.713111	-0.26143	1.17142	-1.30546	-1.72198	-1.72198	0.205209	-0.542019
RPL35A--chr3--+	-0.527759	-1.23545	0.523517	0.487397	-0.678236	-0.938355	0.977053	-0.297659	-1.74351	-0.167393	0.725918	-1.74351	-1.74351	-0.267146	-1.74351	-1.74351	-1.74351	-0.0383214	-0.417825	-0.666237	-0.469863	0.779313	0.321376	-0.459028	-0.452564	-0.48131	-0.949502	-0.861338	-1.74351	-0.228182	-0.337332	-1.1331	-1.02481	0.297943	-0.88245	-0.986545	-0.353165	-0.681026	-0.672334	-1.74351	-0.0305017	0.54609	0.491544	0.290776	-1.35188	-1.74351	-0.512119	-0.0365489	-1.74351
RPL36--chr19--+	-0.031977	-0.538717	1.00763	0.567514	-1.04727	-0.605952	0.047246	-0.527008	-1.75425	-0.248928	1.16162	-0.0921231	-1.75425	0.222631	-1.75425	0.786189	0.59003	-1.75425	-0.552185	0.061358	-0.554345	0.368691	0.780628	-0.643561	-0.16582	-0.389126	-0.20633	-0.800144	0.606658	1.56574	0.138917	0.812853	-1.75425	0.5916	-0.104372	-1.54088	0.403931	-1.24248	-0.595728	-0.796139	-1.34777	-0.335071	0.443838	-1.75425	-0.767016	-1.75425	-0.422447	-1.30785	-1.0127
RPL36AL--chr14---	-0.438151	-0.175811	-1.24498	0.743095	-0.429829	-0.240939	-0.184936	-0.73874	-0.412228	0.215959	0.289889	-1.24498	-0.0171385	0.596065	-1.24498	-1.24498	-1.24498	0.881411	-0.188903	0.0983949	-0.38999	0.215637	1.32996	-0.380886	-0.642607	-0.0289212	0.321169	-1.24498	1.47713	1.42429	0.330501	0.371727	-1.24498	1.12147	0.657318	-0.44585	-1.24498	-1.24498	-1.24498	-0.14028	-0.42513	0.391325	0.467525	-1.24498	-0.394546	0.267034	-1.24498	-0.354019	-0.389968
RPL37--chr5---	-0.292326	-0.681071	0.430596	0.808874	-0.658599	-1.09829	0.476247	-0.847381	-0.434328	-0.340274	0.571234	-1.61113	-0.543043	-0.256437	-1.61113	-1.61113	1.49677	-1.61113	-0.692459	-0.0734623	-0.616107	0.12433	0.226381	0.00962939	-0.0179712	-0.744688	-0.47388	-1.04162	-1.61113	0.0326431	0.0517388	-0.204773	-1.61113	0.268731	-0.38725	-0.789999	-1.61113	-1.61113	-0.121559	-0.650162	0.349061	-0.187725	0.398131	-0.0668886	-0.871346	-0.295844	-0.275361	-0.577971	-1.61113
RPL37A--chr2--+	-0.506604	-1.66991	-1.66991	0.594747	-0.949796	-1.1491	0.449918	0.0643586	-0.934246	-0.136634	0.319872	-1.66991	-1.66991	-0.608267	-1.66991	-1.66991	-1.66991	0.208572	0.159924	0.113462	-0.659419	-0.269764	0.196167	-0.173061	-0.247768	0.182024	0.0739089	0.216298	-0.316423	-0.000582774	0.459282	0.406312	-0.052112	0.239176	0.0106051	-0.613878	0.960269	-0.782226	-0.696816	-1.25406	-0.945644	-0.224376	0.890522	-1.66991	-0.664341	-1.66991	-1.66991	-0.219878	-0.914582
RPL39--chrX---	-0.872445	-1.32691	0.266592	0.231683	-0.867187	-1.32691	1.6168	-1.32691	0.382932	-1.32691	0.896752	0.565075	-1.32691	-0.140486	-1.32691	-1.32691	-1.32691	-1.32691	0.0413903	0.224463	-0.841864	0.454912	-1.32691	-0.322865	-1.32691	-0.343578	0.219268	-0.240859	0.185664	-1.32691	0.0272698	-0.0900381	-1.32691	0.569115	-1.32691	-0.537975	-1.32691	0.455675	-1.32691	-1.32691	-0.864213	0.28853	0.363759	1.17753	-0.487325	-1.32691	-1.32691	0.293557	-0.482806
RPL5--chr1--+	0.0261898	-0.853816	0.373104	0.189043	-1.09769	-0.358965	0.555244	-1.03737	-1.08079	-1.8803	0.528323	-1.8803	-0.0809959	-0.112756	-1.8803	-0.513083	0.714724	-1.8803	-0.866385	-0.590557	-0.0315088	0.469712	-0.517554	-0.0172196	-0.121969	-0.924029	-0.376677	-0.824138	-1.8803	-0.0661071	-1.41392	-0.328137	-1.8803	-0.666146	-0.849413	-0.435959	0.508721	-0.915582	-0.82276	-0.819704	-0.237214	0.398439	-0.236164	-1.8803	-0.361962	-1.8803	-1.8803	0.0246148	-1.05942
RPL6--chr12---	-0.116653	-1.0709	0.909258	-0.0195114	-1.22247	-1.64285	-0.145771	-0.178307	-1.64285	-0.323977	-0.770178	-1.64285	0.447625	-0.557961	-1.64285	-0.35726	-1.64285	1.0099	-0.68947	-0.132586	-0.209041	0.158183	-1.64285	-0.113224	-1.09906	-0.0866835	-0.748995	-0.649745	-0.259726	0.766858	-0.619708	0.293926	-1.64285	0.308041	-1.06808	-0.371108	1.04493	-1.64285	-0.648449	-0.645575	-0.437725	-0.165663	-0.0968726	-1.64285	-1.64285	-1.64285	-0.256611	0.39706	-0.393873
RPL7A--chr9--+	-0.295553	-0.945334	0.123751	0.487541	-0.923723	-0.732164	-0.10212	-1.10527	-1.83976	-0.617591	0.972758	-1.83976	-0.812593	-0.102093	-1.83976	-0.0678759	-1.83976	-1.83976	-0.956286	-0.824297	-0.682387	-0.0305991	1.03308	-0.768441	-0.983856	-0.82245	-0.74608	-1.29208	-1.83976	-1.83976	-0.692269	-1.20297	-1.09001	0.927132	-0.662768	-0.581231	-0.389342	-0.999154	-0.407254	-0.719296	-0.918889	0.145828	0.390872	-0.354677	-1.12832	-1.83976	-1.83976	-1.09442	-0.361497
RPL8--chr8---	0.304751	-1.65989	0.716161	0.27738	-0.974773	-0.816014	0.472264	-0.921963	-1.65989	-0.718985	0.233194	-1.65989	-1.65989	0.0859117	-1.65989	-0.462986	-1.65989	0.80986	-0.772278	-0.431109	-1.65989	0.726777	0.796581	-0.583554	-0.120591	-0.822742	-0.827697	-1.10964	0.230406	1.31238	-0.507026	0.718959	-0.906626	0.842552	-0.75742	-0.395468	1.14704	-0.815346	-0.220677	-1.26426	0.028024	0.0652234	0.347763	0.472227	-0.502367	-1.65989	0.233894	0.599335	-1.65989
RPL9--chr4---	-0.0211758	-1.55229	0.0778244	0.455531	-0.446416	-0.956896	-0.147798	-0.368753	-0.711272	-0.0768433	0.722462	0.383165	-1.55229	0.307041	0.593916	-0.114078	-1.55229	0.595222	-0.485728	-0.326386	-1.55229	-0.214859	-0.118781	-0.258954	-0.519011	0.188622	0.250177	-1.55229	-0.00496384	-1.55229	-0.407683	0.821282	-1.55229	0.630209	-0.131382	-0.745228	0.960792	-1.55229	-0.203255	-0.721081	-1.07896	-0.498696	0.606296	-1.55229	-0.402711	-1.55229	0.723303	-0.352808	-0.688792
RPLP0--chr12---	0.190321	-0.0928985	0.115365	1.04553	-1.00973	-0.888367	0.884916	-0.0796723	-1.46593	-0.811485	0.0377581	0.411561	-1.46593	-0.288594	-1.46593	-0.0707897	-1.46593	0.617267	-0.853962	-0.149847	0.0900603	-0.316427	0.60351	0.00617042	0.328315	0.587826	-0.185141	-0.0570805	-1.46593	-1.46593	0.0775455	1.01174	-1.46593	-0.22698	-0.41399	-0.541161	0.232628	-0.887845	-0.157296	0.368968	-0.158111	-1.46593	0.715054	-1.46593	-0.350779	-1.46593	-1.46593	-0.062326	-0.110523
RPLP1--chr15--+	-0.110125	-0.97396	-0.215349	0.0745062	-0.866853	-0.726459	0.561718	-0.40105	-0.84482	-0.163098	0.584949	0.254307	-2	0.530183	-2	-0.0375911	-2	0.603789	-1.46242	-0.162073	-0.155308	0.13754	-0.0422314	-0.446279	-0.33526	-0.649976	-0.37468	-0.823424	-0.290726	0.0287091	-0.127915	0.0971948	-0.941401	0.302586	-0.850691	-0.967813	0.257806	-0.725569	-0.785131	-0.646941	-0.532714	0.487476	0.0727274	-2	-0.905022	-1.37503	-0.532838	-0.147588	-0.817268
RPLP2--chr11--+	-0.667312	-1.49668	0.297845	0.0233377	-0.481022	-1.04594	0.538509	-0.600685	0.243965	-0.379696	-0.0143599	-0.0314469	-1.49668	0.0914375	-1.49668	-0.407884	-1.49668	-1.49668	-0.437011	-0.217601	-0.0243748	-0.379942	-0.411444	-0.517563	-0.714438	-0.421438	-0.497126	-0.397185	-1.49668	-0.0519277	-0.0351439	0.558268	-0.811455	0.155577	-0.420984	-1.14848	-1.49668	-1.04553	-0.869396	-0.652066	-0.188191	-0.699059	0.205406	-1.49668	-0.846471	-1.49668	-1.49668	-0.401279	-0.84297
RPS10--chr6---	-0.652153	-0.531377	-0.00127997	0.840307	0.00328649	0.0772135	0.147303	0.00636778	-1.18731	-0.300202	0.688437	-0.338592	-0.877883	0.0841042	-1.83952	0.454535	-1.83952	0.862939	0.240254	-0.0411447	-0.118261	0.458496	0.449513	-0.444411	-0.123158	0.163599	-1.38508	-0.977943	0.7906	0.251036	0.456022	-0.159258	-1.83952	0.390737	-0.349653	-0.591115	-0.481636	-0.42538	-0.793353	-0.262356	-0.499154	0.0193876	0.430441	-1.83952	-0.461207	-1.83952	0.794299	0.0241149	0.283482
RPS11--chr19--+	-0.0337348	-0.691592	-1.59714	0.670167	-0.669713	-1.09782	1.00646	-0.604582	-0.89183	-0.648977	1.13666	0.0260031	-1.59714	0.333374	-1.59714	-0.391002	-1.59714	0.203841	-0.00681166	-0.0999944	-0.628341	0.092586	-1.59714	-0.0884328	-0.233673	-0.264033	0.216013	-0.37915	-1.59714	0.00331511	0.351793	-0.227845	-1.59714	0.233182	-1.05789	-0.175735	-1.59714	-0.746081	-0.664195	-0.661499	-0.296456	0.141283	0.763473	-1.59714	-0.257684	-1.59714	-1.59714	0.0833489	-0.425353
RPS12--chr6--+	-0.378748	-0.934471	-0.397851	1.10172	-1.21603	-0.77306	0.898415	-0.129624	-0.978169	-0.449471	0.792646	-0.490341	-2	-0.118675	-2	0.630491	-0.48824	-0.316636	-0.100255	-0.178516	-0.690189	0.577008	0.0443972	-0.196281	0.0178351	-0.0337139	-0.442389	-0.776318	-0.21667	0.507228	0.13879	0.346081	-1.80443	0.81745	-0.34069	-0.928013	-0.288371	-1.30218	-0.594484	-0.590906	-0.0847709	-0.377345	0.4161	-0.609285	-1.17527	-2	-0.471031	0.237307	-0.482584
RPS13--chr11---	0.0349804	-0.770534	-0.0354066	0.221035	-0.67171	-0.830799	0.529711	-0.598884	-0.808384	-0.178539	0.848837	0.238976	-0.905541	-0.428828	-1.86008	-1.86008	0.241218	0.424344	-1.37446	-0.416884	-0.252189	-0.0624188	0.14171	-0.351468	-0.813088	-0.00147341	-0.325501	-1.00486	-0.111629	0.215047	0.0923646	1.13156	-1.86008	0.353717	-0.76631	-0.844705	0.960142	-1.86008	-0.10743	-1.00127	-0.298825	-1.86008	0.0550117	-1.86008	-1.19894	-1.86008	-1.86008	-0.936756	-1.19538
RPS14--chr5---	-0.309198	-1.27242	0.259873	0.43913	-0.567384	-0.321778	0.665042	-0.336637	-1.02757	-1.22837	0.354689	0.334213	-1.4011	-0.00686397	-0.736219	-1.25569	-2	0.742998	-0.776068	-0.191859	-0.513451	0.277388	0.381698	-0.462917	-0.382746	-0.158554	-0.724611	-0.384646	-1.17563	0.857273	0.100269	0.677748	-2	0.210187	-0.756991	-0.589436	0.554391	-0.972967	-0.289532	0.147358	0.0171375	-0.0540352	0.533495	-0.431156	-1.13905	-1.19053	0.355402	-0.389873	-1.67738
RPS15--chr19--+	-0.303882	-1.32185	0.812968	0.727561	-0.798755	-0.440358	0.205109	0.0583825	-1.1719	-0.956039	-1.07108	0.233846	-0.874466	-0.235092	-1.79881	0.14429	-1.79881	-0.198018	-0.239475	-0.33841	-0.603139	0.476777	0.6113	-0.23021	-1.02858	-0.306153	-0.619781	-0.511106	-0.645405	0.586461	-0.478722	0.518719	-1.79881	-0.0172959	-0.739639	-0.598819	0.932199	-1.35459	-0.793214	-0.506597	-0.510424	-0.0119908	0.497485	-0.462391	-0.762014	-1.79881	0.732871	-0.426306	-0.468528
RPS15A--chr16---	-0.266725	-1.20175	0.357607	0.379625	-1.1827	-0.519475	0.745318	-1.12601	-0.713163	-0.395381	0.157959	0.369707	-0.0353227	0.446033	-1.98993	-0.428518	-1.98993	-1.98993	0.130549	-0.344668	-0.369765	0.732775	0.370153	-0.189611	0.0901404	0.151366	-0.30182	-0.288856	-0.860467	-0.0221568	0.222964	0.570228	-1.98993	0.583707	-0.952744	-0.814847	1.01129	-1.55493	-1.1779	-0.24463	-0.728287	-1.22086	0.563286	-0.681251	-1.1508	-1.98993	0.0200741	-0.527241	-1.98993
RPS16--chr19---	0.0763863	-0.767733	0.393588	0.929252	-0.280018	-0.439437	0.731893	-0.587857	-0.255373	-0.997486	0.599208	-0.348244	-1.9095	-0.217307	-1.9095	0.193245	-1.9095	-1.9095	-1.4006	-0.397134	0.149369	-0.147685	-0.188626	0.122227	-0.00150129	0.174132	-1.10286	-1.37614	-0.661331	-0.370067	0.535966	0.598436	-0.736466	0.702152	-0.359749	-0.683904	0.117704	-1.42878	-0.168378	-0.511119	-0.387987	0.0241241	0.49445	0.157145	-0.78752	-0.677703	-0.65852	-0.424231	-1.21295
RPS18--chr6--+	-0.236398	-2	0.311213	0.137954	-0.693088	-0.697219	0.134082	-0.428083	-1.81114	-0.261216	0.412461	0.278592	-0.788065	0.117606	-2	-0.172412	-2	0.253554	-0.474411	-0.329012	-0.403577	0.474688	0.614416	-0.391597	-0.192552	-0.155481	-0.232373	-1.0481	-0.834007	0.255272	-0.0641716	-0.116271	-2	0.486643	-0.189137	-0.560387	-0.668909	-1.97857	-0.449683	-0.82705	-0.138774	-0.1686	0.540744	-0.296203	-1.43551	-2	-0.831144	-0.080332	-1.43116
RPS19--chr19--+	-0.637968	-0.532949	0.634141	0.664128	-0.627486	-0.603117	0.268349	-0.247469	-2	-0.7425	0.0465308	-0.777219	-2	0.268377	-0.629411	-0.0599289	-2	0.574945	-1.15294	-0.139451	-0.577956	-0.158534	0.673183	-0.70817	-0.00157343	-0.649781	-1.43331	-1.11604	-0.541606	0.576709	-0.288821	0.195262	-0.837508	0.556441	-0.420001	-0.889627	0.604225	-1.19617	-0.461103	-0.918828	-0.922428	0.141538	0.43794	-0.337815	-1.01446	-1.06366	-0.538667	-0.167332	-2
RPS2--chr16---	-0.185346	-0.284829	0.536363	0.369872	-0.551004	-0.35215	0.133501	-0.0930833	-0.77875	0.204908	0.181749	0.842868	-0.435642	0.301917	-1.50193	-1.50193	-1.50193	1.04994	-0.584807	-0.0491008	0.2942	0.150806	-0.269275	-0.0304755	-0.978818	-0.00494428	-0.998042	-0.546593	0.451217	0.139078	0.158141	0.956013	-0.251498	0.55316	-0.280111	-0.367684	-1.50193	-1.50193	0.120842	-1.50193	0.242105	0.280541	0.431367	0.701078	0.0263806	-1.50193	-0.168409	-0.470511	-0.759419
RPS20--chr8---	0.123479	-0.722602	-1.33002	0.393978	-0.280204	-0.367412	1.52867	0.225336	-0.531633	-0.256731	0.528748	-1.33002	-1.33002	-0.634764	-1.33002	-1.33002	-1.33002	0.708628	-0.317523	-0.0420794	-1.33002	0.743347	-1.33002	0.294455	-0.0388291	0.679817	-1.33002	-0.275334	-1.33002	-1.33002	0.351144	0.497026	-1.33002	-0.117563	0.277066	-0.718615	1.05567	-1.33002	-0.0493695	-0.270906	-0.0501674	-0.329834	1.03175	-1.33002	-0.00963543	0.119601	0.142177	0.0435695	-0.510292
RPS21--chr20--+	-0.553475	-1.30054	1.31708	0.161251	-0.286645	-0.754665	0.780538	-0.487589	-1.30054	-0.682002	0.120644	-1.30054	-1.30054	-0.629073	-1.30054	0.0180518	-1.30054	-1.30054	-0.722148	-0.8109	-0.241416	0.461638	0.0137397	-0.840156	-0.0535282	-0.916289	-0.763285	0.283272	0.781941	0.449133	-0.516826	-0.140488	-1.30054	0.477725	-0.711013	-0.426511	1.00352	-0.754172	-1.30054	-0.864684	-0.541418	-1.30054	0.164999	-1.30054	-0.848346	-1.30054	-1.30054	-0.200822	-0.50886
RPS23--chr5---	0.0757015	-1.46707	0.0834702	0.347574	-0.887509	-0.788653	0.726158	-0.61069	-1.25914	-0.978534	0.722187	-2	-0.553359	-0.579986	-0.693041	-0.358785	-2	-0.692093	-0.395831	-0.479184	-0.472675	0.683867	0.266477	-0.58372	-0.182484	-0.56536	-0.681559	-0.167995	-1.12772	-0.294147	-0.10229	0.468586	-2	0.369563	-0.476321	-0.668435	-0.0683592	-0.455894	-0.376375	-0.441612	-0.140373	-0.510957	0.457135	-0.391268	-0.335063	-2	-2	-0.0398885	-1.62405
RPS24--chr10--+	-0.517666	-1.35956	0.576226	0.243587	-0.50573	-0.477982	0.623865	-0.638541	-1.55023	-1.04358	0.381399	-0.0442081	-1.23158	0.198283	-2	-1.07332	-2	-0.506879	-0.291492	0.182408	-1.10605	0.735169	0.547802	-0.340691	-0.454374	-0.831586	-0.629822	-1.33462	-0.0264192	0.333562	0.199141	-0.684887	-2	0.363665	-0.269473	-0.743533	-0.214938	-1.74596	-1.14454	-0.494465	-0.499015	-0.096842	-0.071338	-0.790112	-1.82799	-1.00239	-0.404595	-0.302714	-0.796687
RPS25--chr11---	-0.555537	-0.751762	0.260758	0.522113	-0.125336	-0.803364	0.302338	-0.670367	-1.59887	-0.711897	-0.0627716	-1.59887	-1.59887	0.471596	-1.59887	-1.59887	-1.59887	0.0858825	-0.289072	-0.128027	-0.502728	0.689067	0.0747567	-0.256393	0.137462	-0.351796	0.0972689	-0.243627	-1.59887	0.911507	-0.209545	0.746235	-1.59887	0.11333	-0.270764	-0.850976	0.760057	-0.549119	-0.726133	-1.59887	-0.541191	0.0273612	0.352909	-0.192357	-1.21193	-1.59887	-1.59887	-0.463726	-0.502705
RPS27--chr1--+	-0.453844	-1.03296	0.419381	-0.452273	-0.444029	-0.447782	0.334996	-0.825795	-1.56994	-1.56994	0.55641	0.718522	0.0184982	-0.551382	-1.56994	-1.56994	-1.56994	-1.56994	-0.67485	-0.541126	-0.397351	0.0430884	0.220408	0.0748005	-0.702782	-0.377977	-0.730735	-0.637553	-0.271381	-1.56994	-0.234622	0.422024	-0.810329	-0.188104	-0.659866	-1.02943	-0.100455	-1.06981	-0.874559	-0.633639	-1.17271	-0.685733	0.075067	0.996975	-1.15602	-1.56994	0.339798	-0.35563	-1.56994
RPS27A--chr2--+	-0.578047	-0.999071	0.491005	0.456667	-0.241129	-0.450895	0.579181	-1.37632	-1.40892	-0.7583	0.501963	-0.62802	-2	-0.512202	-0.477646	-0.482728	-2	-2	-0.393722	0.0517178	-0.735672	0.365507	0.297968	-0.507529	-0.689251	-0.49837	-0.722908	-0.972726	-0.0474388	0.539331	-0.272209	0.664293	-2	0.506715	-0.638197	-0.860362	0.136448	-1.28491	0.0131029	-0.38105	-0.663174	-0.298648	0.255957	-0.729773	-0.740836	-2	-0.385326	-0.380694	-1.39288
RPS3--chr11--+	-0.801756	-0.116083	0.760948	-0.314434	-0.520736	-1.02884	-0.0156754	-0.906975	-0.775631	-1.27279	0.0635995	-0.366455	-1.75777	-0.102984	-1.75777	-1.75777	-1.75777	-1.75777	-0.557591	-0.696366	-0.359739	-0.0286829	0.111628	-0.919269	-0.589042	-0.318299	-0.80864	-1.28247	-0.645463	-0.385902	-0.761942	0.0783107	-1.75777	0.0904136	-0.736339	-0.80955	-1.75777	-1.02826	-1.16213	-1.16025	-0.958609	-1.00039	0.0821813	0.0839245	-1.40322	-1.75777	-0.642958	-0.117277	-1.13704
RPS3A--chr4--+	-0.241326	-1.44734	0.8643	-0.676871	-0.717713	-1.14534	0.612687	-0.641349	-1.28497	-1.05123	-0.38337	-1.96381	-0.962902	0.166423	-1.96381	-1.96381	-1.96381	-1.96381	-0.0127271	-0.522856	-1.26684	-0.267177	-0.806737	-0.0168826	-0.651517	-0.0149192	-0.354686	-1.06705	-0.130426	-1.96381	-0.679514	-0.214931	-1.96381	0.357525	-1.96381	-0.469617	-0.550474	-1.48279	-0.440542	-1.58009	-0.0386767	-1.11339	0.102157	-1.96381	-1.03591	-1.96381	-0.127043	-0.477622	-1.26683
RPS4X--chrX---	0.18422	-2	-0.693196	0.13594	-0.614751	-1.22594	-0.458171	-0.86705	-1.37552	-0.386365	0.277528	-0.429171	-2	0.179328	-2	-0.859132	0.257679	0.463387	-1.18049	-0.0975084	-0.715752	0.377061	0.145901	-0.623064	-0.336159	-0.0948251	-0.735057	-0.846912	-2	0.228281	0.250314	0.244394	-2	-0.0361671	-0.638903	-1.05883	-0.588669	-0.359811	-0.236365	-0.757458	-0.34896	0.390613	-0.236231	0.112578	-0.427619	-2	0.278308	-0.024742	-0.89455
RPS5--chr19--+	-0.32385	-1.05899	0.368439	-0.271648	0.0794264	-1.58677	0.526477	-0.610544	-1.58677	-1.03029	0.840341	0.00966345	-1.58677	-0.289482	-1.58677	0.177623	-1.58677	-1.58677	0.280515	-0.694415	-0.633912	0.452263	1.08012	-0.102889	0.238806	-0.974306	-0.497712	-0.388822	-1.58677	-0.0126511	-0.27435	0.770984	-1.58677	0.384552	-0.692302	-0.800436	1.19526	-1.58677	-0.474035	-0.901156	0.380522	-0.717726	0.465326	0.52644	-0.638553	-1.58677	-1.58677	-0.0680356	-1.58677
RPS6--chr9---	-0.288022	-1.27416	-0.811139	0.181217	-0.60235	-0.649357	-0.272883	-0.804159	-0.457378	-0.707863	0.433952	-0.554242	-0.215013	-0.0956492	-2	-0.382921	-2	-2	-1.28528	-0.761124	-0.315201	0.490528	-2	-0.412164	-0.320513	-0.312045	-0.363618	-1.24789	0.430815	0.509607	-0.327892	-0.0336914	-0.959158	0.237024	-0.987153	-0.82821	-0.0682584	-1.32882	-0.727627	-1.04457	-0.367543	-1.29619	0.488104	-0.027121	-0.552732	-2	-0.268069	-0.373951	-0.681152
RPS7--chr2--+	-0.653675	-1.79756	-0.395461	0.527835	-0.317431	-0.647463	0.514722	-0.231362	-1.07418	-0.289882	0.381733	-0.132832	-0.169572	-0.444775	-1.79756	-0.56052	-1.79756	0.0495621	-0.166487	-0.43253	0.21456	0.534633	0.439199	-0.584916	-0.0403123	-0.575919	-0.082853	-0.548364	-0.466669	-0.156101	-0.013577	0.87659	-1.79756	0.676091	-0.864827	-1.24359	1.56137	-0.924696	-0.174342	-1.38866	-0.310917	-0.891338	0.623531	-0.255493	-0.601222	-1.79756	0.159727	-0.553015	-1.79756
RPS8--chr1--+	-0.508182	-0.813013	-0.164365	0.200959	-0.863151	-0.687418	0.270956	-0.0120858	-1.20315	-0.29066	0.0953086	-1.77439	-1.77439	0.115119	-1.77439	0.426181	-1.77439	0.592561	-0.486377	-0.157021	-0.110439	0.62164	-0.325401	-0.0991912	-0.271112	-0.0754982	-0.700073	-0.60105	-1.77439	-1.77439	0.28471	-0.914983	-1.77439	0.178982	-0.335884	-1.0368	-1.77439	-1.77439	-0.0846951	-1.01661	-0.858674	0.314841	0.213757	-1.77439	-1.43939	-0.737207	-0.721055	0.0694799	-1.18788
RPS9--chr19--+	0.403283	-0.671261	1.10276	0.42312	-0.579396	-0.436586	0.647656	-0.612021	-1.60818	-0.610001	1.0057	0.0373741	-2	0.30233	-2	0.239226	-2	0.247499	-0.885206	-0.0680597	-0.405282	0.622672	-0.480536	-0.700117	0.230974	0.0433485	-0.455496	-1.76509	-0.360057	0.0102496	0.0324835	1.04917	-0.728206	0.57263	-0.0874406	-0.663787	0.854859	-2	-0.0110675	-0.829381	0.0608902	-0.2504	0.504636	0.326893	-1.12837	-1.00958	0.0607326	0.026764	-1.58856
RPSA--chr3--+	-1.24062	-0.167172	0.379927	0.564779	0.0931096	-1.24062	-0.176334	0.180049	-0.404536	-1.24062	-1.24062	-1.24062	-1.24062	-0.0340586	-1.24062	-1.24062	-1.24062	-1.24062	-0.613458	-0.165113	-1.24062	-0.42519	-1.24062	-0.545298	-1.24062	-0.0196935	-0.658064	-0.136135	-1.24062	0.65658	-1.24062	-0.476378	-1.24062	0.0290851	-0.601384	-0.99362	1.74859	-0.231763	-0.416888	-0.414287	-1.24062	-0.193208	-0.134587	-1.24062	-0.386784	0.277447	0.301089	-0.346093	-1.24062
S100A11--chr1---	-0.84308	-0.84308	-0.84308	-0.84308	-0.84308	-0.84308	-0.84308	-0.84308	-0.84308	-0.84308	0.0421437	-0.84308	-0.84308	-0.179002	-0.84308	-0.84308	-0.84308	-0.84308	-0.271053	-0.84308	-0.84308	-0.84308	-0.84308	-0.84308	-0.84308	-0.463057	-0.84308	-0.84308	0.559937	-0.84308	-0.84308	-0.146023	-0.84308	-0.84308	-0.84308	-0.84308	-0.84308	-0.84308	-0.413542	-0.84308	-0.84308	0.112253	-0.84308	-0.84308	-0.84308	-0.84308	-0.84308	-0.84308	-0.84308
S100A6--chr1---	-0.79435	-0.79435	-0.79435	-0.79435	-0.79435	-0.79435	-0.291104	-0.79435	-0.79435	-0.79435	-0.79435	0.742948	-0.79435	-0.79435	-0.79435	-0.79435	-0.79435	-0.79435	-0.79435	-0.562486	-0.79435	-0.79435	-0.79435	-0.79435	-0.79435	-0.79435	-0.79435	-0.79435	-0.79435	-0.79435	-0.79435	-0.79435	-0.79435	-0.79435	-0.79435	-0.79435	-0.79435	-0.79435	-0.79435	-0.79435	-0.79435	-0.79435	-0.79435	-0.79435	-0.402595	-0.79435	-0.79435	-0.79435	-0.79435
SAA1--chr11--+	1.65801	2	2	2	1.09437	0.564008	0.620241	-0.0977439	2	0.67897	-0.0343952	2	0.929112	0.590123	-0.724841	0.292299	-0.724841	1.37397	0.876192	2	-0.114167	1.06852	1.99543	0.27224	2	1.51183	2	-0.724841	0.88155	2	2	2	-0.0847104	0.818675	0.280061	0.970797	1.66051	2	0.498215	0.888752	2	0.443887	-0.256478	0.543104	0.258832	-0.724841	0.371931	1.25896	2
SAA2--chr11---	1.18479	2	-0.569541	2	0.604048	0.31748	1.67162	0.465778	2	0.0206216	0.284471	2	-0.569541	0.492149	-0.569541	1.30165	-0.569541	1.30903	-0.569541	2	-0.135487	-0.282017	0.684444	0.193844	2	1.75766	1.87398	-0.569541	2	2	2	1.80494	-0.569541	-0.569541	-0.00705836	1.28506	0.962171	2	0.403596	-0.153679	2	1.24377	0.40369	-0.569541	1.56619	0.766252	-0.569541	1.04113	2
SAA4--chr11---	1.61142	1.49956	2	1.52478	0.466023	0.709997	0.525326	1.33172	-0.00600949	0.853828	1.79667	1.77228	0.985725	-0.799062	-0.799062	1.65899	-0.799062	2	1.48029	2	0.713481	1.01335	2	1.57597	2	0.54024	1.38169	-0.799062	2	2	0.701315	2	-0.799062	1.25896	1.36099	1.36315	2	-0.237116	0.66429	1.72466	1.3469	0.75924	0.572182	1.61679	0.876908	-0.799062	2	1.46704	0.518499
SAT1--chrX--+	0.409238	0.434119	1.16201	0.993778	-0.301448	-0.884043	-0.513056	0.0727584	-0.282205	-0.196951	1.48754	-1.34889	-1.34889	0.448347	-1.34889	-0.226022	-1.34889	-1.34889	-0.25606	-0.109844	-0.446976	-0.0991865	-1.34889	0.239061	-0.0795539	-0.390038	-0.568174	-0.214988	-1.34889	-1.34889	0.0337497	0.882816	-1.34889	0.998764	0.304634	-0.406328	0.0181821	-0.556588	-0.295646	-0.134219	-0.138002	0.269516	0.0950805	0.0508545	0.163596	-1.34889	0.427754	0.215582	0.0444266
SERF2--chr15--+	0.854501	-0.0718539	2	1.20388	0.370385	0.0236948	1.44369	0.258622	-0.597398	-0.226966	1.6755	0.706273	-1.90647	0.622245	0.149911	0.92792	-1.90647	0.151163	-0.0895092	0.432223	-0.196579	1.21187	0.585205	0.601842	-0.134243	0.406981	0.439906	-0.0304187	-1.90647	1.15952	0.781528	1.81729	-1.03922	1.19564	0.436001	0.571521	0.974549	-0.62438	0.653081	-0.24548	0.566839	-0.323076	0.94893	-0.188658	-1.08354	-0.443349	2	0.280104	-0.567694
SERPINA1--chr14---	2	0.856232	1.26964	1.07147	0.263266	0.795642	1.29283	1.46998	-0.0322336	0.550318	1.16801	2	0.680429	0.463373	0.660862	1.14266	0.590797	2	1.25297	1.43632	1.18445	1.05193	2	1.75841	0.849972	1.38791	0.242946	0.309897	1.49905	1.89237	1.29501	2	-0.419239	1.20164	0.0163153	1.50112	1.75472	0.119897	0.946671	0.51657	1.45384	0.181853	1.19263	2	1.31471	-1.41625	2	0.747537	0.256498
SERPINA3--chr14--+	1.77918	1.16534	1.10154	0.917807	0.12525	0.92435	0.184929	1.1109	1.034	0.515514	1.46434	2	1.07139	-0.452868	-1.14786	1.32578	1.44255	2	0.837235	1.42037	0.834298	0.121291	0.876554	1.9762	1.34592	1.69359	0.743922	1.46431	1.79982	2	0.532664	1.56465	-0.288939	1.12008	0.458613	1.46438	1.70549	-1.14786	0.900374	1.68488	1.11544	0.420327	0.809643	1.75465	1.16899	-1.14786	0.323776	0.89213	0.545641
SERPING1--chr11--+	1.65979	0.704938	1.15497	0.963744	1.05298	1.11992	0.885662	0.771989	0.163227	0.971326	-0.221922	1.507	0.683198	-0.462795	-1.18611	0.234298	-1.18611	2	1.20119	1.53384	0.576376	-0.0157875	1.38221	1.77136	0.64063	1.36495	1.09791	-0.53311	1.05717	1.97419	0.720561	1.15808	0.640486	0.440063	0.485835	0.907761	0.543211	0.135415	0.818027	1.17529	1.75576	-0.145558	0.945753	0.584541	1.1162	-1.18611	0.345502	0.792918	1.6795
TF--chr3--+	1.6669	1.86339	0.46235	0.881018	1.19011	1.56292	0.634036	1.4676	1.41896	1.16474	0.802106	0.779459	0.644171	0.456547	-0.799505	0.250494	-0.33835	0.793602	1.52377	1.37056	1.15372	0.887997	0.974916	1.70011	0.760928	1.58711	0.643947	0.266496	-0.323049	1.18741	1.08284	1.51732	0.179381	0.948353	1.45772	2	0.590473	0.945204	1.54161	1.00372	1.72188	-0.85742	1.19114	1.18069	1.49063	-0.719895	1.27854	0.623439	1.42886
TIMP1--chrX--+	-0.539277	-0.921398	1.02691	-0.434493	-0.921398	-0.921398	-0.40064	0.253176	-0.921398	-0.366885	-0.118975	1.31988	-0.921398	-0.319435	-0.921398	-0.921398	-0.921398	0.84369	-0.921398	0.54591	0.545389	-0.921398	1.21602	-0.508669	-0.921398	-0.0946036	-0.921398	-0.921398	0.350385	1.29433	-0.518168	1.02949	-0.921398	0.128363	-0.392893	0.162773	2	-0.921398	-0.240356	0.19039	-0.532356	-0.921398	-0.17745	0.552183	0.789027	-0.921398	0.353249	-0.494156	-0.921398
TMSB10--chr2--+	-0.65204	-1.19859	-0.105195	-0.521447	-1.19859	-0.79923	-0.480509	-0.240055	-1.19859	-0.74607	-0.543757	-1.19859	-1.19859	-0.384515	-1.19859	-1.19859	-1.19859	-1.19859	-0.775441	-1.00279	-0.86577	-0.978126	-0.237068	-0.861775	-1.19859	-0.374823	-1.19859	-1.19859	-1.19859	0.6096	-1.19859	-0.682951	-1.19859	-0.677284	-1.19859	-0.890084	0.487052	-0.798869	-0.880845	-1.19859	-0.881106	-0.0901429	-0.591477	-1.19859	-0.622501	-1.19859	-1.19859	-0.595047	-0.261387
TMSB4X--chrX--+	-1.33164	-0.985198	-1.80167	-0.64348	-1.53039	-0.639642	-0.70457	-0.856569	-1.80167	-1.14949	-0.489505	-0.228706	-1.08637	-0.894427	-0.563655	-1.80167	-1.80167	-1.80167	-0.838599	-0.625622	-1.1353	-1.03019	-0.974764	-1.05562	-1.01709	-0.646582	-1.80167	-0.805183	-0.90911	0.0441644	-0.605245	-0.235888	-1.27955	-0.68284	-1.43075	-1.33612	-0.0671939	-1.21628	-0.713062	-1.15811	-0.804656	-1.19391	-1.1599	-0.767486	-1.13855	-0.920818	-0.9071	-1.10976	-1.30357
TTR--chr18--+	0.870893	-0.261291	2	0.768451	1.10359	0.962972	0.766678	0.847881	-0.233726	0.721821	1.34218	1.99182	-0.167683	0.436002	0.209111	1.68598	-2	1.82573	1.17264	1.16964	1.07661	1.10361	2	0.931895	1.79142	0.900723	1.58879	-0.398682	1.25154	2	0.840056	2	-1.22838	1.24505	0.940795	0.982242	2	-0.261835	0.838098	0.567263	0.376182	0.24489	0.730958	1.36556	0.421636	-0.666763	0.975146	0.866903	-0.0989168
UBA52--chr19--+	-0.221583	-1.67334	0.754287	0.625448	-1.27346	-0.536402	1.0408	-0.666999	-0.958235	0.332858	0.481017	-0.0276596	-1.67334	-0.336033	-1.67334	-0.450454	-1.67334	-1.67334	-0.25374	-0.079194	-0.309464	-0.123481	0.537826	-0.382996	-1.15607	-0.076791	-1.67334	-0.438437	-0.357677	-0.0506626	0.0902309	0.868358	-0.903723	0.358793	-0.751279	-0.551762	0.883338	-0.535586	-0.526279	-1.67334	0.0512136	0.364844	0.162064	-1.67334	-1.67334	-0.374935	-0.354714	-0.908249	-0.93912
UBB--chr17--+	-0.526693	-0.205798	-1.62566	0.196096	0.648615	-0.284334	-0.990088	-1.11279	-0.255123	-1.62566	-0.646323	1.61711	0.273018	0.478696	-1.62566	1.62438	-1.62566	0.528589	0.049143	0.165155	0.469694	-0.802844	1.61772	0.261926	-0.261254	-0.0310607	0.182462	-1.62566	-0.073479	1.58429	0.454951	0.93652	-0.166915	0.0260626	0.072554	0.674532	0.895306	-1.02786	-0.068929	-0.791841	0.266444	1.45995	-0.717691	1.4426	0.157257	-1.62566	1.13662	-0.72303	-0.759451
UBC--chr12---	-1.0004	-0.475006	-1.71324	-1.195	-0.993051	-0.543495	-0.484566	-1.26598	-0.9775	-0.422495	-0.357177	-1.71324	-1.71324	0.595546	-1.71324	-0.455068	-1.71324	-1.71324	-0.0543043	-0.151507	-0.957853	-0.825946	-0.459182	-0.0671145	-1.71324	-1.06366	-0.838446	-0.442704	-1.71324	0.645073	-0.711917	-0.606342	-0.441097	-0.595923	-1.71324	-0.559299	-1.71324	-1.1919	-0.533081	-1.29735	-0.0631749	-0.791536	-0.921416	-1.71324	-0.961879	-1.71324	-1.71324	-0.663911	-0.4909
VTN--chr17---	1.37051	0.873403	1.87112	0.721667	1.16411	0.727647	0.443923	1.13346	0.789959	0.748315	0.404627	1.62342	0.730786	0.197273	1.6651	0.775699	0.387141	1.25068	1.31905	1.13246	1.34407	0.786879	2	1.42529	1.19565	1.11676	0.510598	0.404603	1.8644	0.361244	0.668883	2	-0.584525	0.498467	0.819954	1.21147	2	0.947268	1.34199	0.859912	1.28746	0.133705	0.855965	1.61961	0.981796	0.0193514	1.48724	0.832723	0.0897585
[truncated: 398 more columns]
