# Supplementary material for: Long-read single-cell sequencing reveals expressions of hypermutation clusters of isoforms in human liver cancer cells
Source: eLife. 2024 Jan 11;12:RP87607. doi: 10.7554/eLife.87607 (PMC10945587; doi:10.7554/eLife.87607)
Supplement: Supplementary file 7. [file elife-87607-supp7.xlsx]

## Sheet: in
Supplemental table 7: Genes with SD>=1.4
Cell	N_AAAGGATGTGTACAGG	N_AACCTTTCAGAAGCGT	N_AACGTCACAGAGACTG	N_AAGACTCAGGGAGAAT	N_AAGCGTTAGGTGCGAT	N_AATGGAAGTATAGGGC	N_AATGGCTTCCCGAACG	N_ACACTGAGTATTCCGA	N_ACACTGATCACTGGTA	N_ACCTACCAGCTGACTT	N_ACCTGTCCAAAGAGTT	N_ACGGAAGAGCAAACAT	N_ACGTACACATCAGCAT	N_ACGTACATCGCAACAT	N_ACGTAGTAGGCCCAAA	N_AGAAATGAGGGCGAGA	N_AGAACAATCGCGCTGA	N_AGACAAAGTATTGCCA	N_AGCGTCGCAGTTGGTT	N_AGGAGGTGTTAGCTAC	N_AGGCATTAGTAAGCAT	N_AGGGTCCCACGGCGTT	N_AGTCAACTCCTCTGCA	N_ATACCTTTCCGGGACT	N_ATAGAGATCAGTCAGT	N_ATCTTCAGTTCCCACT	N_ATGCCTCGTGTGTCGC	N_ATGCCTCTCATGCCAA	N_ATTCAGGTCGCTGTTC	N_CAACAGTCACCCTAAA	N_CAACAGTCACCTCGTT	N_CAACAGTTCGATGCTA	N_CAACGATTCCGGACGT	N_CAAGAGGCAATAGTCC	N_CAATTTCGTGGACTGA	N_CAATTTCTCATCCCGT	N_CACGAATTCATCGCTC	N_CACTGTCCAGTCTTCC	N_CAGATACCAAGTAGTA	N_CAGATACGTTAGCTAC	N_CAGATACTCGGCTGAC	N_CAGATTGGTGAAGCGT	N_CAGGTATAGAGAGCAA	N_CATAAGCCACTTACAG	N_CATCCACAGATCACCT	N_CATGAGTCATTGGATC	N_CATTCATAGAACTCCT	N_CATTCATTCCGATGCG	N_CATTCCGTCGAACACT
Group	Normal	Normal	Normal	Normal	Normal	Normal	Normal	Normal	Normal	Normal	Normal	Normal	Normal	Normal	Normal	Normal	Normal	Normal	Normal	Normal	Normal	Normal	Normal	Normal	Normal	Normal	Normal	Normal	Normal	Normal	Normal	Normal	Normal	Normal	Normal	Normal	Normal	Normal	Normal	Normal	Normal	Normal	Normal	Normal	Normal	Normal	Normal	Normal	Normal
Cluster	A	A	A	A	A	A	A	A	A	A	A	A	A	A	A	A	A	A	A	A	A	A	A	A	A	A	A	A	A	A	A	A	A	A	A	A	A	A	A	A	A	A	A	A	A	A	A	A	A
APOA1--chr11---	1.45889	0.930692	2	0.272677	0.552234	1.12423	0.74909	1.07883	1.18041	0.314308	1.30675	2	0.116449	0.548216	0.508085	2	0.360538	1.92885	1.34194	1.64944	1.28988	1.08033	2	1.55096	1.45859	1.1053	1.21603	0.111307	1.57081	2	0.407736	2	0.296885	0.533516	0.550584	2	1.98193	0.897029	0.897974	0.982181	0.97796	0.576571	0.548657	1.90921	1.28388	0.578488	1.35071	0.645709	0.970671
APOA2--chr1---	0.806151	0.0877229	2	2	0.54286	0.407827	1.37634	0.602188	0.365496	0.572041	2	1.37846	-0.127628	0.434452	-0.173567	1.85448	-2	1.94373	0.970404	1.15419	0.910722	1.07512	2	1.13117	0.96947	1.60845	0.872489	-0.215262	1.77657	2	0.898282	2	-1.5307	1.94141	0.792686	0.932201	2	-0.143246	0.743121	0.783587	0.327777	0.684057	0.818032	1.29572	0.609325	-0.253576	1.54366	0.554867	0.27652
APOC1--chr19--+	0.794455	0.167817	2	1.97457	0.807338	0.59533	1.64909	0.855097	-0.0653664	0.419393	1.92271	1.13603	0.266525	0.584544	-0.919565	1.53521	-2	1.32547	0.802361	0.951829	0.968856	1.89726	1.76112	1.28752	1.21957	1.25756	0.856839	0.395756	1.39138	2	1.36606	2	-0.733817	1.68401	0.734031	1.01739	1.45841	-0.0943693	1.0326	0.920345	1.15744	0.646337	1.49088	0.828887	0.430417	0.0953775	1.04364	1.41452	0.338643
APOC3--chr11--+	1.05704	0.476934	2	1.99836	1.0571	0.824114	1.32046	1.09275	0.655351	1.07785	1.85001	1.44654	0.061623	0.394074	0.242829	2	-0.208718	1.83884	1.56801	1.17625	1.25294	1.02288	1.74384	1.31066	1.32435	1.49904	0.808253	0.443074	0.887779	2	1.33976	2	-0.0586999	1.75407	1.01137	1.59821	1.44099	0.269995	1.25342	1.11107	1.02922	0.273093	1.15415	1.67124	0.516445	-0.498054	1.5635	1.09718	0.64609
HBA2--chr16--+	-0.199981	-0.517622	-0.517622	-0.517622	-0.517622	-0.517622	-0.0847377	-0.517622	-0.517622	-0.517622	-0.517622	-0.517622	-0.517622	-0.517622	-0.517622	-0.517622	-0.517622	-0.517622	-0.517622	-0.517622	-0.517622	-0.517622	-0.517622	-0.517622	-0.517622	-0.517622	-0.517622	-0.517622	-0.517622	-0.517622	-0.517622	-0.517622	-0.517622	-0.517622	-0.517622	-0.517622	-0.517622	-0.517622	-0.517622	-0.517622	-0.517622	-0.517622	-0.517622	-0.517622	-0.517622	-0.517622	-0.517622	-0.517622	-0.517622
HBB--chr11---	-0.788152	-0.788152	-0.788152	-0.788152	-0.788152	-0.788152	-0.788152	-0.788152	-0.788152	-0.788152	-0.788152	0.392606	-0.788152	-0.341349	-0.788152	-0.788152	-0.788152	-0.788152	-0.788152	-0.610063	-0.788152	-0.788152	-0.788152	-0.788152	-0.788152	-0.788152	-0.788152	-0.788152	-0.788152	-0.788152	-0.488857	-0.788152	-0.788152	-0.788152	-0.788152	-0.788152	-0.788152	-0.788152	-0.499151	-0.788152	-0.788152	-0.788152	-0.384132	-0.788152	-0.487255	-0.788152	-0.788152	-0.788152	-0.788152
HSP90AA1--chr14---	-0.810145	-0.915848	-1.30236	-0.944515	-0.805068	-0.942703	-0.655667	-0.993525	-0.245772	-0.619403	-0.365991	-1.30236	-1.30236	1.51882	-1.30236	-1.30236	-1.30236	-0.00512165	-0.293833	-0.482815	-0.780763	-1.10381	-0.436426	-1.30236	-0.678192	-0.853826	-1.30236	-1.30236	-1.30236	-1.30236	-0.785998	-0.316064	-1.30236	-1.30236	-1.30236	-0.814842	-1.30236	-0.942378	-1.0162	-1.01519	-1.01644	1.10098	-0.755603	-0.219363	-1.00443	-1.30236	-1.30236	-0.428315	-1.30236
HSPA1A--chr6--+	-1.0774	-1.35268	-0.387484	-0.754929	-0.865234	-1.00014	-0.977531	-0.82766	-0.317016	-1.35268	-0.434854	-1.35268	-1.35268	0.566986	-1.35268	-1.35268	-1.35268	-1.35268	-0.979142	-1.17983	-0.668677	-1.35268	-1.35268	-0.835966	-1.35268	-1.10452	-1.35268	-0.961188	-1.35268	-1.35268	-0.846542	-1.35268	-1.35268	-1.35268	-0.971951	-0.510281	-1.35268	-0.751805	-1.07219	-1.07119	-1.07242	0.0666333	-1.35268	-1.35268	-0.844135	-0.44852	-1.35268	-1.35268	-0.841397
MALAT1--chr11--+	-1.1745	-0.326006	0.160921	-0.519163	-1.40002	-0.278531	-0.462967	-0.149857	-0.562972	-0.408612	-0.426241	-1.70784	-1.70784	1.13799	-0.30307	-1.70784	0.0789029	-1.70784	-1.00974	-0.601961	-0.0372426	-1.17096	-1.70784	-0.330483	-0.643685	-0.778195	-0.292715	-1.27507	-0.695058	-1.70784	-0.350263	-1.20466	-0.756024	-0.438309	-0.99805	-0.844463	-1.70784	0.318892	-1.16549	-0.376669	-1.16589	-1.01822	-0.57581	-1.70784	0.683442	-0.708343	-1.70784	-0.760766	-0.539746
ORM1--chr9--+	2	0.907198	1.05819	0.567581	0.630245	1.11772	0.639664	1.17095	0.705355	0.458816	0.527395	2	2	0.208815	0.0987308	1.41628	-1.41809	2	1.90675	1.92228	1.37314	0.958831	2	1.75573	0.665919	1.07896	1.05683	0.22892	1.52834	1.87576	0.564622	1.91723	-0.778392	0.791867	0.792418	1.61942	1.61512	0.573896	0.52899	1.24392	1.3465	0.619823	0.390861	1.96219	1.55685	0.169931	1.63253	-0.0018888	0.736426
ORM1-ORM2--chr9--+	2	0.969867	1.64792	0.459524	0.767653	1.22459	0.694363	0.959886	1.14928	0.526479	0.141888	2	2	0.548391	-1.312	1.91115	0.758481	1.94443	2	1.98528	1.32445	0.873482	1.98595	1.61398	0.893319	0.864718	0.797782	0.508038	1.74738	1.81892	0.943965	1.75257	-1.312	0.482306	0.852122	1.57856	1.69692	0.844253	0.722232	1.40981	1.37025	0.453043	0.233238	1.77821	1.33228	-0.0226566	1.92116	0.657453	1.23896
PTMA--chr2--+	-0.947913	-1.0671	-0.39261	-0.26596	-1.18259	-1.09738	-0.0740993	-0.898966	-1.50292	-0.73284	-0.447102	-1.50292	-1.50292	-1.00408	-1.50292	-0.523319	-1.50292	-0.0402004	-0.776458	-0.0141358	-0.287401	-0.334086	-0.526522	-0.621997	-0.576497	-0.420198	-0.821814	-0.169282	0.0441839	-1.50292	-0.920686	-0.6411	-1.50292	-0.381411	-1.06495	-0.763255	-0.310274	-1.50292	-0.7452	-0.74301	-0.938956	0.129781	-0.745127	-1.50292	-0.55555	-1.50292	-1.50292	-0.685923	-1.50292
RPL10--chrX--+	0.0331753	-1.33621	-0.312271	0.318898	-0.947644	-0.579355	0.152359	-0.603656	-1.09266	-1.29202	0.10325	-0.301172	-1.63541	-0.231156	-2	0.114442	-0.637874	0.486586	-0.669949	-0.0153697	-0.0759239	0.270155	0.215005	-0.344793	-0.123473	-0.0468164	-0.742733	-1.02185	-0.944805	0.122897	-0.190218	0.37235	-1.85966	0.349686	-0.155597	-0.76404	0.408049	-1.39344	-0.620992	-0.733177	-0.226708	-0.534933	0.201603	0.0239163	-0.984868	-1.44323	0.103908	-0.426075	-2
RPL13--chr16--+	-0.329251	-0.544972	-0.347981	0.573932	-0.686584	-0.942482	0.856167	-0.605133	-0.741082	-0.822251	0.276743	-2	-1.02858	-0.399739	-2	-0.0758492	-2	0.576459	-0.242194	-0.324625	-0.712729	0.289668	-0.0805469	-0.330569	-0.154686	0.0721638	-0.731603	-0.719042	-0.760778	1.2091	-0.17502	1.04618	-1.72704	0.394739	-0.747129	-0.636487	0.540628	-0.941639	-0.259674	-0.604332	-0.363738	-0.327875	0.450046	-0.204006	-0.71851	-0.778071	-0.167045	-0.32328	-0.431055
RPL17--chr18---	-0.462908	-0.59086	-0.631794	0.356858	-0.452771	-0.653278	0.131596	-0.377479	-1.80776	-1.80776	0.959969	-1.80776	-1.80776	0.0961405	-1.80776	-0.770232	-1.80776	-0.258544	-1.03834	-0.519906	-0.120157	0.425322	-0.773625	-0.15083	-0.826555	0.164346	-0.248073	-0.395259	-1.80776	0.136982	-0.3115	-0.0954639	-1.80776	0.162827	-1.02546	-0.646432	-0.544589	-1.80776	-1.00523	-1.46481	-0.166025	-0.615605	0.51446	0.0404516	-0.80437	-1.80776	-1.80776	-0.362192	-0.520339
RPL28--chr19--+	-0.574225	-0.69859	0.12055	0.49506	-0.564372	-0.603548	0.295474	-0.732559	-0.923392	-0.652307	0.499383	0.0306449	-0.55423	0.160194	-1.88138	-0.381499	-1.88138	0.199496	-1.13353	-0.50765	-0.325061	-0.0195537	0.385698	-0.405871	-0.584451	-0.253158	-0.95559	-0.863025	0.296669	0.00884841	-0.427061	0.795894	-1.24672	0.388765	-0.53428	-0.692951	0.226971	-0.943138	-0.208235	-0.665856	-1.30081	0.275415	-0.0866759	-0.0849756	-1.07532	-1.88138	-0.793983	-0.590329	-1.88138
RPLP1--chr15--+	-0.110125	-0.97396	-0.215349	0.0745062	-0.866853	-0.726459	0.561718	-0.40105	-0.84482	-0.163098	0.584949	0.254307	-2	0.530183	-2	-0.0375911	-2	0.603789	-1.46242	-0.162073	-0.155308	0.13754	-0.0422314	-0.446279	-0.33526	-0.649976	-0.37468	-0.823424	-0.290726	0.0287091	-0.127915	0.0971948	-0.941401	0.302586	-0.850691	-0.967813	0.257806	-0.725569	-0.785131	-0.646941	-0.532714	0.487476	0.0727274	-2	-0.905022	-1.37503	-0.532838	-0.147588	-0.817268
RPS12--chr6--+	-0.378748	-0.934471	-0.397851	1.10172	-1.21603	-0.77306	0.898415	-0.129624	-0.978169	-0.449471	0.792646	-0.490341	-2	-0.118675	-2	0.630491	-0.48824	-0.316636	-0.100255	-0.178516	-0.690189	0.577008	0.0443972	-0.196281	0.0178351	-0.0337139	-0.442389	-0.776318	-0.21667	0.507228	0.13879	0.346081	-1.80443	0.81745	-0.34069	-0.928013	-0.288371	-1.30218	-0.594484	-0.590906	-0.0847709	-0.377345	0.4161	-0.609285	-1.17527	-2	-0.471031	0.237307	-0.482584
RPS18--chr6--+	-0.236398	-2	0.311213	0.137954	-0.693088	-0.697219	0.134082	-0.428083	-1.81114	-0.261216	0.412461	0.278592	-0.788065	0.117606	-2	-0.172412	-2	0.253554	-0.474411	-0.329012	-0.403577	0.474688	0.614416	-0.391597	-0.192552	-0.155481	-0.232373	-1.0481	-0.834007	0.255272	-0.0641716	-0.116271	-2	0.486643	-0.189137	-0.560387	-0.668909	-1.97857	-0.449683	-0.82705	-0.138774	-0.1686	0.540744	-0.296203	-1.43551	-2	-0.831144	-0.080332	-1.43116
RPS19--chr19--+	-0.637968	-0.532949	0.634141	0.664128	-0.627486	-0.603117	0.268349	-0.247469	-2	-0.7425	0.0465308	-0.777219	-2	0.268377	-0.629411	-0.0599289	-2	0.574945	-1.15294	-0.139451	-0.577956	-0.158534	0.673183	-0.70817	-0.00157343	-0.649781	-1.43331	-1.11604	-0.541606	0.576709	-0.288821	0.195262	-0.837508	0.556441	-0.420001	-0.889627	0.604225	-1.19617	-0.461103	-0.918828	-0.922428	0.141538	0.43794	-0.337815	-1.01446	-1.06366	-0.538667	-0.167332	-2
RPS27A--chr2--+	-0.578047	-0.999071	0.491005	0.456667	-0.241129	-0.450895	0.579181	-1.37632	-1.40892	-0.7583	0.501963	-0.62802	-2	-0.512202	-0.477646	-0.482728	-2	-2	-0.393722	0.0517178	-0.735672	0.365507	0.297968	-0.507529	-0.689251	-0.49837	-0.722908	-0.972726	-0.0474388	0.539331	-0.272209	0.664293	-2	0.506715	-0.638197	-0.860362	0.136448	-1.28491	0.0131029	-0.38105	-0.663174	-0.298648	0.255957	-0.729773	-0.740836	-2	-0.385326	-0.380694	-1.39288
RPS3--chr11--+	-0.801756	-0.116083	0.760948	-0.314434	-0.520736	-1.02884	-0.0156754	-0.906975	-0.775631	-1.27279	0.0635995	-0.366455	-1.75777	-0.102984	-1.75777	-1.75777	-1.75777	-1.75777	-0.557591	-0.696366	-0.359739	-0.0286829	0.111628	-0.919269	-0.589042	-0.318299	-0.80864	-1.28247	-0.645463	-0.385902	-0.761942	0.0783107	-1.75777	0.0904136	-0.736339	-0.80955	-1.75777	-1.02826	-1.16213	-1.16025	-0.958609	-1.00039	0.0821813	0.0839245	-1.40322	-1.75777	-0.642958	-0.117277	-1.13704
RPS8--chr1--+	-0.508182	-0.813013	-0.164365	0.200959	-0.863151	-0.687418	0.270956	-0.0120858	-1.20315	-0.29066	0.0953086	-1.77439	-1.77439	0.115119	-1.77439	0.426181	-1.77439	0.592561	-0.486377	-0.157021	-0.110439	0.62164	-0.325401	-0.0991912	-0.271112	-0.0754982	-0.700073	-0.60105	-1.77439	-1.77439	0.28471	-0.914983	-1.77439	0.178982	-0.335884	-1.0368	-1.77439	-1.77439	-0.0846951	-1.01661	-0.858674	0.314841	0.213757	-1.77439	-1.43939	-0.737207	-0.721055	0.0694799	-1.18788
SAA1--chr11--+	1.65801	2	2	2	1.09437	0.564008	0.620241	-0.0977439	2	0.67897	-0.0343952	2	0.929112	0.590123	-0.724841	0.292299	-0.724841	1.37397	0.876192	2	-0.114167	1.06852	1.99543	0.27224	2	1.51183	2	-0.724841	0.88155	2	2	2	-0.0847104	0.818675	0.280061	0.970797	1.66051	2	0.498215	0.888752	2	0.443887	-0.256478	0.543104	0.258832	-0.724841	0.371931	1.25896	2
TMSB10--chr2--+	-0.65204	-1.19859	-0.105195	-0.521447	-1.19859	-0.79923	-0.480509	-0.240055	-1.19859	-0.74607	-0.543757	-1.19859	-1.19859	-0.384515	-1.19859	-1.19859	-1.19859	-1.19859	-0.775441	-1.00279	-0.86577	-0.978126	-0.237068	-0.861775	-1.19859	-0.374823	-1.19859	-1.19859	-1.19859	0.6096	-1.19859	-0.682951	-1.19859	-0.677284	-1.19859	-0.890084	0.487052	-0.798869	-0.880845	-1.19859	-0.881106	-0.0901429	-0.591477	-1.19859	-0.622501	-1.19859	-1.19859	-0.595047	-0.261387
TMSB4X--chrX--+	-1.33164	-0.985198	-1.80167	-0.64348	-1.53039	-0.639642	-0.70457	-0.856569	-1.80167	-1.14949	-0.489505	-0.228706	-1.08637	-0.894427	-0.563655	-1.80167	-1.80167	-1.80167	-0.838599	-0.625622	-1.1353	-1.03019	-0.974764	-1.05562	-1.01709	-0.646582	-1.80167	-0.805183	-0.90911	0.0441644	-0.605245	-0.235888	-1.27955	-0.68284	-1.43075	-1.33612	-0.0671939	-1.21628	-0.713062	-1.15811	-0.804656	-1.19391	-1.1599	-0.767486	-1.13855	-0.920818	-0.9071	-1.10976	-1.30357
TTR--chr18--+	0.870893	-0.261291	2	0.768451	1.10359	0.962972	0.766678	0.847881	-0.233726	0.721821	1.34218	1.99182	-0.167683	0.436002	0.209111	1.68598	-2	1.82573	1.17264	1.16964	1.07661	1.10361	2	0.931895	1.79142	0.900723	1.58879	-0.398682	1.25154	2	0.840056	2	-1.22838	1.24505	0.940795	0.982242	2	-0.261835	0.838098	0.567263	0.376182	0.24489	0.730958	1.36556	0.421636	-0.666763	0.975146	0.866903	-0.0989168
[truncated: 398 more columns]
