# Supplementary material for: Long-read single-cell sequencing reveals expressions of hypermutation clusters of isoforms in human liver cancer cells
Source: eLife. 2024 Jan 11;12:RP87607. doi: 10.7554/eLife.87607 (PMC10945587; doi:10.7554/eLife.87607)
Supplement: Supplementary file 8. [file elife-87607-supp8.xlsx]

## Sheet: in
Supplemental table 8: Isoforms with SD>=0.5
Cell	N_AAAGGATGTGTACAGG	N_AACCTTTCAGAAGCGT	N_AACGTCACAGAGACTG	N_AAGACTCAGGGAGAAT	N_AAGCGTTAGGTGCGAT	N_AAGGTAATCACGGGCT	N_AATGGAAGTATAGGGC	N_AATGGCTTCCCGAACG	N_ACACTGAGTATTCCGA	N_ACACTGATCACTGGTA	N_ACCTACCAGCTGACTT	N_ACCTGTCCAAAGAGTT	N_ACGGAAGAGCAAACAT	N_ACGTACACATCAGCAT	N_ACGTACATCGCAACAT	N_ACGTAGTAGGCCCAAA	N_AGAAATGAGGGCGAGA	N_AGAACAATCGCGCTGA	N_AGACAAAGTATTGCCA	N_AGCGTCGCAGTTGGTT	N_AGGAGGTGTTAGCTAC	N_AGGCATTAGTAAGCAT	N_AGGGTCCCACGGCGTT	N_AGTCAACTCCTCTGCA	N_ATACCTTTCCGGGACT	N_ATAGAGATCAGTCAGT	N_ATCTTCAGTTCCCACT	N_ATGCCTCGTGTGTCGC	N_ATGCCTCTCATGCCAA	N_ATTCAGGTCGCTGTTC	N_CAACAGTCACCCTAAA	N_CAACAGTCACCTCGTT	N_CAACAGTTCGATGCTA	N_CAACGATTCCGGACGT	N_CAAGAGGCAATAGTCC	N_CAATTTCGTGGACTGA	N_CAATTTCTCATCCCGT	N_CACACAACACGAAGAC	N_CACGAATTCATCGCTC	N_CACTGTCCAGTCTTCC	N_CAGATACCAAGTAGTA	N_CAGATACGTTAGCTAC	N_CAGATACTCGGCTGAC	N_CAGATTGGTGAAGCGT	N_CAGGTATAGAGAGCAA	N_CATAAGCCACTTACAG	N_CATCCACAGATCACCT	N_CATGAGTCATTGGATC	N_CATTCATAGAACTCCT
Group	Normal	Normal	Normal	Normal	Normal	Normal	Normal	Normal	Normal	Normal	Normal	Normal	Normal	Normal	Normal	Normal	Normal	Normal	Normal	Normal	Normal	Normal	Normal	Normal	Normal	Normal	Normal	Normal	Normal	Normal	Normal	Normal	Normal	Normal	Normal	Normal	Normal	Normal	Normal	Normal	Normal	Normal	Normal	Normal	Normal	Normal	Normal	Normal	Normal
Cluster	A	A	A	A	A	A	A	A	A	A	A	A	A	A	A	A	A	A	A	A	A	A	A	A	A	A	A	A	A	A	A	A	A	A	A	A	A	A	A	A	A	A	A	A	A	A	A	A	A
A1BG--NM-130786--chr19---	0.613205	1.2537	1.21033	1.134	0.20757	-0.803301	1.43009	0.504305	1.78743	0.858763	1.85826	1.06865	-0.803301	0.820811	-0.803301	-0.803301	1.82321	-0.803301	2	1.49789	2	0.244025	-0.0748729	-0.803301	1.16865	-0.803301	1.75359	1.13187	0.9612	1.10049	1.56531	0.223418	1.53263	-0.803301	-0.803301	0.911764	1.35909	0.385332	-0.803301	-0.0832655	1.49562	1.30607	1.83114	-0.803301	0.758371	-0.803301	1.36393	-0.803301	-0.803301
A2M--NM-000014--chr12---	1.40308	0.500484	2	0.556652	0.545497	0.251034	1.86125	0.932344	0.513627	-0.713256	0.735808	1.57574	1.5589	1.16602	0.299255	-1.51382	-1.51382	-1.51382	-1.51382	0.782659	0.505069	1.24465	1.17721	0.507273	1.2323	0.728716	1.00316	0.828436	-0.132962	-1.51382	1.93279	0.307478	1.73545	0.247936	1.37005	0.489753	0.564297	0.171292	0.161924	0.557969	0.134858	1.035	-0.0308393	0.0452198	1.09628	0.937054	1.45025	-0.0283466	-0.0454105
ACAA2--NM-006111--chr18---	1.8092	0.483653	2	0.396244	1.30344	-0.627165	-0.627165	1.23326	0.908893	1.73758	-0.627165	1.04772	-0.627165	1.68358	-0.627165	-0.627165	-0.627165	-0.627165	2	-0.627165	0.660722	-0.627165	-0.627165	1.83895	2	-0.627165	1.0961	1.11516	-0.627165	2	-0.627165	1.33112	0.698709	-0.627165	-0.627165	-0.627165	-0.196402	1.73036	-0.627165	1.67667	0.194153	0.811633	0.813481	-0.627165	1.2829	-0.627165	0.863649	-0.627165	-0.627165
ACTA2--NM-001613--chr10---	-0.359057	-0.359057	-0.359057	-0.359057	-0.359057	-0.359057	-0.359057	-0.359057	-0.359057	-0.359057	-0.359057	-0.359057	-0.359057	-0.359057	-0.359057	-0.359057	-0.359057	-0.359057	-0.359057	-0.359057	-0.359057	-0.359057	-0.359057	-0.359057	-0.359057	-0.359057	-0.359057	-0.359057	-0.359057	-0.359057	-0.359057	-0.359057	-0.359057	-0.359057	-0.359057	-0.359057	0.0540779	-0.359057	-0.359057	-0.359057	-0.359057	-0.359057	-0.359057	1.37081	-0.359057	-0.359057	-0.359057	-0.359057	-0.359057
ACTB--NM-001101--chr7---	-0.460645	-1.40574	-1.40574	-0.925821	-1.40574	2	-0.917448	0.302333	0.204831	-0.723205	-0.486395	-0.156769	-1.40574	-1.40574	-1.40574	-1.40574	0.346675	-1.40574	-1.40574	-0.272996	-0.801795	-0.470581	-0.439497	0.317385	-0.456874	-1.40574	-0.263256	-0.588686	-0.505351	-1.40574	-1.40574	-1.01325	-0.0838796	-1.40574	-0.766634	-0.533225	-0.424443	0.947821	0.643054	-0.586888	-0.732132	-0.307641	-0.499008	-0.559918	-0.677455	-1.40574	-1.00417	-0.13927	-1.40574
ACTG1--NM-001614--chr17---	-0.173576	-0.839367	-0.839367	-0.0535677	-0.839367	2	-0.0398575	1.03409	0.340057	-0.839367	-0.839367	1.20563	-0.839367	-0.839367	-0.839367	2	-0.839367	-0.839367	-0.839367	-0.00428192	-0.449564	-0.182196	-0.0436015	-0.839367	0.528781	-0.0368168	0.136401	-0.839367	0.0376973	-0.839367	-0.839367	-0.839367	0.178673	-0.839367	-0.839367	0.589247	0.0179041	1.76488	-0.839367	-0.839367	-0.839367	-0.207575	0.266798	-0.839367	0.0324566	-0.839367	0.305318	-0.839367	-0.839367
ACTG1--NR-037688--chr17---	-0.0849901	-1.04636	-1.04636	0.0662595	-0.52183	1.86016	-1.04636	-1.04636	-1.04636	-1.04636	-1.04636	-1.04636	-1.04636	-1.04636	0.332451	-1.04636	-1.04636	-1.04636	-1.04636	-0.352749	-0.225015	-1.04636	-0.681429	0.526392	-0.272405	-1.04636	-0.589513	-1.04636	-0.317882	-1.04636	-1.04636	-0.114747	0.346211	-1.04636	-0.177198	-1.04636	-0.771643	0.529914	-1.04636	-1.04636	-0.522568	-0.521602	-0.520846	0.761287	-0.643002	-1.04636	-0.0955992	-1.04636	-1.04636
ADH1B--NM-000668--chr4---	1.27403	0.392647	2	1.55331	-0.689723	2	0.324875	-0.689723	2	-0.689723	0.450356	0.942266	-0.689723	-0.689723	-0.689723	-0.689723	1.76301	-0.689723	-0.689723	0.370022	1.38548	1.25339	1.57586	-0.689723	1.04649	1.59116	0.989405	1.55064	0.423294	-0.689723	-0.689723	0.733656	2	-0.689723	1.4887	1.12323	0.920448	1.49084	-0.689723	0.308489	0.110561	1.59195	0.714029	2	0.416644	-0.689723	0.144689	-0.689723	1.91157
ADH1C--NM-000669--chr4---	-0.605408	-0.605408	2	2	0.333653	-0.605408	1.41689	0.652318	-0.605408	-0.605408	0.730489	-0.605408	-0.605408	-0.605408	-0.605408	-0.605408	-0.605408	-0.605408	-0.605408	2	0.865037	-0.605408	1.74713	2	2	1.42361	0.845552	0.561323	-0.605408	2	-0.605408	-0.605408	0.908409	-0.605408	0.950643	0.652449	0.669347	1.14512	-0.605408	0.564255	0.332332	1.03734	1.60224	-0.605408	0.690987	-0.605408	2	-0.605408	-0.605408
ADH5--NM-000671--chr4---	-0.569068	-0.569068	-0.569068	2	-0.569068	-0.569068	0.633126	0.70276	0.453511	-0.569068	-0.569068	-0.569068	2	-0.569068	-0.569068	-0.569068	-0.569068	-0.569068	-0.569068	-0.569068	0.0170652	0.419097	0.0915895	2	1.17897	-0.569068	-0.569068	-0.569068	-0.569068	-0.569068	2	-0.569068	1.95199	-0.569068	-0.569068	1.57909	1.33882	0.326127	-0.569068	1.44697	0.379186	1.0921	-0.569068	1.51337	0.161157	2	0.419624	-0.569068	2
ADI1--NM-018269-1--chr2---	0.956023	-0.64578	-0.64578	-0.64578	-0.64578	-0.64578	-0.64578	1.33109	-0.64578	-0.64578	-0.64578	2	-0.64578	-0.64578	-0.64578	2	-0.64578	-0.64578	-0.64578	1.30922	0.722718	-0.64578	0.870434	-0.64578	1.2476	1.24257	0.115404	-0.64578	-0.64578	-0.64578	2	0.906442	1.67447	-0.64578	-0.64578	-0.64578	0.840805	0.178113	-0.64578	1.20968	-0.64578	0.228555	-0.64578	-0.64578	-0.64578	-0.64578	0.264162	-0.64578	-0.64578
ADIRF--NM-006829--chr10--+	-0.35106	-0.35106	2	-0.35106	-0.35106	-0.35106	-0.35106	-0.35106	-0.35106	-0.35106	0.641865	-0.35106	-0.35106	-0.35106	-0.35106	-0.35106	-0.35106	-0.35106	-0.35106	-0.35106	-0.35106	0.375264	-0.35106	-0.35106	-0.35106	-0.35106	-0.35106	-0.35106	-0.35106	-0.35106	-0.35106	0.359211	-0.35106	-0.35106	0.805498	-0.35106	-0.35106	-0.10802	-0.35106	-0.35106	0.345929	-0.35106	-0.35106	-0.35106	0.966881	-0.35106	0.375652	-0.35106	-0.35106
AGT--NM-000029--chr1---	1.28826	0.561296	0.812795	0.746003	0.706756	-0.949343	-0.308892	1.47454	0.79634	-0.949343	0.624095	1.1217	2	0.471927	0.769019	-0.949343	0.598908	2	1.37081	0.823262	0.628052	0.534532	-0.0716981	-0.949343	1.89265	1.21573	2	0.744139	0.231614	-0.949343	1.12344	1.37789	0.393713	0.0147441	2	0.839973	1.80723	1.18332	0.924534	-0.319236	1.21385	1.7051	0.708979	-0.949343	1.12448	2	0.75512	-0.949343	-0.949343
AGXT--NM-000030--chr2--+	1.63637	1.65093	2	1.86786	0.94018	0.654414	1.11304	0.494431	0.774966	0.557824	0.307198	-0.16428	-1.05832	1.54238	0.701211	-1.05832	1.69587	-1.05832	2	1.956	1.20325	0.988724	0.0415418	2	1.64306	1.74215	0.88355	0.616004	0.748811	0.387541	1.47366	1.17295	2	-0.22163	0.976112	1.43261	0.720947	0.529349	0.567935	0.796119	1.243	1.70068	1.49451	1.58882	1.22808	1.32017	0.868586	-1.05832	0.366724
AHNAK--NM-001620--chr11---	-0.49104	-0.49104	-0.49104	-0.49104	-0.49104	-0.49104	-0.49104	-0.49104	-0.49104	-0.49104	-0.49104	1.25855	-0.49104	-0.49104	-0.49104	-0.49104	-0.49104	-0.49104	-0.49104	-0.49104	-0.49104	-0.49104	-0.49104	-0.49104	-0.49104	-0.49104	-0.49104	-0.49104	-0.49104	-0.49104	-0.49104	-0.49104	-0.49104	-0.49104	-0.49104	-0.49104	-0.0410631	0.318906	-0.49104	-0.49104	-0.49104	-0.49104	0.369733	-0.49104	-0.49104	-0.49104	1.06627	-0.49104	-0.49104
AHSG--NM-001622--chr3--+	1.7673	1.49193	1.30325	1.59563	0.90796	0.973752	0.809588	1.21886	0.756771	0.293546	0.345208	1.60916	1.79328	0.713552	0.482754	0.185985	1.07917	-1.58091	1.84422	1.31393	1.42899	0.496278	0.680616	1.401	1.7737	0.450987	1.46878	0.619445	0.926506	1.5643	0.652927	1.29697	1.82716	-0.394931	1.77477	1.219	1.19663	0.763796	0.476589	-0.101174	1.31203	1.01171	1.5866	0.573422	0.99523	1.82801	0.781511	0.674069	1.37254
AIF1--NM-001623--chr6--+	-0.31217	-0.31217	-0.31217	-0.31217	-0.31217	-0.31217	-0.31217	-0.31217	-0.31217	-0.31217	-0.31217	1.16744	-0.31217	-0.31217	-0.31217	-0.31217	-0.31217	-0.31217	-0.31217	-0.31217	-0.31217	-0.31217	-0.31217	-0.31217	0.457622	-0.31217	-0.31217	-0.31217	-0.31217	-0.31217	-0.31217	-0.31217	-0.31217	-0.31217	0.891802	-0.31217	0.0683716	-0.31217	-0.31217	-0.31217	-0.31217	-0.31217	-0.31217	-0.31217	-0.31217	-0.31217	-0.31217	-0.31217	-0.31217
AKAP12--NM-144497--chr6--+	-0.259262	-0.259262	-0.259262	-0.259262	-0.259262	-0.259262	-0.259262	-0.259262	-0.259262	-0.259262	-0.259262	-0.259262	-0.259262	-0.259262	-0.259262	-0.259262	-0.259262	-0.259262	-0.259262	-0.259262	-0.259262	-0.259262	-0.259262	-0.259262	-0.259262	-0.259262	-0.259262	-0.259262	-0.259262	-0.259262	-0.259262	-0.259262	-0.259262	-0.259262	-0.259262	-0.259262	-0.259262	-0.0022386	-0.259262	-0.259262	-0.259262	-0.259262	-0.259262	-0.259262	-0.259262	-0.259262	-0.259262	-0.259262	-0.259262
AKR1C1--NM-001353--chr10--+	0.968619	1.34223	-0.567828	0.475267	0.270469	-0.567828	-0.567828	1.32839	-0.567828	0.915644	-0.567828	-0.567828	-0.567828	-0.567828	0.768005	-0.567828	-0.567828	-0.567828	2	-0.567828	0.378527	1.46471	-0.567828	-0.567828	-0.0847447	1.24347	2	0.473708	0.596415	-0.567828	-0.567828	-0.567828	2	-0.567828	0.821253	0.555056	0.858102	0.438906	2	-0.567828	-0.567828	-0.567828	0.900531	-0.567828	1.69682	-0.567828	2	-0.567828	-0.567828
AKR1C4--NM-001818--chr10--+	0.984976	1.36862	-0.592751	0.478369	2	-0.592751	-0.592751	-0.592751	1.55308	2	0.63184	-0.592751	-0.592751	1.82572	-0.592751	2	-0.592751	-0.592751	-0.592751	1.33287	2	0.303037	1.25345	-0.592751	1.27217	-0.592751	-0.592751	1.2308	0.602772	-0.592751	2	0.283238	2	-0.592751	1.74715	-0.592751	1.37733	-0.293006	2	0.479457	-0.592751	1.42858	-0.592751	1.29501	0.595629	-0.592751	2	-0.592751	-0.592751
ALB--NM-000477--chr4--+	1.2038	1.33713	1.64649	1.03518	1.31575	0.777554	1.38498	1.11217	1.39816	0.260537	0.867074	0.478237	1.31741	0.401455	0.431135	-0.465382	-0.127562	-0.267206	1.47858	1.16921	1.17323	1.2769	2	1.68577	1.88243	1.34596	1.58203	0.872242	0.603561	1.41393	1.65001	1.37087	1.90723	-0.396543	0.686039	1.16978	1.94314	1.12511	1.18055	0.291151	1.5078	1.12364	1.6301	0.552158	1.66842	1.53738	1.57558	-1.29398	1.45667
ALDH1A1--NM-000689--chr9---	0.155904	0.386402	-0.664215	0.30373	-0.664215	2	-0.664215	0.377662	-0.664215	-0.664215	0.442418	-0.664215	-0.664215	1.5213	0.575377	-0.664215	-0.664215	-0.664215	-0.664215	0.36444	0.850512	-0.664215	0.316006	2	0.159945	0.324364	0.0133098	-0.664215	0.41615	-0.664215	-0.664215	0.717407	-0.664215	0.81828	0.624789	-0.664215	1.1161	0.269989	-0.664215	0.987315	0.694375	0.114024	-0.664215	-0.664215	0.409694	-0.664215	0.145718	-0.664215	-0.664215
ALDH2--NM-001204889--chr12--+	0.974161	-0.590769	-0.590769	-0.590769	1.41345	-0.590769	0.4902	-0.590769	1.00386	-0.590769	2	-0.590769	-0.590769	-0.590769	-0.590769	-0.590769	-0.590769	-0.590769	-0.590769	-0.590769	0.37313	0.956159	0.485138	-0.590769	0.981001	-0.590769	1.1982	1.79615	1.40248	-0.590769	-0.590769	-0.590769	2	-0.590769	2	1.34077	1.7827	0.214158	-0.590769	-0.590769	1.83676	0.263439	0.904811	-0.590769	1.71586	-0.590769	1.91476	-0.590769	-0.590769
ALDOA--NM-184041--chr16--+	-0.457246	-0.457246	-0.457246	-0.457246	-0.457246	-0.457246	-0.457246	-0.457246	-0.457246	-0.457246	-0.457246	-0.457246	-0.457246	-0.457246	-0.457246	-0.457246	-0.457246	-0.457246	-0.457246	-0.457246	-0.457246	-0.457246	-0.457246	-0.457246	-0.457246	-0.457246	0.337742	-0.457246	-0.457246	-0.457246	-0.457246	-0.457246	1.01418	-0.457246	-0.457246	-0.457246	-0.457246	-0.139412	-0.457246	-0.457246	-0.457246	-0.457246	-0.457246	-0.457246	-0.457246	-0.457246	-0.457246	-0.457246	-0.457246
ALDOB--NM-000035--chr9---	1.33109	0.81779	1.71889	1.8541	1.41848	0.668701	0.901694	1.9493	1.47214	0.409341	1.52585	2	-1.37906	0.185766	0.589863	0.306718	1.49932	-1.37906	-1.37906	1.27624	0.524609	1.74575	1.75661	0.907691	1.52305	1.64073	1.18404	1.30526	1.01324	0.777006	0.752225	1.20504	1.87255	0.0600946	1.99113	1.04181	1.48194	0.821126	1.96934	0.43086	1.57996	1.38327	1.14236	0.676369	1.83971	0.0232843	0.747422	-0.165597	1.25401
AMBP--NM-001633--chr9---	1.49745	0.953939	1.72842	0.418977	1.34086	1.16814	0.630096	0.661226	1.0867	0.607926	0.788207	0.668889	2	0.917882	0.701867	-0.01366	1.79618	0.602026	2	1.36575	1.42923	0.708017	0.645387	2	1.02825	1.28597	0.685581	0.875414	0.0564983	1.54883	2	0.911307	1.89321	-0.0208771	0.810846	0.0100139	1.22635	1.542	1.42325	0.420305	0.91275	0.521538	1.2696	0.61346	0.679338	1.82326	0.708707	0.0961288	1.17278
ANG--NM-001097577--chr14--+	2	-0.77535	2	1.71361	0.772456	-0.77535	0.395801	-0.0469761	-0.189721	1.22657	0.520924	-0.77535	-0.77535	1.52743	0.0912462	1.70542	1.69555	-0.77535	-0.77535	1.13023	2	1.26275	0.587051	2	0.402825	0.772427	1.35681	0.744936	-0.0200694	-0.77535	2	0.793101	2	0.261059	-0.77535	-0.0469003	1.34598	0.342859	2	0.74797	2	1.38996	1.39199	1.0988	1.19083	1.28832	1.05697	-0.77535	0.989855
ANG--NM-001145--chr14--+	0.528399	-0.470243	-0.470243	0.708404	-0.470243	2	0.728968	0.79843	0.549799	1.20601	-0.470243	-0.470243	-0.470243	2	1.03918	-0.470243	-0.470243	-0.470243	2	-0.470243	1.013	-0.470243	0.188775	2	0.53332	2	1.95457	-0.470243	-0.470243	2	-0.470243	1.78508	2	-0.470243	-0.470243	-0.470243	0.815607	0.422731	-0.470243	-0.470243	1.75066	-0.470243	0.478769	-0.470243	-0.470243	-0.470243	0.515996	-0.470243	-0.470243
ANGPTL3--NM-014495--chr1--+	0.0893026	-0.689539	-0.689539	0.877474	1.41303	-0.689539	-0.689539	1.50203	1.534	2	1.60819	2	-0.689539	-0.689539	-0.689539	-0.689539	-0.689539	-0.689539	-0.689539	0.963012	0.74895	1.10164	1.61356	-0.689539	1.50692	1.41299	0.451914	0.875423	1.56538	-0.689539	-0.689539	1.44108	2	0.71834	1.89648	-0.689539	2	0.197645	2	0.230622	1.72646	0.0495304	0.604452	0.930525	1.30618	2	2	-0.689539	-0.689539
ANKRD12--NM-001083625--chr18--+	0.401468	-0.503955	-0.503955	1.31774	-0.503955	-0.503955	-0.503955	1.43867	-0.503955	-0.503955	-0.503955	-0.503955	-0.503955	-0.503955	-0.503955	-0.503955	-0.503955	-0.503955	-0.503955	0.631695	-0.503955	-0.503955	-0.503955	-0.503955	-0.503955	0.58745	-0.503955	-0.503955	-0.503955	-0.503955	-0.503955	-0.503955	-0.503955	1.13274	-0.503955	0.646412	-0.0541604	0.920759	-0.503955	-0.503955	-0.503955	-0.503955	-0.503955	1.37941	1.1177	-0.503955	1.05273	-0.503955	-0.503955
ANXA1--NM-000700--chr9--+	-0.578598	-0.578598	-0.578598	-0.578598	-0.578598	-0.578598	-0.578598	-0.578598	-0.578598	-0.578598	-0.578598	-0.578598	-0.578598	-0.578598	-0.578598	-0.578598	-0.578598	-0.578598	-0.578598	-0.578598	-0.578598	-0.578598	-0.578598	-0.578598	-0.578598	-0.578598	-0.578598	-0.578598	-0.578598	1.61101	-0.578598	-0.578598	-0.578598	-0.578598	-0.578598	-0.578598	-0.578598	-0.578598	-0.578598	-0.578598	-0.578598	-0.578598	-0.578598	-0.578598	-0.578598	-0.578598	-0.578598	-0.578598	-0.578598
ANXA2--NM-004039--chr15---	-0.561663	-0.561663	2	-0.561663	-0.561663	-0.561663	-0.561663	-0.561663	-0.561663	-0.561663	-0.561663	-0.561663	-0.561663	-0.561663	-0.561663	-0.561663	-0.561663	-0.561663	-0.561663	-0.561663	-0.561663	-0.561663	0.0042666	-0.561663	-0.0929072	-0.561663	0.14681	-0.561663	0.568051	-0.561663	-0.561663	-0.561663	-0.561663	-0.561663	-0.561663	-0.561663	-0.561663	0.954681	-0.561663	-0.561663	0.858984	-0.561663	0.253298	2	-0.561663	-0.561663	-0.561663	-0.561663	-0.561663
ANXA4--NM-001153--chr2--+	0.0297278	-0.663653	-0.663653	-0.663653	-0.00596579	2	0.168988	-0.663653	-0.663653	0.500208	-0.663653	-0.663653	-0.663653	-0.663653	-0.663653	-0.663653	-0.663653	-0.663653	-0.663653	-0.663653	-0.663653	-0.663653	-0.206081	1.30836	-0.663653	-0.663653	-0.0908304	-0.663653	0.249756	-0.663653	-0.663653	-0.663653	0.396574	-0.663653	-0.663653	-0.663653	-0.0260363	1.9217	-0.663653	-0.663653	-0.0068911	-0.663653	-0.663653	-0.663653	-0.663653	-0.663653	0.528467	-0.663653	-0.663653
ANXA5--NM-001154--chr4---	-0.584271	-0.584271	-0.584271	-0.584271	-0.584271	-0.584271	-0.584271	-0.584271	-0.584271	-0.584271	-0.584271	-0.584271	-0.584271	-0.584271	-0.584271	-0.584271	-0.584271	-0.584271	-0.584271	0.50612	-0.584271	0.273813	-0.0105817	1.88817	-0.584271	0.463638	0.133916	0.440233	-0.584271	-0.584271	-0.584271	-0.584271	0.745009	-0.584271	-0.584271	-0.584271	-0.584271	0.193082	-0.584271	-0.584271	-0.584271	-0.584271	-0.584271	-0.584271	-0.584271	-0.584271	0.274271	-0.584271	-0.584271
AP2S1--NM-004069--chr19---	-0.544692	-0.544692	-0.544692	-0.544692	-0.544692	-0.544692	0.520926	0.582649	-0.544692	-0.544692	-0.544692	1.16936	-0.544692	-0.544692	-0.544692	-0.544692	2	-0.544692	2	-0.544692	1.09429	-0.544692	0.515936	-0.544692	-0.0596406	0.524979	0.188409	1.23839	-0.544692	2	2	-0.544692	2	-0.544692	-0.544692	-0.544692	0.271333	1.61684	-0.544692	-0.544692	-0.544692	-0.544692	-0.544692	-0.544692	-0.544692	-0.544692	-0.544692	-0.544692	-0.544692
APCS--NM-001639--chr1--+	1.34612	0.876227	2	1.7584	0.218259	1.0625	0.112973	0.1719	-0.0423749	0.942961	-1.05708	-1.05708	2	0.469374	0.371119	-1.05708	-1.05708	-1.05708	1.43478	1.10574	1.09345	0.260255	1.70267	1.37023	1.27284	0.489245	-0.217587	1.42721	-0.302506	0.73223	-1.05708	1.29379	2	-0.0216427	-0.156784	-0.329312	0.883401	1.23341	2	0.464811	-0.108183	0.722133	0.491476	1.96482	-0.0311599	2	1.47703	-1.05708	-1.05708
APOA1--NM-000039--chr11---	1.53978	0.90234	2	0.283092	0.51993	-0.0992233	1.00146	0.79843	1.0683	1.18861	0.220631	1.29994	2	0.2874	0.51731	0.614931	2	0.527907	1.97262	1.38583	1.65015	1.28212	1.08574	2	1.52816	1.4415	1.14975	1.21211	0.198887	1.68634	2	0.433279	2	0.387937	0.46565	0.570297	2	0.774304	2	0.86519	0.769783	0.84171	0.968856	0.536064	0.566379	1.95979	1.34528	0.173101	1.44104
APOA2--NM-001643--chr1---	0.913398	0.0782935	2	1.98778	0.525814	-0.263529	0.459668	1.34397	0.657455	0.425279	0.389471	1.96428	1.35291	-0.0043078	0.518761	-0.358583	1.88867	-2	1.96129	0.997548	1.17788	0.886495	1.05119	2	1.09763	0.997407	1.57857	0.831113	-0.126452	1.78652	2	0.795786	2	-1.37662	1.92079	0.664897	0.902116	0.554889	2	-0.140707	0.70397	0.804706	0.350191	0.688996	0.783504	1.34242	0.687135	-0.269963	1.48859
APOB--NM-000384--chr2---	1.25688	0.483204	0.578504	1.29699	0.737821	0.113002	1.32006	1.39607	1.04453	1.40505	1.71485	1.17019	-1.46527	0.637021	0.361378	0.380218	1.0727	-1.46527	0.390212	1.3124	1.10453	1.18476	1.62353	1.03813	1.59372	0.861522	1.88593	0.0776076	0.368846	-0.132919	-1.46527	1.65824	1.07565	0.589806	1.39819	1.02045	1.55678	0.983731	0.683749	1.67996	1.7404	1.55876	0.954497	-0.0710531	0.760569	0.0699337	2	-1.46527	-0.152102
APOC1--NM-001645--chr19--+	0.892185	0.193952	2	1.96064	0.784537	0.0931377	0.669177	1.62166	0.867429	-0.0761152	0.25314	1.8588	1.1059	0.434274	0.619669	-0.831698	1.57419	-2	1.23364	0.744062	0.953728	0.982398	1.89392	1.75218	1.30628	1.22666	1.24029	0.887506	0.385753	1.465	2	1.37841	2	-0.837113	1.65709	0.782996	1.01047	0.944879	1.52231	-0.19548	1.08101	0.909404	1.15559	0.693163	1.45731	0.898327	0.449399	0.192919	1.09341
APOC1P1--NR-028413--chr19--+	1.44724	0.185576	-0.646134	2	0.43073	-0.646134	1.44404	2	0.0170168	0.443633	0.22992	2	2	-0.646134	-0.646134	-0.646134	2	-0.646134	-0.646134	1.51169	1.11843	0.469564	2	-0.646134	0.868867	-0.646134	1.178	0.658411	1.23356	-0.646134	-0.646134	2	2	-0.646134	2	-0.646134	1.8496	0.0934184	2	-0.646134	0.797723	-0.0300494	1.37257	-0.646134	2	-0.646134	-0.00495921	-0.646134	-0.646134
APOC2--NM-000483--chr19--+	0.896787	0.230445	2	1.80031	0.874534	-0.306718	0.682257	1.83067	0.312478	1.02782	0.184092	1.76272	1.78691	-0.189884	0.602069	-1.67457	1.81532	0.429956	1.89939	1.30934	1.26154	0.276319	1.06513	1.78233	1.32421	1.07527	1.41423	0.823228	-0.0849832	1.79074	2	0.439295	2	-1.00636	1.48526	0.805416	1.25855	1.00817	1.36921	0.0426577	0.67031	0.758156	0.759762	0.439537	1.04498	1.41128	0.882573	0.0131745	1.68576
APOC3--NM-000040--chr11--+	1.14789	0.539462	2	1.95604	1.05053	-0.658938	0.829906	1.31401	1.05965	0.7125	0.986997	1.83712	1.48989	0.211161	0.445897	0.319857	2	-0.0686033	1.77659	1.5746	1.19151	1.24157	1.01781	1.75713	1.29325	1.33228	1.46204	0.769235	0.430081	0.886725	2	1.30529	2	-0.200361	1.72617	1.00157	1.60447	0.924079	1.45107	0.325763	1.17133	1.1415	0.977375	0.323185	1.11773	1.65179	0.485793	-0.402592	1.6018
APOC4--NM-001646--chr19--+	2	1.20231	1.99655	2	2	-0.690047	0.818979	0.887619	1.69333	0.251059	0.0664999	1.48716	2	-0.690047	0.707902	1.7359	1.72624	-0.690047	-0.690047	1.17342	0.968202	1.1011	0.967909	2	1.95099	1.12003	1.39499	2	0.048542	-0.690047	2	0.576173	2	0.323457	0.191178	0.513011	0.9044	0.19219	2	0.439018	0.821936	1.25049	1.05328	-0.690047	1.08653	2	0.599943	-0.690047	1.03615
APOE--NM-001302689--chr19--+	0.688319	1.53072	-0.650369	1.7974	1.0641	2	0.274324	-0.650369	0.136169	-0.650369	0.388686	0.837006	2	2	0.513526	-0.650369	2	-0.650369	-0.650369	0.983502	0.174179	1.12056	0.616789	2	0.931997	0.277841	2	-0.650369	1.05472	-0.650369	2	0.0928998	2	1.58603	1.90641	-0.650369	1.53947	1.2253	2	1.39555	1.73832	1.42912	0.0813993	-0.650369	0.728801	2	1.12133	1.74797	-0.650369
APOH--NM-000042--chr17---	1.39471	0.776508	1.61447	0.726614	0.756045	0.121402	0.981431	0.764678	1.11509	1.10653	0.257859	0.782255	1.45297	-0.427505	0.521223	-0.290031	0.117306	1.58022	1.24347	0.811932	1.27543	0.987388	0.42145	2	1.07284	1.66384	1.13146	0.844917	0.112794	1.74318	2	0.515804	2	-0.919993	1.26728	0.892352	1.56119	1.11216	2	0.445969	0.971693	0.891624	0.893577	0.77982	0.58754	2	1.14382	-0.184248	1.60001
APOM--NM-019101--chr6--+	1.4796	0.776472	2	0.677783	-0.0255467	-0.652862	-0.652862	1.86624	-0.652862	1.65639	0.239549	-0.652862	2	-0.652862	0.996137	-0.652862	-0.652862	2	-0.652862	0.750418	1.44939	0.483668	0.137608	2	0.50192	1.13252	-0.106492	-0.652862	-0.652862	2	1.91749	-0.652862	2	-0.652862	-0.652862	-0.652862	1.09093	0.857034	2	-0.652862	-0.0264293	1.13315	-0.652862	0.722831	0.531664	1.72762	0.00028428	-0.652862	2
APRT--NM-000485--chr16---	0.107747	0.327991	-0.675887	0.248997	0.623893	-0.675887	-0.675887	-0.675887	1.56133	-0.675887	-0.675887	-0.675887	2	-0.675887	0.508559	-0.675887	-0.675887	-0.675887	-0.675887	0.986833	0.771453	0.670766	-0.158756	1.55281	0.111608	-0.675887	-0.675887	0.247614	-0.675887	-0.675887	-0.675887	1.788	2	-0.675887	0.555773	-0.675887	-0.675887	1.5578	2	-0.675887	0.0663615	0.624396	-0.675887	-0.675887	1.33211	-0.675887	-0.675887	-0.675887	-0.675887
AREG--NM-001657--chr4--+	-0.307581	-0.307581	-0.307581	-0.307581	-0.307581	-0.307581	-0.307581	-0.307581	-0.307581	-0.307581	-0.307581	-0.307581	-0.307581	-0.307581	-0.307581	-0.307581	-0.307581	-0.307581	-0.307581	-0.307581	-0.307581	-0.307581	-0.307581	-0.307581	-0.307581	-0.307581	-0.307581	-0.307581	-0.307581	-0.307581	-0.307581	-0.307581	-0.307581	-0.307581	-0.307581	-0.307581	-0.307581	-0.0949315	-0.307581	-0.307581	-0.307581	-0.307581	-0.307581	-0.307581	-0.307581	-0.307581	-0.307581	-0.307581	-0.307581
ARG1--NM-000045--chr6--+	0.266364	0.509413	2	1.1415	1.32699	-0.598413	2	0.500197	2	-0.598413	-0.598413	-0.598413	-0.598413	1.70611	-0.598413	-0.598413	-0.598413	-0.598413	-0.598413	0.486255	0.327581	-0.598413	1.1608	-0.598413	0.611897	-0.598413	2	1.69464	0.540781	2	-0.598413	0.858442	2	-0.598413	1.63124	0.500312	0.515072	0.930656	-0.598413	0.423276	0.220693	1.32768	1.32994	1.2004	2	2	0.255623	-0.598413	2
ARGLU1--NM-018011--chr13---	-0.558991	-0.558991	-0.558991	-0.558991	-0.558991	-0.558991	-0.558991	-0.558991	0.13176	-0.558991	-0.558991	-0.558991	-0.558991	-0.558991	-0.558991	-0.558991	-0.558991	-0.558991	-0.558991	-0.558991	-0.558991	-0.558991	-0.112717	-0.558991	-0.558991	-0.558991	-0.558991	-0.558991	-0.558991	-0.558991	-0.558991	-0.558991	-0.558991	-0.558991	-0.558991	-0.558991	-0.558991	-0.135528	-0.558991	-0.558991	0.0815542	-0.558991	-0.558991	-0.558991	-0.558991	-0.558991	-0.558991	-0.558991	-0.558991
ARHGDIB--NM-001175--chr12---	-0.479683	-0.479683	-0.479683	-0.479683	-0.479683	-0.479683	-0.479683	-0.479683	-0.479683	-0.479683	-0.479683	-0.479683	-0.479683	-0.479683	0.826738	-0.479683	-0.479683	-0.479683	-0.479683	-0.479683	-0.479683	-0.479683	-0.479683	-0.479683	-0.479683	-0.479683	-0.479683	-0.479683	-0.479683	-0.479683	-0.479683	-0.479683	-0.479683	-0.479683	-0.479683	-0.479683	-0.479683	-0.479683	2	-0.479683	-0.479683	-0.479683	-0.479683	-0.479683	-0.479683	-0.479683	-0.479683	-0.479683	-0.479683
ARL6IP1--NM-015161--chr16---	0.476161	-0.524336	-0.524336	0.6565	0.424658	2	1.51935	-0.524336	0.4976	1.15503	-0.524336	-0.524336	-0.524336	-0.524336	-0.524336	-0.524336	-0.524336	-0.524336	-0.524336	0.730563	0.546986	-0.524336	-0.524336	2	0.0225385	-0.524336	-0.524336	1.48601	-0.524336	-0.524336	-0.524336	-0.524336	-0.524336	-0.524336	-0.524336	-0.524336	0.395698	0.615338	-0.524336	0.657699	-0.524336	-0.524336	-0.524336	1.55679	-0.524336	-0.524336	0.463735	-0.524336	-0.524336
ARPC1B--NM-005720--chr7--+	0.257869	-0.584433	-0.584433	-0.584433	-0.584433	-0.584433	-0.584433	1.22276	-0.584433	-0.584433	-0.584433	-0.584433	-0.584433	-0.584433	-0.584433	-0.584433	-0.584433	-0.584433	-0.584433	-0.584433	-0.584433	-0.584433	-0.584433	-0.584433	-0.124029	-0.584433	-0.584433	-0.584433	-0.584433	-0.584433	-0.584433	-0.584433	-0.584433	-0.584433	-0.584433	-0.584433	-0.584433	-0.306234	-0.584433	-0.584433	0.213385	-0.584433	-0.584433	-0.584433	0.0299453	-0.584433	-0.584433	-0.584433	-0.584433
ARPC2--NM-152862--chr2--+	-0.571028	-0.571028	-0.571028	-0.571028	-0.571028	2	-0.571028	-0.571028	-0.571028	-0.571028	-0.571028	-0.571028	-0.571028	-0.571028	1.42769	-0.571028	-0.571028	-0.571028	-0.571028	-0.571028	-0.1017	-0.571028	-0.042027	1.70882	-0.571028	0.395253	-0.571028	-0.571028	-0.571028	-0.571028	-0.571028	-0.571028	0.654705	-0.571028	-0.571028	-0.571028	-0.1728	0.342104	-0.571028	-0.571028	-0.571028	0.189657	-0.571028	-0.571028	0.0136774	-0.571028	-0.571028	-0.571028	-0.571028
ARPC3--NM-001278556--chr12---	1.2083	0.386435	1.98021	-0.622847	-0.622847	-0.622847	-0.622847	-0.622847	-0.622847	-0.622847	-0.622847	-0.622847	-0.622847	-0.622847	0.567975	-0.622847	-0.622847	-0.622847	-0.622847	-0.622847	-0.622847	-0.622847	-0.102932	-0.622847	-0.192205	-0.622847	0.0280213	-0.622847	-0.622847	-0.622847	-0.622847	-0.622847	0.581833	0.80132	-0.622847	-0.622847	-0.622847	0.0816415	-0.622847	0.963705	-0.622847	-0.622847	-0.622847	1.01596	-0.622847	-0.622847	-0.622847	-0.622847	-0.622847
ARPC3--NM-001287222--chr12---	-0.486009	-0.486009	-0.486009	-0.486009	-0.486009	-0.486009	-0.486009	0.65195	-0.486009	-0.486009	-0.486009	-0.486009	-0.486009	-0.486009	0.867898	-0.486009	-0.486009	-0.486009	-0.486009	-0.486009	-0.486009	0.398144	-0.486009	-0.486009	-0.486009	-0.486009	0.253997	-0.486009	-0.486009	-0.486009	-0.486009	-0.486009	1.76969	-0.486009	0.921867	-0.486009	-0.486009	-0.190157	-0.486009	-0.486009	-0.486009	-0.486009	-0.486009	-0.486009	-0.486009	-0.486009	-0.486009	-0.486009	-0.486009
ARPC5--NM-005717--chr1---	0.184335	0.402132	-0.590594	-0.590594	-0.590594	-0.590594	-0.590594	-0.590594	-0.590594	-0.590594	-0.590594	0.906229	-0.590594	-0.590594	0.580694	-0.590594	-0.590594	-0.590594	-0.590594	-0.590594	0.560377	-0.590594	-0.590594	-0.590594	-0.167016	-0.590594	-0.590594	-0.590594	-0.590594	-0.590594	-0.590594	0.157396	-0.590594	-0.590594	-0.590594	-0.590594	-0.590594	1.17858	-0.590594	0.324944	-0.590594	-0.590594	-0.590594	-0.590594	-0.590594	-0.590594	0.17471	-0.590594	-0.590594
ASGR1--NM-001197216--chr17---	1.14505	0.698372	-0.552616	0.599933	0.373645	-0.552616	-0.552616	1.54257	-0.552616	2	-0.552616	-0.552616	-0.552616	-0.552616	0.923389	-0.552616	-0.552616	-0.552616	2	1.51939	1.56433	0.411271	1.76785	2	1.15247	0.624502	1.81851	0.598211	0.733794	-0.552616	-0.552616	0.389967	-0.552616	-0.552616	0.982224	-0.552616	1.56724	1.17405	-0.552616	-0.552616	0.372341	2	0.375383	1.47866	-0.552616	-0.552616	0.411785	-0.552616	-0.552616
ASGR1--NM-001671--chr17---	1.61977	0.668399	2	-0.499913	1.53062	-0.499913	-0.499913	-0.499913	0.431622	-0.499913	0.730689	-0.499913	-0.499913	-0.499913	0.878544	-0.499913	2	-0.499913	-0.499913	0.643976	2	-0.499913	-0.499913	2	1.62823	1.36918	0.836683	0.574857	-0.499913	2	-0.499913	0.380376	2	-0.499913	-0.499913	-0.499913	0.338734	1.11264	2	-0.499913	0.363915	-0.499913	-0.499913	-0.499913	-0.499913	2	0.400752	-0.499913	-0.499913
ASGR2--NM-080914--chr17---	0.27712	1.29116	2	-0.596151	2	-0.596151	0.452509	0.51325	0.295833	-0.596151	-0.596151	2	2	-0.596151	0.72378	-0.596151	-0.596151	-0.596151	-0.596151	0.499171	0.338938	0.904541	1.18034	1.88748	0.928641	-0.596151	1.52425	1.15855	1.93217	-0.596151	-0.596151	0.246763	-0.596151	-0.596151	0.776394	0.513366	0.812804	1.77812	-0.596151	0.435573	0.231	0.232525	1.7647	-0.596151	0.0408162	2	1.41306	-0.596151	-0.596151
ASS1--NM-054012--chr9--+	0.792414	1.14657	-0.664049	0.324745	0.130608	2	1.59081	0.40027	1.72776	0.742197	1.2301	-0.664049	-0.664049	-0.664049	0.602244	-0.664049	-0.664049	-0.664049	-0.664049	0.386763	-0.173548	1.26268	1.58243	-0.664049	1.05753	2	1.68984	1.55743	-0.664049	2	-0.664049	1.228	1.44568	0.850378	-0.664049	-0.664049	1.35774	0.479194	-0.664049	0.325749	2	0.130953	0.72787	-0.664049	-0.0529659	2	0.163329	-0.664049	-0.664049
ATF4--NM-182810--chr22--+	-0.549098	-0.549098	-0.549098	2	-0.549098	-0.549098	0.607814	-0.549098	-0.549098	-0.549098	-0.549098	-0.549098	2	-0.549098	0.907088	-0.549098	-0.549098	-0.549098	-0.549098	-0.549098	-0.549098	-0.549098	0.086675	-0.549098	-0.549098	-0.549098	-0.549098	-0.549098	-0.549098	-0.549098	-0.549098	0.380829	-0.549098	2	0.965133	-0.549098	0.336838	0.765586	-0.549098	-0.549098	-0.549098	-0.549098	-0.549098	2	0.153623	-0.549098	-0.549098	-0.549098	-0.549098
ATF5--NM-001290746--chr19--+	2	2	-0.579187	2	0.693648	-0.579187	1.89137	1.06728	-0.579187	-0.579187	2	0.903074	-0.579187	-0.579187	-0.579187	2	-0.579187	-0.579187	-0.579187	0.383331	0.242525	-0.579187	2	-0.579187	1.40622	0.345831	0.945888	-0.579187	2	-0.579187	-0.579187	2	0.594204	-0.579187	1.9688	2	0.658937	0.628326	-0.579187	0.966157	1.49025	0.694141	2	1.01706	2	-0.579187	-0.579187	-0.579187	-0.579187
ATOX1--NM-004045--chr5---	-0.688985	-0.688985	1.81117	2	0.995806	-0.688985	-0.688985	2	2	-0.688985	0.332082	1.63527	-0.688985	1.32754	-0.688985	-0.688985	2	-0.688985	2	0.260133	0.951419	0.611394	1.10913	-0.688985	0.865987	0.223156	-0.688985	-0.688985	1.50185	-0.688985	-0.688985	1.38108	1.77091	-0.688985	-0.688985	-0.688985	0.753101	0.916392	1.96971	-0.688985	1.65836	0.566617	0.030115	1.78455	0.666309	2	-0.688985	-0.688985	1.64076
ATP5B--NM-001686--chr12---	0.180813	0.42017	-0.670825	0.334321	0.136973	-0.670825	-0.670825	-0.670825	0.837822	-0.670825	0.478338	-0.670825	-0.670825	-0.670825	0.616408	-0.670825	-0.670825	2	2	2	-0.172213	0.169787	0.347069	-0.670825	0.816195	0.355747	1.02168	0.332819	0.451061	-0.670825	-0.670825	0.763896	1.47379	-0.670825	0.667719	0.411207	-0.247749	0.835013	-0.670825	-0.670825	-0.670825	0.742297	1.22823	2	0.854496	-0.670825	-0.670825	1.98166	1.95119
ATP5E--NM-006886--chr20---	0.700914	-0.412633	1.59906	1.66983	-0.60318	-1.1467	-0.458596	-0.41874	-0.131619	-1.1467	0.148839	-1.1467	-1.1467	-1.1467	-0.280596	-1.1467	1.3228	-1.1467	-1.1467	0.0691335	0.0955001	-0.161985	1.26645	-1.1467	0.814516	-0.455979	-0.00790975	-0.471407	-1.1467	-1.1467	1.08031	-0.18136	2	-1.1467	1.37193	-0.418664	-0.054677	0.249069	1.74045	0.375757	0.630829	-0.602944	0.402432	0.726391	0.321613	-1.1467	-1.1467	-1.1467	0.617504
ATP5G1--NM-001002027--chr17--+	-0.632677	0.470186	2	1.09944	0.183908	2	-0.632677	-0.632677	0.892381	-0.632677	1.31374	1.03021	-0.632677	-0.632677	-0.632677	2	-0.632677	-0.632677	-0.632677	-0.632677	1.23361	0.21708	0.39629	2	0.572211	0.405063	0.0785404	0.381884	0.501413	-0.632677	-0.632677	1.72243	2	-0.632677	1.58699	-0.632677	0.47582	1.04637	2	-0.632677	0.18276	0.184263	0.185441	-0.632677	-0.00473093	-0.632677	0.217533	-0.632677	2
ATP5G2--NM-005176--chr12---	0.328798	-0.997268	-0.997268	0.816344	-0.456098	-0.997268	-0.31214	-0.272456	0.35175	-0.997268	0.292668	0.755165	1.20154	-0.997268	0.425282	-0.997268	-0.997268	-0.997268	1.48474	-0.281654	-0.38634	-0.0168113	-0.0583996	0.625375	-0.423917	0.542941	0.797671	-0.997268	-0.997268	1.61396	-0.997268	-0.446562	1.18952	-0.997268	-0.100535	-0.997268	-0.262642	0.898786	-0.997268	-0.997268	-0.997268	-0.455863	-0.455083	0.189509	0.259513	-0.997268	-0.997268	-0.997268	-0.997268
ATP5G3--NM-001689--chr2---	0.559818	0.886395	1.18942	-0.933739	-0.933739	1.44411	0.378887	0.444995	0.900845	0.14489	-0.0666388	-0.933739	1.5428	0.778717	1.13668	1.84671	0.931713	2	-0.933739	0.42974	-0.245647	0.170556	0.123715	0.893856	0.188291	-0.15914	0.343341	-0.933739	-0.933739	2	1.56371	0.148829	2	-0.933739	1.57776	-0.933739	0.290895	1.05618	-0.933739	-0.933739	-0.325073	-0.323951	0.499192	-0.933739	-0.465022	-0.933739	0.171079	-0.933739	1.0447
ATP5H--NM-006356--chr17---	-0.630842	-0.630842	-0.630842	1.1141	0.807673	2	-0.630842	0.470945	-0.630842	-0.630842	-0.630842	-0.630842	-0.630842	1.68034	-0.630842	-0.630842	2	-0.630842	-0.630842	0.456962	0.970984	0.225207	0.405744	-0.630842	0.240709	0.414581	0.64022	-0.630842	-0.630842	-0.630842	-0.630842	0.206286	2	-0.630842	-0.630842	0.471059	0.166685	1.72713	-0.630842	-0.630842	0.190632	0.192147	0.193333	-0.630842	0.504819	-0.630842	0.225663	-0.630842	-0.630842
ATP5I--NM-007100--chr4---	1.13033	0.693491	-0.529926	2	0.37592	-0.529926	-0.529926	-0.529926	-0.529926	-0.529926	0.758719	1.31473	-0.529926	2	-0.529926	-0.529926	-0.529926	-0.529926	-0.529926	-0.529926	0.0292057	1.11123	0.100297	-0.529926	-0.00791651	-0.529926	0.259034	-0.529926	-0.529926	-0.529926	-0.529926	1.62686	-0.529926	-0.529926	-0.529926	0.683439	0.348276	0.972811	2	0.598365	-0.529926	-0.529926	-0.529926	-0.529926	1.18053	-0.529926	1.11201	-0.529926	-0.529926
ATP5J--NM-001003703--chr21---	0.888596	-0.0796957	1.20167	2	0.81884	-0.891134	0.402723	0.891218	0.230936	-0.891134	0.540955	1.56854	-0.891134	0.796835	1.14968	-0.891134	0.947644	-0.891134	2	0.452849	0.830426	0.197371	0.61401	1.79302	1.03157	1.15378	1.29213	0.381614	-0.0567202	-0.891134	2	0.175954	2	-0.891134	1.21201	-0.0863623	0.315989	1.14353	1.33437	-0.891134	0.517531	-0.891134	-0.289199	0.426428	1.70135	-0.891134	0.566219	-0.891134	1.97361
ATP5J2--NM-001003713--chr7---	1.05104	-0.595315	-0.595315	1.31006	1.96126	-0.595315	-0.595315	0.60777	-0.595315	-0.595315	-0.595315	-0.595315	-0.595315	-0.595315	-0.595315	-0.595315	-0.595315	-0.595315	-0.595315	1.41407	0.811249	0.339439	0.963074	2	0.356366	0.546225	0.187042	-0.595315	-0.595315	2	2	1.00008	2	-0.595315	0.893136	-0.595315	-0.124858	0.894845	2	-0.595315	0.973488	0.30334	0.978084	-0.595315	0.0954415	-0.595315	-0.595315	-0.595315	2
ATP5L--NM-006476--chr11--+	-0.168143	-1.143	0.709737	1.75275	0.10551	0.931991	-1.143	0.4349	0.457917	-1.143	-1.143	-0.0598658	-1.143	-1.143	-0.295431	-1.143	0.484853	-1.143	2	-0.439659	0.63946	-0.179357	-0.472776	1.75548	0.307803	-0.467061	-0.0285797	-1.143	-1.143	0.608671	-1.143	1.15842	0.269108	-0.129346	0.302798	-0.430544	-0.0743462	1.14676	0.827221	-1.143	0.104077	-0.21254	-0.610114	1.15874	0.293892	0.875368	0.147181	-1.143	-1.143
ATP5O--NM-001697--chr21---	1.04229	0.917448	-0.737491	-0.737491	-0.737491	-0.737491	0.182053	0.235315	-0.737491	-0.737491	0.295778	-0.737491	-0.737491	-0.737491	0.419923	-0.737491	-0.737491	-0.737491	-0.737491	0.222969	0.399846	0.0183444	-0.737491	-0.737491	0.334224	-0.737491	-0.104883	-0.737491	-0.737491	1.65453	2	0.00163878	-0.737491	-0.737491	-0.737491	-0.737491	0.248486	1.01073	-0.737491	0.167202	-0.0121826	0.968037	-0.737491	0.85534	1.22468	2	-0.737491	-0.737491	-0.737491
ATP6V0E1--NM-003945--chr5--+	-0.621948	-0.621948	-0.621948	0.348795	-0.621948	-0.621948	-0.621948	1.69244	-0.621948	-0.621948	-0.621948	0.966742	-0.621948	-0.621948	-0.621948	-0.621948	-0.621948	-0.621948	-0.621948	-0.621948	0.258765	-0.621948	-0.0791753	-0.621948	-0.172373	1.59842	-0.621948	0.347344	0.46154	-0.621948	-0.621948	0.17195	-0.621948	-0.621948	0.670782	-0.621948	0.134394	1.38149	-0.621948	-0.621948	0.157104	-0.621948	-0.621948	1.08891	-0.0220207	-0.621948	-0.621948	-0.621948	-0.621948
ATP6V1G1--NM-004888--chr9--+	1.72923	-0.698805	-0.698805	1.30032	-0.698805	-0.698805	0.205466	0.257843	-0.698805	-0.698805	0.317302	-0.698805	-0.698805	-0.698805	-0.698805	-0.698805	-0.698805	-0.698805	-0.698805	-0.698805	0.107532	-0.698805	-0.201869	-0.698805	-0.287196	0.208905	0.40482	-0.698805	-0.698805	-0.698805	-0.698805	0.0280484	2	0.662417	0.484755	0.257943	0.736276	0.632678	-0.698805	-0.698805	-0.698805	-0.698805	0.016802	0.867571	0.287255	2	0.595871	2	-0.698805
ATPIF1--NM-016311--chr1--+	-0.398917	-1.00741	2	-0.289236	0.00187325	1.24423	0.235544	-0.234381	0.0705161	-1.00741	0.368339	0.861606	1.33768	-1.00741	0.509776	-1.00741	0.75903	-1.00741	-1.00741	1.52754	0.79228	0.392004	-0.280127	1.57115	-0.155784	0.239677	0.90694	-0.290309	-1.00741	-1.00741	2	0.657204	2	0.0925402	1.013	0.704964	-0.705126	1.31797	-1.00741	-0.288507	0.345836	-0.429991	0.00356079	0.258317	1.22463	-1.00741	-0.406475	-1.00741	2
AZGP1--NM-001185--chr7---	1.48907	1.21428	1.3249	0.526311	1.31559	0.784546	1.53421	1.20262	0.913497	0.979274	0.413142	-0.0911811	2	0.941029	0.186957	-1.0475	-1.0475	-1.0475	2	1.18488	1.37162	0.870708	0.540959	1.05054	1.54414	1.41603	1.23169	-0.0526705	0.657757	0.499082	2	1.85798	2	-1.0475	-1.0475	0.0148584	1.51147	0.798541	0.692043	0.74657	1.3137	0.82232	0.824074	0.570896	0.043106	1.49669	0.871369	0.494528	-1.0475
B2M--NM-004048--chr15--+	-0.659939	-0.746578	0.234144	-0.827217	-1.45137	0.0256727	-1.63935	-0.754977	-0.63878	-1.01265	-1.20409	-0.537978	-0.549999	-1.03822	0.191388	-2	0.0218744	-2	1.06607	-1.61741	-0.743032	-0.820696	-0.335832	-0.0100732	-0.655054	-0.465591	-0.60547	-1.64853	-0.718205	-0.849799	-0.536637	-0.564464	-0.190876	-2	-0.327678	-0.976944	-0.741435	-0.296056	-0.0636109	-1.04149	-0.858717	-1.02359	-1.45024	0.373367	-0.535836	-2	-0.989563	-2	-0.275395
BCAS2--NM-005872--chr1---	0.537194	-0.43799	-0.43799	1.52406	-0.43799	-0.43799	-0.43799	-0.43799	-0.43799	-0.43799	-0.43799	-0.43799	-0.43799	-0.43799	-0.43799	-0.43799	-0.43799	-0.43799	-0.43799	0.785159	-0.43799	-0.43799	-0.43799	-0.43799	-0.43799	-0.43799	-0.43799	-0.43799	-0.43799	-0.43799	-0.43799	-0.43799	-0.43799	-0.43799	-0.43799	-0.43799	0.0464609	-0.115902	-0.43799	-0.43799	-0.43799	-0.43799	-0.43799	-0.43799	-0.43799	-0.43799	-0.43799	-0.43799	-0.43799
BGN--NM-001711--chrX--+	-0.333014	-0.333014	-0.333014	-0.333014	-0.333014	-0.333014	-0.333014	-0.333014	-0.333014	-0.333014	-0.333014	-0.333014	-0.333014	-0.333014	-0.333014	-0.333014	-0.333014	-0.333014	-0.333014	-0.333014	-0.333014	-0.333014	0.284374	-0.333014	-0.333014	-0.333014	-0.333014	-0.333014	-0.333014	-0.333014	-0.333014	-0.333014	-0.333014	-0.333014	-0.333014	-0.333014	-0.333014	-0.333014	-0.333014	-0.333014	-0.333014	-0.333014	-0.333014	-0.333014	-0.333014	-0.333014	-0.333014	-0.333014	-0.333014
BHMT--NM-001713--chr5--+	-0.51948	-0.51948	-0.51948	0.675837	1.16035	-0.51948	0.696692	-0.51948	2	-0.51948	0.847102	1.43674	-0.51948	-0.51948	-0.51948	-0.51948	-0.51948	-0.51948	-0.51948	0.750808	-0.51948	2	0.148859	-0.51948	2	-0.51948	0.317196	2	-0.51948	-0.51948	-0.51948	-0.51948	2	2	-0.51948	0.76727	1.11454	1.27126	-0.51948	-0.51948	2	0.441568	1.16316	-0.51948	0.806693	-0.51948	1.81068	-0.51948	-0.51948
BLOC1S1--NM-001487--chr12--+	0.139952	-0.658039	2	1.87859	0.0988729	-0.658039	0.300222	1.05409	-0.658039	0.681413	-0.658039	1.79302	2	1.46851	-0.658039	-0.658039	1.6585	-0.658039	-0.658039	0.342861	0.196441	1.17718	0.655118	-0.658039	0.143884	-0.658039	0.00120478	0.282382	-0.658039	-0.658039	2	1.14414	1.93606	-0.658039	0.596186	-0.658039	-0.658039	0.898307	-0.658039	-0.658039	1.11663	-0.658039	1.4993	1.95045	0.386894	-0.658039	0.713936	-0.658039	-0.658039
BLVRB--NM-000713--chr19---	0.0884322	-0.657807	1.80777	0.843612	0.579948	-0.657807	-0.657807	0.290214	-0.657807	-0.657807	0.349136	1.63429	2	-0.657807	0.470118	-0.657807	2	-0.657807	-0.657807	0.278183	0.141258	0.624585	-0.657807	1.46454	1.08355	0.241717	-0.0413166	-0.657807	-0.657807	-0.657807	-0.657807	-0.657807	1.76806	-0.657807	1.26622	-0.657807	0.962131	1.26812	-0.657807	-0.657807	1.3546	0.0503249	-0.657807	0.894442	-0.113497	-0.657807	-0.657807	-0.657807	-0.657807
BST2--NM-004335--chr19---	-0.481762	-0.481762	-0.481762	-0.481762	-0.481762	-0.481762	-0.481762	-0.481762	-0.481762	-0.481762	-0.481762	-0.481762	-0.481762	-0.481762	0.771212	-0.481762	1.92471	-0.481762	-0.481762	-0.481762	-0.481762	-0.481762	-0.481762	-0.481762	-0.481762	-0.481762	-0.481762	0.49517	-0.481762	-0.481762	-0.481762	-0.481762	1.60577	-0.481762	-0.481762	-0.481762	-0.481762	-0.481762	-0.481762	-0.481762	-0.481762	-0.481762	-0.481762	-0.481762	-0.481762	-0.481762	-0.481762	-0.481762	2
BTF3--NM-001207--chr5--+	-0.377059	-0.95183	0.947212	-0.95183	-0.406647	2	-0.95183	0.281367	0.407192	-0.95183	-0.17626	0.158376	-0.95183	-0.95183	-0.0830763	-0.95183	-0.95183	-0.95183	-0.95183	-0.230909	-0.0981461	-0.95183	0.413963	-0.95183	0.229278	-0.95183	-0.109459	-0.95183	-0.95183	-0.95183	-0.95183	-0.39704	1.52876	-0.95183	-0.0484466	-0.221567	-0.211756	0.360379	-0.95183	-0.272769	-0.95183	0.00188599	-0.405624	-0.95183	0.314271	-0.95183	-0.384198	-0.95183	-0.95183
BTG1--NM-001731--chr12---	-0.656577	-0.656577	1.28723	0.0377886	-0.0985413	1.52041	-0.656577	-0.656577	-0.0556491	-0.656577	-0.656577	-0.656577	-0.656577	-0.656577	-0.656577	-0.656577	-0.656577	-0.656577	-0.656577	-0.656577	-0.0266092	-0.656577	-0.268335	-0.656577	-0.334999	0.549165	0.771932	-0.656577	-0.656577	-0.656577	-0.656577	-0.656577	0.243006	-0.656577	-0.656577	0.0909024	-0.115571	0.861784	-0.656577	-0.656577	0.651804	-0.656577	-0.0974941	-0.656577	0.397131	-0.656577	-0.656577	-0.656577	-0.656577
BTG2--NM-006763--chr1--+	-0.48893	-0.48893	-0.48893	-0.48893	-0.48893	-0.48893	-0.48893	-0.48893	-0.48893	-0.48893	-0.48893	-0.48893	-0.48893	-0.48893	1.72504	-0.48893	-0.48893	-0.48893	-0.48893	-0.48893	-0.48893	-0.48893	-0.48893	-0.48893	-0.48893	-0.48893	-0.48893	-0.48893	-0.48893	-0.48893	-0.48893	-0.48893	-0.48893	-0.48893	-0.48893	-0.48893	-0.48893	0.646947	-0.48893	-0.48893	-0.48893	-0.48893	-0.48893	0.722522	-0.48893	-0.48893	-0.48893	-0.48893	-0.48893
C11orf31--NM-170746--chr11--+	-0.00381757	-0.749039	-0.749039	0.750331	-0.0421798	2	0.145854	1.34793	1.01301	-0.749039	0.25653	0.690403	-0.749039	1.23688	-0.749039	-0.749039	1.41431	-0.749039	2	0.832177	0.866467	-0.0134656	-0.749039	-0.749039	0.55217	-0.749039	0.731981	0.748369	-0.749039	-0.749039	-0.749039	0.506406	1.67352	-0.749039	1.17237	-0.749039	0.453318	1.37515	-0.749039	-0.749039	-0.0431743	0.487506	-0.0408532	0.801092	1.80657	-0.749039	-0.0130734	-0.749039	-0.749039
C11orf58--NM-014267--chr11--+	-0.565327	-0.565327	-0.565327	0.498919	0.289968	2	-0.565327	0.580207	-0.565327	-0.565327	0.651405	-0.565327	-0.565327	-0.565327	-0.565327	-0.565327	-0.565327	-0.565327	-0.565327	1.34793	-0.565327	-0.565327	-0.565327	-0.565327	-0.565327	0.521606	1.2267	-0.565327	-0.565327	-0.565327	-0.565327	0.30504	0.813454	-0.565327	-0.565327	0.580326	0.263867	1.4933	-0.565327	-0.565327	-0.565327	-0.565327	-0.565327	-0.565327	-0.565327	-0.565327	-0.565327	-0.565327	-0.565327
C12orf57--NM-138425--chr12--+	0.295315	-0.527116	-0.527116	0.443558	0.252979	-0.527116	-0.527116	0.517699	-0.527116	-0.527116	0.582637	-0.527116	2	-0.527116	0.715972	-0.527116	-0.527116	-0.527116	-0.527116	-0.527116	0.353535	0.284668	0.0156185	-0.527116	-0.527116	0.46425	-0.527116	-0.527116	-0.527116	-0.527116	-0.527116	-0.527116	0.730438	-0.527116	-0.527116	-0.527116	-0.527116	0.595177	-0.527116	-0.527116	0.251881	-0.527116	-0.527116	-0.527116	0.549822	-0.527116	-0.527116	-0.527116	-0.527116
C14orf2--NM-004894--chr14---	-0.6178	-0.6178	-0.6178	1.11956	0.201256	2	-0.6178	1.81201	0.264211	-0.6178	-0.6178	2	-0.6178	1.68334	0.687373	-0.6178	1.88893	-0.6178	2	0.465276	0.664733	-0.6178	0.80317	1.83806	0.889944	0.423079	-0.6178	1.11728	-0.6178	-0.6178	-0.6178	0.215689	0.702562	-0.6178	1.60858	-0.6178	0.176261	1.21416	-0.6178	-0.6178	-0.6178	0.201611	-0.6178	1.17838	-0.6178	-0.6178	0.234982	-0.6178	2
C19orf53--NM-014047--chr19--+	-0.767007	-0.767007	2	0.58731	-0.128531	-0.767007	-0.767007	0.0881317	-0.079456	-0.767007	0.141281	-0.767007	1.82717	1.02679	-0.767007	-0.767007	-0.767007	-0.767007	2	1.47021	0.232761	-0.102595	0.832503	2	-0.0905632	0.612541	-0.210917	0.0262633	-0.767007	-0.767007	-0.767007	-0.11728	0.26225	-0.767007	0.290966	-0.767007	-0.148015	0.661053	1.59803	-0.767007	0.348079	-0.767007	-0.127333	-0.767007	0.438592	-0.767007	-0.102241	-0.767007	1.30541
C19orf70--NM-205767--chr19---	0.397174	0.656191	-0.524412	2	-0.524412	-0.524412	-0.524412	1.45289	0.416923	-0.524412	0.719136	-0.524412	-0.524412	-0.524412	1.77342	-0.524412	-0.524412	-0.524412	-0.524412	0.631511	0.0151531	-0.524412	0.992132	-0.524412	-0.0206701	0.586477	-0.524412	-0.524412	-0.524412	2	2	-0.524412	2	-0.524412	0.924072	0.646491	0.323057	0.925736	-0.524412	-0.524412	1.00227	-0.524412	-0.524412	-0.524412	0.682365	-0.524412	-0.524412	-0.524412	-0.524412
C1QA--NM-015991--chr1--+	-0.313569	-0.313569	2	-0.313569	0.974003	2	-0.313569	-0.313569	-0.313569	-0.313569	-0.313569	1.18585	-0.313569	-0.313569	-0.313569	-0.313569	-0.313569	-0.313569	-0.313569	-0.313569	-0.313569	1.4717	0.614248	-0.313569	-0.313569	-0.313569	-0.313569	-0.313569	-0.313569	-0.313569	-0.313569	-0.313569	-0.313569	-0.313569	-0.313569	-0.313569	-0.313569	-0.0571784	-0.313569	-0.313569	-0.313569	-0.313569	-0.313569	-0.313569	0.252648	2	-0.313569	-0.313569	-0.313569
C1QB--NM-000491--chr1--+	-0.361048	-0.361048	-0.361048	0.609627	-0.361048	-0.361048	-0.361048	-0.361048	0.479008	1.01943	-0.361048	-0.361048	-0.361048	1.83063	-0.361048	-0.361048	2	-0.361048	-0.361048	-0.361048	0.120465	-0.361048	0.181687	-0.361048	-0.361048	-0.361048	-0.361048	-0.361048	-0.361048	2	-0.361048	-0.361048	-0.361048	-0.361048	0.931592	-0.361048	-0.361048	-0.0894118	-0.361048	-0.361048	-0.361048	-0.361048	-0.361048	-0.361048	-0.361048	-0.361048	-0.361048	-0.361048	-0.361048
C1R--NM-001733--chr12---	1.85676	1.28347	0.62113	-0.0557235	1.01694	0.828766	1.1892	0.647694	0.385874	-0.230408	0.435778	0.924556	1.73645	-1.10975	0.196449	-1.10975	1.14795	-1.10975	-1.10975	1.4127	0.662934	0.0950552	1.00514	1.59809	1.35795	0.304484	0.162277	-0.0571033	0.05026	2	0.926267	0.323374	0.898173	-0.162762	0.240958	1.09097	1.04451	0.512508	-1.10975	1.1659	1.01507	1.01752	1.94071	1.0406	0.232638	0.775867	0.348391	-1.10975	-1.10975
C1S--NM-001734--chr12--+	1.13369	1.77187	-0.926054	0.769835	0.49624	-0.926054	1.13054	0.871477	0.897698	0.146206	-0.0640735	-0.926054	-0.926054	0.776291	-0.926054	-0.926054	-0.926054	2	1.85294	-0.926054	0.642947	0.171721	0.373475	-0.926054	0.875492	0.38316	0.01017	-0.173227	-0.0845339	-0.926054	-0.926054	0.821486	0.682608	0.929223	-0.926054	0.444663	0.615558	0.319835	1.31841	0.771202	0.494608	1.28492	1.28709	0.402729	0.21808	1.37325	1.54978	-0.926054	1.04071
C3--NM-000064--chr19---	1.51728	1.08825	1.11868	1.57993	1.20386	1.02149	1.00307	0.156011	1.58178	1.12688	0.828831	0.989076	0.0100395	0.986795	-0.0120537	0.209181	0.892824	0.784524	0.91204	1.37226	1.55095	1.57188	0.996955	0.563742	0.997716	0.367103	1.1167	0.340395	0.197954	1.63044	0.69067	1.13208	1.08931	1.01815	0.565794	0.925198	1.09504	1.12927	-0.133299	0.0742873	1.552	1.62003	1.45059	0.387352	1.04364	-0.097145	1.85095	0.309766	1.4327
C4A--NM-001252204-3--chr6--+	1.58221	-0.165503	1.93977	1.46728	0.401444	-0.933719	0.996889	-0.171894	1.24772	1.52114	0.835434	1.39494	1.37738	0.664339	0.998385	-0.933719	2	-0.933719	-0.933719	1.05937	0.972451	1.19798	0.0530935	0.771786	1.11873	0.295292	1.29636	0.271235	-0.933719	-0.933719	1.39689	1.95709	2	0.150288	0.612424	-0.171814	0.647427	0.923266	1.17324	1.6712	1.79521	0.401917	1.50355	1.02651	0.6029	1.22473	1.71926	0.934011	1.77843
C4BPA--NM-000715--chr1--+	1.60092	1.07064	-0.696506	1.47421	0.659721	-0.696506	-0.696506	1.05783	1.63787	1.53339	1.15216	-0.696506	2	1.48247	0.539379	-0.696506	2	-0.696506	2	0.329072	1.07605	0.110574	1.49603	-0.696506	0.447869	0.979269	0.928487	-0.696506	-0.696506	-0.696506	2	-0.696506	1.36256	0.781554	0.588643	-0.696506	0.622735	1.0382	2	0.269523	0.65802	2	1.51402	-0.696506	2	-0.696506	0.111004	-0.696506	-0.696506
C4orf3--NM-001001701--chr4---	-0.741185	0.20254	-0.741185	-0.741185	-0.042429	-0.741185	-0.741185	2	0.0112795	-0.741185	0.252857	1.52155	-0.741185	-0.741185	0.372289	-0.741185	-0.741185	-0.741185	2	0.182813	0.855802	0.524777	0.471078	-0.741185	0.289843	0.146814	-0.132593	-0.741185	0.229262	-0.741185	-0.741185	1.57507	2	-0.741185	0.416674	-0.741185	0.207361	0.821703	2	0.129162	-0.0434121	0.481185	-0.741185	0.791176	0.881566	-0.741185	-0.741185	-0.741185	-0.741185
C7--NM-000587--chr5--+	-0.54403	-0.54403	-0.54403	-0.54403	-0.54403	-0.54403	-0.54403	-0.54403	-0.54403	-0.54403	-0.54403	-0.54403	-0.54403	-0.54403	-0.54403	-0.54403	-0.54403	-0.54403	-0.54403	-0.54403	-0.54403	-0.54403	-0.54403	-0.54403	-0.54403	-0.54403	-0.54403	-0.54403	-0.54403	-0.54403	-0.54403	-0.54403	-0.54403	-0.54403	-0.54403	-0.54403	-0.54403	-0.339743	-0.54403	-0.54403	-0.54403	-0.54403	-0.54403	-0.54403	-0.54403	-0.54403	-0.54403	-0.54403	-0.54403
C8A--NM-000562--chr1--+	1.76345	0.705811	-0.593007	0.603608	-0.593007	-0.593007	0.624486	0.695007	1.20302	1.1088	0.77506	-0.593007	-0.593007	-0.593007	2	-0.593007	2	-0.593007	-0.593007	1.55822	0.00058558	-0.593007	2	-0.593007	2	-0.593007	-0.593007	-0.593007	-0.593007	-0.593007	2	1.6967	1.96013	-0.593007	-0.593007	0.695141	1.85372	0.561896	2	2	1.08654	1.0893	1.09146	-0.593007	2	-0.593007	-0.593007	-0.593007	-0.593007
C8B--NM-000066--chr1---	1.5662	1.41221	-0.629187	1.27126	0.266753	-0.629187	-0.629187	1.39742	0.335618	1.94678	2	-0.629187	-0.629187	-0.629187	0.798502	-0.629187	-0.629187	-0.629187	-0.629187	1.375	0.382242	-0.629187	0.499774	-0.629187	1.02009	1.30666	1.248	-0.629187	2	2	2	0.282542	2	1.07826	0.855412	1.3976	1.17091	0.65977	2	-0.629187	-0.629187	0.938127	1.47708	-0.629187	1.06257	2	1.54406	-0.629187	2
C8G--NM-000606--chr9--+	1.54138	1.39803	-0.502315	0.53548	-0.502315	-0.502315	-0.502315	-0.502315	0.395829	-0.502315	0.684176	2	-0.502315	-0.502315	-0.502315	-0.502315	2	-0.502315	2	-0.502315	1.12172	1.5199	0.548643	-0.502315	1.54954	-0.502315	1.96822	1.26451	-0.502315	-0.502315	2	0.34642	2	-0.502315	0.879709	-0.502315	1.40647	0.0482895	-0.502315	0.536534	0.330549	0.332084	0.958583	-0.502315	0.649092	-0.502315	1.00946	-0.502315	-0.502315
C8orf4--NM-020130--chr8--+	-0.490773	-0.490773	-0.490773	0.524148	-0.490773	-0.490773	0.541856	-0.490773	0.387574	-0.490773	-0.490773	-0.490773	-0.490773	-0.490773	1.6533	-0.490773	-0.490773	-0.490773	-0.490773	-0.490773	0.012688	-0.490773	0.0767009	-0.490773	0.373385	-0.490773	1.21819	-0.490773	-0.490773	-0.490773	-0.490773	0.957901	-0.490773	1.06367	-0.490773	-0.490773	-0.490773	1.18636	-0.490773	-0.490773	-0.490773	-0.490773	-0.490773	1.29794	0.136457	-0.490773	-0.490773	-0.490773	-0.490773
C9--NM-001737--chr5---	1.37679	0.253753	-0.687365	1.26294	0.531156	2	1.2899	1.77715	1.04967	2	0.973593	-0.687365	-0.687365	-0.687365	0.423033	-0.687365	-0.687365	2	-0.687365	2	1.11702	0.0377671	0.80712	1.402	2	1.68436	0.772632	-0.687365	-0.687365	-0.687365	-0.687365	0.550259	2	0.640619	2	-0.687365	2	0.315132	1.89381	1.26452	0.529628	0.948882	0.533193	-0.687365	1.64046	1.95689	1.92506	-0.687365	-0.687365
CALD1--NM-004342--chr7--+	-0.379066	-0.379066	-0.379066	-0.379066	-0.379066	-0.379066	0.341354	-0.379066	-0.379066	-0.379066	-0.379066	-0.379066	-0.379066	-0.379066	-0.379066	-0.379066	-0.379066	-0.379066	-0.379066	-0.379066	-0.379066	-0.379066	-0.379066	-0.379066	-0.379066	-0.379066	-0.379066	-0.379066	-0.379066	-0.379066	-0.379066	-0.379066	0.538267	-0.379066	-0.379066	-0.379066	-0.379066	-0.379066	-0.379066	-0.379066	-0.379066	-0.379066	-0.379066	-0.379066	-0.379066	-0.379066	-0.379066	-0.379066	-0.379066
CALD1--NM-033140--chr7--+	1.53206	0.0507492	-0.772483	1.80046	0.293404	2	1.29639	1.38332	1.56518	0.306175	0.0946412	1.20135	-0.772483	-0.772483	-0.772483	-0.772483	1.99697	-0.772483	-0.772483	1.01767	0.620603	0.331843	0.5348	-0.772483	1.93186	0.00213764	1.03306	-0.0151638	0.650464	-0.772483	-0.772483	0.678808	1.69058	1.09386	0.237542	0.0439857	0.0549542	0.590858	2	-0.0132603	-0.772483	1.45169	0.964817	-0.772483	0.0690002	-0.772483	1.71813	-0.772483	-0.772483
CALM1--NM-006888--chr14--+	-0.539046	-1.02522	0.581096	0.265458	-0.564073	-1.02522	-0.441402	-0.407586	0.900415	-1.02522	-1.02522	-1.02522	-1.02522	-1.02522	0.186977	-1.02522	-1.02522	-1.02522	-1.02522	0.329116	0.028717	0.0928794	-0.444136	1.03499	0.232622	-0.439182	0.340762	-1.02522	-0.38477	-1.02522	-1.02522	-0.555947	1.073	-1.02522	0.589039	-0.407522	-0.578146	0.48029	0.682955	-0.0461791	-1.02522	-0.563873	-0.563208	-1.02522	-0.154462	-1.02522	0.528521	-1.02522	0.471608
CALM2--NM-001743--chr2---	0.987901	-0.731651	-0.731651	0.756886	-0.731651	2	-0.731651	0.208236	-0.731651	-0.731651	-0.731651	0.697391	-0.731651	-0.731651	1.11302	-0.731651	-0.731651	-0.731651	-0.731651	-0.731651	0.3672	-0.731651	-0.731651	-0.731651	-0.731651	-0.731651	-0.120449	-0.731651	0.906561	1.57943	-0.731651	-0.731651	-0.731651	-0.731651	-0.731651	0.208334	-0.364115	0.711277	-0.731651	-0.731651	-0.731651	-0.0295942	0.497537	-0.731651	-0.731651	-0.731651	0.540341	-0.731651	1.54615
CALR--NM-004343--chr19--+	0.0971101	-0.6855	-0.6855	1.39215	0.612582	-0.6855	-0.6855	0.308726	-0.6855	0.628135	0.37052	-0.6855	-0.6855	-0.6855	0.497399	-0.6855	-0.6855	-0.6855	-0.6855	-0.6855	-0.227302	0.086978	-0.169044	1.54028	0.409813	0.257865	0.461476	-0.6855	0.345454	-0.6855	-0.6855	-0.6855	-0.6855	-0.6855	0.544551	-0.6855	0.805952	0.205977	-0.6855	-0.6855	-0.6855	-0.6855	0.0582163	2	-0.114661	-0.6855	0.0873899	-0.6855	-0.6855
CCDC152--NM-001134848--chr5--+	2	0.251816	-0.725345	0.809351	0.539843	-0.725345	-0.725345	1.42102	1.45233	-0.725345	0.303915	0.74801	2	-0.725345	-0.725345	-0.725345	1.48897	2	-0.725345	-0.725345	0.0914301	1.02889	0.186342	-0.725345	1.24814	1.33383	1.67439	0.807342	0.963667	-0.725345	-0.725345	0.559678	0.440996	-0.725345	1.80734	0.91138	1.59113	1.24326	1.95469	1.30129	-0.00285038	-0.725345	0.541959	-0.725345	1.47272	-0.725345	1.02965	-0.725345	-0.725345
CCL14--NM-032963--chr17---	-0.400634	-0.400634	-0.400634	-0.400634	-0.400634	-0.400634	-0.400634	-0.400634	-0.400634	-0.400634	-0.400634	-0.400634	-0.400634	-0.400634	-0.400634	-0.400634	-0.400634	-0.400634	-0.400634	-0.400634	-0.400634	0.13095	-0.400634	-0.400634	-0.400634	-0.400634	-0.400634	-0.400634	-0.400634	-0.400634	-0.400634	-0.400634	0.422855	-0.400634	-0.400634	-0.400634	-0.13309	-0.222757	-0.400634	-0.400634	-0.400634	-0.400634	-0.400634	-0.400634	-0.400634	-0.400634	-0.400634	-0.400634	-0.400634
CCL21--NM-002989--chr9---	-0.16718	-0.16718	-0.16718	-0.16718	-0.16718	-0.16718	-0.16718	-0.16718	-0.16718	-0.16718	-0.16718	-0.16718	-0.16718	-0.16718	-0.16718	-0.16718	-0.16718	-0.16718	-0.16718	1.0872	-0.16718	-0.16718	-0.16718	-0.16718	-0.16718	-0.16718	-0.16718	-0.16718	-0.16718	-0.16718	-0.16718	-0.16718	-0.16718	-0.16718	-0.16718	-0.16718	-0.16718	-0.16718	-0.16718	-0.16718	-0.16718	-0.16718	-0.16718	-0.16718	-0.16718	-0.16718	-0.16718	-0.16718	-0.16718
CCL3--NM-002983--chr17---	-0.316967	-0.316967	-0.316967	-0.316967	-0.316967	-0.316967	-0.316967	-0.316967	-0.316967	-0.316967	-0.316967	-0.316967	-0.316967	-0.316967	-0.316967	-0.316967	-0.316967	-0.316967	-0.316967	-0.316967	-0.316967	-0.316967	-0.316967	-0.316967	-0.316967	-0.316967	-0.316967	-0.316967	-0.316967	-0.316967	-0.316967	0.363168	-0.316967	-0.316967	-0.316967	-0.316967	-0.316967	-0.316967	-0.316967	-0.316967	-0.316967	-0.316967	-0.316967	-0.316967	-0.316967	-0.316967	-0.316967	-0.316967	-0.316967
CCL4--NM-002984-1--chr17--+	-0.381029	-0.381029	-0.381029	-0.381029	-0.381029	-0.381029	-0.381029	-0.381029	-0.381029	-0.381029	-0.381029	-0.381029	-0.381029	-0.381029	-0.381029	-0.381029	-0.381029	-0.381029	-0.381029	-0.381029	-0.381029	-0.381029	-0.381029	-0.381029	-0.381029	-0.381029	-0.381029	-0.381029	-0.381029	-0.381029	-0.381029	-0.381029	-0.381029	-0.381029	-0.381029	-0.381029	-0.381029	-0.381029	-0.381029	-0.381029	-0.381029	-0.381029	-0.381029	-0.381029	-0.381029	-0.381029	-0.381029	-0.381029	-0.381029
CCL5--NM-002985--chr17---	-0.418662	-0.418662	-0.418662	-0.418662	-0.418662	-0.418662	-0.418662	-0.418662	-0.418662	-0.418662	-0.418662	-0.418662	-0.418662	-0.418662	-0.418662	-0.418662	-0.418662	-0.418662	-0.418662	-0.418662	-0.418662	-0.418662	-0.418662	-0.418662	-0.418662	-0.418662	-0.418662	-0.418662	-0.418662	-0.418662	-0.418662	-0.418662	-0.418662	-0.418662	-0.418662	-0.418662	-0.418662	-0.418662	-0.418662	-0.418662	-0.418662	-0.418662	-0.418662	-0.418662	-0.418662	-0.418662	-0.418662	-0.418662	-0.418662
CCND1--NM-053056--chr11--+	-0.460324	-0.460324	-0.460324	-0.460324	-0.460324	-0.460324	-0.460324	-0.460324	-0.460324	-0.460324	0.765594	-0.460324	-0.460324	-0.460324	-0.460324	-0.460324	-0.460324	-0.460324	-0.460324	-0.460324	0.51251	-0.460324	-0.460324	2	1.40662	-0.460324	-0.460324	-0.460324	-0.460324	-0.460324	-0.460324	-0.460324	-0.460324	-0.460324	0.967624	-0.460324	0.37513	-0.160254	-0.460324	0.613046	-0.460324	0.401802	-0.460324	-0.460324	-0.460324	-0.460324	-0.460324	-0.460324	-0.460324
CD14--NM-001174105--chr5---	0.347906	0.589646	-0.512209	0.502942	0.914427	-0.512209	-0.512209	-0.512209	-0.512209	-0.512209	-0.512209	-0.512209	-0.512209	-0.512209	1.63235	-0.512209	-0.512209	-0.512209	-0.512209	0.566612	1.35237	-0.512209	0.515817	-0.512209	1.49487	0.524582	-0.512209	-0.512209	0.620844	-0.512209	-0.512209	0.318006	0.802967	-0.512209	0.839659	-0.512209	1.56347	0.841212	-0.512209	-0.512209	1.80729	0.303984	-0.512209	-0.512209	-0.512209	2	0.337223	-0.512209	-0.512209
CD37--NM-001774--chr19--+	-0.331422	-0.331422	-0.331422	-0.331422	-0.331422	-0.331422	-0.331422	-0.331422	-0.331422	-0.331422	-0.331422	-0.331422	-0.331422	-0.331422	-0.331422	-0.331422	-0.331422	-0.331422	-0.331422	-0.331422	-0.331422	-0.331422	-0.331422	-0.331422	-0.331422	-0.331422	-0.331422	-0.331422	-0.331422	-0.331422	-0.331422	-0.331422	-0.331422	-0.331422	-0.331422	-0.331422	-0.331422	-0.331422	-0.331422	-0.331422	-0.331422	-0.331422	-0.331422	-0.331422	-0.331422	-0.331422	-0.331422	-0.331422	-0.331422
CD3D--NM-000732--chr11---	-0.361895	-0.361895	-0.361895	-0.361895	-0.361895	-0.361895	-0.361895	-0.361895	-0.361895	-0.361895	-0.361895	-0.361895	-0.361895	-0.361895	-0.361895	-0.361895	-0.361895	-0.361895	-0.361895	-0.361895	-0.361895	-0.361895	-0.361895	-0.361895	-0.361895	-0.361895	-0.361895	-0.361895	-0.361895	-0.361895	-0.361895	-0.361895	-0.361895	-0.361895	-0.361895	-0.361895	-0.361895	-0.361895	-0.361895	-0.361895	-0.361895	-0.361895	-0.361895	-0.361895	-0.361895	-0.361895	-0.361895	-0.361895	-0.361895
CD52--NM-001803--chr1--+	-0.444634	-0.444634	-0.444634	-0.444634	-0.444634	-0.444634	-0.444634	-0.444634	-0.444634	-0.444634	-0.444634	-0.444634	-0.444634	-0.444634	-0.444634	-0.444634	-0.444634	-0.444634	-0.444634	-0.444634	-0.444634	-0.444634	-0.444634	-0.444634	-0.444634	-0.444634	-0.444634	-0.444634	-0.444634	-0.444634	-0.444634	-0.444634	-0.444634	-0.444634	-0.444634	-0.444634	-0.444634	-0.444634	-0.444634	-0.444634	-0.444634	-0.444634	-0.444634	-0.444634	-0.444634	-0.444634	-0.444634	-0.444634	-0.444634
CD63--NM-001780--chr12---	-1.07939	-1.07939	1.12954	-0.151896	-1.07939	0.626421	-1.07939	-1.07939	-1.07939	-0.305612	-1.07939	0.336547	-1.07939	0.149081	0.673029	-1.07939	-1.07939	1.54511	-1.07939	-0.101267	-0.394707	-0.0192162	-0.320802	0.231679	0.113287	-1.07939	-1.07939	-1.07939	-0.472122	1.03044	-1.07939	-0.0383016	0.687497	-1.07939	-1.07939	-0.493695	0.0330905	0.639452	-1.07939	-1.07939	-1.07939	-1.07939	-0.313495	1.11029	-0.743148	-1.07939	-1.07939	-1.07939	0.339893
CD69--NM-001781--chr12---	-0.464233	-0.464233	-0.464233	-0.464233	-0.464233	-0.464233	-0.464233	-0.464233	-0.464233	-0.464233	-0.464233	-0.464233	-0.464233	-0.464233	-0.464233	-0.464233	-0.464233	-0.464233	-0.464233	-0.464233	-0.464233	-0.464233	-0.464233	-0.464233	-0.464233	-0.464233	-0.464233	-0.464233	-0.464233	-0.464233	-0.464233	-0.464233	-0.464233	-0.464233	-0.464233	-0.464233	-0.464233	-0.464233	-0.464233	-0.464233	-0.464233	-0.464233	-0.464233	-0.464233	0.0736624	-0.464233	-0.464233	-0.464233	-0.464233
CD74--NM-001025158--chr5---	-0.568572	-0.568572	-0.568572	0.0228432	-0.568572	-0.568572	-0.568572	0.0680158	-0.568572	-0.568572	-0.568572	-0.568572	-0.568572	-0.568572	0.18882	-0.568572	-0.568572	-0.568572	-0.568572	-0.568572	-0.0320067	-0.568572	-0.237893	-0.568572	-0.294673	-0.568572	-0.568572	-0.568572	-0.568572	-0.568572	-0.568572	-0.568572	-0.568572	-0.568572	-0.568572	-0.568572	-0.568572	-0.568572	-0.568572	-0.568572	-0.568572	-0.568572	-0.568572	1.06941	-0.568572	-0.568572	-0.568572	-0.568572	-0.568572
CD74--NM-004355--chr5---	0.0166031	-0.559024	-0.559024	-0.559024	-0.559024	-0.559024	-0.559024	-0.559024	-0.559024	-0.559024	-0.559024	0.552836	-0.559024	-0.559024	-0.559024	-0.559024	-0.559024	-0.559024	-0.559024	-0.559024	-0.559024	-0.559024	-0.179159	-0.559024	-0.244385	-0.559024	-0.559024	-0.559024	-0.559024	-0.559024	-0.559024	-0.559024	-0.559024	-0.559024	-0.559024	-0.559024	-0.559024	-0.559024	-0.559024	-0.559024	-0.013797	-0.559024	-0.559024	-0.559024	-0.559024	-0.559024	-0.559024	-0.559024	-0.559024
CD81--NM-001297649--chr11--+	-0.626339	0.37912	1.96687	1.45731	-0.626339	-0.626339	-0.626339	1.05763	0.764027	-0.626339	-0.626339	0.889684	2	-0.626339	-0.626339	-0.626339	-0.626339	-0.626339	2	-0.626339	0.539395	0.148368	0.970319	-0.626339	0.986504	-0.626339	0.022064	0.298617	0.407589	1.82541	2	-0.626339	0.573779	-0.626339	0.607261	-0.626339	0.0954073	1.03879	-0.626339	0.300942	0.673856	0.118449	0.677665	-0.626339	0.401411	-0.626339	1.17948	-0.626339	1.79011
CD9--NM-001769--chr12--+	1.21065	-0.478319	-0.478319	-0.478319	-0.478319	-0.478319	-0.478319	0.755907	-0.478319	-0.478319	-0.478319	-0.478319	-0.478319	-0.478319	-0.478319	-0.478319	-0.478319	-0.478319	-0.478319	-0.478319	-0.478319	-0.478319	-0.478319	-0.478319	0.0527207	-0.478319	-0.478319	-0.478319	-0.478319	-0.478319	-0.478319	-0.478319	-0.478319	-0.478319	-0.478319	-0.478319	-0.478319	-0.157439	-0.478319	-0.478319	-0.478319	-0.478319	-0.478319	1.54255	-0.478319	-0.478319	-0.478319	-0.478319	-0.478319
CES1--NM-001266--chr16---	2	1.68215	2	-0.681629	1.5713	-0.681629	1.56449	0.378566	0.796725	-0.681629	1.78041	0.930333	2	-0.681629	-0.681629	-0.681629	-0.681629	-0.681629	-0.681629	0.365111	1.1275	1.23764	-0.681629	1.69184	0.775533	1.02873	0.541451	-0.681629	0.41773	-0.681629	2	-0.681629	1.41992	0.82693	0.630038	2	0.392921	0.268999	-0.681629	0.304334	1.17432	0.703118	1.57451	1.05429	0.813064	2	1.23847	-0.681629	-0.681629
CFB--NM-001710-5--chr6--+	1.93858	2	1.72137	1.21503	0.827043	0.431749	1.23875	0.271778	0.686568	0.843617	1.29433	-1.28086	2	-0.0474912	0.891711	-1.28086	0.713739	-1.28086	2	1.19208	1.76944	0.645266	1.12618	1.69555	1.73747	-0.722965	1.41358	0.393341	0.709369	0.837377	1.71906	0.618633	1.6891	0.428742	0.753423	1.31721	1.82033	0.529478	1.84672	1.40563	1.59784	1.41217	1.76702	0.917545	0.862267	0.385014	0.979373	-1.28086	1.84701
CFH--NM-000186--chr1--+	0.230367	0.972447	-0.948903	0.415898	0.176225	1.56118	-0.134327	-0.0871452	0.9877	-0.948903	-0.0335846	1.68521	1.66535	0.858781	0.0763893	-0.948903	-0.948903	-0.948903	2	-0.948903	0.717186	0.611134	1.057	-0.948903	1.37278	0.441324	0.698175	-0.948903	-0.948903	1.17007	-0.948903	0.906772	1.65105	0.277299	0.800056	1.32689	1.4579	1.30539	1.43444	1.20898	1.15533	0.176661	-0.304278	0.462103	-0.0606506	-0.948903	0.939166	-0.948903	1.13956
CFH--NM-001014975--chr1--+	1.22014	0.754957	-0.795238	0.647922	-0.114879	-0.795238	0.0661062	-0.795238	-0.795238	2	-0.795238	-0.795238	-0.795238	-0.795238	-0.795238	2	-0.795238	-0.795238	-0.795238	1.2029	0.759704	0.854367	0.9092	-0.795238	0.678723	0.069382	0.946407	0.0500704	0.793034	-0.795238	2	1.46004	0.301538	-0.795238	0.332137	0.116092	0.935755	0.021825	-0.795238	0.649205	1.91044	0.39495	0.804223	0.69678	-0.795238	1.78653	1.4971	-0.795238	1.41313
CFHR1--NM-002113--chr1--+	0.892541	0.254644	2	1.56261	1.22327	-1.04209	0.572799	1.24331	0.921816	0.594213	-0.232468	0.116859	-1.04209	0.55685	0.891079	-1.04209	-1.04209	-1.04209	1.5681	1.22343	0.988206	-0.449851	-0.324951	-1.04209	0.779207	0.894971	0.414791	0.163529	0.286495	2	-1.04209	0.599299	0.468858	-1.04209	-0.0990434	0.646393	1.64124	1.59716	1.06603	0.866611	0.292277	0.578228	1.03662	1.42076	1.01553	1.11755	0.338397	0.82667	1.67156
CFHR2--NM-005666--chr1--+	0.0953326	0.311982	-0.675511	0.234277	1.40547	-0.675511	0.25015	1.49355	0.111851	-0.675511	0.364632	0.813422	-0.675511	2	-0.675511	-0.675511	2	2	2	-0.675511	0.995539	0.0853528	1.1562	-0.675511	0.0991311	0.904304	1.4903	0.232917	0.339942	1.73243	-0.675511	0.0685361	2	-0.675511	-0.675511	-0.675511	1.18474	1.42027	2	-0.675511	0.0546228	1.71884	1.04338	0.927917	1.0225	-0.675511	1.09804	-0.675511	1.69776
CFI--NM-000204--chr4---	2	2	-0.609135	-0.609135	0.301341	-0.609135	1.3516	-0.609135	-0.609135	-0.609135	0.686097	-0.609135	-0.609135	2	2	-0.609135	-0.609135	-0.609135	-0.609135	-0.609135	1.47173	1.04041	0.538142	-0.609135	1.0669	0.547923	1.29851	1.31961	-0.609135	-0.609135	-0.609135	-0.609135	2	-0.609135	-0.609135	0.610432	0.626816	1.08811	2	0.524923	0.30006	-0.609135	-0.609135	-0.609135	0.0910117	-0.609135	1.59937	-0.609135	-0.609135
CFL1--NM-005507--chr11---	-0.765525	-0.765525	-0.765525	-0.0620562	-0.765525	-0.765525	-0.765525	-0.00832491	-0.156719	-0.765525	-0.765525	0.385752	-0.765525	-0.765525	-0.765525	-0.765525	-0.765525	-0.765525	-0.765525	-0.765525	-0.765525	-0.177208	-0.765525	-0.765525	-0.765525	-0.765525	-0.765525	-0.765525	-0.765525	-0.765525	-0.765525	-0.765525	-0.765525	-0.765525	-0.765525	-0.765525	-0.765525	-0.232558	-0.765525	-0.765525	-0.765525	-0.199928	-0.765525	-0.765525	-0.330775	1.37982	-0.765525	-0.765525	-0.765525
CHCHD2--NM-016139--chr7---	0.125234	-0.47774	0.691557	0.316291	0.342213	-1.21821	-0.524104	1.2098	-0.194275	-0.247992	0.487048	-0.101735	-1.21821	-1.21821	-1.21821	-1.21821	0.459751	-1.21821	1.29633	0.964286	0.0348262	0.11111	-1.21821	0.425699	-0.208953	0.342184	-0.0694858	-0.537027	0.0616849	1.42724	-1.21821	0.599183	1.72328	-1.21821	0.272092	-1.21821	0.176695	1.09312	-1.21821	-0.535315	-0.260682	-0.669712	-0.257876	0.671222	0.447432	-1.21821	-0.647374	0.582065	-1.21821
CHMP2A--NM-014453--chr19---	0.386902	-0.575535	-0.575535	-0.575535	1.56731	-0.575535	0.5802	-0.575535	-0.575535	2	-0.575535	-0.575535	-0.575535	-0.575535	1.82415	-0.575535	2	-0.575535	-0.575535	0.631626	-0.575535	-0.575535	-0.575535	-0.575535	-0.575535	-0.575535	-0.575535	0.558683	0.692309	-0.575535	-0.575535	-0.575535	0.896097	-0.575535	1.90592	-0.575535	0.309499	1.12621	2	-0.575535	-0.575535	-0.575535	0.339071	-0.575535	-0.575535	-0.575535	-0.575535	-0.575535	-0.575535
CIB1--NM-006384--chr15---	0.309751	-0.548239	2	-0.548239	0.265584	-0.548239	-0.548239	-0.548239	-0.548239	-0.548239	-0.548239	-0.548239	-0.548239	-0.548239	-0.548239	-0.548239	-0.548239	-0.548239	2	-0.548239	0.370488	-0.548239	-0.548239	1.89193	-0.548239	-0.548239	0.160572	-0.548239	-0.548239	-0.548239	-0.548239	-0.548239	0.763687	-0.548239	0.800289	0.541863	0.240749	0.96883	2	0.465432	-0.548239	-0.548239	-0.548239	-0.548239	0.575261	-0.548239	-0.548239	-0.548239	-0.548239
CLEC2B--NM-005127--chr12---	-0.408175	-0.408175	-0.408175	-0.408175	-0.408175	-0.408175	-0.408175	-0.408175	-0.408175	-0.408175	0.755275	-0.408175	-0.408175	-0.408175	-0.408175	-0.408175	-0.408175	-0.408175	-0.408175	-0.408175	-0.408175	-0.408175	-0.408175	-0.408175	-0.408175	-0.408175	-0.408175	-0.408175	-0.408175	-0.408175	-0.408175	-0.408175	-0.408175	-0.408175	-0.408175	-0.408175	-0.408175	-0.408175	-0.408175	-0.408175	-0.408175	-0.408175	-0.408175	-0.408175	-0.408175	-0.408175	-0.408175	-0.408175	-0.408175
CLEC3B--NM-003278--chr3--+	-0.344404	-0.344404	-0.344404	-0.344404	-0.344404	-0.344404	-0.344404	-0.344404	-0.344404	-0.344404	-0.344404	1.22692	-0.344404	-0.344404	0.885183	-0.344404	-0.344404	-0.344404	-0.344404	-0.344404	-0.344404	-0.344404	-0.344404	-0.344404	-0.344404	0.636195	-0.344404	-0.344404	-0.344404	-0.344404	-0.344404	-0.344404	-0.344404	-0.344404	-0.344404	-0.344404	-0.344404	-0.344404	-0.344404	-0.344404	-0.344404	-0.344404	-0.344404	-0.344404	-0.344404	-0.344404	-0.344404	-0.344404	-0.344404
CLIC1--NM-001287594-5--chr6---	-0.573732	-0.573732	-0.573732	-0.573732	-0.573732	-0.573732	-0.573732	0.514167	-0.573732	-0.573732	-0.573732	-0.573732	-0.573732	-0.573732	-0.573732	-0.573732	-0.573732	-0.573732	-0.573732	-0.573732	-0.0723644	-0.573732	-0.573732	1.86176	-0.573732	-0.573732	-0.573732	-0.573732	-0.573732	-0.573732	-0.573732	-0.573732	-0.573732	-0.573732	-0.573732	-0.573732	0.213743	-0.290895	-0.573732	-0.573732	-0.573732	-0.573732	-0.573732	1.20755	-0.573732	-0.573732	-0.573732	-0.573732	-0.573732
CLIC1--NM-001288--chr6---	-0.655647	-0.655647	1.73503	0.198348	-0.655647	-0.655647	-0.655647	-0.655647	0.0834298	-0.655647	-0.655647	-0.655647	-0.655647	-0.655647	-0.655647	-0.655647	-0.655647	-0.655647	-0.655647	-0.655647	-0.232015	-0.655647	-0.655647	-0.655647	-0.655647	0.216553	-0.655647	-0.655647	-0.655647	-0.655647	-0.655647	-0.655647	-0.655647	-0.655647	-0.655647	-0.655647	-0.655647	0.168579	-0.655647	-0.655647	-0.655647	-0.655647	-0.655647	1.70958	-0.655647	-0.655647	-0.655647	-0.655647	-0.655647
CLU--NM-001831--chr8---	2	-0.547233	-0.547233	0.544019	-0.547233	-0.547233	-0.547233	-0.547233	0.397174	-0.547233	-0.547233	1.23868	-0.547233	-0.547233	1.7581	-0.547233	-0.547233	-0.547233	-0.547233	0.612463	0.442813	0.365391	0.0629202	2	-0.041847	0.567281	1.29026	0.542388	-0.547233	-0.547233	-0.547233	0.34522	-0.547233	-0.547233	1.83665	1.43671	1.89062	0.714472	2	-0.547233	-0.547233	0.330146	-0.547233	-0.547233	0.12717	-0.547233	1.04241	-0.547233	2
CLU--NR-045494--chr8---	1.91017	0.480224	1.53288	0.666291	0.986933	0.946516	1.76002	0.111181	1.24232	1.65171	0.17316	1.66086	-1.04154	1.60659	1.48046	-1.04154	0.518113	-1.04154	-1.04154	1.54538	0.776446	0.453263	1.02765	-1.04154	0.980352	0.932462	0.956442	0.664413	0.513956	0.636743	1.89746	0.839619	1.0177	-1.04154	-1.04154	1.8498	1.82733	1.47424	0.846136	0.0403828	0.985074	0.817976	1.28085	-1.04154	0.335153	1.7193	0.453864	-1.04154	0.61258
COL18A1--NM-130445--chr21--+	0.336308	0.610833	-0.640461	1.95264	-0.640461	-0.640461	0.532484	1.45524	0.357239	2	2	1.24623	-0.640461	-0.640461	0.835905	-0.640461	2	-0.640461	-0.640461	0.584676	0.810295	0.323662	2	-0.640461	0.726589	-0.640461	0.79107	0.510647	2	-0.640461	2	1.00506	-0.640461	-0.640461	0.894755	2	0.935481	0.692442	2	0.51354	0.284723	0.98029	1.53762	-0.640461	0.638575	-0.640461	1.03888	-0.640461	2
COMMD6--NM-203495--chr13---	-0.879469	-0.077913	-0.879469	0.78162	-0.879469	-0.879469	-0.879469	0.462999	0.228936	-0.879469	-0.879469	1.04239	-0.879469	-0.879469	-0.879469	-0.879469	-0.879469	-0.879469	-0.879469	-0.0946687	-0.513138	0.195779	0.15017	0.900053	-0.537459	-0.879469	0.0375433	-0.879469	-0.879469	-0.879469	-0.879469	0.174623	0.696183	-0.879469	0.103962	-0.879469	-0.30409	0.644624	1.31893	-0.140237	-0.879469	0.158754	-0.284865	-0.879469	-0.423081	1.37266	-0.879469	-0.879469	-0.879469
COX17--NM-005694--chr3---	0.329875	-0.595895	-0.595895	1.26674	0.282218	-0.595895	-0.595895	1.39039	-0.595895	0.958038	-0.595895	-0.595895	-0.595895	-0.595895	1.71237	-0.595895	-0.595895	-0.595895	-0.595895	-0.595895	1.11396	0.317889	2	-0.595895	0.334437	-0.595895	0.168911	0.495112	0.623647	-0.595895	2	0.297693	2	-0.595895	1.79102	-0.595895	0.897764	-0.595895	-0.595895	-0.595895	0.280983	0.2826	0.283866	-0.595895	0.61636	2	0.318377	-0.595895	-0.595895
COX4I1--NM-001861--chr16--+	0.563133	0.000887256	1.02596	1.09057	-0.31614	1.79201	-0.0728723	0.274125	-0.946598	-0.602815	0.0624905	1.15058	0.535304	-0.0867797	0.507854	0.782733	1.26398	-1.48099	-1.48099	0.257865	0.654745	-0.581918	-0.620054	0.00696135	0.401446	-0.408751	-0.0110314	-0.093716	-1.48099	-1.48099	0.55233	0.163987	2	-0.535258	0.256144	-0.358381	-0.345269	1.19769	-1.48099	-0.427425	-0.317476	0.144082	-0.314357	-0.392725	0.76011	1.20748	-0.964307	-1.48099	1.38392
COX5B--NM-001862--chr2--+	0.567673	-0.288897	1.67825	0.480837	-0.475225	-1.00671	0.13786	1.12757	-0.434373	-0.0661787	-1.00671	0.714365	1.15276	-1.00671	0.798629	-1.00671	-1.00671	-1.00671	1.43089	0.182203	0.207985	0.281935	0.650234	-1.00671	0.806304	0.802263	0.353834	-0.346369	-0.268572	1.55779	2	0.258736	2	-1.00671	1.8923	0.570122	0.470697	0.660944	-1.00671	-1.00671	0.731462	0.241295	0.73555	0.15883	-0.598003	-1.00671	-0.043342	-1.00671	-1.00671
COX6A1--NM-004373--chr12--+	0.822659	-0.984407	-0.984407	0.309584	-0.984407	-0.984407	0.746585	-0.16736	-0.327482	-0.984407	0.912986	0.99103	-0.984407	-0.984407	0.619168	-0.984407	-0.984407	-0.984407	1.81345	0.8072	-0.295736	-0.984407	0.917421	0.844724	0.967833	0.33369	0.822606	-0.226472	0.439696	-0.984407	2	0.0990704	1.48065	0.178176	1.52921	-0.167275	0.0532547	1.47338	1.27528	-0.984407	-0.984407	0.752404	-0.373227	1.11791	0.432305	1.3305	0.49533	-0.984407	1.92434
COX6B1--NM-001863--chr19--+	1.65203	-0.888228	2	0.329973	-0.313923	1.35223	-0.16115	-0.119036	-0.26978	-0.888228	-0.888228	2	-0.888228	-0.888228	1.06256	-0.888228	0.869439	-0.888228	-0.888228	-0.128797	0.42433	0.152262	0.550523	0.833769	0.168971	0.746288	-0.000859044	-0.174686	-0.090621	-0.888228	2	0.76812	1.97478	-0.888228	1.47816	0.410961	-0.108621	1.12392	-0.888228	-0.172892	-0.888228	0.116434	-0.312845	1.09095	-0.095387	1.2911	0.50484	-0.888228	0.9759
COX6C--NM-004374--chr8---	0.0479938	0.713324	1.90493	1.63088	-0.432438	-1.00931	-0.278982	2	-0.388098	-1.00931	-1.00931	0.858738	-1.00931	-1.00931	-0.0900585	-1.00931	1.61172	-1.00931	2	0.281131	0.309116	-0.409004	0.227911	2	0.409882	0.632513	0.699469	-0.292578	-1.00931	0.890505	1.35436	0.902922	1.32175	-1.00931	0.558763	-0.236599	0.458388	0.644223	1.12754	-1.00931	-0.433249	0.633084	0.881733	-1.00931	0.549104	-1.00931	0.683486	-1.00931	-1.00931
COX7A2--NM-001865--chr6---	-1.00315	-1.00315	1.85094	1.76213	-0.438183	1.20087	0.21352	0.995	-1.00315	-1.00315	-0.199436	2	1.29234	-1.00315	1.54772	-1.00315	0.725932	-1.00315	-1.00315	1.24584	0.758479	0.0204191	1.04534	1.52087	0.676616	0.604783	1.21188	0.193671	0.721323	0.857449	1.31173	1.27136	2	-1.00315	0.974529	0.27491	0.434253	1.10129	1.08959	-1.00315	1.24362	-0.437937	0.32503	0.943844	0.523096	1.14073	0.0209039	0.851971	-1.00315
COX7A2L--NM-004718--chr2---	-0.481161	-0.481161	2	2	0.413695	-0.481161	0.651738	-0.481161	1.19007	-0.481161	-0.481161	2	-0.481161	2	-0.481161	-0.481161	-0.481161	-0.481161	2	-0.481161	0.0711874	0.450046	-0.481161	2	0.0345156	1.45234	-0.481161	-0.481161	-0.481161	-0.481161	2	0.429464	2	-0.481161	1.00164	-0.481161	-0.481161	1.18696	-0.481161	-0.481161	-0.481161	-0.481161	0.415374	-0.481161	0.206974	-0.481161	-0.481161	-0.481161	-0.481161
COX7B--NM-001866--chrX--+	0.767872	0.363458	2	0.671234	0.0500819	2	-0.984218	0.770453	-0.984218	-0.984218	-0.142791	2	-0.984218	0.677536	0.570572	-0.984218	-0.984218	-0.984218	2	-0.984218	1.24514	0.449881	0.49755	0.789266	-0.111483	-0.232553	0.529896	0.268763	-0.162763	1.86975	1.43929	-0.382318	2	-0.984218	0.623552	0.353816	0.204157	0.534703	-0.984218	-0.984218	0.402569	0.952699	-0.391631	1.05414	0.613648	-0.984218	-0.368386	-0.984218	0.935646
COX7C--NM-001867--chr5--+	-0.291488	-0.541964	0.565776	1.2988	0.456903	-1.24345	-0.585888	0.842287	0.548881	-1.24345	-0.504563	0.438482	0.866905	-1.24345	-0.415787	-1.24345	0.346173	-1.24345	1.13871	0.576523	0.244838	0.70309	0.967169	1.58697	0.173281	0.524381	-0.791075	0.737369	-0.522102	-1.24345	-1.24345	0.673859	1.34584	-1.24345	1.39105	0.297519	0.0780187	1.12382	-1.24345	-0.140739	1.11888	-0.723829	-0.0223956	-0.104419	0.765165	-1.24345	-0.702667	-1.24345	-1.24345
COX8A--NM-004074--chr11--+	0.333593	-0.837526	1.38821	1.85965	-0.198555	-0.837526	-0.0285806	1.42237	-0.837526	-0.837526	-0.837526	2	-0.837526	-0.837526	0.84211	-0.837526	-0.837526	-0.837526	-0.837526	1.70606	0.163017	0.320121	-0.0323688	1.07836	-0.160558	-0.025504	-0.281005	-0.837526	-0.837526	-0.837526	-0.837526	-0.187295	1.74446	-0.837526	0.899344	0.0183646	0.0298627	0.591642	-0.837526	-0.0416455	-0.837526	-0.198278	0.281694	-0.837526	0.888646	1.58718	0.320669	-0.837526	-0.837526
CP--NM-000096--chr3---	2	1.29043	-0.842613	0.835157	1.3441	-0.842613	0.858343	-0.039743	1.8439	0.21819	0.586241	1.6115	-0.842613	-0.842613	1.19359	-0.842613	0.992012	-0.842613	-0.842613	1.54365	2	0.610819	1.46586	1.83548	2	-0.0808148	0.933045	-0.0978298	0.987122	1.13156	2	2	1.8849	0.299797	0.150693	1.56476	2	1.11442	-0.842613	0.83651	1.7207	0.564983	1.72597	-0.842613	1.47558	-0.842613	1.78837	-0.842613	-0.842613
CP--NR-046371--chr3---	2	2	-0.64357	0.213391	1.61105	2	1.694	0.278846	0.642662	0.575185	0.336177	-0.64357	-0.64357	-0.64357	0.453891	-0.64357	-0.64357	-0.64357	-0.64357	1.76966	2	0.604186	1.3034	-0.64357	2	0.844513	2	0.815385	0.96419	-0.64357	-0.64357	1.63937	2	-0.64357	-0.64357	0.278942	2	1.12504	-0.64357	1.28557	0.971186	1.31722	1.31937	-0.64357	0.656879	-0.64357	2	-0.64357	-0.64357
CPS1--NM-001122634--chr2--+	1.74469	0.473612	-0.591563	0.389794	1.25972	-0.591563	-0.591563	2	1.78226	-0.591563	1.28834	-0.591563	-0.591563	-0.591563	-0.591563	-0.591563	-0.591563	-0.591563	2	-0.591563	-0.104751	0.229155	0.776708	-0.591563	1.93238	1.11253	1.74462	-0.591563	1.24958	-0.591563	-0.591563	0.211016	1.5023	-0.591563	2	1.19258	0.173049	0.15194	2	1.61761	1.98774	0.19746	0.198597	2	0.0149243	2	0.837994	-0.591563	-0.591563
CRYAB--NM-001289808--chr11---	-0.303628	-0.303628	2	-0.303628	-0.303628	2	-0.303628	-0.303628	-0.303628	-0.303628	-0.303628	-0.303628	-0.303628	-0.303628	-0.303628	-0.303628	-0.303628	-0.303628	-0.303628	-0.303628	-0.303628	-0.303628	0.260494	-0.303628	-0.303628	-0.303628	-0.303628	-0.303628	-0.303628	-0.303628	-0.303628	-0.303628	1.00348	-0.303628	-0.303628	-0.303628	-0.303628	-0.0212877	-0.303628	-0.303628	-0.303628	-0.303628	-0.303628	-0.303628	-0.303628	-0.303628	-0.303628	-0.303628	-0.303628
CST3--NM-000099--chr20---	0.618796	-0.620139	-0.620139	1.2718	0.0558332	2	0.235651	0.908901	0.642309	-0.620139	0.341491	-0.620139	-0.620139	-0.620139	0.457029	-0.620139	1.44868	-0.620139	-0.620139	0.273731	0.142968	0.0832926	-0.149846	-0.620139	-0.620139	0.840427	-0.0313909	-0.620139	0.318665	-0.620139	2	0.0677453	1.69656	-0.620139	0.499966	1.38536	-0.266105	-0.384759	1.88379	-0.620139	1.30171	0.562373	-0.620139	0.862257	-0.100323	-0.620139	-0.620139	-0.620139	-0.620139
CST7--NM-003650--chr20--+	-0.330686	-0.330686	-0.330686	-0.330686	-0.330686	-0.330686	-0.330686	-0.330686	-0.330686	-0.330686	-0.330686	-0.330686	-0.330686	-0.330686	-0.330686	-0.330686	-0.330686	-0.330686	-0.330686	-0.330686	-0.330686	-0.330686	-0.330686	-0.330686	-0.330686	-0.330686	-0.330686	-0.330686	-0.330686	-0.330686	-0.330686	-0.330686	-0.330686	-0.330686	-0.330686	-0.330686	-0.330686	-0.330686	-0.330686	-0.330686	-0.330686	-0.330686	-0.330686	-0.330686	-0.330686	-0.330686	-0.330686	-0.330686	-0.330686
CSTB--NM-000100--chr21---	-0.689818	0.309089	-0.689818	1.38025	-0.689818	-0.689818	-0.689818	0.300779	0.106645	-0.689818	-0.689818	-0.689818	-0.689818	-0.689818	-0.689818	-0.689818	1.57378	-0.689818	2	-0.689818	0.750355	-0.689818	-0.689818	1.52784	0.093778	-0.689818	0.452972	-0.689818	0.337373	1.74595	-0.689818	2	1.27377	-0.689818	0.535743	0.300882	0.0272252	0.688916	2	0.23142	0.0487553	1.0469	-0.689818	-0.689818	-0.121062	-0.689818	-0.689818	-0.689818	1.71088
CTSD--NM-001909--chr11---	0.72903	0.360451	-0.671802	0.279224	-0.671802	-0.671802	-0.671802	-0.671802	-0.671802	0.680731	0.415487	-0.671802	-0.671802	-0.671802	-0.671802	-0.671802	-0.671802	-0.671802	-0.671802	-0.671802	0.524997	-0.671802	-0.671802	1.61989	0.455944	-0.671802	0.509137	0.277803	0.389679	-0.671802	-0.671802	-0.671802	1.35734	-0.671802	0.594672	0.35197	-0.671802	1.03769	-0.671802	-0.671802	0.0914266	-0.671802	0.0939363	-0.671802	-0.0840601	-0.671802	0.713571	-0.671802	-0.671802
CXCR4--NM-003467--chr2---	-0.552423	-0.552423	-0.552423	0.436741	-0.552423	-0.552423	0.453999	-0.552423	-0.552423	-0.552423	-0.552423	-0.552423	-0.552423	-0.552423	-0.552423	-0.552423	-0.552423	-0.552423	-0.552423	-0.552423	-0.552423	-0.552423	0.000649497	-0.552423	-0.552423	-0.552423	-0.552423	-0.552423	-0.552423	-0.552423	-0.552423	-0.552423	-0.552423	-0.552423	-0.552423	-0.552423	-0.552423	-0.275613	-0.552423	-0.552423	-0.552423	-0.552423	-0.552423	-0.552423	-0.552423	-0.552423	-0.552423	-0.552423	-0.552423
CYB5A--NM-148923--chr18---	1.16047	-0.332745	2	1.71049	1.00003	-1.3561	0.379126	0.632924	0.781416	-0.561295	-0.285535	1.02564	0.468775	-0.0942504	1.03684	-1.3561	1.46149	-1.3561	0.703809	1.0547	1.25398	0.955631	1.1619	2	1.12253	0.870302	0.730545	0.537904	0.0148238	0.123041	2	1.02296	2	-0.500152	0.216118	0.447616	1.21114	1.50879	1.02969	0.359737	0.7987	0.282769	0.568404	0.587531	1.05056	1.07714	0.327728	-1.3561	2
CYCS--NM-018947--chr7---	-0.51887	0.625748	-0.51887	0.535679	-0.51887	-0.51887	-0.51887	-0.51887	-0.51887	-0.51887	-0.51887	-0.51887	-0.51887	-0.51887	0.831632	-0.51887	-0.51887	2	-0.51887	-0.51887	0.437877	-0.51887	0.0707614	-0.51887	0.731635	-0.51887	-0.51887	0.534103	-0.51887	-0.51887	-0.51887	0.343567	0.847348	-0.51887	1.78484	-0.51887	-0.0749997	-0.51887	-0.51887	-0.51887	-0.51887	-0.51887	-0.51887	1.33969	0.13285	-0.51887	-0.51887	-0.51887	-0.51887
CYP2A6--NM-000762--chr19---	1.64725	0.695669	0.971827	-0.271901	1.83209	1.20394	0.922299	0.6848	1.68054	-0.963089	1.98151	-0.963089	1.29388	0.597538	0.923759	-0.963089	-0.963089	-0.963089	-0.963089	1.67747	1.01856	1.47411	1.40111	0.702468	0.931781	0.617854	0.682328	-0.272934	0.732438	-0.963089	2	-0.397818	2	1.20013	-0.0426397	0.684935	0.921281	0.8504	1.9876	-0.963089	1.56335	1.24862	1.25069	0.255074	1.18507	2	0.0437745	0.860893	-0.963089
CYP2A7--NM-030589--chr19---	-0.22495	1.65084	2	0.738018	1.8435	-0.806885	1.54962	-0.0675964	0.223992	-0.806885	1.93797	0.317159	-0.806885	0.743899	-0.806885	-0.806885	0.882451	-0.806885	-0.806885	1.12725	1.0429	1.26176	1.31878	1.65912	0.698713	2	1.87204	0.362424	0.877948	-0.806885	2	-0.24518	2	0.883215	1.46751	1.14548	1.50997	0.328081	-0.806885	-0.119359	1.55343	0.48924	-0.806885	0.403595	0.235386	1.28771	-0.806885	1.00559	-0.806885
CYP2C9--NM-000771--chr10--+	1.95679	-0.662728	2	-0.662728	0.107867	-0.662728	1.52386	1.08035	0.167097	1.55285	0.433511	-0.662728	-0.662728	-0.662728	-0.662728	-0.662728	-0.662728	-0.662728	-0.662728	1.06106	1.54534	0.733387	1.94379	1.64782	1.43918	1.00229	0.00843326	1.91691	-0.662728	1.87507	-0.662728	0.121447	1.97827	-0.662728	2	-0.662728	1.10087	0.921753	2	-0.662728	1.52814	0.108202	1.14887	-0.662728	1.91153	2	0.139598	-0.662728	2
CYP2E1--NM-000773--chr10--+	-0.412766	-0.412766	-0.412766	2	0.398204	-0.412766	-0.412766	-0.412766	0.460538	2	0.74091	-0.412766	-0.412766	-0.412766	0.879522	-0.412766	2	-0.412766	-0.412766	-0.412766	1.44068	0.431147	0.609125	2	0.44643	-0.412766	0.29356	0.594819	-0.412766	2	-0.412766	2	1.74027	-0.412766	0.931034	-0.412766	-0.412766	2	-0.412766	2	-0.412766	-0.412766	-0.412766	-0.412766	0.210862	-0.412766	1.05719	-0.412766	2
DAD1--NM-001344--chr14---	1.53779	-0.701574	1.93171	0.239083	-0.701574	-0.701574	0.255495	-0.701574	0.112503	-0.701574	-0.701574	2	-0.701574	-0.701574	1.86629	-0.701574	-0.701574	2	-0.701574	-0.701574	0.482176	-0.701574	0.609951	2	-0.265932	-0.701574	0.466489	-0.701574	-0.701574	1.78806	2	0.0677188	-0.701574	0.739127	0.551091	1.00858	0.32464	1.35535	-0.701574	-0.701574	-0.701574	0.0547251	0.622583	2	-0.12024	-0.701574	0.668695	-0.701574	-0.701574
DBI--NM-001079862--chr2--+	0.404536	-0.21826	0.989476	2	-0.416788	1.2261	-0.983073	0.297857	-0.373261	0.019041	0.778244	0.850691	-0.983073	-0.983073	0.505498	-0.983073	1.58986	-0.983073	1.61413	1.27117	-0.0963451	0.389947	1.0702	-0.983073	0.56155	1.21048	0.466555	0.599991	-0.196604	1.74934	1.33722	1.29676	2	-0.983073	2	-0.224543	1.03944	1.85238	1.11456	-0.277727	0.00593421	0.629179	0.630944	0.258782	0.737326	1.16582	0.924914	0.876384	-0.983073
DCN--NM-001920--chr12---	-0.503242	-0.503242	-0.503242	-0.503242	-0.503242	-0.503242	-0.503242	-0.503242	-0.503242	-0.503242	-0.503242	-0.503242	-0.503242	-0.503242	-0.503242	-0.503242	-0.503242	-0.503242	-0.503242	-0.503242	-0.503242	-0.503242	-0.503242	-0.503242	-0.503242	0.415208	-0.503242	-0.503242	-0.503242	-0.503242	-0.503242	-0.503242	-0.503242	-0.503242	-0.503242	-0.503242	-0.503242	-0.503242	-0.503242	-0.503242	0.218459	-0.503242	-0.503242	-0.503242	-0.503242	-0.503242	-0.503242	-0.503242	-0.503242
DCN--NM-133503--chr12---	-0.566969	-0.566969	-0.566969	-0.566969	-0.566969	-0.566969	-0.566969	-0.566969	-0.566969	-0.566969	-0.566969	-0.566969	-0.566969	-0.566969	-0.566969	-0.566969	-0.566969	-0.566969	-0.566969	-0.566969	-0.566969	-0.566969	-0.566969	-0.566969	-0.224045	-0.566969	-0.566969	-0.566969	-0.566969	-0.566969	-0.566969	-0.566969	-0.566969	-0.566969	-0.566969	-0.566969	-0.566969	-0.566969	-0.566969	-0.566969	-0.566969	-0.566969	-0.566969	-0.566969	-0.566969	-0.566969	-0.566969	-0.566969	-0.566969
DCXR--NM-001195218--chr17---	0.329115	-0.570488	2	0.491268	0.921644	-0.570488	-0.570488	-0.570488	0.348392	1.88286	0.643397	1.16715	-0.570488	-0.570488	-0.570488	-0.570488	2	-0.570488	2	0.557862	-0.0437941	0.975455	0.504734	2	1.75699	1.85805	-0.570488	0.489681	-0.570488	-0.570488	-0.570488	0.297842	2	1.05569	-0.570488	-0.570488	1.14392	0.233926	-0.570488	0.492346	-0.570488	-0.570488	1.43552	-0.570488	0.0856859	-0.570488	2	-0.570488	-0.570488
DCXR--NM-016286--chr17---	1.04812	-0.739315	2	0.0115064	0.978058	-0.739315	0.972868	0.0688545	1.07686	0.32849	-0.739315	0.489458	1.71237	-0.739315	-0.739315	-0.739315	2	-0.739315	2	0.610483	0.435637	1.29297	-0.319507	2	1.05475	2	0.193019	1.80525	0.0987089	1.24788	2	1.00096	2	-0.739315	0.260548	0.625707	1.51782	0.902497	2	0.541753	-0.739315	-0.135646	1.23871	0.583947	0.0937015	1.55044	0.724344	-0.739315	1.21927
DDIT4--NM-019058--chr10--+	-0.527612	-0.527612	-0.527612	-0.527612	-0.527612	-0.527612	-0.527612	-0.527612	-0.527612	-0.527612	-0.527612	-0.527612	-0.527612	-0.527612	-0.527612	-0.527612	-0.527612	-0.527612	-0.527612	-0.527612	-0.527612	-0.527612	-0.527612	-0.527612	-0.527612	-0.527612	-0.527612	-0.527612	-0.527612	-0.527612	-0.527612	0.257852	-0.527612	-0.527612	-0.527612	-0.527612	-0.123357	-0.527612	-0.527612	-0.527612	-0.527612	-0.527612	-0.527612	-0.527612	-0.527612	-0.527612	0.871461	-0.527612	-0.527612
DDT--NM-001084392--chr22---	1.64774	1.08008	2	2	1.25501	-1.22075	0.149362	1.75682	0.172224	0.26522	0.919089	0.919881	1.0914	0.488539	0.92994	-1.22075	1.55151	-1.22075	1.33103	1.24268	0.580705	0.944034	1.38052	0.979006	1.08582	1.42803	1.40549	0.481517	1.2153	0.108652	0.433236	1.33735	2	-1.22075	1.86616	0.40037	0.90133	1.26182	0.274517	-0.0900318	0.505377	0.977986	1.19366	1.02443	1.29916	-1.22075	0.428661	0.104738	1.41303
DDX17--NM-006386--chr22---	-0.449284	-0.449284	-0.449284	-0.449284	-0.449284	-0.449284	-0.449284	-0.449284	-0.449284	-0.449284	-0.449284	-0.449284	-0.449284	-0.449284	-0.449284	-0.449284	-0.449284	-0.449284	-0.449284	-0.449284	-0.449284	1.26159	0.207711	-0.449284	-0.449284	-0.449284	0.373191	-0.449284	-0.449284	-0.449284	-0.449284	0.511683	-0.449284	-0.449284	-0.449284	-0.449284	-0.449284	1.49242	-0.449284	-0.449284	-0.449284	-0.449284	0.496814	-0.449284	1.33384	-0.449284	-0.449284	-0.449284	-0.449284
DDX24--NM-020414--chr14---	-0.609597	0.365858	-0.609597	-0.609597	-0.609597	-0.609597	-0.609597	-0.609597	-0.609597	-0.609597	-0.609597	-0.609597	-0.609597	-0.609597	0.541313	-0.609597	-0.609597	-0.609597	-0.609597	-0.609597	-0.16379	-0.609597	-0.107107	-0.609597	0.456096	-0.609597	-0.609597	-0.609597	-0.609597	-0.609597	-0.609597	0.673182	-0.609597	-0.609597	-0.609597	0.357844	-0.231326	0.875476	-0.609597	-0.609597	0.111636	0.112966	-0.609597	0.974284	-0.609597	-0.609597	0.142392	-0.609597	-0.609597
DDX46--NM-014829--chr5--+	-0.528245	-0.528245	-0.528245	-0.528245	0.282046	-0.528245	-0.528245	-0.528245	-0.528245	-0.528245	-0.528245	-0.528245	-0.528245	-0.528245	-0.528245	-0.528245	-0.528245	-0.528245	-0.528245	1.28434	0.740563	-0.528245	0.0354979	-0.528245	0.330231	1.22254	-0.528245	-0.528245	-0.528245	-0.528245	-0.528245	-0.528245	-0.528245	-0.528245	-0.528245	-0.528245	-0.528245	0.815973	-0.528245	-0.528245	-0.528245	-0.528245	-0.528245	-0.528245	0.590379	-0.528245	-0.528245	-0.528245	-0.528245
DDX5--NM-004396--chr17---	-0.156504	-0.794172	-0.794172	-0.794172	-0.18933	1.56542	-0.794172	-0.794172	-0.794172	0.944843	-0.794172	-0.794172	-0.794172	-0.794172	-0.794172	-0.794172	-0.794172	-0.794172	-0.794172	-0.794172	-0.420834	-0.16476	-0.794172	-0.794172	-0.153362	-0.0255212	-0.267375	-0.0426893	-0.794172	-0.794172	-0.794172	0.280082	0.180867	-0.794172	0.208069	0.0160044	-0.794172	0.449492	1.44628	0.489944	-0.794172	-0.794172	-0.188194	-0.794172	-0.794172	-0.794172	0.672969	-0.794172	-0.794172
DECR1--NM-001359--chr8--+	1.54698	0.578354	2	1.25704	2	2	0.503874	0.568459	0.337283	-0.611147	0.641774	-0.611147	2	-0.611147	1.704	2	-0.611147	-0.611147	-0.611147	-0.611147	0.383116	-0.611147	0.00160534	2	1.01014	1.29185	1.23418	1.2546	-0.611147	2	2	0.285108	1.7271	-0.611147	0.848254	-0.611147	1.15839	1.50871	2	-0.611147	0.268348	0.26997	0.931545	1.32029	-0.611147	-0.611147	0.985267	-0.611147	-0.611147
DEFB1--NM-005218--chr8---	-0.526104	-0.526104	-0.526104	1.10181	-0.526104	-0.526104	-0.526104	-0.526104	-0.526104	-0.526104	-0.526104	-0.526104	-0.526104	-0.526104	-0.526104	-0.526104	1.82271	-0.526104	-0.526104	-0.526104	0.340282	-0.526104	0.0078393	-0.526104	-0.0838422	-0.526104	-0.526104	-0.526104	-0.526104	2	2	1.30118	0.71108	-0.526104	-0.526104	-0.526104	-0.124155	2	-0.526104	-0.526104	-0.526104	0.241688	-0.526104	-0.526104	-0.526104	-0.526104	1.33549	-0.526104	1.96498
DHRS3--NM-004753--chr1---	0.183698	-0.630019	2	0.33037	0.14181	-0.630019	0.347126	0.403725	1.69308	0.73583	1.20972	-0.630019	2	1.53843	-0.630019	-0.630019	1.73217	-0.630019	-0.630019	0.390606	0.872883	0.173163	1.30357	1.68423	-0.185239	0.350842	0.562546	0.328935	-0.630019	1.91184	2	0.155411	0.61421	-0.630019	0.648923	0.403832	0.417721	0.956999	-0.630019	0.331345	0.140724	-0.630019	0.721915	-0.630019	0.435507	-0.630019	1.9705	-0.630019	-0.630019
DNAJA1--NM-001539--chr9--+	-0.0756905	-0.696471	-0.696471	-0.696471	0.333191	2	-0.696471	-0.696471	-0.062388	-0.696471	-0.696471	-0.696471	-0.696471	-0.696471	1.96213	-0.696471	-0.696471	-0.696471	-0.696471	-0.696471	-0.0317459	-0.0837275	-0.286809	-0.696471	-0.0726315	0.0518235	-0.183626	0.949602	0.1213	-0.696471	-0.696471	-0.696471	0.252745	-0.696471	-0.696471	1.38622	-0.388081	0.0106647	-0.696471	0.0369488	-0.696471	-0.107391	-0.696471	-0.696471	-0.696471	1.53795	-0.0834008	-0.696471	-0.696471
DNAJB1--NM-001300914--chr19---	-0.440886	-0.440886	-0.440886	-0.440886	-0.440886	-0.440886	-0.440886	-0.440886	-0.440886	-0.440886	-0.440886	-0.440886	-0.440886	-0.440886	0.846918	-0.440886	-0.440886	-0.440886	-0.440886	-0.440886	-0.440886	-0.440886	-0.440886	-0.440886	-0.440886	-0.440886	-0.440886	-0.440886	-0.440886	-0.440886	-0.440886	-0.440886	-0.440886	-0.440886	-0.440886	-0.440886	-0.440886	-0.440886	-0.440886	-0.440886	-0.440886	-0.440886	-0.440886	-0.440886	0.180578	-0.440886	-0.440886	-0.440886	-0.440886
DNAJB1--NM-006145--chr19---	-0.617489	-0.617489	-0.617489	-0.617489	-0.617489	2	-0.617489	-0.00686508	-0.617489	-0.617489	-0.617489	-0.617489	-0.617489	-0.617489	1.63879	-0.617489	-0.617489	-0.617489	-0.617489	-0.617489	-0.336078	-0.617489	-0.617489	-0.617489	-0.617489	-0.617489	-0.617489	-0.617489	-0.617489	-0.617489	-0.617489	-0.617489	-0.617489	-0.617489	-0.617489	-0.617489	-0.378709	-0.617489	-0.617489	-0.617489	-0.617489	-0.617489	-0.617489	0.953687	-0.617489	-0.617489	-0.617489	-0.617489	-0.617489
DNASE1L3--NM-004944--chr3---	-0.343791	-0.343791	-0.343791	-0.343791	-0.343791	-0.343791	-0.343791	-0.343791	-0.343791	-0.343791	-0.343791	1.51868	-0.343791	-0.343791	-0.343791	-0.343791	-0.343791	-0.343791	-0.343791	-0.343791	-0.343791	-0.343791	-0.343791	-0.343791	-0.343791	-0.343791	-0.343791	-0.343791	-0.343791	-0.343791	-0.343791	0.58692	-0.343791	-0.343791	-0.343791	-0.343791	-0.343791	-0.0253215	-0.343791	-0.343791	-0.343791	-0.343791	-0.343791	-0.343791	-0.343791	-0.343791	-0.343791	-0.343791	-0.343791
DRAP1--NM-006442--chr11--+	-0.5752	-0.5752	-0.5752	0.40864	0.215475	-0.5752	-0.5752	-0.5752	-0.5752	-0.5752	-0.5752	-0.5752	-0.5752	-0.5752	-0.5752	-0.5752	1.84467	-0.5752	-0.5752	-0.5752	-0.5752	-0.5752	-0.5752	1.79556	-0.11956	-0.5752	-0.5752	-0.5752	-0.5752	2	2	-0.5752	0.699411	-0.5752	-0.5752	0.483896	-0.161092	0.170183	-0.5752	-0.5752	-0.5752	-0.5752	0.216959	-0.5752	0.032821	-0.5752	0.248033	-0.5752	-0.5752
DSTN--NM-006870--chr20--+	0.299819	-0.575519	-0.575519	0.457599	-0.575519	-0.575519	-0.575519	1.30256	-0.575519	-0.575519	-0.575519	-0.575519	2	-0.575519	-0.575519	-0.575519	-0.575519	-0.575519	-0.575519	1.28178	-0.0630312	0.288487	-0.575519	-0.575519	-0.575519	-0.575519	0.707357	-0.575519	-0.575519	-0.575519	-0.575519	-0.575519	0.762933	-0.575519	-0.575519	-0.575519	-0.575519	0.207198	-0.575519	-0.575519	-0.575519	0.255119	-0.575519	2	-0.575519	-0.575519	-0.575519	-0.575519	-0.575519
DUSP1--NM-004417--chr5---	0.0301761	0.241282	-0.720946	-0.720946	-0.720946	2	-0.720946	-0.720946	0.0462716	0.539835	-0.720946	-0.720946	-0.720946	-0.720946	1.15186	-0.720946	-0.720946	-0.720946	-0.720946	-0.720946	-0.720946	0.0204516	0.515085	-0.720946	-0.720946	0.184463	0.379882	0.164241	0.268527	1.62538	-0.720946	0.00406516	-0.720946	-0.720946	-0.720946	0.233377	0.246197	2	1.91813	0.166465	-0.00949223	-0.720946	-0.00715281	0.841459	-0.173074	-0.720946	-0.720946	-0.720946	-0.720946
DYNLL1--NM-003746--chr12--+	0.292922	0.00229483	1.2876	1.48908	-0.811644	-0.811644	-0.811644	-0.811644	0.313884	-0.811644	-0.811644	0.415606	-0.811644	-0.811644	-0.811644	-0.811644	-0.811644	-0.811644	-0.811644	0.53648	0.13204	0.280215	-0.392357	-0.811644	0.493983	-0.811644	0.451054	-0.811644	0.0253411	1.17309	2	-0.198365	1.62361	-0.811644	0.186979	-0.811644	-0.227376	0.0553793	-0.811644	-0.811644	0.901766	0.242618	-0.811644	1.26525	0.0203399	-0.811644	-0.184169	-0.811644	1.14452
ECH1--NM-001398--chr19---	0.134612	0.363197	-0.678702	1.48046	1.51693	-0.678702	0.297959	-0.678702	0.762054	-0.678702	-0.678702	-0.678702	2	-0.678702	-0.678702	2	-0.678702	-0.678702	-0.678702	0.341418	0.823456	0.718955	-0.141984	2	-0.234142	-0.678702	-0.00679913	0.279777	-0.678702	-0.678702	-0.678702	-0.678702	0.564911	-0.678702	-0.678702	-0.678702	-0.678702	1.1781	-0.678702	-0.678702	0.0916591	0.0930794	0.672562	-0.678702	-0.0854674	-0.678702	0.12451	-0.678702	1.82532
ECHS1--NM-004092--chr10---	1.03624	0.796962	1.08487	0.688485	1.18016	-0.932374	0.314771	1.11583	0.810691	0.0924466	1.20736	0.246934	-0.932374	-0.932374	1.03476	-0.932374	2	-0.932374	1.72368	0.768429	0.727033	1.23797	0.873063	1.65488	1.55106	1.31089	0.988428	-0.212854	-0.932374	2	1.44049	0.987298	1.95462	0.840821	0.641799	0.3777	1.41462	1.75325	1.21279	-0.211046	1.17814	0.0807044	0.429075	1.96771	0.632103	-0.932374	1.91465	-0.932374	0.947372
EDF1--NM-003792--chr9---	-0.517377	0.507611	0.77138	0.0486809	0.660167	-1.07673	0.724074	-1.07673	0.520189	0.448714	-0.321962	1.09536	-1.07673	0.413882	-1.07673	1.34352	0.547058	-1.07673	2	0.782358	0.701279	0.479541	0.423158	1.81452	0.228528	0.433287	1.00341	0.406466	0.849836	-1.07673	1.09718	1.05928	2	-1.07673	1.10942	0.123501	0.513971	1.42493	0.888571	0.702658	-0.150116	-0.545941	-0.147401	1.21927	0.535137	0.936598	-1.07673	-1.07673	-1.07673
EEF1A1--NM-001402--chr6---	-0.0721042	-1.2695	-2	0.695156	-1.23868	1.01269	-0.769825	0.131771	0.41309	-1.00227	-0.63516	-0.456403	-2	-2	-1.57629	-0.246916	-0.919255	-2	1.03041	-0.507098	-0.291242	-0.460568	0.325031	-0.28906	-0.673886	-0.765586	-0.963311	-0.0997755	-0.446443	-2	-0.454862	-0.229592	-0.252136	-0.54581	0.304843	-0.961209	-0.690377	1.04335	0.555381	-0.787904	0.147112	-0.823317	0.459493	-0.351805	0.645372	-2	0.0159595	-0.134122	-0.154436
EEF1B2--NM-001959--chr2--+	-0.0268566	-0.538458	-1.16672	0.796865	-0.0747966	0.648027	0.153241	0.213281	-1.16672	-1.16672	-0.504961	0.339642	-1.16672	-1.16672	0.413394	-1.16672	-1.16672	-1.16672	-1.16672	-1.16672	-0.103564	-0.323936	0.898611	0.228077	-0.480338	-0.575556	-0.761565	-0.181284	-0.520669	0.365258	-1.16672	-0.0591445	-0.416825	-1.16672	0.46166	-0.543619	-0.375455	0.66189	-1.16672	-0.587308	-0.354292	0.157678	-1.16672	-0.146587	-0.288346	0.598505	-1.16672	-1.16672	-1.16672
EEF1D--NM-001130056--chr8---	-0.178259	0.00498993	-0.830266	1.53072	0.251189	1.58238	-0.0473093	1.35702	-0.830266	-0.830266	0.049523	0.429125	-0.830266	-0.830266	-0.830266	-0.830266	1.06248	-0.830266	-0.830266	0.553166	-0.448533	-0.830266	-0.0509758	-0.830266	-0.473877	-0.830266	0.1253	-0.0618857	-0.830266	-0.830266	-0.830266	0.642221	0.811631	-0.830266	0.194511	-0.830266	0.585111	0.552987	-0.830266	-0.0599545	-0.830266	-0.211555	0.623634	-0.830266	0.0235076	-0.830266	-0.186358	-0.830266	-0.830266
EEF1D--NM-001960--chr8---	0.480202	-0.137786	-0.896696	-0.197504	-0.334782	-0.896696	0.313403	1.09066	0.152737	-0.896696	-0.896696	0.247581	-0.896696	-0.896696	-0.00128066	-0.896696	-0.896696	-0.896696	1.68046	-0.896696	-0.549855	0.465726	0.511012	0.788148	0.137693	-0.896696	-0.407288	-0.198549	-0.896696	-0.896696	-0.896696	0.723915	0.00913985	-0.896696	0.630716	-0.144021	-0.35193	0.632218	2	-0.196794	-0.335572	0.0862891	-0.896696	-0.896696	0.810423	-0.896696	-0.896696	-0.896696	-0.896696
EEF1G--NM-001404--chr11---	-0.350439	-0.585395	0.453708	0.616592	-0.756203	0.657296	-0.194184	-0.141341	-0.0288939	-1.24342	-1.24342	0.751218	-1.24342	-1.24342	0.0373073	0.979105	0.247713	-1.24342	-1.24342	0.46379	0.0181964	-0.736411	-0.629485	-1.24342	0.604757	-1.24342	-0.490613	-0.63808	1.30294	0.361132	-1.24342	-0.747617	0.72535	-1.24342	0.0809481	-1.24342	-0.582034	0.977175	-1.24342	-0.20903	-0.101082	-0.755991	-0.0980192	-1.24342	0.753898	0.605428	-0.0615984	-1.24342	-1.24342
EEF2--NM-001961--chr19---	-0.7274	0.215948	-0.7274	0.754189	-0.0289234	1.99747	0.156881	0.852545	-0.7274	-0.7274	0.266244	1.53443	-0.7274	-0.7274	-0.7274	-0.7274	-0.7274	-0.7274	-0.7274	-0.7274	-0.7274	-0.000549738	0.484378	-0.7274	0.0126125	0.160244	-0.119051	0.75225	-0.7274	-0.7274	-0.7274	0.513157	0.398582	-0.7274	-0.7274	-0.7274	0.220767	0.431325	-0.7274	-0.7274	0.492477	-0.7274	-0.0276126	-0.7274	0.236862	-0.7274	-0.000162163	-0.7274	-0.7274
EID1--NM-014335--chr15--+	-0.696641	-0.696641	-0.696641	0.17757	-0.696641	2	-0.696641	0.244343	0.0599313	1.32336	0.978011	-0.696641	-0.696641	-0.696641	1.15018	-0.696641	-0.696641	-0.696641	-0.696641	-0.696641	-0.26298	-0.696641	-0.207842	-0.696641	1.03179	-0.696641	-0.696641	-0.696641	-0.696641	-0.696641	-0.696641	-0.696641	0.43594	-0.696641	-0.696641	-0.696641	0.911272	0.74797	-0.696641	-0.696641	0.00494123	-0.696641	-0.696641	-0.696641	-0.156371	-0.696641	0.0348595	-0.696641	-0.696641
EIF1--NM-005801--chr17--+	0.159371	-0.581547	-1.87309	0.106391	-1.11677	-0.185797	-0.941669	0.465572	-0.380592	-1.87309	-1.25781	0.792142	-0.11577	-1.87309	0.707561	0.099879	0.0920264	-1.87309	0.861004	-0.905584	-0.0116701	-1.0895	0.699676	0.0591812	-0.0858614	0.711326	-0.0641732	-0.664	-1.27241	-0.448706	1.08249	-0.00167426	0.283046	-1.87309	0.32069	0.199376	0.166143	1.17477	-0.270991	-0.954848	-0.85902	-0.151008	-0.01983	-0.00141083	0.565695	0.470076	-0.415834	-1.87309	0.189185
EIF3E--NM-001568--chr8---	-0.636428	-0.636428	-0.636428	0.342176	-0.636428	-0.636428	1.05725	-0.636428	0.210489	-0.636428	-0.636428	2	-0.636428	-0.636428	-0.636428	-0.636428	-0.636428	-0.636428	2	-0.636428	-0.636428	-0.636428	-0.0892602	-0.636428	-0.636428	-0.636428	-0.636428	-0.636428	0.455834	-0.636428	-0.636428	-0.636428	1.45156	-0.636428	-0.636428	-0.636428	-0.224524	0.668268	-0.636428	0.343169	-0.636428	-0.636428	0.151515	-0.636428	-0.0316428	-0.636428	0.182424	1.94602	-0.636428
EIF3G--NM-003755--chr19---	0.163933	-0.64546	-0.64546	-0.64546	0.122267	-0.64546	-0.64546	0.382791	-0.64546	-0.64546	-0.64546	0.917933	-0.64546	-0.64546	-0.64546	-0.64546	-0.64546	-0.64546	2	-0.64546	0.556699	0.153454	-0.11133	1.65649	-0.203043	-0.64546	-0.64546	0.308398	-0.64546	-0.64546	-0.64546	0.135796	-0.64546	-0.64546	-0.64546	0.382898	-0.243371	0.628147	-0.64546	-0.64546	-0.64546	-0.64546	0.123708	-0.64546	-0.64546	-0.64546	0.746118	-0.64546	-0.64546
EIF3H--NM-003756--chr8---	-0.574158	-0.574158	-0.574158	-0.574158	-0.574158	-0.574158	-0.574158	-0.574158	-0.574158	-0.574158	-0.574158	-0.574158	-0.574158	-0.574158	-0.574158	-0.574158	-0.574158	-0.574158	-0.574158	-0.574158	-0.00126899	-0.574158	-0.574158	-0.574158	0.409168	-0.574158	0.234214	0.578995	-0.574158	-0.574158	-0.574158	-0.574158	-0.574158	-0.574158	-0.574158	-0.574158	0.325652	0.965552	-0.574158	-0.574158	-0.574158	0.354378	-0.574158	-0.574158	0.139567	-0.574158	0.392193	-0.574158	-0.574158
EIF3K--NM-013234--chr19--+	-0.783325	0.104806	-0.783325	1.05718	-0.783325	1.78205	-0.783325	-0.783325	-0.0751882	-0.783325	-0.783325	-0.783325	-0.783325	-0.783325	-0.783325	-0.783325	-0.783325	-0.783325	-0.783325	-0.783325	-0.0409674	0.408059	-0.325819	2	-0.086628	0.0523619	-0.783325	0.0336965	-0.783325	1.38232	-0.783325	-0.783325	0.276749	-0.783325	0.306324	0.097509	0.109342	0.687493	1.65252	0.03575	-0.783325	-0.783325	-0.783325	0.658765	0.124496	-0.783325	-0.783325	-0.783325	1.35114
EIF4A1--NM-001204510--chr17--+	-0.63777	-0.63777	-0.63777	-0.63777	-0.63777	-0.63777	-0.63777	0.302047	-0.63777	-0.63777	-0.63777	-0.63777	-0.63777	-0.63777	1.20676	-0.63777	-0.63777	-0.63777	-0.63777	-0.63777	-0.204647	-0.63777	-0.63777	-0.63777	-0.63777	-0.63777	-0.63777	-0.63777	-0.63777	-0.63777	-0.63777	-0.63777	0.493408	-0.63777	-0.63777	-0.63777	-0.63777	0.526302	1.96146	-0.63777	-0.63777	-0.63777	-0.63777	-0.63777	-0.63777	-0.63777	-0.63777	-0.63777	-0.63777
EIF4A1--NM-001416--chr17--+	0.435147	-0.520317	2	-0.520317	-0.520317	2	-0.520317	-0.520317	-0.520317	-0.520317	-0.520317	-0.520317	-0.520317	-0.520317	-0.520317	-0.520317	-0.520317	-0.520317	-0.520317	-0.520317	-0.520317	-0.520317	-0.520317	2	0.00194239	-0.520317	0.87999	0.605684	-0.520317	-0.520317	2	-0.520317	1.88575	-0.520317	-0.520317	-0.520317	-0.0456626	1.1691	-0.520317	-0.520317	0.384687	0.386356	0.387663	-0.520317	0.176602	-0.520317	0.42328	2	-0.520317
EIF4G2--NM-001042559--chr11---	-0.513684	-0.513684	-0.513684	-0.513684	-0.513684	2	0.639464	-0.513684	-0.513684	-0.513684	1.65742	-0.513684	-0.513684	-0.513684	0.937763	-0.513684	-0.513684	-0.513684	-0.513684	-0.513684	-0.513684	-0.513684	-0.513684	-0.513684	-0.513684	0.643849	-0.513684	-0.513684	-0.513684	-0.513684	-0.513684	1.10407	-0.513684	-0.513684	-0.513684	-0.513684	-0.0366362	0.0876292	-0.513684	-0.513684	-0.513684	-0.513684	-0.513684	-0.513684	0.18675	-0.513684	0.434672	-0.513684	-0.513684
EIF5--NM-001969--chr14--+	-0.547341	-0.547341	-0.547341	-0.547341	0.40481	-0.547341	-0.547341	-0.547341	-0.547341	2	-0.547341	2	-0.547341	-0.547341	-0.547341	-0.547341	-0.547341	-0.547341	-0.547341	0.711733	-0.547341	0.443488	0.65245	-0.547341	-0.547341	0.662679	0.281949	0.635653	-0.547341	-0.547341	-0.547341	-0.547341	1.98052	-0.547341	-0.547341	1.60661	-0.0486616	0.822484	2	-0.547341	-0.547341	-0.547341	1.12044	-0.547341	0.767124	-0.547341	0.444017	-0.547341	-0.547341
EIF5B--NM-015904--chr2--+	-0.47726	-0.47726	-0.47726	0.680672	0.453326	-0.47726	-0.47726	-0.47726	-0.47726	-0.47726	0.846581	1.41778	-0.47726	-0.47726	-0.47726	-0.47726	-0.47726	-0.47726	-0.47726	0.753298	0.573281	0.491129	-0.47726	-0.47726	0.895838	1.53345	-0.47726	0.678941	0.815157	-0.47726	-0.47726	-0.47726	-0.47726	-0.47726	-0.47726	1.62791	0.0101248	0.40002	-0.47726	-0.47726	-0.47726	-0.47726	0.455073	1.5635	0.238351	-0.47726	-0.47726	-0.47726	-0.47726
EMP3--NM-001425--chr19--+	-0.387604	-0.387604	-0.387604	-0.387604	-0.387604	-0.387604	-0.387604	-0.387604	-0.387604	-0.387604	-0.387604	-0.387604	-0.387604	-0.387604	-0.387604	-0.387604	-0.387604	-0.387604	-0.387604	-0.387604	-0.387604	-0.387604	-0.387604	-0.387604	-0.387604	-0.387604	-0.387604	-0.387604	-0.387604	-0.387604	-0.387604	-0.387604	-0.387604	-0.387604	-0.387604	-0.387604	-0.387604	-0.387604	-0.387604	-0.387604	-0.387604	-0.387604	-0.387604	-0.387604	-0.387604	-0.387604	-0.387604	-0.387604	-0.387604
ENG--NM-001278138--chr9---	-0.349959	-0.349959	-0.349959	-0.349959	-0.349959	-0.349959	-0.349959	-0.349959	-0.349959	-0.349959	-0.349959	-0.349959	-0.349959	-0.349959	1.06117	-0.349959	-0.349959	-0.349959	-0.349959	-0.349959	-0.349959	-0.349959	-0.349959	-0.349959	-0.349959	-0.349959	0.421324	-0.349959	-0.349959	-0.349959	-0.349959	-0.349959	-0.349959	-0.349959	-0.349959	-0.349959	-0.349959	-0.349959	-0.349959	-0.349959	0.534345	-0.349959	-0.349959	-0.349959	-0.349959	-0.349959	-0.349959	-0.349959	-0.349959
ENO1--NM-001428--chr1---	0.290039	-0.604737	-0.604737	-0.604737	-0.604737	-0.604737	0.469748	1.31505	0.309213	0.897173	-0.604737	-0.604737	-0.604737	-0.604737	1.62625	-0.604737	-0.604737	-0.604737	-0.604737	-0.604737	-0.0808689	0.278455	-0.0142613	1.94005	0.647559	-0.604737	1.1735	-0.604737	1.37656	-0.604737	-0.604737	-0.604737	-0.604737	-0.604737	0.801609	-0.604737	0.547376	0.977376	-0.604737	-0.604737	-0.604737	0.879964	-0.604737	-0.604737	-0.604737	-0.604737	0.93364	-0.604737	-0.604737
ENY2--NM-020189--chr8--+	0.389626	-0.559521	-0.559521	-0.559521	0.340766	-0.559521	-0.559521	2	1.12186	1.03365	-0.559521	-0.559521	-0.559521	-0.559521	1.80703	-0.559521	-0.559521	-0.559521	-0.559521	0.630971	0.850209	0.377338	1.37133	-0.559521	-0.559521	-0.559521	0.224597	-0.559521	-0.559521	-0.559521	-0.559521	-0.559521	-0.559521	-0.559521	1.88767	-0.559521	0.662599	-0.246033	-0.559521	-0.559521	0.339499	1.0154	-0.559521	-0.559521	0.683345	-0.559521	-0.559521	-0.559521	-0.559521
EPHX1--NM-001136018--chr1--+	-0.552127	-0.552127	2	2	1.43207	-0.552127	0.518042	-0.552127	-0.552127	1.87826	0.650395	1.16925	-0.552127	1.82276	-0.552127	-0.552127	-0.552127	-0.552127	2	0.565661	0.402141	0.979345	0.51303	1.98244	1.00394	-0.552127	0.75397	0.498118	-0.552127	-0.552127	2	0.949212	2	-0.552127	-0.552127	0.580146	0.885727	0.463025	2	1.81566	-0.552127	1.43277	-0.552127	-0.552127	1.04402	-0.552127	0.980071	-0.552127	-0.552127
ERP29--NM-006817--chr12--+	0.307506	1.99865	-0.615386	1.24146	-0.615386	-0.615386	-0.615386	-0.615386	0.327283	-0.615386	0.629925	2	-0.615386	-0.615386	2	-0.615386	-0.615386	-0.615386	-0.615386	-0.615386	0.755349	0.970579	-0.00635624	-0.615386	0.312054	-0.615386	0.147043	-0.615386	-0.615386	-0.615386	-0.615386	0.275424	0.79578	-0.615386	0.83515	0.557176	1.14341	-0.037486	-0.615386	-0.615386	0.913456	0.260378	0.261641	-0.615386	0.0577753	-0.615386	0.296044	-0.615386	-0.615386
ETFB--NM-001985--chr19---	1.31741	0.864559	1.64656	0.112035	0.491634	1.04407	0.487131	-0.297344	1.34801	0.506833	0.249451	0.0676423	-0.998649	0.472456	-0.164259	-0.998649	2	-0.998649	1.40286	0.172664	1.49239	0.27092	0.772474	1.85476	0.558183	0.783545	0.552383	0.110581	0.223716	0.725782	2	-0.998649	2	-0.00075733	0.424666	0.853407	1.40666	1.34496	2	-0.346448	-0.0841596	-0.998649	0.493758	0.149637	0.217372	0.988331	1.14088	-0.998649	0.700954
F12--NM-000505--chr5---	-0.573037	2	-0.573037	-0.573037	0.303554	-0.573037	1.31473	0.601019	-0.573037	-0.573037	0.67399	-0.573037	2	1.88974	-0.573037	-0.573037	-0.573037	-0.573037	2	2	1.43039	-0.573037	0.947749	-0.573037	0.72039	-0.573037	0.781398	0.516078	0.64439	2	-0.573037	1.51409	0.840074	-0.573037	-0.573037	-0.573037	0.276803	0.00566001	2	0.518815	0.957913	0.303934	0.962398	1.34931	-0.573037	2	0.339649	-0.573037	-0.573037
F2--NM-001311257--chr11--+	2	0.57478	1.29837	0.480296	2	1.54933	0.910525	0.0107434	0.703478	-0.793643	0.637909	-0.793643	1.64657	-0.793643	-0.793643	-0.793643	-0.793643	2	2	2	1.58354	0.662534	0.710937	1.00714	1.37347	-0.030406	0.134327	0.478628	1.03955	1.18425	-0.793643	1.19718	1.63322	-0.793643	-0.793643	1.33064	1.12924	0.441262	-0.793643	0.481428	1.59477	1.77747	0.618269	0.523425	0.828822	2	0.294969	-0.793643	1.15578
FABP1--NM-001443--chr2---	1.65493	0.486474	2	2	0.569544	-0.781698	0.710147	1.20171	0.544514	0.138571	-0.165196	1.66147	1.50133	0.45022	1.0913	-0.486412	1.21876	0.581075	1.97601	1.44317	2	1.34809	1.04628	1.62664	1.21777	0.794948	2	0.474894	0.042573	1.41368	2	0.805297	2	-0.962766	1.83367	1.33017	1.82012	0.785473	1.64281	0.0945656	0.392189	0.722829	0.859901	0.0493796	0.830856	1.19674	0.964874	-0.139975	1.05751
FABP4--NM-001442--chr8---	-0.658271	-0.658271	-0.658271	-0.658271	-0.658271	-0.658271	-0.102411	-0.0702145	-0.658271	0.118707	-0.658271	-0.658271	-0.658271	0.575278	-0.658271	1.34459	-0.658271	-0.658271	-0.658271	-0.658271	-0.658271	-0.658271	-0.105014	-0.658271	0.149971	0.290409	-0.658271	-0.658271	-0.658271	-0.658271	1.14074	-0.658271	-0.658271	-0.658271	-0.658271	-0.0701532	-0.232607	-0.130988	-0.658271	-0.658271	-0.658271	-0.658271	-0.658271	-0.658271	-0.320636	-0.658271	-0.658271	-0.658271	-0.658271
FABP5--NM-001444--chr8--+	-0.333887	-0.333887	-0.333887	-0.333887	-0.333887	-0.333887	-0.333887	0.7548	-0.333887	-0.333887	-0.333887	-0.333887	-0.333887	-0.333887	-0.333887	-0.333887	-0.333887	-0.333887	-0.333887	-0.333887	-0.333887	-0.333887	-0.333887	-0.333887	-0.333887	-0.333887	-0.333887	-0.333887	-0.333887	-0.333887	-0.333887	-0.333887	-0.333887	-0.333887	-0.333887	-0.333887	-0.333887	-0.333887	-0.333887	0.678573	-0.333887	-0.333887	-0.333887	-0.333887	-0.333887	-0.333887	-0.333887	-0.333887	-0.333887
FAM162A--NM-014367--chr3--+	1.16657	0.708998	2	-0.572496	1.08673	-0.572496	-0.572496	0.698338	-0.572496	-0.572496	-0.572496	-0.572496	-0.572496	-0.572496	-0.572496	-0.572496	-0.572496	-0.572496	-0.572496	1.55004	0.498661	1.14657	1.80456	2	-0.572496	-0.572496	0.253917	2	0.745283	2	-0.572496	-0.572496	2	-0.572496	0.999772	0.69847	1.3339	0.0539027	-0.572496	-0.572496	1.08465	0.376764	0.378133	1.50831	-0.572496	-0.572496	0.415423	-0.572496	-0.572496
FAU--NM-001997--chr11---	-0.046868	-1.28559	0.0835542	0.549219	-0.312744	0.264589	-1.78519	0.215019	-0.240508	-0.721622	-1.25895	-0.587313	-0.28219	-1.78519	-0.812804	-1.78519	-0.653055	-1.78519	0.957234	-0.0267399	-0.0785245	-1.115	0.664192	0.90569	-0.0916871	-0.352284	0.0101308	-0.225255	-0.921633	-1.78519	1.03307	0.00926551	0.941496	-1.78519	0.572925	-0.948366	-0.132673	0.967917	0.850227	-1.32443	-0.437078	-0.573817	-0.730859	0.272264	0.141273	0.21887	-0.699692	-1.78519	0.628368
FBP1--NM-001127628--chr9---	1.64566	1.49247	-0.53831	1.35225	1.55381	-0.53831	-0.53831	-0.53831	1.12625	2	0.729615	2	-0.53831	-0.53831	-0.53831	-0.53831	-0.53831	-0.53831	-0.53831	2	0.467859	0.389177	-0.53831	-0.53831	-0.53831	0.594355	-0.53831	1.95329	-0.53831	-0.53831	-0.53831	1.58379	1.82794	-0.53831	-0.53831	-0.53831	0.671584	0.0500848	2	0.57184	0.351717	0.353358	1.02286	-0.53831	0.147076	-0.53831	1.07722	-0.53831	-0.53831
FCER1G--NM-004106--chr1--+	-0.355793	-0.355793	-0.355793	-0.355793	-0.355793	-0.355793	-0.355793	0.653837	-0.355793	-0.355793	-0.355793	-0.355793	-0.355793	-0.355793	-0.355793	-0.355793	-0.355793	-0.355793	-0.355793	-0.355793	-0.355793	-0.355793	-0.355793	-0.355793	-0.355793	-0.355793	-0.355793	-0.355793	-0.355793	-0.355793	-0.355793	-0.355793	-0.355793	-0.355793	0.893316	-0.355793	-0.355793	-0.355793	-0.355793	-0.355793	-0.355793	-0.355793	-0.355793	-0.355793	-0.355793	-0.355793	-0.355793	-0.355793	-0.355793
FCGRT--NM-004107--chr19--+	1.0146	0.250488	-0.687861	0.785878	0.00691458	-0.687861	0.191734	0.242682	-0.687861	-0.687861	-0.687861	0.726974	-0.687861	-0.687861	-0.687861	-0.687861	2	-0.687861	-0.687861	-0.687861	-0.259012	0.570889	0.187615	-0.687861	0.0482304	0.813333	-0.0827357	-0.687861	0.277057	1.60024	2	0.966372	2	-0.687861	-0.687861	0.242779	0.255281	1.09633	-0.687861	1.25828	0.941122	-0.687861	0.94549	0.835771	0.271292	1.94861	0.997426	-0.687861	-0.687861
FGA--NM-000508--chr4---	0.911488	0.514102	2	1.1491	-0.598831	2	1.17577	1.26514	0.940151	1.77041	1.36536	1.07924	-0.598831	-0.598831	0.714286	-0.598831	-0.598831	-0.598831	-0.598831	-0.598831	1.00574	0.894114	1.73072	-0.598831	0.91809	-0.598831	1.8421	-0.598831	0.545614	-0.598831	2	2	1.58891	-0.598831	0.766628	0.504958	1.28708	0.768197	-0.598831	1.15066	0.840341	0.842706	1.33841	-0.598831	1.6273	-0.598831	0.894821	-0.598831	-0.598831
FGA--NM-021871--chr4---	1.66849	0.815055	1.31869	1.22216	0.76875	0.561232	0.965763	0.966206	0.860404	0.987344	0.883074	1.07656	0.636892	0.949594	0.0343554	-0.491636	-0.128588	0.747423	0.875137	1.38193	1.39412	1.19194	1.13823	1.05706	1.84283	0.779208	1.59352	0.412622	0.144973	1.10598	1.24261	1.06909	1.77517	0.0195494	0.896356	1.00344	1.39099	0.717677	1.53523	1.46888	0.559319	1.3489	1.2726	0.842056	0.947844	1.47789	1.55799	-0.970106	1.47483
FGB--NM-001184741--chr4--+	1.27805	1.29281	0.884028	1.24384	0.941939	1.10989	1.12776	0.649071	1.19662	1.22382	1.0917	0.425507	0.730789	0.294366	0.471008	-2	0.441144	1.3187	1.24862	1.42696	1.49922	1.17815	1.19346	1.30034	1.75206	1.13314	1.43653	0.808344	0.57518	0.953176	1.00229	1.33067	1.89534	-0.508306	0.527091	0.913652	1.40174	0.784823	1.71178	1.14143	0.686915	1.28277	1.44687	0.409502	1.00335	1.64917	1.4331	0.0135764	1.07919
FGB--NM-005141--chr4--+	1.38014	1.02742	0.231026	0.92483	0.769466	1.07153	1.24395	1.22537	1.20047	1.60992	1.20422	0.480428	1.14777	1.22777	-1.19167	0.671466	0.66405	-1.19167	0.681555	1.67951	1.61832	1.23034	0.822664	1.33567	2	1.15737	2	0.36596	0.942934	1.74491	1.16384	1.5108	1.74187	0.398896	0.238061	0.44858	2	0.935788	0.321241	1.59837	0.296805	1.37504	1.644	1.08001	0.482675	1.44881	2	0.149459	1.16627
FGG--NM-000509--chr4---	1.18201	0.515571	1.26554	0.609546	1.19996	0.948608	0.931423	0.696136	1.3658	1.4296	1.36948	0.264375	1.02188	-0.461917	0.601659	-1.50864	0.828588	-1.50864	1.25342	1.1104	1.70138	1.772	0.436179	1.2015	2	0.543909	1.88723	0.768323	1.04574	0.945818	1.3298	1.2595	1.6347	-1.50864	0.217794	0.780475	1.88524	1.03511	0.858264	1.58478	-0.0270121	1.20048	1.16232	0.35708	0.487722	1.41779	1.46268	-1.50864	1.14589
FGG--NM-021870--chr4---	1.78621	0.96897	-0.692333	0.854264	0.0367903	2	1.37657	0.956935	0.669381	-0.692333	2	0.792448	-0.692333	-0.692333	0.469532	-0.692333	-0.692333	-0.692333	2	0.271821	0.449378	1.76337	0.871421	1.49387	1.9386	-0.692333	1.46744	0.213562	0.320288	1.70889	2	0.602655	1.80653	-0.692333	-0.692333	0.957084	0.97635	0.517233	2	0.855639	-0.692333	0.0371069	0.584798	1.82039	0.684431	2	1.44723	-0.692333	2
FGL1--NM-004467--chr8---	1.83382	1.6296	0.687789	1.42932	0.572795	-1.63421	0.328077	0.568105	1.21726	1.13111	0.651455	0.553182	0.998526	0.754271	0.814677	0.462509	0.454164	-1.63421	2	0.699057	0.943001	0.923222	1.44828	1.48214	1.61183	-0.326045	1.18691	0.118703	-0.231231	1.39389	1.86761	0.701788	1.66711	0.454941	-0.0252307	0.211681	1.63751	1.12544	0.0683779	0.616914	0.0408786	0.777593	0.87134	1.13719	-0.23781	0.109984	1.37734	-1.63421	1.01935
FIS1--NM-016068--chr7---	0.356173	-0.809819	-0.809819	2	-0.173646	-0.809819	-0.00441509	0.0422358	0.776023	-0.809819	0.706569	0.485679	-0.809819	-0.809819	-0.809819	-0.809819	-0.809819	-0.809819	2	1.05855	1.17385	-0.147803	-0.367215	1.09768	0.568416	1.00078	0.523099	-0.809819	-0.809819	-0.809819	1.79683	1.29899	2	-0.809819	2	0.629328	0.646137	1.2671	-0.809819	-0.0174228	-0.174541	-0.17337	-0.809819	1.38258	0.391433	-0.809819	0.73332	-0.809819	-0.809819
FKBP2--NM-004470--chr11--+	0.658493	-0.719369	-0.719369	0.216063	0.0324024	-0.719369	0.899593	1.51083	-0.719369	-0.719369	0.350092	-0.719369	2	-0.719369	2	-0.719369	2	-0.719369	-0.719369	0.962314	1.22729	1.10338	0.58487	2	0.0771076	0.236003	1.77409	0.214665	0.324706	-0.719369	-0.719369	0.615844	2	-0.719369	2	0.287616	0.301144	0.682028	2	0.217012	1.04325	-0.719369	1.04797	1.8714	1.31153	-0.719369	-0.719369	-0.719369	-0.719369
FN1--NM-212474--chr2---	0.744467	-0.222034	-1.03197	2	0.931253	1.30754	0.669682	1.37622	1.26793	0.692247	0.833262	0.909984	2	-1.03197	-1.03197	1.70365	1.69276	-1.03197	-1.03197	0.72927	0.977721	0.0545202	1.14245	0.766158	1.01372	0.674809	1.14725	0.644493	-1.03197	-1.03197	-1.03197	0.0331427	-0.0652287	-1.03197	0.598141	-0.228688	0.493795	0.599744	-1.03197	0.647839	1.15354	0.0171079	1.35802	1.5632	1.1362	-1.03197	0.422686	-1.03197	0.914573
FOS--NM-005252--chr14--+	-0.819424	-0.819424	-0.819424	-0.819424	-0.819424	2	-0.819424	-0.819424	-0.819424	-0.819424	-0.819424	-0.819424	-0.819424	0.286653	1.41054	-0.819424	-0.819424	-0.819424	-0.819424	-0.819424	-0.374985	-0.819424	-0.819424	-0.819424	-0.819424	-0.819424	-0.819424	-0.819424	-0.819424	-0.819424	-0.819424	-0.418795	-0.819424	-0.819424	-0.819424	-0.819424	-0.819424	1.0063	0.638885	-0.819424	-0.819424	-0.819424	-0.424994	1.15209	-0.819424	-0.819424	-0.819424	-0.819424	-0.819424
FTH1--NM-002032--chr11---	0.577069	-1.37371	1.31594	1.73903	0.213622	-0.334357	0.0913227	2	0.11879	-0.752455	0.660019	2	-0.268381	-1.92407	-0.0841805	-1.92407	0.632298	-1.92407	1.42252	0.263219	0.52197	0.343246	1.43545	0.597475	1.02535	-0.0342992	0.773262	0.39082	0.434821	1.53784	0.426046	0.716573	1.2849	-1.92407	1.38699	0.160434	-0.272603	1.03078	0.664757	-0.78263	0.509164	0.443624	0.29725	0.842938	0.619731	0.710353	-0.396352	0.0374207	0.979349
FTL--NM-000146--chr19--+	0.131428	-0.691944	0.791497	2	-0.478951	-0.921316	-0.0774533	2	-0.0591075	-0.694651	0.19193	2	0.238239	-1.99303	-0.507395	-1.05828	1.04675	-1.19062	1.24842	-1.14504	-0.0580457	-0.464063	1.04009	0.724494	0.355704	0.0893668	-0.40936	0.263893	-0.446364	-0.229277	1.50473	0.585062	1.29274	-1.22468	2	-0.123261	0.194633	0.210231	0.727372	-1.23164	0.0488034	-0.820161	-0.203141	-0.32888	0.143326	0.252472	-0.81946	-1.2725	0.636965
FUOM--NM-001098483--chr10---	1.55705	0.607079	2	0.51528	0.950943	-0.559516	0.534033	0.597374	1.05367	-0.559516	-0.559516	1.19947	-0.559516	1.86726	-0.559516	-0.559516	2	-0.559516	-0.559516	-0.559516	0.793039	0.339346	0.939034	2	-0.559516	-0.559516	2	0.513674	1.45693	-0.559516	2	1.4971	2	1.08663	0.871782	-0.559516	1.17595	0.683163	2	0.516371	0.949049	-0.559516	-0.559516	-0.559516	1.0715	2	-0.559516	-0.559516	-0.559516
FXYD1--NM-005031--chr19--+	2	0.782761	2	2	-0.444984	-0.444984	-0.444984	0.772547	0.533939	1.1637	-0.444984	2	-0.444984	-0.444984	-0.444984	-0.444984	-0.444984	-0.444984	-0.444984	-0.444984	1.32512	-0.444984	1.50466	2	0.0788723	-0.444984	2	0.68446	-0.444984	-0.444984	2	2	2	-0.444984	1.06134	1.61146	0.0311217	0.862833	-0.444984	-0.444984	-0.444984	-0.444984	1.14731	-0.444984	2	2	-0.444984	-0.444984	-0.444984
FXYD2--NM-001680--chr11---	-0.445793	-0.445793	-0.445793	0.298154	-0.445793	2	0.311134	-0.445793	0.198045	-0.445793	-0.445793	2	-0.445793	-0.445793	0.506938	-0.445793	-0.445793	-0.445793	-0.445793	-0.445793	-0.445793	0.637413	-0.0298289	-0.445793	-0.101253	-0.445793	-0.445793	0.297042	0.94994	-0.445793	2	1.53608	-0.445793	-0.445793	2	-0.445793	-0.132658	2	1.76888	-0.445793	-0.445793	-0.445793	-0.445793	-0.445793	0.0139726	-0.445793	0.637926	-0.445793	-0.445793
G0S2--NM-015714--chr1--+	1.61791	0.44311	-0.541384	2	-0.541384	-0.541384	1.93275	0.43492	-0.541384	1.55444	0.4956	1.8191	-0.541384	1.50658	1.37476	-0.541384	-0.541384	-0.541384	-0.541384	-0.541384	1.54733	-0.541384	-0.541384	1.64428	0.230906	-0.541384	1.32463	-0.541384	0.470985	2	-0.541384	1.1942	1.95686	-0.541384	2	0.435022	-0.159608	0.334023	-0.541384	0.366562	1.53106	0.187875	1.17229	-0.541384	0.0191651	2	1.22678	-0.541384	-0.541384
GABARAP--NM-007278--chr17---	0.988059	-0.810716	-0.810716	1.2243	-0.810716	1.55822	-0.810716	1.33694	-0.810716	-0.810716	0.636697	-0.810716	-0.810716	-0.810716	-0.810716	-0.810716	1.04774	-0.810716	-0.810716	1.60654	0.140136	-0.810716	0.491627	-0.810716	0.683176	-0.810716	-0.281834	-0.0562588	-0.810716	1.1891	1.67737	-0.192779	1.64303	0.346533	0.195492	0.00266714	-0.492682	1.24572	1.4386	-0.810716	-0.204334	0.251554	-0.810716	0.520945	0.0275872	2	-0.810716	-0.810716	-0.810716
GADD45B--NM-015675--chr19--+	-0.711209	-0.0342459	-0.711209	-0.711209	-0.711209	2	-0.711209	-0.711209	-0.171443	-0.711209	0.847794	-0.711209	-0.711209	-0.711209	-0.711209	-0.711209	-0.711209	-0.711209	-0.711209	-0.711209	-0.40182	-0.711209	-0.711209	-0.711209	0.028379	0.371813	-0.274647	-0.0884477	-0.711209	-0.711209	-0.711209	0.179036	-0.711209	-0.711209	0.119358	-0.711209	-0.711209	1.61326	-0.711209	-0.711209	-0.210675	-0.711209	-0.711209	-0.711209	-0.0192376	-0.711209	-0.18933	-0.711209	-0.711209
GAMT--NM-000156--chr19---	1.82405	1.66053	2	1.51085	0.444154	2	2	2	2	1.17638	-0.507255	1.43019	-0.507255	-0.507255	-0.507255	-0.507255	2	-0.507255	-0.507255	0.750838	-0.507255	2	1.87622	-0.507255	0.500731	-0.507255	0.962784	0.674818	0.814082	-0.507255	-0.507255	-0.507255	2	1.30591	1.06926	0.767142	0.784262	1.26629	2	-0.507255	-0.507255	-0.507255	0.44594	-0.507255	0.224369	2	0.483331	-0.507255	-0.507255
GAPDH--NM-001289746--chr12--+	0.461493	1.12187	1.07716	0.669196	0.697376	-0.999003	-0.24442	1.85683	0.114146	0.0557491	0.854831	2	2	-0.999003	-0.0492226	-0.999003	2	-0.999003	-0.999003	0.751474	0.363208	0.0808477	0.494174	1.66381	0.908419	0.288835	0.977898	-0.999003	1.45437	-0.999003	-0.999003	0.420123	1.71295	-0.999003	0.621146	-0.20063	0.198522	0.622739	-0.999003	-0.999003	1.17315	0.952828	-0.401854	0.308083	1.91073	1.26276	0.446764	0.958126	-0.999003
GAPDH--NM-002046--chr12--+	0.162949	-0.402475	0.694005	-0.457113	-1.09683	1.752	-0.445952	0.42835	-0.543198	-1.09683	-1.09683	0.568005	-1.09683	0.347585	0.649516	1.24841	-1.09683	1.98901	1.26111	0.413079	0.0781715	-0.165385	0.00580051	1.20004	0.0169776	-0.443477	-1.09683	0.62423	0.103357	1.38387	1.00971	-1.09683	0.665164	-1.09683	-0.244923	0.0662032	-0.0638821	0.762378	0.807564	-0.456464	0.584543	0.110393	-1.09683	0.674935	0.0971278	-1.09683	-0.561545	0.591331	2
GATM--NM-001482--chr15---	1.01929	-0.596492	2	1.2735	0.945113	2	1.30203	-0.596492	1.04996	0.963584	0.65764	2	-0.596492	-0.596492	-0.596492	-0.596492	2	-0.596492	2	-0.596492	0.783953	2	0.0168521	-0.596492	2	0.523851	2	-0.596492	-0.596492	-0.596492	-0.596492	0.300628	-0.596492	1.0836	0.864319	-0.596492	1.42112	1.04689	2	0.50158	0.94318	1.4736	0.94769	-0.596492	0.0814379	-0.596492	0.321394	-0.596492	2
GC--NM-001204307--chr4---	2	1.30064	2	1.04853	0.888182	0.583486	1.64634	0.412905	0.985128	1.23126	0.486893	0.273156	1.9368	0.739468	-0.0121931	-1.2427	-1.2427	-1.2427	-1.2427	1.26995	1.16868	1.36189	0.83565	0.84863	1.38712	-0.231256	0.827801	0.542531	0.186144	0.298934	2	0.641891	1.69735	-0.350591	0.0297366	1.00036	1.21816	1.7014	-1.2427	0.545631	1.21106	1.47719	0.890601	1.36092	-0.155584	1.29335	0.811845	-1.2427	0.989335
GCHFR--NM-005258--chr15--+	-0.532148	-0.532148	-0.532148	0.606482	-0.532148	-0.532148	-0.532148	2	1.17685	1.08719	1.64903	1.3313	-0.532148	-0.532148	-0.532148	-0.532148	-0.532148	-0.532148	-0.532148	2	1.24968	2	1.7603	2	1.15235	2	2	-0.532148	1.60406	-0.532148	-0.532148	0.399051	1.89727	-0.532148	-0.532148	-0.532148	1.5621	0.330508	-0.532148	0.607637	1.06601	1.61658	1.07069	-0.532148	2	-0.532148	2	-0.532148	-0.532148
GIMAP7--NM-153236--chr7--+	-0.395642	-0.395642	-0.395642	-0.395642	-0.395642	-0.395642	-0.395642	-0.395642	-0.395642	-0.395642	-0.395642	-0.395642	-0.395642	-0.395642	-0.395642	-0.395642	-0.395642	-0.395642	-0.395642	-0.395642	-0.395642	-0.395642	-0.395642	-0.395642	-0.395642	-0.395642	-0.395642	-0.395642	-0.395642	-0.395642	-0.395642	-0.395642	-0.395642	-0.395642	-0.395642	-0.395642	-0.395642	-0.125994	-0.395642	-0.395642	-0.395642	-0.395642	-0.395642	-0.395642	0.199853	-0.395642	-0.395642	-0.395642	-0.395642
GMFG--NM-004877--chr19---	-0.581552	-0.581552	-0.581552	-0.581552	-0.581552	-0.581552	-0.581552	-0.581552	-0.581552	-0.581552	-0.581552	-0.581552	-0.581552	-0.581552	-0.581552	-0.581552	-0.581552	-0.581552	-0.581552	-0.581552	-0.581552	-0.581552	-0.581552	-0.581552	-0.581552	-0.581552	-0.581552	-0.581552	-0.581552	-0.581552	-0.581552	-0.581552	-0.581552	-0.581552	-0.581552	-0.581552	-0.581552	-0.581552	-0.581552	-0.581552	-0.581552	-0.581552	-0.581552	-0.581552	-0.581552	-0.581552	-0.581552	-0.581552	-0.581552
GNAS--NM-001309840--chr20--+	1.93938	-0.606062	-0.606062	-0.606062	0.142743	-0.606062	-0.606062	-0.606062	-0.606062	-0.606062	0.459178	-0.606062	-0.606062	1.49771	1.36229	-0.606062	-0.606062	-0.606062	-0.606062	0.384117	-0.606062	0.173161	-0.606062	-0.606062	0.187271	-0.606062	0.0461207	-0.606062	0.433893	-0.606062	-0.606062	0.155938	0.601051	-0.606062	0.634728	-0.606062	-0.606062	0.293199	-0.606062	-0.606062	-0.606062	0.70386	0.144148	-0.606062	-0.0302387	-0.606062	-0.606062	-0.606062	-0.606062
GNB2L1--NM-006098--chr5---	-0.061996	-0.24971	1.15425	-0.0838321	-0.539945	-1.60635	-0.317236	0.850188	-0.0386266	-1.60635	-0.960057	-0.6812	1.4794	-1.60635	0.214413	-1.60635	-1.60635	1.1205	-1.60635	-1.60635	-0.304568	-0.273746	0.0409154	0.423313	-0.488683	-0.313353	-0.260622	-0.643945	-0.219638	-0.110174	-1.60635	0.222671	0.831077	-1.60635	0.498882	0.000558459	0.0162329	0.926728	0.0764989	-0.641826	-0.314711	-0.539568	0.0530203	0.668729	0.256065	-1.60635	-1.13334	0.580476	-1.60635
GNG11--NM-004126--chr7--+	-0.40687	-0.40687	-0.40687	-0.40687	-0.40687	-0.40687	-0.40687	-0.40687	-0.40687	-0.40687	-0.40687	-0.40687	-0.40687	-0.40687	-0.40687	-0.40687	-0.40687	-0.40687	-0.40687	-0.40687	-0.40687	-0.40687	-0.40687	-0.40687	-0.40687	-0.40687	-0.40687	-0.40687	-0.40687	-0.40687	-0.40687	-0.40687	-0.40687	-0.40687	-0.40687	-0.40687	0.0469722	-0.40687	-0.40687	-0.40687	0.458452	-0.40687	-0.40687	-0.40687	-0.40687	-0.40687	-0.40687	-0.40687	-0.40687
GNG5--NM-005274--chr1---	0.745326	-0.700046	-0.700046	1.94279	0.0885595	-0.700046	0.298339	1.08377	0.772757	-0.700046	-0.700046	-0.700046	-0.700046	-0.700046	0.556604	-0.700046	-0.700046	-0.700046	-0.700046	-0.700046	0.190213	-0.700046	1.27557	1.66451	-0.245598	0.302136	0.518442	0.279752	-0.700046	-0.700046	2	0.700588	1.39362	-0.700046	0.606696	-0.700046	-0.287022	1.06381	-0.700046	-0.700046	-0.700046	0.0889018	0.681274	1.02935	0.388641	-0.700046	0.121032	-0.700046	1.85968
GNLY--NM-006433--chr2--+	-0.185882	-0.185882	-0.185882	-0.185882	-0.185882	-0.185882	-0.185882	-0.185882	-0.185882	-0.185882	-0.185882	-0.185882	-0.185882	-0.185882	-0.185882	-0.185882	-0.185882	-0.185882	-0.185882	-0.185882	-0.185882	-0.185882	-0.185882	-0.185882	-0.185882	-0.185882	-0.185882	-0.185882	-0.185882	-0.185882	-0.185882	-0.185882	-0.185882	-0.185882	-0.185882	-0.185882	-0.185882	-0.185882	-0.185882	-0.185882	-0.185882	-0.185882	-0.185882	-0.185882	-0.185882	-0.185882	-0.185882	-0.185882	-0.185882
GPX1--NM-000581--chr3---	1.34199	-0.612543	-0.612543	1.9064	0.0472759	-0.612543	-0.612543	0.271181	-0.612543	-0.612543	-0.612543	0.731107	-0.612543	-0.612543	-0.612543	-0.612543	-0.612543	-0.612543	-0.612543	-0.612543	-0.205271	0.0740792	1.04044	-0.612543	0.086513	0.225974	0.406955	-0.612543	-0.612543	1.56044	-0.612543	-0.612543	-0.612543	-0.612543	1.181	-0.612543	0.283147	0.482052	-0.612543	-0.612543	0.539819	-0.612543	-0.612543	-0.612543	-0.105149	-0.612543	-0.612543	-0.612543	-0.612543
GPX4--NM-002085--chr19--+	1.1565	-0.452061	0.664459	0.595339	0.330882	-1.15911	-0.496333	1.15931	-0.18139	-1.15911	-1.15911	0.536156	2	0.311708	-0.324883	-1.15911	1.73669	-1.15911	2	0.011974	0.595288	0.376495	0.856943	1.69374	-0.0249421	-0.027955	0.743285	-0.0500966	-0.432041	1.36694	2	0.350756	0.956338	-1.15911	1.49627	0.394076	0.172836	0.613801	0.780093	-0.507037	-0.636331	-0.243298	0.0716257	-0.0110481	1.48426	-1.15911	0.11076	0.559908	0.540162
GRHPR--NM-012203--chr9--+	1.83102	-0.611056	2	-0.611056	1.7353	-0.611056	1.16432	0.493103	1.87029	-0.611056	-0.611056	-0.611056	-0.611056	-0.611056	-0.611056	-0.611056	-0.611056	2	2	0.47909	0.319614	1.80713	-0.0374955	2	-0.13598	0.436618	2	1.69358	0.533891	-0.611056	2	0.227874	1.57764	0.96006	-0.611056	0.493218	0.508052	1.23286	2	-0.611056	1.32185	0.213704	-0.611056	1.19685	0.0229011	-0.611056	-0.611056	-0.611056	-0.611056
GSN--NM-001258029--chr9--+	-0.50938	0.667256	2	0.574667	-0.50938	2	0.593581	-0.50938	1.66235	-0.50938	-0.50938	-0.50938	-0.50938	-0.50938	-0.50938	-0.50938	-0.50938	-0.50938	-0.50938	-0.50938	0.0283717	1.06902	0.0967445	-0.50938	0.413636	1.97014	-0.50938	0.573047	-0.50938	-0.50938	-0.50938	-0.50938	0.895054	-0.50938	-0.50938	-0.50938	-0.50938	0.311923	2	0.575768	-0.50938	-0.50938	0.363463	-0.50938	-0.50938	-0.50938	1.06977	-0.50938	-0.50938
GSTA1--NM-145740--chr6---	0.94815	0.449883	1.93086	1.3529	0.781482	1.10292	0.705387	1.16036	1.15766	-0.0557995	-0.269436	0.999368	0.460497	1.26917	0.845506	-1.3054	1.67943	1.30328	0.687936	1.5233	1.26256	2	1.41338	2	1.43799	0.71016	1.2434	0.944851	-0.290796	0.791714	1.66461	-0.0519155	1.89823	-1.3054	2	0.777181	1.47538	1.28218	2	-0.382676	0.553081	0.280502	0.783778	-0.352284	0.375363	0.343861	0.470482	-1.3054	2
GSTA2--NM-000846--chr6---	0.128583	-0.626431	1.86813	1.37796	2	-0.626431	0.280221	-0.626431	0.144762	-0.626431	-0.626431	-0.626431	-0.626431	2	0.514756	2	-0.626431	-0.626431	2	2	1.0103	2	1.16766	1.52087	1.1354	2	-0.626431	2	-0.626431	-0.626431	-0.626431	-0.626431	1.27486	0.738376	2	0.332837	0.591726	1.52567	2	0.265578	0.624308	0.626362	-0.626431	-0.626431	0.725831	-0.626431	0.671654	-0.626431	1.6981
GSTO1--NM-004832--chr10--+	0.520448	-0.921196	1.12817	0.32677	0.459816	-0.921196	0.345806	0.409616	1.10903	0.770364	-0.921196	0.276889	-0.921196	-0.921196	1.43672	-0.921196	0.879417	-0.921196	-0.921196	-0.921196	1.05043	-0.308959	-0.511873	2	0.353405	-0.921196	0.584883	0.723515	-0.921196	-0.921196	2	0.123744	2	-0.921196	-0.921196	-0.133128	0.575672	0.999557	2	-0.188383	-0.333686	0.108013	-0.331754	0.369019	-0.46877	1.31138	1.66102	-0.921196	0.988479
GSTP1--NM-000852--chr11--+	-0.60327	-0.60327	-0.60327	-0.60327	-0.60327	-0.60327	0.112656	-0.60327	-0.60327	-0.60327	-0.60327	-0.60327	-0.60327	-0.60327	0.297853	-0.60327	-0.60327	-0.60327	-0.60327	-0.60327	-0.60327	-0.60327	-0.209838	-0.60327	-0.60327	-0.60327	-0.110743	-0.60327	-0.60327	-0.60327	-0.60327	-0.60327	-0.60327	-0.60327	-0.60327	-0.60327	-0.307097	1.44174	-0.60327	-0.60327	-0.60327	-0.60327	-0.60327	1.84391	-0.60327	-0.60327	-0.0144883	-0.60327	-0.60327
GUK1--NM-001159390--chr1--+	1.27036	0.42151	-0.620904	0.339483	-0.620904	-0.620904	-0.620904	1.12496	0.210248	-0.620904	-0.620904	-0.620904	-0.620904	-0.620904	-0.620904	2	1.74128	-0.620904	-0.620904	-0.620904	0.250414	0.182277	1.03444	1.69334	-0.620904	0.359956	0.0513306	-0.620904	-0.620904	-0.620904	2	-0.620904	1.42821	-0.620904	0.658036	-0.620904	0.691964	0.306005	-0.620904	-0.620904	0.149837	0.729293	-0.620904	-0.620904	-0.620904	2	-0.620904	-0.620904	-0.620904
H2AFJ--NM-177925--chr12--+	-0.624561	-0.624561	-0.624561	1.7386	0.0805903	-0.624561	-0.624561	0.319879	-0.624561	1.40286	-0.624561	-0.624561	-0.624561	-0.624561	-0.624561	-0.624561	-0.624561	-0.624561	2	-0.624561	-0.189308	-0.624561	-0.133967	-0.624561	-0.624561	-0.624561	-0.624561	-0.624561	0.354767	1.69771	-0.624561	0.0930166	1.24754	-0.624561	-0.624561	0.319977	0.332666	1.39667	-0.624561	-0.624561	0.0795982	-0.624561	-0.624561	-0.624561	-0.624561	-0.624561	-0.624561	-0.624561	2
H2AFZ--NM-002106--chr4---	-0.550133	-0.550133	-0.550133	-0.550133	-0.550133	-0.550133	-0.550133	-0.550133	-0.550133	-0.550133	0.578642	-0.550133	-0.550133	-0.550133	-0.550133	-0.550133	-0.550133	-0.550133	-0.550133	-0.550133	-0.0603671	-0.550133	-0.550133	-0.550133	-0.092884	-0.550133	-0.550133	-0.550133	-0.550133	-0.550133	-0.550133	0.257316	-0.550133	-0.550133	-0.550133	-0.550133	-0.550133	0.591398	-0.550133	-0.550133	-0.550133	-0.550133	-0.550133	-0.550133	-0.550133	-0.550133	-0.550133	-0.550133	-0.550133
H3F3AP4--NR-002315--chr1--+	0.123092	-0.190538	-1.23568	0.0481478	0.0698351	1.30606	-1.23568	-0.198109	-0.0922437	-0.423955	-0.142322	0.249694	-1.23568	-1.23568	-0.50474	-1.23568	-1.23568	-1.23568	-1.23568	0.371602	0.301505	-0.123515	-0.916551	-1.23568	0.0154855	-0.652754	0.123052	0.299858	-1.23568	-1.23568	0.643786	-0.420991	0.85141	-1.23568	0.0111691	0.125205	-0.455441	1.34802	-1.23568	-0.664341	-0.160206	-0.433256	-0.157323	-0.229761	0.00348905	-1.23568	-0.404246	-1.23568	-1.23568
H3F3B--NM-005324--chr17---	-1.20468	-0.629859	0.277851	-0.301888	-1.20468	-1.20468	-0.665851	-0.241956	-0.746355	-1.20468	-0.190193	-1.20468	-1.20468	-1.20468	1.06291	-1.20468	-1.20468	-1.20468	0.747327	-0.641875	0.0148666	-0.76178	0.338524	0.696764	0.157359	0.00663733	-0.833987	-0.675883	-0.211111	-1.20468	-1.20468	-0.448758	-0.0747326	-1.20468	0.285182	-1.20468	-0.626923	0.550444	0.37186	-0.674554	-0.46136	-1.20468	-0.459182	-0.271324	-0.401024	-1.20468	-0.761544	-1.20468	-1.20468
HBA1--NM-000558--chr16--+	-0.372992	-0.372992	-0.372992	-0.372992	-0.372992	-0.372992	-0.372992	-0.372992	-0.372992	-0.372992	-0.372992	-0.372992	-0.372992	-0.372992	-0.372992	-0.372992	-0.372992	1.86416	-0.372992	-0.372992	-0.372992	-0.372992	-0.372992	-0.372992	-0.372992	0.100674	-0.372992	-0.372992	-0.372992	-0.372992	-0.372992	-0.372992	-0.372992	-0.372992	-0.372992	-0.372992	-0.372992	-0.372992	-0.372992	-0.372992	-0.372992	-0.372992	-0.372992	-0.372992	-0.372992	-0.372992	-0.372992	-0.372992	-0.372992
HBA2--NM-000517--chr16--+	-0.0945065	-0.452842	-0.452842	-0.452842	-0.452842	-0.452842	-0.452842	-0.452842	-0.452842	-0.452842	-0.452842	-0.452842	-0.452842	-0.452842	-0.452842	-0.452842	-0.452842	-0.452842	-0.452842	-0.452842	-0.452842	-0.452842	-0.452842	-0.452842	-0.452842	-0.452842	-0.452842	-0.452842	-0.452842	-0.452842	-0.452842	-0.452842	-0.452842	-0.452842	-0.452842	-0.452842	-0.452842	-0.334489	-0.452842	-0.452842	-0.452842	-0.452842	-0.452842	-0.452842	-0.452842	-0.452842	-0.452842	-0.452842	-0.452842
HBB--NM-000518--chr11---	-0.785999	-0.785999	-0.785999	-0.785999	-0.785999	-0.785999	-0.785999	-0.785999	-0.785999	-0.785999	-0.785999	-0.785999	0.394568	-0.785999	-0.322989	-0.785999	-0.785999	-0.785999	-0.785999	-0.785999	-0.606651	-0.785999	-0.785999	-0.785999	-0.785999	-0.785999	-0.785999	-0.785999	-0.785999	-0.785999	-0.785999	-0.490319	-0.785999	-0.785999	-0.785999	-0.785999	-0.785999	-0.684823	-0.785999	-0.785999	-0.495848	-0.785999	-0.785999	-0.785999	-0.384875	-0.785999	-0.483475	-0.785999	-0.785999
HCST--NM-014266--chr19--+	-0.387876	-0.387876	-0.387876	-0.387876	-0.387876	-0.387876	-0.387876	-0.387876	-0.387876	-0.387876	-0.387876	-0.387876	-0.387876	-0.387876	-0.387876	-0.387876	-0.387876	-0.387876	-0.387876	-0.387876	-0.387876	-0.387876	-0.387876	-0.387876	-0.387876	-0.387876	-0.387876	-0.387876	-0.387876	-0.387876	-0.387876	-0.387876	-0.387876	-0.387876	-0.387876	-0.387876	-0.387876	-0.387876	-0.387876	-0.387876	-0.387876	-0.387876	-0.387876	-0.387876	-0.387876	-0.387876	-0.387876	-0.387876	-0.387876
HIGD2A--NM-138820--chr5--+	-0.57088	-0.57088	-0.57088	1.1979	-0.57088	-0.57088	-0.57088	1.31532	0.98646	-0.57088	0.615374	2	2	-0.57088	0.7579	-0.57088	-0.57088	-0.57088	-0.57088	1.29446	-0.57088	0.296864	0.479867	1.9294	0.312578	0.488826	-0.57088	-0.57088	-0.57088	-0.57088	2	1.41453	1.64295	-0.57088	-0.57088	-0.57088	0.237544	1.14371	-0.57088	-0.57088	0.261817	-0.57088	-0.57088	-0.57088	0.0703582	-0.57088	-0.57088	-0.57088	-0.57088
HINT1--NM-005340--chr5---	0.989242	-1.48917	2	0.987767	-0.128757	1.15945	0.722256	1.33948	-0.0504912	1.22239	0.887744	1.04557	0.45293	-1.48917	-0.232705	-1.48917	-0.0262843	-1.48917	-1.48917	0.413581	1.03072	0.120704	1.00597	1.75159	0.485984	0.362358	1.31395	0.696402	-0.825333	1.29954	0.469329	0.709744	1.74456	-0.578241	1.11804	-0.407871	-0.160476	1.64157	1.54749	0.113897	1.11177	0.076103	0.689134	0.904484	0.759544	1.10038	0.302822	-1.48917	1.9165
HINT2--NM-032593--chr9---	2	-0.498446	2	0.654287	-0.498446	-0.498446	-0.498446	0.742333	-0.498446	-0.498446	1.70975	1.38808	2	-0.498446	-0.498446	-0.498446	-0.498446	-0.498446	-0.498446	0.726587	0.547379	-0.498446	0.668907	2	0.483053	-0.498446	1.44258	0.652564	-0.498446	-0.498446	2	-0.498446	1.96107	-0.498446	1.03664	-0.498446	0.399691	1.40642	2	-0.498446	-0.498446	-0.498446	0.429701	1.53315	-0.498446	2	-0.498446	-0.498446	-0.498446
HIST1H1C--NM-005319--chr6---	-0.589371	-0.589371	1.83112	1.73938	1.04174	-0.589371	-0.589371	1.86827	0.158922	0.640312	-0.589371	1.66082	2	-0.589371	2	-0.589371	-0.589371	-0.589371	-0.589371	-0.589371	-0.160456	-0.589371	-0.105921	-0.589371	0.146834	0.293705	1.18945	0.273982	-0.589371	-0.589371	2	0.644803	2	-0.589371	-0.589371	0.341413	0.0843059	0.563392	1.98461	-0.589371	0.624229	0.626223	0.106816	0.934496	-0.0550134	-0.589371	0.67017	-0.589371	-0.589371
HIST1H4C--NM-003542--chr6--+	1.78328	-0.486554	-0.486554	1.13881	-0.486554	-0.486554	-0.486554	0.53973	0.338601	-0.486554	-0.486554	1.07385	-0.486554	-0.486554	-0.486554	-0.486554	1.85859	-0.486554	-0.486554	-0.486554	0.378477	-0.486554	-0.486554	-0.486554	-0.0449842	-0.486554	-0.486554	-0.486554	1.30225	-0.486554	-0.486554	0.293208	0.748696	-0.486554	-0.486554	-0.486554	-0.486554	1.48121	-0.486554	-0.486554	-0.486554	-0.486554	-0.486554	-0.486554	0.102691	-0.486554	-0.486554	-0.486554	-0.486554
HIST2H2AA3--NM-003516--chr1---	-0.1384	-0.631281	1.73048	0.360385	-0.631281	-0.631281	-0.631281	-0.631281	0.241839	-0.631281	-0.631281	-0.631281	2	-0.631281	1.85954	-0.631281	-0.631281	-0.631281	-0.631281	-0.0130731	0.100775	-0.631281	0.179793	1.45735	-0.135972	0.378859	-0.631281	-0.631281	0.0180039	0.908363	1.28428	-0.631281	2	-0.631281	-0.631281	-0.631281	0.308021	0.493972	-0.631281	-0.631281	-0.631281	-0.631281	-0.162895	-0.631281	-0.631281	-0.631281	0.216122	-0.631281	0.886196
HLA-A--NM-002116-3--chr6--+	-0.199861	-1.03127	-1.03127	-0.0690574	-1.03127	-1.03127	-1.03127	-0.423713	-0.54278	-0.228527	-1.03127	-1.03127	-1.03127	-1.03127	0.16115	-1.03127	-1.03127	-1.03127	-1.03127	-0.431423	-1.03127	-1.03127	-1.03127	-1.03127	-0.769862	-0.454793	-1.03127	-1.03127	-0.401269	-1.03127	-1.03127	-0.569653	-1.03127	-1.03127	-1.03127	-1.03127	-1.03127	-0.185659	-1.03127	-1.03127	-0.578285	-1.03127	-1.03127	-0.0364819	-1.03127	-1.03127	-1.03127	-1.03127	-1.03127
HLA-B--NM-005514-2--chr6---	-1.12119	-1.12119	-1.12119	-0.605097	-1.12119	-1.12119	-1.12119	-0.565677	-0.346573	0.0713231	-1.12119	0.221916	-1.12119	-1.12119	-0.460258	-1.12119	-1.12119	-1.12119	-1.12119	-1.12119	-0.173256	-0.369745	-0.832626	0.122442	-0.509196	-0.594095	-1.12119	-1.12119	-1.12119	-1.12119	0.578262	-0.38453	-0.452567	-1.12119	-0.433913	-1.12119	-0.558156	-0.524483	-1.12119	-1.12119	-1.12119	-0.39562	-1.12119	-0.211617	-0.80224	-1.12119	-0.369389	-1.12119	-1.12119
HLA-C--NM-002117--chr6---	0.0438315	-0.666128	-1.26108	-0.712944	-0.49076	-1.26108	-0.703381	-1.26108	-0.786705	-1.26108	-1.26108	-1.26108	-1.26108	-1.26108	0.235257	-1.26108	-1.26108	-1.26108	-1.26108	-1.26108	-0.989173	-1.26108	-1.26108	1.13948	-0.306725	-0.70126	-0.338105	-1.26108	-1.26108	0.189673	0.543886	0.199156	-0.550944	-0.42156	-0.531132	-1.26108	-0.511768	-0.0624773	-1.26108	-1.26108	-0.491726	-0.490462	-0.819737	-1.26108	-1.26108	0.410554	-0.462602	-1.26108	0.839374
HLA-DMA--NM-006120--chr6---	-0.364395	-0.364395	-0.364395	-0.364395	-0.364395	-0.364395	-0.364395	-0.364395	-0.364395	-0.364395	-0.364395	-0.364395	-0.364395	-0.364395	-0.364395	-0.364395	-0.364395	-0.364395	-0.364395	-0.364395	0.228521	-0.364395	0.303908	-0.364395	0.189156	-0.364395	-0.364395	-0.364395	-0.364395	-0.364395	-0.364395	-0.364395	-0.364395	-0.364395	-0.364395	-0.364395	-0.364395	-0.0299128	-0.364395	-0.364395	-0.364395	-0.364395	-0.364395	-0.364395	-0.364395	-0.364395	-0.364395	-0.364395	-0.364395
HLA-DPA1--NM-033554--chr6---	-0.342093	-0.792224	0.695007	-0.792224	-0.792224	-0.792224	-0.792224	-0.792224	-0.792224	-0.792224	-0.184837	-0.792224	-0.792224	-0.792224	-0.111861	1.15542	-0.792224	-0.792224	-0.792224	-0.227636	-0.792224	-0.792224	-0.495176	-0.792224	-0.546181	-0.792224	-0.792224	-0.792224	-0.792224	-0.792224	-0.792224	-0.792224	-0.792224	-0.792224	-0.792224	-0.22032	-0.792224	-0.389722	0.789314	-0.792224	-0.792224	-0.36508	-0.792224	-0.792224	-0.792224	-0.792224	-0.792224	-0.792224	-0.792224
HLA-DPB1--NM-002121--chr6--+	-0.761605	-0.761605	-0.761605	-0.761605	-0.761605	-0.761605	-0.761605	0.167008	-0.761605	-0.761605	-0.761605	-0.761605	-0.761605	-0.761605	0.317538	-0.761605	-0.761605	-0.761605	-0.761605	-0.761605	-0.761605	-0.334398	-0.244303	-0.761605	-0.761605	-0.761605	-0.761605	-0.761605	-0.761605	-0.761605	-0.761605	-0.761605	-0.761605	-0.761605	-0.761605	-0.761605	-0.20432	-0.618655	-0.761605	-0.250263	-0.761605	-0.761605	-0.761605	-0.761605	-0.19486	-0.761605	-0.761605	-0.761605	-0.761605
HLA-DQA1--NM-002122--chr6--+	-0.509501	-0.509501	-0.509501	-0.509501	-0.509501	-0.509501	-0.509501	-0.509501	-0.509501	-0.509501	-0.509501	-0.509501	-0.509501	-0.509501	-0.509501	-0.509501	-0.509501	-0.509501	-0.509501	-0.509501	-0.509501	-0.509501	-0.509501	-0.509501	-0.509501	-0.509501	-0.509501	-0.509501	-0.509501	-0.509501	-0.509501	-0.509501	-0.509501	-0.509501	-0.509501	-0.509501	-0.131661	-0.258294	-0.509501	-0.509501	-0.509501	-0.509501	-0.509501	1.07257	-0.509501	-0.509501	-0.509501	-0.509501	-0.509501
HLA-DQB1--NM-002123--chr6---	-0.421544	-0.421544	-0.421544	-0.421544	-0.421544	-0.421544	-0.421544	-0.421544	-0.421544	-0.421544	-0.421544	-0.421544	-0.421544	-0.421544	-0.421544	-0.421544	-0.421544	-0.421544	-0.421544	-0.421544	-0.421544	-0.421544	-0.421544	-0.421544	-0.421544	-0.421544	-0.421544	-0.421544	-0.421544	-0.421544	-0.421544	-0.421544	-0.421544	-0.421544	-0.421544	-0.421544	-0.421544	-0.421544	-0.421544	-0.421544	-0.421544	-0.421544	-0.421544	-0.421544	-0.421544	-0.421544	-0.421544	-0.421544	-0.421544
HLA-DRA--NM-019111-5--chr6--+	-0.937908	-0.937908	-0.937908	-0.937908	-0.937908	-0.937908	-0.937908	-0.454616	-0.54933	-0.937908	-0.937908	-0.937908	-0.937908	-0.937908	-0.937908	-0.937908	-0.937908	-0.937908	-0.937908	-0.460749	-0.937908	-0.937908	-0.937908	0.144043	-0.937908	-0.937908	-0.937908	-0.489581	-0.937908	-0.937908	-0.937908	-0.937908	0.0200899	-0.937908	-0.339981	-0.454565	-0.748921	-0.699691	-0.937908	-0.488454	-0.577573	-0.576909	-0.937908	-0.937908	-0.660424	-0.937908	-0.937908	-0.937908	-0.937908
HLA-DRB1--NM-001243965-3--chr6---	-0.467257	-0.467257	-0.467257	-0.467257	-0.467257	-0.467257	-0.467257	-0.467257	-0.467257	-0.467257	-0.467257	-0.467257	-0.467257	-0.467257	-0.467257	-0.467257	-0.467257	-0.467257	-0.467257	-0.467257	-0.467257	-0.467257	-0.467257	-0.467257	-0.467257	-0.467257	-0.467257	-0.467257	-0.467257	-0.467257	-0.467257	-0.467257	-0.467257	-0.467257	-0.467257	-0.467257	-0.467257	-0.467257	-0.467257	-0.467257	-0.467257	-0.467257	-0.467257	-0.467257	-0.467257	-0.467257	-0.467257	-0.467257	-0.467257
HLA-DRB1--NM-002124--chr6---	-0.679206	-0.101787	-0.679206	-0.679206	-0.679206	-0.679206	-0.679206	0.287871	-0.679206	-0.679206	-0.679206	-0.679206	-0.679206	-0.679206	-0.679206	-0.679206	-0.679206	-0.679206	-0.679206	-0.679206	-0.679206	-0.679206	-0.679206	-0.679206	-0.226248	-0.679206	-0.679206	-0.679206	-0.679206	-0.679206	-0.679206	-0.679206	0.010002	-0.679206	-0.679206	-0.679206	-0.455289	-0.530335	-0.679206	-0.679206	-0.679206	-0.679206	-0.679206	0.25837	-0.0889859	-0.679206	-0.679206	-0.679206	-0.679206
HLA-DRB5--NM-002125--chr6---	-0.478543	-0.478543	-0.478543	-0.478543	-0.478543	-0.478543	0.379752	-0.478543	-0.478543	-0.478543	-0.478543	-0.478543	-0.478543	-0.478543	0.601778	-0.478543	-0.478543	-0.478543	-0.478543	-0.478543	-0.0600789	0.226948	-0.478543	-0.478543	-0.478543	-0.478543	-0.478543	-0.478543	-0.478543	-0.478543	-0.478543	-0.478543	0.61435	-0.478543	-0.478543	-0.478543	-0.478543	-0.478543	-0.478543	-0.478543	-0.478543	-0.478543	-0.478543	-0.478543	0.0427944	-0.478543	-0.478543	-0.478543	-0.478543
HLA-E--NM-005516-6--chr6--+	-0.833878	-0.833878	-0.833878	-0.833878	0.059613	-0.833878	-0.833878	-0.833878	-0.833878	-0.833878	-0.833878	-0.833878	-0.833878	-0.833878	0.509244	-0.833878	-0.833878	-0.833878	-0.833878	-0.158221	-0.833878	0.0918348	-0.833878	-0.833878	-0.833878	-0.833878	-0.833878	-0.833878	-0.124256	-0.833878	-0.833878	-0.833878	-0.833878	-0.833878	0.0127862	-0.833878	-0.14027	-0.0987883	-0.833878	-0.833878	-0.833878	-0.322703	-0.833878	0.286635	-0.833878	-0.833878	-0.301885	-0.833878	0.824618
HLA-F--NM-018950-6--chr6--+	0.340671	0.581418	-0.515915	-0.515915	-0.515915	-0.515915	-0.515915	-0.515915	-0.515915	-0.515915	-0.515915	-0.515915	-0.515915	-0.515915	-0.515915	-0.515915	-0.515915	-0.515915	-0.515915	-0.515915	-0.515915	-0.515915	-0.515915	-0.515915	-0.515915	-0.515915	-0.515915	-0.515915	-0.515915	-0.515915	-0.515915	-0.515915	0.793864	-0.515915	-0.515915	-0.515915	-0.515915	0.250034	2	-0.515915	-0.515915	-0.515915	-0.515915	-0.515915	-0.515915	-0.515915	-0.515915	-0.515915	-0.515915
HMGB1--NM-002128--chr13---	-0.491464	-0.335135	-1.04769	0.428954	-0.520097	-1.04769	-1.04769	-0.341063	-1.04769	-0.11405	-1.04769	0.0266915	-1.04769	-1.04769	-0.206968	-1.04769	-1.04769	-1.04769	-1.04769	-1.04769	-0.0203665	-0.498665	-0.680627	-1.04769	-0.0764835	-0.377211	0.515107	-1.04769	-0.31496	-1.04769	1.11405	-0.110641	0.760474	-1.04769	0.799157	-0.340989	-0.331495	1.02625	0.906604	-1.04769	0.189309	-0.519868	-0.123562	0.109308	-0.319338	-1.04769	-0.498372	-1.04769	-1.04769
HMGN2--NM-005517--chr1--+	-0.50846	-0.50846	-0.50846	-0.50846	-0.50846	-0.50846	-0.50846	0.721561	-0.50846	-0.50846	0.79801	-0.50846	-0.50846	-0.50846	0.95498	-0.50846	-0.50846	-0.50846	-0.50846	-0.50846	0.0584058	-0.50846	-0.50846	-0.50846	-0.50846	0.658638	0.291413	0.63257	-0.50846	-0.50846	-0.50846	1.12266	-0.50846	-0.50846	-0.50846	1.56908	-0.50846	2	2	-0.50846	0.408624	-0.50846	0.411639	1.50552	0.197762	-0.50846	-0.50846	-0.50846	-0.50846
HNRNPA2B1--NM-002137--chr7---	-0.84541	-0.84541	-0.84541	0.438183	-0.240276	-0.84541	-0.84541	-0.84541	-0.84541	0.225451	0.0154457	0.386879	-0.84541	-0.84541	0.118876	-0.84541	-0.84541	-0.84541	1.92996	-0.84541	-0.471892	-0.84541	-0.0828903	-0.84541	0.0474766	-0.84541	0.703665	-0.84541	-0.84541	-0.84541	-0.84541	0.229361	0.130098	-0.84541	0.157314	-0.84541	-0.258743	0.508075	-0.84541	-0.84541	-0.84541	0.213181	-0.239141	-0.84541	-0.0100098	-0.84541	-0.215359	-0.84541	-0.84541
HNRNPA3--NM-194247--chr2--+	0.264522	-0.56937	-0.56937	-0.56937	0.221595	-0.56937	-0.56937	0.490004	-0.56937	-0.56937	-0.56937	-0.56937	-0.56937	-0.56937	-0.56937	-0.56937	-0.56937	-0.56937	-0.56937	-0.56937	-0.56937	-0.56937	-0.0190726	-0.56937	-0.56937	-0.56937	-0.56937	-0.56937	0.529138	-0.56937	-0.56937	-0.56937	-0.56937	-0.56937	0.741281	-0.56937	-0.56937	0.905089	-0.56937	-0.56937	0.220482	1.28793	-0.56937	-0.56937	-0.56937	-0.56937	0.254165	-0.56937	-0.56937
HNRNPDL--NM-001207000--chr4---	-0.524508	-0.524508	-0.524508	-0.524508	-0.524508	2	0.569444	0.632808	0.406	-0.524508	-0.524508	-0.524508	-0.524508	1.90316	-0.524508	-0.524508	-0.524508	-0.524508	-0.524508	-0.524508	0.00885099	-0.524508	-0.524508	-0.524508	-0.524508	-0.524508	-0.524508	-0.524508	-0.524508	-0.524508	-0.524508	-0.524508	-0.524508	-0.524508	0.907317	-0.524508	-0.0719491	0.513204	-0.524508	-0.524508	-0.524508	-0.524508	-0.524508	-0.524508	-0.524508	-0.524508	0.375164	-0.524508	-0.524508
HP--NM-001126102--chr16--+	2	1.6354	2	1.08897	1.21885	0.214455	1.38299	0.528352	1.07633	1.49484	1.29298	0.820075	2	1.38814	0.227947	-0.817411	1.70025	-0.202367	2	1.86458	1.52913	1.22174	0.968684	2	1.81558	0.786349	1.56117	0.654941	0.151381	1.71249	1.44598	1.13836	1.91388	-0.313756	0.780775	1.03806	1.25886	0.498974	1.50731	1.03112	1.36621	1.63396	2	0.52898	0.770146	1.85098	1.48255	-1.39447	1.29831
HP--NM-005143--chr16--+	2	0.569038	2	1.10073	0.337709	1.44704	0.605902	0.874595	0.920773	-0.321494	0.000721417	1.10908	2	0.87691	0.642674	0.341484	1.01435	0.907756	2	1.43087	1.45239	0.945235	0.65312	2	1.57937	1.32045	0.60401	0.345717	0.330434	2	1.98988	0.7093	2	-0.248085	1.0542	0.126963	1.42742	1.20207	0.636417	0.208717	0.524777	0.338179	0.33974	0.734692	0.244512	1.39421	1.06749	-0.160931	2
HPD--NM-002150--chr12---	1.29614	-0.0988712	1.12538	2	1.58263	-0.874145	-0.147415	-0.874145	0.853611	-0.874145	1.52749	2	-0.874145	-0.874145	-0.874145	-0.874145	0.882682	-0.874145	2	0.81172	0.243606	0.165847	0.563918	2	1.75381	-0.874145	0.826216	0.341879	-0.0769197	1.01631	1.47788	1.60961	1.9875	0.219821	1.13527	0.424423	0.846884	0.599975	2	0.733774	1.58047	1.41142	1.22251	-0.874145	1.34574	-0.874145	1.27792	-0.874145	-0.874145
HPX--NM-000613--chr11---	2	1.54264	1.71337	0.689527	1.13553	-1.04085	0.245288	0.966436	1.91195	0.627673	0.633866	-0.117834	2	1.64414	0.498774	-1.04085	1.46633	-1.04085	1.82441	1.72521	1.76138	0.810555	0.37222	1.76387	2	0.899015	1.06495	0.476482	0.82485	1.1462	2	0.92035	2	-1.04085	-0.289784	0.779427	1.47052	0.695002	1.83871	-0.0785513	1.23812	0.899571	1.59472	0.521184	0.336174	2	1.07322	0.447477	2
HRG--NM-000412--chr3--+	1.05462	-0.161625	1.10447	2	1.73894	2	0.721101	0.797722	1.31332	0.0871429	1.98868	1.46697	-0.963396	-0.963396	-0.0174095	-0.963396	-0.963396	-0.963396	1.75931	0.780088	0.393374	0.112141	0.0665199	1.68878	0.936406	0.319297	1.00561	0.696166	1.48017	1.90106	2	-0.359284	1.73772	-0.963396	2	-0.168212	1.52837	0.561106	-0.963396	1.02758	0.978077	0.726764	0.728614	0.338469	1.33236	1.28933	1.26222	-0.963396	1.86722
HRSP12--NM-005836--chr8---	1.05244	0.232722	-0.773918	0.807076	0.529438	-0.773918	0.169692	1.4372	-0.773918	-0.773918	0.286393	1.63966	-0.773918	-0.773918	-0.773918	-0.773918	-0.773918	-0.773918	2	0.211679	-0.313858	0.00169899	1.09331	1.46091	0.325845	0.83653	2	1.72118	-0.773918	-0.773918	2	1.37571	1.20488	0.646522	1.25209	0.224452	0.493894	1.02005	2	-0.773918	0.527804	-0.0282547	0.531618	2	1.49045	-0.773918	0.577081	-0.773918	-0.773918
HSBP1--NM-001537--chr16--+	-0.533542	-0.533542	2	2	-0.533542	-0.533542	-0.533542	0.69702	0.455858	-0.533542	-0.533542	-0.533542	-0.533542	-0.533542	-0.533542	-0.533542	-0.533542	-0.533542	-0.533542	-0.533542	-0.533542	1.13104	-0.533542	-0.533542	-0.00407905	-0.533542	-0.533542	-0.533542	-0.533542	-0.533542	-0.533542	-0.533542	0.94758	-0.533542	0.988902	-0.533542	-0.0523407	1.17918	-0.533542	0.610859	-0.533542	-0.533542	-0.533542	1.48133	0.17299	-0.533542	0.42307	-0.533542	-0.533542
HSD17B6--NM-003725--chr12--+	-0.58701	-0.58701	2	1.38823	-0.58701	-0.58701	0.591905	0.66019	1.73428	-0.58701	-0.58701	-0.58701	2	-0.58701	-0.58701	-0.58701	-0.58701	-0.58701	2	2	0.464227	1.67079	1.41014	2	1.43039	-0.58701	1.79676	-0.58701	0.706263	-0.58701	-0.58701	-0.58701	2	-0.58701	-0.58701	-0.58701	1.54415	1.80433	-0.58701	0.572864	1.5963	1.04199	0.34594	-0.58701	1.92862	2	0.382536	-0.58701	-0.58701
HSP90AA1--NM-005348--chr14---	-0.914292	-0.825625	-1.22977	-0.857427	-0.706499	2	-0.85093	-0.552895	-0.907532	-0.128221	-0.516501	-0.260763	-1.22977	-1.22977	1.517	-1.22977	-1.22977	-1.22977	0.142657	-0.350937	-0.372326	-0.918376	-1.22977	-0.33253	-1.22977	-0.583207	-0.969145	-1.22977	-1.22977	-1.22977	-1.22977	-0.698295	-0.435322	-1.22977	-1.22977	-1.22977	-0.720769	0.596226	-1.22977	-1.22977	-0.930953	-0.930402	-0.92997	1.06217	-0.664733	-0.0942418	-1.22977	-1.22977	-1.22977
HSP90AB1--NM-001271971--chr6--+	-0.620062	-0.620062	-0.620062	-0.620062	0.0338776	2	0.788216	-0.620062	-0.620062	-0.620062	-0.620062	-0.620062	-0.620062	-0.620062	-0.620062	-0.620062	-0.620062	-0.620062	-0.620062	-0.620062	-0.620062	-0.620062	-0.620062	-0.620062	0.0727651	-0.620062	-0.620062	0.192421	0.288143	-0.620062	-0.620062	0.0454014	-0.620062	-0.620062	-0.620062	-0.620062	0.0139214	1.25437	-0.620062	0.194463	0.0329576	0.0341615	-0.620062	-0.620062	-0.117189	-0.620062	-0.620062	-0.620062	-0.620062
HSP90AB1--NM-001271972--chr6--+	-0.468868	-0.468868	-0.468868	-0.468868	-0.468868	2	-0.468868	-0.468868	-0.468868	-0.468868	-0.468868	-0.468868	-0.468868	1.92553	-0.468868	-0.468868	-0.468868	-0.468868	-0.468868	0.658105	-0.468868	-0.468868	-0.468868	-0.468868	-0.468868	-0.468868	0.273414	-0.468868	-0.468868	-0.468868	-0.468868	-0.468868	-0.468868	-0.468868	-0.468868	-0.468868	-0.0225096	0.334565	2	-0.468868	-0.468868	-0.468868	-0.468868	-0.468868	-0.468868	-0.468868	-0.468868	-0.468868	-0.468868
HSP90AB1--NM-007355--chr6--+	-0.714192	-0.714192	-0.714192	-0.714192	-0.714192	2	-0.0590867	-0.714192	-0.714192	-0.714192	-0.714192	-0.714192	-0.714192	-0.714192	-0.714192	-0.714192	-0.714192	-0.714192	-0.714192	-0.714192	-0.394793	-0.175717	-0.354183	-0.714192	-0.714192	-0.714192	-0.714192	-0.714192	0.0044604	-0.714192	-0.714192	-0.187618	-0.714192	-0.714192	-0.714192	-0.714192	0.165992	1.09878	-0.714192	-0.714192	-0.714192	-0.714192	-0.714192	0.420579	-0.316274	-0.714192	-0.714192	-0.714192	-0.714192
HSP90B1--NM-003299--chr12--+	1.47102	0.955593	1.27806	-0.174242	0.541212	1.5491	0.859183	-0.112595	0.230055	0.166503	-0.0585996	1.1191	-0.981344	-0.981344	-0.981344	-0.981344	-0.981344	-0.981344	-0.981344	-0.12362	0.034337	0.921276	0.409793	-0.981344	-0.024266	-0.157037	1.17004	0.392728	-0.0805024	-0.981344	-0.981344	-0.981344	0.0642952	-0.981344	0.0934676	0.486	0.821719	0.579873	-0.981344	0.395752	0.539465	-0.332424	-0.331489	1.25401	0.770943	1.48005	0.592029	-0.981344	-0.981344
HSPA1A--NM-005345-3--chr6--+	-1.04639	-1.34591	-0.356291	-0.74328	-0.849108	1.56345	-0.986234	-0.9654	-0.81532	-0.300082	-1.34591	-0.425919	-1.34591	-1.34591	0.625969	-1.34591	-1.34591	-1.34591	-1.34591	-0.970229	-1.34591	-0.657073	-1.34591	-1.34591	-0.822926	-1.34591	-1.09847	-1.34591	-0.951344	-1.34591	-1.34591	-0.84132	-1.34591	-1.34591	-1.34591	-1.34591	-0.494128	-0.492149	-1.34591	-0.742744	-1.06221	-1.06169	-1.06128	0.0768135	-1.34591	-1.34591	-0.830948	-0.413029	-1.34591
HSPA1B--NM-005346--chr6--+	-0.90983	-0.90983	-0.90983	-0.90983	-0.90983	1.63644	-0.90983	-0.90983	-0.90983	-0.90983	-0.90983	-0.90983	-0.90983	-0.90983	0.833282	-0.90983	-0.90983	1.40739	-0.90983	-0.90983	-0.90983	-0.90983	-0.90983	-0.90983	-0.90983	-0.90983	-0.90983	-0.90983	-0.90983	-0.90983	0.672016	-0.90983	-0.90983	-0.90983	-0.90983	-0.90983	-0.385759	0.0815843	-0.90983	-0.90983	-0.90983	-0.90983	-0.90983	0.420626	-0.90983	-0.90983	-0.90983	-0.90983	-0.90983
HSPA5--NM-005347--chr9---	-0.737853	0.128429	-0.737853	-0.737853	-0.0964376	2	0.0741874	0.121223	-0.737853	1.10631	-0.737853	-0.737853	-0.737853	-0.737853	-0.737853	-0.737853	-0.737853	-0.737853	2	0.11032	-0.737853	0.424222	-0.737853	-0.737853	0.840123	0.648046	0.904099	-0.737853	0.152958	-0.737853	1.89027	-0.737853	-0.737853	0.484532	-0.737853	-0.737853	0.132854	0.581011	-0.737853	0.0610725	-0.737853	-0.0961591	-0.737853	0.668761	-0.244611	-0.737853	-0.070026	-0.737853	-0.737853
HSPA6--NM-002155--chr1--+	-0.524849	-0.524849	-0.524849	-0.524849	-0.524849	-0.524849	-0.524849	-0.524849	-0.524849	-0.524849	-0.524849	-0.524849	1.95647	-0.524849	-0.524849	-0.524849	-0.524849	-0.524849	-0.524849	-0.524849	-0.524849	-0.524849	-0.524849	-0.524849	-0.524849	0.251247	-0.524849	-0.524849	-0.524849	-0.524849	-0.524849	-0.524849	-0.524849	-0.524849	-0.524849	-0.524849	-0.524849	-0.524849	-0.524849	0.23582	-0.524849	-0.524849	-0.524849	-0.524849	-0.524849	-0.524849	-0.524849	-0.524849	-0.524849
HSPA8--NM-006597--chr11---	-0.722311	-0.722311	-0.722311	-0.722311	-0.722311	1.73639	0.0755918	0.121808	-0.722311	-0.722311	0.174272	1.85789	-0.722311	-0.722311	0.281995	-0.722311	-0.722311	-0.722311	-0.722311	0.111096	-0.333291	-0.0664605	1.05939	-0.722311	-0.359119	0.0786263	-0.722311	-0.722311	-0.722311	-0.722311	-0.722311	-0.0809562	0.950929	-0.722311	-0.722311	0.121896	-0.392225	0.896177	-0.722311	0.0627052	0.378406	-0.722311	-0.0908798	0.659814	-0.237656	-0.722311	-0.722311	-0.722311	-0.722311
HSPA8--NM-153201--chr11---	0.157677	-0.594863	-0.594863	0.293322	-0.594863	-0.594863	-0.594863	1.01975	-0.594863	-0.594863	-0.594863	-0.594863	-0.594863	-0.594863	1.28148	-0.594863	-0.594863	-0.594863	-0.594863	0.349029	-0.594863	-0.594863	0.304586	-0.594863	-0.594863	-0.594863	-0.594863	-0.594863	-0.594863	-0.594863	-0.594863	-0.594863	-0.594863	-0.594863	-0.594863	-0.594863	-0.594863	-0.346311	-0.594863	-0.594863	-0.594863	-0.594863	-0.594863	0.970491	-0.594863	-0.594863	-0.594863	-0.594863	-0.594863
HSPB1--NM-001540--chr7--+	-0.475387	-0.475387	-0.475387	-0.475387	-0.475387	2	-0.475387	-0.475387	-0.475387	-0.475387	-0.475387	-0.475387	-0.475387	-0.475387	-0.475387	-0.475387	-0.475387	-0.475387	-0.475387	-0.475387	-0.475387	-0.475387	-0.475387	-0.475387	-0.475387	-0.475387	-0.475387	-0.475387	-0.475387	-0.475387	-0.475387	-0.475387	0.837914	-0.475387	-0.475387	-0.475387	-0.0487091	0.876105	-0.475387	-0.475387	-0.475387	-0.475387	-0.475387	1.31118	-0.475387	-0.475387	-0.475387	-0.475387	-0.475387
HSPD1--NM-002156--chr2---	0.153752	0.357702	-0.571907	0.284552	0.116397	-0.571907	0.299495	0.349969	-0.571907	-0.571907	-0.571907	-0.571907	-0.571907	-0.571907	-0.571907	-0.571907	-0.571907	-0.571907	-0.571907	-0.571907	-0.147053	-0.571907	-0.571907	-0.571907	-0.571907	-0.571907	-0.571907	-0.571907	-0.571907	-0.571907	-0.571907	0.128526	0.537676	-0.571907	0.568632	0.350065	-0.571907	0.41833	1.9777	-0.571907	-0.571907	0.116696	-0.571907	-0.571907	-0.0426083	-0.571907	-0.571907	-0.571907	-0.571907
HSPD1--NM-199440--chr2---	-0.528886	-0.528886	-0.528886	-0.528886	0.300548	2	0.521188	-0.528886	-0.528886	0.938902	-0.528886	-0.528886	-0.528886	-0.528886	-0.528886	2	2	-0.528886	-0.528886	-0.528886	-0.0169192	-0.528886	0.516271	-0.528886	0.997962	-0.528886	1.20895	-0.528886	-0.528886	-0.528886	-0.528886	-0.528886	0.808205	-0.528886	1.72571	-0.528886	0.275236	0.66439	-0.528886	1.79444	-0.528886	0.300908	0.302104	-0.528886	-0.528886	-0.528886	0.334701	-0.528886	-0.528886
HSPE1--NM-002157--chr2--+	0.0739282	-0.452557	-1.0991	0.921615	0.263383	-1.0991	-0.49304	0.823265	-0.583589	-1.0991	-0.418086	0.451089	-1.0991	-1.0991	-0.336263	1.08464	-1.0991	-1.0991	1.92707	0.306833	0.705245	-0.231795	0.393326	0.336278	-0.0619907	0.263358	-0.0960909	-0.504323	-0.434251	1.69385	1.66174	-1.0991	1.28737	-1.0991	0.202157	-0.0161551	-0.284813	1.00322	0.674151	-1.0991	-1.0991	-0.26166	0.470171	-1.0991	0.194142	0.717484	-0.231384	-1.0991	-1.0991
HSPH1--NM-001286503--chr13---	-0.336542	-0.336542	-0.336542	-0.336542	-0.336542	2	-0.336542	-0.336542	-0.336542	-0.336542	-0.336542	-0.336542	-0.336542	-0.336542	1.87111	-0.336542	-0.336542	-0.336542	-0.336542	-0.336542	-0.336542	-0.336542	-0.336542	-0.336542	-0.336542	-0.336542	-0.336542	-0.336542	-0.336542	-0.336542	-0.336542	-0.336542	-0.336542	-0.336542	-0.336542	-0.336542	-0.336542	-0.0441025	-0.336542	-0.336542	-0.336542	-0.336542	-0.336542	-0.336542	-0.336542	-0.336542	-0.336542	-0.336542	-0.336542
HSPH1--NM-001286505--chr13---	-0.396912	-0.396912	-0.396912	-0.396912	-0.396912	2	-0.396912	-0.396912	-0.396912	-0.396912	-0.396912	-0.396912	-0.396912	-0.396912	1.09267	-0.396912	-0.396912	-0.396912	-0.396912	-0.396912	-0.396912	-0.396912	-0.396912	-0.396912	-0.396912	-0.396912	-0.396912	-0.396912	-0.396912	-0.396912	-0.396912	-0.396912	-0.396912	-0.396912	-0.396912	-0.396912	-0.396912	0.220198	-0.396912	-0.396912	-0.396912	-0.396912	-0.396912	-0.396912	0.321923	-0.396912	-0.396912	-0.396912	-0.396912
HYPK--NM-016400--chr15--+	0.295908	-0.558423	-0.558423	1.16047	0.858619	-0.558423	-0.558423	1.27458	-0.558423	0.875598	0.594374	-0.558423	2	1.71826	1.57172	-0.558423	-0.558423	-0.558423	2	0.513143	0.356385	-0.558423	-0.558423	1.87134	-0.558423	0.471395	0.147365	-0.558423	-0.558423	-0.558423	2	1.7787	1.59297	-0.558423	-0.558423	-0.558423	0.2272	0.785896	-0.558423	-0.558423	-0.558423	-0.558423	-0.558423	1.21867	-0.558423	-0.558423	0.285297	-0.558423	2
ID2--NM-002166--chr2--+	0.083338	-0.609858	-0.609858	-0.609858	0.047654	-0.609858	-0.609858	-0.609858	-0.609858	-0.609858	0.32551	-0.609858	-0.609858	-0.609858	-0.609858	-0.609858	-0.609858	-0.609858	-0.609858	-0.609858	-0.20401	-0.609858	-0.609858	-0.609858	-0.230955	0.225727	0.767769	0.207064	-0.609858	-0.609858	-0.609858	-0.609858	-0.609858	-0.609858	0.479658	-0.609858	-0.609858	0.33608	-0.609858	-0.609858	-0.609858	0.0479394	-0.609858	-0.609858	0.297852	-0.609858	0.0747284	-0.609858	-0.609858
ID3--NM-002167--chr1---	-0.496048	-0.496048	-0.496048	-0.496048	-0.496048	-0.496048	-0.496048	-0.496048	-0.496048	-0.496048	0.412488	-0.496048	-0.496048	-0.496048	-0.496048	-0.496048	-0.496048	-0.496048	-0.496048	-0.496048	-0.496048	-0.496048	-0.496048	-0.496048	-0.496048	-0.496048	-0.496048	-0.496048	-0.496048	-0.496048	-0.496048	0.153856	-0.496048	-0.496048	-0.496048	-0.496048	-0.496048	-0.273665	-0.496048	0.299433	-0.496048	-0.496048	-0.496048	-0.496048	-0.496048	-0.496048	-0.496048	-0.496048	-0.496048
IER3--NM-003897--chr6---	-0.531243	-0.531243	-0.531243	-0.531243	-0.531243	-0.531243	0.269883	-0.531243	-0.531243	-0.531243	-0.531243	-0.531243	-0.531243	-0.531243	0.47712	-0.531243	-0.531243	-0.531243	-0.531243	-0.531243	-0.531243	-0.531243	-0.531243	-0.531243	-0.166584	0.27293	-0.531243	-0.531243	-0.531243	-0.531243	-0.531243	-0.531243	1.14876	-0.531243	-0.531243	-0.531243	-0.531243	0.0653031	-0.531243	0.256944	0.100661	-0.531243	-0.531243	-0.531243	-0.531243	-0.531243	-0.531243	-0.531243	-0.531243
IFITM1--NM-003641--chr11--+	-0.718771	-0.718771	-0.718771	-0.216452	-0.718771	-0.718771	-0.718771	-0.178085	-0.718771	0.441914	-0.718771	-0.718771	-0.718771	-0.718771	-0.0754794	-0.718771	-0.718771	-0.718771	-0.718771	-0.718771	-0.263039	-0.718771	-0.718771	-0.718771	-0.29107	-0.205744	-0.718771	-0.718771	-0.718771	-0.718771	-0.718771	-0.307962	-0.718771	-0.718771	-0.718771	-0.718771	-0.170764	-0.578201	0.776593	-0.718771	-0.718771	-0.314901	-0.718771	-0.718771	-0.718771	-0.718771	-0.718771	-0.718771	-0.718771
IFITM2--NM-006435--chr11--+	0.690351	-1.03248	1.52784	0.902341	-0.525669	-1.03248	-0.39085	0.759999	0.911207	-1.03248	0.175562	-1.03248	-1.03248	-1.03248	-0.22487	-1.03248	0.518625	-1.03248	-1.03248	0.101239	0.419746	-0.11427	-0.679877	-1.03248	0.978332	0.409946	0.264903	-0.402795	-0.328609	0.636606	-1.03248	-0.516737	2	-1.03248	-0.192678	-1.03248	-0.1704	0.49055	1.65968	-1.03248	0.155802	0.157589	-0.144749	-1.03248	-0.642748	0.890728	-0.113835	-1.03248	0.612575
IFITM3--NM-021034--chr11---	0.958386	-0.215518	1.87158	-0.279056	0.186421	0.43984	0.235068	1.15559	0.550739	-1.13574	-0.173065	0.172097	-1.13574	-1.13574	-0.492166	-1.13574	0.69927	-1.13574	-1.13574	0.638083	0.462849	0.377851	-0.435067	1.06514	1.24607	0.238891	0.33189	-0.280177	-0.192914	-1.13574	2	0.823442	1.76506	-1.13574	0.278034	-1.13574	0.668474	0.36865	-1.13574	-0.278294	-1.13574	0.703207	0.188196	0.256098	-0.197808	1.05229	0.225033	-1.13574	-1.13574
IGFBP1--NM-000596--chr7--+	1.90828	-0.663048	-0.663048	1.76646	1.37451	2	0.4359	1.30044	0.27171	-0.663048	0.571813	-0.663048	-0.663048	1.77571	-0.663048	-0.663048	-0.663048	-0.663048	-0.663048	1.88629	0.316883	1.88313	1.51156	1.93968	0.61776	1.21251	-0.663048	-0.663048	-0.663048	-0.663048	-0.663048	1.40372	0.736276	-0.663048	-0.663048	-0.663048	0.813473	0.379404	-0.663048	0.418152	0.203769	2	0.20662	1.24055	1.97409	2	-0.663048	-0.663048	2
IGFBP2--NM-000597--chr2--+	1.17245	1.59014	-0.54529	0.620883	0.391919	-0.54529	-0.54529	2	0.463956	-0.54529	0.787973	1.36324	2	2	-0.54529	-0.54529	-0.54529	-0.54529	-0.54529	1.55121	1.27964	1.15269	1.80261	2	2	1.47973	1.85386	-0.54529	-0.54529	-0.54529	-0.54529	2	2	-0.54529	1.00769	-0.54529	1.33772	0.0734253	-0.54529	-0.54529	1.09153	-0.54529	0.393678	-0.54529	1.98657	2	1.15349	2	-0.54529
IGFBP7--NM-001253835--chr4---	-0.3935	-0.3935	-0.3935	-0.3935	-0.3935	-0.3935	-0.3935	-0.3935	-0.3935	-0.3935	-0.3935	-0.3935	-0.3935	-0.3935	-0.3935	-0.3935	-0.3935	-0.3935	-0.3935	-0.3935	-0.3935	-0.3935	0.257591	-0.3935	-0.3935	-0.3935	-0.3935	-0.3935	-0.3935	-0.3935	-0.3935	-0.3935	-0.3935	-0.3935	-0.3935	-0.3935	-0.3935	-0.3935	-0.3935	-0.3935	-0.3935	-0.3935	-0.3935	-0.3935	-0.3935	-0.3935	-0.3935	-0.3935	-0.3935
IGFBP7--NM-001553--chr4---	-0.562568	-0.562568	-0.562568	-0.562568	-0.562568	-0.562568	-0.562568	-0.562568	-0.00159265	-0.562568	-0.562568	-0.562568	-0.562568	-0.562568	-0.562568	-0.562568	-0.562568	-0.562568	-0.562568	-0.562568	-0.562568	-0.562568	-0.200138	0.999402	-0.562568	-0.562568	-0.562568	-0.562568	-0.562568	-0.562568	-0.562568	-0.562568	-0.562568	-0.562568	-0.562568	-0.562568	-0.562568	-0.381174	-0.562568	-0.562568	-0.562568	-0.562568	-0.562568	-0.562568	-0.562568	-0.562568	-0.562568	-0.562568	-0.562568
IL32--NM-001012631--chr16--+	-0.499712	-0.499712	-0.499712	-0.499712	-0.499712	-0.499712	-0.499712	1.20954	0.314011	-0.499712	-0.499712	-0.499712	-0.499712	-0.499712	-0.499712	-0.499712	1.81294	-0.499712	-0.499712	-0.499712	1.45697	0.286626	-0.499712	-0.499712	0.300865	0.460579	0.667843	-0.499712	-0.499712	-0.499712	-0.499712	-0.499712	-0.499712	-0.499712	0.752408	-0.499712	-0.499712	-0.000861774	-0.499712	0.44149	-0.499712	-0.499712	-0.499712	-0.499712	-0.499712	-0.499712	0.287045	-0.499712	-0.499712
IL7R--NR-120485--chr5--+	-0.501795	-0.501795	-0.501795	-0.501795	-0.501795	-0.501795	-0.501795	-0.501795	-0.501795	-0.501795	-0.501795	-0.501795	-0.501795	-0.501795	-0.501795	-0.501795	-0.501795	-0.501795	-0.501795	-0.501795	-0.501795	-0.501795	-0.501795	-0.501795	-0.501795	-0.501795	-0.501795	-0.501795	-0.501795	-0.501795	-0.501795	-0.501795	-0.501795	-0.501795	-0.501795	-0.501795	-0.501795	-0.314312	-0.501795	-0.501795	-0.501795	-0.501795	-0.501795	-0.501795	-0.501795	-0.501795	-0.501795	-0.501795	-0.501795
ISG15--NM-005101--chr1--+	0.321263	-0.460306	-0.460306	-0.460306	0.836049	-0.460306	0.478235	-0.460306	-0.460306	-0.460306	-0.460306	-0.460306	2	-0.460306	-0.460306	-0.460306	1.80856	2	-0.460306	-0.460306	-0.00271775	-0.460306	-0.460306	-0.460306	-0.0330982	-0.460306	-0.460306	-0.460306	-0.460306	-0.460306	-0.460306	-0.460306	-0.460306	-0.460306	-0.460306	-0.460306	-0.460306	-0.202166	-0.460306	-0.460306	0.834423	0.83655	-0.460306	-0.460306	-0.460306	-0.460306	0.311556	-0.460306	-0.460306
ISG20--NM-002201--chr15--+	-0.397883	-0.397883	2	-0.397883	-0.397883	-0.397883	-0.397883	-0.397883	-0.397883	-0.397883	-0.397883	-0.397883	-0.397883	-0.397883	-0.397883	-0.397883	-0.397883	-0.397883	-0.397883	-0.397883	0.126563	-0.397883	-0.397883	-0.397883	-0.397883	-0.397883	-0.397883	-0.397883	-0.397883	-0.397883	-0.397883	-0.397883	-0.397883	-0.397883	-0.397883	-0.397883	0.047113	0.163029	-0.397883	-0.397883	-0.397883	-0.397883	-0.397883	-0.397883	-0.397883	-0.397883	-0.397883	-0.397883	-0.397883
ITIH1--NM-001166436--chr3--+	2	-0.0469043	1.21478	1.41255	0.542743	-0.84588	1.89108	0.492266	1.19554	0.855003	-0.00430558	-0.84588	2	2	0.709182	1.85272	1.84197	-0.84588	-0.84588	1.96628	0.685978	0.225907	1.15512	1.79705	1.691	1.44566	1.11626	-0.110875	-0.0242817	-0.84588	-0.84588	1.53578	0.7247	0.965476	-0.84588	0.909242	0.927764	0.931886	1.34545	0.410079	0.54115	1.68669	1.99778	-0.84588	1.29295	2	0.890073	-0.84588	1.07432
ITIH2--NM-002216--chr10--+	0.420704	0.101049	-0.794187	2	1.62381	1.79172	1.45564	0.705179	0.858163	2	1.65494	-0.794187	1.89904	-0.794187	0.948229	-0.794187	-0.794187	-0.794187	-0.794187	0.68859	1.10516	1.15013	1.07969	1.19331	0.641849	1.77344	1.61454	-0.794187	0.126397	-0.794187	1.92178	-0.119653	1.47755	0.469054	1.0076	-0.794187	0.333317	1.67488	2	1.42888	1.37361	0.762289	1.84751	0.659441	0.745186	-0.794187	1.91427	1.38236	-0.794187
ITIH3--NM-002217--chr3--+	1.57545	2	1.20299	0.802054	1.08021	2	0.424046	-0.0528795	0.925663	0.199167	0.984493	-0.837427	-0.837427	0.808294	0.0960028	-0.837427	-0.837427	-0.837427	2	1.49438	0.989074	-0.227862	1.2865	1.77955	1.84427	0.42824	1.45917	-0.109641	1.8182	2	-0.837427	1.32489	1.52958	-0.837427	0.133211	-0.837427	1.77936	0.472748	-0.837427	0.406197	1.49208	1.67027	2	-0.837427	1.28039	1.3854	1.35864	-0.837427	1.95562
ITIH4--NM-001166449--chr3---	1.89067	2	-1.24542	0.713277	1.43259	0.315727	0.849218	0.918397	1.16975	-0.0948584	0.875895	1.06089	1.04672	0.834061	0.113882	-1.24542	0.572779	1.1565	1.72132	1.28063	1.03995	0.389148	1.25788	1.23081	1.50598	0.738273	1.04271	0.826483	-0.023947	1.39093	2	0.954476	0.901564	-0.482784	1.07304	1.29745	1.55958	0.404813	1.29689	0.829509	1.14409	1.00921	1.53291	0.980325	0.481329	2	0.981793	0.680824	0.0534987
ITM2B--NM-021999--chr13--+	0.269285	-0.590257	-0.590257	-0.590257	-0.590257	-0.590257	-0.590257	-0.590257	-0.590257	0.85251	-0.590257	1.07	-0.590257	-0.590257	1.55287	-0.590257	-0.590257	-0.590257	-0.590257	-0.590257	-0.0870179	-0.590257	-0.590257	-0.590257	-0.590257	-0.590257	-0.590257	-0.590257	-0.590257	-0.590257	-0.590257	0.239405	-0.590257	-0.590257	-0.590257	-0.590257	0.200157	0.582677	2	-0.590257	0.22389	-0.590257	0.226567	1.19767	0.0366961	-0.590257	0.258609	-0.590257	-0.590257
JUN--NM-002228--chr1---	0.316305	-0.683215	-0.683215	-0.683215	-0.683215	2	-0.683215	-0.683215	-0.683215	-0.683215	0.616674	-0.683215	-0.683215	-0.683215	1.1692	-0.683215	-0.683215	-0.683215	-0.683215	-0.683215	-0.346601	-0.683215	-0.683215	-0.683215	-0.36895	-0.683215	-0.683215	-0.0056539	0.0741719	-0.683215	-0.683215	-0.683215	0.195911	-0.683215	-0.683215	-0.683215	-0.683215	2	-0.683215	-0.683215	-0.683215	-0.683215	-0.136846	0.512719	-0.683215	-0.683215	-0.683215	-0.683215	-0.683215
JUNB--NM-002229--chr19--+	-0.618191	-0.618191	-0.618191	0.797863	-0.618191	-0.618191	-0.618191	-0.618191	-0.618191	-0.618191	0.331501	-0.618191	-0.618191	-0.618191	-0.618191	-0.618191	-0.618191	-0.618191	-0.618191	0.875161	-0.618191	-0.618191	-0.618191	-0.618191	-0.618191	-0.618191	-0.0367512	-0.618191	-0.618191	-0.618191	-0.618191	-0.618191	-0.618191	-0.618191	-0.618191	-0.618191	-0.618191	0.48928	-0.618191	-0.618191	-0.618191	0.0496799	-0.618191	-0.618191	-0.618191	-0.618191	-0.618191	-0.618191	-0.618191
KHK--NM-006488--chr2--+	0.286987	1.32723	-0.608843	1.76938	-0.608843	-0.608843	0.466908	-0.608843	0.978088	-0.608843	0.599951	-0.608843	-0.608843	-0.608843	-0.608843	-0.608843	-0.608843	-0.608843	2	0.514775	0.350402	-0.608843	0.46187	1.93894	1.70887	0.470999	0.131229	2	0.571259	2	-0.608843	0.255846	1.64706	-0.608843	1.70088	0.529336	1.09838	1.70315	2	0.449534	-0.608843	0.241241	1.38876	-0.608843	1.97263	-0.608843	1.45228	-0.608843	-0.608843
KLF6--NR-027653--chr10---	-0.533767	-0.533767	-0.533767	-0.533767	0.90821	-0.533767	0.510202	-0.533767	-0.533767	-0.533767	0.639315	-0.533767	-0.533767	-0.533767	0.780259	-0.533767	-0.533767	-0.533767	-0.533767	0.556655	-0.533767	0.960212	0.0399393	-0.533767	-0.533767	-0.533767	1.19397	-0.533767	-0.533767	-0.533767	-0.533767	0.305376	0.795551	-0.533767	-0.533767	-0.533767	-0.101885	1.82988	-0.533767	-0.533767	-0.533767	-0.533767	-0.533767	-0.533767	-0.533767	-0.533767	0.3248	-0.533767	-0.533767
KLRB1--NM-002258--chr12---	-0.456844	-0.456844	-0.456844	-0.456844	-0.456844	-0.456844	-0.456844	-0.456844	-0.456844	-0.456844	-0.456844	-0.456844	-0.456844	-0.456844	-0.456844	-0.456844	-0.456844	-0.456844	-0.456844	-0.456844	-0.456844	-0.456844	-0.456844	-0.456844	-0.456844	-0.456844	-0.456844	-0.456844	-0.456844	-0.456844	-0.456844	-0.456844	-0.456844	-0.456844	-0.456844	-0.456844	-0.456844	-0.456844	-0.456844	-0.456844	-0.456844	-0.456844	-0.456844	-0.456844	-0.456844	-0.456844	0.197431	-0.456844	-0.456844
KNG1--NM-000893--chr3--+	0.478319	2	2	1.50358	-0.0839983	-0.759195	-0.759195	-0.759195	0.923924	-0.759195	0.201331	0.61577	-0.759195	1.13777	0.316737	-0.759195	2	-0.759195	-0.759195	0.751193	0.783948	1.51488	0.09161	-0.759195	1.91969	0.0988639	-0.171122	0.671139	-0.759195	-0.759195	-0.759195	0.440014	2	-0.759195	-0.759195	0.14522	2	0.865947	1.74186	0.0818074	0.420024	0.826264	0.828128	-0.759195	1.06484	1.80298	0.464663	-0.759195	1.43242
KNG1--NM-001166451--chr3--+	1.57169	1.52335	2	1.39061	1.28866	-0.902061	1.6618	-0.0977191	0.905513	1.30866	0.965827	-0.902061	2	0.785183	1.13787	-0.902061	2	-0.902061	1.85229	-0.107927	0.653022	0.185976	0.38594	0.898626	1.57955	0.807147	0.876852	0.37014	1.56991	-0.902061	-0.902061	1.08866	0.692331	0.242443	-0.902061	0.879671	1.44053	0.731975	1.32249	1.11205	1.28656	1.06457	0.809614	-0.902061	1.10414	1.37685	1.55181	-0.902061	1.04725
KRT18--NM-000224--chr12--+	1.1054	-0.696882	-0.696882	-0.696882	-0.0884629	2	-0.696882	0.679355	-0.696882	-0.696882	-0.696882	0.542098	-0.696882	-0.696882	-0.696882	-0.696882	-0.696882	-0.696882	-0.696882	-0.696882	0.255822	-0.696882	-0.696882	1.1274	0.200852	0.0763142	-0.16697	-0.696882	0.148103	1.30683	-0.696882	-0.0777412	1.76165	-0.696882	-0.696882	-0.696882	-0.378229	1.28943	2	-0.696882	-0.0893189	-0.696882	-0.696882	-0.696882	-0.696882	-0.696882	1.08849	-0.696882	-0.696882
KRT18--NM-199187--chr12--+	1.1619	0.716047	-0.532609	-0.532609	-0.532609	2	-0.532609	1.55867	0.462987	-0.532609	-0.532609	-0.532609	-0.532609	2	-0.532609	-0.532609	-0.532609	-0.532609	2	-0.532609	0.511099	-0.532609	0.110616	-0.532609	0.831558	-0.532609	-0.532609	0.616072	-0.532609	2	2	-0.532609	-0.532609	-0.532609	0.99937	1.55886	0.363711	0.57769	-0.532609	-0.532609	0.390624	0.392326	-0.532609	-0.532609	0.178348	-0.532609	1.1432	-0.532609	-0.532609
KRT8--NM-002273--chr12---	0.172993	0.39659	2	0.316393	0.132039	2	-0.622571	-0.622571	0.190041	-0.622571	0.450928	-0.622571	-0.622571	-0.622571	-0.622571	-0.622571	-0.622571	-0.622571	-0.622571	-0.622571	-0.156789	0.744584	0.328302	-0.622571	0.176913	0.336409	-0.622571	-0.622571	1.13904	-0.622571	-0.622571	0.145337	1.38084	-0.622571	-0.622571	-0.622571	1.10444	1.93295	-0.622571	-0.622571	0.130978	0.697507	0.133455	1.03228	-0.0422833	-0.622571	0.745232	-0.622571	-0.622571
KRTCAP2--NM-173852--chr1---	1.53462	-0.762049	-0.762049	0.0786287	0.419393	-0.762049	-0.762049	0.766198	-0.762049	-0.762049	-0.762049	-0.762049	1.98305	-0.762049	1.94568	-0.762049	-0.762049	-0.762049	-0.762049	-0.762049	0.782064	-0.762049	-0.292	2	-0.762049	0.697759	-0.173607	-0.762049	0.176267	-0.762049	2	-0.074522	2	-0.762049	0.357475	-0.762049	-0.107046	0.749094	-0.762049	0.672335	-0.762049	-0.762049	-0.08516	2	0.170661	1.80174	-0.762049	-0.762049	1.43094
LAMTOR2--NM-014017--chr1--+	0.475451	-0.513774	2	0.653758	0.424528	-0.513774	-0.513774	0.742935	-0.513774	-0.513774	0.821043	2	-0.513774	-0.513774	0.981419	-0.513774	2	-0.513774	-0.513774	0.726987	0.0653913	1.18618	0.13903	2	0.026939	1.51361	1.88818	-0.513774	-0.513774	2	-0.513774	-0.513774	1.97732	-0.513774	1.04102	0.743066	0.395894	1.04281	-0.513774	0.654944	0.423208	-0.513774	-0.513774	-0.513774	0.207771	-0.513774	0.463165	-0.513774	2
LAMTOR4--NM-001008395--chr7--+	-0.576822	-0.576822	-0.576822	0.452195	-0.576822	-0.576822	-0.576822	0.530792	-0.576822	-0.576822	-0.576822	2	-0.576822	-0.576822	0.740982	-0.576822	-0.576822	-0.576822	-0.576822	-0.576822	-0.576822	-0.576822	-0.576822	-0.576822	0.299338	-0.576822	-0.576822	-0.576822	-0.576822	2	-0.576822	0.264733	-0.576822	-0.576822	-0.576822	-0.576822	-0.576822	1.1236	-0.576822	-0.576822	-0.576822	-0.576822	-0.576822	-0.576822	1.34371	-0.576822	0.284213	-0.576822	-0.576822
LAMTOR5--NM-006402--chr1---	-0.581477	-0.581477	-0.581477	0.438494	-0.581477	-0.581477	-0.581477	1.2727	-0.581477	-0.581477	0.584636	2	-0.581477	-0.581477	-0.581477	-0.581477	-0.581477	-0.581477	-0.581477	-0.581477	-0.075511	-0.581477	-0.0111796	-0.581477	-0.581477	0.460236	-0.581477	-0.581477	-0.581477	2	2	0.25268	2	-0.581477	0.77681	-0.581477	0.21322	0.597813	-0.581477	-0.581477	-0.581477	0.238591	-0.581477	-0.581477	0.0488733	-0.581477	0.271989	-0.581477	-0.581477
LAPTM4A--NM-014713--chr2---	0.864329	-0.600344	-0.600344	-0.600344	-0.600344	-0.600344	0.411373	-0.600344	-0.600344	-0.600344	-0.600344	-0.600344	2	-0.600344	1.50031	-0.600344	-0.600344	-0.600344	-0.600344	-0.600344	-0.600344	-0.600344	-0.0443619	1.79579	-0.600344	-0.600344	-0.600344	0.392537	-0.600344	-0.600344	-0.600344	0.212875	0.687906	-0.600344	-0.600344	-0.600344	0.174405	1.18706	-0.600344	0.395033	-0.600344	-0.600344	-0.600344	-0.600344	-0.600344	-0.600344	0.231698	-0.600344	-0.600344
LDHA--NM-001165415--chr11--+	0.895812	-0.595935	-0.595935	-0.595935	-0.595935	-0.595935	-0.595935	0.494167	0.280532	-0.595935	1.3441	-0.595935	-0.595935	-0.595935	-0.595935	-0.595935	-0.595935	-0.595935	2	-0.595935	-0.0935519	0.251035	0.816103	-0.595935	0.266373	1.16267	1.10937	-0.595935	-0.595935	-0.595935	-0.595935	-0.595935	-0.595935	-0.595935	-0.595935	1.24528	0.193135	0.17135	-0.595935	-0.595935	-0.595935	-0.595935	0.2195	-0.595935	0.527682	-0.595935	0.87935	-0.595935	-0.595935
LDHB--NM-002300--chr12---	-0.446381	-0.446381	-0.446381	-0.446381	-0.446381	-0.446381	-0.446381	-0.446381	-0.446381	-0.446381	-0.446381	-0.446381	-0.446381	-0.446381	-0.446381	-0.446381	-0.446381	-0.446381	-0.446381	-0.446381	-0.446381	-0.446381	-0.446381	-0.446381	-0.446381	-0.446381	-0.446381	-0.446381	-0.446381	-0.446381	-0.446381	0.486278	-0.446381	-0.446381	-0.446381	-0.446381	0.0336305	0.158668	-0.446381	-0.446381	-0.446381	-0.446381	-0.446381	-0.446381	-0.446381	-0.446381	-0.446381	-0.446381	-0.446381
LEAP2--NM-052971--chr5--+	0.272881	-0.00346677	-0.777414	1.6415	0.224661	2	0.848626	1.24933	0.292813	0.236668	1.62011	1.07825	1.55093	1.64909	1.1691	-0.777414	1.82624	-0.777414	2	1.23055	1.2669	0.260799	0.842586	1.78273	1.29035	0.460766	1.61929	-0.0654337	1.30343	2	1.57059	1.33794	2	-0.777414	0.780264	1.24948	0.815528	2	1.34527	0.827754	0.223405	1.50424	0.855879	0.479273	1.13692	-0.777414	1.15336	-0.777414	1.08264
LEPROTL1--NM-015344--chr8--+	-0.428863	-0.428863	-0.428863	0.621465	-0.428863	-0.428863	-0.428863	-0.428863	-0.428863	-0.428863	-0.428863	-0.428863	-0.428863	-0.428863	-0.428863	-0.428863	-0.428863	-0.428863	-0.428863	-0.428863	-0.428863	0.449536	-0.428863	-0.428863	-0.428863	-0.428863	-0.428863	-0.428863	-0.428863	-0.428863	-0.428863	-0.428863	-0.428863	-0.428863	-0.428863	-0.428863	-0.428863	0.128391	-0.428863	-0.428863	-0.428863	-0.428863	-0.428863	-0.428863	-0.428863	-0.428863	0.450004	-0.428863	-0.428863
LGALS1--NM-002305--chr22--+	-0.142873	-0.617351	-0.617351	-0.617351	-0.167298	-0.617351	-0.617351	0.400664	0.22317	-0.617351	-0.617351	-0.617351	-0.617351	-0.617351	0.0998131	-0.617351	-0.617351	-0.617351	1.44676	-0.617351	-0.617351	-0.617351	-0.617351	-0.617351	-0.617351	-0.617351	-0.617351	-0.617351	-0.617351	0.86481	-0.617351	-0.617351	0.577491	0.240344	-0.617351	-0.0145121	-0.617351	-0.193078	-0.617351	-0.617351	-0.167931	-0.167102	-0.617351	-0.617351	-0.617351	-0.617351	-0.617351	-0.617351	-0.617351
LGALS3--NM-002306--chr14--+	-0.524316	-0.524316	-0.524316	-0.524316	-0.524316	-0.524316	-0.524316	-0.524316	-0.524316	-0.524316	0.49233	-0.524316	-0.524316	-0.524316	-0.524316	-0.524316	-0.524316	-0.524316	-0.524316	-0.524316	-0.083202	-0.524316	-0.524316	-0.524316	-0.112489	-0.524316	-0.524316	-0.524316	-0.524316	1.82923	-0.524316	-0.524316	-0.524316	-0.524316	0.659872	-0.524316	-0.524316	1.42016	-0.524316	-0.524316	-0.524316	-0.524316	-0.524316	-0.524316	-0.524316	-0.524316	-0.524316	-0.524316	-0.524316
LGALS4--NM-006149--chr19---	-0.0926543	0.668567	1.41772	0.0255075	1.02152	2	-0.7482	1.45096	0.413076	-0.7482	-0.7482	-0.7482	2	-0.7482	0.242644	-0.7482	2	-0.7482	2	-0.7482	-0.364395	-0.101141	1.50636	2	0.598895	-0.7482	1.09366	0.0243512	0.115368	1.29957	1.79955	-0.115443	2	-0.7482	1.81389	0.0846904	0.309473	2	-0.7482	-0.7482	0.337762	-0.7482	0.340943	0.615397	0.425911	-0.7482	1.07643	-0.7482	2
LIME1--NM-001305655--chr20--+	0.874784	0.500824	2	2	1.27375	-0.546502	1.12348	0.492111	1.78754	-0.546502	1.86542	1.03265	2	-0.546502	-0.546502	2	1.82681	-0.546502	-0.546502	-0.546502	0.963479	-0.546502	-0.00698953	1.77865	0.59771	0.438979	0.1289	1.09624	-0.546502	2	2	1.69001	2	2	-0.546502	0.492219	0.205297	0.184541	-0.546502	0.41939	1.27167	0.229299	-0.546502	-0.546502	1.5484	2	-0.546502	1.99981	-0.546502
LSM3--NM-014463--chr3--+	-0.570943	-0.570943	-0.570943	1.73212	-0.570943	-0.570943	0.470811	-0.570943	-0.570943	-0.570943	-0.570943	2	-0.570943	-0.570943	0.740295	-0.570943	-0.570943	-0.570943	-0.570943	0.517166	-0.570943	0.919866	0.0015459	-0.570943	-0.0967541	-0.570943	0.700475	-0.570943	-0.570943	2	2	-0.570943	0.755554	-0.570943	-0.570943	-0.570943	-0.139977	0.794129	-0.570943	-0.570943	-0.570943	-0.570943	0.253463	-0.570943	0.565036	-0.570943	0.285802	-0.570943	-0.570943
LSM7--NM-016199--chr19---	0.499475	-0.460564	-0.460564	-0.460564	-0.460564	-0.460564	-0.460564	-0.460564	-0.460564	-0.460564	-0.460564	-0.460564	-0.460564	-0.460564	-0.460564	-0.460564	-0.460564	-0.460564	2	-0.460564	0.101514	-0.460564	0.17298	-0.460564	-0.460564	-0.460564	-0.460564	0.670828	-0.460564	2	-0.460564	-0.460564	-0.460564	-0.460564	1.04836	-0.460564	-0.460564	0.849509	2	-0.460564	0.448773	-0.460564	-0.460564	-0.460564	-0.460564	-0.460564	0.487551	-0.460564	2
LTB--NM-002341--chr6---	-0.310806	-0.310806	-0.310806	-0.310806	-0.310806	-0.310806	-0.310806	-0.310806	-0.310806	-0.310806	-0.310806	-0.310806	-0.310806	-0.310806	-0.310806	-0.310806	-0.310806	-0.310806	-0.310806	-0.310806	-0.310806	-0.310806	-0.310806	-0.310806	-0.310806	-0.310806	-0.310806	-0.310806	-0.310806	-0.310806	-0.310806	-0.310806	-0.310806	-0.310806	-0.310806	-0.310806	-0.310806	-0.310806	-0.310806	-0.310806	-0.310806	-0.310806	-0.310806	-0.310806	-0.310806	-0.310806	-0.310806	-0.310806	-0.310806
LTB--NM-009588-6--chr6---	-0.324924	-0.324924	-0.324924	-0.324924	-0.324924	-0.324924	-0.324924	-0.324924	-0.324924	-0.324924	-0.324924	-0.324924	-0.324924	-0.324924	-0.324924	-0.324924	-0.324924	-0.324924	-0.324924	-0.324924	-0.324924	-0.324924	-0.324924	-0.324924	-0.324924	-0.324924	-0.324924	-0.324924	-0.324924	-0.324924	-0.324924	-0.324924	-0.324924	-0.324924	-0.324924	-0.324924	-0.324924	-0.324924	-0.324924	-0.324924	-0.324924	-0.324924	-0.324924	-0.324924	-0.324924	-0.324924	-0.324924	-0.324924	-0.324924
LUC7L3--NM-006107--chr17--+	-0.437186	-0.437186	-0.437186	-0.437186	-0.437186	2	-0.437186	-0.437186	-0.437186	-0.437186	-0.437186	-0.437186	-0.437186	-0.437186	-0.437186	-0.437186	-0.437186	-0.437186	-0.437186	-0.437186	-0.437186	-0.437186	-0.437186	-0.437186	0.115988	-0.437186	-0.437186	-0.437186	-0.437186	-0.437186	-0.437186	-0.437186	1.11027	-0.437186	-0.437186	-0.437186	-0.437186	0.196526	-0.437186	-0.437186	-0.437186	-0.437186	-0.437186	-0.437186	-0.437186	-0.437186	-0.437186	-0.437186	-0.437186
LUM--NM-002345--chr12---	-0.510617	-0.510617	2	-0.510617	-0.510617	-0.510617	-0.510617	-0.510617	-0.510617	-0.510617	-0.510617	-0.510617	-0.510617	-0.510617	0.817253	-0.510617	-0.510617	-0.510617	-0.510617	-0.510617	-0.510617	-0.510617	-0.510617	-0.510617	-0.510617	-0.510617	-0.510617	-0.510617	-0.510617	-0.510617	-0.510617	-0.510617	-0.510617	-0.510617	-0.510617	-0.510617	-0.510617	-0.510617	2	-0.510617	-0.510617	-0.510617	-0.510617	-0.510617	-0.510617	-0.510617	-0.510617	-0.510617	-0.510617
LYZ--NM-000239--chr12--+	-0.486082	-0.486082	-0.486082	-0.486082	-0.486082	-0.486082	-0.486082	-0.486082	-0.486082	-0.486082	-0.486082	-0.486082	-0.486082	-0.486082	0.631324	-0.486082	-0.486082	-0.486082	-0.486082	-0.486082	-0.486082	-0.486082	-0.486082	-0.486082	-0.486082	-0.486082	-0.486082	-0.486082	-0.486082	-0.486082	-0.486082	-0.486082	0.644328	-0.486082	-0.486082	-0.486082	-0.486082	1.31467	-0.486082	-0.486082	-0.486082	-0.486082	-0.486082	-0.486082	-0.486082	-0.486082	-0.486082	-0.486082	-0.486082
MALAT1--NR-002819--chr11--+	-1.37463	-0.444709	0.190266	-0.51358	-1.39154	1.30701	-0.261528	-0.451867	-0.141045	-0.556102	-0.399479	-0.427481	-1.70314	-1.70314	1.18728	-0.281737	-1.70314	0.167121	-1.70314	-1.2911	-0.591537	-0.0321182	-1.16255	-1.70314	-0.320682	-0.642584	-0.780145	-0.278382	-1.27039	-0.676958	-1.70314	-0.3549	-1.20083	-0.749062	-0.419224	-0.998246	-0.836972	1.60596	-1.70314	0.321111	-1.15894	-0.369184	-1.15735	-1.01981	-0.576578	-1.70314	0.696674	-0.679979	-1.70314
MGMT--NM-002412--chr10--+	1.65796	-0.559639	-0.559639	-0.559639	1.02292	2	0.586109	0.652473	2	-0.559639	-0.559639	1.2833	-0.559639	-0.559639	-0.559639	-0.559639	2	-0.559639	-0.559639	0.637091	0.857478	1.63464	0.0699987	2	0.399183	1.3958	0.838699	0.564778	-0.559639	-0.559639	-0.559639	1.04773	2	-0.559639	-0.559639	-0.559639	1.51157	1.46456	-0.559639	-0.559639	-0.559639	1.56544	0.347064	-0.559639	0.1363	-0.559639	1.63559	-0.559639	-0.559639
MGP--NM-000900--chr12---	-0.493963	-0.493963	-0.493963	-0.493963	-0.493963	-0.493963	-0.493963	-0.493963	-0.493963	-0.493963	-0.493963	-0.493963	-0.493963	-0.493963	-0.493963	-0.493963	-0.493963	-0.493963	-0.493963	-0.493963	-0.493963	-0.493963	-0.118402	-0.493963	-0.493963	-0.493963	-0.493963	-0.493963	-0.493963	-0.493963	-0.493963	-0.493963	-0.493963	-0.493963	-0.493963	-0.493963	-0.211243	-0.305996	-0.493963	-0.493963	-0.493963	-0.493963	-0.493963	-0.493963	-0.493963	-0.493963	-0.493963	-0.493963	-0.493963
MGST1--NM-020300--chr12--+	1.45678	0.0971557	1.51251	0.0266275	0.361345	-0.799133	0.630019	0.0896995	-0.799133	1.10891	-0.799133	-0.799133	-0.799133	-0.799133	-0.799133	-0.799133	-0.799133	-0.799133	2	-0.799133	0.71758	0.403195	1.07695	-0.799133	1.46466	0.0442302	1.16664	0.606704	0.122534	-0.799133	2	1.11484	0.962739	0.465593	-0.799133	1.16976	0.719666	1.52599	-0.799133	-0.799133	0.756833	0.759172	-0.134255	2	0.117026	-0.799133	1.14825	-0.799133	-0.799133
MGST2--NM-002413--chr4--+	0.379461	-0.562587	-0.562587	1.93833	0.999947	-0.562587	-0.562587	0.634188	-0.562587	-0.562587	-0.562587	1.25704	2	-0.562587	-0.562587	-0.562587	-0.562587	-0.562587	2	-0.562587	1.75121	0.367264	0.987628	-0.562587	-0.0476611	0.572966	-0.562587	-0.562587	-0.562587	-0.562587	-0.562587	1.02444	-0.562587	-0.562587	-0.562587	-0.562587	0.957335	1.99867	-0.562587	-0.562587	-0.562587	-0.562587	0.332643	-0.562587	0.124546	-0.562587	1.60487	-0.562587	2
MGST3--NM-004528--chr1--+	-0.0798983	0.107225	-0.745689	1.02183	0.73668	-0.745689	0.0538204	0.10013	0.828547	-0.745689	-0.745689	-0.745689	-0.745689	-0.745689	-0.745689	-0.745689	-0.745689	-0.745689	-0.745689	0.666991	0.697626	1.10671	-0.306324	2	0.186127	0.056861	-0.195659	-0.745689	-0.745689	1.33409	-0.745689	-0.103043	0.272351	-0.745689	0.300753	0.682925	-0.414938	0.552824	1.59357	-0.745689	-0.745689	-0.745689	-0.745689	1.43066	-0.260059	1.65074	1.10746	-0.745689	-0.745689
MIF--NM-002415--chr22--+	0.845424	-1.1447	1.79108	1.22008	0.230375	1.53246	-1.1447	0.795431	-1.1447	-0.289724	0.00691368	1.15453	-1.1447	0.901095	0.791604	-1.1447	1.52775	-1.1447	1.07116	0.778557	1.22002	-0.641934	0.715862	0.303944	0.401444	0.23035	0.0920821	-1.1447	1.22263	1.67406	0.834906	1.60202	1.61031	-1.1447	0.168583	0.56418	0.402167	1.34012	1.92468	-1.1447	0.435358	-0.661351	0.232334	0.946076	0.160494	-1.1447	-0.641666	-1.1447	1.15898
MINOS1--NM-001032363--chr1--+	0.652776	-0.710598	-0.710598	0.214997	0.0332683	2	0.231147	0.972019	-0.710598	-0.710598	-0.710598	0.804205	-0.710598	-0.710598	-0.710598	-0.710598	1.56601	-0.710598	-0.710598	1.89591	0.454198	0.0634858	0.579927	-0.710598	0.386992	-0.710598	-0.710598	-0.710598	-0.710598	1.73918	-0.710598	0.0463769	0.488555	-0.710598	0.52201	-0.710598	0.299184	0.818925	-0.710598	0.215937	-0.710598	-0.710598	0.0346643	0.92069	0.316326	2	-0.710598	-0.710598	-0.710598
MPC2--NR-026550--chr1---	0.35751	0.0426649	1.43508	1.65335	0.693412	-0.839101	1.01346	1.09773	0.788387	0.316253	0.717108	-0.839101	1.8136	-0.839101	0.877097	-0.839101	1.15904	-0.839101	2	1.07834	0.183222	-0.1597	1.36925	1.11849	0.76708	1.68989	0.528821	0.543957	0.0676317	1.31103	1.836	-0.839101	0.894223	-0.839101	0.242739	1.09789	-0.206145	1.20945	1.57929	-0.0258958	-0.18714	-0.839101	-0.184996	-0.839101	0.67711	-0.839101	-0.159338	-0.839101	2
MPHOSPH8--NM-017520--chr13--+	-0.579483	-0.579483	-0.579483	1.08262	0.204092	-0.579483	0.412534	-0.579483	-0.579483	-0.579483	-0.579483	1.01618	-0.579483	-0.579483	-0.579483	-0.579483	-0.579483	-0.579483	-0.579483	-0.579483	-0.579483	-0.579483	0.779932	-0.579483	0.250689	-0.579483	0.102984	0.394065	-0.579483	-0.579483	-0.579483	-0.579483	0.683683	-0.579483	-0.579483	-0.579483	-0.169093	0.159207	2	-0.579483	-0.579483	-0.579483	0.205563	-0.579483	0.0230787	-0.579483	0.236358	-0.579483	-0.579483
MRPL40--NM-003776--chr22--+	0.49403	-0.499896	2	0.673185	1.14869	-0.499896	0.693652	-0.499896	-0.499896	-0.499896	-0.499896	-0.499896	2	-0.499896	-0.499896	-0.499896	-0.499896	-0.499896	-0.499896	0.746761	0.0820215	-0.499896	-0.499896	2	0.0433865	0.698191	0.321216	-0.499896	-0.499896	-0.499896	-0.499896	0.459478	1.01989	-0.499896	-0.499896	0.762917	0.414095	0.388861	-0.499896	-0.499896	1.71052	-0.499896	-0.499896	2	-0.499896	-0.499896	0.481685	-0.499896	-0.499896
MRPL51--NM-016497--chr12---	1.67303	0.396652	2	1.98115	0.119003	-0.672966	-0.672966	-0.672966	1.30124	2	-0.672966	-0.672966	-0.672966	-0.672966	-0.672966	-0.672966	-0.672966	-0.672966	2	1.09864	0.22109	0.151175	-0.12197	1.70168	0.495601	0.333491	0.0168117	-0.672966	1.17586	-0.672966	2	-0.672966	-0.672966	-0.672966	1.47979	0.387864	-0.25818	0.466411	-0.672966	-0.672966	0.117889	-0.672966	-0.672966	1.06381	0.420365	2	0.151614	-0.672966	-0.672966
MRPL54--NM-172251--chr19--+	0.26723	-0.628498	-0.628498	-0.628498	-0.628498	2	1.78232	0.509433	-0.628498	-0.628498	0.580159	2	2	1.75851	-0.628498	-0.628498	-0.628498	-0.628498	-0.628498	-0.628498	-0.104072	0.255634	-0.0373939	-0.628498	-0.13889	-0.628498	1.88819	0.427105	1.96484	-0.628498	2	1.39441	-0.628498	-0.628498	0.779344	0.509552	0.816691	0.391833	-0.628498	-0.628498	0.219925	0.221489	0.222715	-0.628498	1.34461	-0.628498	0.256105	-0.628498	-0.628498
MRPL57--NM-024026--chr13--+	0.829659	-0.647035	2	1.60798	-0.647035	2	-0.647035	0.432068	-0.647035	-0.647035	-0.647035	0.993676	-0.647035	-0.647035	0.636847	-0.647035	-0.647035	-0.647035	-0.647035	1.15527	1.86522	0.812672	1.08094	-0.647035	0.206572	0.376865	0.597858	-0.647035	0.471931	-0.647035	-0.647035	0.172858	1.492	-0.647035	0.688025	-0.647035	0.446678	0.689558	2	-0.647035	-0.647035	-0.647035	-0.647035	1.11984	0.874315	-0.647035	0.191836	-0.647035	1.96816
MRPS24--NM-032014--chr7---	0.791113	-0.63363	-0.63363	-0.63363	0.14372	-0.63363	0.350506	1.12473	0.20347	-0.63363	0.472219	-0.63363	2	-0.63363	-0.63363	-0.63363	-0.63363	-0.63363	-0.63363	-0.63363	-0.153812	-0.63363	-0.0928052	1.69718	0.797341	-0.63363	0.0434147	1.01311	0.44597	-0.63363	2	0.747013	2	-0.63363	-0.63363	-0.63363	0.421606	0.815449	-0.63363	-0.63363	-0.63363	0.144058	0.145179	2	-0.0358557	-0.63363	-0.63363	-0.63363	-0.63363
MT1E--NM-175617--chr16--+	0.990901	0.211954	2	1.21922	0.921975	-0.969454	0.501815	2	0.591175	0.521324	-0.231837	0.0864231	1.13727	0.487284	-0.143213	2	-0.969454	-0.969454	-0.969454	0.553335	0.516273	-0.0300613	0.329503	-0.969454	0.444839	0.150872	0.357859	1.00795	-0.249345	-0.969454	-0.969454	1.11801	2	-0.969454	-0.110278	0.864514	0.882403	0.516772	1.78481	-0.323623	0.504697	0.922533	-0.0612433	-0.969454	0.762669	-0.969454	-0.4296	-0.969454	2
MT1F--NM-005949--chr16--+	2	-0.583718	-0.583718	0.416563	1.70425	-0.583718	1.14748	1.80109	0.917627	0.838864	0.559883	2	-0.583718	-0.583718	0.697285	-0.583718	-0.583718	-0.583718	-0.583718	1.21455	0.675064	0.872716	1.43018	1.82666	1.39397	-0.583718	0.11644	0.415068	-0.583718	-0.583718	2	0.234336	0.712193	-0.583718	-0.583718	1.23483	0.195638	0.381694	-0.583718	-0.583718	0.219039	0.220519	0.824371	1.1792	0.0344637	-0.583718	-0.583718	-0.583718	-0.583718
MT1G--NM-001301267--chr16---	1.71226	0.26661	2	1.71526	2	-1.35209	0.630193	1.81601	0.995353	0.921605	-0.105475	1.69977	0.276399	0.34506	0.918151	-1.35209	-1.35209	-1.35209	1.18156	1.39975	0.554668	0.877976	1.1155	0.832043	0.938094	1.27788	-0.0227183	0.828141	0.464972	-1.35209	2	0.997376	1.80416	-1.35209	1.20291	-0.815221	0.79403	0.992771	0.776947	-0.501163	0.241832	0.75099	1.33249	1.22665	1.78282	1.54958	0.61831	-0.0360146	0.961798
MT1G--NM-005950--chr16---	1.5109	0.859732	1.14546	1.3376	1.02499	-0.856506	1.09422	1.68872	0.216863	-0.856506	0.513426	0.31387	2	1.57712	-0.856506	-0.856506	-0.856506	-0.856506	-0.856506	1.43135	0.262607	0.184754	0.935256	0.866767	0.711152	1.60323	1.39681	0.750167	0.485179	-0.856506	1.49839	0.801068	2	-0.856506	0.705744	1.17634	-0.0763221	0.526822	1.27241	-0.856506	0.491018	-0.281526	0.781581	1.12414	1.62345	1.32443	-0.856506	-0.856506	-0.856506
MT1H--NM-005951--chr16--+	0.889701	0.192285	-0.664166	2	2	-0.664166	1.48819	2	1.2445	-0.664166	-0.664166	0.627183	1.91238	1.11744	1.00276	-0.664166	-0.664166	-0.664166	2	1.55785	0.0517115	0.873365	2	2	0.00767973	2	0.664483	0.679185	0.216535	1.42423	-0.664166	0.845686	1.89828	-0.664166	-0.664166	0.770371	0.609919	0.862146	2	0.682141	-0.0309223	0.44516	1.86308	0.726484	1.45424	1.7422	-0.664166	-0.664166	-0.664166
MT1M--NM-176870--chr16--+	1.15175	-0.61564	-0.61564	1.80155	1.4372	-0.61564	0.937645	1.93534	0.161073	-0.61564	1.62774	1.72001	-0.61564	1.41078	-0.61564	-0.61564	-0.61564	-0.61564	-0.61564	1.50266	-0.170435	-0.61564	1.1913	2	0.946961	-0.61564	0.0125645	-0.61564	-0.61564	-0.61564	-0.61564	0.665407	1.85632	-0.61564	-0.61564	0.350495	0.0836231	0.580905	-0.61564	0.282755	0.104619	1.07802	0.647743	-0.61564	1.57562	-0.61564	-0.61564	-0.61564	1.72553
MT1X--NM-005952--chr16--+	1.33499	-0.959675	2	1.41465	1.40185	-0.959675	0.512379	1.69393	-0.959675	0.531899	0.276895	1.16418	-0.959675	-0.959675	0.404023	-0.959675	-0.959675	-0.959675	-0.959675	0.563928	0.383674	-0.0197806	1.59888	1.35802	0.700531	0.516814	0.761006	0.490589	-0.239181	-0.959675	1.16597	1.28502	1.82365	-0.959675	0.856336	-0.264777	0.595707	0.916393	-0.959675	0.141727	0.256669	-0.0521451	0.935179	0.178004	2	1.00895	0.29871	-0.959675	-0.959675
MT2A--NM-005953--chr16--+	1.46709	-0.855955	2	1.77045	0.691436	-0.732134	0.401298	1.35483	-0.0943216	0.336275	0.297343	0.522451	0.312004	0.209598	0.438261	-2	1.03388	0.0266888	1.5403	0.453942	0.608301	0.061123	0.939999	1.41972	0.452243	0.509632	1.02102	0.264341	0.120583	-0.398419	2	1.18767	2	-0.734608	0.681478	-0.00365816	0.0397784	0.378255	1.71471	-0.615561	0.657937	0.59347	0.130188	0.712373	0.96935	1.2969	0.225268	-0.402623	0.612817
MYEOV2--NM-001163424--chr2---	-0.507686	-0.507686	-0.507686	1.51919	-0.507686	-0.507686	-0.507686	1.65375	-0.507686	1.18328	0.851663	-0.507686	-0.507686	-0.507686	-0.507686	-0.507686	-0.507686	-0.507686	-0.507686	-0.507686	0.0821236	-0.507686	1.15008	-0.507686	0.0429646	-0.507686	0.324562	-0.507686	-0.507686	-0.507686	2	-0.507686	-0.507686	-0.507686	1.07568	-0.507686	0.4187	0.867024	-0.507686	-0.507686	-0.507686	-0.507686	-0.507686	-0.507686	0.22712	-0.507686	-0.507686	-0.507686	-0.507686
MYH9--NM-002473--chr22---	-0.503611	-0.503611	-0.503611	-0.503611	-0.503611	-0.503611	-0.503611	-0.503611	-0.503611	-0.503611	-0.503611	-0.503611	-0.503611	-0.503611	-0.503611	-0.503611	-0.503611	-0.503611	-0.503611	-0.503611	-0.503611	-0.503611	-0.503611	-0.503611	0.799058	-0.503611	-0.503611	0.593286	-0.503611	-0.503611	-0.503611	-0.503611	-0.503611	-0.503611	-0.503611	-0.503611	-0.0412252	0.766519	-0.503611	-0.503611	-0.503611	0.379627	-0.503611	-0.503611	0.175295	-0.503611	-0.503611	-0.503611	-0.503611
MYL12A--NM-006471--chr18--+	0.00221797	-0.98963	-0.98963	0.158263	-0.448471	-0.98963	-0.98963	-0.98963	-0.406876	-0.98963	0.300281	-0.98963	-0.98963	-0.98963	-0.98963	-0.98963	0.666595	-0.98963	1.49233	-0.27403	0.247174	-0.00919184	-0.307724	-0.98963	-0.98963	-0.98963	-0.98963	0.15676	-0.238057	-0.98963	-0.98963	0.571122	-0.98963	-0.98963	-0.98963	-0.264756	-0.255018	0.0191596	-0.98963	-0.31558	-0.449232	-0.448236	-0.98963	-0.98963	-0.573484	-0.98963	-0.426187	-0.98963	-0.98963
MYL12B--NM-033546--chr18--+	-0.00944075	-0.986988	-0.986988	0.144354	-0.986988	1.09373	-0.986988	-0.27264	0.0091112	-0.986988	0.983671	-0.986988	-0.986988	-0.986988	0.415025	-0.986988	0.645356	-0.986988	1.45919	-0.281705	-0.38488	-0.431965	-0.314913	-0.986988	-0.421914	-0.986988	-0.522453	-0.986988	-0.986988	-0.986988	-0.986988	-0.444232	0.429016	-0.986988	-0.103201	-0.986988	-0.469907	0.205956	0.988668	-0.986988	-0.986988	-0.0539598	-0.986988	0.182655	-0.986988	-0.986988	-0.0202283	-0.986988	0.744226
MYL6--NM-021019--chr12--+	0.365814	-0.225648	-0.951984	0.188774	-0.0115543	1.14605	-0.271127	0.643438	-0.372852	-0.951984	0.32991	0.789524	-0.951984	-0.951984	-0.0950016	-0.951984	-0.951984	-0.951984	-0.951984	-0.240832	0.0952102	-0.951984	-0.0189688	-0.951984	0.213121	0.210026	0.641044	-0.951984	0.303479	0.819139	-0.951984	-0.404711	0.891157	-0.951984	-0.951984	-0.231616	-0.037201	0.250888	1.04011	0.189788	-0.0127335	-0.0111905	-0.00998191	-0.951984	-0.538424	-0.951984	0.0228217	-0.951984	-0.951984
MYL6--NM-079423--chr12--+	0.0820292	-0.658335	-1.27877	-0.304338	-0.475457	-1.27877	-0.289474	0.345962	0.306463	-1.27877	-0.18378	-0.343285	0.587738	0.0118681	0.281653	-1.27877	-1.27877	-1.27877	1.6252	-0.671304	0.0375517	-0.446487	-0.699906	1.56384	-0.433121	-0.286184	-0.568967	-1.27877	-1.27877	0.234117	0.603499	-0.184996	0.811431	-1.27877	0.329317	0.0841456	-0.655165	0.989077	-1.27877	-1.27877	-0.476464	-0.475146	-0.818522	-0.271348	-0.925506	-1.27877	-0.446093	-1.27877	-1.27877
NA--NA--NA--NA	-0.768383	-0.768383	-0.768383	-0.768383	-0.768383	-0.768383	-0.768383	-0.768383	-0.768383	-0.768383	-0.768383	-0.768383	-0.768383	-0.768383	-0.768383	-0.768383	-0.768383	-0.768383	-0.768383	-0.768383	-0.768383	-0.768383	-0.768383	-0.768383	-0.768383	-0.768383	-0.768383	-0.768383	-0.768383	-0.768383	-0.768383	-0.768383	-0.768383	-0.768383	-0.768383	-0.768383	-0.768383	-0.768383	-0.768383	-0.768383	-0.768383	-0.768383	-0.768383	-0.768383	-0.768383	-0.768383	-0.768383	-0.768383	-0.768383
NACA--NM-001113202--chr12---	-0.139548	-1.22356	0.884451	-0.331132	-0.778957	0.645688	-0.560295	0.585915	-0.71407	-1.82599	0.227713	0.922712	0.728946	-0.572796	-0.653462	-1.82599	0.200671	-1.82599	0.219789	0.294396	-1.32244	-0.154315	0.964321	0.604748	-0.133953	-0.862202	-0.0771642	-0.332777	-1.2065	-0.356995	1.57235	-1.03375	0.717556	-1.82599	1.01749	-0.816926	-0.929789	1.16781	-1.82599	-0.576542	-1.04696	-0.365285	-0.363778	-0.847796	0.351587	-0.133338	-0.744011	-1.82599	-0.378145
NAP1L1--NM-001307924--chr12---	-0.533974	0.563353	-0.533974	-0.533974	-0.533974	-0.533974	-0.533974	0.554224	-0.533974	-0.533974	-0.533974	-0.533974	-0.533974	-0.533974	0.760729	-0.533974	-0.533974	-0.533974	-0.533974	-0.533974	-0.533974	-0.533974	0.031296	-0.533974	-0.0657645	-0.533974	-0.533974	-0.533974	-0.533974	-0.533974	-0.533974	-0.533974	-0.533974	-0.533974	-0.533974	0.554337	-0.533974	0.441763	-0.533974	-0.533974	-0.533974	0.278865	-0.533974	1.24779	-0.533974	-0.533974	-0.533974	-0.533974	-0.533974
NCL--NM-005381--chr2---	-0.0495478	-0.724128	-0.724128	0.0720451	-0.0842736	-0.724128	0.0859363	1.17406	-0.0350924	-0.724128	0.186121	-0.724128	1.87565	-0.724128	-0.724128	-0.724128	-0.724128	-0.724128	-0.724128	0.121982	0.521795	0.43512	-0.724128	2	-0.0462237	-0.724128	0.264522	-0.724128	-0.724128	-0.724128	-0.724128	-0.0729979	0.307352	-0.724128	-0.724128	-0.724128	-0.1038	0.196407	-0.724128	0.634321	-0.0851738	-0.724128	0.780109	-0.724128	0.159205	-0.724128	0.435669	1.3769	-0.724128
NDUFA1--NM-004541--chrX--+	0.755853	-0.846194	1.43119	0.983686	-0.192396	-0.846194	0.561779	0.0294662	-0.846194	-0.846194	-0.846194	1.27096	-0.846194	-0.846194	0.195639	-0.846194	-0.846194	-0.846194	-0.846194	-0.846194	0.648043	-0.165837	-0.0223533	-0.846194	0.357338	1.01456	-0.846194	-0.0338869	0.0618139	-0.846194	2	0.315009	1.39451	0.39979	0.237168	-0.846194	0.0413223	1.11854	-0.846194	-0.846194	-0.193316	-0.192112	-0.191169	1.40694	0.920033	-0.846194	0.338877	-0.846194	-0.846194
NDUFA11--NM-175614--chr19---	0.837933	-0.741507	1.50374	1.41864	1.09303	-0.741507	0.0745299	0.716507	-0.0473912	-0.741507	-0.741507	-0.741507	-0.741507	1.06942	0.285624	-0.741507	-0.741507	2	-0.741507	-0.741507	-0.013848	-0.741507	-0.741507	-0.741507	-0.0586044	-0.741507	0.254432	-0.741507	-0.741507	-0.741507	-0.741507	0.793194	2	-0.741507	1.51484	0.716639	-0.116605	0.700189	1.64611	0.0613504	0.384226	-0.096655	0.387524	0.67203	-0.245837	1.70446	-0.741507	-0.741507	-0.741507
NDUFA12--NM-018838--chr12---	0.290318	0.536307	2	-0.584916	0.866797	-0.584916	0.466102	0.526979	0.309073	-0.584916	-0.584916	1.10565	-0.584916	-0.584916	-0.584916	-0.584916	-0.584916	-0.584916	-0.584916	-0.584916	0.352275	-0.584916	-0.00733669	1.90429	-0.106511	0.470099	0.138141	-0.584916	-0.584916	-0.584916	-0.584916	1.39171	1.61912	-0.584916	-0.584916	-0.584916	0.219928	1.41326	-0.584916	-0.584916	-0.584916	-0.584916	0.246821	-0.584916	-0.584916	-0.584916	-0.584916	-0.584916	-0.584916
NDUFA13--NM-015965--chr19--+	0.573022	0.193371	1.73327	1.04799	0.508554	1.09438	0.123983	1.38721	0.312357	-0.0891821	-1.07178	0.0589414	1.18428	1.2794	1.15356	-1.07178	-1.07178	-1.07178	1.47484	0.873846	0.00941527	-0.493969	0.319253	1.95405	0.579124	0.127959	0.572973	-0.381905	-1.07178	-1.07178	1.20333	0.529633	2	-1.07178	-0.151703	-0.328023	0.340925	1.21799	0.985003	-1.07178	1.30256	0.509075	1.14111	1.33109	-0.305236	-1.07178	-0.0653238	-1.07178	0.730523
NDUFA2--NM-002488--chr5---	0.855	-0.652577	-0.652577	0.370918	0.785786	-0.652577	0.388776	0.449094	0.883611	-0.652577	0.517565	-0.652577	2	-0.652577	-0.652577	2	1.86483	-0.652577	-0.652577	-0.652577	0.635419	-0.652577	0.774446	-0.652577	0.86159	0.392736	0.063831	-0.652577	-0.652577	-0.652577	-0.652577	2	1.53119	-0.652577	0.710403	0.449208	1.00005	0.335241	2	-0.652577	-0.652577	0.170325	0.788191	1.15125	-0.652577	-0.652577	0.203838	-0.652577	-0.652577
NDUFA4--NM-002489--chr7---	0.334269	-0.217114	1.14716	1.06984	-0.846046	0.581132	0.331713	1.01907	-0.419244	0.0764019	-0.165405	1.0031	1.47973	-1.33798	-1.33798	-1.33798	0.897125	-1.33798	0.918209	0.385753	0.85737	0.671389	0.445703	0.859767	-0.127752	-0.275065	1.04952	0.0372296	-0.189582	-1.33798	2	0.642509	2	-1.33798	0.941594	0.637604	0.859614	1.43291	0.484233	0.0399745	0.270837	-0.182851	-0.181492	1.39812	0.564419	1.84231	-0.144719	-1.33798	-1.33798
NDUFA7--NM-005001--chr19---	-0.516995	-0.516995	2	1.42326	-0.516995	2	-0.516995	2	0.468022	-0.516995	1.66331	2	-0.516995	-0.516995	0.940602	-0.516995	2	-0.516995	-0.516995	-0.516995	0.915318	0.434872	-0.516995	-0.516995	1.73332	-0.516995	0.896338	-0.516995	0.753372	-0.516995	-0.516995	-0.516995	0.957565	-0.516995	-0.516995	-0.516995	-0.0379252	1.52891	2	-0.516995	1.62765	0.398111	-0.516995	-0.516995	0.186407	-0.516995	-0.516995	-0.516995	-0.516995
NDUFAB1--NM-005003--chr16---	0.106971	0.331123	-0.690569	0.250727	0.0659153	-0.690569	0.26715	1.02059	-0.690569	-0.690569	-0.690569	2	2	-0.690569	1.29797	-0.690569	-0.690569	-0.690569	-0.690569	-0.690569	-0.22363	0.0966454	0.262665	-0.690569	0.110901	0.270793	0.894426	-0.690569	-0.690569	2	2	0.0792462	1.90206	-0.690569	-0.690569	-0.690569	0.336342	1.00144	-0.690569	-0.690569	1.46018	-0.690569	-0.690569	-0.690569	-0.690569	-0.690569	-0.690569	-0.690569	-0.690569
NDUFB10--NM-004548--chr16--+	-0.768661	0.126722	1.54064	0.637597	-0.768661	1.81767	0.0706581	1.19808	0.88396	-0.768661	-0.768661	-0.768661	-0.768661	-0.768661	1.88833	-0.768661	2	2	2	1.17839	-0.768661	-0.0787678	0.381504	1.21917	0.209553	0.0738501	0.255693	0.0550323	-0.768661	-0.768661	-0.768661	1.14338	1.50345	-0.768661	0.329886	0.119366	0.131296	2	1.68708	-0.768661	0.389191	-0.768661	0.392583	-0.768661	0.146573	1.74709	-0.0783999	-0.768661	2
NDUFB11--NM-001135998--chrX---	0.0962422	-0.693056	-0.693056	0.894996	1.0643	2	-0.693056	-0.693056	1.17321	-0.693056	-0.693056	-0.693056	-0.693056	-0.693056	2	-0.693056	1.59825	-0.693056	-0.693056	0.296941	-0.230942	0.0860236	0.605797	1.55175	0.100132	-0.693056	1.22345	0.237121	0.346708	-0.693056	-0.693056	-0.693056	1.87279	-0.693056	0.547507	-0.693056	0.0327641	0.702554	-0.693056	-0.693056	-0.693056	-0.693056	-0.693056	0.948759	-0.117339	-0.693056	0.086439	-0.693056	-0.693056
NDUFB2--NM-004546--chr7--+	1.37891	-0.927131	-0.927131	1.86438	-0.927131	1.45233	-0.154944	1.23007	-0.270313	-0.927131	0.526717	1.04798	-0.927131	1.65557	1.51735	-0.927131	1.84412	-0.927131	1.87027	-0.120584	1.11688	0.177912	-0.15856	2	0.394262	-0.927131	1.09589	-0.927131	-0.927131	-0.927131	2	-0.306447	1.16325	-0.927131	1.20797	-0.927131	0.110362	1.06414	1.33219	-0.927131	0.806969	0.505087	0.811298	-0.927131	0.92588	2	-0.927131	-0.927131	-0.927131
NDUFB3--NM-002491--chr2--+	-0.592986	-0.592986	-0.592986	0.518231	-0.592986	-0.592986	-0.592986	-0.592986	-0.592986	-0.592986	-0.592986	1.2256	-0.592986	-0.592986	-0.592986	-0.592986	-0.592986	-0.592986	-0.592986	1.40472	1.14595	1.02497	0.532324	2	0.353164	-0.592986	0.786871	-0.592986	-0.592986	-0.592986	-0.592986	-0.592986	0.846648	-0.592986	2	0.603231	0.619301	1.24327	-0.592986	-0.592986	-0.592986	0.300445	-0.592986	1.36544	0.0937554	2	-0.592986	-0.592986	-0.592986
NDUFB4--NM-004547--chr3--+	-0.763475	-0.763475	-0.763475	0.728072	-0.0603041	-0.763475	0.126749	0.178313	0.989378	0.480875	0.236847	-0.763475	-0.763475	1.21208	1.62504	-0.763475	-0.763475	-0.763475	-0.763475	0.166361	-0.329444	0.510486	0.12258	1.34491	0.274068	-0.763475	-0.151038	-0.763475	-0.763475	-0.763475	-0.763475	0.485419	2	-0.763475	-0.763475	-0.763475	0.191064	1.14979	1.84121	-0.763475	0.885193	-0.0599988	-0.763475	0.778568	-0.763475	-0.763475	-0.0313496	-0.763475	1.51894
NDUFB7--NM-004146--chr19---	-0.8588	0.0178753	-0.8588	2	0.664866	-0.8588	-0.8588	0.0105823	-0.159797	0.289884	-0.8588	0.463043	-0.8588	0.964877	1.74268	-0.8588	-0.8588	-0.8588	2	0.593235	0.157621	0.317217	0.267334	1.08749	0.547463	1.35052	0.501225	0.955804	1.12252	1.27892	2	0.294078	2	-0.8588	2	0.0106728	0.445372	1.17793	1.54563	-0.0502896	0.663117	0.665406	0.667198	0.56469	0.0373113	-0.8588	-0.8588	1.27262	2
NDUFB8--NM-005004--chr10---	-0.0354155	-0.750911	-0.750911	0.688652	-0.0722475	-0.750911	-0.750911	0.158053	-0.0200834	-0.750911	-0.750911	-0.750911	2	-0.750911	0.330546	-0.750911	2	-0.750911	2	0.146518	0.311786	-0.0446787	-0.750911	1.28399	-0.359819	0.111554	-0.750911	-0.750911	-0.750911	2	-0.750911	-0.060288	2	-0.750911	-0.750911	-0.750911	0.612638	0.991908	1.76299	-0.750911	-0.0732024	-0.0719529	0.437835	-0.750911	-0.229026	1.82442	-0.750911	-0.750911	-0.750911
NDUFC1--NM-001184990--chr4---	0.146147	0.378772	2	1.51578	-0.681539	2	-0.681539	0.369951	-0.681539	0.707757	-0.681539	0.917188	-0.681539	-0.681539	-0.681539	-0.681539	2	-0.681539	-0.681539	0.356607	0.204738	0.135431	1.28524	-0.681539	0.150225	1.01477	1.32817	0.293877	0.408794	-0.681539	-0.681539	0.117374	2	-0.681539	1.45249	-0.681539	0.384188	1.20808	-0.681539	0.296328	0.102435	-0.681539	-0.681539	-0.681539	0.800882	-0.681539	-0.681539	-0.681539	-0.681539
NDUFC2--NM-004549--chr11---	0.450131	0.758689	1.59283	0.649769	0.391873	-0.818806	-0.818806	-0.818806	1.26505	-0.818806	-0.818806	-0.818806	1.99423	-0.818806	1.00112	-0.818806	1.30011	-0.818806	-0.818806	-0.818806	1.50136	0.435534	0.0536024	2	-0.0852938	-0.818806	-0.215801	-0.818806	-0.818806	-0.818806	-0.818806	1.17797	2	-0.818806	1.06314	-0.818806	-0.147593	1.6069	1.74576	0.651075	0.80447	-0.818806	1.94041	-0.818806	0.789048	-0.818806	-0.818806	-0.818806	2
NDUFS5--NM-001184979--chr1--+	-0.850743	-0.850743	-0.850743	-0.0655834	-0.850743	-0.850743	0.508141	0.576579	-0.850743	-0.850743	0.0469146	0.434227	-0.850743	-0.850743	0.80795	-0.850743	1.08045	-0.850743	2	-0.0163377	-0.461257	-0.194107	0.243977	1.04126	-0.182216	-0.0488462	0.124231	-0.850743	-0.850743	-0.850743	-0.850743	0.269975	2	-0.850743	0.194848	-0.00552453	0.0058302	1.2093	1.48662	-0.850743	-0.220627	0.945765	-0.850743	-0.850743	-0.850743	-0.850743	0.29301	-0.850743	-0.850743
NDUFS6--NM-004553--chr5--+	0.521161	0.175233	-0.793584	1.21412	1.82315	-0.793584	-0.793584	0.167173	1.3655	0.47583	0.226887	0.667189	-0.793584	-0.793584	-0.793584	-0.793584	-0.793584	-0.793584	-0.793584	-0.793584	0.603207	0.945671	1.00348	2	-0.380207	0.118025	1.04271	-0.793584	0.202665	1.56881	2	-0.0636086	2	-0.793584	1.1563	0.167273	1.03148	1.54831	-0.793584	-0.793584	0.459227	0.461285	0.892801	1.67851	0.196712	1.92849	0.506652	-0.793584	-0.793584
NDUFS7--NM-024407--chr19--+	-0.535315	-0.535315	2	0.612232	0.386925	-0.535315	-0.535315	-0.535315	-0.535315	-0.535315	-0.535315	-0.535315	-0.535315	-0.535315	0.934284	-0.535315	2	-0.535315	2	-0.535315	0.0339363	-0.535315	0.106314	-0.535315	-0.00385787	0.636694	0.267924	-0.535315	-0.535315	-0.535315	-0.535315	-0.535315	1.91313	-0.535315	-0.535315	-0.535315	0.716606	0.994619	-0.535315	-0.535315	-0.535315	-0.535315	0.388656	-0.535315	-0.535315	2	-0.535315	-0.535315	-0.535315
NDUFS8--NM-002496--chr11--+	-0.482237	-0.482237	-0.482237	-0.482237	0.471451	-0.482237	-0.482237	-0.482237	-0.482237	-0.482237	-0.482237	2	-0.482237	-0.482237	-0.482237	-0.482237	-0.482237	-0.482237	-0.482237	-0.482237	-0.482237	-0.482237	0.719491	2	0.0673425	-0.482237	1.51594	-0.482237	-0.482237	-0.482237	2	-0.482237	2	-0.482237	-0.482237	-0.482237	-0.482237	-0.150155	-0.482237	-0.482237	-0.482237	0.471865	0.473241	-0.482237	0.251139	2	-0.482237	-0.482237	-0.482237
NDUFV2--NM-021074--chr18--+	0.904723	-0.831963	1.63681	0.671407	0.407401	-0.831963	-0.831963	-0.831963	0.934783	0.422251	-0.831963	0.611318	2	-0.831963	1.57548	-0.831963	-0.831963	-0.831963	-0.831963	0.105243	0.548102	-0.0944275	0.688085	-0.831963	-0.423536	0.0687297	1.26744	0.669439	-0.831963	-0.831963	2	0.426831	1.59706	0.518736	0.342447	-0.831963	0.79008	0.625343	1.79336	0.0508256	0.829773	0.40788	1.18809	0.722303	0.146474	-0.831963	-0.831963	-0.831963	-0.831963
NEAT1--NR-131012--chr11--+	-0.737292	0.108166	-0.737292	1.65253	1.31203	-0.737292	0.0552278	-0.737292	-0.0631797	-0.737292	1.20974	-0.737292	1.80618	-0.737292	-0.737292	-0.737292	-0.737292	-0.737292	-0.737292	0.663037	1.05644	0.780504	-0.301768	-0.737292	0.802752	0.0582419	-0.192071	-0.737292	0.724072	-0.737292	-0.737292	0.374533	-0.737292	-0.737292	0.300002	0.678832	0.327519	1.90175	-0.737292	0.0424282	1.75219	-0.737292	0.359202	-0.737292	-0.255907	1.63818	2	-0.737292	1.29462
NEDD8--NM-006156--chr14---	0.0224909	-0.724115	-0.724115	-0.724115	-0.0159426	-0.724115	-0.724115	0.877762	-0.724115	-0.724115	-0.724115	-0.724115	-0.724115	-0.724115	0.404364	-0.724115	-0.724115	-0.724115	-0.724115	-0.724115	0.384789	0.992926	0.504485	1.39927	0.0261699	0.17585	0.370094	1.2556	-0.724115	-0.724115	-0.724115	0.533662	0.417497	-0.724115	0.449347	0.22447	-0.353217	0.859834	-0.724115	-0.724115	-0.016939	0.514727	-0.0146136	-0.724115	0.613089	-0.724115	-0.724115	-0.724115	-0.724115
NFKBIA--NM-020529--chr14---	-0.526432	-0.526432	-0.526432	-0.526432	-0.526432	-0.526432	-0.526432	-0.526432	-0.526432	-0.526432	-0.526432	-0.526432	-0.526432	-0.526432	-0.526432	-0.526432	-0.526432	-0.526432	-0.526432	-0.526432	-0.0410397	0.291894	-0.526432	-0.526432	0.306712	-0.526432	-0.526432	-0.526432	-0.526432	-0.526432	-0.526432	-0.526432	-0.526432	-0.526432	-0.526432	0.526912	-0.526432	0.214903	-0.526432	-0.526432	-0.526432	-0.526432	0.261425	-0.526432	-0.526432	-0.526432	-0.526432	-0.526432	-0.526432
NKG7--NM-005601--chr19---	-0.291961	-0.291961	-0.291961	-0.291961	-0.291961	-0.291961	-0.291961	-0.291961	-0.291961	-0.291961	-0.291961	-0.291961	-0.291961	-0.291961	-0.291961	-0.291961	-0.291961	-0.291961	-0.291961	-0.291961	-0.291961	-0.291961	-0.291961	-0.291961	-0.291961	-0.291961	-0.291961	-0.291961	-0.291961	-0.291961	-0.291961	-0.291961	-0.291961	-0.291961	-0.291961	-0.291961	-0.291961	-0.291961	-0.291961	-0.291961	-0.291961	-0.291961	-0.291961	-0.291961	-0.291961	-0.291961	-0.291961	-0.291961	-0.291961
NME2--NM-002512--chr17--+	0.506632	-0.86186	1.08351	-0.166936	-0.86186	-0.86186	-0.86186	-0.113858	-0.260449	-0.86186	-0.86186	0.946641	1.4073	0.707201	0.606204	-0.86186	0.847386	-0.86186	1.69956	-0.12335	0.225618	-0.280689	-0.473306	1.63321	0.166215	0.727627	0.308282	-0.167975	-0.86186	-0.86186	-0.86186	0.748858	1.39489	-0.86186	0.656228	-0.86186	-0.569359	1.15779	2	-0.86186	0.113522	-0.86186	0.11638	-0.86186	-0.0908606	-0.86186	-0.86186	-0.86186	0.950914
NNMT--NM-006169--chr11--+	1.50189	1.38025	2	0.532769	0.287856	-1.18618	0.896993	1.11697	0.831746	0.757091	0.69765	0.271887	1.39288	1.1536	0.343275	-1.18618	1.30444	-1.18618	0.878913	1.23068	0.596037	0.330329	1.10092	2	1.15498	0.557968	0.905716	0.872639	0.44882	0.986427	0.658735	0.112428	2	-0.328081	0.0377472	0.149687	1.72489	0.491018	1.67437	-0.625346	0.604454	0.976378	0.865792	0.365537	0.659662	2	1.31983	-1.18618	-1.18618
NOP10--NM-018648--chr15---	0.361194	-0.578588	-0.578588	-0.578588	-0.578588	-0.578588	-0.578588	-0.578588	-0.578588	-0.578588	-0.578588	2	-0.578588	-0.578588	0.841873	-0.578588	-0.578588	-0.578588	-0.578588	-0.578588	0.817233	-0.578588	0.0415877	2	0.365825	-0.578588	0.197794	-0.578588	-0.578588	-0.578588	-0.578588	0.328525	1.78799	-0.578588	0.898494	-0.578588	0.631474	1.41519	-0.578588	-0.578588	-0.578588	0.313203	-0.578588	1.37625	0.106893	2	0.349522	-0.578588	2
NPC2--NM-006432--chr14---	0.888928	-0.534677	-0.534677	-0.534677	-0.534677	-0.534677	-0.534677	-0.534677	-0.534677	-0.534677	-0.534677	-0.534677	-0.534677	-0.534677	0.703048	-0.534677	-0.534677	-0.534677	-0.534677	-0.534677	-0.0552425	-0.534677	-0.534677	1.79427	-0.534677	-0.534677	-0.534677	-0.534677	0.54406	-0.534677	-0.534677	-0.534677	-0.534677	-0.534677	-0.534677	-0.534677	-0.127873	0.197559	-0.534677	-0.534677	-0.534677	-0.534677	-0.534677	-0.534677	-0.534677	-0.534677	-0.534677	-0.534677	-0.534677
NPM1--NM-001037738--chr5--+	-0.919079	-0.919079	1.01988	-0.226447	-0.919079	-0.919079	-0.214363	-0.919079	0.120508	0.0659699	0.407737	-0.919079	-0.919079	-0.919079	0.544143	-0.919079	-0.919079	-0.919079	-0.919079	-0.919079	-0.0474512	-0.919079	-0.217663	-0.919079	0.105605	-0.211682	0.247204	-0.919079	-0.146003	-0.919079	1.3617	-0.919079	-0.919079	-0.919079	-0.919079	-0.173466	-0.627543	0.676465	-0.919079	-0.225744	-0.919079	-0.362195	-0.361392	-0.919079	-0.919079	-0.919079	-0.339516	-0.919079	-0.919079
NUCKS1--NM-022731--chr1---	-0.110224	-0.80038	-0.80038	1.03183	-0.145751	-0.80038	-0.80038	0.0763928	0.422207	-0.80038	-0.80038	1.31946	-0.80038	-0.80038	-0.80038	-0.80038	-0.80038	-0.80038	-0.80038	0.065266	0.695755	0.385634	0.839597	-0.80038	0.617837	0.0315405	0.211098	1.02965	0.108782	-0.80038	-0.80038	1.08763	0.254916	-0.80038	-0.80038	0.0764841	1.29555	1.49319	1.62449	0.0150035	0.342917	-0.145467	-0.80038	-0.80038	0.103349	-0.80038	0.386196	-0.80038	1.32447
NUDC--NM-006600--chr1--+	-0.526209	-0.526209	-0.526209	-0.526209	0.424799	-0.526209	0.67778	0.747518	-0.526209	-0.526209	0.826683	-0.526209	-0.526209	-0.526209	0.989231	-0.526209	-0.526209	-0.526209	-0.526209	-0.526209	0.0607993	0.463431	-0.526209	-0.526209	0.481352	0.682359	-0.526209	-0.526209	0.79457	2	-0.526209	0.441558	-0.526209	-0.526209	2	-0.526209	-0.0281283	0.101616	-0.526209	-0.526209	0.423461	0.425212	-0.526209	-0.526209	0.205107	-0.526209	-0.526209	-0.526209	-0.526209
NUPR1--NM-012385--chr16---	0.724112	1.05253	-0.62651	2	-0.62651	-0.62651	-0.62651	1.5596	0.749744	-0.62651	0.421808	2	2	-0.62651	0.547761	-0.62651	1.62881	-0.62651	-0.62651	1.02193	0.205388	0.140334	1.2196	-0.62651	0.15422	0.309975	1.2599	0.934555	0.396924	-0.62651	2	1.12804	1.89904	-0.62651	1.95307	0.360567	-0.240562	0.595972	-0.62651	-0.62651	0.660488	-0.62651	0.111782	-0.62651	0.390809	2	-0.62651	-0.62651	-0.62651
OAZ1--NM-004152--chr19--+	-0.382431	-0.220721	-0.957799	0.569671	-0.957799	2	-0.957799	0.27668	-0.957799	-0.957799	-0.181422	-0.957799	1.25962	-0.957799	1.94988	2	0.712475	-0.957799	-0.957799	0.645009	0.104883	-0.957799	-0.578105	0.678578	-0.379595	-0.957799	-0.957799	-0.957799	-0.199851	-0.957799	1.27835	-0.957799	0.491107	-0.957799	0.525675	-0.957799	-0.216956	1.24099	1.06376	-0.278031	-0.957799	-0.957799	-0.0018646	0.922976	0.700212	1.11316	-0.957799	-0.957799	-0.957799
OCIAD2--NM-001014446--chr4---	-0.479854	-0.479854	-0.479854	-0.479854	0.459349	-0.479854	-0.479854	-0.479854	-0.479854	-0.479854	-0.479854	-0.479854	-0.479854	-0.479854	1.01677	-0.479854	-0.479854	-0.479854	-0.479854	0.762098	0.0998675	-0.479854	0.173577	2	1.24906	-0.479854	1.48797	0.687053	0.82453	2	-0.479854	-0.479854	2	-0.479854	-0.479854	-0.479854	0.795093	1.27094	-0.479854	-0.479854	-0.479854	-0.479854	-0.479854	-0.479854	-0.479854	-0.479854	-0.479854	-0.479854	-0.479854
ORM1--NM-000607--chr9--+	2	0.981639	1.15324	0.635565	0.658071	0.866826	1.11298	0.46674	1.1386	0.556189	0.43098	0.586624	2	2	0.166387	0.182067	1.39401	-1.35379	2	1.88985	1.9418	1.41522	0.93195	2	1.77621	0.582618	1.04661	1.1368	0.295944	1.50655	1.8707	0.497094	1.96035	-0.712143	0.877729	0.785654	1.6163	0.823048	1.69682	0.48027	0.478272	1.25755	1.25913	0.676269	0.346233	1.85118	1.61153	0.266858	1.59611
ORM2--NM-000608--chr9--+	2	0.906385	2	-0.0546283	0.979213	-1.07566	1.37647	0.672266	0.753174	1.33343	0.60395	0.858873	2	1.88491	0.990679	-1.07566	1.61056	-1.07566	2	1.95544	2	1.36388	-0.161751	2	1.85478	1.02246	0.95401	0.592386	0.037852	1.32767	2	0.602568	2	-0.380429	0.20135	0.389381	1.68346	0.848015	0.862158	0.815873	0.758555	1.36615	1.4571	0.751195	-0.386819	1.78981	1.2622	0.122213	2
OST4--NM-001134693--chr2---	-0.778762	-0.778762	1.58205	2	-0.778762	1.86525	0.0792766	0.754297	-0.0489198	-0.778762	0.836724	1.41595	-0.778762	-0.778762	1.5234	-0.778762	-0.778762	-0.778762	-0.778762	-0.778762	-0.0136501	-0.073482	0.0752584	-0.778762	0.468859	-0.778762	0.268439	-0.778762	-0.778762	-0.778762	-0.778762	-0.0890702	1.02059	0.512866	-0.778762	0.129071	-0.121696	1.16392	2	-0.778762	-0.778762	-0.778762	-0.778762	-0.778762	0.500994	-0.778762	-0.778762	-0.778762	-0.778762
OSTC--NM-021227--chr4--+	-0.444187	-0.444187	-0.444187	-0.444187	0.472231	-0.444187	-0.444187	-0.444187	0.54267	-0.444187	-0.444187	-0.444187	-0.444187	-0.444187	1.96476	-0.444187	-0.444187	-0.444187	-0.444187	-0.444187	-0.444187	1.21612	0.193392	-0.444187	0.0839151	-0.444187	0.353981	-0.444187	-0.444187	-0.444187	-0.444187	-0.444187	1.03313	-0.444187	-0.444187	-0.444187	0.0357775	0.656366	-0.444187	-0.444187	-0.444187	-0.444187	1.16101	-0.444187	0.260529	-0.444187	-0.444187	-0.444187	-0.444187
P4HB--NM-000918--chr17---	0.323867	-0.601412	-0.601412	1.85499	-0.601412	-0.601412	-0.601412	2	-0.601412	-0.601412	0.647119	1.18582	-0.601412	-0.601412	-0.601412	-0.601412	-0.601412	-0.601412	-0.601412	2	-0.601412	0.988655	2	2	2	-0.601412	0.162989	-0.601412	-0.601412	-0.601412	-0.601412	1.9298	-0.601412	-0.601412	-0.601412	-0.601412	0.891455	0.854546	-0.601412	1.85697	1.89382	0.933902	0.935875	1.32326	1.0558	-0.601412	1.97399	-0.601412	-0.601412
PABPC1--NM-002568--chr8---	1.37757	-0.728501	-0.728501	-0.728501	0.514761	-0.728501	0.171602	-0.728501	0.0371207	-0.728501	-0.728501	2	-0.728501	-0.728501	0.404443	-0.728501	-0.728501	-0.728501	-0.728501	0.211653	-0.728501	-0.728501	0.504959	-0.728501	-0.728501	0.175025	0.761141	-0.728501	1.44164	-0.728501	-0.728501	-0.728501	1.15906	-0.728501	1.20409	0.879859	0.236631	0.861714	-0.728501	-0.728501	0.513202	-0.728501	-0.728501	-0.728501	0.253014	-0.728501	0.011749	-0.728501	-0.728501
PARK7--NM-001123377--chr1--+	0.562276	-0.720634	-0.720634	-0.720634	0.503377	-0.720634	0.165531	0.862678	0.586623	-0.720634	-0.720634	-0.720634	-0.720634	-0.720634	-0.720634	-0.720634	1.42162	-0.720634	2	1.33509	0.879116	-0.720634	0.161381	1.37814	0.0209553	-0.720634	-0.720634	0.149033	-0.720634	-0.720634	-0.720634	-0.00833425	2	-0.720634	-0.720634	0.216957	0.685712	0.584189	1.87217	-0.720634	-0.720634	-0.0203652	0.505423	-0.720634	0.245683	2	-0.720634	-0.720634	1.55137
PARK7--NM-007262--chr1--+	0.485099	-0.51622	-0.51622	-0.51622	-0.51622	-0.51622	0.686205	-0.51622	-0.51622	-0.51622	-0.51622	-0.51622	-0.51622	-0.51622	0.997252	-0.51622	-0.51622	-0.51622	-0.51622	0.739709	-0.51622	0.472135	1.13153	-0.51622	-0.51622	-0.51622	0.310999	-0.51622	-0.51622	-0.51622	2	-0.51622	2	-0.51622	-0.51622	-0.51622	-0.018786	1.05939	-0.51622	-0.51622	0.432217	-0.51622	0.435336	1.56662	0.794962	2	-0.51622	-0.51622	-0.51622
PCBD1--NM-000281--chr10---	0.796965	0.421399	2	2	0.731433	-0.630423	-0.630423	1.1312	1.71364	-0.630423	0.477479	-0.630423	-0.630423	1.5576	0.610591	2	-0.630423	-0.630423	-0.630423	2	0.589064	0.780545	0.720696	-0.630423	-0.181629	2	-0.630423	-0.630423	-0.630423	1.93438	2	1.22385	2	-0.630423	1.48652	-0.630423	1.35101	1.70994	-0.630423	-0.630423	1.19555	0.148708	0.149832	-0.630423	1.47348	-0.630423	-0.630423	-0.630423	-0.630423
PCK1--NM-002591--chr20--+	1.71386	1.56625	1.51647	1.0623	1.37738	-0.794858	0.6341	0.0938535	0.859209	0.379365	2	0.556374	2	1.06937	0.262503	-0.794858	-0.794858	-0.794858	-0.794858	2	1.57229	0.407306	0.86745	1.19471	1.46863	2	1.40597	-0.794858	0.754155	-0.794858	-0.794858	1.87652	-0.794858	-0.794858	1.0088	0.706203	1.57501	0.90913	-0.794858	0.613882	0.364007	2	-0.794858	-0.794858	1.77119	-0.794858	1.15226	-0.794858	1.35892
PDCD5--NM-004708--chr19--+	1.26861	-0.493178	-0.493178	0.702898	-0.493178	-0.493178	-0.493178	0.794255	0.541948	-0.493178	-0.493178	1.46429	2	-0.493178	1.03857	-0.493178	2	-0.493178	-0.493178	-0.493178	1.012	-0.493178	1.5684	-0.493178	-0.493178	0.728395	0.992053	-0.493178	-0.493178	-0.493178	2	-0.493178	-0.493178	-0.493178	-0.493178	-0.493178	1.14188	0.413001	-0.493178	-0.493178	1.18561	-0.493178	0.469868	-0.493178	-0.493178	2	1.24916	-0.493178	-0.493178
PEBP1--NM-002567--chr12--+	1.57239	0.0693271	0.319763	0.488171	0.983848	1.3564	0.511265	0.0594708	0.822656	0.0134079	0.672633	1.46827	0.611815	-0.0196638	0.58395	0.86298	0.853834	-1.43493	1.74946	1.12223	0.253205	0.452938	1.04946	1.31017	1.62291	0.72099	0.793166	0.689348	-0.73532	0.995707	2	0.882465	1.8559	-0.474915	1.12016	0.588083	0.530039	0.978407	1.24092	-0.023894	0.981852	0.214684	0.986509	-0.330229	1.1086	-1.43493	0.453618	0.219162	-1.43493
PFDN2--NM-012394--chr1---	-0.600721	-0.600721	-0.600721	-0.600721	0.224622	-0.600721	-0.600721	0.504697	-0.600721	-0.600721	-0.600721	-0.600721	-0.600721	-0.600721	0.71447	-0.600721	-0.600721	-0.600721	2	-0.600721	-0.600721	-0.600721	-0.600721	1.87399	-0.600721	-0.600721	0.118124	-0.600721	-0.600721	-0.600721	-0.600721	-0.600721	2	-0.600721	-0.600721	-0.600721	-0.600721	0.177344	-0.600721	-0.600721	-0.600721	-0.600721	0.226171	-0.600721	0.0339594	-0.600721	0.258607	-0.600721	2
PFDN5--NM-002624--chr12--+	0.187845	-1.24117	1.19588	0.375528	-0.758761	-1.24117	-0.202283	0.18995	0.210826	0.534667	-0.554899	0.320992	-1.24117	0.114166	-0.472445	-1.24117	-1.24117	1.65436	0.971356	-1.24117	-0.138633	-0.367169	0.616594	1.38769	0.302648	-0.198829	-0.49579	-0.219232	-0.571189	-1.24117	-1.24117	-0.0925675	-0.463498	-1.24117	0.0701362	-0.59499	-0.420596	0.877391	1.8236	-1.24117	-0.398649	-1.24117	-0.107067	-1.24117	0.840436	0.589446	-0.738897	0.34288	-1.24117
PFN1--NM-005022--chr17---	1.36005	-0.593868	-0.593868	1.09755	0.203529	-0.593868	-0.593868	1.20983	-0.593868	0.817228	-0.593868	1.98829	-0.593868	-0.593868	-0.593868	-0.593868	1.84658	-0.593868	-0.593868	-0.593868	-0.101676	-0.593868	0.41092	-0.593868	-0.134354	-0.593868	0.100637	-0.593868	-0.593868	-0.593868	2	0.217581	2	-0.593868	-0.593868	-0.593868	-0.593868	0.363749	-0.593868	-0.593868	-0.593868	-0.593868	-0.593868	-0.593868	0.506956	-0.593868	0.236364	-0.593868	1.99439
PHYH--NM-006214--chr10---	1.16755	-0.536949	2	-0.536949	-0.536949	2	-0.536949	-0.536949	1.78131	1.10878	-0.536949	-0.536949	-0.536949	-0.536949	-0.536949	2	-0.536949	-0.536949	-0.536949	0.692818	1.27392	-0.536949	0.634915	2	1.99973	0.644907	0.273039	-0.536949	-0.536949	-0.536949	-0.536949	2	1.93207	-0.536949	1.00407	0.708755	1.04495	1.37527	2	0.621414	0.391731	1.08993	1.09202	-0.536949	0.178203	-0.536949	0.431334	-0.536949	-0.536949
PLA2G2A--NM-001161727--chr1---	2	0.433864	1.93494	1.4532	0.187116	-0.516712	0.999004	1.07534	-0.516712	-0.516712	0.484546	0.916559	2	1.4607	0.604845	-0.516712	-0.516712	-0.516712	-0.516712	1.55036	1.67791	1.5478	0.370172	1.59365	2	-0.516712	1.28501	0.357755	-0.516712	-0.516712	-0.516712	2	2	-0.516712	-0.516712	-0.516712	2	0.650892	-0.516712	0.977557	-0.516712	1.48713	-0.516712	-0.516712	-0.516712	2	0.216098	2	-0.516712
PLA2G2A--NM-001161728--chr1---	2	2	1.82518	2	-0.560138	-0.560138	0.306808	-0.560138	-0.560138	-0.560138	1.56975	-0.560138	2	2	-0.560138	-0.560138	1.53565	2	-0.560138	-0.560138	0.773272	1.1002	0.302748	-0.560138	2	-0.560138	2	-0.560138	0.390905	1.69506	2	1.96768	1.78677	-0.560138	0.574569	0.988976	1.8856	0.262239	-0.560138	1.35801	0.123683	1.68234	0.125932	0.941584	1.52027	2	1.10091	1.68842	-0.560138
PLG--NM-000301--chr6--+	1.34213	1.43498	0.618908	0.553892	0.699935	0.824674	0.806111	1.26306	0.95989	1.5061	1.17084	0.919602	0.904402	1.46251	-0.311691	-1.09639	1.62747	-1.09639	1.16209	1.40335	1.17552	1.19965	1.25579	-1.09639	0.938455	1.18727	1.29354	0.552077	0.406691	0.52534	0.921297	0.886114	2	0.821301	0.93265	1.4226	1.10344	0.383428	1.51938	0.784853	0.861932	1.14579	1.58793	-0.0164902	1.12748	0.772251	2	-1.09639	1.25161
PLGLB1--NM-001032392-1--chr2--+	0.922087	-0.614124	2	2	0.224044	-0.614124	1.19089	1.2818	0.951241	-0.614124	-0.614124	2	-0.614124	-0.614124	0.721504	-0.614124	-0.614124	-0.614124	-0.614124	0.494224	-0.0967662	1.4181	0.442038	-0.614124	0.928802	1.1969	0.115891	-0.614124	-0.614124	-0.614124	2	0.238814	2	-0.614124	-0.614124	1.28197	1.06989	1.26058	2	1.16535	0.222865	1.35401	1.35633	1.22396	1.33239	2	1.41898	-0.614124	2
PLIN2--NM-001122--chr9---	2	0.172701	-0.667179	1.07333	-0.0453126	-0.667179	1.73538	0.165714	-0.667179	2	0.217481	1.34657	-0.667179	1.07996	-0.667179	-0.667179	-0.667179	-0.667179	-0.667179	1.51184	1.90481	-0.020051	-0.234529	-0.667179	2	0.123106	1.39541	-0.667179	0.784543	-0.667179	-0.667179	0.437311	1.46409	-0.667179	1.0232	1.83022	-0.341483	1.58168	-0.667179	1.41843	0.418899	1.10332	-0.667179	-0.667179	0.507058	1.69263	0.460013	-0.667179	-0.667179
PNN--NM-002687--chr14--+	-0.592591	-0.592591	-0.592591	0.402252	-0.592591	-0.592591	-0.592591	-0.592591	-0.592591	0.822258	-0.592591	-0.592591	-0.592591	1.65366	0.681448	-0.592591	-0.592591	-0.592591	-0.592591	-0.592591	-0.0990895	0.855925	-0.592591	-0.592591	-0.131854	-0.592591	0.642758	-0.592591	0.517796	-0.592591	2	0.221016	0.696275	-0.592591	-0.592591	-0.592591	-0.173851	1.33178	-0.592591	0.403262	0.803753	-0.592591	-0.592591	-0.592591	-0.592591	-0.592591	0.239849	-0.592591	-0.592591
POLR2J--NM-006234--chr7---	-0.521788	-0.521788	-0.521788	2	-0.521788	-0.521788	-0.521788	1.40684	-0.521788	-0.521788	-0.521788	2	-0.521788	-0.521788	-0.521788	-0.521788	2	-0.521788	2	-0.521788	0.813311	-0.521788	0.0714083	-0.521788	-0.521788	-0.521788	-0.521788	-0.521788	-0.521788	-0.521788	2	0.992551	0.85269	-0.521788	-0.521788	-0.521788	-0.0752341	0.281997	-0.521788	0.540214	-0.521788	-0.521788	-0.521788	1.34801	-0.521788	-0.521788	-0.521788	-0.521788	-0.521788
POLR2L--NM-021128--chr11---	0.53658	-0.741488	1.68751	-0.741488	0.477903	-0.741488	1.62533	0.192468	-0.741488	0.492514	0.920657	-0.741488	-0.741488	1.21764	1.09154	-0.741488	1.39268	-0.741488	-0.741488	1.30647	0.852224	1.30394	-0.25634	-0.741488	0.542167	0.14469	-0.134144	-0.741488	-0.741488	-0.741488	-0.741488	0.918811	1.10983	0.587444	2	0.192565	0.659551	0.818195	-0.741488	0.127074	-0.0451458	-0.043862	-0.0428561	2	0.877936	-0.741488	-0.741488	-0.741488	2
POMP--NM-015932--chr13--+	0.0347241	0.245932	1.76614	2	-0.716759	2	-0.716759	-0.716759	-0.716759	-0.716759	-0.716759	-0.716759	-0.716759	-0.716759	0.419092	-0.716759	1.46477	-0.716759	-0.716759	-0.716759	0.912322	0.024995	0.811984	1.4205	0.0384272	-0.716759	1.10793	-0.716759	-0.716759	-0.716759	2	0.00860064	2	-0.716759	-0.716759	-0.716759	0.715373	1.11372	-0.716759	0.796554	0.954483	-0.716759	-0.00262273	1.7397	-0.716759	-0.716759	0.575256	-0.716759	-0.716759
PON3--NM-000940--chr7---	1.16405	1.574	-0.52187	-0.52187	0.397979	-0.52187	0.642671	-0.52187	-0.52187	1.10592	0.786696	1.3513	-0.52187	-0.52187	-0.52187	-0.52187	-0.52187	-0.52187	-0.52187	-0.52187	0.51655	-0.52187	1.78254	-0.52187	0.835386	-0.52187	0.279286	-0.52187	0.755635	2	-0.52187	-0.52187	2	-0.52187	-0.52187	0.710253	1.81844	0.582803	2	0.623863	-0.52187	0.398378	1.08934	-0.52187	-0.52187	2	1.14544	-0.52187	2
PPA1--NM-021129--chr10---	0.532435	-0.472278	-0.472278	-0.472278	0.480715	-0.472278	-0.472278	0.804107	-0.472278	1.21416	-0.472278	-0.472278	-0.472278	-0.472278	-0.472278	-0.472278	-0.472278	-0.472278	-0.472278	-0.472278	0.115955	-0.472278	0.728573	-0.472278	0.0769009	-0.472278	0.357745	-0.472278	-0.472278	-0.472278	-0.472278	0.497508	1.064	-0.472278	-0.472278	-0.472278	-0.472278	1.10867	-0.472278	-0.472278	-0.472278	-0.472278	-0.472278	-0.472278	-0.472278	-0.472278	0.519956	-0.472278	-0.472278
PPDPF--NM-024299--chr20--+	0.199063	-1.02154	0.713603	2	0.147727	-1.02154	0.051197	0.45621	-1.02154	-1.02154	0.165806	2	-1.02154	-1.02154	-1.02154	-1.02154	-1.02154	-1.02154	1.26308	0.72391	0.268335	1.16403	-0.157342	-1.02154	0.0576307	-1.02154	-0.251872	-0.402643	-0.329729	-1.02154	1.85128	1.27004	1.24496	-0.0722234	-1.02154	0.105325	0.118487	1.36491	0.823631	-1.02154	0.959441	-0.150137	-0.522477	-1.02154	-0.333862	1.67713	-0.502901	-1.02154	-1.02154
PPIA--NM-021130--chr7--+	-1.00149	0.194622	-1.00149	0.112035	-0.0835112	-1.00149	-0.336888	0.555846	-0.436184	-1.00149	-0.254693	-1.00149	-1.00149	-1.00149	-0.164967	-1.00149	-1.00149	-1.00149	-1.00149	-1.00149	0.357853	-1.00149	-0.340001	-1.00149	0.430406	-1.00149	0.0984068	-0.349261	-1.00149	-1.00149	1.14946	-0.467283	0.392215	-1.00149	-1.00149	0.186064	-0.108546	0.426869	-1.00149	-0.347622	-1.00149	-1.00149	-0.475549	-1.00149	-0.597805	-1.00149	0.271877	-1.00149	-1.00149
PPIB--NM-000942--chr15---	-0.242811	-0.868813	-0.868813	-0.868813	0.16951	1.44761	-0.868813	0.474303	0.240127	-0.868813	-0.868813	-0.868813	-0.868813	-0.868813	1.14812	-0.868813	-0.868813	-0.868813	-0.868813	0.459443	0.832602	-0.868813	-0.868813	1.78393	0.750797	-0.868813	1.2889	-0.868813	-0.868813	1.08667	-0.868813	-0.264572	0.7076	-0.868813	-0.868813	-0.868813	0.781749	0.994294	1.33065	-0.868813	-0.275871	-0.274778	-0.868813	1.17747	-0.0490907	-0.868813	0.571487	-0.868813	-0.868813
PPP1R15A--NM-014330--chr19--+	-0.663087	-0.663087	-0.663087	-0.663087	-0.663087	-0.663087	-0.663087	-0.663087	-0.663087	-0.663087	-0.0227966	-0.663087	-0.663087	-0.663087	2	-0.663087	-0.663087	-0.663087	-0.663087	-0.663087	-0.663087	-0.663087	-0.663087	-0.663087	-0.663087	-0.663087	-0.663087	-0.663087	-0.663087	-0.663087	-0.663087	-0.663087	-0.663087	-0.663087	-0.663087	-0.663087	-0.226734	0.262376	-0.663087	-0.663087	-0.663087	-0.663087	-0.663087	0.888018	-0.663087	-0.663087	-0.663087	-0.663087	-0.663087
PRAP1--NM-145202--chr10--+	2	-0.609933	1.59221	0.731068	1.69623	-0.609933	-0.609933	0.82009	0.570762	1.71729	0.896978	-0.609933	-0.609933	-0.609933	0.39748	-0.609933	-0.609933	-0.609933	-0.609933	1.24676	1.77291	1.51933	0.97385	2	1.26973	0.193482	2	1.80107	-0.609933	1.47208	2	0.512907	2	-0.609933	-0.609933	1.92895	1.53468	1.37373	2	0.73226	2	0.874559	1.19195	-0.609933	0.858247	-0.609933	0.535986	-0.609933	1.44211
PRDX1--NM-181697--chr1---	0.279804	-0.0318727	-0.904763	-0.904763	0.612325	-0.904763	-0.0865283	1.01257	-0.208778	-0.904763	1.10545	0.411373	-0.904763	-0.904763	0.125135	2	-0.904763	-0.904763	-0.904763	-0.904763	-0.50583	0.266177	0.216509	-0.904763	0.284982	0.491708	0.44939	0.902007	-0.00715717	-0.904763	-0.904763	0.243138	2	-0.904763	0.166188	-0.904763	0.574387	1.43248	-0.904763	-0.0997433	0.224002	-0.904763	-0.257242	-0.904763	0.315626	-0.904763	-0.904763	-0.904763	1.19308
PRDX2--NM-005809--chr19---	0.197472	-0.649978	-0.649978	-0.649978	0.153847	-0.649978	-0.649978	1.16826	0.851248	-0.649978	-0.649978	-0.649978	-0.649978	-0.649978	-0.649978	-0.649978	1.81014	-0.649978	-0.649978	0.412957	1.65331	0.806341	-0.0907336	1.76021	0.829728	1.63777	0.592026	0.348729	-0.649978	-0.649978	2	-0.649978	1.48409	-0.649978	0.681983	0.426732	0.96504	1.76561	-0.649978	0.351239	1.23468	0.154196	-0.649978	1.1128	-0.649978	-0.649978	0.186946	-0.649978	1.95914
PRDX4--NM-006406--chrX--+	1.8799	0.51336	-0.631813	-0.631813	1.3585	2	0.441656	0.503834	-0.631813	1.80607	0.574417	1.09487	-0.631813	-0.631813	2	-0.631813	-0.631813	-0.631813	2	1.26493	0.695906	-0.631813	-0.631813	1.91057	1.20514	0.445738	1.14474	0.421671	-0.631813	-0.631813	2	0.231042	1.6193	-0.631813	0.773202	-0.631813	1.07179	0.588048	-0.631813	-0.631813	0.214907	0.216468	0.853389	1.22765	0.538749	-0.631813	0.251014	-0.631813	-0.631813
PRDX5--NM-012094--chr11--+	0.9727	-0.731416	2	-0.731416	-0.0359635	1.98166	-0.731416	-0.731416	0.017491	-0.731416	-0.731416	-0.731416	-0.731416	-0.731416	-0.731416	-0.731416	-0.731416	-0.731416	-0.731416	1.31105	0.858021	-0.0077127	0.760124	-0.731416	0.294738	-0.731416	-0.731416	0.741828	0.234443	-0.731416	-0.731416	-0.731416	-0.731416	0.593951	0.420969	-0.731416	-0.0571865	1.05452	-0.731416	-0.731416	-0.731416	-0.0356615	-0.0346583	0.793701	-0.731416	-0.731416	-0.731416	-0.731416	-0.731416
PRDX6--NM-004905--chr1--+	1.17847	1.19504	-0.872536	-0.0109977	1.09808	-0.872536	0.00403398	-0.872536	0.420567	0.352729	-0.872536	1.36957	2	-0.872536	0.230787	-0.872536	1.24652	-0.872536	-0.872536	0.0430384	0.211649	0.806229	-7.09639e-05	-0.872536	1.18608	0.623495	0.197281	-0.872536	0.0890638	-0.872536	1.96444	-0.872536	0.243627	-0.872536	1.00953	0.693774	0.518583	1.20816	-0.872536	-0.872536	0.336703	-0.179849	1.39717	1.51358	-0.340098	1.75487	-0.151639	-0.872536	1.37487
PRRC2C--NM-015172--chr1--+	-0.550574	-0.550574	-0.550574	-0.550574	-0.550574	-0.550574	1.91452	0.612977	-0.550574	-0.550574	-0.550574	-0.550574	-0.550574	-0.550574	-0.550574	-0.550574	-0.550574	-0.550574	-0.550574	-0.550574	-0.550574	-0.550574	0.0538384	-0.550574	-0.0499433	-0.550574	0.206074	-0.550574	-0.550574	-0.550574	2	0.333482	0.849893	-0.550574	-0.550574	1.4147	-0.550574	0.890619	-0.550574	-0.550574	-0.550574	0.31855	0.971122	-0.550574	0.117484	-0.550574	-0.550574	-0.550574	-0.550574
PSAP--NM-002778--chr10---	-0.512033	-0.512033	-0.512033	-0.512033	-0.512033	-0.512033	0.620815	0.686433	-0.512033	-0.512033	-0.512033	1.31016	-0.512033	-0.512033	-0.512033	-0.512033	-0.512033	-0.512033	2	-0.512033	-0.512033	-0.512033	0.110516	-0.512033	0.00362035	-0.512033	-0.512033	-0.512033	-0.512033	-0.512033	-0.512033	0.398551	-0.512033	-0.512033	-0.512033	-0.512033	1.2858	0.331525	-0.512033	-0.512033	1.58597	-0.512033	-0.512033	-0.512033	-0.512033	-0.512033	1.65848	2	-0.512033
PSMA2--NM-002787--chr7---	0.322946	-0.602768	-0.602768	0.489806	0.932675	-0.602768	-0.602768	-0.602768	-0.602768	-0.602768	-0.602768	1.18531	-0.602768	-0.602768	0.79643	-0.602768	-0.602768	-0.602768	-0.602768	0.558333	1.91324	0.988047	0.920569	2	-0.09677	0.513096	1.99817	-0.602768	-0.602768	-0.602768	2	0.956746	0.812713	-0.602768	-0.602768	-0.602768	-0.142893	1.03405	-0.602768	-0.602768	-0.602768	0.275674	0.276941	1.32281	0.609414	-0.602768	0.311449	-0.602768	-0.602768
PSMA7--NM-002792--chr20---	0.854304	-0.775744	2	-0.775744	0.387519	-0.775744	-0.775744	-0.775744	1.2265	1.13688	-0.775744	0.578915	-0.775744	-0.775744	-0.775744	-0.775744	-0.775744	-0.775744	-0.775744	0.712339	-0.365135	0.429469	0.0624962	-0.775744	-0.0709602	-0.775744	-0.775744	-0.775744	-0.775744	-0.775744	1.94994	0.405756	2	-0.775744	-0.775744	-0.775744	0.127285	1.31155	-0.775744	0.0528383	0.38606	-0.775744	-0.10927	0.683085	-0.264193	-0.775744	-0.0831268	-0.775744	-0.775744
PSMB1--NM-002793--chr6---	-0.745411	0.198753	1.68971	0.124458	-0.745411	1.98182	0.139635	0.190899	0.560195	-0.745411	-0.745411	-0.745411	-0.745411	-0.745411	0.368581	-0.745411	1.39413	-0.745411	-0.745411	-0.745411	1.06481	0.52114	-0.25904	-0.745411	-0.00475805	0.143001	-0.745411	-0.745411	0.886566	-0.745411	2	-0.0340106	1.65049	-0.745411	0.412986	0.190996	-0.0676637	1.04984	1.84412	-0.745411	-0.0473135	-0.0460264	-0.745411	1.66378	-0.207825	1.9074	0.52174	-0.745411	1.52373
PSMB3--NM-002795--chr17--+	1.72747	-0.596143	-0.596143	-0.596143	0.775538	-0.596143	-0.596143	-0.596143	0.248561	-0.596143	-0.596143	1.00123	-0.596143	-0.596143	-0.596143	-0.596143	1.80456	2	2	-0.596143	0.931261	-0.596143	-0.0504049	1.75584	-0.596143	0.40071	0.0870524	-0.596143	-0.596143	-0.596143	-0.596143	-0.596143	-0.596143	-0.596143	-0.596143	-0.596143	0.164331	0.8661	2	-0.596143	-0.596143	-0.596143	-0.596143	-0.596143	-0.596143	-0.596143	0.220569	-0.596143	-0.596143
PSMB6--NM-002798--chr17--+	-0.55563	-0.55563	-0.55563	-0.55563	-0.55563	-0.55563	-0.55563	0.622286	-0.55563	1.00071	-0.55563	-0.55563	-0.55563	-0.55563	0.845817	-0.55563	-0.55563	-0.55563	-0.55563	0.607338	-0.55563	1.03774	0.970156	-0.55563	-0.55563	-0.55563	0.803258	0.537065	0.665799	-0.55563	-0.55563	0.339341	2	-0.55563	-0.55563	-0.55563	-0.0950153	0.500553	-0.55563	0.539811	-0.55563	1.5095	-0.55563	-0.55563	0.658501	-0.55563	-0.55563	-0.55563	2
PSMB9--NM-002800--chr6--+	0.796849	-0.538199	-0.538199	-0.538199	-0.538199	-0.538199	-0.538199	-0.538199	-0.538199	-0.538199	1.19805	-0.538199	-0.538199	-0.538199	-0.538199	-0.538199	-0.538199	-0.538199	-0.538199	-0.538199	-0.538199	-0.538199	-0.538199	-0.538199	-0.538199	-0.538199	0.0962219	-0.538199	-0.538199	-0.538199	-0.538199	-0.538199	-0.538199	-0.538199	-0.538199	-0.538199	-0.538199	-0.28456	-0.538199	-0.538199	0.189188	-0.538199	-0.538199	-0.538199	-0.538199	-0.538199	-0.538199	-0.538199	-0.538199
PSMD8--NM-002812--chr19--+	-0.600561	-0.600561	-0.600561	0.393083	-0.600561	-0.600561	-0.600561	0.468978	-0.600561	0.812583	-0.600561	1.02561	-0.600561	-0.600561	0.671943	-0.600561	-0.600561	-0.600561	2	0.455405	-0.107655	0.230433	0.405685	1.79383	0.245481	-0.600561	0.094952	0.391598	0.508488	-0.600561	2	-0.600561	2	-0.600561	-0.600561	-0.600561	-0.182326	0.15225	2	-0.600561	-0.600561	-0.600561	-0.600561	1.15066	-0.600561	-0.600561	0.230876	-0.600561	-0.600561
PSME2--NM-002818--chr14---	-0.518832	-0.518832	-0.518832	-0.518832	-0.518832	-0.518832	-0.518832	-0.518832	-0.518832	-0.518832	-0.518832	-0.518832	2	-0.518832	-0.518832	-0.518832	-0.518832	-0.518832	-0.518832	0.548259	-0.518832	-0.518832	0.0425984	-0.518832	0.671864	-0.518832	-0.518832	-0.518832	0.601901	-0.518832	-0.518832	-0.518832	-0.518832	-0.518832	-0.518832	-0.518832	-0.0961912	0.0139017	-0.518832	0.486299	-0.518832	-0.518832	-0.518832	1.25083	-0.518832	-0.518832	-0.518832	-0.518832	-0.518832
PTGDS--NM-000954--chr9--+	0.315327	-0.274046	-0.274046	-0.274046	-0.274046	-0.274046	-0.274046	-0.274046	-0.274046	-0.274046	-0.274046	-0.274046	-0.274046	-0.274046	-0.274046	-0.274046	-0.274046	-0.274046	-0.274046	-0.274046	-0.274046	-0.274046	-0.274046	-0.274046	-0.274046	-0.274046	-0.274046	-0.274046	-0.274046	-0.274046	-0.274046	-0.274046	-0.274046	-0.274046	-0.274046	-0.274046	-0.274046	-0.274046	1.79672	-0.274046	-0.274046	-0.274046	-0.274046	-0.274046	-0.274046	-0.274046	-0.274046	-0.274046	-0.274046
PTMA--NM-001099285--chr2--+	-0.574782	-0.574782	-0.574782	-0.574782	-0.574782	-0.574782	-0.574782	0.431945	0.23465	-0.574782	-0.574782	-0.574782	-0.574782	-0.574782	-0.574782	-0.574782	-0.574782	-0.574782	-0.574782	-0.574782	0.273766	0.207409	-0.574782	-0.574782	-0.574782	-0.574782	0.0798852	-0.574782	0.469135	-0.574782	-0.574782	-0.574782	-0.574782	-0.574782	-0.574782	-0.574782	-0.574782	0.826402	-0.574782	-0.574782	-0.574782	0.177202	-0.574782	-0.574782	-0.574782	-0.574782	-0.574782	-0.574782	-0.574782
PTMA--NM-002823--chr2--+	-1.05978	-0.962437	-1.40613	-0.151956	-1.07761	-1.40613	-0.990219	-0.0868905	-1.05236	-1.40613	-0.623064	-0.3423	-1.40613	-1.40613	-0.882629	-1.40613	-0.400686	-1.40613	0.100597	-0.671241	0.00775168	-0.442492	-0.294914	-0.42109	-0.510041	-0.471133	-0.565151	-0.997962	-0.213206	0.179041	-1.40613	-1.07182	-0.533941	-1.40613	-0.256128	-0.966083	-0.654271	0.532967	-0.189221	-1.40613	-0.635872	-0.831432	-1.07699	0.239035	-0.952601	-1.40613	-0.442104	-1.40613	-1.40613
RAB13--NM-002870--chr1---	-0.522855	-0.522855	-0.522855	1.38546	1.05034	2	0.616113	1.51214	-0.522855	-0.522855	0.756975	-0.522855	-0.522855	-0.522855	-0.522855	-0.522855	-0.522855	-0.522855	-0.522855	2	1.53327	0.41334	-0.522855	-0.522855	-0.0044163	-0.522855	-0.522855	-0.522855	-0.522855	-0.522855	-0.522855	-0.522855	-0.522855	-0.522855	0.967889	-0.522855	0.34934	0.771437	-0.522855	-0.522855	1.04837	-0.522855	-0.522855	1.45006	0.168966	-0.522855	0.413839	-0.522855	-0.522855
RABAC1--NM-006423--chr19---	-0.5375	-0.5375	-0.5375	0.432574	-0.5375	-0.5375	1.14142	-0.5375	-0.5375	-0.5375	-0.5375	-0.5375	-0.5375	-0.5375	2	-0.5375	-0.5375	-0.5375	-0.5375	0.493418	-0.5375	-0.5375	-0.5375	-0.5375	-0.0882343	-0.5375	0.141515	-0.5375	-0.5375	-0.5375	-0.5375	-0.5375	1.53229	-0.5375	-0.5375	0.506778	-0.5375	0.915796	2	-0.5375	-0.5375	0.242451	-0.5375	2	-0.5375	-0.5375	-0.5375	-0.5375	-0.5375
RAN--NM-006325--chr12--+	1.1419	-0.508781	-0.508781	-0.508781	-0.508781	-0.508781	-0.508781	1.52841	-0.508781	-0.508781	-0.508781	-0.508781	-0.508781	-0.508781	-0.508781	-0.508781	-0.508781	-0.508781	-0.508781	-0.508781	-0.508781	-0.508781	0.117807	-0.508781	0.445396	-0.508781	-0.508781	-0.508781	-0.508781	-0.508781	-0.508781	-0.508781	0.943068	-0.508781	-0.508781	-0.508781	-0.508781	0.0857795	-0.508781	-0.508781	-0.508781	0.392231	0.39353	-0.508781	0.183787	-0.508781	1.12368	-0.508781	-0.508781
RARRES2--NM-002889--chr7---	1.5506	0.517355	2	1.16522	0.826278	0.941256	0.924246	0.775329	0.409566	0.841487	0.71991	0.377708	2	1.09021	0.344149	-1.21644	1.22635	-1.21644	1.24509	0.634589	1.40742	0.492034	0.868534	1.19308	1.24146	0.291904	0.748939	0.995604	0.386368	2	2	1.36004	2	-0.0241634	0.758637	0.775452	0.708561	1.06167	1.25737	-0.125714	0.651728	0.333964	0.655327	0.468648	0.684515	1.84217	0.950764	-1.21644	1.7527
RARRES3--NM-004585--chr11--+	-0.54537	-0.54537	-0.54537	-0.54537	-0.54537	-0.54537	-0.54537	0.409712	-0.54537	-0.54537	-0.54537	0.906775	-0.54537	-0.54537	-0.54537	-0.54537	-0.54537	-0.54537	-0.54537	1.0498	0.259647	-0.54537	-0.54537	-0.54537	0.210132	-0.54537	0.0757126	-0.54537	-0.54537	-0.54537	-0.54537	0.180293	0.604181	-0.54537	-0.54537	-0.54537	-0.54537	-0.0746064	-0.54537	-0.54537	-0.54537	-0.54537	-0.54537	-0.54537	-0.54537	-0.54537	1.18436	-0.54537	2
RBM25--NM-021239--chr14--+	0.532328	0.807425	-0.446476	-0.446476	-0.446476	-0.446476	-0.446476	-0.446476	-0.446476	1.19648	-0.446476	-0.446476	-0.446476	-0.446476	-0.446476	-0.446476	-0.446476	-0.446476	-0.446476	-0.446476	-0.446476	-0.446476	-0.446476	-0.446476	0.0885408	-0.446476	-0.446476	-0.446476	0.842929	-0.446476	-0.446476	-0.446476	-0.446476	-0.446476	-0.446476	-0.446476	-0.446476	0.428759	-0.446476	-0.446476	-0.446476	-0.446476	-0.446476	-0.446476	0.267468	-0.446476	-0.446476	-0.446476	-0.446476
RBM3--NM-006743--chrX--+	-0.48662	-0.48662	-0.48662	-0.48662	-0.48662	-0.48662	-0.48662	-0.48662	-0.48662	-0.48662	-0.48662	1.41952	-0.48662	-0.48662	-0.48662	-0.48662	-0.48662	-0.48662	-0.48662	-0.48662	-0.48662	-0.48662	-0.48662	2	-0.48662	-0.48662	-0.48662	0.676357	-0.48662	-0.48662	-0.48662	0.465915	1.02233	-0.48662	-0.48662	-0.48662	0.0036216	0.395801	-0.48662	-0.48662	-0.48662	0.449827	-0.48662	-0.48662	-0.48662	-0.48662	-0.48662	-0.48662	-0.48662
RBM39--NM-001242600--chr20---	-0.461945	-0.461945	-0.461945	-0.461945	-0.461945	-0.461945	-0.461945	1.58834	-0.461945	-0.461945	-0.461945	-0.461945	-0.461945	-0.461945	-0.461945	-0.461945	-0.461945	-0.461945	-0.461945	-0.461945	-0.461945	-0.461945	-0.461945	-0.461945	-0.461945	-0.461945	-0.461945	-0.461945	-0.461945	-0.461945	-0.461945	-0.461945	-0.461945	-0.461945	-0.461945	-0.461945	-0.461945	1.04173	-0.461945	-0.461945	-0.461945	-0.461945	-0.461945	-0.461945	-0.461945	-0.461945	1.18101	-0.461945	-0.461945
RBM8A--NM-005105--chr1---	1.00363	-0.517688	-0.517688	-0.517688	-0.517688	-0.517688	-0.517688	-0.517688	-0.517688	-0.517688	-0.517688	-0.517688	-0.517688	-0.517688	0.804994	-0.517688	-0.517688	2	-0.517688	-0.517688	-0.00534505	-0.517688	0.0597972	-0.517688	-0.0393609	-0.517688	-0.517688	-0.517688	0.635094	-0.517688	2	-0.517688	0.820387	-0.517688	-0.517688	-0.517688	-0.0829614	0.0302798	-0.517688	0.516187	0.311188	0.93435	-0.517688	-0.517688	-0.517688	-0.517688	-0.517688	-0.517688	-0.517688
RBP1--NM-002899--chr3---	-0.591866	-0.591866	1.32166	0.0916801	-0.591866	2	-0.591866	0.650735	-0.591866	-0.591866	-0.591866	-0.591866	-0.591866	-0.591866	0.283513	-0.591866	1.0894	-0.591866	-0.591866	-0.591866	-0.252787	-0.591866	-0.591866	1.86236	-0.275299	0.106251	-0.11341	-0.591866	-0.591866	-0.591866	-0.591866	-0.591866	1.29084	-0.591866	-0.591866	-0.591866	-0.591866	0.636828	2	-0.591866	-0.591866	-0.0422872	-0.0414947	-0.591866	-0.591866	1.49272	-0.591866	-0.591866	-0.591866
RBP4--NM-006744--chr10---	1.64254	0.112916	2	0.950915	0.86136	1.09213	0.204964	0.646766	1.71305	0.60016	1.28235	0.697948	0.985133	0.566287	0.858069	-1.87779	2	-1.87779	2	0.779462	1.19703	0.966232	0.890898	2	1.3691	1.01181	1.23575	0.912301	0.229916	1.40603	2	0.911304	2	-0.808391	0.348644	0.964356	1.24461	1.45782	2	0.186971	1.39453	1.35963	0.368465	0.705536	0.853974	1.55285	1.10166	0.155525	1.76005
RBP7--NM-052960--chr1--+	-0.298128	-0.298128	-0.298128	-0.298128	-0.298128	2	-0.298128	-0.298128	-0.298128	-0.298128	-0.298128	-0.298128	-0.298128	-0.298128	0.932363	-0.298128	-0.298128	-0.298128	-0.298128	-0.298128	-0.298128	-0.298128	-0.298128	-0.298128	-0.298128	-0.298128	-0.298128	-0.298128	-0.298128	-0.298128	-0.298128	-0.298128	-0.298128	-0.298128	-0.298128	-0.298128	-0.298128	-0.298128	-0.298128	-0.298128	-0.298128	-0.298128	-0.298128	-0.298128	-0.298128	-0.298128	-0.298128	-0.298128	-0.298128
RBX1--NM-014248--chr22--+	-0.611729	-0.611729	-0.611729	1.69964	-0.611729	2	-0.611729	0.494341	-0.611729	-0.611729	-0.611729	1.06998	-0.611729	1.70844	-0.611729	2	-0.611729	-0.611729	-0.611729	-0.611729	-0.611729	0.247648	-0.0371756	1.86444	0.26321	-0.611729	0.10754	-0.611729	0.5352	2	-0.611729	-0.611729	2	-0.611729	-0.611729	0.494456	-0.611729	0.166795	-0.611729	-0.611729	-0.611729	-0.611729	0.21565	-0.611729	-0.611729	-0.611729	-0.611729	-0.611729	-0.611729
REEP5--NM-005669--chr5---	1.17254	0.721682	-0.541014	0.622322	-0.541014	-0.541014	-0.541014	-0.541014	-0.541014	2	-0.541014	-0.541014	-0.541014	-0.541014	-0.541014	-0.541014	-0.541014	-0.541014	-0.541014	0.695287	-0.541014	-0.541014	-0.541014	-0.541014	-0.541014	-0.541014	0.273277	-0.541014	0.757435	-0.541014	-0.541014	-0.541014	-0.541014	-0.541014	-0.541014	-0.541014	0.728132	1.20181	2	-0.541014	0.3926	-0.541014	-0.541014	1.50927	-0.541014	-0.541014	-0.541014	-0.541014	-0.541014
REL--NM-001291746--chr2--+	-0.37417	-0.37417	-0.37417	-0.37417	-0.37417	-0.37417	0.648519	-0.37417	-0.37417	-0.37417	-0.37417	-0.37417	-0.37417	-0.37417	-0.37417	-0.37417	-0.37417	-0.37417	-0.37417	-0.37417	-0.37417	-0.37417	0.187842	-0.37417	0.091341	-0.37417	-0.37417	-0.37417	-0.37417	-0.37417	-0.37417	-0.37417	-0.37417	-0.37417	-0.37417	-0.37417	0.0489087	-0.0928856	-0.37417	-0.37417	-0.37417	-0.37417	-0.37417	-0.37417	-0.37417	-0.37417	-0.37417	-0.37417	-0.37417
RGS2--NM-002923--chr1--+	-0.425414	-0.425414	-0.425414	-0.425414	-0.425414	-0.425414	-0.425414	-0.425414	-0.425414	-0.425414	-0.425414	-0.425414	-0.425414	-0.425414	-0.425414	-0.425414	-0.425414	-0.425414	-0.425414	-0.425414	-0.425414	-0.425414	-0.425414	-0.425414	-0.425414	-0.425414	-0.425414	-0.425414	-0.425414	-0.425414	-0.425414	-0.425414	-0.425414	-0.425414	-0.425414	-0.425414	-0.425414	-0.425414	-0.425414	-0.425414	-0.425414	-0.425414	-0.425414	-0.425414	-0.425414	-0.425414	-0.425414	-0.425414	-0.425414
RHOA--NM-001664--chr3---	0.377763	-0.52119	-0.52119	-0.52119	0.331487	-0.52119	-0.52119	-0.52119	-0.52119	-0.52119	-0.52119	-0.52119	-0.52119	-0.52119	1.72021	-0.52119	2	-0.52119	-0.52119	-0.52119	-0.52119	-0.52119	0.553255	-0.52119	-0.0298199	-0.52119	-0.52119	0.538213	-0.52119	-0.52119	-0.52119	0.346513	-0.52119	-0.52119	-0.52119	-0.52119	-0.52119	0.502814	-0.52119	-0.52119	-0.52119	-0.52119	-0.52119	-0.52119	-0.52119	-0.52119	0.366598	-0.52119	-0.52119
RNA18S5--NR-003286--chr21--+	-1.20086	-1.33133	-1.63265	-1.03536	-1.31043	-0.78148	-1.37807	-1.11099	-1.39094	-0.268563	-0.869831	-0.485075	-1.31206	-0.4088	-0.438296	0.458861	0.119299	0.259441	-1.46936	-1.16695	-1.17089	-1.27244	-2	-1.67075	-1.861	-1.33996	-1.57003	-0.874928	-0.609363	-1.40633	-1.63606	-1.3643	-1.88493	0.389518	-0.691017	-1.16751	-1.91954	-1.12369	-1.17807	-0.299057	-1.49782	-1.12225	-1.61674	-0.558417	-1.65393	-1.52661	-1.56377	1.29989	-1.44801
RNA18S5--NR-003286-1--chr21--+	0.288133	0.534133	-0.587141	-0.587141	0.864639	-0.587141	1.20076	0.524805	-0.587141	-0.587141	1.99508	-0.587141	-0.587141	-0.587141	2	-0.587141	1.95375	-0.587141	-0.587141	-0.587141	0.712869	-0.587141	0.459003	-0.587141	0.292446	-0.587141	-0.587141	-0.587141	1.94698	-0.587141	2	0.257706	-0.587141	0.995056	-0.587141	-0.587141	0.217741	0.40989	-0.587141	0.44695	0.862818	0.243437	0.244634	-0.587141	-0.587141	-0.587141	-0.587141	-0.587141	-0.587141
RNA18S5--NR-003286-2--chr21--+	-0.501046	0.725632	2	0.629106	0.407215	-0.501046	-0.501046	-0.501046	-0.501046	1.10624	-0.501046	-0.501046	-0.501046	-0.501046	0.946276	-0.501046	-0.501046	2	-0.501046	0.69999	-0.501046	-0.501046	0.130857	-0.501046	-0.501046	-0.501046	-0.501046	-0.501046	0.760365	-0.501046	-0.501046	-0.501046	-0.501046	1.22988	1.00397	-0.501046	-0.501046	-0.501046	-0.501046	0.630253	0.405937	0.407609	1.08986	1.49076	0.197397	-0.501046	-0.501046	2	-0.501046
RNA18S5--NR-003286-3--chr22-KI270733v1-random--+	-0.0918574	-0.794271	-0.794271	-0.794271	-0.128016	1.8049	0.640529	0.71279	-0.0768057	0.384752	-0.794271	1.36322	-0.794271	1.07757	0.957087	-0.794271	-0.794271	-0.794271	-0.794271	0.0867492	0.248996	0.412808	0.0452668	-0.794271	-0.41033	-0.794271	-0.213986	-0.794271	-0.794271	1.39991	-0.794271	-0.794271	-0.794271	0.475453	-0.794271	0.0981665	-0.445327	-0.354431	-0.794271	0.620228	-0.128953	-0.127727	1.10468	0.666816	-0.794271	-0.794271	-0.100582	2	-0.794271
RNA28S5--NR-003287--chr22-KI270733v1-random--+	-0.521833	0.513115	-0.521833	-0.521833	-0.521833	2	-0.521833	0.504505	0.303366	-0.521833	-0.521833	-0.521833	-0.521833	-0.521833	-0.521833	-0.521833	-0.521833	-0.521833	-0.521833	-0.521833	-0.0488358	-0.521833	0.0113037	-0.521833	-0.521833	-0.521833	-0.521833	0.430251	-0.521833	-0.521833	-0.521833	-0.521833	0.713482	-0.521833	-0.521833	-0.521833	-0.521833	-0.255	-0.521833	-0.521833	-0.521833	0.244799	-0.521833	-0.521833	-0.521833	-0.521833	-0.521833	-0.521833	-0.521833
RNA28S5--NR-003287-2--chr21--+	0.412376	-0.465813	-0.465813	0.570669	0.367168	-0.465813	-0.465813	-0.465813	-0.465813	-0.465813	-0.465813	-0.465813	-0.465813	-0.465813	-0.465813	-0.465813	-0.465813	-0.465813	-0.465813	-0.465813	0.0483435	-0.465813	-0.465813	2	0.0142073	-0.465813	-0.465813	-0.465813	-0.465813	-0.465813	-0.465813	-0.465813	-0.465813	-0.465813	-0.465813	-0.465813	-0.465813	-0.175761	-0.465813	0.571721	-0.465813	-0.465813	-0.465813	-0.465813	-0.465813	-0.465813	-0.465813	2	-0.465813
RNA28S5--NR-003287-3--chr21--+	0.454382	-0.879229	-0.879229	-0.202018	0.0724852	-0.879229	-0.879229	-0.879229	-0.879229	-0.879229	-0.879229	-0.879229	-0.879229	-0.879229	-0.0119634	-0.879229	-0.879229	-0.879229	-0.879229	-0.879229	-0.879229	-0.312872	-0.879229	-0.879229	-0.0761791	-0.879229	-0.879229	-0.20303	-0.123365	-0.879229	-0.879229	-0.879229	-0.879229	0.15798	0.022607	-0.879229	-0.351589	-0.519934	1.13677	-0.201331	-0.879229	-0.879229	-0.333959	-0.879229	-0.879229	-0.879229	-0.31257	-0.879229	-0.879229
RNASEH2C--NM-032193--chr11---	-0.503965	-0.503965	2	-0.503965	0.407366	2	-0.503965	-0.503965	-0.503965	-0.503965	-0.503965	-0.503965	-0.503965	-0.503965	2	-0.503965	-0.503965	-0.503965	-0.503965	-0.503965	-0.503965	0.444387	-0.503965	-0.503965	-0.503965	0.654181	0.289773	-0.503965	-0.503965	-0.503965	2	-0.503965	-0.503965	-0.503965	-0.503965	-0.503965	0.379555	1.53438	-0.503965	-0.503965	-0.503965	-0.503965	-0.503965	1.49457	-0.503965	-0.503965	-0.503965	-0.503965	-0.503965
RNASEK--NM-001004333--chr17--+	-0.768366	-0.768366	1.47938	0.600407	-0.768366	1.74902	-0.768366	1.14595	-0.0734764	-0.768366	-0.768366	0.545698	-0.768366	-0.768366	0.259911	-0.768366	-0.768366	2	2	1.12678	0.488142	-0.0968622	0.0447549	1.16647	0.183773	0.0516876	0.228684	-0.768366	-0.768366	1.35677	2	-0.768366	-0.768366	-0.768366	-0.768366	-0.768366	-0.768366	0.784795	-0.768366	-0.768366	-0.123983	-0.768366	-0.768366	1.45545	-0.272144	-0.768366	-0.768366	-0.768366	-0.768366
RPL10--NM-001256577--chrX--+	-0.119891	-0.995275	-0.995275	0.341499	-0.517659	-0.995275	-0.995275	0.085086	-0.480948	-0.995275	-0.995275	-0.995275	-0.995275	-0.995275	-0.995275	-0.995275	0.466474	-0.995275	1.19525	-0.995275	-0.247392	-0.498257	-0.166665	-0.995275	-0.720041	-0.995275	-0.257303	-0.995275	0.1197	-0.995275	-0.995275	-0.509243	0.641617	-0.995275	-0.203852	0.0851839	-0.745129	0.23125	-0.995275	0.0187314	-0.995275	-0.995275	-0.158684	0.0521293	-0.627993	-0.995275	-0.995275	-0.995275	-0.995275
RPL10--NM-001303624--chrX--+	0.0889579	-0.904607	-1.45678	0.544332	-1.04794	-1.45678	-0.296685	-0.0108074	-0.0459609	-0.281302	-0.482265	0.216987	-1.45678	-1.45678	-0.382078	-1.45678	0.400792	-1.45678	1.12768	-0.256061	0.161465	-0.257548	0.283289	-0.230913	-0.450972	-0.573402	0.817893	-0.590694	-0.502358	-1.45678	-1.45678	0.0524138	0.874551	-0.677627	0.22782	-0.243818	-0.231017	0.618435	0.714954	-0.947541	-0.119709	-0.741574	0.172586	-0.047827	0.0213589	0.75815	-1.0311	-1.45678	0.492633
RPL10--NM-001303625--chrX--+	-0.436503	-0.436503	-0.436503	-0.436503	-0.436503	-0.436503	0.760778	-0.436503	-0.436503	-0.436503	-0.436503	-0.436503	-0.436503	-0.436503	-0.436503	-0.436503	-0.436503	-0.436503	-0.436503	-0.436503	0.147235	-0.436503	1.2042	-0.436503	0.108479	0.765331	-0.436503	-0.436503	-0.436503	-0.436503	-0.436503	1.24316	-0.436503	-0.436503	-0.436503	-0.436503	-0.436503	0.924054	-0.436503	-0.436503	-0.436503	-0.436503	-0.436503	-0.436503	-0.436503	-0.436503	-0.436503	-0.436503	-0.436503
RPL10--NM-001303626--chrX--+	0.205555	-0.626295	-0.626295	1.04737	-0.626295	-0.626295	-0.626295	-0.626295	0.223381	-0.626295	-0.626295	0.980476	-0.626295	-0.626295	-0.626295	-0.626295	1.78854	-0.626295	-0.626295	0.417074	-0.626295	-0.626295	0.742581	-0.626295	-0.171603	-0.626295	0.0609213	-0.626295	0.469524	-0.626295	-0.626295	-0.626295	-0.626295	-0.626295	-0.626295	0.430596	-0.213049	0.117536	-0.626295	-0.626295	-0.626295	0.163076	-0.626295	1.10403	0.462976	2	0.195223	1.96456	-0.626295
RPL10--NM-006013--chrX--+	-0.0260129	-1.44309	-0.0324909	0.100473	-0.824028	0.133067	-0.528799	0.219025	-0.761621	-1.00922	-1.41058	0.133312	-0.0469233	-1.27884	-0.067629	-2	-0.436893	-0.29128	0.39243	-0.789338	-0.0197745	0.0371876	0.174945	0.348378	-0.323692	0.0334581	-0.426905	-0.63524	-1.71829	-0.65536	0.401011	-0.283041	0.238881	-2	0.365466	-0.247351	-0.806868	0.820373	0.537322	-1.7626	-0.663868	-0.590999	-0.24899	-0.8093	0.20951	-0.148156	-0.883981	-2	0.210706
RPL10A--NM-007104--chr6--+	-0.103712	-1.03279	0.382201	0.0646312	-0.461039	0.569299	-1.06512	0.143931	-0.835133	-0.449942	-1.00527	0.0160078	-1.54913	-1.54913	0.17702	-1.54913	-0.379079	-1.54913	0.867599	-1.04359	-0.559174	-0.622188	0.0780068	-1.54913	-0.0989164	-1.54913	-0.159876	-0.480385	-0.160907	0.295555	1.06338	0.209612	0.35673	-1.54913	0.222442	-0.68428	-0.325101	0.855301	0.481656	-1.07294	-0.652768	-0.65142	0.0890109	-0.23162	0.750571	-0.0983896	-0.427278	-1.54913	0.273764
RPL11--NM-000975--chr1--+	-0.0677519	-0.484726	-1.95363	0.529702	-0.918462	-1.95363	-0.270907	0.675389	-0.558753	-0.907905	-0.82238	0.896489	-1.95363	-0.931783	-0.495962	-1.95363	0.72455	-1.95363	0.742794	-1.14002	-0.449346	-0.35783	0.823269	0.512338	-0.288535	0.138207	-0.432453	-0.419863	-0.456528	-0.198665	1.04346	0.178416	0.72732	-1.95363	1.05399	-0.874558	-0.534887	0.91967	-0.606373	-1.18145	-0.398365	-1.31737	0.0290116	-0.379675	0.465396	-0.57345	-0.886343	-1.95363	0.419444
RPL11--NM-001199802--chr1--+	-0.206327	-1.28374	0.247851	0.394846	-0.844046	-1.28374	-0.727082	0.271355	-0.81025	-1.28374	-0.235683	1.04793	-1.28374	-1.28374	-0.583084	-1.28374	0.714017	-1.28374	-1.28374	-0.300162	-0.145182	-0.826185	0.88477	-1.28374	-0.0844132	-0.0323383	-0.900782	-0.737445	-1.28374	0.164304	-1.28374	-0.0156235	0.492996	-1.28374	0.527992	-0.289068	-0.686865	0.789464	-1.28374	-0.736072	-0.844665	-1.28374	-0.0305324	-1.28374	0.51876	-1.28374	-0.486753	-1.28374	-1.28374
RPL12--NM-000976--chr9---	0.108361	-1.2168	0.52212	0.460359	-0.666501	0.713098	-0.921346	0.624261	-0.796516	-1.71375	-1.1903	0.406872	-0.218719	-0.155685	-0.239072	-1.71375	-0.587617	-1.71375	0.612265	-0.424432	-0.130156	-0.634442	0.924772	0.563119	0.113565	-0.00735111	-0.271126	-0.481983	-0.199178	-0.501962	0.408324	0.071192	0.854988	-1.71375	0.418042	0.0493895	-0.465528	1.01334	0.907695	-0.0286457	-0.140336	-0.666156	-0.507557	0.653654	0.310677	-1.71375	-1.71375	-0.505529	1.24959
RPL13--NM-000977--chr16--+	-0.295592	-0.622026	-0.200487	0.510164	-0.710387	-0.0268763	-0.805005	0.860366	-0.641114	-0.614288	-0.99713	0.146731	-2	-0.816651	-0.338372	-2	0.0641618	-2	0.514019	-0.43759	-0.28917	-0.866739	0.300034	-0.163216	-0.387071	-0.0993754	0.119845	-0.597285	-0.856189	-0.619042	1.27868	-0.113297	1.13693	-1.59556	0.381095	-1.24064	-0.696486	0.887249	0.670702	-0.820146	-0.291364	-0.549443	-0.54806	-0.557958	0.404627	-0.0705604	-0.764934	-1.13468	-0.0505891
RPL13--NM-001243130--chr16--+	1.00816	-0.590848	-0.590848	0.494721	-0.590848	-0.590848	-0.590848	0.577637	-0.590848	-0.590848	-0.590848	-0.590848	-0.590848	-0.590848	0.799378	-0.590848	-0.590848	-0.590848	-0.590848	1.36075	0.394041	0.317023	0.0161274	-0.590848	0.333463	-0.590848	0.169009	-0.590848	-0.590848	-0.590848	2	0.296957	-0.590848	-0.590848	-0.590848	-0.590848	0.254959	-0.0148973	-0.590848	-0.590848	0.280355	-0.590848	0.28322	-0.590848	-0.590848	-0.590848	0.317507	-0.590848	-0.590848
RPL13--NM-001243131--chr16--+	0.321648	-0.549408	-0.549408	1.76305	0.276809	-0.549408	-0.549408	-0.549408	-0.549408	-0.549408	-0.549408	-0.549408	-0.549408	-0.549408	-0.549408	-0.549408	-0.549408	-0.549408	-0.549408	1.29881	-0.549408	0.310371	0.883985	1.92792	0.325941	0.500571	-0.549408	-0.549408	0.598058	-0.549408	-0.549408	0.291368	0.782498	-0.549408	0.819656	-0.549408	-0.116686	0.442819	-0.549408	-0.549408	0.275646	0.277167	0.278359	1.26247	0.591202	-0.549408	-0.549408	-0.549408	-0.549408
RPL13--NM-033251--chr16--+	-0.318352	-0.905767	-0.905767	0.276099	-0.348591	-0.905767	-0.905767	1.06483	-0.305765	-0.905767	0.422321	1.37528	-0.905767	-0.905767	-0.0179024	-0.905767	0.799475	-0.905767	-0.905767	-0.168987	-0.905767	-0.905767	0.49007	-0.905767	-0.315458	-0.197692	-0.0448652	-0.905767	-0.13195	-0.905767	-0.905767	-0.905767	0.573473	0.156078	0.0174891	0.354672	-0.905767	1.16966	-0.905767	-0.905767	0.0673303	-0.905767	0.070181	0.316111	0.786956	-0.905767	-0.325648	0.923777	-0.905767
RPL13A--NM-001270491--chr19--+	-0.00896083	-0.709019	-0.709019	0.699484	-0.0449982	-0.709019	-0.709019	0.180333	-0.709019	-0.709019	0.235609	0.643188	-0.709019	-0.709019	-0.709019	-0.709019	-0.709019	-0.709019	-0.709019	0.169047	-0.709019	-0.0180242	0.127704	-0.709019	-0.326365	0.134837	0.682246	-0.709019	-0.709019	-0.709019	-0.709019	-0.0332967	-0.709019	1.32414	1.09594	-0.709019	-0.065262	0.656327	-0.709019	-0.709019	-0.0459324	-0.0447099	0.454079	-0.709019	0.207676	-0.709019	-0.709019	-0.709019	-0.709019
RPL13A--NM-012423--chr19--+	-0.062886	-0.789415	-1.89304	-0.201573	-0.311286	-0.451246	-0.0651755	0.105347	-0.617699	-1.89304	-0.191441	0.384401	-0.391409	-1.89304	-0.92154	-0.207137	-0.213847	-1.89304	-0.198007	-0.016937	-0.243714	-0.0766963	-0.469792	-0.241913	0.0285862	-0.0610055	0.0396784	-0.48358	-0.551027	-0.675902	-1.89304	0.138667	0.214419	-1.18871	-0.0184546	-1.39799	-0.709755	0.542906	0.454901	-0.857808	-0.312681	-0.0328603	-0.420139	-1.89304	0.758741	-1.89304	-0.808531	-0.679486	0.240598
RPL13A--NR-073024--chr19--+	-0.478315	-0.478315	-0.478315	-0.478315	0.443416	-0.478315	-0.478315	-0.478315	0.514263	-0.478315	-0.478315	-0.478315	-0.478315	-0.478315	-0.478315	-0.478315	-0.478315	-0.478315	-0.478315	-0.478315	-0.478315	0.480859	0.683144	-0.478315	0.0528489	-0.478315	0.32448	-0.478315	0.801803	-0.478315	-0.478315	0.459659	1.00756	-0.478315	1.04902	1.60682	-0.478315	0.390617	-0.478315	0.669762	-0.478315	-0.478315	-0.478315	-0.478315	0.230487	-0.478315	-0.478315	-0.478315	-0.478315
RPL13AP5--NR-026712--chr10--+	-0.199238	-0.880866	-0.880866	1.58738	-0.234327	-0.880866	0.511475	1.40579	-0.880866	-0.880866	-0.880866	0.43574	-0.880866	-0.880866	-0.880866	-0.880866	1.09787	-0.880866	-0.880866	-0.0259173	-0.150987	0.290492	0.94689	-0.880866	0.519825	-0.0592261	0.47377	-0.0775777	0.0170605	-0.880866	-0.880866	1.50577	-0.880866	-0.880866	-0.880866	0.581729	-0.542248	1.14779	1.51404	-0.880866	0.635021	0.637301	0.25161	-0.880866	1.27897	-0.880866	0.291047	-0.880866	1.21772
RPL14--NM-003973--chr3--+	-0.327895	-0.946399	-0.450368	0.548146	0.0923857	1.15148	-1.36324	0.45129	-0.165284	-1.88447	-1.29878	0.797525	0.47372	-1.88447	-0.802234	-1.88447	-0.624438	-1.88447	0.00377122	-0.675333	-0.60072	-0.67683	0.690971	0.663125	-0.0578566	0.275278	-0.270315	-0.506243	-0.189812	-1.88447	0.489925	0.112706	0.167957	-1.09985	0.20379	-1.333	-0.414045	1.0735	-1.88447	-1.01039	-0.123974	-0.245218	0.09456	-0.981604	0.125421	-1.88447	-1.13821	-1.88447	0.0786113
RPL15--NM-001253380--chr3--+	0.322741	-0.844127	1.37353	-0.0519393	0.269169	-0.844127	-0.0381176	1.04456	0.344886	-0.844127	0.6734	1.2175	-0.844127	-0.844127	0.170383	-0.844127	2	-0.844127	-0.844127	-0.00225287	0.395559	-0.181613	0.260392	-0.844127	-0.169616	-0.844127	-0.289626	-0.844127	-0.844127	-0.844127	-0.844127	0.992033	1.72849	-0.844127	0.210823	-0.844127	-0.226904	1.06908	-0.844127	-0.0511351	-0.208371	-0.207199	-0.206281	-0.844127	0.0347843	-0.844127	-0.18126	-0.844127	-0.844127
RPL15--NM-001253383--chr3--+	-0.735091	-0.735091	-0.735091	1.45925	-0.0803154	-0.735091	-0.735091	-0.735091	0.48777	0.423617	0.196385	1.38522	-0.735091	1.1045	0.3083	-0.735091	-0.735091	-0.735091	-0.735091	0.130749	0.00408677	-0.735091	0.400871	1.22819	-0.357765	-0.735091	-0.164804	-0.735091	0.793456	-0.735091	-0.735091	1.15334	1.00327	-0.735091	1.04474	0.14197	-0.735091	1.14174	-0.735091	-0.735091	-0.735091	-0.0800311	1.13114	-0.735091	-0.735091	-0.735091	-0.0533537	-0.735091	-0.735091
RPL15--NM-002948--chr3--+	-0.800154	-0.866799	0.605878	0.259048	-0.840114	-0.237601	0.0436605	0.713516	-1.33274	-1.75029	-0.826041	0.775664	-1.75029	-0.660899	0.16867	-1.75029	-0.563569	-1.75029	-1.75029	-0.391604	-0.215511	-0.810143	-0.0999702	0.649083	0.0248674	-0.430529	0.131595	-0.666319	-0.845098	0.804229	-0.161518	-1.06161	1.03472	-1.01133	0.364726	-0.87312	-0.763758	1.14748	0.713105	-1.26732	-0.0922218	-0.839792	-0.0888094	-0.0722963	0.26906	0.3504	-0.809736	-1.75029	-1.75029
RPL17--NM-000985--chr18---	-0.529785	-0.529785	-0.529785	-0.529785	-0.529785	-0.529785	-0.529785	-0.529785	-0.529785	-0.529785	-0.529785	-0.529785	-0.529785	-0.529785	1.7289	-0.529785	-0.529785	-0.529785	-0.529785	-0.529785	-0.529785	-0.529785	-0.529785	-0.529785	-0.529785	-0.529785	-0.529785	0.53779	-0.529785	-0.529785	-0.529785	0.344611	-0.529785	-0.529785	-0.529785	-0.529785	-0.0797596	1.07197	-0.529785	-0.529785	-0.529785	-0.529785	0.331082	-0.529785	0.656434	-0.529785	-0.529785	-0.529785	-0.529785
RPL17--NM-001035006--chr18---	-0.503595	-0.885861	-0.474959	0.104381	-0.546447	0.226881	-0.695204	-0.028832	-0.354975	-1.66294	-1.66294	0.763461	-1.66294	-1.66294	0.0248884	-1.66294	-0.619155	-1.66294	-0.0987581	-1.21196	-0.446267	-0.166571	0.436773	-0.640337	-0.309804	-0.692288	-0.0077206	-0.362286	-0.424527	-1.66294	0.303962	-0.403989	0.0372506	-1.66294	0.31297	-0.891421	-0.714902	1.04926	-0.399627	-1.66294	-0.863309	-1.32174	-0.108696	-0.487609	0.538083	-0.368756	-0.662153	-1.66294	-1.66294
RPL17--NM-001199345--chr18---	0.0862725	-0.675998	-0.675998	0.857675	0.0470327	-0.675998	-0.675998	1.46894	0.102607	-0.675998	-0.675998	2	-0.675998	-0.675998	-0.675998	-0.675998	-0.675998	-0.675998	-0.675998	-0.675998	-0.229708	-0.675998	1.13534	-0.675998	0.654979	-0.675998	-0.675998	-0.675998	0.328162	-0.675998	-0.675998	0.608169	-0.675998	-0.675998	-0.675998	-0.675998	-0.675998	0.19231	-0.675998	-0.675998	-0.675998	-0.675998	0.0483896	-0.675998	0.689261	-0.675998	-0.675998	-0.675998	-0.675998
RPL18--NM-000979--chr19---	-0.707325	-0.180959	0.661832	0.475283	-0.465172	-1.75354	-0.992946	-0.335262	-0.873127	-1.75354	-1.75354	0.281957	-1.75354	-1.75354	0.246988	-1.75354	-1.75354	-1.75354	-0.1337	-0.515979	-0.292793	-0.429914	0.489636	0.641058	-0.479122	-0.241977	0.0934423	-0.406605	-0.929044	-1.75354	-0.306405	0.0414366	0.553731	-1.75354	0.587327	-1.75354	-0.375857	1.10899	0.979187	-1.75354	-0.598483	-0.747999	-0.240178	-0.225137	-0.158526	-0.413304	-1.11336	-1.75354	0.550852
RPL18--NM-001270490--chr19---	-0.817135	-0.00330846	1.28182	-0.0673478	-0.817135	-0.817135	-0.0542659	-0.817135	0.308238	-0.817135	-0.817135	0.409945	-0.817135	-0.817135	-0.817135	-0.817135	1.02705	-0.817135	-0.817135	-0.0203207	-0.136886	-0.817135	0.692439	-0.817135	0.0719775	-0.817135	-0.292312	0.459359	-0.817135	-0.817135	-0.817135	-0.817135	0.15425	0.331231	0.18135	-0.817135	-0.817135	0.306143	1.41492	-0.0665866	-0.215407	0.236982	-0.213428	-0.817135	0.0147341	-0.817135	-0.189747	1.16148	-0.817135
RPL18A--NM-000980--chr19--+	-0.189393	-1.76248	0.558096	0.316659	-0.86605	-0.27264	-0.67884	0.190944	-0.810496	-1.76248	-1.2192	0.725317	0.424959	-1.76248	-0.231934	-1.76248	-0.593683	-1.76248	0.651657	-0.0851866	-0.32306	-0.202573	-0.137088	0.600648	-0.45975	-1.27715	-0.63125	-0.484047	-0.375746	-1.76248	-0.197707	-0.496562	1.0525	-1.03468	0.671998	-0.411701	-0.466969	0.621915	1.19239	-1.76248	-0.676717	-1.09441	-0.367601	-0.446383	0.44089	-0.313296	-0.641831	-1.76248	-0.52289
RPL19--NM-000981--chr17--+	-0.497246	-1.25938	-0.83124	0.513926	-0.905728	0.551371	-0.424987	0.114212	-0.706222	-1.44021	-1.56354	-0.0210415	-0.625216	-1.07068	-0.310422	-2	-0.981486	-2	-0.439256	-1.02542	0.0640122	-1.02671	0.622004	0.34027	-0.659157	-1.30125	-0.418103	-1.07565	-0.327842	0.00418999	-0.0196393	-0.18674	0.672934	-1.39184	0.286208	-1.26518	-0.682903	0.911777	0.861268	-2	-0.549517	-0.772385	-0.54639	-0.28951	0.259931	-0.720581	-0.871754	-0.902208	-0.374659
RPL21--NM-000982--chr10---	-0.075168	-0.291383	-0.320306	-0.035854	-0.989066	-1.66324	-1.17515	0.524031	-0.332846	-0.554772	-0.464115	-0.0848879	-1.66324	-0.580083	-0.649803	-1.66324	-0.48331	-1.66324	-1.66324	-0.53097	-0.4611	-0.728471	-0.265346	-1.66324	-0.516963	-0.565982	-0.521234	-0.192938	-1.1278	-0.393562	0.56021	-0.24008	-0.341934	-0.928504	0.292266	-0.791088	-0.355388	0.845788	-1.66324	-1.66324	-0.567135	-0.988805	-0.0112684	-0.81777	0.457898	0.829193	-0.964423	-1.66324	-0.411842
RPL21--NM-000982-1--chr13--+	0.0502394	-0.675222	1.7217	-0.675222	0.0128944	-0.675222	-0.675222	-0.675222	0.0657851	-0.675222	0.964977	-0.675222	-0.675222	1.25804	-0.675222	-0.675222	-0.675222	-0.675222	-0.675222	-0.675222	-0.250483	0.0408472	-0.19648	1.38803	-0.278683	-0.675222	0.387998	0.782481	-0.675222	-0.675222	-0.675222	-0.675222	-0.675222	-0.675222	0.465007	-0.675222	-0.675222	0.314746	-0.675222	-0.675222	0.0119263	0.0131932	-0.675222	1.69618	0.274738	-0.675222	-0.675222	-0.675222	-0.675222
RPL22--NM-000983--chr1---	-0.408559	-0.911288	-1.52866	1.07022	-0.0322048	1.48623	-0.231585	0.661562	-1.52866	-0.719736	-0.439077	0.646721	1.08962	-1.52866	-0.327061	-1.52866	-0.129655	-1.52866	-1.52866	-0.186164	-0.103321	-1.05297	0.857514	0.513534	0.120772	-0.540976	0.383162	-0.560309	0.131207	-1.52866	0.344313	0.158734	1.45755	-1.52866	0.789918	-0.172475	-0.751113	0.910575	0.899505	-1.52866	-0.456899	-0.0317398	0.140956	-0.526213	0.239091	-1.52866	0.0114971	-1.52866	0.650933
RPL23--NM-000978--chr17---	-0.310673	-1.16405	-1.16405	0.396334	-0.349852	0.652366	0.157126	0.482698	0.237369	-1.16405	-0.0542222	1.05175	-1.16405	-1.16405	-1.16405	0.959902	0.260949	-1.16405	-1.16405	-0.122502	-0.257418	0.201698	0.524184	-1.16405	-0.477035	-0.158014	0.0278558	0.394618	0.257151	-1.16405	-1.16405	0.178806	0.431689	-1.16405	0.465828	0.217334	0.0205663	1.9972	-1.16405	-0.584102	-0.0723754	0.161567	-0.697566	1.16761	0.519331	-1.16405	-0.32009	-1.16405	-1.16405
RPL23A--NM-000984--chr17--+	-0.170506	-1.33156	-0.0482612	-0.00311461	-0.985967	0.121422	-0.623005	0.471367	-1.15229	-0.802953	-0.973383	0.336756	-1.79983	-1.79983	-0.234345	-1.79983	-0.224493	-1.79983	-0.209633	-0.584917	-0.15035	-0.383596	-0.143659	-0.76022	-0.424189	-1.05067	-0.0498206	-1.06534	-0.227944	-0.657972	0.199786	-0.650508	0.46522	-1.79983	0.410427	-0.407408	-1.32916	0.618766	0.402896	-1.06372	-0.136379	-0.812691	-0.984721	-0.299397	0.32595	-0.484121	-0.958803	-0.661334	-0.674412
RPL24--NM-000986--chr3---	-0.278512	-0.3674	1.18608	0.873978	-0.651979	0.424899	-0.433004	0.477712	-0.793166	-1.08212	-0.83679	0.112333	-1.78922	-0.0972676	-0.187821	-1.78922	0.0262547	0.609102	0.0433802	0.355546	-0.0060361	-0.443442	0.986838	-0.00408932	-0.203882	0.412132	-0.337212	-0.104218	-1.78922	-0.4733	0.515208	-0.63681	0.028852	-1.78922	-0.142797	-0.0195637	-0.509901	1.15968	0.333297	-0.669969	0.0281236	-0.480726	-0.329768	-0.412197	0.789503	-1.78922	-1.37319	-1.78922	-0.492246
RPL26--NM-000987--chr17---	0.115697	-0.853516	-0.324936	0.82454	-1.10559	0.496978	-0.260338	0.684686	-0.178836	-1.48659	-0.805208	1.09027	0.29103	-1.11855	-0.514887	-0.498405	0.317749	-2	0.124433	-1.32119	-0.0916505	-0.373488	1.20038	0.286727	-0.233659	0.328255	-0.468594	-0.102329	-0.827732	-0.405151	-0.071734	-0.10077	0.495926	-1.43841	0.653097	-1.31226	-0.531818	1.08463	-0.232864	-1.12152	0.000458096	-0.953896	-0.411614	-0.581292	0.306557	0.175199	-0.666742	-2	-0.425324
RPL27--NM-000988--chr17--+	-0.998489	-1.45928	0.0631836	0.209304	-0.694983	-1.45928	-1.45928	0.776386	-0.643002	-0.202627	-0.099851	-1.45928	-1.45928	-1.45928	0.0253619	-1.45928	1.28264	-1.45928	0.545307	-0.88132	0.421783	-0.66742	-0.364324	0.493382	-0.384016	0.233764	-0.54352	-0.237431	-0.852266	-0.0198658	1.06142	-0.0104574	0.306869	-0.626324	-0.735039	-0.162554	-0.458989	0.38331	-1.45928	-0.914879	-0.695941	-0.694687	-0.0265121	0.729487	-0.131433	-1.45928	-0.399091	-1.45928	-0.0405899
RPL27A--NM-000990--chr11--+	-0.417988	-0.491684	0.0249099	0.865713	-0.248298	-1.46864	-0.0133206	0.849818	-0.667863	-0.235852	-0.858674	0.571867	0.273497	-1.46864	-0.0121935	0.487284	1.47603	-1.46864	0.497876	-0.209381	-0.797239	-0.691817	0.356267	0.867921	-0.193804	-0.00926172	0.0894708	-0.935915	-0.873152	-1.46864	-1.46864	-0.0473324	0.000856892	-0.651501	0.518258	-0.498674	-0.739304	0.485584	-1.46864	-1.46864	-0.463331	-0.718566	-0.246559	-0.528348	0.890396	-1.46864	-0.691449	-0.0607196	-0.0768926
RPL28--NM-000991--chr19--+	-0.768126	-0.571698	0.258075	0.55648	-0.806384	0.081691	-0.6258	0.280285	-0.752428	-1.16111	-0.719335	0.60013	-1.74424	-0.348927	0.312425	-1.74424	-0.247061	-1.74424	0.338804	-1.00712	-0.381371	-0.298458	0.0625228	0.294791	-0.38259	-0.622681	-0.144979	-0.823059	-0.738428	0.426637	0.156167	-0.417614	0.79838	-1.74424	0.516698	-0.578716	-0.75629	0.505611	0.00614947	-1.04465	-0.163319	-0.665156	-1.16705	0.375869	-0.0281582	0.0409654	-0.944937	-1.74424	-0.674656
RPL28--NM-001136134--chr19--+	0.393756	-0.914057	-0.914057	-0.249947	-0.380336	-0.914057	0.235326	0.293212	-0.339313	0.0304294	-0.154793	0.814255	-0.914057	-0.914057	-0.914057	-0.914057	-0.914057	-0.914057	-0.914057	-0.914057	-0.914057	-0.358656	-0.914057	0.686251	-0.348598	0.239148	-0.914057	-0.914057	-0.172815	0.843645	-0.914057	-0.370931	0.502913	-0.914057	-0.0296667	-0.199147	-0.189543	-0.146213	-0.914057	-0.249272	-0.381087	-0.380105	-0.914057	-0.914057	-0.503631	-0.914057	-0.914057	-0.914057	-0.914057
RPL29--NM-000992--chr3---	-0.570153	-1.88855	0.0707302	-0.251435	-0.473771	-0.375527	-0.0942039	0.311797	-0.721207	-0.773454	-0.455555	1.23073	-0.312733	-0.798916	-0.334187	-1.88855	-0.126399	-1.88855	1.29659	-0.344661	-0.0992008	-0.435054	-0.679436	0.932696	-0.647386	-0.0899447	-0.47919	-0.590223	-1.88855	-0.0171701	0.761764	-0.456881	0.323023	-1.88855	0.681992	-1.01118	-0.375693	0.973731	0.874545	-0.802173	-0.124585	-0.473353	0.0651319	0.0536553	0.245268	-1.88855	-0.947785	-1.88855	-0.0392758
RPL3--NM-000967--chr22---	-0.344731	-0.661412	0.315524	0.515255	0.0130825	1.23365	-0.0882073	0.239473	-0.081945	-1.2192	-1.10647	1.25816	0.148392	-0.567578	-0.432999	-0.410673	-2	-2	0.956563	-0.163954	-0.534317	-0.362269	0.0901343	0.36894	-0.338091	-0.374316	-0.177863	-0.769264	-1.13425	0.199408	0.167261	-0.523237	0.136151	-1.12967	1.22534	-0.145221	-0.727527	1.52796	0.448095	-1.57975	-0.54758	-1.02765	-0.543361	-0.196813	0.395124	-0.000340085	-0.800256	-2	0.53036
RPL3--NM-001033853--chr22---	0.12822	-0.454181	1.50582	1.25425	0.337796	-1.16939	-0.498964	1.17578	-0.180387	-0.232272	-1.16939	0.545438	-1.16939	0.3184	0.222634	-1.16939	0.451324	-1.16939	-1.16939	-0.469132	-0.340174	-0.209972	1.08446	-1.16939	-0.388018	0.337768	-0.0598559	-1.16939	-1.16939	-1.16939	-1.16939	0.585998	-0.315716	0.452058	0.684342	0.0285695	-0.105422	0.559461	0.79219	-0.509791	-0.244528	-1.16939	-0.241819	0.65558	1.11564	-1.16939	-0.618027	-1.16939	-1.16939
RPL30--NM-000989--chr8---	-0.357764	-1.79271	0.545405	0.798049	-0.658621	-0.308239	-0.416946	0.611389	-0.412318	-1.64427	-0.96229	0.710655	0.134904	-2	-0.851437	-2	0.161646	-2	0.861322	-0.587219	-0.323032	-0.170502	0.718063	0.130596	-0.429282	-0.515155	-0.300255	-0.258798	0.0220251	-1.10453	0.149565	-0.194627	0.27315	-2	-0.218821	-0.261302	-0.600948	0.625919	1.26265	-1.27888	0.00351173	-0.658198	-0.211355	-1.05035	0.544382	0.293419	-0.823704	-2	-0.582076
RPL31--NM-000993--chr2--+	1.09424	-0.429087	0.628269	0.794013	-1.09867	-1.09867	-1.09867	1.58208	-1.09867	-0.221333	0.0830625	0.931004	-1.09867	-1.09867	-1.09867	-1.09867	-1.09867	-1.09867	1.17514	-0.443084	0.447216	-0.582756	-0.753745	-1.09867	0.12101	-1.09867	-0.0599165	-0.482698	-1.09867	0.534065	0.932711	0.544737	1.15712	-1.09867	0.24896	-0.434588	-0.255364	1.07857	-1.09867	-1.09867	-0.232808	-0.231386	-0.230272	-0.0114432	0.818589	0.782653	-0.582481	-1.09867	0.510558
RPL31--NM-001099693--chr2--+	1.22529	-0.488306	-0.488306	0.675057	-0.488306	-0.488306	-0.488306	-0.488306	-0.488306	1.16621	-0.488306	-0.488306	-0.488306	-0.488306	1.00155	-0.488306	-0.488306	-0.488306	-0.488306	-0.488306	0.567163	-0.488306	-0.488306	-0.488306	0.0504763	-0.488306	-0.488306	-0.488306	-0.488306	-0.488306	-0.488306	1.17225	2	-0.488306	-0.488306	-0.488306	-0.488306	0.393089	-0.488306	-0.488306	-0.488306	-0.488306	-0.488306	-0.488306	0.230662	-0.488306	-0.488306	-0.488306	-0.488306
RPL32--NM-000994--chr3---	-0.679437	-1.65012	0.274102	0.679004	-0.728058	-0.18086	-0.111347	0.604379	-0.455043	-0.426924	-0.161361	0.370759	-0.115418	-0.639037	0.0646407	-2	0.284211	-2	0.755741	-1.09395	-0.455678	-0.243414	0.63601	0.253479	-0.38248	-0.623112	-0.29014	-0.409102	-1.05347	-0.0781073	-0.101618	-0.196233	0.581696	-1.45547	0.281987	-1.3305	-0.756015	0.809416	0.103768	-0.947782	-0.0884431	-0.358955	-0.28247	0.257074	0.473112	-0.224192	-1.27319	-2	-0.0995344
RPL32--NM-001007074--chr3---	-0.318391	-0.151785	1.04739	0.973155	-0.348907	-0.91118	0.299692	1.34673	-0.305689	-0.91118	-0.91118	0.909591	-0.91118	-0.91118	-0.91118	-0.91118	0.809663	-0.91118	-0.91118	-0.91118	-0.564117	-0.91118	0.29473	-0.91118	-0.31547	-0.91118	-0.42146	-0.91118	-0.130283	0.940554	-0.91118	-0.338998	0.581593	-0.91118	0.0205227	-0.158024	-0.147906	0.778515	-0.91118	-0.91118	0.68741	0.0724331	0.0736967	0.321876	0.607794	-0.91118	-0.91118	-0.91118	-0.91118
RPL34--NM-000995--chr4--+	-0.0340759	-0.620386	0.461968	0.615137	-1.11935	0.0129053	-0.184972	0.360345	-0.162869	-1.50963	-0.579363	0.559982	0.0760935	-0.413147	-1.50963	-1.50963	-1.50963	-1.50963	-1.50963	0.585228	0.290969	-1.1035	1.07456	0.617146	-0.549491	0.160678	-0.510564	-0.203141	-0.598544	-1.50963	0.0894835	0.0615991	0.435966	-1.50963	0.469934	-1.50963	-0.725498	0.548366	0.563497	-1.02351	-0.828018	-0.398486	-0.592126	-0.653758	0.395643	-1.50963	-1.10328	-1.50963	-0.242837
RPL35--NM-007209--chr9---	-0.335769	-0.786378	1.66777	-0.00539302	-0.758711	-1.70239	-0.561634	0.471432	-0.492348	-0.990954	-0.216979	0.774983	-0.0689336	-1.70239	0.439539	-1.70239	-0.471988	-1.70239	1.27807	-0.521687	0.15241	-0.0602632	0.599102	0.488406	0.0812682	-0.334052	0.0757981	-0.00705644	-0.242564	0.237441	-0.0551405	-0.0838643	1.26097	-0.936225	0.626785	-1.70239	-0.894654	0.539163	-1.70239	-1.20164	-0.387608	-0.235428	0.2301	0.310857	-0.248891	1.20813	-1.28381	-1.70239	-1.70239
RPL35A--NM-000996--chr3--+	-0.584186	-1.19329	0.592803	0.44501	-0.628066	-1.70373	-1.22525	1.02813	-0.254288	-1.70373	-0.122505	0.758291	-1.70373	-1.70373	-0.419954	-1.70373	-1.70373	-1.70373	-1.70373	-0.37943	-0.620778	-0.430821	0.830859	0.355813	-0.580033	-0.41737	-0.450189	-0.903103	-1.17884	-1.70373	-0.155168	-0.450927	-1.70373	-0.983466	0.0476071	-0.848757	-1.06086	0.817901	-0.303771	-0.645082	-0.629216	-1.70373	0.0186278	0.398343	0.476812	0.343792	-1.31023	-1.70373	-0.476983
RPL36--NM-015414--chr19--+	-0.714426	0.136511	-0.714426	-0.714426	-0.714426	-0.714426	-0.714426	0.129432	-0.0359452	-0.714426	-0.714426	1.32583	-0.714426	-0.714426	0.941769	-0.714426	-0.714426	2	-0.714426	-0.714426	-0.714426	-0.714426	0.0794942	2	-0.714426	-0.714426	-0.165672	-0.714426	-0.714426	-0.714426	-0.714426	-0.714426	0.958296	-0.714426	1.4911	-0.714426	-0.714426	0.192008	-0.714426	-0.714426	-0.714426	-0.714426	-0.714426	0.667271	0.155376	-0.714426	-0.0584293	-0.714426	-0.714426
RPL36--NM-033643--chr19--+	0.195829	-0.687581	1.19084	0.715746	-0.905816	-1.6261	-0.457313	0.0279734	-0.599315	-1.6261	-0.104189	1.3044	0.0474958	-1.6261	0.233689	-1.6261	0.957917	-1.6261	-1.6261	-0.416385	0.212105	-0.417883	0.405354	-0.391049	-0.502576	-0.0305545	-0.259908	-0.0552311	-0.664529	0.777055	1.76811	0.268804	0.583815	-1.6261	0.463162	0.028091	-1.41037	0.182815	0.56191	-1.11305	-0.455024	-0.658892	-1.21343	-0.722803	0.453713	-1.6261	-0.626964	-1.6261	-0.289109
RPL36A--NM-021029--chrX--+	-0.602183	-0.602183	2	-0.602183	0.19432	-0.602183	-0.602183	0.464609	0.255542	-0.602183	-0.602183	-0.602183	-0.602183	-0.602183	1.49155	-0.602183	-0.602183	-0.602183	-0.602183	0.45107	-0.110543	0.226676	-0.602183	-0.602183	-0.143184	-0.602183	0.0915432	0.387427	-0.602183	-0.602183	-0.602183	0.812478	1.51245	-0.602183	-0.602183	-0.602183	-0.185023	0.148694	-0.602183	-0.602183	0.193199	-0.602183	-0.602183	1.14454	0.0103197	-0.602183	-0.602183	-0.602183	-0.602183
RPL36AL--NM-001001--chr14---	-0.690093	-0.104106	-1.19473	0.825756	-0.35771	-1.19473	-0.163922	-0.112007	-0.67928	-0.347681	0.294046	-0.219991	-1.19473	0.150066	0.723625	-1.19473	-1.19473	-1.19473	1.00059	-0.123987	-0.100767	-0.696627	0.00440976	1.41369	-0.313598	-0.586436	0.0305862	0.40763	-1.19473	1.5979	1.5658	0.391945	0.445741	-1.19473	1.02334	0.498309	-0.380537	0.779163	-1.19473	-1.19473	-1.19473	-0.0707675	-0.356311	0.454838	0.53584	-1.19473	-0.327114	-1.19473	-1.19473
RPL37--NM-000997--chr5---	-0.19064	-0.655964	0.495379	0.85109	-0.627394	0.0176925	-1.0763	0.521647	-0.826546	-0.40826	-0.310639	0.373799	-1.60189	-0.435516	-0.191706	-1.60189	-1.60189	1.66595	-1.60189	-0.673207	-0.0371174	-0.595305	0.0837915	0.252838	0.0452567	-0.188868	-0.732054	-0.441318	-1.02531	-1.60189	0.0991519	0.0694901	-0.179071	-1.60189	0.321894	-0.370197	-0.767776	0.89067	-1.60189	-1.60189	-0.0889206	-0.627049	0.393707	-0.17118	0.351215	-0.0265031	-0.849383	-0.238691	-0.25435
RPL37A--NM-000998--chr2--+	-0.405998	-1.63055	-1.63055	0.392829	-0.90767	0.660119	-1.1072	0.483966	-0.0451543	-0.899008	-0.103151	0.336745	-1.63055	-1.63055	-0.543893	-1.63055	-1.63055	-1.63055	0.265408	0.185063	0.148578	-0.628246	-0.232274	0.216298	-0.138896	-0.223534	0.197904	0.112707	0.0710335	-0.269137	0.0632633	0.470399	0.430266	-0.0206816	0.28506	0.0296055	-0.578794	0.809472	0.995713	-0.752903	-0.661312	-1.21698	-0.906461	-0.205921	0.903972	-1.63055	-0.627812	-1.63055	-1.63055
RPL38--NM-000999--chr17--+	-0.329596	-0.936657	-0.936657	0.67495	-0.360846	1.30968	-0.936657	1.09985	-0.316587	0.082314	0.435851	-0.936657	2	0.681085	-0.0190967	1.69001	-0.936657	-0.936657	-0.936657	-0.936657	-0.936657	-0.337455	-0.936657	-0.936657	-0.0870363	-0.2049	-0.435146	-0.936657	-0.136959	-0.936657	1.42266	0.086035	1.03677	-0.936657	0.0174786	-0.936657	-0.936657	0.943201	-0.936657	-0.936657	0.0689868	0.0706388	-0.359765	-0.936657	-0.493864	-0.936657	-0.936657	-0.936657	-0.936657
RPL39--NM-001000--chrX---	-0.827892	-1.32098	0.308184	0.246433	-0.853275	-1.32098	-1.32098	1.55254	-1.32098	0.40072	-1.32098	0.904805	0.579343	-1.32098	-0.0915418	-1.32098	-1.32098	-1.32098	-1.32098	0.0526198	0.246388	-0.834276	0.480149	-1.32098	-0.307722	-1.32098	-0.341038	0.244709	-0.22914	0.219315	-1.32098	0.0279246	-0.0792733	-1.32098	0.606173	-1.32098	-0.52542	0.563372	-1.32098	0.247603	-1.32098	-1.32098	-0.852398	0.290837	0.369984	1.21286	-0.47322	-1.32098	-1.32098
RPL4--NM-000968--chr15---	0.131492	-0.461015	0.687985	0.319233	-0.649887	1.79666	-1.18863	0.974796	-0.608478	0.360342	0.0955242	0.555949	-1.18863	-1.18863	0.227545	-1.18863	-1.18863	2	-1.18863	-1.18863	0.206413	-0.212568	0.334392	-1.18863	-0.393704	0.344676	-0.719404	-1.18863	-0.440412	-1.18863	1.01881	0.365157	-1.18863	-1.18863	0.275801	-0.466992	-0.457298	1.08258	-1.18863	-1.18863	0.953866	-0.649654	-0.244968	-0.00717264	0.266781	-1.18863	-1.18863	-1.18863	0.560072
RPL41--NM-021104--chr12--+	0.647906	-0.061355	-0.932351	0.872641	0.195379	1.58353	-0.115892	-0.0686008	-0.932351	0.208891	-0.0149164	0.380929	-0.932351	-0.932351	0.0953117	-0.932351	1.99779	-0.932351	-0.932351	0.510277	-0.534284	0.631292	0.890787	1.00133	0.254812	-0.112787	-0.370661	0.433814	-0.932351	1.19152	2	-0.932351	-0.932351	-0.932351	0.820651	0.526549	-0.056906	1.25165	-0.932351	-0.932351	-0.288353	-0.287166	0.905747	1.29014	1.9801	-0.932351	-0.932351	-0.932351	-0.932351
RPL5--NM-000969--chr1--+	0.0865631	-0.751872	0.511389	0.294993	-0.993208	1.8505	-0.243682	-0.178718	-1.29922	-0.983664	-1.78974	0.625786	-1.78974	0.139051	0.035822	-1.78974	-0.395657	0.944301	-1.78974	-0.77079	-0.610236	-0.0826446	0.456759	-0.423949	0.092518	-0.0252936	-1.08593	-0.516361	-0.726379	-1.78974	0.0766469	-1.32621	-0.228621	-1.78974	-0.551568	-0.759297	-0.424064	0.522352	0.629888	-0.822673	-0.994207	-0.9929	-0.125996	0.181459	-0.268067	-1.78974	-0.684837	-1.78974	-1.78974
RPL6--NM-000970--chr12---	-0.115082	-1.00704	1.05044	-0.376517	-1.15967	0.103393	-1.59503	-0.303486	-0.284647	-1.59503	-0.240923	-0.708462	-1.59503	0.248462	-0.450611	-1.59503	-0.262598	-1.59503	1.1571	-0.621141	-0.347538	-0.128718	0.257923	-1.59503	-0.20178	-1.04176	-0.0129738	-0.67276	-0.99039	-0.161251	0.915795	-0.821788	0.164204	-1.59503	0.198855	-1.01187	-0.487367	1.10298	0.717591	-1.59503	-0.834678	-0.572736	-0.354168	-0.0946749	-0.0210005	-1.59503	-1.59503	-1.59503	-0.181894
RPL7--NM-000971--chr8---	0.277585	-1.18534	-1.18534	0.469722	-0.691481	-1.18534	-0.560108	0.561326	0.0457439	-0.311394	-0.00817349	0.413891	0.821248	-1.18534	-0.398371	-1.18534	-1.18534	-1.18534	-1.18534	-0.532287	-0.412022	0.0120753	0.354301	0.295448	-0.276228	-0.118263	0.277542	-0.139151	-0.499459	-1.18534	-1.18534	0.802907	1.06173	-1.18534	1.10316	-0.523824	-0.926687	1.53956	0.64401	-0.570206	0.218744	-0.321407	-0.690554	-0.102314	0.464454	0.688714	-0.671145	-1.18534	-1.18534
RPL7A--NM-000972--chr9--+	-0.272181	-0.861215	0.226168	0.380048	-1.06895	0.831435	-0.910213	-0.0182005	-1.02232	-1.75459	-0.535074	0.923151	-1.75459	-0.653013	0.0157359	-1.75459	0.0268768	-1.75459	-1.75459	-1.23611	-0.85848	-0.604491	-0.0137707	1.09758	-0.68511	-0.907405	-0.750883	-0.658494	-1.21005	-1.75459	-1.75459	-0.821039	-1.12252	-1.00736	0.744873	-0.591323	-0.499235	1.15137	-0.302214	-0.92216	-0.325672	-0.638285	-0.832824	0.208906	0.456278	-1.75459	-1.34635	-1.75459	-1.75459
RPL8--NM-000973--chr8---	0.382111	-1.62228	0.837264	0.230221	-1.62228	-0.0432234	-0.750608	0.566362	-1.18641	-1.62228	-0.65748	0.303974	-1.62228	-1.62228	-7.90843e-05	-1.62228	-0.383493	-1.62228	0.936427	-0.716838	-0.462463	-1.62228	0.694902	0.583451	-0.518227	-0.0543867	-0.774213	-0.764829	-1.06014	0.330775	1.46148	-0.903383	0.549335	-0.850895	0.957987	-0.706625	-0.408735	1.07834	0.949195	-0.762941	-0.147169	-1.21734	0.112097	0.129334	0.124278	0.570576	-0.64046	-1.62228	0.307704
RPL9--NM-000661--chr4---	0.156593	-1.47365	0.196861	0.550699	-0.347935	1.18377	-0.866498	-0.0509434	-0.278171	-1.47365	0.0179736	0.808621	0.474901	-1.47365	0.448373	0.714016	-0.00590332	-1.47365	0.725864	-0.400857	-0.23182	-1.47365	-0.272215	-0.0356898	-0.165539	-0.437435	0.269071	-0.132985	-1.47365	0.105736	-1.47365	-0.621879	0.917115	-1.47365	0.205121	-0.0508268	-0.657897	0.992847	1.07383	-1.47365	-0.636078	-0.993863	-0.993172	-0.421947	0.492342	-1.47365	-0.604372	-1.47365	0.813041
RPLP0--NM-001002--chr12---	0.418911	0.0452454	0.279025	1.07782	-0.888725	-1.35896	-0.763635	1.04634	0.0563934	-1.35896	-1.35896	-0.401373	0.551653	-1.35896	-0.609634	-1.35896	0.0802078	-1.35896	0.79773	-0.737145	-0.141311	0.0203669	-0.35044	0.741866	0.0391603	0.241549	0.484677	-0.0443996	-0.26121	-1.35896	-1.35896	0.199797	0.985259	-1.35896	-0.0807458	-0.295193	-0.414175	1.28974	0.382892	-0.77325	-0.0220344	0.356908	-0.0186971	-1.35896	0.670114	-1.35896	-0.506611	-1.35896	-1.35896
RPLP1--NM-001003--chr15--+	-0.0472263	-0.949621	-0.420484	0.0932309	-0.835887	0.203556	-0.694895	0.5874	-0.433898	-0.823585	-0.139957	0.593949	0.270518	-2	0.590511	-2	-0.0011223	-2	0.650537	-1.4435	-0.158678	-0.137914	0.145594	-0.0301811	-0.538591	-0.321987	-0.755832	-0.40904	-0.803861	-0.253803	0.0820248	-0.122001	0.113794	-0.919436	0.294014	-0.95735	-0.944832	0.622891	0.120713	-0.710942	-0.762139	-0.625632	-0.505783	0.493508	0.082854	-2	-0.880684	-1.33052	-0.51932
RPLP2--NM-001004--chr11--+	-0.602064	-1.48925	0.339816	0.0390609	-0.458775	-0.0767841	-1.03088	0.564862	-0.586708	0.262904	-0.363129	-0.00698797	-0.0181638	-1.48925	0.145499	-1.48925	-0.381155	-1.48925	-1.48925	-0.679332	-0.197615	-0.0103552	-0.360496	-0.403643	-0.501675	-0.706947	-0.41677	-0.477097	-0.384108	-1.48925	-0.00574174	-0.0316104	0.575342	-0.799246	0.188516	-0.415071	-1.29963	0.590263	-1.48925	-1.03828	-0.856916	-0.639076	-0.166813	-0.695254	0.145855	-1.48925	-0.832979	-1.48925	-1.48925
RPS10--NM-001014--chr6---	-0.658156	-0.43481	0.124758	0.902959	0.0310201	-1.76804	-0.0345798	0.0271964	-0.203475	-1.105	-0.200458	0.790789	-1.76804	-0.71538	0.0862137	-1.76804	0.304468	-1.76804	-0.0496245	0.243091	0.0144375	-0.237614	0.460715	0.550427	-0.34676	-0.31669	0.255696	-1.30252	-0.893367	0.925848	0.392804	0.291694	-0.0632474	-1.76804	0.275659	-0.442789	-0.497013	1.07692	-0.38016	-0.336656	-0.702797	-0.541075	-0.539809	0.108262	0.393688	-1.76804	-0.363359	-1.76804	0.676585
RPS11--NM-001015--chr19--+	-0.145286	-0.604232	-1.53719	0.692028	-0.576053	0.0601908	-1.0188	1.06456	-0.516489	-0.812594	-0.561192	0.986015	0.126485	-1.53719	0.311574	-1.53719	-0.284026	-1.53719	0.340758	-0.102433	0.00613219	-1.11109	0.125384	-1.53719	-0.226826	-0.143538	-0.179095	-0.166476	-0.581316	-1.53719	0.140534	0.234501	-0.450112	-1.53719	0.360222	-0.988721	-0.148165	0.814563	-1.53719	-1.02718	-0.577156	-0.820896	-0.574583	0.234751	0.825226	-1.53719	-0.335649	-1.53719	-1.53719
RPS12--NM-001016--chr6--+	-0.435451	-1.14062	-0.272212	1.12533	-1.10975	-0.0932207	-0.895469	0.946982	-0.071415	-0.879391	-0.437629	0.649988	-0.392439	-2	-0.128546	-2	0.446766	-0.297828	-0.187725	1.11553e-05	-0.235681	-0.59273	0.574245	-0.0295886	-0.190941	0.0108761	-0.0473549	-0.491818	-0.677964	-0.35574	0.474007	0.194555	0.399958	-1.71053	0.88129	-0.411114	-0.970126	0.957022	-0.176847	-1.21116	-0.560052	-0.631985	-0.102803	-0.288404	0.329611	-1.0591	-1.20581	-2	-0.376816
RPS13--NM-001017--chr11---	0.074147	-0.733439	0.0251927	0.257897	-0.627837	1.10488	-0.788026	0.503465	-0.562799	-0.774207	-0.139214	0.78275	0.273479	-0.798319	-0.358244	-1.83014	-1.83014	0.374236	0.491492	-1.34449	-0.376468	-0.218763	-0.0758565	0.17122	-0.312531	-1.0366	-0.047704	-0.281401	-0.972784	-0.0580445	0.287934	0.115237	1.11735	-1.83014	0.409504	-0.999325	-0.809239	0.925666	1.01151	-1.83014	-0.0681456	-0.967758	-0.256461	-1.83014	-0.0372213	-1.83014	-1.16445	-1.83014	-1.83014
RPS14--NM-005617--chr5---	-0.190261	-1.22798	0.323143	0.436094	-0.516474	0.298066	-0.354572	0.708743	-0.295577	-0.986271	-1.18481	0.207798	0.368353	-1.28942	0.0724119	-0.680041	-1.20212	-2	0.808881	-0.739044	-0.178907	-0.476453	0.299619	0.263368	-0.458218	-0.442097	-0.131924	-0.676296	-0.346507	-1.12116	0.931057	0.12359	0.667748	-2	0.195064	-0.869831	-0.626758	0.856389	0.601358	-0.93788	-0.308977	0.14649	0.0176285	-0.0288938	0.519038	-0.382363	-1.09473	-1.12454	0.385359
RPS15--NM-001018--chr19--+	-0.237502	-1.23415	0.74154	0.737552	-0.695773	-1.72034	-0.498493	0.121014	0.0843399	-1.0833	-0.862273	-0.987265	0.341603	-0.708957	-0.0949654	-1.72034	-0.618597	-1.72034	-1.72034	-0.287324	-0.513959	-0.847513	0.495956	0.507213	-0.176605	-0.94252	-0.214744	-0.713989	-0.413164	-0.534797	0.739644	-0.863225	0.540605	-1.72034	-0.0521954	-0.652319	-0.499152	0.878084	1.06501	-1.27195	-0.696868	-0.541487	-0.405486	0.0823875	0.526875	-0.354296	-0.663983	-1.72034	0.628424
RPS15A--NM-001019--chr16---	-0.779446	-0.779446	-0.779446	-0.00340837	0.311154	1.6536	-0.779446	1.72502	-0.779446	-0.779446	-0.779446	-0.779446	-0.779446	0.972762	0.859976	-0.779446	1.12931	-0.779446	-0.779446	0.615684	-0.394485	-0.130439	0.558147	1.09057	0.140795	0.0131344	-0.236249	-0.779446	-0.779446	-0.779446	-0.779446	0.705493	0.225947	-0.779446	0.253997	-0.779446	-0.452804	0.117808	2	-0.779446	-0.779446	0.311576	-0.779446	-0.779446	0.0815472	-0.779446	-0.779446	-0.779446	-0.779446
RPS15A--NM-001030009--chr16---	-0.0470211	-1.06002	0.529334	0.40884	-1.5056	0.0770853	-0.507629	0.61083	-0.985338	-0.571168	-0.395986	0.293534	0.513073	-0.0430667	0.321122	-1.85412	-1.85412	-1.85412	-1.85412	0.109129	-0.24618	-0.430547	0.763057	0.302472	-0.211527	0.0659498	0.189736	-0.149796	-0.146415	-0.706344	0.155855	0.0618041	0.578923	-1.85412	0.537172	-0.820122	-0.738268	0.525447	0.842495	-1.42001	-1.03698	-0.466458	-0.581152	-1.08982	0.589121	-0.531593	-1.00873	-1.85412	-0.19233
RPS16--NM-001020--chr19---	0.238479	-0.684626	0.496499	0.898698	-0.190166	-0.334907	-0.349315	0.814504	-0.675565	-0.176425	-0.914923	0.200853	-0.273026	-1.82594	-0.100259	-1.82594	0.288187	-1.82594	-1.82594	-1.32054	-0.385367	0.141275	-0.129022	-0.118424	0.0721248	0.068663	0.103148	-1.01629	-1.29513	-0.567236	-0.259913	0.53872	0.670892	-0.65568	0.610492	-0.291031	-0.602245	0.853861	0.204295	-1.34989	-0.0876114	-0.431312	-0.302737	-0.171968	0.473138	0.244677	-0.898851	-0.570942	-0.585359
RPS17--NM-001021-1--chr15---	0.488777	-1.09935	-1.09935	0.697357	-0.16184	0.992165	0.42192	1.05356	0.237095	-1.09935	-0.336663	0.636749	-1.09935	1.17081	1.04931	-1.09935	1.33655	-1.09935	-1.09935	0.779235	0.43687	0.706334	0.71408	1.29583	-0.112432	-0.418025	-0.632401	0.0363771	-0.354766	-1.09935	1.09736	0.879706	0.738067	-1.09935	0.357963	0.491247	0.127636	1.82698	2	-1.09935	0.653995	-0.56299	-0.562216	0.0763661	1.21403	-1.09935	-0.12757	-1.09935	-1.09935
RPS17--NR-111943-1--chr15---	-0.732786	0.262381	-0.732786	1.32953	0.00405874	2	0.200069	-0.732786	0.643348	0.571154	-0.732786	-0.732786	-0.732786	-0.732786	-0.732786	-0.732786	1.52233	2	-0.732786	-0.732786	0.0990398	0.033991	-0.220142	-0.732786	0.354443	-0.732786	-0.732786	-0.732786	-0.732786	-0.732786	-0.732786	0.575916	1.22346	0.671465	1.84656	0.254205	0.520576	1.2721	1.99663	-0.732786	0.00302206	0.997431	0.00544156	0.883103	0.658558	-0.732786	-0.732786	1.68672	-0.732786
RPS18--NM-022551-4--chr6--+	-0.127521	-2	0.0628111	0.168225	-0.651347	-1.08782	-0.655112	0.129605	-0.395127	-1.77968	-0.295782	0.433643	0.306556	-0.667406	0.188471	-2	-0.12496	-2	0.311565	-0.446497	-0.376124	-0.374929	0.444051	0.637832	-0.383788	-0.168265	-0.135928	-0.307321	-1.01804	-0.787917	0.320569	-0.123428	-0.0881362	-2	0.534774	-0.167962	-0.555667	0.679065	-0.629915	-2	-0.415941	-0.795161	-0.222319	-0.150083	0.518697	-0.25569	-1.40161	-2	-0.806417
RPS19--NM-001022--chr19--+	-0.596736	-0.586841	0.736903	0.568975	-0.645006	0.134885	-0.528252	0.295593	-0.245996	-2	-0.677358	-0.0110311	-0.718021	-2	0.178579	-0.550095	0.0263877	-2	0.41043	-1.09731	-0.129214	-0.710757	-0.198263	0.506382	-0.694731	-0.0739624	-0.677842	-1.668	-1.6187	-0.461356	0.688845	-0.374767	0.028847	-0.774857	0.599253	-0.363607	-0.943929	1.0041	0.519466	-1.14305	-0.470619	-0.983537	-0.856297	-0.0557334	0.356744	-0.261824	-0.95168	-0.980543	-0.480553
RPS2--NM-002952--chr16---	-0.067055	-0.239224	0.621502	0.423547	-0.505424	-1.48352	-0.301159	0.189764	-0.229346	-0.746139	0.259822	-0.134189	0.903203	-0.312836	0.186464	-1.48352	-1.48352	-1.48352	1.15055	-0.551407	0.00298738	0.2185	0.208392	-0.234124	0.0200375	-0.953983	0.0306737	-0.96581	-0.51078	0.527063	0.223809	0.194038	0.892563	-0.207666	0.447375	-0.247276	-0.529883	0.863543	-1.48352	-1.48352	0.173576	-1.48352	0.301944	-0.0475228	0.476805	0.0976895	0.0786557	-1.48352	-0.131001
RPS20--NM-001023--chr8---	0.268055	-0.674574	-1.29597	0.245941	-0.215981	0.498942	-0.713482	1.62751	0.0888578	-0.481772	-0.199282	0.587636	-1.29597	-1.29597	-0.562803	-1.29597	-1.29597	-1.29597	0.814204	-0.266753	0.0223935	-1.29597	0.746787	-1.29597	0.273518	-0.301845	0.739072	-1.29597	-0.221894	-1.29597	-1.29597	0.40243	0.563208	-1.29597	-0.0453232	0.331406	-0.6714	1.1302	0.408313	-1.29597	0.0121218	-0.215598	0.0153871	-0.286986	0.950151	-1.29597	0.0541517	0.214802	0.197448
RPS21--NM-001024--chr20--+	-0.415112	-1.22804	1.46711	-0.287217	-0.186915	-1.22804	-1.22804	0.736196	-0.399684	-1.22804	-1.22804	0.208243	-1.22804	-1.22804	-0.521256	-1.22804	0.129417	-1.22804	-1.22804	-0.641527	-0.954266	-0.152631	0.480024	0.101868	-0.758125	-0.269689	-0.841733	-0.676967	0.382532	0.912106	0.589311	-0.440275	-0.513031	-1.22804	0.599536	-0.633926	-0.625945	0.558947	1.12801	-0.675582	-1.22804	-0.784308	-0.451137	-1.22804	-0.0298244	-1.22804	-0.766237	-1.22804	-1.22804
RPS23--NM-001025--chr5---	0.183713	-1.43366	0.133338	0.281044	-0.848833	0.049725	-0.749624	0.723004	-0.581263	-1.22864	-0.946988	0.613416	-2	-0.431011	-0.51606	-0.649125	-0.3159	-2	-0.640637	-0.372189	-0.446527	-0.447979	0.682978	0.28297	-0.597101	-0.323528	-0.548915	-0.767564	-0.142944	-1.08496	-0.234888	-0.090661	0.489329	-2	0.411083	-0.458861	-0.774309	0.725897	-0.0335987	-0.533696	-0.346824	-0.487092	-0.161363	-0.49584	0.425637	-0.355017	-0.373314	-2	-2
RPS24--NM-001026--chr10--+	-0.96498	-1.15606	0.310498	-0.36331	-0.245796	-0.145424	-0.566878	0.33557	-0.951197	-1.69121	-0.746738	0.410009	0.578373	-1.69121	-0.103189	-1.69121	-0.478524	-1.69121	-1.69121	-0.804845	-0.122851	-0.528947	0.481364	0.468046	-0.71641	-0.835066	-0.861011	-0.583521	-1.69121	0.620539	-1.69121	0.0232565	-0.0900778	-1.69121	0.144917	-0.0999373	-0.683092	0.64757	-0.223473	-1.69121	-0.99919	-0.563099	-0.561864	-0.325691	-0.258638	-0.187606	-1.69121	-1.69121	-0.405072
RPS24--NM-033022--chr10--+	-0.138545	-1.45336	0.500598	0.316849	-0.777	-1.45336	-0.620408	0.0998434	-0.48919	-0.768896	-0.903126	-0.200862	-1.45336	-0.366688	0.854463	-1.45336	-1.45336	-1.45336	0.320581	0.0863345	0.146353	-1.45336	0.888368	0.654388	-0.057703	0.0448848	-0.463235	-0.633997	-1.45336	-1.45336	1.18976	-0.171236	-1.45336	-1.45336	0.140363	-0.0852885	-0.676246	0.177224	-1.45336	-0.971595	-0.546498	-0.0420082	-0.544066	0.48357	0.0424119	-1.45336	-1.05065	-0.183313	-0.197902
RPS25--NM-001028--chr11---	-0.451556	-0.710541	0.339925	0.579926	-0.065867	0.525296	-0.757874	0.241296	-0.629373	-1.57358	-0.670726	-0.0228892	-1.57358	-1.57358	0.571907	-1.57358	-1.57358	-1.57358	0.163634	-0.246345	-0.145915	-0.462532	0.719667	0.118636	-0.28149	0.183003	-0.451589	0.158356	-0.41742	-1.57358	1.01482	-0.318001	0.458605	-1.57358	0.18164	-0.233833	-0.812555	0.825713	0.832792	-0.769416	-0.685494	-1.57358	-0.493998	0.0655711	0.399026	-0.136231	-1.17921	-1.57358	-1.57358
RPS27--NM-001030--chr1--+	-0.420246	-1.45047	0.0140418	-0.273733	-0.463575	-1.45047	-0.257471	0.411457	-0.665263	-1.45047	-1.45047	0.779082	0.257796	0.329821	-0.345286	-1.45047	-1.45047	-1.45047	-1.45047	-0.894509	-0.361778	-0.431077	0.073978	0.427865	0.144387	-0.91617	-0.205077	-0.55982	-0.468979	-0.0658463	-1.45047	-0.449428	0.645481	-0.649219	0.0212832	-0.887304	-0.879739	0.79305	0.106908	-1.45047	-0.716187	-0.463225	-1.02925	-0.52846	0.0695961	1.26761	-1.01272	-1.45047	0.55424
RPS27A--NM-001177413--chr2--+	-1.04987	-0.428113	-1.04987	0.492944	-0.244843	-1.04987	-0.0584614	0.578336	-0.554123	-1.04987	-1.04987	-0.112388	-1.04987	-1.04987	0.513889	-1.04987	0.359083	-1.04987	-1.04987	-0.0200525	-0.15345	-0.570807	0.619354	1.00685	-0.202417	-1.04987	-0.648911	-0.0746357	-1.04987	-1.04987	-1.04987	0.476161	0.810397	-1.04987	0.561655	-0.433221	-0.603557	0.664945	-1.04987	-0.476457	-1.04987	-0.589308	-0.588644	-1.04987	0.0192547	-1.04987	-1.04987	-1.04987	-1.04987
RPS27A--NM-002954--chr2--+	-0.318539	-1.05814	0.723941	0.454584	-0.367964	-0.498559	-0.51156	0.538526	-1.47253	-1.23363	-0.771293	0.402598	-0.442726	-1.84389	-0.6725	-0.270783	-1.84389	-1.84389	-1.84389	-0.329288	0.125541	-0.682415	0.279239	0.0353545	-0.740288	-0.670142	-0.590734	-0.689461	-1.36495	-0.17992	0.512682	-0.455533	0.489143	-1.84389	0.354451	-0.820766	-0.809968	1.01727	-0.0120508	-1.41435	0.215288	-0.367562	-1.03317	-0.116945	0.189008	-0.535271	-0.551024	-1.84389	-0.199576
RPS27L--NM-015920--chr15---	0.205972	0.466591	-0.865817	1.09393	-0.865817	-0.865817	-0.865817	0.456939	0.226313	-0.865817	-0.0339221	0.325016	-0.865817	-0.865817	1.12054	1.80174	-0.865817	-0.865817	-0.865817	0.442304	1.33829	1.10372	0.599165	0.887576	-0.246267	0.397702	-0.356498	0.37297	-0.0536685	1.06003	1.53024	1.07261	0.686699	-0.865817	1.18121	-0.865817	-0.298887	1.43292	-0.865817	-0.865817	0.155483	-0.865817	0.158475	-0.865817	0.238384	-0.865817	-0.865817	-0.865817	1.0323
RPS28--NM-001031--chr19--+	0.190103	-1.08058	0.725754	1.10836	-1.08058	-1.08058	-0.424067	-1.08058	-0.112101	-0.162909	-1.08058	-1.08058	-1.08058	-1.08058	-1.08058	-1.08058	-1.08058	-1.08058	-1.08058	0.0794357	0.104592	0.440512	-0.427141	-1.08058	0.0428684	0.684426	0.639395	-0.436289	0.502273	-1.08058	-1.08058	0.415016	1.01487	-1.08058	-1.08058	-1.08058	-0.808987	0.612396	0.840296	-1.08058	-0.562743	-0.561788	0.813496	0.70652	0.494851	-1.08058	-0.54066	-1.08058	-1.08058
RPS29--NM-001032--chr14---	0.87934	-0.870337	-0.870337	0.382559	0.162539	-0.870337	-0.870337	-0.0792374	-0.870337	-0.870337	-0.0300684	-0.870337	-0.870337	-0.870337	0.682312	-0.870337	0.937391	-0.870337	-0.870337	0.864373	-0.505752	-0.255681	0.396459	-0.870337	-0.24455	-0.870337	-0.870337	-0.870337	-0.870337	-0.870337	-0.870337	-0.269266	1.15399	-0.870337	0.108407	0.465854	-0.0685263	-0.160994	-0.870337	-0.870337	-0.280506	-0.870337	-0.278567	0.424976	-0.0549152	-0.870337	-0.870337	-0.870337	1.04688
RPS3--NM-001005--chr11--+	-0.724114	-0.610136	1.20774	-0.313716	-0.744991	-1.12965	-0.642665	0.0114864	-1.12965	-1.12965	-1.12965	-1.12965	-1.12965	-1.12965	-0.516689	-1.12965	-1.12965	-1.12965	-1.12965	-1.12965	-0.380639	-0.196996	0.0695608	0.0237211	-0.562076	-1.12965	-0.144958	-1.12965	-1.12965	0.137158	-1.12965	-1.12965	-1.12965	-1.12965	-0.0840501	-1.12965	-0.928191	0.559633	-1.12965	-1.12965	-1.12965	-0.744824	-0.455878	-0.286093	0.0389697	-1.12965	-0.729151	-1.12965	0.118919
RPS3--NM-001256802--chr11--+	-0.746026	-0.314639	0.841238	-0.384701	-1.05753	0.641026	-1.43156	0.0704347	-0.499179	-0.35616	-0.899467	0.34844	0.0881622	-1.43156	-0.448357	-1.43156	-1.43156	-1.43156	-1.43156	-0.333068	-0.703246	-0.753912	0.087156	0.239459	-0.74303	-0.367036	-0.474079	-0.639212	-0.912097	-1.43156	0.100995	-0.767246	0.433057	-1.43156	0.301675	-0.585427	-0.795337	0.632186	-1.43156	-0.965679	-1.05805	-1.05737	-1.05683	-0.611313	0.0148966	0.594799	-1.43156	-1.43156	-1.43156
RPS3--NM-001260507--chr11--+	-0.68966	0.904852	-0.68966	0.181116	0.953013	-0.68966	0.196309	0.247626	-0.68966	0.548742	-0.68966	-0.68966	-0.68966	-0.68966	0.425493	-0.68966	-0.68966	-0.68966	-0.68966	0.235731	-0.68966	0.0385778	-0.202782	-0.68966	-0.68966	0.199678	-0.68966	-0.68966	-0.68966	-0.68966	-0.68966	0.0224822	-0.68966	-0.68966	-0.68966	0.247724	0.260317	0.994724	-0.68966	0.182	-0.68966	-0.68966	-0.68966	-0.68966	0.276443	-0.68966	-0.68966	-0.68966	-0.68966
RPS3A--NM-001006--chr4--+	-0.100341	-1.40942	0.973513	-0.627289	-0.657618	1.18675	-1.09552	0.695432	-0.760756	-1.2456	-1.00558	-0.336962	-1.93739	-0.839085	0.276912	-1.93739	-1.93739	-1.93739	-1.93739	-0.0790695	-0.542787	-1.22914	-0.273565	-0.765239	0.0504998	-0.824787	0.0357311	-0.28886	-1.02479	-0.0511112	-1.93739	-0.64154	-0.15867	-1.93739	0.327486	-1.93739	-0.475073	0.701705	-0.489326	-1.45047	-0.658907	-1.5463	0.0318464	-1.93739	-0.0289464	-1.93739	-0.98914	-1.93739	-0.073393
RPS4X--NM-001007--chrX---	0.267921	-2	-0.590634	0.20358	-0.523991	0.242838	-1.12922	-0.568983	-0.782386	-1.2847	-0.306922	-0.0739839	-0.355821	-2	0.292678	-2	-0.761875	0.42955	0.558859	-1.09543	-0.132831	-0.637327	0.317185	0.205665	-0.797229	-0.432566	-0.119767	-0.645602	-0.765179	-2	0.334377	0.22508	0.308094	-2	0.0528927	-0.799814	-0.970976	0.838326	-2	-0.29067	-0.15934	-0.675119	-0.26598	0.440618	-0.253791	0.192782	-0.346516	-2	0.336784
RPS4Y1--NM-001008--chrY--+	-0.86992	-0.86992	-0.86992	-0.18615	-0.86992	-0.86992	-0.86992	-0.86992	-0.86992	-0.86992	-0.0881789	0.249119	-0.86992	-0.86992	0.00574588	-0.86992	-0.86992	-0.86992	-0.86992	-0.86992	-0.00944378	0.125666	-0.177478	-0.86992	-0.287722	-0.86992	-0.86992	-0.187172	-0.106735	-0.86992	-0.86992	0.106077	0.0159365	-0.86992	0.623804	-0.133847	-0.337169	1.34406	-0.86992	-0.86992	-0.321173	-0.86992	-0.319368	1.02385	-0.86992	-0.86992	0.463029	-0.86992	0.91376
RPS5--NM-001009--chr19--+	-0.19464	-1.01045	0.46336	-0.213779	0.0367649	0.00518426	-1.54824	0.604875	-0.555629	-1.54824	-0.981776	0.74666	0.0696547	-1.54824	-0.195662	-1.54824	0.260965	-1.54824	-1.54824	0.200639	-0.638179	-0.582776	0.3538	1.15153	-0.111412	0.298394	-1.20143	-0.435079	-0.33281	-1.54824	0.0833165	-0.399812	0.722391	-1.54824	0.471487	-0.647449	-0.748203	1.07631	1.28864	-1.54824	-0.41614	-0.85166	0.266428	-0.675007	0.462352	-0.0372063	-1.13365	-1.54824	-1.54824
RPS6--NM-001010--chr9---	-0.191039	-1.15276	-0.674104	0.000763664	-0.75738	-0.508095	-0.523072	-0.462602	-0.862196	-0.595501	-0.822297	0.390198	-0.443772	0.00649721	-0.0918366	-2	-0.252899	-2	-2	-1.16926	-0.726596	-0.569073	0.427258	-2	-0.295341	-0.215556	-0.396377	-0.241408	-1.13053	0.559347	0.656901	-0.458527	-0.0774361	-1.30084	0.364762	-1.15924	-0.785983	0.769343	0.0523853	-1.21451	-0.61012	-1.12509	-0.606883	-1.18673	0.505978	0.0943612	-0.434645	-2	-0.163653
RPS7--NM-001011--chr2--+	-0.687831	-1.70017	-0.261086	0.648684	-0.347685	0.589099	-0.527883	0.533738	-0.115741	-1.70017	-0.173702	0.490668	-0.0215642	-1.70017	-0.296836	-1.70017	-1.70017	-1.70017	0.194631	-0.0555743	-0.411959	0.112485	0.616008	0.551181	-0.471823	0.0679747	-0.476399	-0.317155	-0.43913	-0.339586	-0.00738983	-0.0369076	0.894597	-1.70017	0.693385	-0.765574	-1.13934	0.970951	1.70661	-0.823056	-0.349047	-1.28685	-0.191183	-0.794167	0.735259	-0.132435	-0.95132	-1.70017	0.269731
RPS8--NM-001012--chr1--+	-0.658977	-1.02281	-0.122577	0.222987	-0.838556	0.631248	-0.660664	0.300148	0.0114196	-1.188	-0.404334	0.108368	-1.76243	-1.76243	0.0762283	-1.76243	0.466866	-1.76243	0.289565	-0.470247	-0.173639	-0.0916554	0.654178	-0.31222	-0.0746357	-0.257057	-0.124037	-0.675775	-0.58372	-1.76243	-1.76243	0.294652	-0.900633	-1.76243	0.217099	-0.324791	-1.01953	1.14028	-1.76243	-1.76243	-0.0608969	-1.00021	-0.999309	0.326078	0.190199	-1.76243	-1.42446	-0.696548	-0.708792
RPS9--NM-001013-5--chr19--+	0.405779	-0.52722	1.26775	0.411505	-0.551256	-2	-0.284324	0.790663	-0.770112	-1.46472	-0.467245	0.851211	0.170711	-2	0.486879	-2	0.396098	-2	0.415977	-0.748124	-0.0675099	-0.804306	0.642321	-0.349999	-0.628579	0.0803886	0.102902	-0.453536	-1.62206	-0.835181	0.186973	0.0754739	0.992225	-0.586855	0.639032	-0.0823401	-0.72022	1.23212	1.001	-2	0.129709	-0.842859	0.133762	-0.407882	0.628588	0.0425254	-0.983454	-2	0.189428
RPSA--NM-002295--chr3--+	-1.21735	-0.12555	0.451771	0.611967	0.146447	1.43786	-1.21735	-0.13346	0.224908	-0.369388	-1.21735	-1.21735	-1.21735	-1.21735	0.042241	-1.21735	-1.21735	-1.21735	-1.21735	-0.583715	-0.122207	-1.21735	-0.386034	-1.21735	-0.510318	-1.21735	0.00928775	-0.622002	-0.0987326	-1.21735	0.746021	-1.21735	-0.444894	-1.21735	0.0851617	-0.575503	-1.21735	0.666279	1.82686	-0.200031	-0.380479	-0.379104	-1.21735	-0.166524	-0.312549	-1.21735	-0.348799	0.356076	-1.21735
RSRC2--NM-023012--chr12---	-0.460009	-0.460009	-0.460009	-0.460009	-0.460009	-0.460009	-0.460009	-0.460009	-0.460009	-0.460009	-0.460009	-0.460009	-0.460009	-0.460009	-0.460009	-0.460009	-0.460009	-0.460009	-0.460009	-0.460009	-0.460009	0.476796	-0.460009	-0.460009	-0.460009	0.684035	0.324064	-0.460009	-0.460009	-0.460009	-0.460009	-0.460009	-0.460009	-0.460009	-0.460009	-0.460009	0.76204	1.39103	2	-0.460009	-0.460009	-0.460009	-0.460009	-0.460009	-0.460009	-0.460009	-0.460009	-0.460009	-0.460009
S100A10--NM-002966--chr1---	-0.958636	-0.958636	-0.958636	-0.33119	-0.0768583	1.00855	-0.958636	0.181982	-0.415623	-0.0662929	-0.958636	-0.958636	-0.958636	-0.958636	-0.958636	-0.958636	-0.958636	-0.958636	-0.958636	-0.958636	0.0232477	-0.433897	-0.958636	-0.958636	-0.66805	-0.317815	-0.179503	-0.958636	-0.258317	-0.958636	-0.958636	-0.0630343	1.55516	-0.958636	-0.123071	-0.283195	0.195409	0.486747	-0.958636	-0.958636	-0.0779639	0.225427	-0.0753839	-0.958636	0.212417	0.954867	-0.0446262	-0.958636	-0.958636
S100A11--NM-005620--chr1---	-0.841097	-0.841097	-0.841097	-0.841097	-0.841097	-0.841097	-0.841097	-0.841097	-0.841097	-0.841097	-0.841097	0.0398078	-0.841097	-0.841097	-0.841097	-0.841097	-0.841097	-0.841097	-0.841097	-0.269074	-0.841097	-0.841097	-0.841097	-0.841097	-0.841097	-0.841097	-0.464334	-0.841097	-0.841097	0.583523	-0.841097	-0.841097	-0.143753	-0.841097	-0.841097	-0.841097	-0.841097	0.458859	-0.841097	-0.841097	-0.409124	-0.841097	-0.841097	0.107547	-0.841097	-0.841097	-0.841097	-0.841097	-0.841097
S100A13--NM-001024211--chr1---	-0.422518	-0.422518	2	-0.422518	-0.422518	-0.422518	-0.422518	-0.422518	0.610125	-0.422518	-0.422518	-0.422518	-0.422518	-0.422518	-0.422518	-0.422518	-0.422518	-0.422518	-0.422518	-0.422518	0.660028	-0.422518	0.244642	-0.422518	-0.422518	-0.422518	-0.422518	-0.422518	0.909272	-0.422518	2	-0.422518	1.12334	-0.422518	-0.422518	-0.422518	0.0797149	0.481488	2	-0.422518	-0.422518	-0.422518	-0.422518	-0.422518	0.314894	-0.422518	1.31564	-0.422518	-0.422518
S100A4--NM-002961--chr1---	-0.539027	-0.539027	-0.539027	-0.539027	-0.539027	-0.539027	-0.539027	-0.539027	-0.539027	-0.539027	-0.539027	-0.539027	-0.539027	-0.539027	-0.539027	-0.539027	-0.539027	-0.539027	-0.539027	-0.539027	-0.539027	-0.539027	-0.539027	-0.539027	-0.539027	-0.539027	-0.539027	-0.539027	-0.539027	-0.539027	-0.539027	-0.539027	-0.539027	-0.539027	-0.539027	-0.539027	-0.539027	-0.539027	-0.539027	-0.539027	-0.539027	-0.539027	-0.539027	-0.539027	-0.539027	-0.539027	-0.539027	-0.539027	-0.539027
S100A6--NM-014624--chr1---	-0.772349	-0.772349	-0.772349	-0.772349	-0.772349	-0.772349	-0.772349	-0.255482	-0.772349	-0.772349	-0.772349	-0.772349	0.795636	-0.772349	-0.772349	-0.772349	-0.772349	-0.772349	-0.772349	-0.772349	-0.534146	-0.772349	-0.772349	-0.772349	-0.772349	-0.772349	-0.772349	-0.772349	-0.772349	-0.772349	-0.772349	-0.772349	-0.772349	-0.772349	-0.772349	-0.772349	-0.772349	0.156506	-0.772349	-0.772349	-0.772349	-0.772349	-0.772349	-0.772349	-0.772349	-0.772349	-0.370548	-0.772349	-0.772349
SAA2--NM-030754--chr11---	1.26894	2	-0.532919	2	0.493879	1.17359	0.409111	1.7046	-0.0618614	2	0.0893709	0.35787	2	-0.532919	0.616949	-0.532919	1.45458	-0.532919	1.47333	-0.532919	2	-0.0777144	-0.228583	0.778687	0.112525	2	1.82979	1.95205	-0.532919	2	2	2	1.45742	-0.532919	-0.532919	0.0530181	1.42122	0.6573	-0.532919	2	0.4927	-0.095294	2	0.42637	0.482956	-0.532919	1.61758	0.903445	-0.532919
SAA4--NM-006512--chr11---	1.78825	1.57605	2	1.59508	0.523581	-0.781969	0.519636	0.578841	1.2738	0.0297785	0.912888	1.8617	1.84546	1.16039	-0.781969	-0.781969	1.75536	-0.781969	2	1.54659	2	0.762982	0.881257	2	1.65365	2	0.576799	1.31546	-0.781969	2	2	0.738578	2	-0.781969	1.34366	1.41605	1.3808	0.596511	1.65468	-0.210614	0.522186	1.52683	1.30849	0.798851	0.611615	1.70314	0.937754	-0.781969	2
SAP18--NM-005870--chr13--+	-0.812318	-0.812318	2	0.571725	0.328674	1.73315	1.03914	1.12335	-0.109676	0.342345	-0.812318	1.30059	-0.812318	-0.812318	-0.812318	-0.812318	-0.812318	-0.812318	-0.812318	-0.812318	0.678928	-0.812318	-0.812318	2	-0.121027	0.0168841	0.195855	-0.00163648	-0.812318	-0.812318	-0.812318	-0.14833	0.91997	-0.812318	-0.812318	-0.812318	-0.470583	0.863286	-0.812318	-0.812318	-0.812318	-0.812318	-0.812318	0.618582	-0.812318	2	-0.132961	-0.812318	-0.812318
SAT1--NM-002970--chrX--+	0.478848	-0.0731664	1.79732	0.183105	-0.0392732	-1.19531	-1.19531	-0.0812958	0.0323699	0.220685	-0.0213986	2	-1.19531	-1.19531	0.477583	-1.19531	0.311973	-1.19531	-1.19531	0.251091	0.340346	-0.682812	0.196963	-1.19531	-0.12835	-0.131184	-0.434351	-0.583416	0.307956	-1.19531	-1.19531	0.225087	1.61305	-1.19531	1.08687	-0.0811949	-0.357586	0.585698	0.628983	-0.149718	-0.0406001	-0.702605	-0.33266	-0.115279	0.135156	0.673564	-0.682539	-1.19531	1.15298
SBDS--NM-016038--chr7---	-0.514555	-0.514555	-0.514555	0.616905	-0.514555	2	-0.514555	0.703327	-0.514555	1.09459	-0.514555	-0.514555	-0.514555	-0.514555	-0.514555	-0.514555	-0.514555	-0.514555	-0.514555	-0.514555	-0.514555	-0.514555	-0.514555	-0.514555	0.827153	-0.514555	-0.514555	-0.514555	0.748316	-0.514555	-0.514555	0.410781	-0.514555	-0.514555	-0.514555	0.703453	-0.0383121	0.793639	-0.514555	-0.514555	-0.514555	0.395152	0.396464	-0.514555	-0.514555	-0.514555	-0.514555	-0.514555	-0.514555
SEC61B--NM-006808--chr9--+	-0.00769472	0.634052	1.78342	0.837213	-0.471096	2	-0.32308	1.43663	-0.428328	-0.0428571	-1.02752	1.25045	-1.02752	-1.02752	1.93703	-1.02752	-1.02752	-1.02752	-1.02752	0.922191	0.413303	-0.0194264	1.34068	0.640862	-0.00323707	0.17474	0.99446	0.527976	-0.254747	-1.02752	1.25236	0.297304	1.95776	-1.02752	0.484969	-1.02752	-0.272187	1.21427	1.03358	-0.334457	0.277082	0.79461	0.28058	0.89004	1.12428	1.98696	0.322174	-1.02752	-1.02752
SEC61G--NM-014302--chr7---	-0.600834	0.548399	-0.600834	1.78076	0.250084	-0.600834	-0.600834	0.538838	0.315488	0.904974	0.609672	1.13197	-0.600834	-0.600834	0.755112	-0.600834	-0.600834	-0.600834	-0.600834	-0.600834	0.35977	0.284651	-0.600834	1.95056	-0.600834	0.480537	-0.600834	-0.600834	-0.600834	-0.600834	-0.600834	0.265079	-0.600834	-0.600834	1.71216	-0.600834	0.224117	0.810782	-0.600834	-0.600834	0.248887	0.250454	-0.600834	-0.600834	1.00591	2	0.285123	-0.600834	-0.600834
SEC62--NM-003262--chr3--+	0.620771	-0.712388	-0.712388	0.192695	-0.712388	-0.712388	0.208486	1.44546	-0.712388	-0.712388	1.0214	0.768845	-0.712388	-0.712388	1.19965	-0.712388	-0.712388	-0.712388	-0.712388	-0.712388	0.108755	0.0445412	1.34391	-0.712388	-0.293222	0.859257	-0.0788643	-0.712388	-0.712388	-0.712388	-0.712388	0.0278114	2	-0.712388	1.2648	0.933088	-0.00720404	0.494288	-0.712388	-0.712388	0.55797	0.0153092	0.997616	-0.712388	0.976841	-0.712388	0.0449448	-0.712388	-0.712388
SELK--NM-021237--chr3---	-0.585679	-0.585679	-0.585679	-0.585679	-0.585679	-0.585679	-0.585679	-0.585679	-0.585679	-0.585679	0.520226	-0.585679	-0.585679	-0.585679	2	-0.585679	-0.585679	-0.585679	-0.585679	-0.585679	-0.585679	-0.585679	-0.0448265	-0.585679	-0.137694	-0.585679	0.0914003	-0.585679	-0.585679	-0.585679	-0.585679	-0.585679	1.47821	-0.585679	-0.585679	-0.585679	-0.585679	0.347911	-0.585679	1.06477	0.190617	0.192048	0.19317	1.11913	-0.585679	-0.585679	-0.585679	-0.585679	-0.585679
SELM--NM-080430--chr22---	-0.452661	-0.452661	-0.452661	-0.452661	-0.452661	-0.452661	-0.452661	-0.452661	-0.452661	-0.452661	0.496842	-0.452661	-0.452661	-0.452661	0.610924	-0.452661	-0.452661	-0.452661	-0.452661	-0.452661	-0.452661	-0.452661	-0.452661	-0.452661	-0.452661	-0.452661	-0.452661	-0.452661	0.474304	-0.452661	-0.452661	-0.452661	-0.452661	-0.452661	0.65332	-0.452661	-0.452661	2	-0.452661	-0.452661	-0.452661	-0.452661	-0.452661	2	-0.452661	-0.452661	-0.452661	1.73897	-0.452661
SEPP1--NM-005410--chr5---	0.387631	0.0207536	1.50885	1.25394	0.325333	-1.20183	-0.0462994	1.5428	1.03878	1.11394	0.780724	1.6436	0.97832	0.30568	0.620799	-1.20183	1.23611	2	-1.20183	-0.0015321	0.187597	0.989892	0.613123	1.19537	1.25465	0.876645	0.577873	1.06091	0.43599	-1.20183	0.996729	0.576826	1.67697	-1.20183	1.5198	0.390103	1.32806	0.615309	-1.20183	0.301174	0.3237	0.0581265	-0.261967	0.647329	1.50749	0.834322	1.1532	-1.20183	1.35665
SEPW1--NM-003009--chr19--+	0.289182	-0.517402	2	0.434568	-0.517402	-0.517402	-0.517402	2	-0.517402	-0.517402	-0.517402	1.04056	-0.517402	-0.517402	-0.517402	-0.517402	-0.517402	-0.517402	-0.517402	-0.517402	-0.045168	-0.517402	0.0148744	-0.517402	-0.0765208	-0.517402	-0.517402	0.433145	-0.517402	-0.517402	2	-0.517402	-0.517402	-0.517402	-0.517402	-0.517402	-0.517402	0.401384	-0.517402	-0.517402	-0.517402	-0.517402	0.249097	-0.517402	0.538784	-0.517402	-0.517402	-0.517402	-0.517402
SERBP1--NM-015640--chr1---	-0.588245	-0.588245	-0.588245	1.2553	0.280872	-0.588245	-0.588245	0.575802	0.347675	-0.588245	0.648151	-0.588245	-0.588245	-0.588245	0.796701	-0.588245	-0.588245	-0.588245	-0.588245	-0.588245	1.3981	-0.588245	0.0164251	-0.588245	1.29465	-0.588245	0.168726	0.491584	0.618803	-0.588245	-0.588245	0.955385	-0.588245	1.06809	-0.588245	-0.588245	-0.588245	0.662122	-0.588245	0.494298	0.27965	1.45257	-0.588245	-0.588245	-0.588245	-0.588245	0.987112	-0.588245	-0.588245
SERF2--NM-001018108--chr15--+	0.945737	0.225651	1.79404	0.983615	0.576823	-1.63324	-0.327198	1.54657	0.288756	-0.309879	0.0673946	1.64139	1.00314	-1.63324	0.444949	0.466384	0.458028	-1.63324	0.477755	-0.0204356	0.347674	-0.0830226	1.41445	0.874986	0.26872	-0.323263	0.291801	0.471341	0.261335	-1.63324	0.252683	0.484188	2	-0.756066	1.30089	0.405249	0.481092	1.10708	0.811714	-1.05994	0.574999	-0.552448	0.579254	-0.0470313	0.83311	0.113371	-1.15401	-0.12188	2
SERF2--NM-001199878--chr15--+	0.984417	0.197579	1.72343	1.62897	0.910686	2	1.65964	0.18954	-0.768685	-0.768685	-0.768685	0.688239	-0.768685	-0.768685	0.371381	-0.768685	-0.768685	-0.768685	-0.768685	-0.768685	-0.327078	-0.768685	1.02365	1.3765	0.781285	0.777168	-0.145558	0.120214	-0.768685	-0.768685	-0.768685	0.934759	1.13074	-0.768685	0.416826	0.849787	0.668761	0.260598	-0.768685	0.122448	2	0.482878	1.57661	-0.768685	0.892821	-0.768685	-0.768685	-0.768685	-0.768685
SERPINA1--NM-000295-1--chr14---	1.80949	0.144209	1.23293	0.936751	0.0410702	1.07413	-0.16173	1.3416	1.30897	0.133284	0.102423	1.24693	1.83721	-0.0600276	0.945576	0.385208	0.0759002	1.02536	2	1.11527	1.31165	1.0309	0.852217	2	1.31656	1.14711	0.833478	0.533902	-0.0478988	1.6465	1.85525	0.964206	2	-0.926131	1.18678	-0.539011	1.42307	1.24418	2	0.230242	0.492201	0.693484	0.740397	0.715888	1.00514	1.92888	0.834306	-2	2
SERPINA1--NM-001002235--chr14---	2	1.08129	1.32398	1.02928	0.473743	0.954405	1.10596	1.20706	1.37702	-0.275704	0.773105	0.821919	2	1.03557	0.201564	0.906335	1.53466	-0.151733	2	1.37934	1.38616	1.18784	1.13855	2	1.84531	0.496623	1.46582	0.0959683	0.297486	1.12818	1.72426	1.33753	1.81657	-0.0489442	1.09876	0.251368	1.24224	0.889681	1.24051	0.0990557	1.09599	0.439014	1.63195	-0.526072	1.12522	1.99077	1.38335	-0.599198	1.63884
SERPINA11--NM-001080451--chr14---	2	1.04778	-0.666657	0.26961	0.0857859	-0.666657	1.88725	0.341123	0.738609	-0.666657	-0.666657	-0.666657	2	-0.666657	1.88923	-0.666657	2	-0.666657	-0.666657	1.01653	1.85492	0.116352	0.281485	-0.666657	2	0.959139	1.25951	1.43682	1.63007	-0.666657	2	0.0990456	1.331	-0.666657	-0.666657	0.341228	1.58928	1.38067	2	0.930824	1.09754	0.64963	1.10227	0.983439	1.6193	-0.666657	2	1.80407	1.77569
SERPINA3--NM-001085--chr14--+	2	1.34957	0.574555	1.0859	0.276571	0.76997	0.942083	0.00339271	1.17122	1.20873	0.400113	1.64079	2	0.925801	-0.309227	-1.05444	1.53238	1.75253	2	0.807188	1.29584	0.997427	0.267619	1.03486	2	1.39882	1.4715	0.917666	1.52736	2	2	0.294324	1.75403	-1.05444	1.11264	0.333022	1.44966	0.736549	1.91659	-1.05444	0.649873	1.5804	1.19354	0.557209	0.862694	1.96892	1.35335	-1.05444	0.46352
SERPINA6--NM-001756--chr14---	1.05396	-0.728131	-0.728131	0.814547	-0.000854943	-0.728131	1.33553	-0.728131	0.0550456	0.558876	1.00541	-0.728131	-0.728131	-0.728131	0.43079	-0.728131	-0.728131	2	-0.728131	0.898757	1.5396	1.03523	1.09384	2	0.610662	1.74724	1.13361	0.812528	0.969666	1.66701	2	1.00348	0.444277	-0.728131	0.476986	0.246043	1.12223	0.318174	-0.728131	-0.728131	1.33958	0.54413	0.545765	0.866775	0.960854	2	1.03599	-0.728131	1.63252
SERPINC1--NM-000488--chr1---	2	1.74274	-0.990965	0.497445	1.56251	-0.990965	1.79261	0.586653	1.79956	0.538025	-0.234441	-0.990965	2	1.26086	-0.143546	-0.990965	-0.990965	-0.990965	2	1.70859	0.791175	1.3423	0.66694	2	1.11896	0.819058	0.941513	0.789267	-0.252398	-0.990965	1.188	0.275216	2	0.0225084	-0.990965	1.1447	0.711681	0.607137	1.8339	0.498645	0.947086	1.43044	1.56531	-0.990965	0.244043	-0.990965	1.34308	-0.990965	-0.990965
SERPINF1--NM-002615--chr17--+	2	1.39261	-0.773732	0.12896	0.494861	-0.773732	-0.773732	0.867249	0.58114	-0.773732	0.258299	0.703589	2	1.26445	-0.773732	-0.773732	-0.773732	-0.773732	-0.773732	0.849094	0.884286	1.35423	-0.269008	-0.773732	1.38322	0.793762	1.08336	0.127611	0.233802	1.61543	-0.773732	-0.0354877	2	-0.773732	0.428376	-0.773732	0.683838	0.848883	-0.773732	-0.773732	0.493271	-0.0479569	0.496982	-0.773732	-0.21586	1.97918	-0.0183996	-0.773732	-0.773732
SERPING1--NM-001032295--chr11--+	1.84409	0.904289	1.3973	1.16613	1.15413	0.837387	1.34572	0.89311	0.805246	0.33811	0.974924	-0.0700457	0.916173	0.999535	-0.28556	-1.06099	0.428308	-1.06099	2	1.25221	1.56081	0.57795	-0.0173387	1.59079	1.93319	0.823966	1.09136	1.31867	-0.385165	0.541587	1.74543	0.342459	1.15313	0.428982	0.642431	0.660194	0.981518	0.643934	0.741534	-0.027872	0.874205	1.27615	1.84955	0.00615531	1.03876	0.785583	1.07477	-1.06099	-1.06099
SF3B5--NM-031287--chr6---	-0.533792	-0.533792	-0.533792	2	0.425186	-0.533792	-0.533792	-0.533792	-0.533792	-0.533792	0.830438	1.41906	-0.533792	-0.533792	0.994348	-0.533792	-0.533792	-0.533792	-0.533792	-0.533792	-0.533792	-0.533792	-0.533792	-0.533792	0.0188363	-0.533792	0.301444	2	-0.533792	-0.533792	-0.533792	-0.533792	1.01213	-0.533792	-0.533792	-0.533792	-0.533792	1.43804	-0.533792	-0.533792	0.423837	0.425603	-0.533792	1.56923	-0.533792	-0.533792	1.20445	-0.533792	-0.533792
SF3B6--NM-016047--chr2---	1.11008	-0.569656	-0.569656	1.37435	-0.569656	-0.569656	0.590617	-0.569656	-0.569656	-0.569656	-0.569656	-0.569656	-0.569656	-0.569656	0.89076	-0.569656	-0.569656	-0.569656	-0.569656	-0.569656	-0.00396129	-0.569656	0.585184	-0.569656	-0.569656	-0.569656	0.228564	0.569016	-0.569656	-0.569656	-0.569656	-0.569656	0.907755	-0.569656	-0.569656	-0.569656	-0.569656	1.13877	-0.569656	-0.569656	-0.569656	-0.569656	-0.569656	-0.569656	-0.569656	2	0.38456	-0.569656	-0.569656
SH3BGRL3--NM-031286--chr1--+	-0.732812	-0.732812	-0.732812	-0.116848	-0.732812	-0.732812	-0.732812	-0.732812	-0.199735	-0.732812	-0.732812	-0.732812	-0.732812	-0.732812	0.568447	-0.732812	-0.732812	-0.732812	-0.732812	-0.732812	-0.427257	-0.217675	-0.109035	-0.732812	-0.732812	-0.732812	-0.732812	-0.732812	-0.732812	-0.732812	-0.732812	-0.732812	0.0651991	-0.732812	0.0874629	-0.732812	-0.473547	-0.138319	-0.732812	-0.732812	-0.732812	-0.732812	-0.732812	-0.732812	-0.732812	-0.732812	-0.732812	-0.732812	-0.732812
SHFM1--NM-006304--chr7---	-0.0103999	-0.74798	1.68899	0.122549	-0.74798	-0.74798	0.137737	-0.74798	0.00540549	0.490071	0.247279	-0.74798	-0.74798	-0.74798	1.09106	-0.74798	1.39319	2	-0.74798	0.177149	0.850962	-0.019949	0.75248	-0.74798	-0.344817	-0.74798	1.32437	0.121248	-0.74798	1.55605	-0.74798	0.494592	2	-0.74798	1.15373	0.189138	0.201727	0.690546	1.84352	-0.74798	0.473879	-0.74798	-0.74798	0.786257	-0.209986	-0.74798	-0.74798	1.54927	-0.74798
SIVA1--NM-006427--chr14--+	0.259837	-0.610414	2	-0.610414	0.215039	-0.610414	1.16722	0.495151	-0.610414	0.85033	-0.610414	1.07053	-0.610414	-0.610414	-0.610414	-0.610414	-0.610414	-0.610414	-0.610414	0.481121	0.996905	-0.610414	1.72313	-0.610414	0.607558	-0.610414	0.108526	0.415165	-0.610414	2	-0.610414	0.855664	2	-0.610414	-0.610414	-0.610414	0.189849	1.37638	-0.610414	-0.610414	-0.610414	-0.610414	-0.610414	1.19979	0.948244	-0.610414	-0.610414	-0.610414	-0.610414
SKP1--NM-170679--chr5---	0.287132	-0.627236	-0.627236	0.451947	-0.627236	2	-0.627236	-0.627236	-0.627236	-0.627236	0.606573	1.13892	-0.627236	-0.627236	1.6526	-0.627236	-0.627236	-0.627236	-0.627236	-0.627236	-0.0918972	0.944081	-0.0238312	-0.627236	0.291638	-0.627236	1.18994	-0.627236	0.577286	-0.627236	2	0.255346	1.67535	-0.627236	-0.627236	-0.627236	-0.172997	0.190382	-0.627236	0.453042	-0.627236	-0.627236	0.24169	2	0.039708	-0.627236	0.275776	-0.627236	-0.627236
SLC25A3--NM-002635--chr12--+	0.565706	0.23159	-0.704146	-0.704146	-0.0113055	1.99874	0.172999	0.863051	0.589806	-0.704146	-0.704146	-0.704146	-0.704146	-0.704146	1.1171	-0.704146	-0.704146	-0.704146	2	-0.704146	0.0780033	0.0168392	-0.222117	1.37327	0.318154	0.176335	0.366374	-0.704146	-0.704146	-0.704146	2	0.000903852	0.41275	-0.704146	-0.704146	0.223902	0.687886	0.127906	-0.704146	-0.704146	0.505887	-0.704146	-0.0100053	-0.704146	0.604107	-0.704146	0.551693	-0.704146	-0.704146
SLC25A5--NM-001152--chrX--+	0.0865401	0.311309	-0.713192	0.230692	-0.713192	-0.713192	-0.713192	0.302786	-0.713192	0.629183	-0.713192	0.831541	-0.713192	-0.713192	0.495586	-0.713192	-0.713192	-0.713192	-0.713192	0.289892	0.143153	0.0761863	0.242663	-0.713192	-0.276056	0.250812	-0.713192	0.229281	1.05764	-0.713192	-0.713192	0.634085	0.509654	-0.713192	-0.713192	-0.713192	0.316542	1.35079	2	0.897283	-0.713192	0.0457012	0.0467954	1.90099	-0.713192	-0.713192	-0.713192	-0.713192	-0.713192
SLC25A6--NM-001636--chrX---	-0.060488	0.130956	-0.741651	0.0622913	-0.741651	-0.741651	0.0763181	0.123697	-0.741651	-0.741651	0.17748	1.35056	-0.741651	-0.741651	-0.741651	-0.741651	-0.741651	-0.741651	2	-0.741651	-0.012269	-0.741651	-0.292142	-0.741651	0.21168	-0.741651	-0.178922	-0.741651	-0.741651	1.38614	-0.741651	-0.0841669	-0.741651	-0.741651	-0.741651	0.123787	0.135413	0.917539	-0.741651	-0.741651	-0.0964616	-0.0952721	-0.741651	0.675232	-0.244808	-0.741651	-0.0689482	-0.741651	-0.741651
SLC27A5--NM-012254--chr19---	1.48217	1.93922	-0.60808	2	1.39426	-0.60808	1.22895	0.534425	-0.60808	-0.60808	0.605435	1.12903	2	-0.60808	-0.60808	-0.60808	-0.60808	-0.60808	-0.60808	1.30012	1.3415	1.46019	0.871838	2	1.23997	1.23506	0.709957	-0.60808	0.576631	-0.60808	-0.60808	1.85215	-0.60808	-0.60808	-0.60808	0.534544	0.549894	0.19609	-0.60808	0.45443	0.243753	0.884175	2	-0.60808	0.0478942	-0.60808	0.938124	-0.60808	-0.60808
SLPI--NM-003064--chr20---	0.407202	-0.488192	2	1.31332	-0.488192	-0.488192	-0.488192	-0.488192	-0.488192	-0.488192	-0.488192	-0.488192	-0.488192	-0.488192	-0.488192	-0.488192	2	-0.488192	-0.488192	-0.488192	0.470587	-0.488192	-0.488192	2	1.35177	-0.488192	0.824079	-0.488192	0.691335	-0.488192	-0.488192	0.376076	2	-0.488192	-0.488192	-0.488192	1.67263	2	2	-0.488192	1.92645	1.50609	0.999443	1.37431	0.684287	2	-0.488192	-0.488192	-0.488192
SMDT1--NM-033318--chr22--+	-0.635783	1.13449	-0.635783	1.01226	0.722849	-0.635783	1.0374	-0.635783	-0.635783	-0.635783	-0.635783	1.88016	-0.635783	-0.635783	0.602293	-0.635783	-0.635783	-0.635783	-0.635783	1.10222	-0.635783	-0.635783	-0.0952368	-0.635783	-0.188052	-0.635783	0.0409129	-0.635783	-0.635783	-0.635783	-0.635783	0.744149	2	-0.635783	0.651645	-0.635783	0.117457	1.69904	-0.635783	-0.635783	0.140073	0.141504	-0.635783	2	2	2	0.173159	-0.635783	-0.635783
SNRPD2--NM-004597--chr19---	-0.594554	-0.594554	-0.594554	-0.594554	-0.594554	-0.594554	-0.594554	1.0154	-0.594554	-0.594554	-0.594554	-0.594554	-0.594554	-0.594554	-0.594554	-0.594554	-0.594554	-0.594554	-0.594554	0.346618	0.208935	-0.594554	-0.0993731	-0.594554	0.159515	0.30995	0.0253501	0.289748	-0.594554	-0.594554	-0.594554	-0.594554	2	-0.594554	-0.594554	1.01555	-0.221785	0.260199	-0.594554	-0.594554	-0.594554	-0.594554	0.118526	-0.594554	-0.594554	-0.594554	-0.594554	-0.594554	-0.594554
SNRPE--NM-003094--chr1--+	-0.45659	-0.45659	2	-0.45659	-0.45659	-0.45659	-0.45659	-0.45659	-0.45659	-0.45659	-0.45659	-0.45659	-0.45659	-0.45659	-0.45659	-0.45659	-0.45659	-0.45659	-0.45659	0.806212	0.621479	-0.45659	-0.45659	-0.45659	-0.45659	0.757013	-0.45659	0.729907	-0.45659	-0.45659	-0.45659	-0.45659	1.08287	-0.45659	-0.45659	0.822577	-0.45659	0.173851	-0.45659	-0.45659	0.497037	-0.45659	-0.45659	-0.45659	-0.45659	-0.45659	-0.45659	-0.45659	-0.45659
SNRPF--NM-003095--chr12--+	-0.47201	-0.47201	2	-0.47201	0.477289	-0.47201	0.729815	0.799427	-0.47201	-0.47201	0.87845	-0.47201	-0.47201	-0.47201	-0.47201	-0.47201	-0.47201	-0.47201	-0.47201	1.65153	0.113943	-0.47201	-0.47201	-0.47201	-0.47201	-0.47201	1.51697	0.70744	-0.47201	-0.47201	-0.47201	-0.47201	1.05831	-0.47201	-0.47201	0.79956	0.448319	-0.47201	2	-0.47201	-0.47201	0.477701	-0.47201	-0.47201	0.257991	-0.47201	-0.47201	-0.47201	-0.47201
SNRPG--NM-003096--chr2---	2	-0.473303	-0.473303	0.623825	0.408418	-0.473303	-0.473303	-0.473303	-0.473303	-0.473303	0.781022	-0.473303	-0.473303	-0.473303	-0.473303	-0.473303	-0.473303	-0.473303	-0.473303	-0.473303	1.24358	0.444235	-0.473303	2	0.0348044	-0.473303	0.889059	0.622185	-0.473303	-0.473303	-0.473303	-0.473303	1.86757	-0.473303	-0.473303	0.707747	-0.0115106	1.17034	-0.473303	-0.473303	-0.473303	-0.473303	-0.473303	-0.473303	0.204732	-0.473303	-0.473303	-0.473303	2
SOD1--NM-000454--chr21--+	0.364959	-1.30981	1.6839	1.60121	1.16931	-1.30981	0.793512	-0.649948	0.390302	0.106703	0.510533	-0.306531	-1.30981	-1.30981	0.664708	-1.30981	0.198024	-1.30981	2	0.651403	0.810541	0.349528	1.04352	1.7388	0.802932	0.598606	0.62179	0.56909	-0.159681	1.06742	2	1.19408	1.49957	-0.370889	0.0293921	0.668751	0.533112	1.0505	1.30724	-0.263833	0.0909044	-0.152939	0.653662	-0.229382	0.336024	-1.30981	0.852533	0.307936	1.03934
SOD2--NM-000636--chr6---	-0.464455	-0.464455	2	1.48076	-0.464455	2	-0.464455	1.6099	-0.464455	-0.464455	0.840127	-0.464455	-0.464455	-0.464455	-0.464455	-0.464455	-0.464455	-0.464455	-0.464455	-0.464455	-0.464455	-0.464455	-0.464455	-0.464455	1.52228	0.700956	0.334262	-0.464455	-0.464455	-0.464455	-0.464455	-0.464455	1.01388	-0.464455	-0.464455	-0.464455	0.780418	0.636855	-0.464455	1.48249	1.13715	0.452992	0.454314	-0.464455	-0.464455	2	-0.464455	-0.464455	2
SON--NM-032195--chr21--+	-0.607708	0.382105	-0.607708	0.304217	0.125172	-0.607708	-0.607708	-0.607708	0.181504	-0.607708	-0.607708	-0.607708	-0.607708	-0.607708	-0.607708	-0.607708	-0.607708	-0.607708	-0.607708	-0.607708	-0.607708	0.154944	-0.607708	-0.607708	-0.607708	-0.607708	-0.607708	0.302855	-0.607708	-0.607708	-0.607708	0.138087	-0.607708	-0.607708	-0.607708	-0.607708	-0.607708	0.44666	2	-0.607708	-0.607708	0.125491	0.126548	-0.607708	0.404049	-0.607708	0.15535	-0.607708	-0.607708
SPARCL1--NM-004684--chr4---	-0.31127	-0.31127	-0.31127	-0.31127	-0.31127	-0.31127	-0.31127	-0.31127	-0.31127	-0.31127	-0.31127	-0.31127	-0.31127	-0.31127	-0.31127	-0.31127	-0.31127	-0.31127	-0.31127	-0.31127	-0.31127	-0.31127	-0.31127	-0.31127	-0.31127	-0.31127	-0.31127	-0.31127	-0.31127	-0.31127	-0.31127	-0.31127	-0.31127	-0.31127	-0.31127	-0.31127	-0.31127	-0.31127	-0.31127	-0.31127	-0.31127	-0.31127	-0.31127	-0.31127	-0.31127	-0.31127	-0.31127	-0.31127	-0.31127
SPCS1--NM-014041--chr3--+	1.37321	0.461347	-0.658446	0.373231	0.170675	-0.658446	0.391232	1.21701	0.234403	-0.658446	-0.658446	-0.658446	-0.658446	-0.658446	-0.658446	-0.658446	-0.658446	-0.658446	2	1.77659	0.27755	0.204355	0.386316	-0.658446	0.564938	1.13303	0.063689	-0.658446	0.493053	-0.658446	-0.658446	-0.658446	-0.658446	-0.658446	0.71543	0.452147	0.467067	0.534379	-0.658446	-0.658446	0.169508	0.171035	-0.658446	1.1598	-0.0208606	2	-0.658446	-0.658446	-0.658446
SPCS2--NM-014752--chr11--+	0.793101	-0.639961	2	0.332946	0.141928	-0.639961	-0.639961	-0.639961	0.820298	-0.639961	-0.639961	-0.639961	-0.639961	-0.639961	2	-0.639961	-0.639961	-0.639961	-0.639961	1.10909	-0.157342	0.776616	0.345285	-0.639961	0.799365	0.353685	0.568149	-0.639961	-0.639961	-0.639961	-0.639961	0.155706	0.620486	-0.639961	-0.639961	-0.639961	0.118067	0.817579	-0.639961	-0.639961	-0.639961	0.727837	-0.639961	2	-0.0386966	-0.639961	0.174124	-0.639961	-0.639961
SPP1--NM-001040058--chr4--+	-0.417817	-0.417817	-0.417817	-0.417817	-0.417817	2	-0.417817	-0.417817	-0.417817	-0.417817	-0.417817	-0.417817	-0.417817	-0.417817	-0.417817	-0.417817	-0.417817	-0.417817	-0.417817	-0.417817	-0.417817	-0.417817	-0.417817	-0.417817	-0.417817	-0.417817	-0.417817	-0.417817	-0.417817	-0.417817	-0.417817	-0.417817	-0.417817	1.3357	1.10683	-0.417817	-0.417817	-0.0974261	-0.417817	-0.417817	-0.417817	-0.417817	0.504021	-0.417817	-0.417817	-0.417817	-0.417817	-0.417817	-0.417817
SPTBN1--NM-178313--chr2--+	0.357338	-0.528536	-0.528536	-0.528536	-0.528536	-0.528536	-0.528536	1.37215	2	-0.528536	0.666823	1.18258	-0.528536	-0.528536	-0.528536	2	-0.528536	-0.528536	-0.528536	-0.528536	-0.00987981	1.50879	0.056065	-0.528536	0.361703	-0.528536	1.62246	-0.528536	2	-0.528536	-0.528536	1.47212	-0.528536	1.07282	-0.528536	0.596993	0.612113	1.19921	-0.528536	1.25541	-0.528536	-0.528536	-0.528536	-0.528536	-0.528536	-0.528536	2	-0.528536	-0.528536
SQSTM1--NM-001142299--chr5--+	-0.514493	-0.514493	-0.514493	1.47629	-0.514493	-0.514493	-0.514493	2	-0.514493	1.14636	0.820648	1.39672	-0.514493	2	-0.514493	-0.514493	-0.514493	-0.514493	-0.514493	0.726569	0.955121	-0.514493	0.138469	-0.514493	0.0263513	-0.514493	0.302934	-0.514493	2	-0.514493	-0.514493	1.15242	0.998468	-0.514493	-0.514493	-0.514493	-0.0229478	1.41529	-0.514493	0.654509	1.12463	-0.514493	-0.514493	-0.514493	-0.514493	-0.514493	-0.514493	-0.514493	2
SRGN--NM-002727--chr10--+	-0.702926	-0.702926	-0.702926	-0.702926	-0.702926	-0.702926	-0.702926	0.0452448	-0.702926	-0.702926	-0.702926	-0.702926	-0.702926	-0.702926	-0.702926	-0.702926	-0.702926	-0.702926	-0.702926	-0.702926	-0.702926	-0.702926	-0.314285	-0.702926	-0.702926	-0.702926	-0.702926	-0.702926	-0.702926	-0.702926	-0.702926	-0.702926	-0.702926	-0.702926	-0.702926	-0.702926	-0.702926	-0.33415	-0.702926	-0.702926	-0.702926	-0.702926	-0.702926	-0.702926	-0.702926	-0.702926	-0.121314	-0.702926	-0.702926
SRP14--NM-003134--chr15---	-0.209831	-1.15502	0.641326	0.573238	0.0554927	-1.15502	0.837374	0.374856	-0.599678	-1.15502	-1.15502	0.514939	0.94031	-1.15502	-0.333244	-1.15502	0.423288	-1.15502	-1.15502	-0.00141604	-0.347498	0.0953537	-0.0489924	1.14891	-0.037781	-0.0407489	-0.0745157	0.286634	-1.15502	-1.15502	-1.15502	0.554438	1.41584	-1.15502	-0.300487	-1.15502	0.0252219	1.56436	-1.15502	-1.15502	-1.15502	0.313215	-0.251717	-0.0240943	0.23814	-1.15502	-0.618081	-1.15502	-1.15502
SRSF3--NM-003017--chr6--+	-0.511304	-0.511304	-0.511304	-0.511304	-0.511304	-0.511304	-0.511304	-0.511304	-0.511304	-0.511304	-0.511304	1.322	-0.511304	-0.511304	-0.511304	-0.511304	-0.511304	-0.511304	-0.511304	1.50257	-0.511304	-0.511304	0.11504	-0.511304	0.00749277	-0.511304	-0.511304	-0.511304	-0.511304	-0.511304	-0.511304	-0.511304	-0.511304	-0.511304	-0.511304	-0.511304	-0.511304	0.337397	-0.511304	-0.511304	-0.511304	-0.511304	-0.511304	1.46298	0.180995	-0.511304	-0.511304	-0.511304	2
SRSF7--NM-001195446--chr2---	-0.437039	-0.437039	-0.437039	-0.437039	-0.437039	-0.437039	-0.437039	-0.437039	-0.437039	-0.437039	0.904977	-0.437039	-0.437039	-0.437039	-0.437039	-0.437039	-0.437039	-0.437039	-0.437039	-0.437039	-0.437039	0.544645	-0.437039	-0.437039	-0.437039	0.761813	-0.437039	-0.437039	-0.437039	-0.437039	-0.437039	-0.437039	-0.437039	-0.437039	-0.437039	-0.437039	-0.437039	-0.437039	-0.437039	-0.437039	-0.437039	0.506733	0.508094	-0.437039	-0.437039	-0.437039	-0.437039	-0.437039	-0.437039
SSB--NM-003142--chr2--+	-0.468786	-0.468786	-0.468786	-0.468786	-0.468786	2	-0.468786	-0.468786	-0.468786	-0.468786	-0.468786	-0.468786	-0.468786	-0.468786	-0.468786	-0.468786	-0.468786	-0.468786	-0.468786	0.802125	0.124453	-0.468786	0.199881	-0.468786	-0.468786	-0.468786	-0.468786	-0.468786	-0.468786	-0.468786	-0.468786	-0.468786	-0.468786	-0.468786	-0.468786	-0.468786	-0.468786	1.12562	-0.468786	-0.468786	-0.468786	-0.468786	-0.468786	-0.468786	-0.468786	-0.468786	-0.468786	-0.468786	-0.468786
SSBP1--NM-003143--chr7--+	1.22133	-0.529234	-0.529234	-0.529234	-0.529234	-0.529234	-0.529234	0.749999	0.499299	1.16097	-0.529234	-0.529234	2	-0.529234	-0.529234	-0.529234	2	-0.529234	-0.529234	-0.529234	0.0603121	0.464684	-0.529234	-0.529234	-0.529234	0.684558	0.302642	-0.529234	-0.529234	-0.529234	-0.529234	1.16714	1.01047	-0.529234	-0.529234	-0.529234	1.09541	1.25123	-0.529234	-0.529234	-0.529234	1.1416	0.427678	-0.529234	-0.529234	-0.529234	-0.529234	-0.529234	-0.529234
SSR2--NM-003145--chr1---	-0.558485	-0.558485	-0.558485	-0.558485	-0.558485	-0.558485	-0.558485	1.31193	-0.558485	-0.558485	0.617836	1.12538	-0.558485	-0.558485	0.759168	-0.558485	-0.558485	-0.558485	-0.558485	-0.558485	-0.04809	-0.558485	-0.558485	-0.558485	-0.558485	-0.558485	-0.558485	0.468877	-0.558485	-0.558485	-0.558485	-0.558485	-0.558485	-0.558485	-0.558485	-0.558485	0.243169	0.434548	-0.558485	0.471459	-0.558485	0.268762	0.269955	1.25487	0.583052	-0.558485	0.302452	-0.558485	-0.558485
SSR3--NM-007107--chr3---	-0.477187	-0.477187	-0.477187	-0.477187	-0.477187	2	-0.477187	-0.477187	-0.477187	-0.477187	-0.477187	-0.477187	-0.477187	-0.477187	1.01967	-0.477187	-0.477187	-0.477187	2	-0.477187	0.102625	0.500321	-0.477187	-0.477187	0.518022	-0.477187	-0.477187	-0.477187	-0.477187	-0.477187	-0.477187	-0.477187	1.03709	-0.477187	1.07934	-0.477187	0.0147876	0.87422	-0.477187	-0.477187	-0.477187	0.46257	-0.477187	-0.477187	-0.477187	-0.477187	-0.477187	-0.477187	-0.477187
SSR4--NM-006280--chrX--+	0.00354469	-0.957766	1.69189	-0.957766	-0.957766	-0.957766	-0.957766	-0.255283	0.620904	-0.957766	-0.957766	-0.957766	-0.957766	-0.957766	2	-0.957766	2	-0.957766	2	-0.264198	0.545136	-0.411962	-0.296854	1.38547	1.03183	-0.957766	1.09861	-0.957766	-0.229333	-0.957766	1.1913	-0.424025	0.434719	-0.957766	0.467941	-0.957766	-0.245772	0.618411	0.985076	-0.304469	-0.0417398	-0.040235	0.275279	2	0.635681	-0.957766	-0.00706373	-0.957766	0.744694
SUB1--NM-006713--chr5--+	1.02712	-0.850936	-0.850936	0.493886	-0.850936	2	-0.0482847	-0.850936	-0.168206	-0.850936	-0.850936	0.440134	-0.850936	-0.850936	1.68998	-0.850936	-0.850936	-0.850936	-0.850936	-0.0125694	0.141822	-0.191182	-0.409844	1.05005	-0.179235	0.518939	0.128667	-0.850936	-0.850936	-0.850936	-0.850936	-0.205764	1.32191	-0.850936	0.87242	-0.850936	0.422874	1.51065	-0.850936	-0.850936	-0.850936	-0.216662	-0.850936	-0.850936	0.0243135	1.55491	-0.850936	-0.850936	-0.850936
SUMO2--NM-006937--chr17---	-0.795543	-0.795543	-0.795543	-0.795543	-0.161961	2	-0.795543	0.637612	-0.113262	-0.795543	-0.795543	-0.795543	-0.795543	0.984507	-0.795543	-0.795543	1.14354	-0.795543	2	0.0422725	0.196563	-0.795543	0.303651	-0.795543	0.13932	0.00963117	-0.795543	-0.00835269	-0.795543	-0.795543	1.80049	-0.795543	1.37588	-0.795543	-0.795543	-0.795543	-0.463711	0.729437	-0.795543	-0.00637415	-0.795543	-0.795543	0.314239	-0.795543	-0.795543	1.60872	-0.795543	-0.795543	-0.795543
TAGLN--NM-003186--chr11--+	0.167819	-0.405073	-0.405073	-0.405073	-0.405073	-0.405073	0.28288	-0.405073	0.180095	-0.405073	-0.405073	-0.405073	-0.405073	-0.405073	-0.405073	-0.405073	-0.405073	-0.405073	-0.405073	-0.405073	-0.405073	0.160402	-0.405073	-0.405073	-0.405073	-0.405073	-0.405073	-0.405073	-0.405073	-0.405073	2	-0.405073	-0.405073	-0.405073	-0.405073	-0.405073	-0.405073	-0.0463376	-0.405073	-0.405073	-0.405073	-0.405073	-0.405073	-0.405073	-0.405073	-0.405073	0.160703	-0.405073	-0.405073
TBCA--NM-004607--chr5---	0.75158	-0.682469	-0.682469	1.50743	-0.682469	-0.682469	0.308095	0.36547	-0.682469	-0.682469	-0.682469	2	2	-0.682469	0.564336	-0.682469	-0.682469	-0.682469	-0.682469	-0.682469	0.200815	0.131742	0.303456	-0.682469	0.146487	0.311862	-0.00100203	0.289653	-0.682469	1.8943	-0.682469	-0.682469	0.578846	-0.682469	0.614036	1.63887	1.10821	1.20077	-0.682469	0.292097	0.0988577	-0.682469	-0.682469	1.03338	0.397689	-0.682469	-0.682469	-0.682469	-0.682469
TCEB2--NM-007108--chr16---	-0.855385	-0.855385	1.40967	0.523924	-0.855385	1.68138	-0.855385	0.61549	-0.855385	-0.855385	-0.855385	1.2503	-0.855385	-0.855385	0.853921	-0.855385	1.13474	-0.855385	-0.855385	0.599216	0.410795	-0.855385	0.539226	1.09435	-0.480662	0.549621	0.507043	-0.855385	0.0477063	-0.855385	1.80897	0.692853	2	-0.855385	1.42087	0.0156245	0.0273257	1.0085	2	-0.855385	0.280279	-0.204845	0.283606	-0.855385	0.0423101	-0.855385	0.323269	-0.855385	-0.855385
TCF25--NM-014972--chr16--+	-0.516573	0.714214	-0.516573	0.617364	-0.516573	-0.516573	0.637148	-0.516573	-0.516573	-0.516573	-0.516573	-0.516573	-0.516573	-0.516573	-0.516573	-0.516573	-0.516573	-0.516573	-0.516573	0.688485	0.0459274	1.13447	0.117447	-0.516573	0.448922	0.641536	0.891496	-0.516573	-0.516573	-0.516573	-0.516573	-0.516573	-0.516573	-0.516573	-0.516573	-0.516573	-0.516573	0.342528	-0.516573	-0.516573	-0.516573	0.395125	-0.516573	-0.516573	-0.516573	-0.516573	-0.516573	-0.516573	-0.516573
TF--NM-001063--chr3--+	1.6989	1.76759	0.200558	0.951339	1.03142	0.108861	1.59465	0.555544	1.48185	1.37086	1.21858	0.79546	0.906184	0.681662	0.515579	-0.657557	0.211424	-0.114718	0.71823	1.43959	1.38844	1.12511	0.904892	0.90135	1.70532	0.814401	1.66471	0.633831	0.207102	-0.178	1.36042	1.05354	1.55187	0.212157	1.09923	1.47821	1.98862	0.767332	0.539165	0.715197	1.57564	0.916589	1.77799	-0.745809	1.16358	0.939964	1.50061	-0.562655	1.23497
TIMP1--NM-003254--chrX--+	-0.456772	-0.878024	1.14051	-0.380842	-0.878024	-0.878024	-0.878024	-0.878024	0.32462	-0.878024	-0.309605	-0.0643494	1.41063	-0.878024	-0.241311	-0.878024	-0.878024	-0.878024	0.954542	-0.878024	0.628002	0.294008	-0.878024	1.29938	-0.454696	-0.878024	-0.0408466	-0.878024	-0.878024	0.43787	0.759156	-0.471416	1.11389	-0.878024	0.208091	-0.342811	0.232679	0.267284	1.96863	-0.878024	-0.180188	0.0602168	-0.878024	-0.878024	-0.123544	0.638218	0.754627	-0.878024	0.418924
TLN1--NM-006289--chr9---	0.454758	0.716389	-0.476132	-0.476132	-0.476132	-0.476132	-0.476132	-0.476132	-0.476132	-0.476132	-0.476132	-0.476132	-0.476132	-0.476132	0.930888	-0.476132	-0.476132	2	-0.476132	-0.476132	0.0688798	-0.476132	-0.476132	2	-0.476132	-0.476132	-0.476132	-0.476132	-0.476132	-0.476132	-0.476132	-0.476132	-0.476132	-0.476132	-0.476132	-0.476132	-0.476132	0.584252	-0.476132	0.623666	-0.476132	1.06849	0.408495	-0.476132	-0.476132	-0.476132	-0.476132	-0.476132	-0.476132
TM4SF4--NM-004617--chr3--+	-0.563727	-0.563727	-0.563727	-0.563727	0.240598	2	-0.563727	-0.563727	-0.563727	-0.563727	0.580495	-0.563727	-0.563727	-0.563727	0.717971	-0.563727	-0.563727	-0.563727	-0.563727	-0.563727	0.695738	0.893497	-0.00413503	-0.563727	0.288428	-0.563727	0.679048	-0.563727	0.553335	-0.563727	2	0.254772	1.57167	-0.563727	-0.563727	-0.563727	-0.563727	1.23528	-0.563727	0.438113	0.841011	0.240947	0.242107	-0.563727	0.0547906	-0.563727	0.273717	-0.563727	-0.563727
TMA7--NM-015933--chr3--+	-0.198853	-0.869234	2	0.910473	-0.869234	-0.869234	-0.0642123	-0.869234	-0.184488	-0.869234	0.0353489	-0.869234	-0.869234	0.917248	0.802256	-0.869234	1.07686	-0.869234	-0.869234	0.553186	-0.869234	-0.869234	1.11314	1.03736	0.0690068	-0.0611507	-0.869234	0.477794	0.0138772	1.22488	-0.869234	0.260131	0.155825	0.342586	-0.869234	-0.869234	0.586031	0.0455709	-0.869234	-0.0772138	-0.869234	0.623884	-0.869234	0.525223	0.00860036	1.54372	-0.869234	-0.869234	-0.869234
TMBIM6--NM-003217--chr12--+	-0.194123	0.00712304	-0.910159	0.530493	0.2775	1.73943	-0.910159	-0.910159	-0.178779	0.291731	1.20228	0.472911	-0.910159	-0.910159	0.875165	-0.910159	1.16847	-0.910159	2	-0.910159	0.848525	0.32033	0.268136	1.12629	1.40666	0.557332	-0.31862	-0.0663202	-0.910159	1.32657	-0.910159	-0.219014	2	0.384191	0.215256	-0.910159	0.817825	0.833978	-0.910159	-0.910159	1.31102	0.27796	1.02562	0.579266	-0.387879	-0.910159	1.6361	-0.910159	2
TMEM14B--NM-030969--chr6--+	-0.48775	-0.48775	-0.48775	0.679617	-0.48775	-0.48775	-0.48775	-0.48775	0.52253	-0.48775	0.846878	2	-0.48775	-0.48775	-0.48775	-0.48775	-0.48775	-0.48775	-0.48775	0.752835	-0.48775	-0.48775	1.52435	-0.48775	0.506209	0.704502	0.329363	-0.48775	-0.48775	-0.48775	2	-0.48775	1.02463	-0.48775	-0.48775	0.768912	0.421789	0.131599	2	-0.48775	0.449099	-0.48775	-0.48775	-0.48775	-0.48775	-0.48775	0.48905	-0.48775	-0.48775
TMEM176A--NM-018487--chr7--+	2	1.23247	-0.634617	-0.634617	0.184825	-0.634617	-0.634617	0.462897	-0.634617	0.815488	1.31861	1.03409	2	2	0.67117	-0.634617	-0.634617	-0.634617	2	-0.634617	0.290452	0.849995	1.12284	-0.634617	1.38133	-0.634617	0.631516	-0.634617	1.86661	-0.634617	-0.634617	-0.634617	-0.634617	-0.634617	-0.634617	0.463011	0.759241	0.137885	-0.634617	-0.634617	1.28666	0.18518	0.186362	-0.634617	-0.00447462	2	0.850698	-0.634617	-0.634617
TMEM176B--NM-001101312--chr7---	1.65849	-0.725167	-0.725167	1.23741	0.501019	2	-0.725167	0.213993	0.584414	0.515712	0.94624	-0.725167	-0.725167	-0.725167	-0.725167	-0.725167	1.42089	-0.725167	2	1.33421	1.91779	1.63652	1.0315	2	1.35968	1.66148	1.60059	0.146046	0.911778	1.58413	2	0.944384	2	-0.725167	-0.725167	0.214091	0.879631	0.716644	-0.725167	0.148235	-0.725167	1.57109	0.50307	-0.725167	1.16914	1.93572	0.545841	-0.725167	2
TMEM176B--NM-001101314--chr7---	1.73746	1.57552	-0.571231	2	1.07633	-0.571231	2	-0.571231	0.443367	1.09607	-0.571231	-0.571231	-0.571231	2	-0.571231	-0.571231	-0.571231	-0.571231	2	-0.571231	1.86848	1.13575	0.615995	2	1.74667	0.626117	0.249374	-0.571231	0.737287	-0.571231	-0.571231	0.387552	0.947613	1.22434	-0.571231	-0.571231	1.0314	0.560259	-0.571231	2	-0.571231	1.07697	2	-0.571231	0.729468	2	0.409745	-0.571231	-0.571231
TMEM205--NM-001145416--chr19---	0.50168	1.63004	2	-0.470036	0.451658	-0.470036	-0.470036	-0.470036	0.522503	-0.470036	-0.470036	-0.470036	-0.470036	2	-0.470036	-0.470036	-0.470036	2	-0.470036	0.748764	0.973215	0.4891	0.171214	2	0.889942	-0.470036	0.332728	-0.470036	1.68162	-0.470036	2	-0.470036	2	-0.470036	-0.470036	-0.470036	0.781144	0.855972	-0.470036	-0.470036	-0.470036	-0.470036	-0.470036	-0.470036	0.238738	-0.470036	0.489611	-0.470036	-0.470036
TMEM208--NM-014187--chr16--+	-0.491946	-0.491946	2	-0.491946	-0.491946	2	0.711702	1.65861	-0.491946	-0.491946	0.860563	-0.491946	-0.491946	-0.491946	-0.491946	-0.491946	-0.491946	-0.491946	2	1.63482	0.996784	-0.491946	1.15748	-0.491946	0.51533	-0.491946	0.336114	-0.491946	-0.491946	-0.491946	-0.491946	-0.491946	2	-0.491946	1.08345	0.781552	-0.491946	1.08526	-0.491946	0.692262	0.457455	-0.491946	-0.491946	-0.491946	0.820569	-0.491946	1.23136	-0.491946	-0.491946
TMEM258--NM-014206--chr11---	0.242944	-0.608466	-0.608466	2	0.199115	-0.608466	0.413943	1.21827	-0.608466	-0.608466	-0.608466	-0.608466	-0.608466	-0.608466	2	-0.608466	-0.608466	-0.608466	-0.608466	-0.608466	0.303214	0.231921	-0.608466	1.81299	-0.143083	-0.608466	0.094909	-0.608466	-0.608466	-0.608466	2	0.82587	1.53557	-0.608466	1.58673	-0.608466	0.17447	0.731256	2	-0.608466	0.197979	-0.608466	0.200631	2	-0.608466	-0.608466	-0.608466	-0.608466	-0.608466
TMEM59--NM-004872--chr1---	-0.556066	-0.556066	2	0.508369	-0.556066	-0.556066	-0.556066	0.589672	-0.556066	-0.556066	-0.556066	-0.556066	-0.556066	1.84731	1.69261	-0.556066	-0.556066	-0.556066	2	-0.556066	0.40965	-0.556066	-0.556066	2	0.350251	1.8786	0.7657	-0.556066	-0.556066	2	-0.556066	-0.556066	-0.556066	-0.556066	-0.556066	0.589791	-0.556066	0.863062	-0.556066	-0.556066	0.298177	-0.556066	0.942333	1.31992	0.101764	-0.556066	-0.556066	-0.556066	-0.556066
TMSB10--NM-021103--chr2--+	-0.606263	-1.19484	-0.0762418	-0.513665	-1.19484	0.584605	-0.788282	-0.468445	-0.228279	-1.19484	-0.738001	-0.540891	-1.19484	-1.19484	-0.350696	-1.19484	-1.19484	-1.19484	-1.19484	-0.770192	-0.99662	-0.860662	-0.971417	-0.231961	-0.85461	-1.19484	-0.37278	-1.19484	-1.19484	-1.19484	0.657184	-1.19484	-0.677158	-1.19484	-0.662715	-1.19484	-0.883507	0.0013396	0.510986	-0.794848	-0.874159	-1.19484	-0.873104	-0.0881528	-0.588465	-1.19484	-0.612759	-1.19484	-1.19484
TMSB4X--NM-021109--chrX--+	-1.28347	-0.967002	-1.78637	-0.62814	-1.51198	0.236992	-0.614949	-0.684512	-0.960497	-1.78637	-1.13234	-0.480569	-0.214712	-1.01548	-0.854333	-0.534697	-1.78637	-1.78637	-1.78637	-0.824911	-0.605465	-1.12109	-1.01068	-0.963643	-1.03794	-1.00544	-0.638774	-1.78637	-0.790014	-0.882726	0.088684	-0.599124	-0.221719	-1.26345	-0.655767	-1.41883	-1.31964	-0.195614	-0.0431756	-1.20383	-0.695172	-1.14207	-0.784162	-1.18464	-1.14915	-0.745144	-1.1208	-0.885386	-0.895736
TOB1--NM-001243877--chr17---	-0.468588	-0.468588	-0.468588	0.657101	-0.468588	-0.468588	-0.468588	-0.468588	-0.468588	1.13235	-0.468588	-0.468588	-0.468588	2	-0.468588	-0.468588	-0.468588	-0.468588	-0.468588	-0.468588	0.0898207	1.17044	0.16082	-0.468588	-0.468588	0.681098	-0.468588	-0.468588	-0.468588	-0.468588	-0.468588	0.452029	1.93322	-0.468588	1.03048	-0.468588	0.00522579	1.21784	2	-0.468588	-0.468588	0.436479	-0.468588	-0.468588	0.780335	-0.468588	1.17122	-0.468588	-0.468588
TOB1--NM-001243885--chr17---	0.449569	0.726213	-0.534735	0.62699	1.09789	-0.534735	0.647259	-0.534735	-0.534735	1.11745	-0.534735	-0.534735	-0.534735	2	-0.534735	-0.534735	-0.534735	-0.534735	-0.534735	0.699854	0.519247	1.15676	0.641724	2	0.00328862	1.48256	0.278428	0.625253	-0.534735	-0.534735	2	-0.534735	0.970334	-0.534735	-0.534735	0.715853	1.05336	0.808451	2	-0.534735	-0.534735	-0.534735	-0.534735	1.51271	-0.534735	-0.534735	1.15757	-0.534735	-0.534735
TOMM20--NM-014765--chr1---	-0.607302	-0.607302	-0.607302	0.418906	-0.607302	-0.607302	-0.607302	0.497288	0.280814	0.852153	-0.607302	2	2	-0.607302	2	-0.607302	-0.607302	-0.607302	-0.607302	0.48327	-0.607302	-0.607302	0.431921	-0.607302	1.17942	0.440782	-0.607302	-0.607302	0.538093	-0.607302	-0.607302	0.231956	2	-0.607302	0.759291	0.497403	0.512244	0.93009	-0.607302	-0.607302	0.216263	0.217781	-0.607302	-0.607302	0.531249	-0.607302	-0.607302	-0.607302	-0.607302
TOMM7--NM-019059--chr7---	0.819342	-1.00226	-1.00226	2	-0.466394	1.08825	-1.00226	0.209867	-1.00226	-0.0539742	0.275039	0.733007	-1.00226	0.503263	-0.14835	-1.00226	-1.00226	-1.00226	-1.00226	0.571527	0.385336	0.29701	0.147018	-1.00226	-0.0158177	-0.321265	0.775097	-1.00226	-1.00226	-1.00226	-1.00226	-0.456951	0.834276	-1.00226	0.454354	-1.00226	-1.00226	0.533739	-1.00226	0.498763	-1.00226	-0.466161	-0.465388	0.17289	0.935144	1.03121	0.570211	-1.00226	-1.00226
TPI1--NM-000365--chr12--+	0.0716186	0.285048	-0.687767	0.840102	-0.687767	2	-0.687767	-0.687767	-0.687767	-0.687767	-0.687767	-0.687767	-0.687767	-0.687767	1.20564	-0.687767	-0.687767	-0.687767	-0.687767	0.264712	0.440118	-0.687767	-0.186638	-0.687767	0.375041	0.227603	-0.687767	-0.687767	-0.687767	-0.687767	-0.687767	0.0452204	1.22454	-0.687767	-0.687767	0.941678	-0.687767	1.16196	-0.687767	-0.687767	0.0315138	-0.687767	0.033879	1.79453	-0.687767	-0.687767	0.617835	-0.687767	-0.687767
TPM2--NM-213674--chr9---	-0.318464	0.691094	-0.318464	-0.318464	-0.318464	-0.318464	-0.318464	-0.318464	-0.318464	-0.318464	-0.318464	-0.318464	-0.318464	-0.318464	-0.318464	-0.318464	-0.318464	-0.318464	-0.318464	-0.318464	0.142929	-0.318464	-0.318464	-0.318464	-0.318464	-0.318464	-0.318464	-0.318464	-0.318464	-0.318464	-0.318464	-0.318464	-0.318464	-0.318464	-0.318464	-0.318464	-0.318464	-0.0581779	-0.318464	-0.318464	-0.318464	-0.318464	-0.318464	-0.318464	-0.318464	-0.318464	-0.318464	-0.318464	-0.318464
TPSAB1--NM-003294--chr16--+	-0.147229	-0.147229	-0.147229	-0.147229	-0.147229	-0.147229	-0.147229	-0.147229	-0.147229	-0.147229	-0.147229	-0.147229	-0.147229	-0.147229	-0.147229	-0.147229	-0.147229	-0.147229	-0.147229	-0.147229	-0.147229	-0.147229	-0.147229	-0.147229	-0.147229	-0.147229	-0.147229	-0.147229	-0.147229	-0.147229	-0.147229	-0.147229	-0.147229	-0.147229	-0.147229	-0.147229	-0.147229	-0.147229	-0.147229	-0.147229	-0.147229	-0.147229	-0.147229	-0.147229	-0.147229	-0.147229	-0.147229	-0.147229	-0.147229
TPSB2--NM-024164--chr16---	-0.122131	-0.122131	-0.122131	-0.122131	-0.122131	-0.122131	-0.122131	-0.122131	-0.122131	-0.122131	-0.122131	-0.122131	-0.122131	-0.122131	-0.122131	-0.122131	-0.122131	-0.122131	-0.122131	-0.122131	-0.122131	-0.122131	-0.122131	-0.122131	-0.122131	-0.122131	-0.122131	-0.122131	-0.122131	-0.122131	-0.122131	-0.122131	-0.122131	-0.122131	-0.122131	-0.122131	-0.122131	-0.122131	-0.122131	-0.122131	-0.122131	-0.122131	-0.122131	-0.122131	-0.122131	-0.122131	-0.122131	-0.122131	-0.122131
TPT1--NM-001286273--chr13---	1.02348	-0.679333	-1.36611	1.8429	-0.172485	-1.36611	0.0767933	0.675895	-0.416421	0.828521	0.215501	0.280556	-1.36611	0.787108	-0.555801	0.953539	-1.36611	-1.36611	-1.36611	-0.2286	-0.569857	-0.133179	1.06286	-1.36611	0.145795	0.364655	0.883064	-0.734321	0.939245	-1.36611	2	1.42934	-0.0160788	-1.36611	0.729167	0.142549	0.26198	0.41551	-1.36611	0.576544	0.487078	-0.476554	0.300826	0.38632	0.828099	0.563531	-0.836667	-1.36611	-1.36611
TPT1--NM-003295--chr13---	0.119607	-1.28841	0.252862	0.951755	-0.745369	0.310143	-0.249278	0.900662	-0.863089	-0.59286	-1.07152	0.81838	-0.503319	-2	0.131299	-0.221647	-0.231755	-0.878829	0.929673	-0.731388	-0.220257	-0.0718228	0.447569	0.261302	-0.162251	-0.379794	0.0786581	-0.345673	-0.560938	-2	-0.483645	0.449124	0.450508	-1.88079	0.996064	-0.618039	-0.537935	0.740857	-0.712073	-1.91597	-0.0911982	-0.744731	-0.224117	0.0236148	0.264167	-1.15671	-1.18202	-2	-0.987703
TRMT112--NM-016404--chr11---	0.244346	-0.569041	-0.569041	1.06748	-0.569041	-0.569041	-0.569041	-0.569041	0.261776	-0.569041	-0.569041	-0.569041	-0.569041	-0.569041	-0.569041	-0.569041	-0.569041	-0.569041	-0.569041	-0.569041	-0.569041	-0.569041	-0.569041	-0.569041	-0.124441	0.411423	-0.569041	0.389524	-0.569041	-0.569041	-0.569041	0.216071	2	-0.569041	-0.569041	-0.569041	-0.569041	0.158281	-0.569041	-0.569041	-0.569041	-0.569041	-0.569041	-0.569041	0.0242469	-0.569041	-0.569041	-0.569041	-0.569041
TSPO--NM-000714--chr22--+	-0.550809	-0.550809	-0.550809	1.04942	-0.550809	-0.550809	-0.550809	0.4596	-0.550809	-0.550809	-0.550809	0.985458	-0.550809	-0.550809	-0.550809	-0.550809	1.75806	-0.550809	-0.550809	-0.550809	0.300842	-0.550809	-0.550809	-0.550809	-0.116069	-0.550809	0.614837	-0.550809	-0.550809	-0.550809	-0.550809	-0.550809	1.45206	-0.550809	-0.550809	-0.550809	-0.550809	1.50186	-0.550809	-0.550809	0.202536	-0.550809	-0.550809	-0.550809	0.0293217	-0.550809	-0.550809	-0.550809	-0.550809
TTR--NM-000371--chr18--+	0.964788	-0.23232	2	0.766404	1.12795	-0.0132029	1.00183	0.710011	0.834445	-0.208193	0.750596	1.29927	2	-0.0424468	0.502464	0.252496	1.65706	-2	1.81683	1.15631	1.1624	1.06798	1.1082	2	0.943191	1.80962	0.867017	1.61343	-0.375035	1.29624	2	0.830741	2	-1.20279	1.26533	0.955141	0.96307	0.642086	2	-0.243363	0.828796	0.543735	0.379063	0.256483	0.730464	1.40201	0.421531	-0.613109	0.992815
TUBA1A--NM-006009--chr12---	-0.47973	-0.47973	-0.47973	-0.47973	-0.47973	-0.47973	-0.47973	-0.47973	-0.47973	-0.47973	-0.47973	-0.47973	-0.47973	-0.47973	-0.47973	-0.47973	-0.47973	-0.47973	-0.47973	-0.47973	-0.47973	-0.47973	-0.47973	-0.47973	-0.47973	-0.47973	-0.47973	-0.47973	-0.47973	-0.47973	-0.47973	-0.47973	-0.47973	-0.47973	-0.47973	-0.47973	-0.47973	-0.47973	-0.47973	-0.47973	-0.47973	-0.47973	0.376938	-0.47973	-0.47973	-0.47973	-0.47973	-0.47973	-0.47973
TUBA1B--NM-006082--chr12---	-0.589171	-0.589171	1.93842	-0.589171	-0.589171	2	0.329483	-0.589171	-0.589171	-0.589171	-0.589171	-0.589171	-0.589171	-0.589171	-0.589171	-0.589171	-0.589171	-0.589171	-0.589171	-0.589171	-0.589171	-0.589171	-0.084331	-0.589171	-0.589171	-0.589171	-0.589171	-0.589171	-0.589171	-0.589171	-0.589171	-0.589171	-0.589171	-0.589171	-0.589171	-0.589171	-0.209131	-0.589171	-0.589171	-0.589171	-0.589171	-0.589171	-0.589171	-0.589171	0.412574	-0.589171	0.166336	-0.589171	-0.589171
TXN--NM-003329--chr9---	0.680326	0.693238	2	0.592176	-0.378363	-0.917897	-0.23484	0.302522	-0.917897	1.06821	-0.150363	0.829239	2	0.597924	0.91478	-0.917897	-0.917897	-0.917897	2	-0.204446	1.21765	0.664693	0.607357	1.49251	0.0752941	0.247868	-0.084254	-0.247556	-0.917897	-0.917897	-0.917897	-0.917897	1.53699	0.734099	0.54868	-0.1952	0.699705	0.972426	-0.917897	-0.917897	-0.379122	0.848923	0.619873	1.41693	0.100875	-0.917897	0.66533	-0.917897	0.833367
TXNIP--NM-006472--chr1---	0.734482	-0.69165	-0.69165	0.0325431	-0.69165	-0.69165	-0.69165	-0.69165	-0.69165	-0.69165	0.136306	0.493544	-0.69165	0.943498	-0.69165	-0.69165	-0.69165	-0.69165	-0.69165	-0.69165	-0.332407	-0.69165	0.0417279	-0.69165	-0.356258	-0.69165	-0.184742	-0.69165	-0.69165	-0.69165	-0.69165	-0.0993868	-0.69165	-0.69165	-0.69165	-0.69165	-0.38683	1.53726	-0.69165	-0.69165	-0.110462	-0.10939	-0.69165	-0.69165	-0.244092	-0.69165	-0.69165	1.21943	-0.69165
TYROBP--NM-003332--chr19---	0.212046	-0.426467	-0.426467	-0.426467	-0.426467	-0.426467	-0.426467	-0.426467	-0.426467	-0.426467	-0.426467	-0.426467	-0.426467	-0.426467	-0.426467	-0.426467	-0.426467	-0.426467	-0.426467	-0.426467	-0.426467	-0.426467	-0.426467	-0.426467	-0.426467	-0.426467	-0.426467	-0.426467	-0.426467	-0.426467	-0.426467	-0.426467	-0.426467	-0.426467	-0.426467	-0.426467	-0.426467	-0.215576	-0.426467	-0.426467	-0.426467	-0.426467	-0.426467	-0.426467	-0.426467	-0.426467	-0.426467	-0.426467	-0.426467
UBA52--NM-001033930--chr19--+	0.00838491	-0.968051	-0.968051	0.817346	-0.435301	-0.968051	-0.293582	0.612404	-0.394352	-0.0252815	-0.968051	1.56728	-0.968051	-0.968051	-0.119108	-0.968051	-0.968051	-0.968051	-0.968051	-0.968051	0.069319	-0.413659	-0.29674	0.629349	0.0126529	-0.968051	0.395731	-0.968051	-0.968051	-0.968051	-0.968051	-0.425913	1.45597	-0.968051	0.480088	0.237133	0.102334	0.836133	1.00536	-0.968051	-0.43605	-0.968051	-0.968051	-0.968051	-0.232578	-0.968051	-0.968051	-0.968051	0.761196
UBA52--NM-003333--chr19--+	-0.152781	-1.40961	1.16854	0.532226	-1.40961	-1.40961	-0.4959	1.19714	-0.617214	-0.658784	0.70025	-0.0356779	0.31429	-1.40961	-0.29431	-1.40961	-1.40961	-1.40961	-1.40961	0.0770841	-0.193861	-0.165075	0.0255208	0.485914	-0.783569	-0.870416	-0.152818	-1.40961	-0.419134	-0.0123137	0.328847	0.298532	0.520892	-0.601024	0.556488	-0.841287	-0.833652	0.654388	0.162021	-0.221145	-0.414824	-1.40961	0.408405	0.426474	0.32972	-1.40961	-1.40961	-0.0164277	-0.0324314
UBB--NM-001281720--chr17--+	0.120243	-0.170881	-0.986214	0.294319	0.990089	-0.986214	0.726775	-0.986214	-0.336121	0.082094	-0.986214	0.243137	2	0.709857	-0.0242268	-0.986214	2	-0.986214	-0.986214	0.364219	-0.304706	0.784566	-0.566209	0.823894	0.32165	-0.986214	-0.986214	0.292643	-0.986214	-0.986214	2	0.0859952	-0.0130316	0.164278	0.654758	0.379451	0.946625	0.364044	1.24997	-0.986214	0.0681215	-0.382261	0.992742	2	-0.986214	2	0.478134	-0.986214	-0.986214
UBB--NM-018955--chr17--+	-0.676653	-0.0605733	-1.20721	0.20129	0.225083	-1.20721	-1.20721	-0.533192	-1.20721	-0.316656	-1.20721	-1.20721	1.67528	0.206652	0.809665	-1.20721	-1.20721	-1.20721	1.10085	-0.0814744	0.479249	0.487724	-0.857086	1.9068	0.165456	-0.119857	0.283467	0.199618	-1.20721	0.450119	1.69509	0.650462	1.30154	-0.248147	-0.37332	-0.0687768	0.499948	0.667319	0.656897	-0.580385	-0.328304	-1.20721	-0.325729	0.970564	-0.256962	0.702451	0.0134857	-1.20721	1.69808
UBC--NM-021009--chr12---	-0.877135	-0.385341	-1.65866	-1.12808	-0.913015	-1.65866	-0.44872	-0.694135	-1.19948	-0.904081	-0.332408	-0.277856	-1.65866	-1.65866	0.451597	-1.65866	-0.353638	-1.65866	-1.65866	0.038761	-0.0514706	-1.21493	-0.744145	-0.380122	-0.120032	-1.65866	-0.999814	-0.755363	-0.357116	-1.65866	0.0884933	-0.643403	-0.526598	-0.353047	-0.499589	-1.65866	-0.573783	0.249854	-1.65866	-1.12754	-0.44635	-1.23207	0.0407164	-0.723558	-0.853501	-1.65866	-0.885759	-1.65866	-1.65866
UBD--NM-006398--chr6---	-0.0284776	-0.656313	-0.656313	-0.656313	-0.656313	-0.656313	-0.656313	0.141288	-0.656313	-0.656313	-0.656313	-0.656313	-0.656313	-0.656313	0.292647	-0.656313	-0.656313	-0.656313	-0.656313	-0.656313	-0.656313	-0.656313	0.0940875	-0.656313	-0.656313	0.100485	-0.656313	-0.656313	-0.656313	-0.656313	-0.656313	-0.656313	-0.656313	-0.656313	-0.656313	-0.656313	-0.656313	0.200434	-0.656313	-0.656313	-0.656313	-0.0605385	-0.0596795	-0.656313	-0.656313	-0.656313	-0.656313	-0.656313	-0.656313
UBL5--NM-001048241--chr19--+	-0.182777	0.00974007	-0.86776	1.61263	-0.86776	-0.86776	-0.0452042	1.43015	-0.168099	-0.86776	-0.86776	1.23619	1.77211	-0.86776	0.167577	-0.86776	1.12072	-0.86776	-0.86776	-0.86776	0.397375	-0.191646	0.259433	1.08036	0.328267	-0.0420759	0.493544	-0.86776	0.0345861	-0.86776	1.7944	0.286203	2	-0.86776	0.898332	0.602034	0.237407	1.08473	-0.86776	-0.058489	0.655589	0.26883	-0.216819	1.37132	0.359073	2	-0.191285	-0.86776	1.24116
UBXN1--NM-001286077--chr11---	-0.496796	0.756985	-0.496796	-0.496796	-0.496796	-0.496796	-0.496796	-0.496796	-0.496796	-0.496796	-0.496796	-0.496796	-0.496796	-0.496796	-0.496796	-0.496796	-0.496796	-0.496796	-0.496796	-0.496796	-0.496796	-0.496796	-0.496796	-0.496796	0.0381695	0.682949	-0.496796	-0.496796	-0.496796	-0.496796	-0.496796	-0.496796	-0.496796	-0.496796	-0.496796	-0.496796	-0.0105936	1.41201	-0.496796	-0.496796	-0.496796	-0.496796	-0.496796	1.53901	0.217079	2	0.469758	-0.496796	-0.496796
UBXN4--NM-014607--chr2--+	0.368938	0.623898	-0.538216	-0.538216	-0.538216	-0.538216	-0.538216	0.614231	-0.538216	-0.538216	0.685858	-0.538216	-0.538216	-0.538216	-0.538216	-0.538216	-0.538216	-0.538216	2	-0.538216	0.809144	-0.538216	0.0604284	-0.538216	0.373409	0.555276	0.211211	-0.538216	0.656803	-0.538216	2	-0.538216	-0.538216	-0.538216	0.887585	-0.538216	0.295982	1.06578	-0.538216	0.53354	-0.538216	-0.538216	0.323855	-0.538216	-0.538216	-0.538216	0.357671	-0.538216	-0.538216
UGP2--NM-001001521--chr2--+	1.99733	-0.579628	-0.579628	1.26566	-0.579628	-0.579628	0.521725	0.585518	0.357175	0.959837	-0.579628	1.19191	-0.579628	1.86446	1.70714	-0.579628	-0.579628	2	2	0.570731	-0.0426606	0.325648	0.0256125	2	0.342042	1.30004	-0.579628	-0.579628	0.628559	-0.579628	2	1.49166	1.72996	-0.579628	-0.579628	-0.579628	0.900124	0.863539	2	-0.579628	1.46004	0.942198	0.291942	1.32813	-0.579628	-0.579628	1.53054	-0.579628	-0.579628
UGT2B10--NM-001290091--chr4--+	0.2578	-0.640418	2	1.74414	2	-0.640418	1.7771	1.28675	0.950744	2	1.39037	-0.640418	-0.640418	-0.640418	0.71722	-0.640418	-0.640418	-0.640418	-0.640418	0.486195	1.80086	-0.640418	-0.0476708	-0.640418	1.20535	0.442303	1.14466	1.16441	-0.640418	-0.640418	-0.640418	1.81677	0.73302	-0.640418	-0.640418	0.500795	1.30944	0.382749	-0.640418	-0.640418	2	0.211932	0.213161	-0.640418	1.94793	-0.640418	0.903877	-0.640418	2
UGT2B15--NM-001076--chr4---	1.61137	-0.597059	-0.597059	2	-0.597059	-0.597059	1.9603	-0.597059	0.37348	-0.597059	1.5512	2	-0.597059	-0.597059	-0.597059	-0.597059	-0.597059	-0.597059	-0.597059	-0.597059	0.814202	1.0358	0.029977	-0.597059	1.06202	-0.597059	1.71008	-0.597059	-0.597059	-0.597059	-0.597059	-0.597059	0.855829	-0.597059	-0.597059	0.61017	0.626388	-0.00207306	-0.597059	-0.597059	1.51606	0.97957	-0.597059	1.3794	0.0960046	-0.597059	1.03657	-0.597059	-0.597059
UGT2B7--NM-001074--chr4--+	1.58337	0.608529	-0.588615	0.514327	2	-0.588615	1.32026	1.41639	0.365909	-0.588615	0.672356	-0.588615	2	-0.588615	-0.588615	-0.588615	-0.588615	-0.588615	2	-0.588615	0.799358	1.0173	0.949177	2	1.04308	1.3266	0.780966	0.512678	0.642425	-0.588615	2	0.985698	-0.588615	-0.588615	0.880163	0.598693	0.270728	-0.00344703	-0.588615	-0.588615	0.296531	0.298163	1.93777	-0.588615	-0.588615	-0.588615	2	-0.588615	-0.588615
UQCR10--NM-013387--chr22--+	-0.792404	0.12794	1.58128	2	0.399219	1.86602	-0.792404	2	-0.792404	-0.792404	0.83189	1.99739	-0.792404	-0.792404	-0.792404	-0.792404	-0.792404	-0.792404	-0.792404	0.731959	0.274647	0.442193	1.13403	-0.792404	0.683906	-0.792404	0.260506	0.651164	0.153999	-0.792404	1.99973	0.830087	1.01675	-0.792404	1.59301	-0.792404	0.366722	0.731762	1.73179	0.654341	-0.792404	0.39968	0.401212	0.701992	0.494329	-0.792404	-0.0829004	-0.792404	-0.792404
UQCR11--NM-006830--chr19---	-0.285105	-0.111707	1.13635	0.339238	-0.316864	2	-0.902057	1.6895	-0.271884	-0.902057	-0.0695687	1.88284	1.47563	0.742043	1.44326	-0.902057	0.888932	-0.902057	2	0.406997	-0.241431	1.06889	1.21978	1.71234	-0.282065	1.08971	0.00213466	-0.902057	-0.902057	-0.902057	2	0.491264	2	0.213182	1.14643	0.421762	-0.334722	0.690196	-0.902057	-0.902057	1.01176	-0.902057	0.473676	0.381262	1.21368	2	-0.292767	-0.902057	-0.902057
UQCRB--NM-006294--chr8---	0.153245	-1.16284	0.708033	0.887591	0.0978941	0.932462	-0.00618617	-0.443481	-0.584458	-1.16284	-0.398771	1.93258	-1.16284	-1.16284	-1.16284	-1.16284	0.480949	-1.16284	-1.16284	0.719146	0.0646792	-0.603923	0.355524	1.76401	0.555979	0.665229	-0.0375081	-0.495526	-0.416907	-1.16284	-1.16284	0.999474	1.51468	-1.16284	1.32602	-1.16284	-0.433741	1.48865	0.826667	-1.16284	0.364171	-0.223268	0.0998233	0.0150052	0.631392	-1.16284	-1.16284	-1.16284	0.580512
UQCRH--NM-006004--chr1--+	-0.105378	0.0759613	-0.750588	1.58578	-0.750588	-0.750588	0.0242073	0.63374	-0.750588	-0.750588	-0.750588	1.75489	1.736	-0.750588	1.70215	-0.750588	-0.750588	-0.750588	-0.750588	0.0586831	1.00303	-0.113731	0.561963	-0.750588	-0.750588	-0.750588	0.195018	-0.750588	-0.750588	-0.750588	-0.750588	0.336372	1.7224	-0.750588	1.39173	-0.750588	-0.430061	1.52904	-0.750588	-0.750588	0.68431	-0.138326	0.321383	-0.750588	0.0942859	-0.750588	-0.750588	-0.750588	1.23588
UQCRQ--NM-014402--chr5--+	0.334832	-0.244366	2	2	0.280558	1.96259	-0.95564	1.89202	0.0279218	0.98302	0.990216	1.55063	-0.95564	0.523966	1.65068	-0.95564	1.43718	-0.95564	-0.95564	-0.259234	0.80924	0.321265	1.86424	0.623449	0.944678	0.836852	1.37375	0.80735	0.651863	2	2	1.7209	2	-0.95564	1.71561	0.606826	0.925288	1.11458	2	0.162455	1.13873	0.280995	-0.0331718	0.85929	1.42273	1.04282	0.321817	-0.95564	0.753784
USMG5--NM-001206426--chr10---	0.683569	-0.675251	1.90721	0.897348	0.066131	-0.675251	0.263348	1.00175	1.55621	-0.675251	-0.675251	2	-0.675251	-0.675251	-0.675251	-0.675251	1.59376	-0.675251	-0.675251	0.305113	1.01916	-0.675251	0.610963	1.54771	-0.248017	-0.675251	-0.675251	0.245874	0.354395	2	2	0.0791957	1.29304	-0.675251	1.91998	-0.675251	0.0435063	0.554651	2	0.24819	0.0650879	0.0664529	0.623352	-0.675251	0.348243	-0.675251	-0.675251	-0.675251	1.73119
UXT--NM-004182--chrX---	-0.538404	0.597592	-0.538404	-0.538404	0.302713	-0.538404	-0.538404	-0.538404	-0.538404	-0.538404	0.658159	-0.538404	-0.538404	-0.538404	0.801924	-0.538404	-0.538404	-0.538404	-0.538404	-0.538404	0.778674	-0.538404	1.26554	-0.538404	-0.0536952	-0.538404	0.761221	-0.538404	-0.538404	-0.538404	-0.538404	-0.538404	-0.538404	-0.538404	-0.538404	-0.538404	-0.538404	1.02955	2	-0.538404	0.30153	-0.538404	0.304292	1.30615	0.622777	-0.538404	-0.538404	-0.538404	-0.538404
VAMP5--NM-006634--chr2--+	0.357833	-0.520599	2	0.51617	-0.520599	2	-0.520599	2	-0.520599	-0.520599	0.664718	-0.520599	-0.520599	-0.520599	-0.520599	-0.520599	2	-0.520599	-0.520599	-0.520599	0.784101	-0.520599	-0.520599	-0.520599	-0.520599	0.53827	0.2051	-0.520599	2	-0.520599	-0.520599	-0.520599	-0.520599	-0.520599	0.860057	-0.520599	-0.0842125	-0.230467	-0.520599	-0.520599	-0.520599	-0.520599	0.314177	1.30662	-0.520599	-0.520599	0.346922	-0.520599	-0.520599
VAMP8--NM-003761--chr2--+	-0.701575	-0.701575	-0.701575	0.12863	-0.0343702	-0.701575	-0.701575	0.807633	-0.701575	-0.701575	-0.701575	-0.701575	2	-0.701575	-0.701575	-0.701575	1.34041	-0.701575	2	-0.701575	0.0516341	-0.00726693	-0.701575	-0.701575	-0.701575	0.146328	-0.120463	-0.701575	-0.701575	-0.701575	2	-0.701575	1.58508	-0.701575	1.11204	-0.701575	-0.352133	0.790742	1.76988	-0.701575	-0.0353089	-0.701575	-0.701575	0.761595	0.219516	-0.701575	-0.701575	-0.701575	-0.701575
VIM--NM-003380--chr10--+	-0.659587	-0.659587	-0.659587	-0.659587	-0.659587	-0.659587	-0.659587	-0.659587	-0.659587	-0.659587	-0.659587	-0.659587	-0.659587	-0.659587	-0.659587	-0.659587	-0.659587	-0.659587	-0.659587	0.0673525	-0.659587	-0.659587	-0.659587	-0.659587	-0.659587	-0.659587	-0.659587	-0.659587	-0.659587	-0.659587	-0.659587	-0.659587	-0.659587	-0.659587	-0.659587	-0.659587	-0.659587	-0.29667	-0.659587	-0.659587	-0.659587	-0.659587	-0.108821	-0.659587	-0.236847	-0.659587	-0.659587	-0.659587	-0.659587
VPS28--NM-016208--chr8---	-0.556207	-0.556207	-0.556207	-0.556207	-0.556207	-0.556207	-0.556207	-0.556207	-0.556207	-0.556207	-0.556207	-0.556207	-0.556207	-0.556207	-0.556207	-0.556207	-0.556207	-0.556207	-0.556207	-0.556207	-0.0582321	-0.556207	0.00508314	1.8628	0.634191	-0.556207	-0.556207	-0.556207	0.564245	-0.556207	-0.556207	0.264775	-0.556207	-0.556207	-0.556207	-0.556207	-0.133672	1.51558	-0.556207	-0.556207	-0.556207	0.855109	-0.556207	-0.556207	0.55755	-0.556207	-0.556207	-0.556207	-0.556207
VTN--NM-000638--chr17---	1.44272	0.937186	1.9572	0.651523	1.20539	1.25922	0.737826	0.324917	1.1945	0.757503	0.810927	0.45364	1.33351	0.899968	0.15925	1.74421	0.852893	0.540016	1.33909	1.33559	1.17939	1.34332	0.853477	2	1.47521	1.24645	1.10512	0.579566	0.462851	1.94304	0.455066	0.606804	2	-0.522931	0.464614	0.804998	1.1689	1.13617	2	0.895457	1.35037	0.920074	1.20761	0.180524	0.841461	1.5518	1.04554	0.110298	1.53755
VWF--NM-000552--chr12---	-0.264521	-0.264521	-0.264521	-0.264521	-0.264521	-0.264521	-0.264521	-0.264521	-0.264521	-0.264521	-0.264521	-0.264521	-0.264521	-0.264521	-0.264521	-0.264521	-0.264521	-0.264521	-0.264521	-0.264521	-0.264521	-0.264521	-0.264521	-0.264521	-0.264521	-0.264521	-0.264521	-0.264521	-0.264521	-0.264521	-0.264521	-0.264521	-0.264521	-0.264521	-0.264521	-0.264521	0.222044	-0.264521	-0.264521	-0.264521	-0.264521	-0.264521	-0.264521	-0.264521	-0.264521	-0.264521	-0.264521	-0.264521	-0.264521
WDR83OS--NM-016145--chr19---	-0.588374	-0.588374	2	-0.588374	-0.588374	-0.588374	-0.588374	1.20045	0.26323	0.811081	-0.588374	1.97248	-0.588374	-0.588374	-0.588374	-0.588374	-0.588374	2	-0.588374	-0.588374	0.304384	0.23457	-0.588374	-0.588374	0.249472	-0.588374	0.100402	-0.588374	-0.588374	-0.588374	2	-0.588374	-0.588374	-0.588374	-0.588374	-0.588374	0.178312	0.885813	-0.588374	-0.588374	0.201332	-0.588374	0.203929	-0.588374	0.503369	-0.588374	0.235009	-0.588374	-0.588374
XCL2--NM-003175--chr1---	-0.224052	-0.224052	-0.224052	-0.224052	-0.224052	-0.224052	-0.224052	-0.224052	-0.224052	-0.224052	-0.224052	-0.224052	-0.224052	-0.224052	-0.224052	-0.224052	-0.224052	-0.224052	-0.224052	-0.224052	-0.224052	-0.224052	-0.224052	-0.224052	-0.224052	-0.224052	-0.224052	-0.224052	-0.224052	-0.224052	-0.224052	-0.224052	-0.224052	-0.224052	-0.224052	-0.224052	-0.224052	-0.224052	-0.224052	-0.224052	-0.224052	-0.224052	-0.224052	-0.224052	-0.224052	-0.224052	-0.224052	-0.224052	-0.224052
XRCC5--NM-021141--chr2--+	-0.58736	-0.58736	-0.58736	-0.58736	-0.58736	-0.58736	-0.58736	-0.58736	-0.58736	-0.58736	0.541215	-0.58736	-0.58736	-0.58736	-0.58736	-0.58736	-0.58736	-0.58736	-0.58736	-0.58736	-0.58736	0.238192	-0.58736	-0.58736	-0.58736	-0.58736	0.103599	-0.58736	0.514427	-0.58736	-0.58736	-0.58736	0.691524	-0.58736	-0.58736	-0.58736	0.181756	0.365367	-0.58736	-0.58736	-0.58736	-0.58736	-0.58736	-0.58736	-0.58736	-0.58736	-0.58736	-0.58736	-0.58736
YWHAB--NM-139323--chr20--+	0.253806	-0.562878	-0.562878	-0.562878	-0.562878	-0.562878	-0.562878	0.474635	-0.562878	-0.562878	-0.562878	-0.562878	-0.562878	-0.562878	-0.562878	-0.562878	-0.562878	-0.562878	-0.562878	-0.562878	0.65011	0.243233	-0.562878	-0.562878	0.25783	-0.562878	0.111809	0.399572	-0.562878	-0.562878	-0.562878	-0.562878	0.685888	-0.562878	-0.562878	-0.562878	0.188125	0.367412	-0.562878	-0.562878	0.210675	-0.562878	-0.562878	-0.562878	-0.562878	-0.562878	1.31614	-0.562878	-0.562878
ZFAND2A--NM-182491--chr7---	-0.319273	-0.319273	-0.319273	-0.319273	-0.319273	-0.319273	-0.319273	-0.319273	-0.319273	-0.319273	-0.319273	1.30574	-0.319273	-0.319273	-0.319273	-0.319273	-0.319273	-0.319273	-0.319273	-0.319273	-0.319273	-0.319273	0.235908	-0.319273	-0.319273	-0.319273	-0.319273	-0.319273	-0.319273	-0.319273	-0.319273	-0.319273	-0.319273	-0.319273	-0.319273	-0.319273	-0.319273	-0.0414073	-0.319273	-0.319273	-0.319273	-0.319273	-0.319273	-0.319273	-0.319273	-0.319273	-0.319273	-0.319273	-0.319273
ZFP36--NM-003407--chr19--+	-0.700434	0.146174	-0.700434	-0.700434	-0.700434	-0.700434	-0.700434	0.139131	-0.0254049	-0.700434	-0.700434	-0.700434	-0.700434	-0.700434	0.298454	-0.700434	-0.700434	-0.700434	-0.700434	-0.700434	-0.700434	-0.700434	0.0894473	-0.700434	-0.700434	-0.700434	-0.700434	-0.700434	-0.700434	-0.700434	-0.700434	-0.700434	-0.700434	-0.700434	-0.700434	-0.700434	-0.372129	0.588477	-0.700434	-0.700434	-0.700434	-0.700434	0.773226	0.674234	-0.700434	-0.700434	-0.700434	-0.700434	-0.700434
ZGPAT--NM-181485--chr20--+	0.462009	1.61259	-0.528839	1.46473	2	-0.528839	2	-0.528839	-0.528839	-0.528839	0.808168	-0.528839	-0.528839	-0.528839	-0.528839	-0.528839	-0.528839	-0.528839	-0.528839	-0.528839	-0.528839	1.17391	1.10168	-0.528839	0.857916	1.50187	-0.528839	0.638862	2	-0.528839	2	0.427565	1.96634	-0.528839	-0.528839	2	0.746976	-0.201578	-0.528839	-0.528839	-0.528839	0.411411	1.68064	1.53222	0.768633	-0.528839	0.449703	2	-0.528839
ZNHIT1--NM-006349--chr7--+	0.114063	1.04013	-0.68344	0.92112	0.639344	-0.68344	-0.68344	-0.68344	1.20222	0.655193	-0.68344	0.856987	-0.68344	-0.68344	-0.68344	-0.68344	2	-0.68344	-0.68344	0.316848	0.789516	0.687047	1.21162	1.5847	-0.247523	-0.68344	-0.0245992	-0.68344	-0.68344	-0.68344	2	0.0863396	1.32485	0.758173	0.570018	0.329811	0.60327	0.571458	2	0.922547	1.09015	0.639856	-0.68344	-0.68344	0.360855	2	0.104158	-0.68344	2
[truncated: 398 more columns]
