# Supplementary material for: Long-read single-cell sequencing reveals expressions of hypermutation clusters of isoforms in human liver cancer cells
Source: eLife. 2024 Jan 11;12:RP87607. doi: 10.7554/eLife.87607 (PMC10945587; doi:10.7554/eLife.87607)
Supplement: Supplementary file 10. [file elife-87607-supp10.xlsx]

## Sheet: in
Supplemental table 10: Isoforms with SD>=1.0
Cell	N_AAAGGATGTGTACAGG	N_AACCTTTCAGAAGCGT	N_AACGTCACAGAGACTG	N_AAGACTCAGGGAGAAT	N_AAGCGTTAGGTGCGAT	N_AATGGAAGTATAGGGC	N_AATGGCTTCCCGAACG	N_ACACTGAGTATTCCGA	N_ACACTGATCACTGGTA	N_ACCTACCAGCTGACTT	N_ACCTGTCCAAAGAGTT	N_ACGGAAGAGCAAACAT	N_ACGTACACATCAGCAT	N_ACGTACATCGCAACAT	N_ACGTAGTAGGCCCAAA	N_AGAAATGAGGGCGAGA	N_AGAACAATCGCGCTGA	N_AGACAAAGTATTGCCA	N_AGCGTCGCAGTTGGTT	N_AGGAGGTGTTAGCTAC	N_AGGCATTAGTAAGCAT	N_AGGGTCCCACGGCGTT	N_AGTCAACTCCTCTGCA	N_ATACCTTTCCGGGACT	N_ATAGAGATCAGTCAGT	N_ATCCGTCAGAAACACT	N_ATCTTCAGTTCCCACT	N_ATGCCTCGTGTGTCGC	N_ATGCCTCTCATGCCAA	N_ATTCAGGTCGCTGTTC	N_CAACAGTCACCCTAAA	N_CAACAGTCACCTCGTT	N_CAACAGTTCGATGCTA	N_CAACGATTCCGGACGT	N_CAAGAGGCAATAGTCC	N_CAATTTCGTGGACTGA	N_CAATTTCTCATCCCGT	N_CACACAACACGAAGAC	N_CACGAATTCATCGCTC	N_CACTGTCCAGTCTTCC	N_CAGATACCAAGTAGTA	N_CAGATACGTTAGCTAC	N_CAGATACTCGGCTGAC	N_CAGATTGGTGAAGCGT	N_CAGGTATAGAGAGCAA	N_CATAAGCCACTTACAG	N_CATCCACAGATCACCT	N_CATGAGTCATTGGATC	N_CATTCATAGAACTCCT
Group	Normal	Normal	Normal	Normal	Normal	Normal	Normal	Normal	Normal	Normal	Normal	Normal	Normal	Normal	Normal	Normal	Normal	Normal	Normal	Normal	Normal	Normal	Normal	Normal	Normal	Normal	Normal	Normal	Normal	Normal	Normal	Normal	Normal	Normal	Normal	Normal	Normal	Normal	Normal	Normal	Normal	Normal	Normal	Normal	Normal	Normal	Normal	Normal	Normal
Cluster	A	A	A	A	A	A	A	A	A	A	A	A	A	A	A	A	A	A	A	A	A	A	A	A	A	A	A	A	A	A	A	A	A	A	A	A	A	A	A	A	A	A	A	A	A	A	A	A	A
A2M--NM-000014--chr12---	1.40308	0.500484	2	0.556652	0.545497	1.86125	0.932344	0.513627	-0.713256	0.735808	1.57574	1.5589	1.16602	0.299255	-1.51382	-1.51382	-1.51382	-1.51382	0.782659	0.505069	1.24465	1.17721	0.507273	1.2323	0.728716	0.0251607	1.00316	0.828436	-0.132962	-1.51382	1.93279	0.307478	1.73545	0.247936	1.37005	0.489753	0.564297	0.171292	0.161924	0.557969	0.134858	1.035	-0.0308393	0.0452198	1.09628	0.937054	1.45025	-0.0283466	-0.0454105
ACTB--NM-001101--chr7---	-0.460645	-1.40574	-1.40574	-0.925821	-1.40574	-0.917448	0.302333	0.204831	-0.723205	-0.486395	-0.156769	-1.40574	-1.40574	-1.40574	-1.40574	0.346675	-1.40574	-1.40574	-0.272996	-0.801795	-0.470581	-0.439497	0.317385	-0.456874	-1.40574	-0.390185	-0.263256	-0.588686	-0.505351	-1.40574	-1.40574	-1.01325	-0.0838796	-1.40574	-0.766634	-0.533225	-0.424443	0.947821	0.643054	-0.586888	-0.732132	-0.307641	-0.499008	-0.559918	-0.677455	-1.40574	-1.00417	-0.13927	-1.40574
AGXT--NM-000030--chr2--+	1.63637	1.65093	2	1.86786	0.94018	1.11304	0.494431	0.774966	0.557824	0.307198	-0.16428	-1.05832	1.54238	0.701211	-1.05832	1.69587	-1.05832	2	1.956	1.20325	0.988724	0.0415418	2	1.64306	1.74215	0.0976728	0.88355	0.616004	0.748811	0.387541	1.47366	1.17295	2	-0.22163	0.976112	1.43261	0.720947	0.529349	0.567935	0.796119	1.243	1.70068	1.49451	1.58882	1.22808	1.32017	0.868586	-1.05832	0.366724
AHSG--NM-001622--chr3--+	1.7673	1.49193	1.30325	1.59563	0.90796	0.809588	1.21886	0.756771	0.293546	0.345208	1.60916	1.79328	0.713552	0.482754	0.185985	1.07917	-1.58091	1.84422	1.31393	1.42899	0.496278	0.680616	1.401	1.7737	0.450987	0.338336	1.46878	0.619445	0.926506	1.5643	0.652927	1.29697	1.82716	-0.394931	1.77477	1.219	1.19663	0.763796	0.476589	-0.101174	1.31203	1.01171	1.5866	0.573422	0.99523	1.82801	0.781511	0.674069	1.37254
ALDOB--NM-000035--chr9---	1.33109	0.81779	1.71889	1.8541	1.41848	0.901694	1.9493	1.47214	0.409341	1.52585	2	-1.37906	0.185766	0.589863	0.306718	1.49932	-1.37906	-1.37906	1.27624	0.524609	1.74575	1.75661	0.907691	1.52305	1.64073	0.452075	1.18404	1.30526	1.01324	0.777006	0.752225	1.20504	1.87255	0.0600946	1.99113	1.04181	1.48194	0.821126	1.96934	0.43086	1.57996	1.38327	1.14236	0.676369	1.83971	0.0232843	0.747422	-0.165597	1.25401
AMBP--NM-001633--chr9---	1.49745	0.953939	1.72842	0.418977	1.34086	0.630096	0.661226	1.0867	0.607926	0.788207	0.668889	2	0.917882	0.701867	-0.01366	1.79618	0.602026	2	1.36575	1.42923	0.708017	0.645387	2	1.02825	1.28597	0.809089	0.685581	0.875414	0.0564983	1.54883	2	0.911307	1.89321	-0.0208771	0.810846	0.0100139	1.22635	1.542	1.42325	0.420305	0.91275	0.521538	1.2696	0.61346	0.679338	1.82326	0.708707	0.0961288	1.17278
APOA1--NM-000039--chr11---	1.53978	0.90234	2	0.283092	0.51993	1.00146	0.79843	1.0683	1.18861	0.220631	1.29994	2	0.2874	0.51731	0.614931	2	0.527907	1.97262	1.38583	1.65015	1.28212	1.08574	2	1.52816	1.4415	-0.248255	1.14975	1.21211	0.198887	1.68634	2	0.433279	2	0.387937	0.46565	0.570297	2	0.774304	2	0.86519	0.769783	0.84171	0.968856	0.536064	0.566379	1.95979	1.34528	0.173101	1.44104
APOA2--NM-001643--chr1---	0.913398	0.0782935	2	1.98778	0.525814	0.459668	1.34397	0.657455	0.425279	0.389471	1.96428	1.35291	-0.0043078	0.518761	-0.358583	1.88867	-2	1.96129	0.997548	1.17788	0.886495	1.05119	2	1.09763	0.997407	0.221191	1.57857	0.831113	-0.126452	1.78652	2	0.795786	2	-1.37662	1.92079	0.664897	0.902116	0.554889	2	-0.140707	0.70397	0.804706	0.350191	0.688996	0.783504	1.34242	0.687135	-0.269963	1.48859
APOB--NM-000384--chr2---	1.25688	0.483204	0.578504	1.29699	0.737821	1.32006	1.39607	1.04453	1.40505	1.71485	1.17019	-1.46527	0.637021	0.361378	0.380218	1.0727	-1.46527	0.390212	1.3124	1.10453	1.18476	1.62353	1.03813	1.59372	0.861522	1.16428	1.88593	0.0776076	0.368846	-0.132919	-1.46527	1.65824	1.07565	0.589806	1.39819	1.02045	1.55678	0.983731	0.683749	1.67996	1.7404	1.55876	0.954497	-0.0710531	0.760569	0.0699337	2	-1.46527	-0.152102
APOC1--NM-001645--chr19--+	0.892185	0.193952	2	1.96064	0.784537	0.669177	1.62166	0.867429	-0.0761152	0.25314	1.8588	1.1059	0.434274	0.619669	-0.831698	1.57419	-2	1.23364	0.744062	0.953728	0.982398	1.89392	1.75218	1.30628	1.22666	0.343128	1.24029	0.887506	0.385753	1.465	2	1.37841	2	-0.837113	1.65709	0.782996	1.01047	0.944879	1.52231	-0.19548	1.08101	0.909404	1.15559	0.693163	1.45731	0.898327	0.449399	0.192919	1.09341
APOC2--NM-000483--chr19--+	0.896787	0.230445	2	1.80031	0.874534	0.682257	1.83067	0.312478	1.02782	0.184092	1.76272	1.78691	-0.189884	0.602069	-1.67457	1.81532	0.429956	1.89939	1.30934	1.26154	0.276319	1.06513	1.78233	1.32421	1.07527	0.19571	1.41423	0.823228	-0.0849832	1.79074	2	0.439295	2	-1.00636	1.48526	0.805416	1.25855	1.00817	1.36921	0.0426577	0.67031	0.758156	0.759762	0.439537	1.04498	1.41128	0.882573	0.0131745	1.68576
APOC3--NM-000040--chr11--+	1.14789	0.539462	2	1.95604	1.05053	0.829906	1.31401	1.05965	0.7125	0.986997	1.83712	1.48989	0.211161	0.445897	0.319857	2	-0.0686033	1.77659	1.5746	1.19151	1.24157	1.01781	1.75713	1.29325	1.33228	0.306451	1.46204	0.769235	0.430081	0.886725	2	1.30529	2	-0.200361	1.72617	1.00157	1.60447	0.924079	1.45107	0.325763	1.17133	1.1415	0.977375	0.323185	1.11773	1.65179	0.485793	-0.402592	1.6018
APOH--NM-000042--chr17---	1.39471	0.776508	1.61447	0.726614	0.756045	0.981431	0.764678	1.11509	1.10653	0.257859	0.782255	1.45297	-0.427505	0.521223	-0.290031	0.117306	1.58022	1.24347	0.811932	1.27543	0.987388	0.42145	2	1.07284	1.66384	0.712102	1.13146	0.844917	0.112794	1.74318	2	0.515804	2	-0.919993	1.26728	0.892352	1.56119	1.11216	2	0.445969	0.971693	0.891624	0.893577	0.77982	0.58754	2	1.14382	-0.184248	1.60001
AZGP1--NM-001185--chr7---	1.48907	1.21428	1.3249	0.526311	1.31559	1.53421	1.20262	0.913497	0.979274	0.413142	-0.0911811	2	0.941029	0.186957	-1.0475	-1.0475	-1.0475	2	1.18488	1.37162	0.870708	0.540959	1.05054	1.54414	1.41603	1.07561	1.23169	-0.0526705	0.657757	0.499082	2	1.85798	2	-1.0475	-1.0475	0.0148584	1.51147	0.798541	0.692043	0.74657	1.3137	0.82232	0.824074	0.570896	0.043106	1.49669	0.871369	0.494528	-1.0475
B2M--NM-004048--chr15--+	-0.659939	-0.746578	0.234144	-0.827217	-1.45137	-1.63935	-0.754977	-0.63878	-1.01265	-1.20409	-0.537978	-0.549999	-1.03822	0.191388	-2	0.0218744	-2	1.06607	-1.61741	-0.743032	-0.820696	-0.335832	-0.0100732	-0.655054	-0.465591	0.193918	-0.60547	-1.64853	-0.718205	-0.849799	-0.536637	-0.564464	-0.190876	-2	-0.327678	-0.976944	-0.741435	-0.296056	-0.0636109	-1.04149	-0.858717	-1.02359	-1.45024	0.373367	-0.535836	-2	-0.989563	-2	-0.275395
C3--NM-000064--chr19---	1.51728	1.08825	1.11868	1.57993	1.20386	1.00307	0.156011	1.58178	1.12688	0.828831	0.989076	0.0100395	0.986795	-0.0120537	0.209181	0.892824	0.784524	0.91204	1.37226	1.55095	1.57188	0.996955	0.563742	0.997716	0.367103	0.882698	1.1167	0.340395	0.197954	1.63044	0.69067	1.13208	1.08931	1.01815	0.565794	0.925198	1.09504	1.12927	-0.133299	0.0742873	1.552	1.62003	1.45059	0.387352	1.04364	-0.097145	1.85095	0.309766	1.4327
CALM1--NM-006888--chr14--+	-0.539046	-1.02522	0.581096	0.265458	-0.564073	-0.441402	-0.407586	0.900415	-1.02522	-1.02522	-1.02522	-1.02522	-1.02522	0.186977	-1.02522	-1.02522	-1.02522	-1.02522	0.329116	0.028717	0.0928794	-0.444136	1.03499	0.232622	-0.439182	-1.02522	0.340762	-1.02522	-0.38477	-1.02522	-1.02522	-0.555947	1.073	-1.02522	0.589039	-0.407522	-0.578146	0.48029	0.682955	-0.0461791	-1.02522	-0.563873	-0.563208	-1.02522	-0.154462	-1.02522	0.528521	-1.02522	0.471608
CD63--NM-001780--chr12---	-1.07939	-1.07939	1.12954	-0.151896	-1.07939	-1.07939	-1.07939	-1.07939	-0.305612	-1.07939	0.336547	-1.07939	0.149081	0.673029	-1.07939	-1.07939	1.54511	-1.07939	-0.101267	-0.394707	-0.0192162	-0.320802	0.231679	0.113287	-1.07939	1.95845	-1.07939	-1.07939	-0.472122	1.03044	-1.07939	-0.0383016	0.687497	-1.07939	-1.07939	-0.493695	0.0330905	0.639452	-1.07939	-1.07939	-1.07939	-1.07939	-0.313495	1.11029	-0.743148	-1.07939	-1.07939	-1.07939	0.339893
CD74--NM-001025158--chr5---	-0.568572	-0.568572	-0.568572	0.0228432	-0.568572	-0.568572	0.0680158	-0.568572	-0.568572	-0.568572	-0.568572	-0.568572	-0.568572	0.18882	-0.568572	-0.568572	-0.568572	-0.568572	-0.568572	-0.0320067	-0.568572	-0.237893	-0.568572	-0.294673	-0.568572	-0.568572	-0.568572	-0.568572	-0.568572	-0.568572	-0.568572	-0.568572	-0.568572	-0.568572	-0.568572	-0.568572	-0.568572	-0.568572	-0.568572	-0.568572	-0.568572	-0.568572	-0.568572	1.06941	-0.568572	-0.568572	-0.568572	-0.568572	-0.568572
CFB--NM-001710-5--chr6--+	1.93858	2	1.72137	1.21503	0.827043	1.23875	0.271778	0.686568	0.843617	1.29433	-1.28086	2	-0.0474912	0.891711	-1.28086	0.713739	-1.28086	2	1.19208	1.76944	0.645266	1.12618	1.69555	1.73747	-0.722965	0.703836	1.41358	0.393341	0.709369	0.837377	1.71906	0.618633	1.6891	0.428742	0.753423	1.31721	1.82033	0.529478	1.84672	1.40563	1.59784	1.41217	1.76702	0.917545	0.862267	0.385014	0.979373	-1.28086	1.84701
CYB5A--NM-148923--chr18---	1.16047	-0.332745	2	1.71049	1.00003	0.379126	0.632924	0.781416	-0.561295	-0.285535	1.02564	0.468775	-0.0942504	1.03684	-1.3561	1.46149	-1.3561	0.703809	1.0547	1.25398	0.955631	1.1619	2	1.12253	0.870302	2	0.730545	0.537904	0.0148238	0.123041	2	1.02296	2	-0.500152	0.216118	0.447616	1.21114	1.50879	1.02969	0.359737	0.7987	0.282769	0.568404	0.587531	1.05056	1.07714	0.327728	-1.3561	2
DDT--NM-001084392--chr22---	1.64774	1.08008	2	2	1.25501	0.149362	1.75682	0.172224	0.26522	0.919089	0.919881	1.0914	0.488539	0.92994	-1.22075	1.55151	-1.22075	1.33103	1.24268	0.580705	0.944034	1.38052	0.979006	1.08582	1.42803	1.19044	1.40549	0.481517	1.2153	0.108652	0.433236	1.33735	2	-1.22075	1.86616	0.40037	0.90133	1.26182	0.274517	-0.0900318	0.505377	0.977986	1.19366	1.02443	1.29916	-1.22075	0.428661	0.104738	1.41303
DNAJB1--NM-006145--chr19---	-0.617489	-0.617489	-0.617489	-0.617489	-0.617489	-0.617489	-0.00686508	-0.617489	-0.617489	-0.617489	-0.617489	-0.617489	-0.617489	1.63879	-0.617489	-0.617489	-0.617489	-0.617489	-0.617489	-0.336078	-0.617489	-0.617489	-0.617489	-0.617489	-0.617489	0.933472	-0.617489	-0.617489	-0.617489	-0.617489	-0.617489	-0.617489	-0.617489	-0.617489	-0.617489	-0.617489	-0.378709	-0.617489	-0.617489	-0.617489	-0.617489	-0.617489	-0.617489	0.953687	-0.617489	-0.617489	-0.617489	-0.617489	-0.617489
EEF1A1--NM-001402--chr6---	-0.0721042	-1.2695	-2	0.695156	-1.23868	-0.769825	0.131771	0.41309	-1.00227	-0.63516	-0.456403	-2	-2	-1.57629	-0.246916	-0.919255	-2	1.03041	-0.507098	-0.291242	-0.460568	0.325031	-0.28906	-0.673886	-0.765586	0.385268	-0.963311	-0.0997755	-0.446443	-2	-0.454862	-0.229592	-0.252136	-0.54581	0.304843	-0.961209	-0.690377	1.04335	0.555381	-0.787904	0.147112	-0.823317	0.459493	-0.351805	0.645372	-2	0.0159595	-0.134122	-0.154436
EEF1B2--NM-001959--chr2--+	-0.0268566	-0.538458	-1.16672	0.796865	-0.0747966	0.153241	0.213281	-1.16672	-1.16672	-0.504961	0.339642	-1.16672	-1.16672	0.413394	-1.16672	-1.16672	-1.16672	-1.16672	-1.16672	-0.103564	-0.323936	0.898611	0.228077	-0.480338	-0.575556	0.0581244	-0.761565	-0.181284	-0.520669	0.365258	-1.16672	-0.0591445	-0.416825	-1.16672	0.46166	-0.543619	-0.375455	0.66189	-1.16672	-0.587308	-0.354292	0.157678	-1.16672	-0.146587	-0.288346	0.598505	-1.16672	-1.16672	-1.16672
EIF1--NM-005801--chr17--+	0.159371	-0.581547	-1.87309	0.106391	-1.11677	-0.941669	0.465572	-0.380592	-1.87309	-1.25781	0.792142	-0.11577	-1.87309	0.707561	0.099879	0.0920264	-1.87309	0.861004	-0.905584	-0.0116701	-1.0895	0.699676	0.0591812	-0.0858614	0.711326	0.829229	-0.0641732	-0.664	-1.27241	-0.448706	1.08249	-0.00167426	0.283046	-1.87309	0.32069	0.199376	0.166143	1.17477	-0.270991	-0.954848	-0.85902	-0.151008	-0.01983	-0.00141083	0.565695	0.470076	-0.415834	-1.87309	0.189185
FABP1--NM-001443--chr2---	1.65493	0.486474	2	2	0.569544	0.710147	1.20171	0.544514	0.138571	-0.165196	1.66147	1.50133	0.45022	1.0913	-0.486412	1.21876	0.581075	1.97601	1.44317	2	1.34809	1.04628	1.62664	1.21777	0.794948	0.568559	2	0.474894	0.042573	1.41368	2	0.805297	2	-0.962766	1.83367	1.33017	1.82012	0.785473	1.64281	0.0945656	0.392189	0.722829	0.859901	0.0493796	0.830856	1.19674	0.964874	-0.139975	1.05751
FABP4--NM-001442--chr8---	-0.658271	-0.658271	-0.658271	-0.658271	-0.658271	-0.102411	-0.0702145	-0.658271	0.118707	-0.658271	-0.658271	-0.658271	0.575278	-0.658271	1.34459	-0.658271	-0.658271	-0.658271	-0.658271	-0.658271	-0.658271	-0.105014	-0.658271	0.149971	0.290409	0.0427429	-0.658271	-0.658271	-0.658271	-0.658271	1.14074	-0.658271	-0.658271	-0.658271	-0.658271	-0.0701532	-0.232607	-0.130988	-0.658271	-0.658271	-0.658271	-0.658271	-0.658271	-0.658271	-0.320636	-0.658271	-0.658271	-0.658271	-0.658271
FAU--NM-001997--chr11---	-0.046868	-1.28559	0.0835542	0.549219	-0.312744	-1.78519	0.215019	-0.240508	-0.721622	-1.25895	-0.587313	-0.28219	-1.78519	-0.812804	-1.78519	-0.653055	-1.78519	0.957234	-0.0267399	-0.0785245	-1.115	0.664192	0.90569	-0.0916871	-0.352284	0.928895	0.0101308	-0.225255	-0.921633	-1.78519	1.03307	0.00926551	0.941496	-1.78519	0.572925	-0.948366	-0.132673	0.967917	0.850227	-1.32443	-0.437078	-0.573817	-0.730859	0.272264	0.141273	0.21887	-0.699692	-1.78519	0.628368
FGA--NM-021871--chr4---	1.66849	0.815055	1.31869	1.22216	0.76875	0.965763	0.966206	0.860404	0.987344	0.883074	1.07656	0.636892	0.949594	0.0343554	-0.491636	-0.128588	0.747423	0.875137	1.38193	1.39412	1.19194	1.13823	1.05706	1.84283	0.779208	0.139668	1.59352	0.412622	0.144973	1.10598	1.24261	1.06909	1.77517	0.0195494	0.896356	1.00344	1.39099	0.717677	1.53523	1.46888	0.559319	1.3489	1.2726	0.842056	0.947844	1.47789	1.55799	-0.970106	1.47483
FGB--NM-001184741--chr4--+	1.27805	1.29281	0.884028	1.24384	0.941939	1.12776	0.649071	1.19662	1.22382	1.0917	0.425507	0.730789	0.294366	0.471008	-2	0.441144	1.3187	1.24862	1.42696	1.49922	1.17815	1.19346	1.30034	1.75206	1.13314	0.633026	1.43653	0.808344	0.57518	0.953176	1.00229	1.33067	1.89534	-0.508306	0.527091	0.913652	1.40174	0.784823	1.71178	1.14143	0.686915	1.28277	1.44687	0.409502	1.00335	1.64917	1.4331	0.0135764	1.07919
FGB--NM-005141--chr4--+	1.38014	1.02742	0.231026	0.92483	0.769466	1.24395	1.22537	1.20047	1.60992	1.20422	0.480428	1.14777	1.22777	-1.19167	0.671466	0.66405	-1.19167	0.681555	1.67951	1.61832	1.23034	0.822664	1.33567	2	1.15737	0.197767	2	0.36596	0.942934	1.74491	1.16384	1.5108	1.74187	0.398896	0.238061	0.44858	2	0.935788	0.321241	1.59837	0.296805	1.37504	1.644	1.08001	0.482675	1.44881	2	0.149459	1.16627
FGG--NM-000509--chr4---	1.18201	0.515571	1.26554	0.609546	1.19996	0.931423	0.696136	1.3658	1.4296	1.36948	0.264375	1.02188	-0.461917	0.601659	-1.50864	0.828588	-1.50864	1.25342	1.1104	1.70138	1.772	0.436179	1.2015	2	0.543909	0.175712	1.88723	0.768323	1.04574	0.945818	1.3298	1.2595	1.6347	-1.50864	0.217794	0.780475	1.88524	1.03511	0.858264	1.58478	-0.0270121	1.20048	1.16232	0.35708	0.487722	1.41779	1.46268	-1.50864	1.14589
FGL1--NM-004467--chr8---	1.83382	1.6296	0.687789	1.42932	0.572795	0.328077	0.568105	1.21726	1.13111	0.651455	0.553182	0.998526	0.754271	0.814677	0.462509	0.454164	-1.63421	2	0.699057	0.943001	0.923222	1.44828	1.48214	1.61183	-0.326045	-0.0705762	1.18691	0.118703	-0.231231	1.39389	1.86761	0.701788	1.66711	0.454941	-0.0252307	0.211681	1.63751	1.12544	0.0683779	0.616914	0.0408786	0.777593	0.87134	1.13719	-0.23781	0.109984	1.37734	-1.63421	1.01935
FOS--NM-005252--chr14--+	-0.819424	-0.819424	-0.819424	-0.819424	-0.819424	-0.819424	-0.819424	-0.819424	-0.819424	-0.819424	-0.819424	-0.819424	0.286653	1.41054	-0.819424	-0.819424	-0.819424	-0.819424	-0.819424	-0.374985	-0.819424	-0.819424	-0.819424	-0.819424	-0.819424	2	-0.819424	-0.819424	-0.819424	-0.819424	-0.819424	-0.418795	-0.819424	-0.819424	-0.819424	-0.819424	-0.819424	1.0063	0.638885	-0.819424	-0.819424	-0.819424	-0.424994	1.15209	-0.819424	-0.819424	-0.819424	-0.819424	-0.819424
FTH1--NM-002032--chr11---	0.577069	-1.37371	1.31594	1.73903	0.213622	0.0913227	2	0.11879	-0.752455	0.660019	2	-0.268381	-1.92407	-0.0841805	-1.92407	0.632298	-1.92407	1.42252	0.263219	0.52197	0.343246	1.43545	0.597475	1.02535	-0.0342992	0.724545	0.773262	0.39082	0.434821	1.53784	0.426046	0.716573	1.2849	-1.92407	1.38699	0.160434	-0.272603	1.03078	0.664757	-0.78263	0.509164	0.443624	0.29725	0.842938	0.619731	0.710353	-0.396352	0.0374207	0.979349
FTL--NM-000146--chr19--+	0.131428	-0.691944	0.791497	2	-0.478951	-0.0774533	2	-0.0591075	-0.694651	0.19193	2	0.238239	-1.99303	-0.507395	-1.05828	1.04675	-1.19062	1.24842	-1.14504	-0.0580457	-0.464063	1.04009	0.724494	0.355704	0.0893668	0.73909	-0.40936	0.263893	-0.446364	-0.229277	1.50473	0.585062	1.29274	-1.22468	2	-0.123261	0.194633	0.210231	0.727372	-1.23164	0.0488034	-0.820161	-0.203141	-0.32888	0.143326	0.252472	-0.81946	-1.2725	0.636965
GC--NM-001204307--chr4---	2	1.30064	2	1.04853	0.888182	1.64634	0.412905	0.985128	1.23126	0.486893	0.273156	1.9368	0.739468	-0.0121931	-1.2427	-1.2427	-1.2427	-1.2427	1.26995	1.16868	1.36189	0.83565	0.84863	1.38712	-0.231256	1.4118	0.827801	0.542531	0.186144	0.298934	2	0.641891	1.69735	-0.350591	0.0297366	1.00036	1.21816	1.7014	-1.2427	0.545631	1.21106	1.47719	0.890601	1.36092	-0.155584	1.29335	0.811845	-1.2427	0.989335
GNB2L1--NM-006098--chr5---	-0.061996	-0.24971	1.15425	-0.0838321	-0.539945	-0.317236	0.850188	-0.0386266	-1.60635	-0.960057	-0.6812	1.4794	-1.60635	0.214413	-1.60635	-1.60635	1.1205	-1.60635	-1.60635	-0.304568	-0.273746	0.0409154	0.423313	-0.488683	-0.313353	-0.41013	-0.260622	-0.643945	-0.219638	-0.110174	-1.60635	0.222671	0.831077	-1.60635	0.498882	0.000558459	0.0162329	0.926728	0.0764989	-0.641826	-0.314711	-0.539568	0.0530203	0.668729	0.256065	-1.60635	-1.13334	0.580476	-1.60635
GSTA1--NM-145740--chr6---	0.94815	0.449883	1.93086	1.3529	0.781482	0.705387	1.16036	1.15766	-0.0557995	-0.269436	0.999368	0.460497	1.26917	0.845506	-1.3054	1.67943	1.30328	0.687936	1.5233	1.26256	2	1.41338	2	1.43799	0.71016	1.80152	1.2434	0.944851	-0.290796	0.791714	1.66461	-0.0519155	1.89823	-1.3054	2	0.777181	1.47538	1.28218	2	-0.382676	0.553081	0.280502	0.783778	-0.352284	0.375363	0.343861	0.470482	-1.3054	2
H3F3AP4--NR-002315--chr1--+	0.123092	-0.190538	-1.23568	0.0481478	0.0698351	-1.23568	-0.198109	-0.0922437	-0.423955	-0.142322	0.249694	-1.23568	-1.23568	-0.50474	-1.23568	-1.23568	-1.23568	-1.23568	0.371602	0.301505	-0.123515	-0.916551	-1.23568	0.0154855	-0.652754	1.95113	0.123052	0.299858	-1.23568	-1.23568	0.643786	-0.420991	0.85141	-1.23568	0.0111691	0.125205	-0.455441	1.34802	-1.23568	-0.664341	-0.160206	-0.433256	-0.157323	-0.229761	0.00348905	-1.23568	-0.404246	-1.23568	-1.23568
H3F3B--NM-005324--chr17---	-1.20468	-0.629859	0.277851	-0.301888	-1.20468	-0.665851	-0.241956	-0.746355	-1.20468	-0.190193	-1.20468	-1.20468	-1.20468	1.06291	-1.20468	-1.20468	-1.20468	0.747327	-0.641875	0.0148666	-0.76178	0.338524	0.696764	0.157359	0.00663733	1.2088	-0.833987	-0.675883	-0.211111	-1.20468	-1.20468	-0.448758	-0.0747326	-1.20468	0.285182	-1.20468	-0.626923	0.550444	0.37186	-0.674554	-0.46136	-1.20468	-0.459182	-0.271324	-0.401024	-1.20468	-0.761544	-1.20468	-1.20468
HBA1--NM-000558--chr16--+	-0.372992	-0.372992	-0.372992	-0.372992	-0.372992	-0.372992	-0.372992	-0.372992	-0.372992	-0.372992	-0.372992	-0.372992	-0.372992	-0.372992	-0.372992	-0.372992	1.86416	-0.372992	-0.372992	-0.372992	-0.372992	-0.372992	-0.372992	-0.372992	0.100674	-0.372992	-0.372992	-0.372992	-0.372992	-0.372992	-0.372992	-0.372992	-0.372992	-0.372992	-0.372992	-0.372992	-0.372992	-0.372992	-0.372992	-0.372992	-0.372992	-0.372992	-0.372992	-0.372992	-0.372992	-0.372992	-0.372992	-0.372992	-0.372992
HBA2--NM-000517--chr16--+	-0.0945065	-0.452842	-0.452842	-0.452842	-0.452842	-0.452842	-0.452842	-0.452842	-0.452842	-0.452842	-0.452842	-0.452842	-0.452842	-0.452842	-0.452842	-0.452842	-0.452842	-0.452842	-0.452842	-0.452842	-0.452842	-0.452842	-0.452842	-0.452842	-0.452842	-0.452842	-0.452842	-0.452842	-0.452842	-0.452842	-0.452842	-0.452842	-0.452842	-0.452842	-0.452842	-0.452842	-0.452842	-0.334489	-0.452842	-0.452842	-0.452842	-0.452842	-0.452842	-0.452842	-0.452842	-0.452842	-0.452842	-0.452842	-0.452842
HBB--NM-000518--chr11---	-0.785999	-0.785999	-0.785999	-0.785999	-0.785999	-0.785999	-0.785999	-0.785999	-0.785999	-0.785999	-0.785999	0.394568	-0.785999	-0.322989	-0.785999	-0.785999	-0.785999	-0.785999	-0.785999	-0.606651	-0.785999	-0.785999	-0.785999	-0.785999	-0.785999	-0.785999	-0.785999	-0.785999	-0.785999	-0.785999	-0.785999	-0.490319	-0.785999	-0.785999	-0.785999	-0.785999	-0.785999	-0.684823	-0.785999	-0.785999	-0.495848	-0.785999	-0.785999	-0.785999	-0.384875	-0.785999	-0.483475	-0.785999	-0.785999
HINT1--NM-005340--chr5---	0.989242	-1.48917	2	0.987767	-0.128757	0.722256	1.33948	-0.0504912	1.22239	0.887744	1.04557	0.45293	-1.48917	-0.232705	-1.48917	-0.0262843	-1.48917	-1.48917	0.413581	1.03072	0.120704	1.00597	1.75159	0.485984	0.362358	1.36594	1.31395	0.696402	-0.825333	1.29954	0.469329	0.709744	1.74456	-0.578241	1.11804	-0.407871	-0.160476	1.64157	1.54749	0.113897	1.11177	0.076103	0.689134	0.904484	0.759544	1.10038	0.302822	-1.48917	1.9165
HIST2H2AA3--NM-003516--chr1---	-0.1384	-0.631281	1.73048	0.360385	-0.631281	-0.631281	-0.631281	0.241839	-0.631281	-0.631281	-0.631281	2	-0.631281	1.85954	-0.631281	-0.631281	-0.631281	-0.631281	-0.0130731	0.100775	-0.631281	0.179793	1.45735	-0.135972	0.378859	0.115148	-0.631281	-0.631281	0.0180039	0.908363	1.28428	-0.631281	2	-0.631281	-0.631281	-0.631281	0.308021	0.493972	-0.631281	-0.631281	-0.631281	-0.631281	-0.162895	-0.631281	-0.631281	-0.631281	0.216122	-0.631281	0.886196
HLA-A--NM-002116-3--chr6--+	-0.199861	-1.03127	-1.03127	-0.0690574	-1.03127	-1.03127	-0.423713	-0.54278	-0.228527	-1.03127	-1.03127	-1.03127	-1.03127	0.16115	-1.03127	-1.03127	-1.03127	-1.03127	-0.431423	-1.03127	-1.03127	-1.03127	-1.03127	-0.769862	-0.454793	-0.30701	-1.03127	-1.03127	-0.401269	-1.03127	-1.03127	-0.569653	-1.03127	-1.03127	-1.03127	-1.03127	-1.03127	-0.185659	-1.03127	-1.03127	-0.578285	-1.03127	-1.03127	-0.0364819	-1.03127	-1.03127	-1.03127	-1.03127	-1.03127
HLA-B--NM-005514-2--chr6---	-1.12119	-1.12119	-1.12119	-0.605097	-1.12119	-1.12119	-0.565677	-0.346573	0.0713231	-1.12119	0.221916	-1.12119	-1.12119	-0.460258	-1.12119	-1.12119	-1.12119	-1.12119	-1.12119	-0.173256	-0.369745	-0.832626	0.122442	-0.509196	-0.594095	0.289791	-1.12119	-1.12119	-1.12119	-1.12119	0.578262	-0.38453	-0.452567	-1.12119	-0.433913	-1.12119	-0.558156	-0.524483	-1.12119	-1.12119	-1.12119	-0.39562	-1.12119	-0.211617	-0.80224	-1.12119	-0.369389	-1.12119	-1.12119
HLA-C--NM-002117--chr6---	0.0438315	-0.666128	-1.26108	-0.712944	-0.49076	-0.703381	-1.26108	-0.786705	-1.26108	-1.26108	-1.26108	-1.26108	-1.26108	0.235257	-1.26108	-1.26108	-1.26108	-1.26108	-1.26108	-0.989173	-1.26108	-1.26108	1.13948	-0.306725	-0.70126	-0.557746	-0.338105	-1.26108	-1.26108	0.189673	0.543886	0.199156	-0.550944	-0.42156	-0.531132	-1.26108	-0.511768	-0.0624773	-1.26108	-1.26108	-0.491726	-0.490462	-0.819737	-1.26108	-1.26108	0.410554	-0.462602	-1.26108	0.839374
HLA-DPA1--NM-033554--chr6---	-0.342093	-0.792224	0.695007	-0.792224	-0.792224	-0.792224	-0.792224	-0.792224	-0.792224	-0.184837	-0.792224	-0.792224	-0.792224	-0.111861	1.15542	-0.792224	-0.792224	-0.792224	-0.227636	-0.792224	-0.792224	-0.495176	-0.792224	-0.546181	-0.792224	-0.792224	-0.792224	-0.792224	-0.792224	-0.792224	-0.792224	-0.792224	-0.792224	-0.792224	-0.792224	-0.22032	-0.792224	-0.389722	0.789314	-0.792224	-0.792224	-0.36508	-0.792224	-0.792224	-0.792224	-0.792224	-0.792224	-0.792224	-0.792224
HLA-DPB1--NM-002121--chr6--+	-0.761605	-0.761605	-0.761605	-0.761605	-0.761605	-0.761605	0.167008	-0.761605	-0.761605	-0.761605	-0.761605	-0.761605	-0.761605	0.317538	-0.761605	-0.761605	-0.761605	-0.761605	-0.761605	-0.761605	-0.334398	-0.244303	-0.761605	-0.761605	-0.761605	-0.106148	-0.761605	-0.761605	-0.761605	-0.761605	-0.761605	-0.761605	-0.761605	-0.761605	-0.761605	-0.761605	-0.20432	-0.618655	-0.761605	-0.250263	-0.761605	-0.761605	-0.761605	-0.761605	-0.19486	-0.761605	-0.761605	-0.761605	-0.761605
HLA-DRA--NM-019111-5--chr6--+	-0.937908	-0.937908	-0.937908	-0.937908	-0.937908	-0.937908	-0.454616	-0.54933	-0.937908	-0.937908	-0.937908	-0.937908	-0.937908	-0.937908	-0.937908	-0.937908	-0.937908	-0.937908	-0.460749	-0.937908	-0.937908	-0.937908	0.144043	-0.937908	-0.937908	0.0122104	-0.937908	-0.489581	-0.937908	-0.937908	-0.937908	-0.937908	0.0200899	-0.937908	-0.339981	-0.454565	-0.748921	-0.699691	-0.937908	-0.488454	-0.577573	-0.576909	-0.937908	-0.937908	-0.660424	-0.937908	-0.937908	-0.937908	-0.937908
HLA-DRB1--NM-002124--chr6---	-0.679206	-0.101787	-0.679206	-0.679206	-0.679206	-0.679206	0.287871	-0.679206	-0.679206	-0.679206	-0.679206	-0.679206	-0.679206	-0.679206	-0.679206	-0.679206	-0.679206	-0.679206	-0.679206	-0.679206	-0.679206	-0.679206	-0.679206	-0.226248	-0.679206	-0.679206	-0.679206	-0.679206	-0.679206	-0.679206	-0.679206	-0.679206	0.010002	-0.679206	-0.679206	-0.679206	-0.455289	-0.530335	-0.679206	-0.679206	-0.679206	-0.679206	-0.679206	0.25837	-0.0889859	-0.679206	-0.679206	-0.679206	-0.679206
HP--NM-001126102--chr16--+	2	1.6354	2	1.08897	1.21885	1.38299	0.528352	1.07633	1.49484	1.29298	0.820075	2	1.38814	0.227947	-0.817411	1.70025	-0.202367	2	1.86458	1.52913	1.22174	0.968684	2	1.81558	0.786349	0.613299	1.56117	0.654941	0.151381	1.71249	1.44598	1.13836	1.91388	-0.313756	0.780775	1.03806	1.25886	0.498974	1.50731	1.03112	1.36621	1.63396	2	0.52898	0.770146	1.85098	1.48255	-1.39447	1.29831
HP--NM-005143--chr16--+	2	0.569038	2	1.10073	0.337709	0.605902	0.874595	0.920773	-0.321494	0.000721417	1.10908	2	0.87691	0.642674	0.341484	1.01435	0.907756	2	1.43087	1.45239	0.945235	0.65312	2	1.57937	1.32045	0.125919	0.60401	0.345717	0.330434	2	1.98988	0.7093	2	-0.248085	1.0542	0.126963	1.42742	1.20207	0.636417	0.208717	0.524777	0.338179	0.33974	0.734692	0.244512	1.39421	1.06749	-0.160931	2
HPX--NM-000613--chr11---	2	1.54264	1.71337	0.689527	1.13553	0.245288	0.966436	1.91195	0.627673	0.633866	-0.117834	2	1.64414	0.498774	-1.04085	1.46633	-1.04085	1.82441	1.72521	1.76138	0.810555	0.37222	1.76387	2	0.899015	0.501087	1.06495	0.476482	0.82485	1.1462	2	0.92035	2	-1.04085	-0.289784	0.779427	1.47052	0.695002	1.83871	-0.0785513	1.23812	0.899571	1.59472	0.521184	0.336174	2	1.07322	0.447477	2
HSP90AA1--NM-005348--chr14---	-0.914292	-0.825625	-1.22977	-0.857427	-0.706499	-0.85093	-0.552895	-0.907532	-0.128221	-0.516501	-0.260763	-1.22977	-1.22977	1.517	-1.22977	-1.22977	-1.22977	0.142657	-0.350937	-0.372326	-0.918376	-1.22977	-0.33253	-1.22977	-0.583207	0.252965	-0.969145	-1.22977	-1.22977	-1.22977	-1.22977	-0.698295	-0.435322	-1.22977	-1.22977	-1.22977	-0.720769	0.596226	-1.22977	-1.22977	-0.930953	-0.930402	-0.92997	1.06217	-0.664733	-0.0942418	-1.22977	-1.22977	-1.22977
HSPA1A--NM-005345-3--chr6--+	-1.04639	-1.34591	-0.356291	-0.74328	-0.849108	-0.986234	-0.9654	-0.81532	-0.300082	-1.34591	-0.425919	-1.34591	-1.34591	0.625969	-1.34591	-1.34591	-1.34591	-1.34591	-0.970229	-1.34591	-0.657073	-1.34591	-1.34591	-0.822926	-1.34591	0.265135	-1.09847	-1.34591	-0.951344	-1.34591	-1.34591	-0.84132	-1.34591	-1.34591	-1.34591	-1.34591	-0.494128	-0.492149	-1.34591	-0.742744	-1.06221	-1.06169	-1.06128	0.0768135	-1.34591	-1.34591	-0.830948	-0.413029	-1.34591
HSPA1B--NM-005346--chr6--+	-0.90983	-0.90983	-0.90983	-0.90983	-0.90983	-0.90983	-0.90983	-0.90983	-0.90983	-0.90983	-0.90983	-0.90983	-0.90983	0.833282	-0.90983	-0.90983	1.40739	-0.90983	-0.90983	-0.90983	-0.90983	-0.90983	-0.90983	-0.90983	-0.90983	1.39619	-0.90983	-0.90983	-0.90983	-0.90983	0.672016	-0.90983	-0.90983	-0.90983	-0.90983	-0.90983	-0.385759	0.0815843	-0.90983	-0.90983	-0.90983	-0.90983	-0.90983	0.420626	-0.90983	-0.90983	-0.90983	-0.90983	-0.90983
HSPE1--NM-002157--chr2--+	0.0739282	-0.452557	-1.0991	0.921615	0.263383	-0.49304	0.823265	-0.583589	-1.0991	-0.418086	0.451089	-1.0991	-1.0991	-0.336263	1.08464	-1.0991	-1.0991	1.92707	0.306833	0.705245	-0.231795	0.393326	0.336278	-0.0619907	0.263358	0.52943	-0.0960909	-0.504323	-0.434251	1.69385	1.66174	-1.0991	1.28737	-1.0991	0.202157	-0.0161551	-0.284813	1.00322	0.674151	-1.0991	-1.0991	-0.26166	0.470171	-1.0991	0.194142	0.717484	-0.231384	-1.0991	-1.0991
IFITM1--NM-003641--chr11--+	-0.718771	-0.718771	-0.718771	-0.216452	-0.718771	-0.718771	-0.178085	-0.718771	0.441914	-0.718771	-0.718771	-0.718771	-0.718771	-0.0754794	-0.718771	-0.718771	-0.718771	-0.718771	-0.718771	-0.263039	-0.718771	-0.718771	-0.718771	-0.29107	-0.205744	-0.718771	-0.718771	-0.718771	-0.718771	-0.718771	-0.718771	-0.307962	-0.718771	-0.718771	-0.718771	-0.718771	-0.170764	-0.578201	0.776593	-0.718771	-0.718771	-0.314901	-0.718771	-0.718771	-0.718771	-0.718771	-0.718771	-0.718771	-0.718771
IFITM3--NM-021034--chr11---	0.958386	-0.215518	1.87158	-0.279056	0.186421	0.235068	1.15559	0.550739	-1.13574	-0.173065	0.172097	-1.13574	-1.13574	-0.492166	-1.13574	0.69927	-1.13574	-1.13574	0.638083	0.462849	0.377851	-0.435067	1.06514	1.24607	0.238891	0.690159	0.33189	-0.280177	-0.192914	-1.13574	2	0.823442	1.76506	-1.13574	0.278034	-1.13574	0.668474	0.36865	-1.13574	-0.278294	-1.13574	0.703207	0.188196	0.256098	-0.197808	1.05229	0.225033	-1.13574	-1.13574
ITIH4--NM-001166449--chr3---	1.89067	2	-1.24542	0.713277	1.43259	0.849218	0.918397	1.16975	-0.0948584	0.875895	1.06089	1.04672	0.834061	0.113882	-1.24542	0.572779	1.1565	1.72132	1.28063	1.03995	0.389148	1.25788	1.23081	1.50598	0.738273	0.889154	1.04271	0.826483	-0.023947	1.39093	2	0.954476	0.901564	-0.482784	1.07304	1.29745	1.55958	0.404813	1.29689	0.829509	1.14409	1.00921	1.53291	0.980325	0.481329	2	0.981793	0.680824	0.0534987
LGALS1--NM-002305--chr22--+	-0.142873	-0.617351	-0.617351	-0.617351	-0.167298	-0.617351	0.400664	0.22317	-0.617351	-0.617351	-0.617351	-0.617351	-0.617351	0.0998131	-0.617351	-0.617351	-0.617351	1.44676	-0.617351	-0.617351	-0.617351	-0.617351	-0.617351	-0.617351	-0.617351	-0.617351	-0.617351	-0.617351	-0.617351	0.86481	-0.617351	-0.617351	0.577491	0.240344	-0.617351	-0.0145121	-0.617351	-0.193078	-0.617351	-0.617351	-0.167931	-0.167102	-0.617351	-0.617351	-0.617351	-0.617351	-0.617351	-0.617351	-0.617351
MALAT1--NR-002819--chr11--+	-1.37463	-0.444709	0.190266	-0.51358	-1.39154	-0.261528	-0.451867	-0.141045	-0.556102	-0.399479	-0.427481	-1.70314	-1.70314	1.18728	-0.281737	-1.70314	0.167121	-1.70314	-1.2911	-0.591537	-0.0321182	-1.16255	-1.70314	-0.320682	-0.642584	1.5937	-0.780145	-0.278382	-1.27039	-0.676958	-1.70314	-0.3549	-1.20083	-0.749062	-0.419224	-0.998246	-0.836972	1.60596	-1.70314	0.321111	-1.15894	-0.369184	-1.15735	-1.01981	-0.576578	-1.70314	0.696674	-0.679979	-1.70314
MT1G--NM-001301267--chr16---	1.71226	0.26661	2	1.71526	2	0.630193	1.81601	0.995353	0.921605	-0.105475	1.69977	0.276399	0.34506	0.918151	-1.35209	-1.35209	-1.35209	1.18156	1.39975	0.554668	0.877976	1.1155	0.832043	0.938094	1.27788	1.43248	-0.0227183	0.828141	0.464972	-1.35209	2	0.997376	1.80416	-1.35209	1.20291	-0.815221	0.79403	0.992771	0.776947	-0.501163	0.241832	0.75099	1.33249	1.22665	1.78282	1.54958	0.61831	-0.0360146	0.961798
MT2A--NM-005953--chr16--+	1.46709	-0.855955	2	1.77045	0.691436	0.401298	1.35483	-0.0943216	0.336275	0.297343	0.522451	0.312004	0.209598	0.438261	-2	1.03388	0.0266888	1.5403	0.453942	0.608301	0.061123	0.939999	1.41972	0.452243	0.509632	0.440727	1.02102	0.264341	0.120583	-0.398419	2	1.18767	2	-0.734608	0.681478	-0.00365816	0.0397784	0.378255	1.71471	-0.615561	0.657937	0.59347	0.130188	0.712373	0.96935	1.2969	0.225268	-0.402623	0.612817
MYL6--NM-079423--chr12--+	0.0820292	-0.658335	-1.27877	-0.304338	-0.475457	-0.289474	0.345962	0.306463	-1.27877	-0.18378	-0.343285	0.587738	0.0118681	0.281653	-1.27877	-1.27877	-1.27877	1.6252	-0.671304	0.0375517	-0.446487	-0.699906	1.56384	-0.433121	-0.286184	0.997475	-0.568967	-1.27877	-1.27877	0.234117	0.603499	-0.184996	0.811431	-1.27877	0.329317	0.0841456	-0.655165	0.989077	-1.27877	-1.27877	-0.476464	-0.475146	-0.818522	-0.271348	-0.925506	-1.27877	-0.446093	-1.27877	-1.27877
NACA--NM-001113202--chr12---	-0.139548	-1.22356	0.884451	-0.331132	-0.778957	-0.560295	0.585915	-0.71407	-1.82599	0.227713	0.922712	0.728946	-0.572796	-0.653462	-1.82599	0.200671	-1.82599	0.219789	0.294396	-1.32244	-0.154315	0.964321	0.604748	-0.133953	-0.862202	1.07325	-0.0771642	-0.332777	-1.2065	-0.356995	1.57235	-1.03375	0.717556	-1.82599	1.01749	-0.816926	-0.929789	1.16781	-1.82599	-0.576542	-1.04696	-0.365285	-0.363778	-0.847796	0.351587	-0.133338	-0.744011	-1.82599	-0.378145
NNMT--NM-006169--chr11--+	1.50189	1.38025	2	0.532769	0.287856	0.896993	1.11697	0.831746	0.757091	0.69765	0.271887	1.39288	1.1536	0.343275	-1.18618	1.30444	-1.18618	0.878913	1.23068	0.596037	0.330329	1.10092	2	1.15498	0.557968	-0.000605136	0.905716	0.872639	0.44882	0.986427	0.658735	0.112428	2	-0.328081	0.0377472	0.149687	1.72489	0.491018	1.67437	-0.625346	0.604454	0.976378	0.865792	0.365537	0.659662	2	1.31983	-1.18618	-1.18618
ORM1--NM-000607--chr9--+	2	0.981639	1.15324	0.635565	0.658071	1.11298	0.46674	1.1386	0.556189	0.43098	0.586624	2	2	0.166387	0.182067	1.39401	-1.35379	2	1.88985	1.9418	1.41522	0.93195	2	1.77621	0.582618	0.834582	1.04661	1.1368	0.295944	1.50655	1.8707	0.497094	1.96035	-0.712143	0.877729	0.785654	1.6163	0.823048	1.69682	0.48027	0.478272	1.25755	1.25913	0.676269	0.346233	1.85118	1.61153	0.266858	1.59611
ORM2--NM-000608--chr9--+	2	0.906385	2	-0.0546283	0.979213	1.37647	0.672266	0.753174	1.33343	0.60395	0.858873	2	1.88491	0.990679	-1.07566	1.61056	-1.07566	2	1.95544	2	1.36388	-0.161751	2	1.85478	1.02246	0.731946	0.95401	0.592386	0.037852	1.32767	2	0.602568	2	-0.380429	0.20135	0.389381	1.68346	0.848015	0.862158	0.815873	0.758555	1.36615	1.4571	0.751195	-0.386819	1.78981	1.2622	0.122213	2
PPP1R15A--NM-014330--chr19--+	-0.663087	-0.663087	-0.663087	-0.663087	-0.663087	-0.663087	-0.663087	-0.663087	-0.663087	-0.0227966	-0.663087	-0.663087	-0.663087	2	-0.663087	-0.663087	-0.663087	-0.663087	-0.663087	-0.663087	-0.663087	-0.663087	-0.663087	-0.663087	-0.663087	2	-0.663087	-0.663087	-0.663087	-0.663087	-0.663087	-0.663087	-0.663087	-0.663087	-0.663087	-0.663087	-0.226734	0.262376	-0.663087	-0.663087	-0.663087	-0.663087	-0.663087	0.888018	-0.663087	-0.663087	-0.663087	-0.663087	-0.663087
PTMA--NM-002823--chr2--+	-1.05978	-0.962437	-1.40613	-0.151956	-1.07761	-0.990219	-0.0868905	-1.05236	-1.40613	-0.623064	-0.3423	-1.40613	-1.40613	-0.882629	-1.40613	-0.400686	-1.40613	0.100597	-0.671241	0.00775168	-0.442492	-0.294914	-0.42109	-0.510041	-0.471133	0.876278	-0.565151	-0.997962	-0.213206	0.179041	-1.40613	-1.07182	-0.533941	-1.40613	-0.256128	-0.966083	-0.654271	0.532967	-0.189221	-1.40613	-0.635872	-0.831432	-1.07699	0.239035	-0.952601	-1.40613	-0.442104	-1.40613	-1.40613
RARRES2--NM-002889--chr7---	1.5506	0.517355	2	1.16522	0.826278	0.924246	0.775329	0.409566	0.841487	0.71991	0.377708	2	1.09021	0.344149	-1.21644	1.22635	-1.21644	1.24509	0.634589	1.40742	0.492034	0.868534	1.19308	1.24146	0.291904	0.108224	0.748939	0.995604	0.386368	2	2	1.36004	2	-0.0241634	0.758637	0.775452	0.708561	1.06167	1.25737	-0.125714	0.651728	0.333964	0.655327	0.468648	0.684515	1.84217	0.950764	-1.21644	1.7527
RBP4--NM-006744--chr10---	1.64254	0.112916	2	0.950915	0.86136	0.204964	0.646766	1.71305	0.60016	1.28235	0.697948	0.985133	0.566287	0.858069	-1.87779	2	-1.87779	2	0.779462	1.19703	0.966232	0.890898	2	1.3691	1.01181	0.392302	1.23575	0.912301	0.229916	1.40603	2	0.911304	2	-0.808391	0.348644	0.964356	1.24461	1.45782	2	0.186971	1.39453	1.35963	0.368465	0.705536	0.853974	1.55285	1.10166	0.155525	1.76005
RPL10--NM-001256577--chrX--+	-0.119891	-0.995275	-0.995275	0.341499	-0.517659	-0.995275	0.085086	-0.480948	-0.995275	-0.995275	-0.995275	-0.995275	-0.995275	-0.995275	-0.995275	0.466474	-0.995275	1.19525	-0.995275	-0.247392	-0.498257	-0.166665	-0.995275	-0.720041	-0.995275	0.629517	-0.257303	-0.995275	0.1197	-0.995275	-0.995275	-0.509243	0.641617	-0.995275	-0.203852	0.0851839	-0.745129	0.23125	-0.995275	0.0187314	-0.995275	-0.995275	-0.158684	0.0521293	-0.627993	-0.995275	-0.995275	-0.995275	-0.995275
RPL10--NM-001303624--chrX--+	0.0889579	-0.904607	-1.45678	0.544332	-1.04794	-0.296685	-0.0108074	-0.0459609	-0.281302	-0.482265	0.216987	-1.45678	-1.45678	-0.382078	-1.45678	0.400792	-1.45678	1.12768	-0.256061	0.161465	-0.257548	0.283289	-0.230913	-0.450972	-0.573402	0.861601	0.817893	-0.590694	-0.502358	-1.45678	-1.45678	0.0524138	0.874551	-0.677627	0.22782	-0.243818	-0.231017	0.618435	0.714954	-0.947541	-0.119709	-0.741574	0.172586	-0.047827	0.0213589	0.75815	-1.0311	-1.45678	0.492633
RPL10--NM-006013--chrX--+	-0.0260129	-1.44309	-0.0324909	0.100473	-0.824028	-0.528799	0.219025	-0.761621	-1.00922	-1.41058	0.133312	-0.0469233	-1.27884	-0.067629	-2	-0.436893	-0.29128	0.39243	-0.789338	-0.0197745	0.0371876	0.174945	0.348378	-0.323692	0.0334581	0.410546	-0.426905	-0.63524	-1.71829	-0.65536	0.401011	-0.283041	0.238881	-2	0.365466	-0.247351	-0.806868	0.820373	0.537322	-1.7626	-0.663868	-0.590999	-0.24899	-0.8093	0.20951	-0.148156	-0.883981	-2	0.210706
RPL10A--NM-007104--chr6--+	-0.103712	-1.03279	0.382201	0.0646312	-0.461039	-1.06512	0.143931	-0.835133	-0.449942	-1.00527	0.0160078	-1.54913	-1.54913	0.17702	-1.54913	-0.379079	-1.54913	0.867599	-1.04359	-0.559174	-0.622188	0.0780068	-1.54913	-0.0989164	-1.54913	0.734452	-0.159876	-0.480385	-0.160907	0.295555	1.06338	0.209612	0.35673	-1.54913	0.222442	-0.68428	-0.325101	0.855301	0.481656	-1.07294	-0.652768	-0.65142	0.0890109	-0.23162	0.750571	-0.0983896	-0.427278	-1.54913	0.273764
RPL11--NM-000975--chr1--+	-0.0677519	-0.484726	-1.95363	0.529702	-0.918462	-0.270907	0.675389	-0.558753	-0.907905	-0.82238	0.896489	-1.95363	-0.931783	-0.495962	-1.95363	0.72455	-1.95363	0.742794	-1.14002	-0.449346	-0.35783	0.823269	0.512338	-0.288535	0.138207	0.897974	-0.432453	-0.419863	-0.456528	-0.198665	1.04346	0.178416	0.72732	-1.95363	1.05399	-0.874558	-0.534887	0.91967	-0.606373	-1.18145	-0.398365	-1.31737	0.0290116	-0.379675	0.465396	-0.57345	-0.886343	-1.95363	0.419444
RPL11--NM-001199802--chr1--+	-0.206327	-1.28374	0.247851	0.394846	-0.844046	-0.727082	0.271355	-0.81025	-1.28374	-0.235683	1.04793	-1.28374	-1.28374	-0.583084	-1.28374	0.714017	-1.28374	-1.28374	-0.300162	-0.145182	-0.826185	0.88477	-1.28374	-0.0844132	-0.0323383	0.704099	-0.900782	-0.737445	-1.28374	0.164304	-1.28374	-0.0156235	0.492996	-1.28374	0.527992	-0.289068	-0.686865	0.789464	-1.28374	-0.736072	-0.844665	-1.28374	-0.0305324	-1.28374	0.51876	-1.28374	-0.486753	-1.28374	-1.28374
RPL12--NM-000976--chr9---	0.108361	-1.2168	0.52212	0.460359	-0.666501	-0.921346	0.624261	-0.796516	-1.71375	-1.1903	0.406872	-0.218719	-0.155685	-0.239072	-1.71375	-0.587617	-1.71375	0.612265	-0.424432	-0.130156	-0.634442	0.924772	0.563119	0.113565	-0.00735111	0.76331	-0.271126	-0.481983	-0.199178	-0.501962	0.408324	0.071192	0.854988	-1.71375	0.418042	0.0493895	-0.465528	1.01334	0.907695	-0.0286457	-0.140336	-0.666156	-0.507557	0.653654	0.310677	-1.71375	-1.71375	-0.505529	1.24959
RPL13--NM-000977--chr16--+	-0.295592	-0.622026	-0.200487	0.510164	-0.710387	-0.805005	0.860366	-0.641114	-0.614288	-0.99713	0.146731	-2	-0.816651	-0.338372	-2	0.0641618	-2	0.514019	-0.43759	-0.28917	-0.866739	0.300034	-0.163216	-0.387071	-0.0993754	1.04753	0.119845	-0.597285	-0.856189	-0.619042	1.27868	-0.113297	1.13693	-1.59556	0.381095	-1.24064	-0.696486	0.887249	0.670702	-0.820146	-0.291364	-0.549443	-0.54806	-0.557958	0.404627	-0.0705604	-0.764934	-1.13468	-0.0505891
RPL13A--NM-012423--chr19--+	-0.062886	-0.789415	-1.89304	-0.201573	-0.311286	-0.0651755	0.105347	-0.617699	-1.89304	-0.191441	0.384401	-0.391409	-1.89304	-0.92154	-0.207137	-0.213847	-1.89304	-0.198007	-0.016937	-0.243714	-0.0766963	-0.469792	-0.241913	0.0285862	-0.0610055	0.945972	0.0396784	-0.48358	-0.551027	-0.675902	-1.89304	0.138667	0.214419	-1.18871	-0.0184546	-1.39799	-0.709755	0.542906	0.454901	-0.857808	-0.312681	-0.0328603	-0.420139	-1.89304	0.758741	-1.89304	-0.808531	-0.679486	0.240598
RPL14--NM-003973--chr3--+	-0.327895	-0.946399	-0.450368	0.548146	0.0923857	-1.36324	0.45129	-0.165284	-1.88447	-1.29878	0.797525	0.47372	-1.88447	-0.802234	-1.88447	-0.624438	-1.88447	0.00377122	-0.675333	-0.60072	-0.67683	0.690971	0.663125	-0.0578566	0.275278	1.05864	-0.270315	-0.506243	-0.189812	-1.88447	0.489925	0.112706	0.167957	-1.09985	0.20379	-1.333	-0.414045	1.0735	-1.88447	-1.01039	-0.123974	-0.245218	0.09456	-0.981604	0.125421	-1.88447	-1.13821	-1.88447	0.0786113
RPL15--NM-002948--chr3--+	-0.800154	-0.866799	0.605878	0.259048	-0.840114	0.0436605	0.713516	-1.33274	-1.75029	-0.826041	0.775664	-1.75029	-0.660899	0.16867	-1.75029	-0.563569	-1.75029	-1.75029	-0.391604	-0.215511	-0.810143	-0.0999702	0.649083	0.0248674	-0.430529	0.318027	0.131595	-0.666319	-0.845098	0.804229	-0.161518	-1.06161	1.03472	-1.01133	0.364726	-0.87312	-0.763758	1.14748	0.713105	-1.26732	-0.0922218	-0.839792	-0.0888094	-0.0722963	0.26906	0.3504	-0.809736	-1.75029	-1.75029
RPL17--NM-001035006--chr18---	-0.503595	-0.885861	-0.474959	0.104381	-0.546447	-0.695204	-0.028832	-0.354975	-1.66294	-1.66294	0.763461	-1.66294	-1.66294	0.0248884	-1.66294	-0.619155	-1.66294	-0.0987581	-1.21196	-0.446267	-0.166571	0.436773	-0.640337	-0.309804	-0.692288	0.7065	-0.0077206	-0.362286	-0.424527	-1.66294	0.303962	-0.403989	0.0372506	-1.66294	0.31297	-0.891421	-0.714902	1.04926	-0.399627	-1.66294	-0.863309	-1.32174	-0.108696	-0.487609	0.538083	-0.368756	-0.662153	-1.66294	-1.66294
RPL18--NM-000979--chr19---	-0.707325	-0.180959	0.661832	0.475283	-0.465172	-0.992946	-0.335262	-0.873127	-1.75354	-1.75354	0.281957	-1.75354	-1.75354	0.246988	-1.75354	-1.75354	-1.75354	-0.1337	-0.515979	-0.292793	-0.429914	0.489636	0.641058	-0.479122	-0.241977	0.837787	0.0934423	-0.406605	-0.929044	-1.75354	-0.306405	0.0414366	0.553731	-1.75354	0.587327	-1.75354	-0.375857	1.10899	0.979187	-1.75354	-0.598483	-0.747999	-0.240178	-0.225137	-0.158526	-0.413304	-1.11336	-1.75354	0.550852
RPL18A--NM-000980--chr19--+	-0.189393	-1.76248	0.558096	0.316659	-0.86605	-0.67884	0.190944	-0.810496	-1.76248	-1.2192	0.725317	0.424959	-1.76248	-0.231934	-1.76248	-0.593683	-1.76248	0.651657	-0.0851866	-0.32306	-0.202573	-0.137088	0.600648	-0.45975	-1.27715	0.129815	-0.63125	-0.484047	-0.375746	-1.76248	-0.197707	-0.496562	1.0525	-1.03468	0.671998	-0.411701	-0.466969	0.621915	1.19239	-1.76248	-0.676717	-1.09441	-0.367601	-0.446383	0.44089	-0.313296	-0.641831	-1.76248	-0.52289
RPL19--NM-000981--chr17--+	-0.497246	-1.25938	-0.83124	0.513926	-0.905728	-0.424987	0.114212	-0.706222	-1.44021	-1.56354	-0.0210415	-0.625216	-1.07068	-0.310422	-2	-0.981486	-2	-0.439256	-1.02542	0.0640122	-1.02671	0.622004	0.34027	-0.659157	-1.30125	0.821519	-0.418103	-1.07565	-0.327842	0.00418999	-0.0196393	-0.18674	0.672934	-1.39184	0.286208	-1.26518	-0.682903	0.911777	0.861268	-2	-0.549517	-0.772385	-0.54639	-0.28951	0.259931	-0.720581	-0.871754	-0.902208	-0.374659
RPL21--NM-000982--chr10---	-0.075168	-0.291383	-0.320306	-0.035854	-0.989066	-1.17515	0.524031	-0.332846	-0.554772	-0.464115	-0.0848879	-1.66324	-0.580083	-0.649803	-1.66324	-0.48331	-1.66324	-1.66324	-0.53097	-0.4611	-0.728471	-0.265346	-1.66324	-0.516963	-0.565982	0.393238	-0.521234	-0.192938	-1.1278	-0.393562	0.56021	-0.24008	-0.341934	-0.928504	0.292266	-0.791088	-0.355388	0.845788	-1.66324	-1.66324	-0.567135	-0.988805	-0.0112684	-0.81777	0.457898	0.829193	-0.964423	-1.66324	-0.411842
RPL22--NM-000983--chr1---	-0.408559	-0.911288	-1.52866	1.07022	-0.0322048	-0.231585	0.661562	-1.52866	-0.719736	-0.439077	0.646721	1.08962	-1.52866	-0.327061	-1.52866	-0.129655	-1.52866	-1.52866	-0.186164	-0.103321	-1.05297	0.857514	0.513534	0.120772	-0.540976	1.06347	0.383162	-0.560309	0.131207	-1.52866	0.344313	0.158734	1.45755	-1.52866	0.789918	-0.172475	-0.751113	0.910575	0.899505	-1.52866	-0.456899	-0.0317398	0.140956	-0.526213	0.239091	-1.52866	0.0114971	-1.52866	0.650933
RPL23--NM-000978--chr17---	-0.310673	-1.16405	-1.16405	0.396334	-0.349852	0.157126	0.482698	0.237369	-1.16405	-0.0542222	1.05175	-1.16405	-1.16405	-1.16405	0.959902	0.260949	-1.16405	-1.16405	-0.122502	-0.257418	0.201698	0.524184	-1.16405	-0.477035	-0.158014	1.14304	0.0278558	0.394618	0.257151	-1.16405	-1.16405	0.178806	0.431689	-1.16405	0.465828	0.217334	0.0205663	1.9972	-1.16405	-0.584102	-0.0723754	0.161567	-0.697566	1.16761	0.519331	-1.16405	-0.32009	-1.16405	-1.16405
RPL23A--NM-000984--chr17--+	-0.170506	-1.33156	-0.0482612	-0.00311461	-0.985967	-0.623005	0.471367	-1.15229	-0.802953	-0.973383	0.336756	-1.79983	-1.79983	-0.234345	-1.79983	-0.224493	-1.79983	-0.209633	-0.584917	-0.15035	-0.383596	-0.143659	-0.76022	-0.424189	-1.05067	0.534288	-0.0498206	-1.06534	-0.227944	-0.657972	0.199786	-0.650508	0.46522	-1.79983	0.410427	-0.407408	-1.32916	0.618766	0.402896	-1.06372	-0.136379	-0.812691	-0.984721	-0.299397	0.32595	-0.484121	-0.958803	-0.661334	-0.674412
RPL24--NM-000986--chr3---	-0.278512	-0.3674	1.18608	0.873978	-0.651979	-0.433004	0.477712	-0.793166	-1.08212	-0.83679	0.112333	-1.78922	-0.0972676	-0.187821	-1.78922	0.0262547	0.609102	0.0433802	0.355546	-0.0060361	-0.443442	0.986838	-0.00408932	-0.203882	0.412132	0.597512	-0.337212	-0.104218	-1.78922	-0.4733	0.515208	-0.63681	0.028852	-1.78922	-0.142797	-0.0195637	-0.509901	1.15968	0.333297	-0.669969	0.0281236	-0.480726	-0.329768	-0.412197	0.789503	-1.78922	-1.37319	-1.78922	-0.492246
RPL26--NM-000987--chr17---	0.115697	-0.853516	-0.324936	0.82454	-1.10559	-0.260338	0.684686	-0.178836	-1.48659	-0.805208	1.09027	0.29103	-1.11855	-0.514887	-0.498405	0.317749	-2	0.124433	-1.32119	-0.0916505	-0.373488	1.20038	0.286727	-0.233659	0.328255	1.1384	-0.468594	-0.102329	-0.827732	-0.405151	-0.071734	-0.10077	0.495926	-1.43841	0.653097	-1.31226	-0.531818	1.08463	-0.232864	-1.12152	0.000458096	-0.953896	-0.411614	-0.581292	0.306557	0.175199	-0.666742	-2	-0.425324
RPL27--NM-000988--chr17--+	-0.998489	-1.45928	0.0631836	0.209304	-0.694983	-1.45928	0.776386	-0.643002	-0.202627	-0.099851	-1.45928	-1.45928	-1.45928	0.0253619	-1.45928	1.28264	-1.45928	0.545307	-0.88132	0.421783	-0.66742	-0.364324	0.493382	-0.384016	0.233764	0.516715	-0.54352	-0.237431	-0.852266	-0.0198658	1.06142	-0.0104574	0.306869	-0.626324	-0.735039	-0.162554	-0.458989	0.38331	-1.45928	-0.914879	-0.695941	-0.694687	-0.0265121	0.729487	-0.131433	-1.45928	-0.399091	-1.45928	-0.0405899
RPL27A--NM-000990--chr11--+	-0.417988	-0.491684	0.0249099	0.865713	-0.248298	-0.0133206	0.849818	-0.667863	-0.235852	-0.858674	0.571867	0.273497	-1.46864	-0.0121935	0.487284	1.47603	-1.46864	0.497876	-0.209381	-0.797239	-0.691817	0.356267	0.867921	-0.193804	-0.00926172	0.655934	0.0894708	-0.935915	-0.873152	-1.46864	-1.46864	-0.0473324	0.000856892	-0.651501	0.518258	-0.498674	-0.739304	0.485584	-1.46864	-1.46864	-0.463331	-0.718566	-0.246559	-0.528348	0.890396	-1.46864	-0.691449	-0.0607196	-0.0768926
RPL28--NM-000991--chr19--+	-0.768126	-0.571698	0.258075	0.55648	-0.806384	-0.6258	0.280285	-0.752428	-1.16111	-0.719335	0.60013	-1.74424	-0.348927	0.312425	-1.74424	-0.247061	-1.74424	0.338804	-1.00712	-0.381371	-0.298458	0.0625228	0.294791	-0.38259	-0.622681	0.673452	-0.144979	-0.823059	-0.738428	0.426637	0.156167	-0.417614	0.79838	-1.74424	0.516698	-0.578716	-0.75629	0.505611	0.00614947	-1.04465	-0.163319	-0.665156	-1.16705	0.375869	-0.0281582	0.0409654	-0.944937	-1.74424	-0.674656
RPL29--NM-000992--chr3---	-0.570153	-1.88855	0.0707302	-0.251435	-0.473771	-0.0942039	0.311797	-0.721207	-0.773454	-0.455555	1.23073	-0.312733	-0.798916	-0.334187	-1.88855	-0.126399	-1.88855	1.29659	-0.344661	-0.0992008	-0.435054	-0.679436	0.932696	-0.647386	-0.0899447	0.63229	-0.47919	-0.590223	-1.88855	-0.0171701	0.761764	-0.456881	0.323023	-1.88855	0.681992	-1.01118	-0.375693	0.973731	0.874545	-0.802173	-0.124585	-0.473353	0.0651319	0.0536553	0.245268	-1.88855	-0.947785	-1.88855	-0.0392758
RPL3--NM-000967--chr22---	-0.344731	-0.661412	0.315524	0.515255	0.0130825	-0.0882073	0.239473	-0.081945	-1.2192	-1.10647	1.25816	0.148392	-0.567578	-0.432999	-0.410673	-2	-2	0.956563	-0.163954	-0.534317	-0.362269	0.0901343	0.36894	-0.338091	-0.374316	1.75834	-0.177863	-0.769264	-1.13425	0.199408	0.167261	-0.523237	0.136151	-1.12967	1.22534	-0.145221	-0.727527	1.52796	0.448095	-1.57975	-0.54758	-1.02765	-0.543361	-0.196813	0.395124	-0.000340085	-0.800256	-2	0.53036
RPL30--NM-000989--chr8---	-0.357764	-1.79271	0.545405	0.798049	-0.658621	-0.416946	0.611389	-0.412318	-1.64427	-0.96229	0.710655	0.134904	-2	-0.851437	-2	0.161646	-2	0.861322	-0.587219	-0.323032	-0.170502	0.718063	0.130596	-0.429282	-0.515155	0.872695	-0.300255	-0.258798	0.0220251	-1.10453	0.149565	-0.194627	0.27315	-2	-0.218821	-0.261302	-0.600948	0.625919	1.26265	-1.27888	0.00351173	-0.658198	-0.211355	-1.05035	0.544382	0.293419	-0.823704	-2	-0.582076
RPL32--NM-000994--chr3---	-0.679437	-1.65012	0.274102	0.679004	-0.728058	-0.111347	0.604379	-0.455043	-0.426924	-0.161361	0.370759	-0.115418	-0.639037	0.0646407	-2	0.284211	-2	0.755741	-1.09395	-0.455678	-0.243414	0.63601	0.253479	-0.38248	-0.623112	0.56963	-0.29014	-0.409102	-1.05347	-0.0781073	-0.101618	-0.196233	0.581696	-1.45547	0.281987	-1.3305	-0.756015	0.809416	0.103768	-0.947782	-0.0884431	-0.358955	-0.28247	0.257074	0.473112	-0.224192	-1.27319	-2	-0.0995344
RPL34--NM-000995--chr4--+	-0.0340759	-0.620386	0.461968	0.615137	-1.11935	-0.184972	0.360345	-0.162869	-1.50963	-0.579363	0.559982	0.0760935	-0.413147	-1.50963	-1.50963	-1.50963	-1.50963	-1.50963	0.585228	0.290969	-1.1035	1.07456	0.617146	-0.549491	0.160678	1.02706	-0.510564	-0.203141	-0.598544	-1.50963	0.0894835	0.0615991	0.435966	-1.50963	0.469934	-1.50963	-0.725498	0.548366	0.563497	-1.02351	-0.828018	-0.398486	-0.592126	-0.653758	0.395643	-1.50963	-1.10328	-1.50963	-0.242837
RPL35--NM-007209--chr9---	-0.335769	-0.786378	1.66777	-0.00539302	-0.758711	-0.561634	0.471432	-0.492348	-0.990954	-0.216979	0.774983	-0.0689336	-1.70239	0.439539	-1.70239	-0.471988	-1.70239	1.27807	-0.521687	0.15241	-0.0602632	0.599102	0.488406	0.0812682	-0.334052	0.577344	0.0757981	-0.00705644	-0.242564	0.237441	-0.0551405	-0.0838643	1.26097	-0.936225	0.626785	-1.70239	-0.894654	0.539163	-1.70239	-1.20164	-0.387608	-0.235428	0.2301	0.310857	-0.248891	1.20813	-1.28381	-1.70239	-1.70239
RPL35A--NM-000996--chr3--+	-0.584186	-1.19329	0.592803	0.44501	-0.628066	-1.22525	1.02813	-0.254288	-1.70373	-0.122505	0.758291	-1.70373	-1.70373	-0.419954	-1.70373	-1.70373	-1.70373	-1.70373	-0.37943	-0.620778	-0.430821	0.830859	0.355813	-0.580033	-0.41737	0.439423	-0.450189	-0.903103	-1.17884	-1.70373	-0.155168	-0.450927	-1.70373	-0.983466	0.0476071	-0.848757	-1.06086	0.817901	-0.303771	-0.645082	-0.629216	-1.70373	0.0186278	0.398343	0.476812	0.343792	-1.31023	-1.70373	-0.476983
RPL36--NM-033643--chr19--+	0.195829	-0.687581	1.19084	0.715746	-0.905816	-0.457313	0.0279734	-0.599315	-1.6261	-0.104189	1.3044	0.0474958	-1.6261	0.233689	-1.6261	0.957917	-1.6261	-1.6261	-0.416385	0.212105	-0.417883	0.405354	-0.391049	-0.502576	-0.0305545	0.571041	-0.259908	-0.0552311	-0.664529	0.777055	1.76811	0.268804	0.583815	-1.6261	0.463162	0.028091	-1.41037	0.182815	0.56191	-1.11305	-0.455024	-0.658892	-1.21343	-0.722803	0.453713	-1.6261	-0.626964	-1.6261	-0.289109
RPL36AL--NM-001001--chr14---	-0.690093	-0.104106	-1.19473	0.825756	-0.35771	-0.163922	-0.112007	-0.67928	-0.347681	0.294046	-0.219991	-1.19473	0.150066	0.723625	-1.19473	-1.19473	-1.19473	1.00059	-0.123987	-0.100767	-0.696627	0.00440976	1.41369	-0.313598	-0.586436	1.17703	0.0305862	0.40763	-1.19473	1.5979	1.5658	0.391945	0.445741	-1.19473	1.02334	0.498309	-0.380537	0.779163	-1.19473	-1.19473	-1.19473	-0.0707675	-0.356311	0.454838	0.53584	-1.19473	-0.327114	-1.19473	-1.19473
RPL37--NM-000997--chr5---	-0.19064	-0.655964	0.495379	0.85109	-0.627394	-1.0763	0.521647	-0.826546	-0.40826	-0.310639	0.373799	-1.60189	-0.435516	-0.191706	-1.60189	-1.60189	1.66595	-1.60189	-0.673207	-0.0371174	-0.595305	0.0837915	0.252838	0.0452567	-0.188868	0.991981	-0.732054	-0.441318	-1.02531	-1.60189	0.0991519	0.0694901	-0.179071	-1.60189	0.321894	-0.370197	-0.767776	0.89067	-1.60189	-1.60189	-0.0889206	-0.627049	0.393707	-0.17118	0.351215	-0.0265031	-0.849383	-0.238691	-0.25435
RPL37A--NM-000998--chr2--+	-0.405998	-1.63055	-1.63055	0.392829	-0.90767	-1.1072	0.483966	-0.0451543	-0.899008	-0.103151	0.336745	-1.63055	-1.63055	-0.543893	-1.63055	-1.63055	-1.63055	0.265408	0.185063	0.148578	-0.628246	-0.232274	0.216298	-0.138896	-0.223534	0.574514	0.197904	0.112707	0.0710335	-0.269137	0.0632633	0.470399	0.430266	-0.0206816	0.28506	0.0296055	-0.578794	0.809472	0.995713	-0.752903	-0.661312	-1.21698	-0.906461	-0.205921	0.903972	-1.63055	-0.627812	-1.63055	-1.63055
RPL39--NM-001000--chrX---	-0.827892	-1.32098	0.308184	0.246433	-0.853275	-1.32098	1.55254	-1.32098	0.40072	-1.32098	0.904805	0.579343	-1.32098	-0.0915418	-1.32098	-1.32098	-1.32098	-1.32098	0.0526198	0.246388	-0.834276	0.480149	-1.32098	-0.307722	-1.32098	0.793499	-0.341038	0.244709	-0.22914	0.219315	-1.32098	0.0279246	-0.0792733	-1.32098	0.606173	-1.32098	-0.52542	0.563372	-1.32098	0.247603	-1.32098	-1.32098	-0.852398	0.290837	0.369984	1.21286	-0.47322	-1.32098	-1.32098
RPL5--NM-000969--chr1--+	0.0865631	-0.751872	0.511389	0.294993	-0.993208	-0.243682	-0.178718	-1.29922	-0.983664	-1.78974	0.625786	-1.78974	0.139051	0.035822	-1.78974	-0.395657	0.944301	-1.78974	-0.77079	-0.610236	-0.0826446	0.456759	-0.423949	0.092518	-0.0252936	0.639985	-1.08593	-0.516361	-0.726379	-1.78974	0.0766469	-1.32621	-0.228621	-1.78974	-0.551568	-0.759297	-0.424064	0.522352	0.629888	-0.822673	-0.994207	-0.9929	-0.125996	0.181459	-0.268067	-1.78974	-0.684837	-1.78974	-1.78974
RPL6--NM-000970--chr12---	-0.115082	-1.00704	1.05044	-0.376517	-1.15967	-1.59503	-0.303486	-0.284647	-1.59503	-0.240923	-0.708462	-1.59503	0.248462	-0.450611	-1.59503	-0.262598	-1.59503	1.1571	-0.621141	-0.347538	-0.128718	0.257923	-1.59503	-0.20178	-1.04176	0.562194	-0.0129738	-0.67276	-0.99039	-0.161251	0.915795	-0.821788	0.164204	-1.59503	0.198855	-1.01187	-0.487367	1.10298	0.717591	-1.59503	-0.834678	-0.572736	-0.354168	-0.0946749	-0.0210005	-1.59503	-1.59503	-1.59503	-0.181894
RPL7A--NM-000972--chr9--+	-0.272181	-0.861215	0.226168	0.380048	-1.06895	-0.910213	-0.0182005	-1.02232	-1.75459	-0.535074	0.923151	-1.75459	-0.653013	0.0157359	-1.75459	0.0268768	-1.75459	-1.75459	-1.23611	-0.85848	-0.604491	-0.0137707	1.09758	-0.68511	-0.907405	0.33686	-0.750883	-0.658494	-1.21005	-1.75459	-1.75459	-0.821039	-1.12252	-1.00736	0.744873	-0.591323	-0.499235	1.15137	-0.302214	-0.92216	-0.325672	-0.638285	-0.832824	0.208906	0.456278	-1.75459	-1.34635	-1.75459	-1.75459
RPL8--NM-000973--chr8---	0.382111	-1.62228	0.837264	0.230221	-1.62228	-0.750608	0.566362	-1.18641	-1.62228	-0.65748	0.303974	-1.62228	-1.62228	-7.90843e-05	-1.62228	-0.383493	-1.62228	0.936427	-0.716838	-0.462463	-1.62228	0.694902	0.583451	-0.518227	-0.0543867	1.41926	-0.774213	-0.764829	-1.06014	0.330775	1.46148	-0.903383	0.549335	-0.850895	0.957987	-0.706625	-0.408735	1.07834	0.949195	-0.762941	-0.147169	-1.21734	0.112097	0.129334	0.124278	0.570576	-0.64046	-1.62228	0.307704
RPL9--NM-000661--chr4---	0.156593	-1.47365	0.196861	0.550699	-0.347935	-0.866498	-0.0509434	-0.278171	-1.47365	0.0179736	0.808621	0.474901	-1.47365	0.448373	0.714016	-0.00590332	-1.47365	0.725864	-0.400857	-0.23182	-1.47365	-0.272215	-0.0356898	-0.165539	-0.437435	1.08446	0.269071	-0.132985	-1.47365	0.105736	-1.47365	-0.621879	0.917115	-1.47365	0.205121	-0.0508268	-0.657897	0.992847	1.07383	-1.47365	-0.636078	-0.993863	-0.993172	-0.421947	0.492342	-1.47365	-0.604372	-1.47365	0.813041
RPLP0--NM-001002--chr12---	0.418911	0.0452454	0.279025	1.07782	-0.888725	-0.763635	1.04634	0.0563934	-1.35896	-1.35896	-0.401373	0.551653	-1.35896	-0.609634	-1.35896	0.0802078	-1.35896	0.79773	-0.737145	-0.141311	0.0203669	-0.35044	0.741866	0.0391603	0.241549	0.766969	0.484677	-0.0443996	-0.26121	-1.35896	-1.35896	0.199797	0.985259	-1.35896	-0.0807458	-0.295193	-0.414175	1.28974	0.382892	-0.77325	-0.0220344	0.356908	-0.0186971	-1.35896	0.670114	-1.35896	-0.506611	-1.35896	-1.35896
RPLP1--NM-001003--chr15--+	-0.0472263	-0.949621	-0.420484	0.0932309	-0.835887	-0.694895	0.5874	-0.433898	-0.823585	-0.139957	0.593949	0.270518	-2	0.590511	-2	-0.0011223	-2	0.650537	-1.4435	-0.158678	-0.137914	0.145594	-0.0301811	-0.538591	-0.321987	0.741573	-0.755832	-0.40904	-0.803861	-0.253803	0.0820248	-0.122001	0.113794	-0.919436	0.294014	-0.95735	-0.944832	0.622891	0.120713	-0.710942	-0.762139	-0.625632	-0.505783	0.493508	0.082854	-2	-0.880684	-1.33052	-0.51932
RPLP2--NM-001004--chr11--+	-0.602064	-1.48925	0.339816	0.0390609	-0.458775	-1.03088	0.564862	-0.586708	0.262904	-0.363129	-0.00698797	-0.0181638	-1.48925	0.145499	-1.48925	-0.381155	-1.48925	-1.48925	-0.679332	-0.197615	-0.0103552	-0.360496	-0.403643	-0.501675	-0.706947	0.673415	-0.41677	-0.477097	-0.384108	-1.48925	-0.00574174	-0.0316104	0.575342	-0.799246	0.188516	-0.415071	-1.29963	0.590263	-1.48925	-1.03828	-0.856916	-0.639076	-0.166813	-0.695254	0.145855	-1.48925	-0.832979	-1.48925	-1.48925
RPS10--NM-001014--chr6---	-0.658156	-0.43481	0.124758	0.902959	0.0310201	-0.0345798	0.0271964	-0.203475	-1.105	-0.200458	0.790789	-1.76804	-0.71538	0.0862137	-1.76804	0.304468	-1.76804	-0.0496245	0.243091	0.0144375	-0.237614	0.460715	0.550427	-0.34676	-0.31669	1.04741	0.255696	-1.30252	-0.893367	0.925848	0.392804	0.291694	-0.0632474	-1.76804	0.275659	-0.442789	-0.497013	1.07692	-0.38016	-0.336656	-0.702797	-0.541075	-0.539809	0.108262	0.393688	-1.76804	-0.363359	-1.76804	0.676585
RPS11--NM-001015--chr19--+	-0.145286	-0.604232	-1.53719	0.692028	-0.576053	-1.0188	1.06456	-0.516489	-0.812594	-0.561192	0.986015	0.126485	-1.53719	0.311574	-1.53719	-0.284026	-1.53719	0.340758	-0.102433	0.00613219	-1.11109	0.125384	-1.53719	-0.226826	-0.143538	0.784719	-0.179095	-0.166476	-0.581316	-1.53719	0.140534	0.234501	-0.450112	-1.53719	0.360222	-0.988721	-0.148165	0.814563	-1.53719	-1.02718	-0.577156	-0.820896	-0.574583	0.234751	0.825226	-1.53719	-0.335649	-1.53719	-1.53719
RPS12--NM-001016--chr6--+	-0.435451	-1.14062	-0.272212	1.12533	-1.10975	-0.895469	0.946982	-0.071415	-0.879391	-0.437629	0.649988	-0.392439	-2	-0.128546	-2	0.446766	-0.297828	-0.187725	1.11553e-05	-0.235681	-0.59273	0.574245	-0.0295886	-0.190941	0.0108761	1.01448	-0.0473549	-0.491818	-0.677964	-0.35574	0.474007	0.194555	0.399958	-1.71053	0.88129	-0.411114	-0.970126	0.957022	-0.176847	-1.21116	-0.560052	-0.631985	-0.102803	-0.288404	0.329611	-1.0591	-1.20581	-2	-0.376816
RPS13--NM-001017--chr11---	0.074147	-0.733439	0.0251927	0.257897	-0.627837	-0.788026	0.503465	-0.562799	-0.774207	-0.139214	0.78275	0.273479	-0.798319	-0.358244	-1.83014	-1.83014	0.374236	0.491492	-1.34449	-0.376468	-0.218763	-0.0758565	0.17122	-0.312531	-1.0366	0.556962	-0.047704	-0.281401	-0.972784	-0.0580445	0.287934	0.115237	1.11735	-1.83014	0.409504	-0.999325	-0.809239	0.925666	1.01151	-1.83014	-0.0681456	-0.967758	-0.256461	-1.83014	-0.0372213	-1.83014	-1.16445	-1.83014	-1.83014
RPS14--NM-005617--chr5---	-0.190261	-1.22798	0.323143	0.436094	-0.516474	-0.354572	0.708743	-0.295577	-0.986271	-1.18481	0.207798	0.368353	-1.28942	0.0724119	-0.680041	-1.20212	-2	0.808881	-0.739044	-0.178907	-0.476453	0.299619	0.263368	-0.458218	-0.442097	1.1987	-0.131924	-0.676296	-0.346507	-1.12116	0.931057	0.12359	0.667748	-2	0.195064	-0.869831	-0.626758	0.856389	0.601358	-0.93788	-0.308977	0.14649	0.0176285	-0.0288938	0.519038	-0.382363	-1.09473	-1.12454	0.385359
RPS15--NM-001018--chr19--+	-0.237502	-1.23415	0.74154	0.737552	-0.695773	-0.498493	0.121014	0.0843399	-1.0833	-0.862273	-0.987265	0.341603	-0.708957	-0.0949654	-1.72034	-0.618597	-1.72034	-1.72034	-0.287324	-0.513959	-0.847513	0.495956	0.507213	-0.176605	-0.94252	-0.275605	-0.214744	-0.713989	-0.413164	-0.534797	0.739644	-0.863225	0.540605	-1.72034	-0.0521954	-0.652319	-0.499152	0.878084	1.06501	-1.27195	-0.696868	-0.541487	-0.405486	0.0823875	0.526875	-0.354296	-0.663983	-1.72034	0.628424
RPS15A--NM-001030009--chr16---	-0.0470211	-1.06002	0.529334	0.40884	-1.5056	-0.507629	0.61083	-0.985338	-0.571168	-0.395986	0.293534	0.513073	-0.0430667	0.321122	-1.85412	-1.85412	-1.85412	-1.85412	0.109129	-0.24618	-0.430547	0.763057	0.302472	-0.211527	0.0659498	0.930844	0.189736	-0.149796	-0.146415	-0.706344	0.155855	0.0618041	0.578923	-1.85412	0.537172	-0.820122	-0.738268	0.525447	0.842495	-1.42001	-1.03698	-0.466458	-0.581152	-1.08982	0.589121	-0.531593	-1.00873	-1.85412	-0.19233
RPS16--NM-001020--chr19---	0.238479	-0.684626	0.496499	0.898698	-0.190166	-0.349315	0.814504	-0.675565	-0.176425	-0.914923	0.200853	-0.273026	-1.82594	-0.100259	-1.82594	0.288187	-1.82594	-1.82594	-1.32054	-0.385367	0.141275	-0.129022	-0.118424	0.0721248	0.068663	0.0678727	0.103148	-1.01629	-1.29513	-0.567236	-0.259913	0.53872	0.670892	-0.65568	0.610492	-0.291031	-0.602245	0.853861	0.204295	-1.34989	-0.0876114	-0.431312	-0.302737	-0.171968	0.473138	0.244677	-0.898851	-0.570942	-0.585359
RPS18--NM-022551-4--chr6--+	-0.127521	-2	0.0628111	0.168225	-0.651347	-0.655112	0.129605	-0.395127	-1.77968	-0.295782	0.433643	0.306556	-0.667406	0.188471	-2	-0.12496	-2	0.311565	-0.446497	-0.376124	-0.374929	0.444051	0.637832	-0.383788	-0.168265	0.747904	-0.135928	-0.307321	-1.01804	-0.787917	0.320569	-0.123428	-0.0881362	-2	0.534774	-0.167962	-0.555667	0.679065	-0.629915	-2	-0.415941	-0.795161	-0.222319	-0.150083	0.518697	-0.25569	-1.40161	-2	-0.806417
RPS19--NM-001022--chr19--+	-0.596736	-0.586841	0.736903	0.568975	-0.645006	-0.528252	0.295593	-0.245996	-2	-0.677358	-0.0110311	-0.718021	-2	0.178579	-0.550095	0.0263877	-2	0.41043	-1.09731	-0.129214	-0.710757	-0.198263	0.506382	-0.694731	-0.0739624	0.444343	-0.677842	-1.668	-1.6187	-0.461356	0.688845	-0.374767	0.028847	-0.774857	0.599253	-0.363607	-0.943929	1.0041	0.519466	-1.14305	-0.470619	-0.983537	-0.856297	-0.0557334	0.356744	-0.261824	-0.95168	-0.980543	-0.480553
RPS2--NM-002952--chr16---	-0.067055	-0.239224	0.621502	0.423547	-0.505424	-0.301159	0.189764	-0.229346	-0.746139	0.259822	-0.134189	0.903203	-0.312836	0.186464	-1.48352	-1.48352	-1.48352	1.15055	-0.551407	0.00298738	0.2185	0.208392	-0.234124	0.0200375	-0.953983	0.739139	0.0306737	-0.96581	-0.51078	0.527063	0.223809	0.194038	0.892563	-0.207666	0.447375	-0.247276	-0.529883	0.863543	-1.48352	-1.48352	0.173576	-1.48352	0.301944	-0.0475228	0.476805	0.0976895	0.0786557	-1.48352	-0.131001
RPS20--NM-001023--chr8---	0.268055	-0.674574	-1.29597	0.245941	-0.215981	-0.713482	1.62751	0.0888578	-0.481772	-0.199282	0.587636	-1.29597	-1.29597	-0.562803	-1.29597	-1.29597	-1.29597	0.814204	-0.266753	0.0223935	-1.29597	0.746787	-1.29597	0.273518	-0.301845	1.45227	0.739072	-1.29597	-0.221894	-1.29597	-1.29597	0.40243	0.563208	-1.29597	-0.0453232	0.331406	-0.6714	1.1302	0.408313	-1.29597	0.0121218	-0.215598	0.0153871	-0.286986	0.950151	-1.29597	0.0541517	0.214802	0.197448
RPS21--NM-001024--chr20--+	-0.415112	-1.22804	1.46711	-0.287217	-0.186915	-1.22804	0.736196	-0.399684	-1.22804	-1.22804	0.208243	-1.22804	-1.22804	-0.521256	-1.22804	0.129417	-1.22804	-1.22804	-0.641527	-0.954266	-0.152631	0.480024	0.101868	-0.758125	-0.269689	-0.0601774	-0.841733	-0.676967	0.382532	0.912106	0.589311	-0.440275	-0.513031	-1.22804	0.599536	-0.633926	-0.625945	0.558947	1.12801	-0.675582	-1.22804	-0.784308	-0.451137	-1.22804	-0.0298244	-1.22804	-0.766237	-1.22804	-1.22804
RPS23--NM-001025--chr5---	0.183713	-1.43366	0.133338	0.281044	-0.848833	-0.749624	0.723004	-0.581263	-1.22864	-0.946988	0.613416	-2	-0.431011	-0.51606	-0.649125	-0.3159	-2	-0.640637	-0.372189	-0.446527	-0.447979	0.682978	0.28297	-0.597101	-0.323528	0.625495	-0.548915	-0.767564	-0.142944	-1.08496	-0.234888	-0.090661	0.489329	-2	0.411083	-0.458861	-0.774309	0.725897	-0.0335987	-0.533696	-0.346824	-0.487092	-0.161363	-0.49584	0.425637	-0.355017	-0.373314	-2	-2
RPS24--NM-001026--chr10--+	-0.96498	-1.15606	0.310498	-0.36331	-0.245796	-0.566878	0.33557	-0.951197	-1.69121	-0.746738	0.410009	0.578373	-1.69121	-0.103189	-1.69121	-0.478524	-1.69121	-1.69121	-0.804845	-0.122851	-0.528947	0.481364	0.468046	-0.71641	-0.835066	0.675585	-0.861011	-0.583521	-1.69121	0.620539	-1.69121	0.0232565	-0.0900778	-1.69121	0.144917	-0.0999373	-0.683092	0.64757	-0.223473	-1.69121	-0.99919	-0.563099	-0.561864	-0.325691	-0.258638	-0.187606	-1.69121	-1.69121	-0.405072
RPS24--NM-033022--chr10--+	-0.138545	-1.45336	0.500598	0.316849	-0.777	-0.620408	0.0998434	-0.48919	-0.768896	-0.903126	-0.200862	-1.45336	-0.366688	0.854463	-1.45336	-1.45336	-1.45336	0.320581	0.0863345	0.146353	-1.45336	0.888368	0.654388	-0.057703	0.0448848	-0.434936	-0.463235	-0.633997	-1.45336	-1.45336	1.18976	-0.171236	-1.45336	-1.45336	0.140363	-0.0852885	-0.676246	0.177224	-1.45336	-0.971595	-0.546498	-0.0420082	-0.544066	0.48357	0.0424119	-1.45336	-1.05065	-0.183313	-0.197902
RPS25--NM-001028--chr11---	-0.451556	-0.710541	0.339925	0.579926	-0.065867	-0.757874	0.241296	-0.629373	-1.57358	-0.670726	-0.0228892	-1.57358	-1.57358	0.571907	-1.57358	-1.57358	-1.57358	0.163634	-0.246345	-0.145915	-0.462532	0.719667	0.118636	-0.28149	0.183003	0.688925	-0.451589	0.158356	-0.41742	-1.57358	1.01482	-0.318001	0.458605	-1.57358	0.18164	-0.233833	-0.812555	0.825713	0.832792	-0.769416	-0.685494	-1.57358	-0.493998	0.0655711	0.399026	-0.136231	-1.17921	-1.57358	-1.57358
RPS27--NM-001030--chr1--+	-0.420246	-1.45047	0.0140418	-0.273733	-0.463575	-0.257471	0.411457	-0.665263	-1.45047	-1.45047	0.779082	0.257796	0.329821	-0.345286	-1.45047	-1.45047	-1.45047	-1.45047	-0.894509	-0.361778	-0.431077	0.073978	0.427865	0.144387	-0.91617	-0.343439	-0.205077	-0.55982	-0.468979	-0.0658463	-1.45047	-0.449428	0.645481	-0.649219	0.0212832	-0.887304	-0.879739	0.79305	0.106908	-1.45047	-0.716187	-0.463225	-1.02925	-0.52846	0.0695961	1.26761	-1.01272	-1.45047	0.55424
RPS27A--NM-001177413--chr2--+	-1.04987	-0.428113	-1.04987	0.492944	-0.244843	-0.0584614	0.578336	-0.554123	-1.04987	-1.04987	-0.112388	-1.04987	-1.04987	0.513889	-1.04987	0.359083	-1.04987	-1.04987	-0.0200525	-0.15345	-0.570807	0.619354	1.00685	-0.202417	-1.04987	0.162296	-0.648911	-0.0746357	-1.04987	-1.04987	-1.04987	0.476161	0.810397	-1.04987	0.561655	-0.433221	-0.603557	0.664945	-1.04987	-0.476457	-1.04987	-0.589308	-0.588644	-1.04987	0.0192547	-1.04987	-1.04987	-1.04987	-1.04987
RPS27A--NM-002954--chr2--+	-0.318539	-1.05814	0.723941	0.454584	-0.367964	-0.51156	0.538526	-1.47253	-1.23363	-0.771293	0.402598	-0.442726	-1.84389	-0.6725	-0.270783	-1.84389	-1.84389	-1.84389	-0.329288	0.125541	-0.682415	0.279239	0.0353545	-0.740288	-0.670142	0.551973	-0.590734	-0.689461	-1.36495	-0.17992	0.512682	-0.455533	0.489143	-1.84389	0.354451	-0.820766	-0.809968	1.01727	-0.0120508	-1.41435	0.215288	-0.367562	-1.03317	-0.116945	0.189008	-0.535271	-0.551024	-1.84389	-0.199576
RPS3--NM-001005--chr11--+	-0.724114	-0.610136	1.20774	-0.313716	-0.744991	-0.642665	0.0114864	-1.12965	-1.12965	-1.12965	-1.12965	-1.12965	-1.12965	-0.516689	-1.12965	-1.12965	-1.12965	-1.12965	-1.12965	-0.380639	-0.196996	0.0695608	0.0237211	-0.562076	-1.12965	-0.116814	-0.144958	-1.12965	-1.12965	0.137158	-1.12965	-1.12965	-1.12965	-1.12965	-0.0840501	-1.12965	-0.928191	0.559633	-1.12965	-1.12965	-1.12965	-0.744824	-0.455878	-0.286093	0.0389697	-1.12965	-0.729151	-1.12965	0.118919
RPS3--NM-001256802--chr11--+	-0.746026	-0.314639	0.841238	-0.384701	-1.05753	-1.43156	0.0704347	-0.499179	-0.35616	-0.899467	0.34844	0.0881622	-1.43156	-0.448357	-1.43156	-1.43156	-1.43156	-1.43156	-0.333068	-0.703246	-0.753912	0.087156	0.239459	-0.74303	-0.367036	0.563571	-0.474079	-0.639212	-0.912097	-1.43156	0.100995	-0.767246	0.433057	-1.43156	0.301675	-0.585427	-0.795337	0.632186	-1.43156	-0.965679	-1.05805	-1.05737	-1.05683	-0.611313	0.0148966	0.594799	-1.43156	-1.43156	-1.43156
RPS3A--NM-001006--chr4--+	-0.100341	-1.40942	0.973513	-0.627289	-0.657618	-1.09552	0.695432	-0.760756	-1.2456	-1.00558	-0.336962	-1.93739	-0.839085	0.276912	-1.93739	-1.93739	-1.93739	-1.93739	-0.0790695	-0.542787	-1.22914	-0.273565	-0.765239	0.0504998	-0.824787	0.778568	0.0357311	-0.28886	-1.02479	-0.0511112	-1.93739	-0.64154	-0.15867	-1.93739	0.327486	-1.93739	-0.475073	0.701705	-0.489326	-1.45047	-0.658907	-1.5463	0.0318464	-1.93739	-0.0289464	-1.93739	-0.98914	-1.93739	-0.073393
RPS4X--NM-001007--chrX---	0.267921	-2	-0.590634	0.20358	-0.523991	-1.12922	-0.568983	-0.782386	-1.2847	-0.306922	-0.0739839	-0.355821	-2	0.292678	-2	-0.761875	0.42955	0.558859	-1.09543	-0.132831	-0.637327	0.317185	0.205665	-0.797229	-0.432566	0.00542461	-0.119767	-0.645602	-0.765179	-2	0.334377	0.22508	0.308094	-2	0.0528927	-0.799814	-0.970976	0.838326	-2	-0.29067	-0.15934	-0.675119	-0.26598	0.440618	-0.253791	0.192782	-0.346516	-2	0.336784
RPS5--NM-001009--chr19--+	-0.19464	-1.01045	0.46336	-0.213779	0.0367649	-1.54824	0.604875	-0.555629	-1.54824	-0.981776	0.74666	0.0696547	-1.54824	-0.195662	-1.54824	0.260965	-1.54824	-1.54824	0.200639	-0.638179	-0.582776	0.3538	1.15153	-0.111412	0.298394	1.03992	-1.20143	-0.435079	-0.33281	-1.54824	0.0833165	-0.399812	0.722391	-1.54824	0.471487	-0.647449	-0.748203	1.07631	1.28864	-1.54824	-0.41614	-0.85166	0.266428	-0.675007	0.462352	-0.0372063	-1.13365	-1.54824	-1.54824
RPS6--NM-001010--chr9---	-0.191039	-1.15276	-0.674104	0.000763664	-0.75738	-0.523072	-0.462602	-0.862196	-0.595501	-0.822297	0.390198	-0.443772	0.00649721	-0.0918366	-2	-0.252899	-2	-2	-1.16926	-0.726596	-0.569073	0.427258	-2	-0.295341	-0.215556	0.92736	-0.396377	-0.241408	-1.13053	0.559347	0.656901	-0.458527	-0.0774361	-1.30084	0.364762	-1.15924	-0.785983	0.769343	0.0523853	-1.21451	-0.61012	-1.12509	-0.606883	-1.18673	0.505978	0.0943612	-0.434645	-2	-0.163653
RPS7--NM-001011--chr2--+	-0.687831	-1.70017	-0.261086	0.648684	-0.347685	-0.527883	0.533738	-0.115741	-1.70017	-0.173702	0.490668	-0.0215642	-1.70017	-0.296836	-1.70017	-1.70017	-1.70017	0.194631	-0.0555743	-0.411959	0.112485	0.616008	0.551181	-0.471823	0.0679747	0.642577	-0.476399	-0.317155	-0.43913	-0.339586	-0.00738983	-0.0369076	0.894597	-1.70017	0.693385	-0.765574	-1.13934	0.970951	1.70661	-0.823056	-0.349047	-1.28685	-0.191183	-0.794167	0.735259	-0.132435	-0.95132	-1.70017	0.269731
RPS8--NM-001012--chr1--+	-0.658977	-1.02281	-0.122577	0.222987	-0.838556	-0.660664	0.300148	0.0114196	-1.188	-0.404334	0.108368	-1.76243	-1.76243	0.0762283	-1.76243	0.466866	-1.76243	0.289565	-0.470247	-0.173639	-0.0916554	0.654178	-0.31222	-0.0746357	-0.257057	0.422816	-0.124037	-0.675775	-0.58372	-1.76243	-1.76243	0.294652	-0.900633	-1.76243	0.217099	-0.324791	-1.01953	1.14028	-1.76243	-1.76243	-0.0608969	-1.00021	-0.999309	0.326078	0.190199	-1.76243	-1.42446	-0.696548	-0.708792
RPS9--NM-001013-5--chr19--+	0.405779	-0.52722	1.26775	0.411505	-0.551256	-0.284324	0.790663	-0.770112	-1.46472	-0.467245	0.851211	0.170711	-2	0.486879	-2	0.396098	-2	0.415977	-0.748124	-0.0675099	-0.804306	0.642321	-0.349999	-0.628579	0.0803886	0.674638	0.102902	-0.453536	-1.62206	-0.835181	0.186973	0.0754739	0.992225	-0.586855	0.639032	-0.0823401	-0.72022	1.23212	1.001	-2	0.129709	-0.842859	0.133762	-0.407882	0.628588	0.0425254	-0.983454	-2	0.189428
RPSA--NM-002295--chr3--+	-1.21735	-0.12555	0.451771	0.611967	0.146447	-1.21735	-0.13346	0.224908	-0.369388	-1.21735	-1.21735	-1.21735	-1.21735	0.042241	-1.21735	-1.21735	-1.21735	-1.21735	-0.583715	-0.122207	-1.21735	-0.386034	-1.21735	-0.510318	-1.21735	-0.452293	0.00928775	-0.622002	-0.0987326	-1.21735	0.746021	-1.21735	-0.444894	-1.21735	0.0851617	-0.575503	-1.21735	0.666279	1.82686	-0.200031	-0.380479	-0.379104	-1.21735	-0.166524	-0.312549	-1.21735	-0.348799	0.356076	-1.21735
S100A11--NM-005620--chr1---	-0.841097	-0.841097	-0.841097	-0.841097	-0.841097	-0.841097	-0.841097	-0.841097	-0.841097	-0.841097	0.0398078	-0.841097	-0.841097	-0.841097	-0.841097	-0.841097	-0.841097	-0.841097	-0.269074	-0.841097	-0.841097	-0.841097	-0.841097	-0.841097	-0.841097	1.97056	-0.464334	-0.841097	-0.841097	0.583523	-0.841097	-0.841097	-0.143753	-0.841097	-0.841097	-0.841097	-0.841097	0.458859	-0.841097	-0.841097	-0.409124	-0.841097	-0.841097	0.107547	-0.841097	-0.841097	-0.841097	-0.841097	-0.841097
S100A6--NM-014624--chr1---	-0.772349	-0.772349	-0.772349	-0.772349	-0.772349	-0.772349	-0.255482	-0.772349	-0.772349	-0.772349	-0.772349	0.795636	-0.772349	-0.772349	-0.772349	-0.772349	-0.772349	-0.772349	-0.772349	-0.534146	-0.772349	-0.772349	-0.772349	-0.772349	-0.772349	0.776431	-0.772349	-0.772349	-0.772349	-0.772349	-0.772349	-0.772349	-0.772349	-0.772349	-0.772349	-0.772349	-0.772349	0.156506	-0.772349	-0.772349	-0.772349	-0.772349	-0.772349	-0.772349	-0.772349	-0.772349	-0.370548	-0.772349	-0.772349
SAA2--NM-030754--chr11---	1.26894	2	-0.532919	2	0.493879	0.409111	1.7046	-0.0618614	2	0.0893709	0.35787	2	-0.532919	0.616949	-0.532919	1.45458	-0.532919	1.47333	-0.532919	2	-0.0777144	-0.228583	0.778687	0.112525	2	0.618872	1.82979	1.95205	-0.532919	2	2	2	1.45742	-0.532919	-0.532919	0.0530181	1.42122	0.6573	-0.532919	2	0.4927	-0.095294	2	0.42637	0.482956	-0.532919	1.61758	0.903445	-0.532919
SAA4--NM-006512--chr11---	1.78825	1.57605	2	1.59508	0.523581	0.519636	0.578841	1.2738	0.0297785	0.912888	1.8617	1.84546	1.16039	-0.781969	-0.781969	1.75536	-0.781969	2	1.54659	2	0.762982	0.881257	2	1.65365	2	-0.0495851	0.576799	1.31546	-0.781969	2	2	0.738578	2	-0.781969	1.34366	1.41605	1.3808	0.596511	1.65468	-0.210614	0.522186	1.52683	1.30849	0.798851	0.611615	1.70314	0.937754	-0.781969	2
SERF2--NM-001018108--chr15--+	0.945737	0.225651	1.79404	0.983615	0.576823	-0.327198	1.54657	0.288756	-0.309879	0.0673946	1.64139	1.00314	-1.63324	0.444949	0.466384	0.458028	-1.63324	0.477755	-0.0204356	0.347674	-0.0830226	1.41445	0.874986	0.26872	-0.323263	0.213985	0.291801	0.471341	0.261335	-1.63324	0.252683	0.484188	2	-0.756066	1.30089	0.405249	0.481092	1.10708	0.811714	-1.05994	0.574999	-0.552448	0.579254	-0.0470313	0.83311	0.113371	-1.15401	-0.12188	2
SERPINA1--NM-000295-1--chr14---	1.80949	0.144209	1.23293	0.936751	0.0410702	-0.16173	1.3416	1.30897	0.133284	0.102423	1.24693	1.83721	-0.0600276	0.945576	0.385208	0.0759002	1.02536	2	1.11527	1.31165	1.0309	0.852217	2	1.31656	1.14711	0.732063	0.833478	0.533902	-0.0478988	1.6465	1.85525	0.964206	2	-0.926131	1.18678	-0.539011	1.42307	1.24418	2	0.230242	0.492201	0.693484	0.740397	0.715888	1.00514	1.92888	0.834306	-2	2
SERPINA1--NM-001002235--chr14---	2	1.08129	1.32398	1.02928	0.473743	1.10596	1.20706	1.37702	-0.275704	0.773105	0.821919	2	1.03557	0.201564	0.906335	1.53466	-0.151733	2	1.37934	1.38616	1.18784	1.13855	2	1.84531	0.496623	0.596889	1.46582	0.0959683	0.297486	1.12818	1.72426	1.33753	1.81657	-0.0489442	1.09876	0.251368	1.24224	0.889681	1.24051	0.0990557	1.09599	0.439014	1.63195	-0.526072	1.12522	1.99077	1.38335	-0.599198	1.63884
SERPINA3--NM-001085--chr14--+	2	1.34957	0.574555	1.0859	0.276571	0.942083	0.00339271	1.17122	1.20873	0.400113	1.64079	2	0.925801	-0.309227	-1.05444	1.53238	1.75253	2	0.807188	1.29584	0.997427	0.267619	1.03486	2	1.39882	1.05982	1.4715	0.917666	1.52736	2	2	0.294324	1.75403	-1.05444	1.11264	0.333022	1.44966	0.736549	1.91659	-1.05444	0.649873	1.5804	1.19354	0.557209	0.862694	1.96892	1.35335	-1.05444	0.46352
TF--NM-001063--chr3--+	1.6989	1.76759	0.200558	0.951339	1.03142	1.59465	0.555544	1.48185	1.37086	1.21858	0.79546	0.906184	0.681662	0.515579	-0.657557	0.211424	-0.114718	0.71823	1.43959	1.38844	1.12511	0.904892	0.90135	1.70532	0.814401	-0.0220902	1.66471	0.633831	0.207102	-0.178	1.36042	1.05354	1.55187	0.212157	1.09923	1.47821	1.98862	0.767332	0.539165	0.715197	1.57564	0.916589	1.77799	-0.745809	1.16358	0.939964	1.50061	-0.562655	1.23497
TIMP1--NM-003254--chrX--+	-0.456772	-0.878024	1.14051	-0.380842	-0.878024	-0.878024	-0.878024	0.32462	-0.878024	-0.309605	-0.0643494	1.41063	-0.878024	-0.241311	-0.878024	-0.878024	-0.878024	0.954542	-0.878024	0.628002	0.294008	-0.878024	1.29938	-0.454696	-0.878024	0.481255	-0.0408466	-0.878024	-0.878024	0.43787	0.759156	-0.471416	1.11389	-0.878024	0.208091	-0.342811	0.232679	0.267284	1.96863	-0.878024	-0.180188	0.0602168	-0.878024	-0.878024	-0.123544	0.638218	0.754627	-0.878024	0.418924
TMSB10--NM-021103--chr2--+	-0.606263	-1.19484	-0.0762418	-0.513665	-1.19484	-0.788282	-0.468445	-0.228279	-1.19484	-0.738001	-0.540891	-1.19484	-1.19484	-0.350696	-1.19484	-1.19484	-1.19484	-1.19484	-0.770192	-0.99662	-0.860662	-0.971417	-0.231961	-0.85461	-1.19484	-0.349285	-0.37278	-1.19484	-1.19484	-1.19484	0.657184	-1.19484	-0.677158	-1.19484	-0.662715	-1.19484	-0.883507	0.0013396	0.510986	-0.794848	-0.874159	-1.19484	-0.873104	-0.0881528	-0.588465	-1.19484	-0.612759	-1.19484	-1.19484
TMSB4X--NM-021109--chrX--+	-1.28347	-0.967002	-1.78637	-0.62814	-1.51198	-0.614949	-0.684512	-0.960497	-1.78637	-1.13234	-0.480569	-0.214712	-1.01548	-0.854333	-0.534697	-1.78637	-1.78637	-1.78637	-0.824911	-0.605465	-1.12109	-1.01068	-0.963643	-1.03794	-1.00544	0.321414	-0.638774	-1.78637	-0.790014	-0.882726	0.088684	-0.599124	-0.221719	-1.26345	-0.655767	-1.41883	-1.31964	-0.195614	-0.0431756	-1.20383	-0.695172	-1.14207	-0.784162	-1.18464	-1.14915	-0.745144	-1.1208	-0.885386	-0.895736
TPT1--NM-003295--chr13---	0.119607	-1.28841	0.252862	0.951755	-0.745369	-0.249278	0.900662	-0.863089	-0.59286	-1.07152	0.81838	-0.503319	-2	0.131299	-0.221647	-0.231755	-0.878829	0.929673	-0.731388	-0.220257	-0.0718228	0.447569	0.261302	-0.162251	-0.379794	1.29743	0.0786581	-0.345673	-0.560938	-2	-0.483645	0.449124	0.450508	-1.88079	0.996064	-0.618039	-0.537935	0.740857	-0.712073	-1.91597	-0.0911982	-0.744731	-0.224117	0.0236148	0.264167	-1.15671	-1.18202	-2	-0.987703
TTR--NM-000371--chr18--+	0.964788	-0.23232	2	0.766404	1.12795	1.00183	0.710011	0.834445	-0.208193	0.750596	1.29927	2	-0.0424468	0.502464	0.252496	1.65706	-2	1.81683	1.15631	1.1624	1.06798	1.1082	2	0.943191	1.80962	0.352481	0.867017	1.61343	-0.375035	1.29624	2	0.830741	2	-1.20279	1.26533	0.955141	0.96307	0.642086	2	-0.243363	0.828796	0.543735	0.379063	0.256483	0.730464	1.40201	0.421531	-0.613109	0.992815
UBA52--NM-003333--chr19--+	-0.152781	-1.40961	1.16854	0.532226	-1.40961	-0.4959	1.19714	-0.617214	-0.658784	0.70025	-0.0356779	0.31429	-1.40961	-0.29431	-1.40961	-1.40961	-1.40961	-1.40961	0.0770841	-0.193861	-0.165075	0.0255208	0.485914	-0.783569	-0.870416	-0.732191	-0.152818	-1.40961	-0.419134	-0.0123137	0.328847	0.298532	0.520892	-0.601024	0.556488	-0.841287	-0.833652	0.654388	0.162021	-0.221145	-0.414824	-1.40961	0.408405	0.426474	0.32972	-1.40961	-1.40961	-0.0164277	-0.0324314
UBC--NM-021009--chr12---	-0.877135	-0.385341	-1.65866	-1.12808	-0.913015	-0.44872	-0.694135	-1.19948	-0.904081	-0.332408	-0.277856	-1.65866	-1.65866	0.451597	-1.65866	-0.353638	-1.65866	-1.65866	0.038761	-0.0514706	-1.21493	-0.744145	-0.380122	-0.120032	-1.65866	1.11287	-0.999814	-0.755363	-0.357116	-1.65866	0.0884933	-0.643403	-0.526598	-0.353047	-0.499589	-1.65866	-0.573783	0.249854	-1.65866	-1.12754	-0.44635	-1.23207	0.0407164	-0.723558	-0.853501	-1.65866	-0.885759	-1.65866	-1.65866
VTN--NM-000638--chr17---	1.44272	0.937186	1.9572	0.651523	1.20539	0.737826	0.324917	1.1945	0.757503	0.810927	0.45364	1.33351	0.899968	0.15925	1.74421	0.852893	0.540016	1.33909	1.33559	1.17939	1.34332	0.853477	2	1.47521	1.24645	1.31079	1.10512	0.579566	0.462851	1.94304	0.455066	0.606804	2	-0.522931	0.464614	0.804998	1.1689	1.13617	2	0.895457	1.35037	0.920074	1.20761	0.180524	0.841461	1.5518	1.04554	0.110298	1.53755
[truncated: 398 more columns]
