# Supplementary material for: Long-read single-cell sequencing reveals expressions of hypermutation clusters of isoforms in human liver cancer cells
Source: eLife. 2024 Jan 11;12:RP87607. doi: 10.7554/eLife.87607 (PMC10945587; doi:10.7554/eLife.87607)
Supplement: Supplementary file 11. [file elife-87607-supp11.xlsx]

## Sheet: in
Supplemental table 11: Isoforms with SD>=1.4
Cell	N_AAAGGATGTGTACAGG	N_AACCTTTCAGAAGCGT	N_AACGTCACAGAGACTG	N_AAGACTCAGGGAGAAT	N_AAGCGTTAGGTGCGAT	N_AATGGAAGTATAGGGC	N_AATGGCTTCCCGAACG	N_ACACTGAGTATTCCGA	N_ACACTGATCACTGGTA	N_ACCTACCAGCTGACTT	N_ACCTGTCCAAAGAGTT	N_ACGGAAGAGCAAACAT	N_ACGTACACATCAGCAT	N_ACGTACATCGCAACAT	N_ACGTAGTAGGCCCAAA	N_AGAAATGAGGGCGAGA	N_AGAACAATCGCGCTGA	N_AGACAAAGTATTGCCA	N_AGCGTCGCAGTTGGTT	N_AGGAGGTGTTAGCTAC	N_AGGCATTAGTAAGCAT	N_AGGGTCCCACGGCGTT	N_AGTCAACTCCTCTGCA	N_ATACCTTTCCGGGACT	N_ATAGAGATCAGTCAGT	N_ATCCGTCAGAAACACT	N_ATCTTCAGTTCCCACT	N_ATGCCTCGTGTGTCGC	N_ATGCCTCTCATGCCAA	N_ATTCAGGTCGCTGTTC	N_CAACAGTCACCCTAAA	N_CAACAGTCACCTCGTT	N_CAACAGTTCGATGCTA	N_CAACGATTCCGGACGT	N_CAAGAGGCAATAGTCC	N_CAATTTCGTGGACTGA	N_CAATTTCTCATCCCGT	N_CACACAACACGAAGAC	N_CACGAATTCATCGCTC	N_CACTGTCCAGTCTTCC	N_CAGATACCAAGTAGTA	N_CAGATACGTTAGCTAC	N_CAGATACTCGGCTGAC	N_CAGATTGGTGAAGCGT	N_CAGGTATAGAGAGCAA	N_CATAAGCCACTTACAG	N_CATCCACAGATCACCT	N_CATGAGTCATTGGATC	N_CATTCATAGAACTCCT
Group	Normal	Normal	Normal	Normal	Normal	Normal	Normal	Normal	Normal	Normal	Normal	Normal	Normal	Normal	Normal	Normal	Normal	Normal	Normal	Normal	Normal	Normal	Normal	Normal	Normal	Normal	Normal	Normal	Normal	Normal	Normal	Normal	Normal	Normal	Normal	Normal	Normal	Normal	Normal	Normal	Normal	Normal	Normal	Normal	Normal	Normal	Normal	Normal	Normal
Cluster	A	A	A	A	A	A	A	A	A	A	A	A	A	A	A	A	A	A	A	A	A	A	A	A	A	A	A	A	A	A	A	A	A	A	A	A	A	A	A	A	A	A	A	A	A	A	A	A	A
APOA1--NM-000039--chr11---	1.53978	0.90234	2	0.283092	0.51993	1.00146	0.79843	1.0683	1.18861	0.220631	1.29994	2	0.2874	0.51731	0.614931	2	0.527907	1.97262	1.38583	1.65015	1.28212	1.08574	2	1.52816	1.4415	-0.248255	1.14975	1.21211	0.198887	1.68634	2	0.433279	2	0.387937	0.46565	0.570297	2	0.774304	2	0.86519	0.769783	0.84171	0.968856	0.536064	0.566379	1.95979	1.34528	0.173101	1.44104
APOA2--NM-001643--chr1---	0.913398	0.0782935	2	1.98778	0.525814	0.459668	1.34397	0.657455	0.425279	0.389471	1.96428	1.35291	-0.0043078	0.518761	-0.358583	1.88867	-2	1.96129	0.997548	1.17788	0.886495	1.05119	2	1.09763	0.997407	0.221191	1.57857	0.831113	-0.126452	1.78652	2	0.795786	2	-1.37662	1.92079	0.664897	0.902116	0.554889	2	-0.140707	0.70397	0.804706	0.350191	0.688996	0.783504	1.34242	0.687135	-0.269963	1.48859
APOC1--NM-001645--chr19--+	0.892185	0.193952	2	1.96064	0.784537	0.669177	1.62166	0.867429	-0.0761152	0.25314	1.8588	1.1059	0.434274	0.619669	-0.831698	1.57419	-2	1.23364	0.744062	0.953728	0.982398	1.89392	1.75218	1.30628	1.22666	0.343128	1.24029	0.887506	0.385753	1.465	2	1.37841	2	-0.837113	1.65709	0.782996	1.01047	0.944879	1.52231	-0.19548	1.08101	0.909404	1.15559	0.693163	1.45731	0.898327	0.449399	0.192919	1.09341
APOC3--NM-000040--chr11--+	1.14789	0.539462	2	1.95604	1.05053	0.829906	1.31401	1.05965	0.7125	0.986997	1.83712	1.48989	0.211161	0.445897	0.319857	2	-0.0686033	1.77659	1.5746	1.19151	1.24157	1.01781	1.75713	1.29325	1.33228	0.306451	1.46204	0.769235	0.430081	0.886725	2	1.30529	2	-0.200361	1.72617	1.00157	1.60447	0.924079	1.45107	0.325763	1.17133	1.1415	0.977375	0.323185	1.11773	1.65179	0.485793	-0.402592	1.6018
HBA2--NM-000517--chr16--+	-0.0945065	-0.452842	-0.452842	-0.452842	-0.452842	-0.452842	-0.452842	-0.452842	-0.452842	-0.452842	-0.452842	-0.452842	-0.452842	-0.452842	-0.452842	-0.452842	-0.452842	-0.452842	-0.452842	-0.452842	-0.452842	-0.452842	-0.452842	-0.452842	-0.452842	-0.452842	-0.452842	-0.452842	-0.452842	-0.452842	-0.452842	-0.452842	-0.452842	-0.452842	-0.452842	-0.452842	-0.452842	-0.334489	-0.452842	-0.452842	-0.452842	-0.452842	-0.452842	-0.452842	-0.452842	-0.452842	-0.452842	-0.452842	-0.452842
HBB--NM-000518--chr11---	-0.785999	-0.785999	-0.785999	-0.785999	-0.785999	-0.785999	-0.785999	-0.785999	-0.785999	-0.785999	-0.785999	0.394568	-0.785999	-0.322989	-0.785999	-0.785999	-0.785999	-0.785999	-0.785999	-0.606651	-0.785999	-0.785999	-0.785999	-0.785999	-0.785999	-0.785999	-0.785999	-0.785999	-0.785999	-0.785999	-0.785999	-0.490319	-0.785999	-0.785999	-0.785999	-0.785999	-0.785999	-0.684823	-0.785999	-0.785999	-0.495848	-0.785999	-0.785999	-0.785999	-0.384875	-0.785999	-0.483475	-0.785999	-0.785999
HSP90AA1--NM-005348--chr14---	-0.914292	-0.825625	-1.22977	-0.857427	-0.706499	-0.85093	-0.552895	-0.907532	-0.128221	-0.516501	-0.260763	-1.22977	-1.22977	1.517	-1.22977	-1.22977	-1.22977	0.142657	-0.350937	-0.372326	-0.918376	-1.22977	-0.33253	-1.22977	-0.583207	0.252965	-0.969145	-1.22977	-1.22977	-1.22977	-1.22977	-0.698295	-0.435322	-1.22977	-1.22977	-1.22977	-0.720769	0.596226	-1.22977	-1.22977	-0.930953	-0.930402	-0.92997	1.06217	-0.664733	-0.0942418	-1.22977	-1.22977	-1.22977
HSPA1A--NM-005345-3--chr6--+	-1.04639	-1.34591	-0.356291	-0.74328	-0.849108	-0.986234	-0.9654	-0.81532	-0.300082	-1.34591	-0.425919	-1.34591	-1.34591	0.625969	-1.34591	-1.34591	-1.34591	-1.34591	-0.970229	-1.34591	-0.657073	-1.34591	-1.34591	-0.822926	-1.34591	0.265135	-1.09847	-1.34591	-0.951344	-1.34591	-1.34591	-0.84132	-1.34591	-1.34591	-1.34591	-1.34591	-0.494128	-0.492149	-1.34591	-0.742744	-1.06221	-1.06169	-1.06128	0.0768135	-1.34591	-1.34591	-0.830948	-0.413029	-1.34591
MALAT1--NR-002819--chr11--+	-1.37463	-0.444709	0.190266	-0.51358	-1.39154	-0.261528	-0.451867	-0.141045	-0.556102	-0.399479	-0.427481	-1.70314	-1.70314	1.18728	-0.281737	-1.70314	0.167121	-1.70314	-1.2911	-0.591537	-0.0321182	-1.16255	-1.70314	-0.320682	-0.642584	1.5937	-0.780145	-0.278382	-1.27039	-0.676958	-1.70314	-0.3549	-1.20083	-0.749062	-0.419224	-0.998246	-0.836972	1.60596	-1.70314	0.321111	-1.15894	-0.369184	-1.15735	-1.01981	-0.576578	-1.70314	0.696674	-0.679979	-1.70314
ORM1--NM-000607--chr9--+	2	0.981639	1.15324	0.635565	0.658071	1.11298	0.46674	1.1386	0.556189	0.43098	0.586624	2	2	0.166387	0.182067	1.39401	-1.35379	2	1.88985	1.9418	1.41522	0.93195	2	1.77621	0.582618	0.834582	1.04661	1.1368	0.295944	1.50655	1.8707	0.497094	1.96035	-0.712143	0.877729	0.785654	1.6163	0.823048	1.69682	0.48027	0.478272	1.25755	1.25913	0.676269	0.346233	1.85118	1.61153	0.266858	1.59611
PTMA--NM-002823--chr2--+	-1.05978	-0.962437	-1.40613	-0.151956	-1.07761	-0.990219	-0.0868905	-1.05236	-1.40613	-0.623064	-0.3423	-1.40613	-1.40613	-0.882629	-1.40613	-0.400686	-1.40613	0.100597	-0.671241	0.00775168	-0.442492	-0.294914	-0.42109	-0.510041	-0.471133	0.876278	-0.565151	-0.997962	-0.213206	0.179041	-1.40613	-1.07182	-0.533941	-1.40613	-0.256128	-0.966083	-0.654271	0.532967	-0.189221	-1.40613	-0.635872	-0.831432	-1.07699	0.239035	-0.952601	-1.40613	-0.442104	-1.40613	-1.40613
RPL10--NM-006013--chrX--+	-0.0260129	-1.44309	-0.0324909	0.100473	-0.824028	-0.528799	0.219025	-0.761621	-1.00922	-1.41058	0.133312	-0.0469233	-1.27884	-0.067629	-2	-0.436893	-0.29128	0.39243	-0.789338	-0.0197745	0.0371876	0.174945	0.348378	-0.323692	0.0334581	0.410546	-0.426905	-0.63524	-1.71829	-0.65536	0.401011	-0.283041	0.238881	-2	0.365466	-0.247351	-0.806868	0.820373	0.537322	-1.7626	-0.663868	-0.590999	-0.24899	-0.8093	0.20951	-0.148156	-0.883981	-2	0.210706
RPL13--NM-000977--chr16--+	-0.295592	-0.622026	-0.200487	0.510164	-0.710387	-0.805005	0.860366	-0.641114	-0.614288	-0.99713	0.146731	-2	-0.816651	-0.338372	-2	0.0641618	-2	0.514019	-0.43759	-0.28917	-0.866739	0.300034	-0.163216	-0.387071	-0.0993754	1.04753	0.119845	-0.597285	-0.856189	-0.619042	1.27868	-0.113297	1.13693	-1.59556	0.381095	-1.24064	-0.696486	0.887249	0.670702	-0.820146	-0.291364	-0.549443	-0.54806	-0.557958	0.404627	-0.0705604	-0.764934	-1.13468	-0.0505891
RPL17--NM-001035006--chr18---	-0.503595	-0.885861	-0.474959	0.104381	-0.546447	-0.695204	-0.028832	-0.354975	-1.66294	-1.66294	0.763461	-1.66294	-1.66294	0.0248884	-1.66294	-0.619155	-1.66294	-0.0987581	-1.21196	-0.446267	-0.166571	0.436773	-0.640337	-0.309804	-0.692288	0.7065	-0.0077206	-0.362286	-0.424527	-1.66294	0.303962	-0.403989	0.0372506	-1.66294	0.31297	-0.891421	-0.714902	1.04926	-0.399627	-1.66294	-0.863309	-1.32174	-0.108696	-0.487609	0.538083	-0.368756	-0.662153	-1.66294	-1.66294
RPL28--NM-000991--chr19--+	-0.768126	-0.571698	0.258075	0.55648	-0.806384	-0.6258	0.280285	-0.752428	-1.16111	-0.719335	0.60013	-1.74424	-0.348927	0.312425	-1.74424	-0.247061	-1.74424	0.338804	-1.00712	-0.381371	-0.298458	0.0625228	0.294791	-0.38259	-0.622681	0.673452	-0.144979	-0.823059	-0.738428	0.426637	0.156167	-0.417614	0.79838	-1.74424	0.516698	-0.578716	-0.75629	0.505611	0.00614947	-1.04465	-0.163319	-0.665156	-1.16705	0.375869	-0.0281582	0.0409654	-0.944937	-1.74424	-0.674656
RPLP1--NM-001003--chr15--+	-0.0472263	-0.949621	-0.420484	0.0932309	-0.835887	-0.694895	0.5874	-0.433898	-0.823585	-0.139957	0.593949	0.270518	-2	0.590511	-2	-0.0011223	-2	0.650537	-1.4435	-0.158678	-0.137914	0.145594	-0.0301811	-0.538591	-0.321987	0.741573	-0.755832	-0.40904	-0.803861	-0.253803	0.0820248	-0.122001	0.113794	-0.919436	0.294014	-0.95735	-0.944832	0.622891	0.120713	-0.710942	-0.762139	-0.625632	-0.505783	0.493508	0.082854	-2	-0.880684	-1.33052	-0.51932
RPS18--NM-022551-4--chr6--+	-0.127521	-2	0.0628111	0.168225	-0.651347	-0.655112	0.129605	-0.395127	-1.77968	-0.295782	0.433643	0.306556	-0.667406	0.188471	-2	-0.12496	-2	0.311565	-0.446497	-0.376124	-0.374929	0.444051	0.637832	-0.383788	-0.168265	0.747904	-0.135928	-0.307321	-1.01804	-0.787917	0.320569	-0.123428	-0.0881362	-2	0.534774	-0.167962	-0.555667	0.679065	-0.629915	-2	-0.415941	-0.795161	-0.222319	-0.150083	0.518697	-0.25569	-1.40161	-2	-0.806417
RPS19--NM-001022--chr19--+	-0.596736	-0.586841	0.736903	0.568975	-0.645006	-0.528252	0.295593	-0.245996	-2	-0.677358	-0.0110311	-0.718021	-2	0.178579	-0.550095	0.0263877	-2	0.41043	-1.09731	-0.129214	-0.710757	-0.198263	0.506382	-0.694731	-0.0739624	0.444343	-0.677842	-1.668	-1.6187	-0.461356	0.688845	-0.374767	0.028847	-0.774857	0.599253	-0.363607	-0.943929	1.0041	0.519466	-1.14305	-0.470619	-0.983537	-0.856297	-0.0557334	0.356744	-0.261824	-0.95168	-0.980543	-0.480553
RPS8--NM-001012--chr1--+	-0.658977	-1.02281	-0.122577	0.222987	-0.838556	-0.660664	0.300148	0.0114196	-1.188	-0.404334	0.108368	-1.76243	-1.76243	0.0762283	-1.76243	0.466866	-1.76243	0.289565	-0.470247	-0.173639	-0.0916554	0.654178	-0.31222	-0.0746357	-0.257057	0.422816	-0.124037	-0.675775	-0.58372	-1.76243	-1.76243	0.294652	-0.900633	-1.76243	0.217099	-0.324791	-1.01953	1.14028	-1.76243	-1.76243	-0.0608969	-1.00021	-0.999309	0.326078	0.190199	-1.76243	-1.42446	-0.696548	-0.708792
TMSB10--NM-021103--chr2--+	-0.606263	-1.19484	-0.0762418	-0.513665	-1.19484	-0.788282	-0.468445	-0.228279	-1.19484	-0.738001	-0.540891	-1.19484	-1.19484	-0.350696	-1.19484	-1.19484	-1.19484	-1.19484	-0.770192	-0.99662	-0.860662	-0.971417	-0.231961	-0.85461	-1.19484	-0.349285	-0.37278	-1.19484	-1.19484	-1.19484	0.657184	-1.19484	-0.677158	-1.19484	-0.662715	-1.19484	-0.883507	0.0013396	0.510986	-0.794848	-0.874159	-1.19484	-0.873104	-0.0881528	-0.588465	-1.19484	-0.612759	-1.19484	-1.19484
TMSB4X--NM-021109--chrX--+	-1.28347	-0.967002	-1.78637	-0.62814	-1.51198	-0.614949	-0.684512	-0.960497	-1.78637	-1.13234	-0.480569	-0.214712	-1.01548	-0.854333	-0.534697	-1.78637	-1.78637	-1.78637	-0.824911	-0.605465	-1.12109	-1.01068	-0.963643	-1.03794	-1.00544	0.321414	-0.638774	-1.78637	-0.790014	-0.882726	0.088684	-0.599124	-0.221719	-1.26345	-0.655767	-1.41883	-1.31964	-0.195614	-0.0431756	-1.20383	-0.695172	-1.14207	-0.784162	-1.18464	-1.14915	-0.745144	-1.1208	-0.885386	-0.895736
TTR--NM-000371--chr18--+	0.964788	-0.23232	2	0.766404	1.12795	1.00183	0.710011	0.834445	-0.208193	0.750596	1.29927	2	-0.0424468	0.502464	0.252496	1.65706	-2	1.81683	1.15631	1.1624	1.06798	1.1082	2	0.943191	1.80962	0.352481	0.867017	1.61343	-0.375035	1.29624	2	0.830741	2	-1.20279	1.26533	0.955141	0.96307	0.642086	2	-0.243363	0.828796	0.543735	0.379063	0.256483	0.730464	1.40201	0.421531	-0.613109	0.992815
[truncated: 398 more columns]
