# Supplementary material for: Long-read single-cell sequencing reveals expressions of hypermutation clusters of isoforms in human liver cancer cells
Source: eLife. 2024 Jan 11;12:RP87607. doi: 10.7554/eLife.87607 (PMC10945587; doi:10.7554/eLife.87607)
Supplement: Supplementary file 13. [file elife-87607-supp13.xlsx]

## Sheet: Sheet0
Supplemental table 13. Signaling pathways impacted by differential gene expression
Ingenuity Canonical Pathways	-log(p-value)	Ratio	Molecules
EIF2 Signaling	104	0.378	ACTB,ATF5,EIF1,EIF3K,EIF4A1,FAU,HSPA5,PPP1R15A,RPL10,RPL10A,RPL11,RPL12,RPL13,RPL13A,RPL14,RPL15,RPL17,RPL18,RPL18A,RPL19,RPL21,RPL22,RPL23,RPL23A,RPL24,RPL26,RPL27,RPL27A,RPL28,RPL29,RPL3,RPL30,RPL31,RPL32,RPL34,RPL35,RPL35A,RPL36,RPL36AL,RPL37,RPL37A,RPL38,RPL39,RPL4,RPL41,RPL5,RPL6,RPL7,RPL7A,RPL8,RPL9,RPLP0,RPLP1,RPLP2,RPS10,RPS11,RPS12,RPS13,RPS14,RPS15,RPS15A,RPS16,RPS17,RPS18,RPS19,RPS2,RP…
Acute Phase Response Signaling	35.8	0.216	A2M,AGT,AHSG,AMBP,APCS,APOA1,APOA2,APOH,C1R,C1S,C3,C4A/C4B,CFB,CP,F2,FGA,FGB,FGG,FN1,FOS,FTL,HP,HPX,HRG,ITIH3,ITIH4,JUN,ORM1,ORM2,PLG,RBP1,RBP4,SAA1,SAA2,SAA4,SERPINA1,SERPINA3,SERPING1,TF,TTR
Coronavirus Pathogenesis Pathway	34	0.196	AGT,CCL5,EEF1A1,FAU,FOS,JUN,KNG1,NPM1,RPS10,RPS11,RPS12,RPS13,RPS14,RPS15,RPS15A,RPS16,RPS17,RPS18,RPS19,RPS2,RPS20,RPS21,RPS23,RPS24,RPS25,RPS27,RPS27A,RPS27L,RPS28,RPS29,RPS3,RPS3A,RPS4X,RPS4Y1,RPS5,RPS6,RPS7,RPS8,RPS9,RPSA
LXR/RXR Activation	32.9	0.268	A1BG,AGT,AHSG,AMBP,APOA1,APOA2,APOB,APOC1,APOC2,APOC3,APOC4,APOE,APOH,APOM,C3,C4A/C4B,CLU,ECHS1,FGA,GC,HPX,ITIH4,KNG1,ORM1,ORM2,RBP4,SAA1,SAA2,SAA4,SERPINA1,TF,TTR,VTN
FXR/RXR Activation	31.1	0.254	A1BG,AGT,AHSG,AMBP,APOA1,APOA2,APOB,APOC1,APOC2,APOC3,APOC4,APOE,APOH,APOM,C3,C4A/C4B,CLU,FGA,GC,HPX,ITIH4,KNG1,ORM1,ORM2,RBP4,SAA1,SAA2,SAA4,SERPINA1,TF,TTR,VTN
Regulation of eIF4 and p70S6K Signaling	30.5	0.196	EIF1,EIF3K,EIF4A1,FAU,RPS10,RPS11,RPS12,RPS13,RPS14,RPS15,RPS15A,RPS16,RPS17,RPS18,RPS19,RPS2,RPS20,RPS21,RPS23,RPS24,RPS25,RPS27,RPS27A,RPS27L,RPS28,RPS29,RPS3,RPS3A,RPS4X,RPS4Y1,RPS5,RPS6,RPS7,RPS8,RPS9,RPSA
DHCR24 Signaling Pathway	29.8	0.234	A1BG,AGT,AHSG,AMBP,APOA1,APOA2,APOB,APOC1,APOC2,APOC3,APOC4,APOE,APOH,APOM,C3,C4A/C4B,CLU,FGA,GC,HPX,ITIH4,KNG1,ORM1,ORM2,RBP4,SAA1,SAA2,SAA4,SERPINA1,TF,TTR,VTN
mTOR Signaling	26.9	0.164	EIF3K,EIF4A1,FAU,RPS10,RPS11,RPS12,RPS13,RPS14,RPS15,RPS15A,RPS16,RPS17,RPS18,RPS19,RPS2,RPS20,RPS21,RPS23,RPS24,RPS25,RPS27,RPS27A,RPS27L,RPS28,RPS29,RPS3,RPS3A,RPS4X,RPS4Y1,RPS5,RPS6,RPS7,RPS8,RPS9,RPSA
Clathrin-mediated Endocytosis Signaling	17	0.125	ACTB,ACTG1,APOA1,APOA2,APOB,APOC1,APOC2,APOC3,APOC4,APOE,APOM,ARPC3,CLU,F2,HSPA8,ORM1,ORM2,RBP4,RPS27A,SAA4,SERPINA1,TF,UBA52,UBB,UBC,UBD
Oxidative Phosphorylation	16.3	0.179	ATP5F1E,ATP5MC2,ATP5MC3,ATP5MG,ATP5PF,COX4I1,COX5B,COX6B1,COX6C,COX7A2,COX7B,COX7C,CYB5A,NDUFA13,NDUFA4,NDUFS5,UQCR11,UQCRB,UQCRH,UQCRQ
Mitochondrial Dysfunction	14.3	0.0841	ATP5F1E,ATP5MC2,ATP5MC3,ATP5MG,ATP5PF,CALM1 (includes others),COX4I1,COX5B,COX6B1,COX6C,COX7A2,COX7B,COX7C,CYB5A,GPX1,GPX4,GSTA1,GSTP1,MGST1,MGST3,NDUFA13,NDUFA4,NDUFS5,SOD1,TOMM7,UQCR11,UQCRB,UQCRH,UQCRQ
Glucocorticoid Receptor Signaling	12	0.0584	A2M,ACTB,AGT,ATP5F1E,B2M,CCL5,FGG,FOS,H3-3A/H3-3B,HLA-A,HLA-B,HLA-C,HLA-DPA1,HLA-DPB1,HLA-DQB1,HLA-DRA,HLA-DRB1,HLA-E,HMGB1,HP,HSP90AA1,HSP90AB1,HSP90B1,HSPA1A/HSPA1B,HSPA5,HSPA8,IL7R,JUN,KRT18,NDUFA13,NDUFA4,NDUFS5,PCK1,PLA2G2A
Antigen Presentation Pathway	11.6	0.282	B2M,CD74,HLA-A,HLA-B,HLA-C,HLA-DPA1,HLA-DPB1,HLA-DQB1,HLA-DRA,HLA-DRB1,HLA-E
NRF2-mediated Oxidative Stress Response	10.9	0.0886	ACTB,ACTG1,CYP2A6 (includes others),DNAJA1,DNAJB1,FOS,FTH1,FTL,GSTA1,GSTO1,GSTP1,HSP90AA1,HSP90AB1,HSP90B1,JUN,MGST1,MGST3,PPIB,SOD1,TXN,UBB
Atherosclerosis Signaling	10.4	0.12	APOA1,APOA2,APOB,APOC1,APOC2,APOC3,APOC4,APOE,APOM,CLU,ORM1,ORM2,PLA2G2A,RBP4,SAA4,SERPINA1
Maturity Onset Diabetes of Young (MODY) Signaling	10.3	0.165	ALDOB,APOA1,APOA2,APOB,APOC1,APOC2,APOC3,APOC4,APOE,APOH,APOM,FABP1,GAPDH
IL-12 Signaling and Production in Macrophages	10.1	0.0851	APOA1,APOA2,APOB,APOC1,APOC2,APOC3,APOC4,APOE,APOM,C3,CALM1 (includes others),CLU,FOS,H3-3A/H3-3B,JUN,ORM1,ORM2,RBP4,SAA4,SERPINA1
Protein Ubiquitination Pathway	9.76	0.0769	B2M,DNAJA1,DNAJB1,HLA-A,HLA-B,HLA-C,HLA-E,HSP90AA1,HSP90AB1,HSP90B1,HSPA1A/HSPA1B,HSPA5,HSPA8,HSPD1,HSPE1,HSPH1,RPS27A,UBA52,UBB,UBC,UBD
Coagulation System	9.15	0.257	A2M,F2,FGA,FGB,FGG,KNG1,PLG,SERPINA1,SERPINC1
Production of Nitric Oxide and Reactive Oxygen Species in Macrophages	8.97	0.089	APOA1,APOA2,APOB,APOC1,APOC2,APOC3,APOC4,APOE,APOM,CLU,FOS,JUN,ORM1,ORM2,RBP4,SAA4,SERPINA1
Complement System	7.55	0.216	C1R,C1S,C3,C4A/C4B,C7,CFB,CFH,SERPING1
Crosstalk between Dendritic Cells and Natural Killer Cells	6.36	0.11	ACTB,ACTG1,HLA-A,HLA-B,HLA-C,HLA-DRA,HLA-DRB1,HLA-E,LTB,TYROBP
Extrinsic Prothrombin Activation Pathway	5.77	0.312	F2,FGA,FGB,FGG,SERPINC1
Glutathione Redox Reactions I	5.77	0.214	GPX1,GPX4,GSTA1,GSTP1,MGST1,MGST3
PD-1, PD-L1 cancer immunotherapy pathway	5.71	0.0935	B2M,HLA-A,HLA-B,HLA-C,HLA-DPA1,HLA-DPB1,HLA-DQB1,HLA-DRA,HLA-DRB1,HLA-E
Neuroinflammation Signaling Pathway	5.13	0.0505	B2M,CCL5,FOS,HLA-A,HLA-B,HLA-C,HLA-DPA1,HLA-DPB1,HLA-DQB1,HLA-DRA,HLA-DRB1,HLA-E,HMGB1,JUN,PLA2G2A,TYROBP
IL-10 Signaling	5.08	0.0714	FOS,HLA-A,HLA-B,HLA-C,HLA-DPA1,HLA-DPB1,HLA-DQB1,HLA-DRA,HLA-DRB1,HLA-E,JUN
Multiple Sclerosis Signaling Pathway	4.95	0.0586	C3,C7,HLA-A,HLA-B,HLA-C,HLA-DPA1,HLA-DPB1,HLA-DQB1,HLA-DRA,HLA-DRB1,HLA-E,IL7R,LTB
Pathogen Induced Cytokine Storm Signaling Pathway	4.86	0.0458	C3,CCL14,CCL5,FGA,FGB,FGG,FOS,FTH1,FTL,HLA-DPA1,HLA-DPB1,HLA-DQB1,HLA-DRA,HLA-DRB1,JUN,LTB,SRGN
Role of PKR in Interferon Induction and Antiviral Response	4.77	0.0735	FOS,HMGB1,HSP90AA1,HSP90AB1,HSP90B1,HSPA1A/HSPA1B,HSPA5,HSPA8,JUN,NPM1
Intrinsic Prothrombin Activation Pathway	4.69	0.143	F2,FGA,FGB,FGG,KNG1,SERPINC1
Xenobiotic Metabolism AHR Signaling Pathway	4.63	0.092	GSTA1,GSTO1,GSTP1,HSP90AA1,HSP90AB1,HSP90B1,MGST1,MGST3
Aldosterone Signaling in Epithelial Cells	4.62	0.064	DNAJA1,DNAJB1,HSP90AA1,HSP90AB1,HSP90B1,HSPA1A/HSPA1B,HSPA5,HSPA8,HSPD1,HSPE1,HSPH1
Unfolded protein response	4.52	0.0889	DNAJA1,DNAJB1,HSP90B1,HSPA1A/HSPA1B,HSPA5,HSPA8,HSPH1,PPP1R15A
Neuroprotective Role of THOP1 in Alzheimer's Disease	4.39	0.0744	AGT,C1R,HLA-A,HLA-B,HLA-C,HLA-E,KNG1,PLG,SERPINA3
Cachexia Signaling Pathway	4.33	0.0435	AGT,AZGP1,EIF1,FGA,FGB,FGG,HMGB1,HSP90AA1,HSP90AB1,HSP90B1,HSPA1A/HSPA1B,HSPA5,HSPA8,LTB,MALAT1,SERPINA1
LPS/IL-1 Mediated Inhibition of RXR Function	4.28	0.0506	APOC1,APOC2,APOC4,APOE,CYP2A6 (includes others),FABP1,FABP4,GSTA1,GSTO1,GSTP1,JUN,MGST1,MGST3
Aryl Hydrocarbon Receptor Signaling	4.19	0.0629	FOS,GSTA1,GSTO1,GSTP1,HSP90AA1,HSP90AB1,HSP90B1,JUN,MGST1,MGST3
HER-2 Signaling in Breast Cancer	4.18	0.0529	AREG,COX4I1,COX5B,COX6B1,COX6C,COX7A2,COX7B,COX7C,CYB5A,FOS,JUN,RPS6
Caveolar-mediated Endocytosis Signaling	4.16	0.0933	ACTB,ACTG1,B2M,HLA-A,HLA-B,HLA-C,HLA-E
Natural Killer Cell Signaling	4.07	0.0556	B2M,CFL1,HCST,HLA-A,HLA-B,HLA-C,HLA-E,HSPA1A/HSPA1B,HSPA5,HSPA8,TYROBP
Toll-like Receptor Signaling	4.05	0.0897	FOS,JUN,RPS27A,UBA52,UBB,UBC,UBD
Renal Cell Carcinoma Signaling	4.01	0.0886	FOS,JUN,RPS27A,UBA52,UBB,UBC,UBD
Role of JAK family kinases in IL-6-type Cytokine Signaling	4.01	0.0886	FOS,HSP90AA1,HSP90AB1,HSP90B1,SERPINA1,SERPINA3,TIMP1
ILK Signaling	4.01	0.0547	ACTB,ACTG1,CFL1,FN1,FOS,JUN,KRT18,MYL6,NACA,TMSB10/TMSB4X,VIM
Glutathione-mediated Detoxification	3.87	0.135	GSTA1,GSTO1,GSTP1,MGST1,MGST3
Sirtuin Signaling Pathway	3.73	0.0445	ATP5F1E,ATP5PF,GABARAP,GADD45B,H3-3A/H3-3B,JUN,NDUFA13,NDUFA4,NDUFS5,PCK1,SLC25A6,SOD1,TOMM7
Immunogenic Cell Death Signaling Pathway	3.65	0.0778	HMGB1,HSP90AA1,HSP90AB1,HSP90B1,HSPA1A/HSPA1B,HSPA5,HSPA8
Apelin Adipocyte Signaling Pathway	3.62	0.0769	GPX1,GPX4,GSTA1,GSTP1,MGST1,MGST3,SOD1
MIF Regulation of Innate Immunity	3.51	0.114	CD74,FOS,JUN,MIF,PLA2G2A
Estrogen Receptor Signaling	3.3	0.0367	AGT,ATP5F1E,CFL1,DDX5,FOS,HSP90AA1,HSP90AB1,HSP90B1,JUN,MYL12A,MYL12B,MYL6,NDUFA13,NDUFA4,NDUFS5
Actin Cytoskeleton Signaling	3.28	0.0451	ACTB,ACTG1,ARPC3,CFL1,F2,FN1,KNG1,MYL12A,MYL12B,MYL6,TMSB10/TMSB4X
Huntington's Disease Signaling	3.28	0.0423	ATP5F1E,ATP5PF,DNAJB1,HSPA1A/HSPA1B,HSPA5,HSPA8,JUN,RPS27A,UBA52,UBB,UBC,UBD
HIF1α Signaling	3.25	0.0481	HSP90AA1,HSPA1A/HSPA1B,HSPA5,HSPA8,JUN,RACK1,RPS6,SAT1,TF,VIM
Th2 Pathway	3.25	0.0584	HLA-A,HLA-B,HLA-DPA1,HLA-DPB1,HLA-DQB1,HLA-DRA,HLA-DRB1,JUN
Iron homeostasis signaling pathway	3.25	0.0584	CP,FTH1,FTL,HBA1/HBA2,HBB,HP,HPX,TF
Hereditary Breast Cancer Signaling	3.14	0.0563	ACTB,GADD45B,NPM1,RPS27A,UBA52,UBB,UBC,UBD
Eumelanin Biosynthesis	2.97	0.5	DDT,MIF
NOD1/2 Signaling Pathway	2.95	0.0476	FOS,HSP90AA1,HSP90AB1,HSP90B1,HSPA1A/HSPA1B,HSPA5,HSPA8,JUN,LTB
Airway Pathology in Chronic Obstructive Pulmonary Disease	2.95	0.0593	AMBP,APOM,LTB,ORM1,ORM2,PTGDS,RBP4
Virus Entry via Endocytic Pathways	2.95	0.0593	ACTB,ACTG1,B2M,HLA-A,HLA-B,HLA-C,HLA-E
MSP-RON Signaling in Macrophages Pathway	2.92	0.0588	FOS,HLA-DPA1,HLA-DPB1,HLA-DQB1,HLA-DRA,HLA-DRB1,JUN
eNOS Signaling	2.88	0.0513	CALM1 (includes others),HSP90AA1,HSP90AB1,HSP90B1,HSPA1A/HSPA1B,HSPA5,HSPA8,KNG1
Xenobiotic Metabolism CAR Signaling Pathway	2.87	0.0464	GSTA1,GSTO1,GSTP1,HSP90AA1,HSP90AB1,HSP90B1,MGST1,MGST3,RACK1
Th1 Pathway	2.86	0.0574	HLA-A,HLA-B,HLA-DPA1,HLA-DPB1,HLA-DQB1,HLA-DRA,HLA-DRB1
RHOA Signaling	2.82	0.0565	ACTB,ACTG1,ARPC3,CFL1,MYL12A,MYL12B,MYL6
ABRA Signaling Pathway	2.8	0.0652	ACTB,ACTG1,CALD1,CFL1,FOS,TAGLN
Phagosome Maturation	2.74	0.0488	B2M,DYNLL1,HLA-A,HLA-B,HLA-C,HLA-DRA,HLA-DRB1,HLA-E
Ferroptosis Signaling Pathway	2.68	0.0534	FTH1,FTL,GPX4,H2AC18/H2AC19,PEBP1,SAT1,TF
CDC42 Signaling	2.63	0.0295	ARPC3,B2M,CFL1,FOS,HLA-A,HLA-B,HLA-C,HLA-DPA1,HLA-DPB1,HLA-DQB1,HLA-DRA,HLA-DRB1,HLA-E,JUN,MYL12A,MYL12B,MYL6
Th1 and Th2 Activation Pathway	2.61	0.0465	HLA-A,HLA-B,HLA-DPA1,HLA-DPB1,HLA-DQB1,HLA-DRA,HLA-DRB1,JUN
Signaling by Rho Family GTPases	2.44	0.0375	ACTB,ACTG1,ARPC3,CFL1,FOS,JUN,MYL12A,MYL12B,MYL6,VIM
Macrophage Alternative Activation Signaling Pathway	2.36	0.0423	FOS,H3-3A/H3-3B,HLA-DPA1,HLA-DPB1,HLA-DQB1,HLA-DRA,HLA-DRB1,JUN
Regulation of Actin-based Motility by Rho	2.32	0.0522	ACTB,ARPC3,CFL1,MYL12A,MYL12B,MYL6
Chemokine Signaling	2.31	0.0617	CALM1 (includes others),CCL5,CFL1,FOS,JUN
IL-17A Signaling in Gastric Cells	2.3	0.115	CCL5,FOS,JUN
Xenobiotic Metabolism PXR Signaling Pathway	2.28	0.041	GSTA1,GSTO1,GSTP1,HSP90AA1,HSP90AB1,HSP90B1,MGST1,MGST3
Neuregulin Signaling	2.28	0.0513	AREG,DCN,HSP90AA1,HSP90AB1,HSP90B1,RPS6
CSDE1 Signaling Pathway	2.16	0.0714	FN1,FOS,RPL9,VIM
Polyamine Regulation in Colon Cancer	2.08	0.0678	FOS,JUN,OAZ1,SAT1
GABA Receptor Signaling	2.04	0.0455	GABARAP,RPS27A,UBA52,UBB,UBC,UBD
Tumor Microenvironment Pathway	1.95	0.0391	FN1,FOS,HLA-A,HLA-B,HLA-C,HLA-E,JUN
MIF-mediated Glucocorticoid Regulation	1.9	0.0833	CD74,MIF,PLA2G2A
Interferon Signaling	1.9	0.0833	IFITM1,IFITM2,IFITM3
Hepatic Fibrosis Signaling Pathway	1.88	0.0284	AGT,CALM1 (includes others),CCL5,FOS,FTH1,FTL,JUN,MYL12A,MYL12B,MYL6,TF,TIMP1
Xenobiotic Metabolism General Signaling Pathway	1.88	0.042	FTL,GSTA1,GSTO1,GSTP1,MGST1,MGST3
MicroRNA Biogenesis Signaling Pathway	1.86	0.0374	DDX5,DNAJB1,HNRNPA2B1,HSP90AA1,HSP90AB1,HSP90B1,HSPA8
SPINK1 General Cancer Pathway	1.85	0.058	MT1E,MT1G,MT1X,MT2A
Macrophage Classical Activation Signaling Pathway	1.83	0.037	CCL5,HLA-DPA1,HLA-DPB1,HLA-DQB1,HLA-DRA,HLA-DRB1,LTB
PPAR Signaling	1.82	0.0467	FOS,HSP90AA1,HSP90AB1,HSP90B1,JUN
Cellular Effects of Sildenafil (Viagra)	1.78	0.04	ACTB,ACTG1,CALM1 (includes others),MYL12A,MYL12B,MYL6
Granzyme A Signaling	1.73	0.0533	FN1,NDUFA13,NDUFA4,NDUFS5
Xenobiotic Metabolism Signaling	1.72	0.0306	FTL,GSTA1,GSTO1,GSTP1,HSP90AA1,HSP90AB1,HSP90B1,MGST1,MGST3
Hypoxia Signaling in the Cardiovascular System	1.71	0.0526	HSP90AA1,HSP90AB1,HSP90B1,JUN
Coronavirus Replication Pathway	1.64	0.0667	IFITM1,IFITM2,IFITM3
Role of Tissue Factor in Cancer	1.64	0.0338	CFL1,F2,FGA,FGB,FGG,FOS,JUN
Nitric Oxide Signaling in the Cardiovascular System	1.63	0.0417	CALM1 (includes others),HSP90AA1,HSP90AB1,HSP90B1,KNG1
iNOS Signaling	1.59	0.0638	CALM1 (includes others),FOS,JUN
BAG2 Signaling Pathway	1.55	0.0471	HSP90AA1,HSPA1A/HSPA1B,HSPA5,HSPA8
RHOGDI Signaling	1.51	0.0318	ACTB,ACTG1,ARPC3,CFL1,MYL12A,MYL12B,MYL6
WNT/β-catenin Signaling	1.5	0.0345	JUN,RPS27A,UBA52,UBB,UBC,UBD
Endoplasmic Reticulum Stress Pathway	1.49	0.0952	HSP90B1,HSPA5
UVB-Induced MAPK Signaling	1.48	0.0577	FOS,H3-3A/H3-3B,JUN
Pulmonary Fibrosis Idiopathic Signaling Pathway	1.47	0.0276	ACTB,ACTG1,AREG,F2,FN1,FOS,JUN,PLG,VIM
Gα12/13 Signaling	1.46	0.0376	F2,JUN,MYL12A,MYL12B,MYL6
Pyrimidine Deoxyribonucleotides De Novo Biosynthesis I	1.42	0.087	NME2,PCK1
Vitamin-C Transport	1.42	0.087	GSTO1,TXN
NADH Repair	1.4	0.333	GAPDH
Glycine Biosynthesis III	1.4	0.333	AGXT
Ascorbate Recycling (Cytosolic)	1.4	0.333	GSTO1
IL-17 Signaling	1.38	0.0321	FOS,HSP90AA1,HSP90AB1,HSP90B1,JUN,LTB
Glycolysis I	1.35	0.08	ALDOB,GAPDH
Gluconeogenesis I	1.35	0.08	ALDOB,GAPDH
PPARα/RXRα Activation	1.31	0.0309	APOA1,APOA2,HSP90AA1,HSP90AB1,HSP90B1,JUN
Hepatic Fibrosis / Hepatic Stellate Cell Activation	1.31	0.0309	A2M,AGT,CCL5,FN1,MYL6,TIMP1
